# Supplementary material for: Facile synthesis of the spiro-pyridoindolone scaffoldviaa gold-catalysed intramolecular alkynol cyclisation/hydroindolylation
Source: Royal Society of Chemistry journal article supplement (doi:10.1039/d1ob02483c), 2022-01-01

Electronic Supplementary Information

**Facile Synthesis of the Spiro-Pyridoindolone Scaffold *via* a Gold-Catalysed Intramolecular Alkynol Cyclisation/Hydroindoloylation**

Mahesh H. Shinde, Chepuri V. Ramana\*

*Division of Organic Chemistry, CSIR-National Chemical Laboratory*

*Dr. Homi Bhabha Road, Pune 411 008, India*

*Academy of Scientific and Innovative Research (AcSIR), Ghaziabad-201002, India*

*Email: vr.chepuri@ncl.res.in*

**Table of Contents**

|    |                                                                                                 |          |
|----|-------------------------------------------------------------------------------------------------|----------|
| 1  | General information                                                                             | S2       |
| 2  | Procedure for Synthesis of Alkene <b>6</b> & Spectral Data                                      | S2       |
| 3  | Procedure for Synthesis of Alcohol <b>7</b> & Spectral Data                                     | S2       |
| 4  | Procedure for Synthesis of Acid <b>5</b> , <b>5a</b> , <b>5b</b> & Spectral Data                | S3       |
| 5  | Synthesis of Alkynylamine <b>1t</b> & Spectral Data                                             | S4       |
| 6  | Synthesis of Alkynol <b>1u</b> & Spectral Data                                                  | S4       |
| 7  | Indole-Acid Coupling & Spectral Data                                                            | S5–S9    |
| 8  | Spectral Data of Tetrahydrofuran Intermediates <b>9a</b> , <b>10a</b> , <b>11a</b> , <b>12a</b> | S10      |
| 9  | Spectral Data of Hydration Products <b>3a</b> , <b>3p</b> , <b>3s</b> , <b>3t</b>               | S11      |
| 10 | References                                                                                      | S11      |
| 14 | Spectra of Starting Compounds & Products                                                        | S12–S303 |

## Experimental

**General Information:** Standard inert atmosphere techniques were used in handling all air and moisture sensitive reagents. Reactions were carried out under an Argon atmosphere in oven dried glassware. All solvents were dried according to standard procedures and techniques before use. Reactions were monitored by thin-layer chromatography (TLC Silica gel 60 F254 from Merck), visualised under dual short/long wave UV fluorescence ( $\lambda_{\text{max}} = 254$  and 365 nm) and developed with *p*-anisaldehyde stains, followed by heating. Column chromatography was performed on silica (60–120, 100–200 and 230–400 mesh size). Melting Points were measured and are uncorrected. NMR spectroscopy:  $^1\text{H}$  NMR spectroscopy measurements were carried out on 400 and 500 MHz NMR spectrometers with  $\text{CDCl}_3$  ( $\delta$  7.27) as an internal standard unless otherwise stated. The  $^{13}\text{C}$  NMR spectra were recorded on at 400 (100 MHz) or 500 (125 MHz) NMR spectrometer with  $\text{CDCl}_3$  ( $\delta$  77.0) as an internal standard unless otherwise stated. Chemical shifts ( $\delta$ ) are given in ppm downfield from TMS, and coupling constants ( $J$ ) are in Hertz (Hz). The  $^1\text{H}$  NMR spectra are reported as follows:  $\delta$ /ppm (multiplicity, coupling constant followed by number of protons). Multiplicity of  $^1\text{H}$  NMR is abbreviated as follows: s = singlet, d = doublet, dd = doublet of doublets, t = triplet, dt = doublet of triplet, q = quartet, dq = doublet of quartet, m = multiplet. The multiplicity of  $^{13}\text{C}$  NMR signals was assigned with the help of DEPT spectra and the abbreviations used: s = singlet, d = doublet, t = triplet, q = quartet represents C (quaternary), CH,  $\text{CH}_2$  and  $\text{CH}_3$  respectively. High Resolution Mass Spectra (HRMS) were recorded on a Q Exactive Hybrid Quadrupole Orbitrap Mass Spectrometer.

**2-(Hept-6-en-3-yn-1-yloxy)tetrahydro-2H-pyran (6):**<sup>1</sup> At rt, a solution of THP-protected but-3-ynol (8.0 g, 51.9 mmol) in DMF (60 ml) was treated with allyl bromide (8.97 mL, 103.8 mmol),  $\text{K}_2\text{CO}_3$  (10.75 g, 77.8 mmol),  $\text{Na}_2\text{SO}_3$  (3.27 g, 25.9 mmol), CuI (988 mg, 5.2 mmol), and cat. DBU sequentially and the reaction mixture was stirred for 12 h at rt. The reaction mixture was filtered through celite pad (washed with EtOAc), diluted with EtOAc (200 mL X 2), washed with water (2 x 100 mL), brine (50 mL), dried ( $\text{Na}_2\text{SO}_4$ ) and concentrated under reduced pressure. The resulting crude was purified by column chromatography to afford alkene **6** (9.2 g, 91% yield) as a colourless liquid.  $R_f = 0.8$  (10% ethyl acetate in petroleum ether);  $^1\text{H}$  NMR (400 MHz,  $\text{CDCl}_3$ ):  $\delta$  1.49–1.65 (m, 4H), 1.71 (tt,  $J = 13.1, 3.5$  Hz, 1H), 1.80–1.88 (m, 1H), 2.50 (tt,  $J = 7.1, 2.3$  Hz, 2H), 2.89–2.98 (m, 2H), 3.45–3.60 (m, 2H), 3.77–3.94 (m, 2H), 4.65 (t,  $J = 3.0$  Hz, 1H), 5.05 (dq,  $J = 10.0, 1.6$  Hz, 1H), 5.32 (dq,  $J = 10.0, 1.6$  Hz, 1H), 5.81 (ddt,  $J = 10.0, 5.0, 1.6$  Hz, 1H);  $^{13}\text{C}\{^1\text{H}\}$  NMR (100 MHz,  $\text{CDCl}_3$ ):  $\delta$  19.4 (t), 20.2 (t), 23.1 (t), 25.4 (t), 30.6 (t), 62.2 (t), 66.1 (t), 77.7 (s), 79.4 (s), 98.7 (d), 115.7 (t), 133.1 (d) ppm; HRMS (ESI) calcd for  $\text{C}_{12}\text{H}_{18}\text{NaO}_2$ : 217.1199 [M + Na]<sup>+</sup>; found 217.1197.

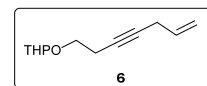

**7-((Tetrahydro-2H-pyran-2-yl)oxy)hept-4-yn-1-ol (7):**<sup>2</sup> A mixture of alkene **6** (9.2 g, 47.36 mmol) and 9-BBN dimer (5.78 g, 23.7 mmol) was heated at 50 °C for 10 min. The contents were cooled to 0 °C, diluted with THF (100 mL) and stirred at rt for 5 h. The reaction mixture was treated with 30%  $\text{H}_2\text{O}_2$  (37.0 mL, 473.6 mmol) and 3M NaOH (157.8 mL, 473.6 mmol) and stirring was continued at rt for 12 h.

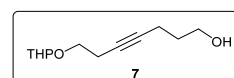

The reaction mixture was diluted with cold water (200 mL) and was extracted with EtOAc (200 mL X 2). The combined organic layer was washed with brine (100 mL), dried ( $\text{Na}_2\text{SO}_4$ ) and concentrated under reduced pressure. Purification of the resulting crude by column chromatography gave the alcohol **7** (4.94 g, 76% yield brsm) as colourless liquid along with the starting olefin **6** (3.3 g).  $R_f = 0.4$  (50% ethyl acetate in petroleum ether);  $^1\text{H}$  NMR (400 MHz,  $\text{CDCl}_3$ ):  $\delta$  1.49–1.64 (m, 4H),

1.69–1.77 (m, 4H), 1.80–1.88 (m, 1H), 2.28 (tt,  $J = 6.8, 2.3$  Hz, 2H), 2.46 (tt,  $J = 6.8, 2.4$  Hz, 2H), 3.53 (dt,  $J = 9.6, 7.1$  Hz, 2H), 3.74–3.83 (m, 3H), 3.89 (tt,  $J = 8.3, 3.0$  Hz, 1H), 4.64 (t,  $J = 4.6$  Hz, 1H);  $^{13}\text{C}\{^1\text{H}\}$  NMR (100 MHz,  $\text{CDCl}_3$ ):  $\delta$  15.5 (t), 19.4 (t), 20.2 (t), 25.4 (t), 30.6 (t), 31.4 (t), 62.0 (t), 62.3 (t), 66.1 (t), 77.7 (s), 80.4 (s), 98.8 (d) ppm; HRMS (ESI) calcd for  $\text{C}_{12}\text{H}_{20}\text{NNaO}_3$ : 235.1305  $[\text{M} + \text{Na}]^+$ ; found 235.1299.

**7-((Tetrahydro-2H-pyran-2-yl)oxy)hept-4-ynoic acid (5):**<sup>2–3</sup> A solution of alcohol **7** (4.9 g, 23.1 mmol) in  $\text{CH}_2\text{Cl}_2$  (100 mL) was treated with PCC (9.95 g, 46.2 mmol) and stirred for 12 h at rt. The reaction mixture was filtered through silica bed using  $\text{CH}_2\text{Cl}_2$  as eluent to obtain the crude aldehyde as colourless liquid which was used directly for the next step. The above crude aldehyde was dissolved in a 1:1  $\text{CH}_3\text{CN}/\text{H}_2\text{O}$  (50 mL) and treated with  $\text{NaClO}_2$  (1.88 g, 20.8 mmol),  $\text{NaH}_2\text{PO}_4$  (2.5 g, 20.8 mmol) and 30%  $\text{H}_2\text{O}_2$  (1.63 mL, 20.8 mmol) and the contents were stirred at rt for 2 h. The reaction mixture was quenched by adding  $\text{Na}_2\text{SO}_3$  (2.63 g, 20.8 mmol) and then extracted with EtOAc (100 X 2 mL). The combined organic layer was washed with water (50 mL), brine (50 mL), dried ( $\text{Na}_2\text{SO}_4$ ) and concentrated under reduced pressure. The resulting crude was purified by column chromatography to afford acid **5** as colourless liquid (3.62 g, 69% yield, 2 steps).  $R_f = 0.3$  (50% ethyl acetate in petroleum ether);  $^1\text{H}$  NMR (400 MHz,  $\text{CDCl}_3$ ):  $\delta$  1.47–1.65 (m, 4H), 1.72 (tt,  $J = 13.0, 3.1$  Hz, 1H), 1.79–1.88 (m, 1H), 2.43–2.49 (m, 4H), 2.56 (td,  $J = 8.2, 7.5$  Hz, 2H), 3.49–3.55 (m, 2H), 3.78 (dt,  $J = 9.7, 7.1$  Hz, 1H), 3.89 (tt,  $J = 8.2, 3.0$  Hz, 1H), 4.65 (t,  $J = 3.0$  Hz, 1H);  $^{13}\text{C}\{^1\text{H}\}$  NMR (100 MHz,  $\text{CDCl}_3$ ):  $\delta$  14.5 (t), 19.4 (t), 20.2 (t), 25.4 (t), 30.5 (t), 33.7 (t), 62.2 (t), 66.0 (t), 78.0 (s), 78.9 (s), 98.7 (d), 177.4 (s) ppm; HRMS (ESI) calcd for  $\text{C}_{12}\text{H}_{18}\text{NaO}_4$ : 249.1097  $[\text{M} + \text{Na}]^+$ ; found 249.1091

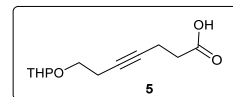

**8-((Tetrahydro-2H-pyran-2-yl)oxy)oct-4-ynoic acid (5a):** prepared by employing OTHP-pent-4-ynol (2.0 g, 10.97 mmol) following 4 steps.<sup>1–3</sup> Acid **5a** (720 mg, 61% yield, 2 steps) was obtained as a colourless liquid;  $R_f = 0.3$  (30% ethyl acetate in petroleum ether);  $^1\text{H}$  NMR (400 MHz,  $\text{CDCl}_3$ ):  $\delta$  1.47–1.62 (m, 4H), 1.67–1.85 (m, 4H), 2.25 (tt,  $J = 6.9, 2.2$  Hz, 2H), 2.42–2.50 (m, 2H), 2.50–2.58 (m, 2H), 3.46 (dt,  $J = 9.7, 6.2$  Hz, 1H), 3.50–3.55 (m, 1H), 3.80 (dt,  $J = 9.7, 6.3$  Hz, 1H), 3.84–3.90 (m, 1H), 4.62 (t,  $J = 3.3$  Hz, 1H);  $^{13}\text{C}\{^1\text{H}\}$  NMR (100 MHz,  $\text{CDCl}_3$ ):  $\delta$  14.5 (t), 15.5 (t), 19.3 (t), 25.4 (t), 28.9 (t), 30.6 (t), 33.8 (t), 62.0 (t), 66.0 (t), 78.2 (s), 80.5 (s), 98.7 (d), 177.3 (s) ppm; HRMS (ESI) calcd for  $\text{C}_{13}\text{H}_{20}\text{NaO}_4$ : 241.1434  $[\text{M} + \text{Na}]^+$ ; found 241.1428.

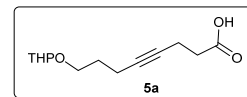

#### Scheme S1. Synthesis of Acid **5b**

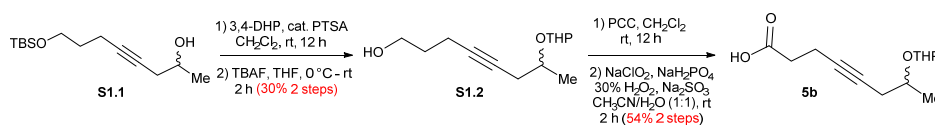

A solution of alcohol **S1.1**<sup>4</sup> (1.5 g, 5.85 mmol), 3,4-dihydropyran (0.64 mL, 7.02 mmol) and pTSA (100 mg, 0.58 mmol) in  $\text{CH}_2\text{Cl}_2$  (30 mL) was stirred at rt for 12 h. After completion of the reaction (indicated by TLC), the reaction mixture was neutralised with the addition of  $\text{Et}_3\text{N}$ . The volatiles were removed under reduced pressure. The resulting crude was dissolved in THF (50 mL) and cooled to 0 °C. To this, tetra-*n*-butyl ammonium fluoride (TBAF 1.38 g, 5.29 mmol) was added at stirred at rt for 2 h. After completion of reaction (indicated by TLC), the reaction was diluted with water (20 mL) and extracted with EtOAc (50 mL X 2), dried ( $\text{Na}_2\text{SO}_4$ ) and concentrated under reduced pressure. The crude was purified by column chromatography to afford alkynol **S1.2** (400 mg, 30% yield, 2 steps) as colourless liquid.

**7-((Tetrahydro-2H-pyran-2-yl)oxy)oct-4-yn-1-ol (S1.2):** Colourless liquid (400 mg, 40%);  $R_f = 0.2$  (20% ethyl acetate in petroleum ether);  $^1\text{H}$  NMR (500 MHz,  $\text{CDCl}_3$ ):  $\delta$  1.21 (d,  $J = 6.1$  Hz, 3H), 1.29 (d,  $J = 6.1$  Hz, 3H), 1.47–1.59 (m, 8H), 1.66–1.76 (m, 6H), 1.78–1.86 (m, 2H), 1.96 (br. s, 2H), 2.23–2.31 (m, 5.6H), 2.32–2.39 (m, 1.6H), 2.45–2.53 (m, 1H), 3.45–3.53 (m, 2H), 3.69–3.77 (m, 4H), 3.83–3.96 (m, 4H), 4.69 (s, 1H), 4.74 (s, 1H);  $^{13}\text{C}\{^1\text{H}\}$  NMR (125 MHz,  $\text{CDCl}_3$ ):  $\delta$  15.4 (t), 15.4 (t), 18.9 (q), 19.6 (t), 19.7 (t), 21.0 (q), 25.4 (t), 25.4

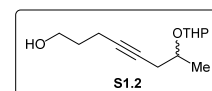

(t), 26.0 (t), 27.4 (t), 30.9 (t), 31.0 (t), 31.4 (t), 31.5 (t), 61.8 (t), 62.4 (t), 62.6 (t), 71.0 (d), 71.3 (d), 77.4 (s), 77.8 (s), 80.9 (s), 80.9 (s), 96.7 (d), 97.7 (d) ppm; HRMS (ESI) calcd for  $C_{13}H_{22}NaO_3$ : 249.1461 [M + Na]<sup>+</sup>; found 249.1459.

**7-((Tetrahydro-2H-pyran-2-yl)oxy)oct-4-ynoic acid (5b):** The alcohol **S1.2** was oxidised to corresponding acid **5b** by following the established procedure<sup>2-3</sup> (54% yield, 2 steps). Colourless liquid;  $R_f$  = 0.2 (30% ethyl acetate in petroleum ether); <sup>1</sup>H NMR (500 MHz, CDCl<sub>3</sub>):  $\delta$  1.22 (d,  $J$  = 6.1 Hz, 2.37H), 1.29 (d,  $J$  = 6.1 Hz, 3H), 1.48–1.61 (m, 7.5H), 1.69–1.75 (m, 2H), 1.80–1.87 (m, 2H), 2.20–2.39 (m, 3H), 2.44–2.52 (m, 4H), 2.53–2.60 (m, 4H), 3.47–3.54 (m, 2H), 3.85–3.98 (m, 3.71H), 4.72 (t,  $J$  = 4.2 Hz, 1H), 4.76 (m, 1H); <sup>13</sup>C{<sup>1</sup>H} NMR (125 MHz, CDCl<sub>3</sub>):  $\delta$  14.5 (t), 19.0 (q), 19.5 (t), 19.8 (t), 21.1 (q), 25.4 (t), 26.1 (t), 27.4 (t), 30.9 (t), 31.0 (t), 33.6 (t), 62.4 (t), 62.7 (t), 71.1 (d), 71.5 (d), 78.0 (s), 78.3 (s), 79.4 (s, 2C), 96.7 (d), 97.8 (d), 176.7 (s) ppm; HRMS (ESI) calcd for  $C_{13}H_{20}NaO_4$ : 263.1254 [M + Na]<sup>+</sup>; found 263.1246.

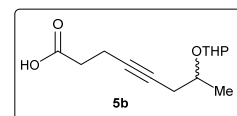

### Scheme S2. Synthesis of alkyneamine **1t**

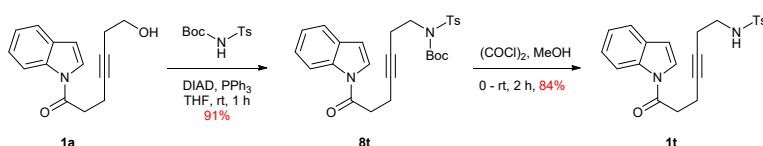

**tert-Butyl (7-(1H-indol-1-yl)-7-oxohept-3-yn-1-yl)(tosyl)carbamate (8t):**<sup>5</sup> At 0 °C, a solution of alcohol **1a** (100 mg, 0.42 mmol), TsNH<sub>Boc</sub> (146 mg, 0.54 mmol), PPh<sub>3</sub> (141 mg, 0.54 mmol) in THF (10 mL) was treated with DIAD (106  $\mu$ L, 0.54 mmol) and stirring was continued at rt for 1 h. The reaction mixture was and purified by column chromatography to afford alkyneamine **8t** (188 mg, 91% yield) as a colourless syrup colourless sticky liquid (188 mg, 91%);  $R_f$  = 0.7 (40% ethyl acetate in petroleum ether); <sup>1</sup>H NMR (400 MHz, CDCl<sub>3</sub>):  $\delta$  1.34 (s, 9H), 2.43 (s, 3H), 2.62 (tt,  $J$  = 7.3, 2.2 Hz, 2H), 2.69 (tt,  $J$  = 7.8, 2.1 Hz, 2H), 3.16 (dd,  $J$  = 8.4, 6.5 Hz, 2H), 3.93–3.98 (m, 2H), 6.66 (d,  $J$  = 3.3 Hz, 1H), 7.26–7.32 (m, 3H), 7.36 (td,  $J$  = 8.3, 1.1 Hz, 1H), 7.49 (d,  $J$  = 3.7 Hz, 1H), 7.57 (d,  $J$  = 7.6 Hz, 1H), 7.80 (d,  $J$  = 8.3 Hz, 2H), 8.46 (d,  $J$  = 8.2 Hz, 1H); <sup>13</sup>C{<sup>1</sup>H} NMR (100 MHz, CDCl<sub>3</sub>):  $\delta$  14.2 (t), 20.2 (t), 21.6 (q), 27.8 (q, 3C), 35.2 (t), 45.6 (t), 77.5 (s), 80.4 (s), 84.4 (s), 109.3 (d), 116.5 (d), 120.8 (d), 123.7 (d), 124.5 (d), 125.1 (d), 127.8 (d, 2C), 129.2 (d, 2C), 130.3 (s), 135.5 (s), 137.3 (s), 144.2 (s), 150.7 (s), 169.8 (s) ppm; HRMS (ESI) calcd for  $C_{27}H_{30}N_2O_5SNa$ : 517.1768 [M + Na]<sup>+</sup>; found 517.1758.

### Scheme S3. Synthesis of Alkyne **1u**

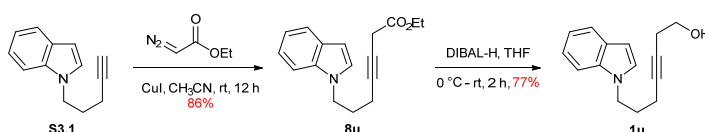

**Ethyl 7-(1H-indol-1-yl)hept-3-ynoate (8u):**<sup>6</sup> A solution of alkyne **S3.1**<sup>7</sup> (1 g, 5.46 mmol), ethyl diazoacetate (3.11 g, 27.28 mmol) and CuI (519 mg, 2.73 mmol) in CH<sub>3</sub>CN (30 mL) was stirred at rt for 12 h. After completion of reaction (indicated by TLC), the reaction mixture was filtered through celite and washed with EtOAc (30 mL X 2). The combined organic layer was washed with water (2 x 25 mL), brine (25 mL), dried (Na<sub>2</sub>SO<sub>4</sub>) and concentrated under reduced pressure. The crude was purified by column chromatography to afford alkyne **8u** (1.27 g, 86% yield) as a colourless liquid.  $R_f$  = 0.5 (10% ethyl acetate in petroleum ether); <sup>1</sup>H NMR (400 MHz, CDCl<sub>3</sub>):  $\delta$  1.20 (t,  $J$  = 7.1 Hz, 3H), 1.92 (quin,  $J$  = 6.6 Hz, 2H), 2.02–2.09 (m, 2H), 3.19 (t,  $J$  = 2.3 Hz, 2H), 4.12 (q,  $J$  = 7.1 Hz, 2H), 4.19 (t,  $J$  = 6.6 Hz, 2H), 6.39 (d,  $J$  = 3.0 Hz, 1H), 7.0 (t,  $J$  = 7.7 Hz, 1H), 7.05–7.14 (m, 2H), 7.29 (d,  $J$  = 8.1 Hz, 1H), 7.54 (d,  $J$  = 7.8 Hz, 1H); <sup>13</sup>C{<sup>1</sup>H} NMR (100 MHz, CDCl<sub>3</sub>):  $\delta$  14.1 (q), 16.0 (t), 26.0 (t), 28.7 (t), 44.6

(t), 61.4 (t), 73.1 (s), 82.1 (s), 100.9 (d), 109.3 (d), 119.2 (d), 120.8 (d), 121.3 (d), 128.1 (d), 128.6 (s), 135.8 (s), 168.7 (s) ppm; HRMS (ESI) calcd for  $C_{17}H_{20}N_2O_2$ : 270.1489 [M + H]<sup>+</sup>; found 270.1484.

#### General Procedure for Coupling of Indoles and Acid 5:<sup>8</sup>

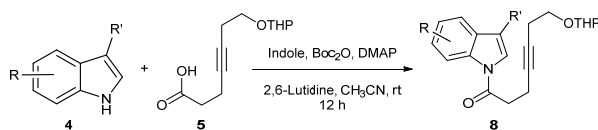

The coupling reactions are carried out employing the acid 0.5 (200 mg, 0.88 mmol) and used the corresponding indole in excess (2.21 mmol, 2.5 equiv). A representative coupling procedure as follows. To a solution of acid **5** (1 equiv) and indole **4** (2.5 equiv) in  $CH_3CN$  (5 mL) were added  $Boc_2O$  (2.5 equiv), DMAP (0.15 equiv), and 2,6-lutidine (0.5 equiv) sequentially at rt and the stirring was continued for additional 12 h. After completion of reaction as indicated by TLC, the reaction mixture was concentrated under reduced pressure and the crude was purified by column chromatography to afford THP protected alkynol **8**.

**1-(1H-indol-1-yl)-7-((tetrahydro-2H-pyran-2-yl)oxy)hept-4-yn-1-one (8a)**: Following the general procedure, the coupling of indole **4a** (258 mg, 2.21 mmol) and acid **5** (200 mg, 0.88 mmol) afforded compound **8a** (219 mg, 76%) as a colourless solid.  $R_f = 0.2$  (10% ethyl acetate in petroleum ether); mp: 88–90 °C;  $^1H$  NMR (400 MHz,  $CDCl_3$ ):  $\delta$  1.46–1.61 (m, 4H), 1.63–1.71 (m, 1H), 1.81 (dt,  $J = 13.0, 3.8$  Hz, 1H), 2.47 (tt,  $J = 7.1, 2.3$  Hz, 2H), 2.71 (tt,  $J = 7.2, 2.3$  Hz, 2H), 3.14 (dd,  $J = 8.1, 6.9$  Hz, 2H), 3.44–3.56 (dt,  $J = 9.6, 7.1$  Hz, 2H), 3.79 (dt,  $J = 9.6, 7.1$  Hz, 1H), 3.87 (td,  $J = 8.2, 3.0$  Hz, 1H), 4.62 (t,  $J = 3.0$  Hz, 1H), 6.66 (dd,  $J = 3.8, 0.4$  Hz, 1H), 7.28 (td,  $J = 7.4, 1.0$  Hz, 1H), 7.36 (td,  $J = 7.7, 1.2$  Hz, 1H), 7.47 (d,  $J = 3.7$  Hz, 1H), 7.57 (d,  $J = 7.7$  Hz, 1H), 8.47 (d,  $J = 8.2$  Hz, 1H);  $^{13}C\{^1H\}$  NMR (100 MHz,  $CDCl_3$ ):  $\delta$  14.3 (t), 19.4 (t), 20.2 (t), 25.4 (t), 30.5 (t), 35.4 (t), 62.2 (t), 65.9 (t), 78.2 (s), 79.0 (s), 98.8 (d), 109.3 (d), 116.6 (d), 120.8 (d), 123.7 (d), 124.4 (d), 125.2 (d), 130.3 (s), 135.6 (s), 169.7 (s) ppm; HRMS (ESI) calcd for  $C_{20}H_{23}NNaO_3$ : 348.1570 [M + Na]<sup>+</sup>; found 348.1560.

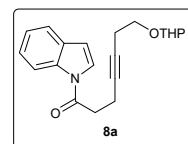

**1-(5-Methoxy-1H-indol-1-yl)-7-((tetrahydro-2H-pyran-2-yl)oxy)hept-4-yn-1-one (8b)**: Following the procedure, the coupling of indole **4b** (325 mg, 2.21 mmol) and acid **5** (200 mg, 0.88 mmol) afforded compound **8b** (213 mg, 67%) as a pale yellow solid.  $R_f = 0.2$  (30% ethyl acetate in petroleum ether); mp: 64–66 °C;  $^1H$  NMR (400 MHz,  $CDCl_3$ ):  $\delta$  1.44–1.58 (m, 4H), 1.71 (tt,  $J = 13.0, 3.6$  Hz, 1H), 1.78–1.87 (m, 1H), 2.46 (tt,  $J = 7.1, 2.3$  Hz, 2H), 2.69 (tt,  $J = 7.6, 2.3$  Hz, 2H), 3.11 (dd,  $J = 8.1, 6.6$  Hz, 2H), 3.46–3.55 (m, 2H), 3.79 (dt,  $J = 9.6, 7.1$  Hz, 1H), 3.84–3.91 (m, 4H), 4.62 (dd,  $J = 4.0, 3.0$  Hz, 1H), 6.59 (dd,  $J = 3.7, 0.6$  Hz, 1H), 6.96 (dd,  $J = 9.0, 2.5$  Hz, 1H), 7.03 (d,  $J = 2.5$  Hz, 1H), 7.44 (d,  $J = 3.7$  Hz, 1H), 8.35 (d,  $J = 8.8$  Hz, 1H);  $^{13}C\{^1H\}$  NMR (100 MHz,  $CDCl_3$ ):  $\delta$  14.3 (t), 19.4 (t), 20.2 (t), 25.4 (t), 30.6 (t), 35.1 (t), 55.6 (q), 62.3 (t), 65.9 (t), 78.2 (s), 79.1 (s), 98.8 (d), 103.6 (d), 109.2 (d), 113.5 (d), 117.3 (d), 125.0 (d), 130.3 (s), 131.3 (s), 156.5 (s), 169.33 (s) ppm; HRMS (ESI) calcd for  $C_{21}H_{25}NNaO_4$ : 378.1676 [M + Na]<sup>+</sup>; found 378.1660.

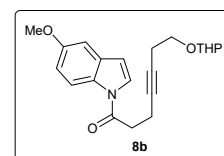

**1-(5-Methyl-1H-indol-1-yl)-7-((tetrahydro-2H-pyran-2-yl)oxy)hept-4-yn-1-one (8c)**: Following the general procedure, the coupling of indole **4c** (289 mg, 2.21 mmol) and acid **5** (200 mg, 0.88 mmol) afforded compound **8c** (199 mg, 66%) as a colourless liquid.  $R_f = 0.3$  (20% ethyl acetate in petroleum ether);  $^1H$  NMR (400 MHz,  $CDCl_3$ ):  $\delta$  1.45–1.59 (m, 4H), 1.66–1.75 (tt,  $J = 13.0, 3.1$  Hz, 1H), 1.82 (dd,  $J = 9.2, 3.6$  Hz, 1H), 2.45 (s, 3H), 2.46–2.49 (m, 2H), 2.70 (tt,  $J = 7.8, 2.2$  Hz, 2H), 3.12 (dd,  $J = 8.1, 6.6$  Hz, 2H), 3.52 (dt,  $J = 9.6, 7.1$  Hz, 2H), 3.79 (dt,  $J = 9.6, 7.1$  Hz, 1H), 3.85–3.90 (m, 1H), 4.62 (t,  $J = 3.1$  Hz, 1H), 6.59 (d,  $J = 3.7$  Hz, 1H), 7.18 (dd,  $J = 8.3, 1.2$  Hz, 1H), 7.36 (s, 1H), 7.44 (d,  $J = 3.7$  Hz, 1H), 8.32 (d,  $J = 8.3$  Hz, 1H);  $^{13}C\{^1H\}$  NMR (100

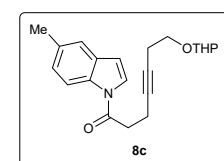

MHz, CDCl<sub>3</sub>):  $\delta$  14.3 (t), 19.5 (t), 20.2 (t), 21.3 (q), 25.4 (t), 30.5 (t), 35.3 (t), 62.3 (t), 66.0 (t), 78.2 (s), 79.1 (s), 98.8 (d), 109.1 (d), 116.2 (d), 120.8 (d), 124.4 (d), 126.5 (d), 130.6 (s), 133.3 (s), 133.8 (s), 169.5 (s) ppm; HRMS (ESI) calcd for C<sub>21</sub>H<sub>25</sub>NNaO<sub>3</sub>: 362.1727 [M + Na]<sup>+</sup>; found 362.1715.

**1-(5-Fluoro-1H-indol-1-yl)-7-((tetrahydro-2H-pyran-2-yl)oxy)hept-4-yn-1-one (8d):** Following the general procedure, the coupling of indole **4d** (298 mg, 2.21 mmol) and acid **5** (200 mg, 0.88 mmol) afforded **8d** (203 mg, 67%) as a colourless solid. R<sub>f</sub> = 0.5 (40% ethyl acetate in petroleum ether); mp: 68–70 °C; <sup>1</sup>H NMR (400 MHz, CDCl<sub>3</sub>):  $\delta$  1.48–1.56 (m, 4H), 1.70 (tt, *J* = 12.8, 3.1 Hz, 1H), 1.78–1.84 (m, 1H), 2.46 (tt, *J* = 7.2, 2.2 Hz, 1H), 2.70 (tt, *J* = 7.8, 2.2 Hz, 2H), 3.13 (dd, *J* = 7.0, 1.5 Hz, 2H), 3.47–3.54 (m, 2H), 3.71–3.82 (m, 2H), 3.87 (ddd, *J* = 11.1, 8.1, 3.2 Hz, 1H), 4.62 (t, *J* = 3.0 Hz, 1H), 6.63 (d, *J* = 3.7 Hz, 1H), 7.08 (td, *J* = 9.1, 2.6 Hz, 1H), 7.22 (dd, *J* = 8.6, 2.5 Hz, 1H), 7.52 (d, *J* = 3.7 Hz, 1H), 8.43 (dd, *J* = 9.0, 4.7 Hz, 1H); <sup>13</sup>C{<sup>1</sup>H} NMR (100 MHz, CDCl<sub>3</sub>):  $\delta$  14.3 (t), 19.5 (t), 20.2 (t), 25.4 (t), 30.6 (t), 35.1 (t), 62.3 (t), 65.9 (t), 78.4 (s), 78.9 (s), 98.8 (d), 106.3 (dd, *J*<sub>C-F</sub> = 24.4 Hz), 109.5 (dd, *J*<sub>C-F</sub> = 3.8 Hz), 112.9 (dd, *J*<sub>C-F</sub> = 25.1 Hz), 117.6 (dd, *J*<sub>C-F</sub> = 9.1 Hz), 125.9 (d), 131.3 (sd, *J*<sub>C-F</sub> = 9.9 Hz), 132.0 (s), 159.7 (sd, *J*<sub>C-F</sub> = 240.3 Hz), 169.5 (s); <sup>19</sup>F NMR (376 MHz, CDCl<sub>3</sub>):  $\delta$  -119.25 ppm; HRMS (ESI) calcd for C<sub>20</sub>H<sub>22</sub>NFNaO<sub>3</sub>: 366.1476 [M + Na]<sup>+</sup>; found 366.1462.

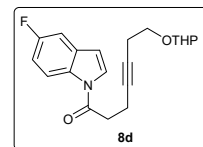

**1-(5-Chloro-1H-indol-1-yl)-7-((tetrahydro-2H-pyran-2-yl)oxy)hept-4-yn-1-one (8e):** Following the general procedure, the coupling of indole **4e** (335 mg, 2.21 mmol) and acid **5** (200 mg, 0.88 mmol) afforded compound **8e** (253 mg, 83%) as a colourless liquid. R<sub>f</sub> = 0.5 (30% ethyl acetate in petroleum ether); <sup>1</sup>H NMR (400 MHz, CDCl<sub>3</sub>):  $\delta$  1.48–1.60 (m, 4H), 1.69 (tt, *J* = 13.0, 3.1 Hz, 1H), 1.78–1.83 (m, 1H), 2.46 (tt, *J* = 7.1, 2.3 Hz, 2H), 2.70 (tt, *J* = 7.6, 2.3 Hz, 2H), 3.12 (dd, *J* = 8.0, 6.6 Hz, 2H), 3.46–3.55 (m, 2H), 3.78 (dt, *J* = 9.6, 7.1 Hz, 1H), 3.83–3.91 (m, 1H), 4.62 (dd, *J* = 2.8, 1.0 Hz, 1H), 6.60 (dd, *J* = 3.8, 0.6 Hz, 1H), 7.31 (dd, *J* = 8.7, 2.0 Hz, 1H), 7.49 (d, *J* = 3.7 Hz, 1H), 7.54 (d, *J* = 1.7 Hz, 1H), 8.40 (d, *J* = 8.8 Hz, 1H); <sup>13</sup>C{<sup>1</sup>H} NMR (100 MHz, CDCl<sub>3</sub>):  $\delta$  14.3 (t), 19.5 (t), 20.2 (t), 25.4 (t), 30.5 (t), 35.2 (t), 62.3 (t), 65.9 (t), 78.4 (s), 78.9 (s), 98.8 (d), 108.6 (d), 117.6 (d), 120.5 (d), 125.3 (d), 125.6 (d), 129.3 (s), 131.5 (s), 133.9 (s), 169.6 (s) ppm; HRMS (ESI) calcd for C<sub>20</sub>H<sub>22</sub>NCINaO<sub>3</sub>: 382.1180 [M + Na]<sup>+</sup>; found 382.1169.

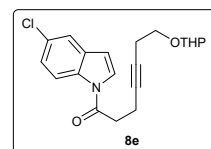

**1-(5-Bromo-1H-indol-1-yl)-7-((tetrahydro-2H-pyran-2-yl)oxy)hept-4-yn-1-one (8f):** Following the general procedure, the coupling of indole **4f** (433 mg, 2.21 mmol) and acid **5** (200 mg, 0.88 mmol) afforded compound **8f** (306 mg, 85%) as a colourless solid. R<sub>f</sub> = 0.5 (30% ethyl acetate in petroleum ether); mp: 78–80 °C; <sup>1</sup>H NMR (400 MHz, CDCl<sub>3</sub>):  $\delta$  1.48–1.60 (m, 4H), 1.70 (tt, *J* = 13.0, 3.1 Hz, 1H), 1.77–1.88 (m, 1H), 2.46 (tt, *J* = 7.1, 2.3 Hz, 2H), 2.65–2.75 (m, 2H), 3.12 (dd, *J* = 8.1, 6.6 Hz, 2H), 3.46–3.55 (m, 2H), 3.78 (dt, *J* = 9.7, 7.1 Hz, 1H), 3.83–3.92 (m, 1H), 4.61 (dd, *J* = 2.8, 1.3 Hz, 1H), 6.60 (dd, *J* = 3.8, 0.6 Hz, 1H), 7.45 (dd, *J* = 8.8, 2.0 Hz, 1H), 7.48 (d, *J* = 3.7 Hz, 1H), 7.70 (d, *J* = 1.7 Hz, 1H), 8.35 (d, *J* = 8.8 Hz, 1H); <sup>13</sup>C{<sup>1</sup>H} NMR (100 MHz, CDCl<sub>3</sub>):  $\delta$  14.3 (t), 19.5 (t), 20.2 (t), 25.4 (t), 30.5 (t), 35.2 (t), 62.3 (t), 65.9 (t), 78.4 (s), 78.8 (s), 98.8 (d), 108.4 (d), 117.0 (s), 118.0 (d), 123.5 (d), 125.5 (d), 128.0 (d), 132.0 (s), 134.3 (s), 169.6 (s) ppm; HRMS (ESI) calcd for C<sub>20</sub>H<sub>22</sub>NBrNaO<sub>3</sub>: 426.0675 [M + Na]<sup>+</sup>; found 426.0667.

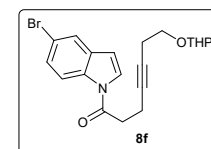

**1-(5-Iodo-1H-indol-1-yl)-7-((tetrahydro-2H-pyran-2-yl)oxy)hept-4-yn-1-one (8g):** Following the general procedure, the coupling of indole **4g** (537 mg, 2.21 mmol) and acid **5** (200 mg, 0.88 mmol) provided compound **8g** (245 mg, 61%) as a pale yellow liquid. R<sub>f</sub> = 0.3 (20% ethyl acetate in petroleum ether); <sup>1</sup>H NMR (400 MHz, CDCl<sub>3</sub>):  $\delta$  1.48–1.57 (m, 4H), 1.66–1.74 (m, 1H), 1.77–1.85 (m, 1H), 2.46 (tt, *J* = 7.1, 2.2 Hz, 2H), 2.67–2.73 (m, 2H), 3.12 (t, *J* = 7.3 Hz, 2H), 3.46–3.55 (m, 2H), 3.77 (td, *J* = 9.6, 2.5 Hz, 1H), 3.82–3.91 (m, 1H), 4.61 (t, *J* = 3.0 Hz, 1H), 6.59 (d, *J* = 3.7 Hz, 1H), 7.45 (d, *J* = 3.7 Hz, 1H), 7.63 (dd, *J* = 8.6, 1.6 Hz, 1H), 7.92 (d, *J* = 1.6 Hz, 1H), 8.24 (d, *J* = 8.7 Hz, 1H); <sup>13</sup>C{<sup>1</sup>H} NMR (100 MHz, CDCl<sub>3</sub>):  $\delta$  14.3 (t), 19.5 (t), 20.2 (t), 25.4 (t), 30.5 (t), 35.3

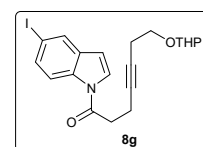

(t), 62.3 (t), 65.9 (t), 78.4 (s), 78.8 (s), 87.9 (s), 98.8 (d), 108.2 (d), 118.4 (d), 125.1 (d), 129.7 (d), 132.6 (s), 133.7 (d), 134.9 (s), 169.7 (s) ppm; HRMS (ESI) calcd for C<sub>20</sub>H<sub>22</sub>N<sub>2</sub>NaO<sub>3</sub>: 474.0537 [M + Na]<sup>+</sup>; found 474.0521.

**1-(5-Nitro-1H-indol-1-yl)-7-((tetrahydro-2H-pyran-2-yl)oxy)hept-4-yn-1-one (8h):** Following the general procedure, the coupling of indole **4h** (358 mg, 2.21 mmol) and acid **5** (200 mg, 0.88 mmol) gave compound **8h** (197 mg, 60%) as a yellow solid. *R*<sub>f</sub> = 0.3 (40% ethyl acetate in petroleum ether); mp: 80 °C; <sup>1</sup>H NMR (400 MHz, CDCl<sub>3</sub>): δ 1.46–1.59 (m, 4H), 1.70 (tt, *J* = 12.88, 3.50 Hz, 1H), 1.76–1.87 (m, 1H), 2.46 (tt, *J* = 7.13, 2.38 Hz, 2H), 2.73 (tt, *J* = 7.63, 2.38 Hz, 2H), 3.18 (dd, *J* = 7.88, 6.63 Hz, 2H), 3.51 (dt, *J* = 9.76, 7.13 Hz, 2H), 3.78 (dt, *J* = 9.69, 7.16 Hz, 1H), 3.87 (ddd, *J* = 11.29, 8.10, 3.25 Hz, 1H), 4.62 (dd, *J* = 2.88, 1.21 Hz, 1H), 6.82 (dd, *J* = 3.88, 0.63 Hz, 1H), 7.65 (d, *J* = 3.88 Hz, 1H), 8.25 (dd, *J* = 9.19, 2.31 Hz, 1H), 8.50 (d, *J* = 2.13 Hz, 1H), 8.60 (d, *J* = 9.13 Hz, 1H); <sup>13</sup>C{<sup>1</sup>H} NMR (100 MHz, CDCl<sub>3</sub>): δ 14.2 (t), 19.5 (t), 20.16 (t), 25.4 (t), 30.5 (t), 35.4 (t), 62.3 (t), 65.9 (t), 78.5 (s), 78.7 (s), 98.8 (d), 109.7 (d), 116.8 (d), 117.1 (d), 120.5 (d), 127.2 (d), 130.2 (s), 138.6 (s), 144.3 (s), 169.9 (s) ppm; HRMS (ESI) calcd for C<sub>20</sub>H<sub>22</sub>N<sub>2</sub>NaO<sub>3</sub>: 393.1421 [M + Na]<sup>+</sup>; found 393.1411.

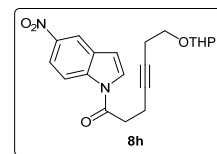

**1-(6-Fluoro-1H-indol-1-yl)-7-((tetrahydro-2H-pyran-2-yl)oxy)hept-4-yn-1-one (8i):** Following the general procedure, the coupling of indole **4i** (298 mg, 2.21) and acid **5** (200 mg, 0.88 mmol) provided compound **8i** (167 mg, 55%) as a colourless syrup. *R*<sub>f</sub> = 0.2 (10% ethyl acetate in petroleum ether); <sup>1</sup>H NMR (400 MHz, CDCl<sub>3</sub>): δ 1.48–1.60 (m, 4H), 1.71 (tt, *J* = 13.0, 3.2 Hz, 1H), 1.77–1.85 (m, 1H), 2.46 (tt, *J* = 7.1, 2.3 Hz, 2H), 2.70 (ddt, *J* = 8.3, 6.3, 2.3 Hz, 2H), 3.12 (dd, *J* = 8.1, 6.6 Hz, 2H), 3.47–3.54 (m, 2H), 3.79 (dt, *J* = 9.6, 7.1 Hz, 1H), 3.87 (ddd, *J* = 11.1, 8.0, 3.1 Hz, 1H), 4.62 (t, *J* = 3.0 Hz, 1H), 6.62 (d, *J* = 3.8 Hz, 1H), 7.03 (td, *J* = 8.8, 2.3 Hz, 1H), 7.44–7.50 (m, 2H), 8.22 (dd, *J* = 10.3, 2.1 Hz, 1H); <sup>13</sup>C{<sup>1</sup>H} NMR (100 MHz, CDCl<sub>3</sub>): δ 14.2 (t), 19.5 (t), 20.2 (t), 25.4 (t), 30.5 (t), 35.2 (t), 62.3 (t), 65.9 (t), 78.4 (s), 78.9 (s), 98.8 (d), 104.0 (dd, *J*<sub>C-F</sub> = 28.9 Hz), 109.0 (d), 111.9 (dd, *J*<sub>C-F</sub> = 24.4 Hz), 121.3 (dd, *J*<sub>C-F</sub> = 9.9 Hz), 124.6 (dd, *J*<sub>C-F</sub> = 3.8 Hz), 126.5 (s), 135.7 (sd, *J*<sub>C-F</sub> = 12.9 Hz), 161.3 (sd, *J*<sub>C-F</sub> = 241.0 Hz), 169.8 (s); <sup>19</sup>F NMR (376 MHz, CDCl<sub>3</sub>): δ -116.35 ppm; HRMS (ESI) calcd for C<sub>20</sub>H<sub>22</sub>NFNaO<sub>3</sub>: 366.1476 [M + Na]<sup>+</sup>; found 366.1467.

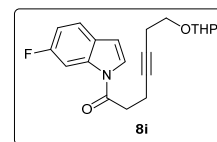

**1-(6-Chloro-1H-indol-1-yl)-7-((tetrahydro-2H-pyran-2-yl)oxy)hept-4-yn-1-one (8j):** Following the general procedure, the coupling of indole **4j** (335 mg, 2.21 mmol) and acid **5** (200 mg, 0.88 mmol) gave compound **8j** (217 mg, 68%) as a pale yellow liquid. *R*<sub>f</sub> = 0.4 (10% ethyl acetate in petroleum ether); <sup>1</sup>H NMR (400 MHz, CDCl<sub>3</sub>): δ 1.45–1.62 (m, 4H), 1.63–1.74 (m, 1H), 1.76–1.87 (m, 1H), 2.46 (tt, *J* = 7.1, 2.3 Hz, 2H), 2.70 (tt, *J* = 7.7, 2.2 Hz, 2H), 3.11 (t, *J* = 7.3 Hz, 2H), 3.52 (dt, *J* = 9.7, 7.1 Hz, 2H), 3.78 (dt, *J* = 9.6, 7.1 Hz, 1H), 3.87 (ddd, *J* = 11.1, 8.0, 3.2 Hz, 1H), 4.58–4.65 (m, 1H), 6.62 (d, *J* = 3.8 Hz, 1H), 7.22–7.30 (m, 1H), 7.42–7.50 (m, 2H), 8.53 (s, 1H); <sup>13</sup>C{<sup>1</sup>H} NMR (100 MHz, CDCl<sub>3</sub>): δ 14.3 (t), 19.4 (t), 20.2 (t), 25.4 (t), 30.5 (t), 35.3 (t), 62.3 (t), 65.9 (t), 78.4 (s), 78.8 (s), 98.8 (d), 109.0 (d), 116.9 (d), 121.4 (d), 124.3 (d), 124.9 (d), 128.7 (s), 131.1 (s), 135.9 (s), 169.7 (s) ppm; HRMS (ESI) calcd for C<sub>20</sub>H<sub>22</sub>NCINaO<sub>3</sub>: 382.1180 [M + Na]<sup>+</sup>; found 382.1185.

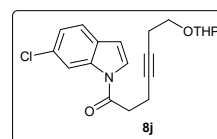

**1-(6-Bromo-1H-indol-1-yl)-7-((tetrahydro-2H-pyran-2-yl)oxy)hept-4-yn-1-one (8k):** Following the procedure, the coupling of indole **4k** (433 mg, 2.21 mmol) and acid **5** (200 mg, 0.88 mmol) gave compound **8k** (201 mg, 56%) as a colourless syrup. *R*<sub>f</sub> = 0.2 (10% ethyl acetate in petroleum ether); <sup>1</sup>H NMR (400 MHz, CDCl<sub>3</sub>): δ 1.48–1.60 (m, 4H), 1.740 (tt, *J* = 12.8, 3.2 Hz, 1H), 1.768–1.86 (m, 1H), 2.46 (tt, *J* = 7.1, 2.2 Hz, 2H), 2.69 (tt, *J* = 7.3, 2.3 Hz, 2H), 3.11 (t, *J* = 7.3 Hz, 2H), 3.44–3.56 (m, 2H), 3.78 (dt, *J* = 9.6, 7.1 Hz, 1H), 3.87 (ddd, *J* = 11.1, 8.0, 3.1 Hz, 1H), 4.62 (t, *J* = 3.0 Hz, 1H), 6.62 (d, *J* = 3.8 Hz, 1H), 7.36–7.42 (m, 2H), 7.43 (d, *J* = 3.7 Hz, 1H), 8.70 (s, 1H); <sup>13</sup>C{<sup>1</sup>H} NMR (100 MHz, CDCl<sub>3</sub>): δ 14.2 (t), 19.4 (t), 20.2 (t), 25.4 (t), 30.5 (t), 35.2 (t), 62.3 (t), 65.9 (t), 78.4 (s), 78.8 (s), 98.8 (d), 109.0 (d), 118.9 (s), 119.7 (d), 121.8 (d), 124.8 (d), 127.0 (d), 129.1 (s), 136.2 (s), 169.7 (s) ppm; HRMS (ESI) calcd for C<sub>20</sub>H<sub>22</sub>NBrNaO<sub>3</sub>: 426.0675 [M + Na]<sup>+</sup>; found 426.0663.

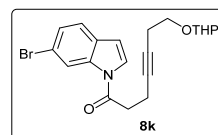

**1-(4-Bromo-1H-indol-1-yl)-7-((tetrahydro-2H-pyran-2-yl)oxy)hept-4-yn-1-one (8l):** Prepared by following procedure of coupling indole **4l** (433 mg, 2.21 mmol) and acid **5** (200 mg, 0.88 mmol) afforded compound **8l** as colourless sticky liquid (210 mg, 58%);  $R_f = 0.2$  (10% ethyl acetate in petroleum ether);  $^1\text{H NMR}$  (400 MHz,  $\text{CDCl}_3$ ):  $\delta$  1.48–1.55 (m, 4H), 1.71 (tt,  $J = 12.8, 3.2$  Hz, 1H), 1.83 (dd,  $J = 9.8, 3.1$  Hz, 1H), 2.47 (tt,  $J = 7.1, 2.3$  Hz, 2H), 2.72 (ddt,  $J = 8.3, 6.3, 2.3$  Hz, 2H), 3.15 (dd,  $J = 8.0, 6.6$  Hz, 2H), 3.46–3.56 (m, 2H), 3.80 (dt,  $J = 9.6, 7.1$  Hz, 1H), 3.84–3.94 (m, 1H), 4.62 (dd,  $J = 4.0, 3.0$  Hz, 1H), 6.73 (d,  $J = 3.8$  Hz, 1H), 7.22 (t,  $J = 8.0$  Hz, 1H), 7.45 (dd,  $J = 7.7, 0.5$  Hz, 1H), 7.54 (d,  $J = 3.7$  Hz, 1H), 8.44 (d,  $J = 8.3$  Hz, 1H);  $^{13}\text{C}\{^1\text{H}\}$  NMR (100 MHz,  $\text{CDCl}_3$ ):  $\delta$  14.3 (t), 19.5 (t), 20.2 (t), 25.4 (t), 30.5 (t), 35.4 (t), 62.3 (t), 65.9 (t), 78.4 (s), 78.8 (s), 98.8 (d), 109.1 (d), 114.6 (s), 115.6 (d), 124.9 (d), 126.2 (d), 126.7 (d), 131.0 (s), 135.9 (s), 169.8 (s) ppm; HRMS (ESI) calcd for  $\text{C}_{20}\text{H}_{22}\text{NBrNaO}_3$ : 426.0675  $[\text{M} + \text{Na}]^+$ ; found 426.0666.

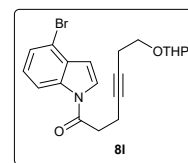

**1-(7-Methyl-1H-indol-1-yl)-7-((tetrahydro-2H-pyran-2-yl)oxy)hept-4-yn-1-one (8m):** Following the general procedure, the coupling of indole **4m** (290 mg, 2.21 mmol) and acid **5** (200 mg, 0.88 mmol) afforded compound **8m** (107 mg, 35%) as a colourless oil;  $R_f = 0.3$  (10% ethyl acetate in petroleum ether);  $^1\text{H NMR}$  (400 MHz,  $\text{CDCl}_3$ ):  $\delta$  1.49–1.57 (m, 4H), 1.70 (tt,  $J = 9.8, 3.1$  Hz, 1H), 1.81 (dd,  $J = 9.1, 3.5$  Hz, 1H), 2.46 (tt,  $J = 7.2, 2.3$  Hz, 2H), 2.56 (s, 3H), 2.71 (tt,  $J = 7.9, 2.3$  Hz, 2H), 3.15 (t,  $J = 7.2$  Hz, 2H), 3.4–3.54 (m, 2H), 3.78 (dt,  $J = 9.6, 7.1$  Hz, 1H), 3.86 (ddd,  $J = 11.1, 7.8, 3.1$  Hz, 1H), 4.6 (dd,  $J = 3.0, 1.5$  Hz, 1H), 6.65 (d,  $J = 3.8$  Hz, 1H), 7.15 (d,  $J = 7.3$  Hz, 1H), 7.21 (t,  $J = 7.5$  Hz, 1H), 7.41 (d,  $J = 7.3$  Hz, 1H), 7.44 (d,  $J = 3.7$  Hz, 1H);  $^{13}\text{C}\{^1\text{H}\}$  NMR (100 MHz,  $\text{CDCl}_3$ ):  $\delta$  15.1 (t), 19.4 (t), 20.15 (t), 22.6 (q), 25.4 (t), 30.5 (t), 36.1 (t), 62.3 (t), 65.9 (t), 78.4 (s), 79.0 (s), 98.8 (d), 109.2 (d), 118.5 (d), 124.1 (d), 125.7 (d), 126.7 (s), 128.2 (d), 131.9 (s), 135.1 (s), 169.2 (s) ppm; HRMS (ESI) calcd for  $\text{C}_{21}\text{H}_{25}\text{NNaO}_3$ : 362.1727  $[\text{M} + \text{Na}]^+$ ; found 362.1717.

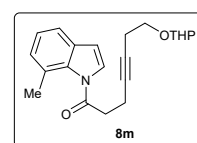

**1-(3-Methyl-1H-indol-1-yl)-7-((tetrahydro-2H-pyran-2-yl)oxy)hept-4-yn-1-one (8n):** Following the general procedure, coupling of indole **4n** (290 mg, 2.21 mmol) and acid **5** (200 mg, 0.88 mmol) afforded compound **8n** (183 mg, 61%) as a colourless syrup.  $R_f = 0.8$  (30% ethyl acetate in petroleum ether);  $^1\text{H NMR}$  (400 MHz,  $\text{CDCl}_3$ ):  $\delta$  1.48–1.52 (m, 4H), 1.70 (tt,  $J = 12.8, 3.2$  Hz, 1H), 1.78–1.87 (m, 1H), 2.29 (d,  $J = 1.2$  Hz, 3H), 2.47 (tt,  $J = 7.1, 2.3$  Hz, 2H), 2.69 (tt,  $J = 7.4, 2.3$  Hz, 2H), 3.09 (dd,  $J = 8.3, 6.6$  Hz, 2H), 3.46–3.56 (m, 2H), 3.80 (ddd,  $J = 9.6, 7.2, 2.3$  Hz, 1H), 3.88 (ddd,  $J = 11.1, 8.0, 3.1$  Hz, 1H), 4.62 (t,  $J = 3.1$  Hz, 1H), 7.23 (s, 1H), 7.30 (td,  $J = 7.4, 1.1$  Hz, 1H), 7.36 (td,  $J = 7.6, 1.3$  Hz, 1H), 7.50 (dd,  $J = 7.6, 0.6$  Hz, 1H), 8.44 (d,  $J = 7.7$  Hz, 1H);  $^{13}\text{C}\{^1\text{H}\}$  NMR (100 MHz,  $\text{CDCl}_3$ ):  $\delta$  9.7 (q), 14.3 (d), 19.4 (d), 20.2 (d), 25.4 (d), 30.5 (d), 35.4 (d), 62.2 (d), 65.9 (d), 78.1 (s), 79.2 (s), 98.7 (d), 116.6 (d), 118.6 (s), 118.8 (d), 121.3 (d), 123.4 (d), 125.2 (d), 131.3 (s), 135.8 (s), 169.3 (s) ppm; HRMS (ESI) calcd for  $\text{C}_{21}\text{H}_{25}\text{NNaO}_3$ : 362.1737  $[\text{M} + \text{Na}]^+$ ; found 362.1718.

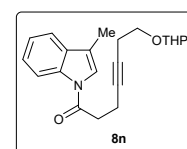

**1-(3-Acetyl-1H-indol-1-yl)-7-((tetrahydro-2H-pyran-2-yl)oxy)hept-4-yn-1-one (8o):** Following the general procedure, the coupling of indole **4o** (351 mg, 2.21 mmol) and acid **5** (200 mg, 0.88 mmol) gave the compound **8o** (179 mg, 55%) as a pale yellow oil.  $R_f = 0.6$  (40% ethyl acetate in petroleum ether);  $^1\text{H NMR}$  (400 MHz,  $\text{CDCl}_3$ ):  $\delta$  1.46–1.60 (m, 4H), 1.69 (dt,  $J = 8.7, 3.3$  Hz, 1H), 1.75–1.85 (m, 1H), 2.46 (tt,  $J = 7.1, 2.3$  Hz, 2H), 2.58 (s, 3H), 2.73 (tt,  $J = 7.6, 2.3$  Hz, 2H), 3.19 (dd,  $J = 8.0, 6.6$  Hz, 2H), 3.50 (dt,  $J = 9.6, 7.1$  Hz, 2H), 3.79 (dt,  $J = 9.7, 7.1$  Hz, 1H), 3.86 (ddd,  $J = 11.2, 8.0, 3.2$  Hz, 1H), 4.56–4.64 (dd,  $J = 2.8, 1.5$  Hz, 1H), 7.36–7.46 (m, 2H), 8.07 (s, 1H), 8.34 (ddd,  $J = 6.3, 2.6, 0.6$  Hz, 1H), 8.39 (ddd,  $J = 7.0, 2.6, 0.6$  Hz, 1H);  $^{13}\text{C}\{^1\text{H}\}$  NMR (100 MHz,  $\text{CDCl}_3$ ):  $\delta$  14.2 (t), 19.4 (t), 20.14 (t), 25.3 (t), 27.9 (q), 30.5 (t), 35.4 (t), 62.3 (t), 65.9 (t), 78.6 (s), 78.7 (s), 98.8 (d), 116.1 (d), 121.9 (s), 122.5 (d), 125.2 (d), 126.3 (d), 127.1 (s), 130.4 (d), 136.0 (s), 169.9 (s), 193.6 (s) ppm; HRMS (ESI) calcd for  $\text{C}_{22}\text{H}_{25}\text{NNaO}_4$ : 390.1676  $[\text{M} + \text{Na}]^+$ ; found 390.1663.

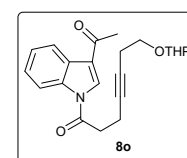



**Methyl 2-(1-(7-((tetrahydro-2H-pyran-2-yl)oxy)hept-4-ynoyl)-1H-indol-3-yl)acetate (8p):** Following the procedure, the coupling of indole **4p** (418 mg, 2.21 mmol) and acid **5** (200 mg, 0.88 mmol) afforded compound **8p** (162 mg, 46%) as a colourless syrup.  $R_f = 0.3$  (10% ethyl acetate in petroleum ether);  $^1\text{H NMR}$  (400 MHz,  $\text{CDCl}_3$ ):  $\delta$  1.45–1.62 (m, 5H), 1.67–1.69 (m, 1H), 1.69–1.74 (m, 1H), 1.77–1.86 (m, 1H), 2.46 (tt,  $J = 7.1, 2.3$  Hz, 2H), 2.66–2.73 (m, 2H), 3.13 (dd,  $J = 8.2, 6.6$  Hz, 2H), 3.47–3.55 (m, 2H), 3.74 (s, 3H), 3.78 (dt,  $J = 9.7, 7.2$  Hz, 1H), 3.87 (ddd,  $J = 11.2, 8.0, 3.2$  Hz, 1H), 4.62 (t,  $J = 2.8$  Hz, 1H), 7.31 (td,  $J = 7.4, 1.0$  Hz, 1H), 7.38 (td,  $J = 7.7, 1.3$  Hz, 1H), 7.49–7.55 (m, 2H), 8.45 (d,  $J = 8.1$  Hz, 1H);  $^{13}\text{C}\{^1\text{H}\}$  NMR (100 MHz,  $\text{CDCl}_3$ ):  $\delta$  14.2 (t), 19.4 (t), 20.2 (t), 25.4 (t), 30.5 (t), 30.7 (t), 35.3 (t), 52.2 (q), 62.2 (t), 65.9 (t), 78.2 (s), 79.0 (s), 98.7 (d), 115.1 (s), 116.7 (d), 118.8 (d), 122.9 (d), 123.7 (d), 125.5 (d), 129.9 (s), 135.7 (s), 169.5 (s), 171.2 (s) ppm; HRMS (ESI) calcd for  $\text{C}_{23}\text{H}_{27}\text{NNaO}_5$ : 420.1781 [M + Na] $^+$ ; found 420.1778.

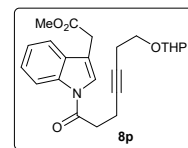

**1-(1H-Pyrrol-1-yl)-7-((tetrahydro-2H-pyran-2-yl)oxy)hept-4-yn-1-one (8q):** Following the procedure, the coupling of pyrrole **4q** (148 mg, 2.21 mmol) and acid **5** (200 mg, 0.88 mmol) gave compound **8q** (80 mg, 33%) as a colourless syrup.  $R_f = 0.6$  (30% ethyl acetate in petroleum ether);  $^1\text{H NMR}$  (400 MHz,  $\text{CDCl}_3$ ):  $\delta$  1.45–1.65 (m, 4H), 1.65–1.75 (m, 1H), 1.76–1.89 (m, 1H), 2.45 (tt,  $J = 7.1, 2.3$  Hz, 2H), 2.64 (ddt,  $J = 8.4, 6.4, 2.3$  Hz, 2H), 3.04 (dd,  $J = 8.1, 6.6$  Hz, 2H), 3.45–3.57 (m, 2H), 3.78 (dt,  $J = 9.6, 7.1$  Hz, 1H), 3.87 (tt,  $J = 8.3, 3.0$  Hz, 1H), 4.60–4.65 (m, 1H), 6.30 (t,  $J = 2.3$  Hz, 2H), 7.32 (br. s., 2H);  $^{13}\text{C}\{^1\text{H}\}$  NMR (100 MHz,  $\text{CDCl}_3$ ):  $\delta$  14.1 (t), 19.4 (t), 20.1 (t), 25.4 (t), 30.5 (t), 34.2 (t), 62.2 (t), 65.9 (t), 78.2 (s), 78.8 (s), 98.7 (d), 113.2 (d, 2C), 118.9 (d, 2C), 168.9 (s) ppm; HRMS (ESI) calcd for  $\text{C}_{16}\text{H}_{21}\text{N Na O}_3$ : 298.1414 [M + Na] $^+$ ; found 298.1406.

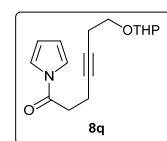

**1-(1H-Indol-1-yl)-7-((tetrahydro-2H-pyran-2-yl)oxy)oct-4-yn-1-one (8r):** Following the procedure, the coupling of indole **4a** (244 mg, 2.08 mmol) and acid **5b** (200 mg, 0.83 mmol) gave compound **8r** (198 mg, 70%) as a colourless oil;  $R_f = 0.5$  (10% ethyl acetate in petroleum ether);  $^1\text{H NMR}$  (500 MHz,  $\text{CDCl}_3$ ):  $\delta$  1.23 (d,  $J = 6.1$  Hz, 3H), 1.31 (d,  $J = 6.4$  Hz, 2.85H), 1.47–1.61 (m, 8H), 1.68–1.76 (m, 3H), 1.78–1.89 (m, 2H), 2.26–2.33 (m, 1.5H), 2.35–2.45 (m, 1.5H), 2.53–2.57 (m, 1H), 2.73 (tt,  $J = 8.6, 2.5$  Hz, 3.8H), 3.16 (td,  $J = 7.3, 3.6$  Hz, 3.7H), 3.46–3.55 (m, 1.95H), 3.85–4.00 (m, 3.79H), 4.71–4.76 (m, 1.87H), 6.68 (d,  $J = 3.8$  Hz, 1.79H), 7.30 (t,  $J = 7.6$  Hz, 2H), 7.38 (7.6 Hz, 1.82H), 7.49 (m, 1.76H), 7.59 (d,  $J = 7.6$  Hz, 1.77H), 8.48 (d,  $J = 8.3$  Hz, 1.75H);  $^{13}\text{C}\{^1\text{H}\}$  NMR (125 MHz,  $\text{CDCl}_3$ ):  $\delta$  14.3 (t), 14.4 (t), 19.0 (q), 19.5 (t), 19.8 (t), 21.1 (q), 25.4 (t), 25.5 (t), 26.1 (t), 27.5 (t), 30.9 (t), 31.0 (t), 35.4 (t), 62.4 (t), 62.7 (t), 71.0 (d), 71.4 (d), 78.2 (s), 78.5 (s), 79.5 (s), 96.7 (d), 97.8 (d), 109.3 (d), 116.6 (d), 120.8 (d), 123.7 (d), 124.4 (d), 125.2 (d), 130.3 (s), 135.6 (s), 169.7 (s), 169.7 (s) ppm; HRMS (ESI) calcd for  $\text{C}_{21}\text{H}_{25}\text{N Na O}_3$ : 362.1727 [M + Na] $^+$ ; found 362.1720.

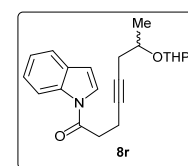

**1-(1H-Indol-1-yl)-8-((tetrahydro-2H-pyran-2-yl)oxy)oct-4-yn-1-one (8s):** Following the procedure, the coupling of indole **4a** (244 mg, 2.08 mmol) and acid **5a** (200 mg, 0.83 mmol) gave compound **8s** (117 mg, 41%) as a colourless oil.  $R_f = 0.5$  (10% ethyl acetate in petroleum ether);  $^1\text{H NMR}$  (400 MHz,  $\text{CDCl}_3$ ):  $\delta$  1.45–1.61 (m, 4H), 1.66–1.85 (m, 4H), 2.22–2.31 (m, 2H), 2.70 (tt,  $J = 7.8, 2.3$  Hz, 2H), 3.14 (dd,  $J = 8.2, 6.6$  Hz, 2H), 3.41–3.53 (m, 2H), 3.79 (dt,  $J = 9.7, 3.3$  Hz, 1H), 3.6 (tt,  $J = 11.2, 3.2$  Hz, 1H), 4.57 (t,  $J = 3.4$  Hz, 1H), 6.66 (d,  $J = 3.7$  Hz, 1H), 7.24–7.32 (m, 1H), 7.33–7.40 (m, 1H), 7.48 (d,  $J = 3.8$  Hz, 1H), 7.57 (d,  $J = 7.6$  Hz, 1H), 8.47 (d,  $J = 8.2$  Hz, 1H);  $^{13}\text{C}\{^1\text{H}\}$  NMR (100 MHz,  $\text{CDCl}_3$ ):  $\delta$  14.3 (t), 15.6 (t), 19.5 (t), 25.4 (t), 29.0 (t), 30.7 (t), 35.5 (t), 62.2 (t), 66.0 (t), 78.2 (s), 80.9 (s), 98.8 (d), 109.3 (d), 116.6 (d), 120.8 (d), 123.7 (d), 124.4 (d), 125.2 (d), 130.3 (s), 135.6 (s), 169.8 (s) ppm; HRMS (ESI) calcd for  $\text{C}_{21}\text{H}_{25}\text{N Na O}_3$ : 362.1727 [M + Na] $^+$ ; found 362.1717.

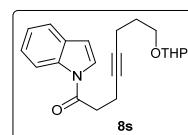

**1-(1*H*-Indol-1-yl)-3-(2-methoxytetrahydrofuran-2-yl)propan-1-one (9a):** Cyclization of alkynol **1a** (30 mg, 0.12 mmol) in the presence of methanol (10  $\mu$ L, 0.24 mmol) provided compound **9a** (22.5 mg, 66%) as a colourless syrup.  $R_f = 0.5$  (20% ethyl acetate in petroleum ether);  $^1\text{H NMR}$  (400 MHz,  $\text{CDCl}_3$ ):  $\delta$  1.68–1.73 (m, 1H), 1.81–1.91 (m, 1H), 1.92–2.02 (m, 2H), 2.11 (ddd,  $J = 6.7, 14.3, 9.0$  Hz, 1H), 2.32 (ddd,  $J = 14.5, 8.9, 7.0$  Hz, 1H), 2.92–2.96 (m, 2H), 3.15 (s, 3H), 3.81–3.90 (m, 2H), 6.56 (dd,  $J = 3.9, 0.5$  Hz, 1H), 7.20 (td,  $J = 7.5, 1.1$  Hz, 1H), 7.28 (td,  $J = 7.7, 1.3$  Hz, 1H), 7.44 (d,  $J = 3.8$  Hz, 1H), 7.49 (d,  $J = 7.7$  Hz, 1H), 8.39 (d,  $J = 8.2$  Hz, 1H);  $^{13}\text{C}\{^1\text{H}\}$  NMR (100 MHz,  $\text{CDCl}_3$ ):  $\delta$  24.5 (t), 29.8 (t), 31.2 (t), 35.0 (t), 48.4 (q), 67.9 (t), 108.7 (s), 109.1 (d), 116.6 (d), 120.8 (d), 123.6 (d), 124.7 (d), 125.1 (d), 130.3 (s), 135.6 (s), 171.2 (s) ppm; HRMS (ESI) calcd for  $\text{C}_{16}\text{H}_{19}\text{NNaO}_3$ : 296.1257 [M + Na] $^+$ ; found 296.1252.

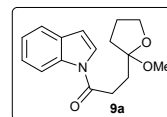

**3-(2-Allyltetrahydrofuran-2-yl)-1-(1*H*-indol-1-yl)propan-1-one (10a):** Cyclization of alkynol **1a** (30 mg, 0.12 mmol) in the presence of trimethylallyl silane (0.2 mL, 1.2 mmol) gave compound **10a** (22.2 mg, 63%) as a colourless liquid.  $R_f = 0.8$  (40% ethyl acetate in petroleum ether);  $^1\text{H NMR}$  (400 MHz,  $\text{CDCl}_3$ ):  $\delta$  1.73 (dt,  $J = 12.5, 6.6$  Hz, 1H), 1.84–1.92 (m, 1H), 1.92–2.00 (m, 2H), 2.05 (t,  $J = 8.0$  Hz, 2H), 2.30–2.41 (m, 2H), 3.02 (dt,  $J = 13.3, 7.8$  Hz, 2H), 3.87 (t,  $J = 6.6$  Hz, 2H), 5.08–5.19 (m, 2H), 5.83 (ddt,  $J = 17.1, 10.1, 7.2$  Hz, 1H), 6.65 (dd,  $J = 3.7, 0.6$  Hz, 1H), 7.24–7.31 (m, 1H), 7.36 (td,  $J = 7.7, 1.3$  Hz, 1H), 7.49–7.60 (m, 2H), 8.47 (d,  $J = 8.2$  Hz, 1H);  $^{13}\text{C}\{^1\text{H}\}$  NMR (100 MHz,  $\text{CDCl}_3$ ):  $\delta$  26.4 (t), 31.1 (t), 33.6 (t), 35.1 (t), 43.7 (t), 68.1 (t), 83.8 (s), 109.4 (d), 116.9 (d), 118.4 (t), 121.1 (d), 123.9 (d), 125.1 (d), 125.4 (d), 130.7 (s), 134.5 (d), 135.9 (s), 172.1 (s) ppm; HRMS (ESI) calcd for  $\text{C}_{18}\text{H}_{21}\text{NNaO}_2$ : 306.1465 [M + Na] $^+$ ; found 306.1472.

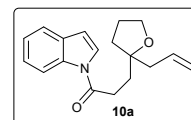

**3-(2-(1*H*-Indol-3-yl)tetrahydrofuran-2-yl)-1-(1*H*-indol-1-yl)propan-1-one (11a):** Cyclization of alkynol **1a** (30 mg, 0.12 mmol) in the presence of indole **4a** (15 mg, 0.13 mmol) gave compound **11a** as colourless syrup (32.1 mg, 72%);  $R_f = 0.7$  (40% ethyl acetate in petroleum ether);  $^1\text{H NMR}$  (400 MHz,  $\text{CDCl}_3$ ):  $\delta$  1.89–2.00 (m, 1H), 2.00–2.11 (m, 1H), 2.22 (dt,  $J = 12.0, 7.8$  Hz, 1H), 2.39–2.48 (m, 2H), 2.59–2.74 (m, 2H), 3.10 (tt,  $J = 12.0, 5.0$  Hz, 1H), 3.97–4.06 (m, 2H), 6.51 (dd,  $J = 3.7, 0.5$  Hz, 1H), 7.11–7.16 (m, 1H), 7.18 (d,  $J = 2.3$  Hz, 1H), 7.19–7.26 (m, 2H), 7.27–7.33 (m, 2H), 7.35–7.40 (m, 1H), 7.48–7.54 (m, 1H), 7.71 (d,  $J = 8.0$  Hz, 1H), 8.07 (br. s., 1H), 8.38 (d,  $J = 8.1$  Hz, 1H);  $^{13}\text{C}\{^1\text{H}\}$  NMR (100 MHz,  $\text{CDCl}_3$ ):  $\delta$  25.9 (t), 31.9 (t), 35.6 (t), 38.3 (t), 67.5 (t), 83.7 (s), 108.6 (d), 111.3 (d), 116.5 (d), 119.7 (d), 120.0 (d), 120.6 (d), 120.7 (s), 121.5 (d), 122.1 (d), 123.4 (d), 124.8 (s), 124.9 (d), 124.9 (s), 130.3 (s), 135.5 (s), 137.1 (s), 172.0 (s) ppm; HRMS (ESI) calcd for  $\text{C}_{23}\text{H}_{22}\text{N}_2\text{NaO}_2$ : 381.1573 [M + Na] $^+$ ; found 381.12585.

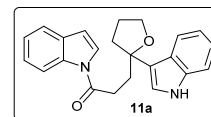

**9-(3-Hydroxypropyl)-9-(1*H*-indol-3-yl)-8,9-dihydropyrido[1,2-*a*]indol-6(7*H*)-one (12a):** Cyclization of alkynol **1a** (30 mg, 0.12 mmol) in the presence of indole **4a** (15 mg, 0.13 mmol) in  $\text{CH}_3\text{CN}$  solvent gave compound **12a** as pale brown gum (33 mg, 74%);  $R_f = 0.2$  (50% ethyl acetate in petroleum ether);  $^1\text{H NMR}$  (400 MHz,  $\text{DMSO}-d_6$ ):  $\delta$  1.47–1.64 (m, 2H), 2.13–2.31 (m, 2H), 2.34–2.49 (m, 2H), 2.69 (dt,  $J = 13.2, 4.9$  Hz, 1H), 2.80 (dt,  $J = 17.7, 5.0$  Hz, 1H), 3.42 (q,  $J = 6.0$  Hz, 2H), 4.45 (t,  $J = 5.0$  Hz, 1H), 6.56 (s, 1H), 6.72 (d,  $J = 2.2$  Hz, 1H), 6.88–6.95 (m, 1H), 7.06 (t,  $J = 7.3$  Hz, 1H), 7.25–7.31 (m, 2H), 7.37 (d,  $J = 8.1$  Hz, 1H), 7.53 (d,  $J = 8.0$  Hz, 1H), 7.56–7.61 (m, 1H), 8.35 (dd,  $J = 6.3, 2.0$  Hz, 1H), 10.92 (s, 1H);  $^{13}\text{C}\{^1\text{H}\}$  NMR (100 MHz,  $\text{DMSO}-d_6$ ):  $\delta$  28.1 (s), 30.3 (s), 31.0 (s), 35.2 (s), 39.6 (s), 61.1 (s), 105.0 (d), 112.0 (d), 115.7 (d), 117.9 (s), 118.5 (d), 119.9 (d), 120.3 (d), 120.9 (d), 123.7 (d), 123.9 (d), 124.9 (s), 129.2 (s), 134.4 (s), 137.2 (s), 144.7 (s), 169.2 (s), ppm; HRMS (ESI) calcd for  $\text{C}_{23}\text{H}_{22}\text{N}_2\text{NaO}_2$ : 381.1573 [M + Na] $^+$ ; found 381.1583.

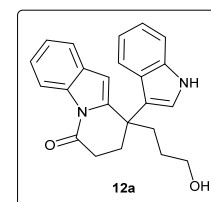

**7-Hydroxy-1-(1H-indol-1-yl)heptane-1,4-dione (3a):** Colourless syrup (5 mg, 15%);  $R_f = 0.2$  (40% ethyl acetate in petroleum ether);  $^1\text{H NMR}$  (400 MHz,  $\text{CDCl}_3$ ):  $\delta$  1.82 (br. s., 1H), 1.92 (quin,  $J = 6.5$  Hz, 2H), 2.73 (t,  $J = 6.9$  Hz, 2H), 2.97 (t,  $J = 6.2$  Hz, 2H), 3.26 (t,  $J = 6.2$  Hz, 2H), 3.69 (t,  $J = 6.0$  Hz, 2H), 6.66 (d,  $J = 3.7$  Hz, 1H), 7.23–7.29 (m, 1H), 7.31–7.37 (m, 1H), 7.53 (d,  $J = 3.7$  Hz, 1H), 7.57 (d,  $J = 7.5$  Hz, 1H), 8.40 (d,  $J = 8.1$  Hz, 1H);  $^{13}\text{C}\{^1\text{H}\}$  NMR (100 MHz,  $\text{CDCl}_3$ ):  $\delta$  26.5 (t), 29.7 (t), 36.5 (t), 39.5 (t), 62.1 (t), 109.4 (d), 116.5 (d), 120.9 (d), 123.7 (d), 124.4 (d), 125.1 (d), 130.3 (s), 135.6 (s), 170.3 (s), 209.4 (s) ppm; HRMS (ESI) calcd for  $\text{C}_{15}\text{H}_{17}\text{NNaO}_3$ : 282.1101 [ $\text{M} + \text{Na}$ ] $^+$ ; found 282.1106.

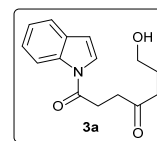

**Methyl 2-(1-(7-hydroxy-4-oxoheptanoyl)-1H-indol-3-yl)acetate (3p):** Colourless liquid (12 mg, 37%);  $R_f = 0.1$  (50% ethyl acetate in petroleum ether);  $^1\text{H NMR}$  (400 MHz,  $\text{CDCl}_3$ ):  $\delta$  1.83–1.96 (m, 2H), 2.73 (t,  $J = 6.9$  Hz, 2H), 2.96 (t,  $J = 6.1$  Hz, 2H), 3.25 (t,  $J = 6.2$  Hz, 2H), 3.67–3.71 (m, 2H), 3.71–3.76 (m, 5H), 7.28–7.33 (m, 1H), 7.33–7.39 (m, 1H), 7.49–7.57 (m, 2H), 8.39 (d,  $J = 8.1$  Hz, 1H);  $^{13}\text{C}\{^1\text{H}\}$  NMR (100 MHz,  $\text{CDCl}_3$ ):  $\delta$  26.5 (t), 29.7 (t), 30.8 (t), 36.5 (t), 39.5 (t), 52.2 (q), 62.1 (t), 115.2 (s), 116.6 (d), 118.8 (d), 123.1 (d), 123.7 (d), 125.5 (d), 130.0 (s), 135.8 (s), 170.1 (s), 171.3 (s), 209.3 (s) ppm; HRMS (ESI) calcd for  $\text{C}_{18}\text{H}_{21}\text{NNaO}_5$ : 354.1312 [ $\text{M} + \text{Na}$ ] $^+$ ; found 354.1307.

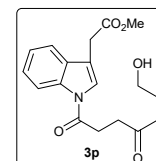

**8-Hydroxy-1-(1H-indol-1-yl)octane-1,4-dione (3s):** Colourless oil (24.5 mg, 76%);  $R_f = 0.2$  (40% ethyl acetate in petroleum ether);  $^1\text{H NMR}$  (400 MHz,  $\text{CDCl}_3$ ):  $\delta$  1.63 (br. s., 1H), 1.82–1.91 (m, 2H), 2.13 (quin,  $J = 6.9$  Hz, 2H), 2.59 (t,  $J = 6.8$  Hz, 2H), 2.68 (t,  $J = 6.8$  Hz, 2H), 2.98 (t,  $J = 7.0$  Hz, 2H), 3.67 (t,  $J = 6.0$  Hz, 2H), 6.65 (d,  $J = 3.7$  Hz, 1H), 7.28 (td,  $J = 1.0, 7.4$  Hz, 1H), 7.34–7.39 (m, 1H), 7.51 (d,  $J = 3.8$  Hz, 1H), 7.57 (d,  $J = 7.6$  Hz, 1H), 8.46 (d,  $J = 8.2$  Hz, 1H);  $^{13}\text{C}\{^1\text{H}\}$  NMR (100 MHz,  $\text{CDCl}_3$ ):  $\delta$  18.6 (t), 26.5 (t), 34.7 (t), 39.6 (t), 41.3 (t), 62.2 (t), 109.3 (d), 116.5 (d), 120.8 (d), 123.7 (d), 124.7 (d), 125.1 (d), 130.4 (s), 135.6 (s), 171.1 (s), 210.8 (s) ppm; HRMS (ESI) calcd for  $\text{C}_{16}\text{H}_{19}\text{NNaO}_3$ : 296.1257 [ $\text{M} + \text{Na}$ ] $^+$ ; found 296.1252.

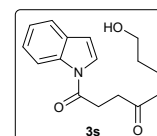

**N-(7-(1H-indol-1-yl)-4,7-dioxoheptyl)-4-methylbenzenesulfonamide (3t):** Prepared from alkynylamine **1t** (50 mg, 0.12 mmol). Pale brown solid (31 mg, 60%);  $R_f = 0.5$  (40% ethyl acetate in petroleum ether); mp: 94–96 °C;  $^1\text{H NMR}$  (400 MHz,  $\text{CDCl}_3$ ):  $\delta$  1.83 (quin,  $J = 6.6$  Hz, 1H), 2.41 (s, 3H), 2.69 (t,  $J = 6.6$  Hz, 2H), 2.91 (dd,  $J = 6.7, 5.8$  Hz, 2H), 2.99 (q,  $J = 6.4$  Hz, 2H), 3.19–3.30 (m, 2H), 4.72 (t,  $J = 6.3$  Hz, 1H), 6.67 (d,  $J = 3.7$  Hz, 1H), 7.28–7.32 (m, 3H), 7.32–7.37 (m, 1H), 7.50–7.60 (m, 2H), 7.74 (d,  $J = 8.2$  Hz, 2H), 8.38 (d,  $J = 8.1$  Hz, 1H);  $^{13}\text{C}\{^1\text{H}\}$  NMR (100 MHz,  $\text{CDCl}_3$ ):  $\delta$  21.5 (q), 23.3 (t), 29.8 (t), 36.5 (t), 39.4 (t), 42.4 (t), 109.5 (d), 116.5 (d), 120.9 (d), 123.7 (d), 124.5 (d), 125.1 (d), 127.0 (d, 2C), 129.7 (d, 2C), 130.3 (s), 135.6 (s), 137.0 (s), 143.4 (s), 170.3 (s), 208.7 (s) ppm; HRMS (ESI) calcd for  $\text{C}_{22}\text{H}_{24}\text{N}_2\text{SNaO}_4$ : 435.1349 [ $\text{M} + \text{Na}$ ] $^+$ ; found 435.1360.

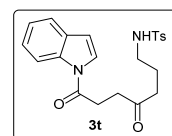

## References

- 1 L. W. Bieber, M. F. da Silva, *Tetrahedron Lett.*, 2007, **48**, 7088–7090.
- 2 J. Adrian, C. B. W. Stark, *Eur. J. Org. Chem.*, 2016, 4607–4610.
- 3 E. Dalcanale, F. Montanari, *J. Org. Chem.*, 1986, **51**, 567–569.
- 4 T. Yamauchi, J. -I. Takidaira, K. Okamoto, T. Sugiura, H. Horikoshi, S. Kudo, S. Sasaki, N. Mizushima, K. Higashiyama, *Heterocycles*, 2014, **88**, 1175–1189.
- 5 B. R. D'Souza, T. K. Lane, J. Louie, *Org. Lett.*, 2011, **13**, 2936–2939.
- 6 A. Suarez, G. C. Fu, *Angew. Chem. Int. Ed.*, 2004, **43**, 3580–3582.
- 7 A. Hajra, J. A. Kephart, A. Velian, G. Lalic, *J. Am. Chem. Soc.*, 2021, **143**, 7903–7908.
- 8 Umehara, H. Ueda, H. Tokuyama, *J. Org. Chem.*, 2016, **81**, 11444–11453.

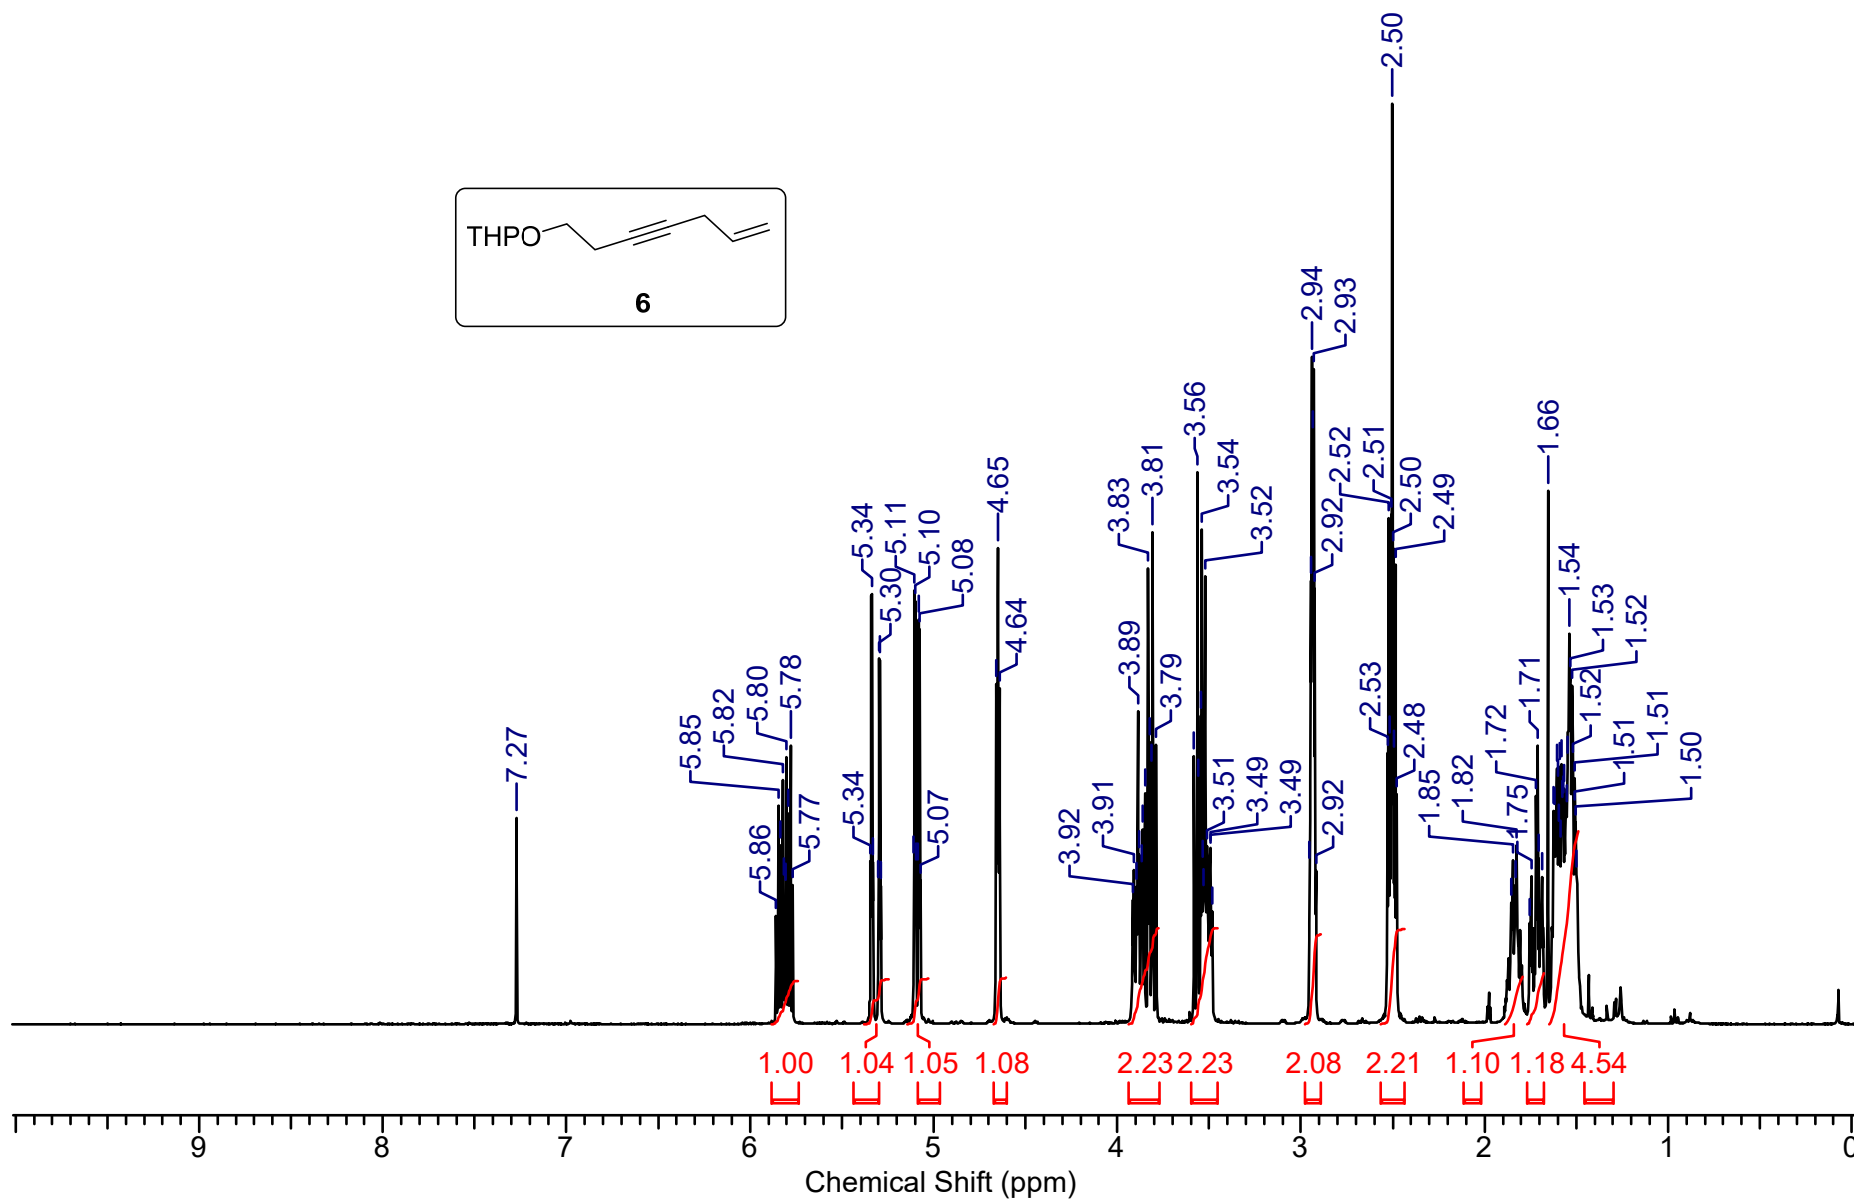

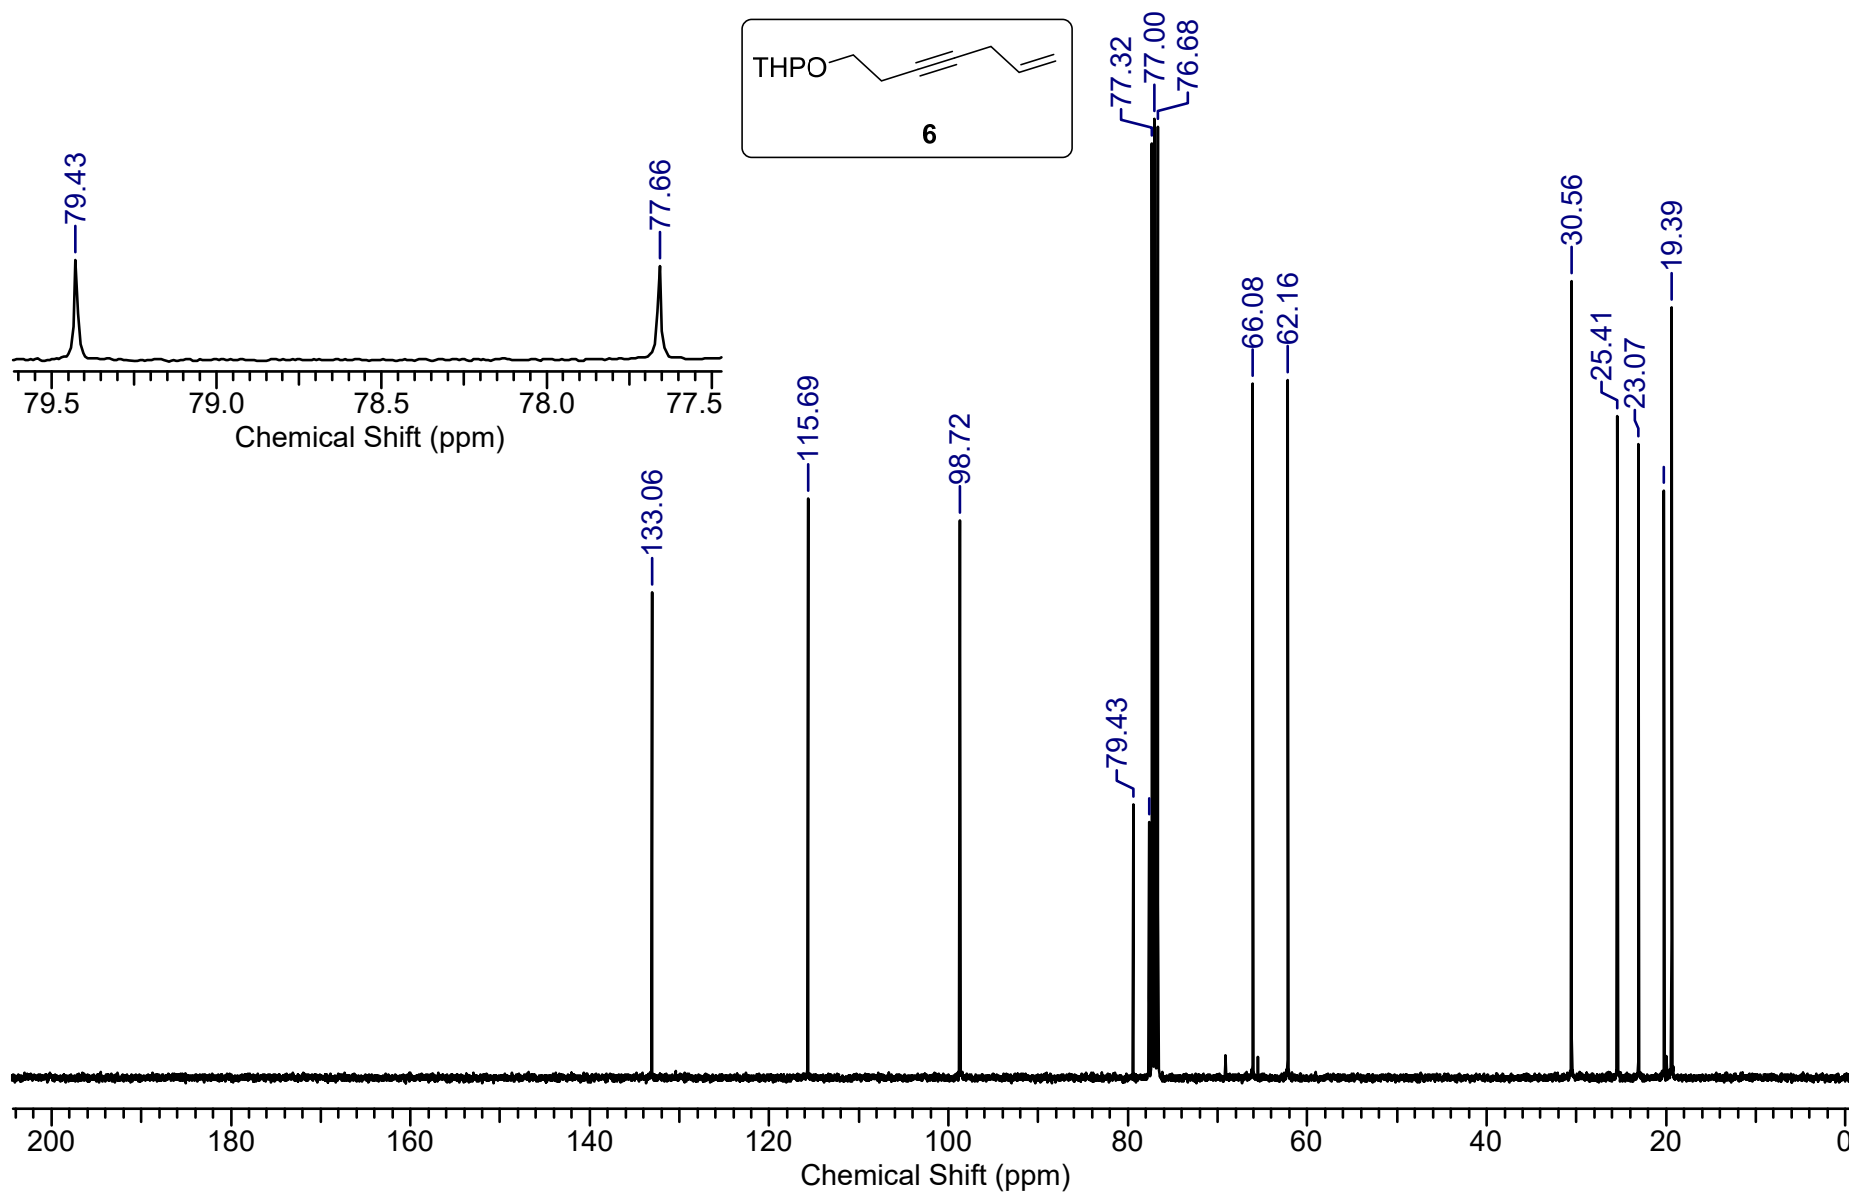

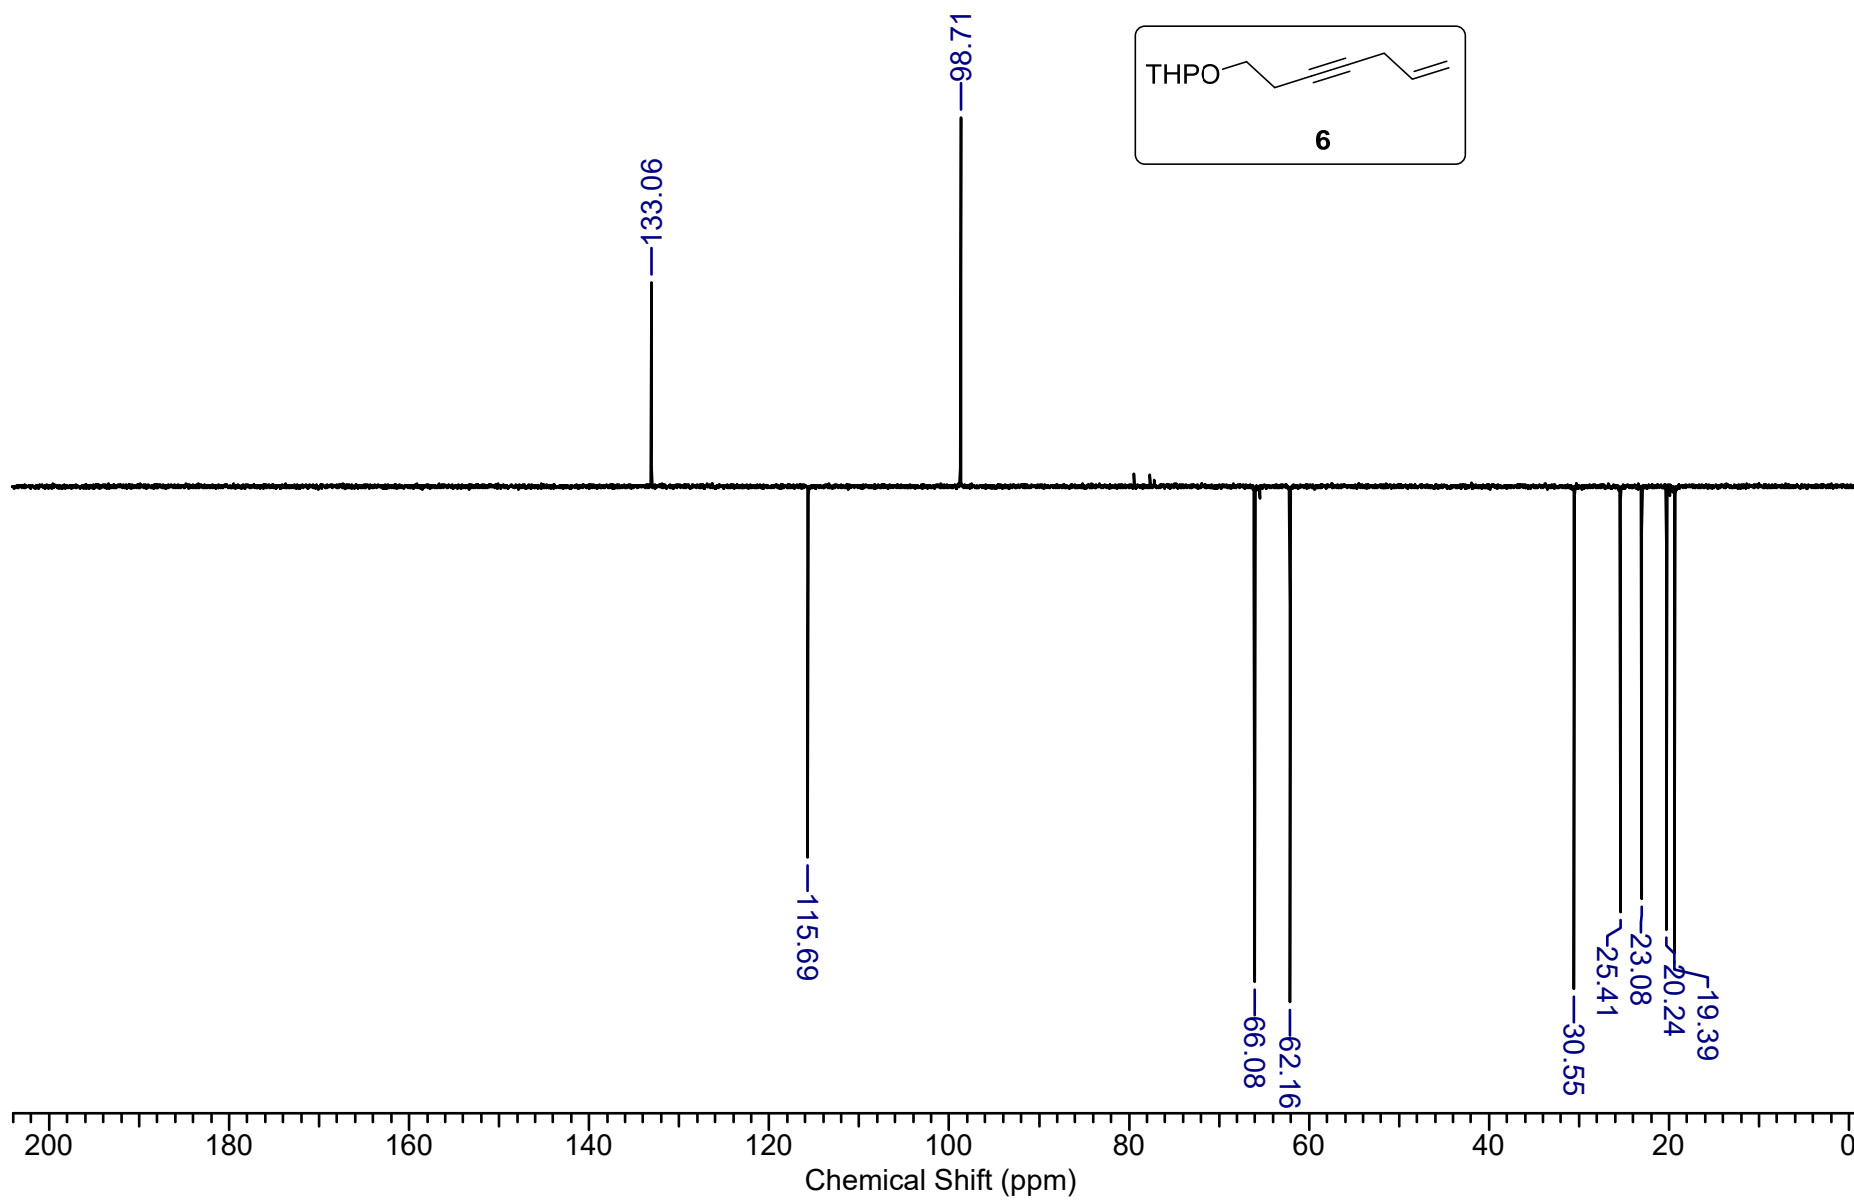

M-1 #522 RT: 3.03 AV: 1 NL: 1.04E8  
T: FTMS + p ESI Full ms [100.0000-1500.0000]

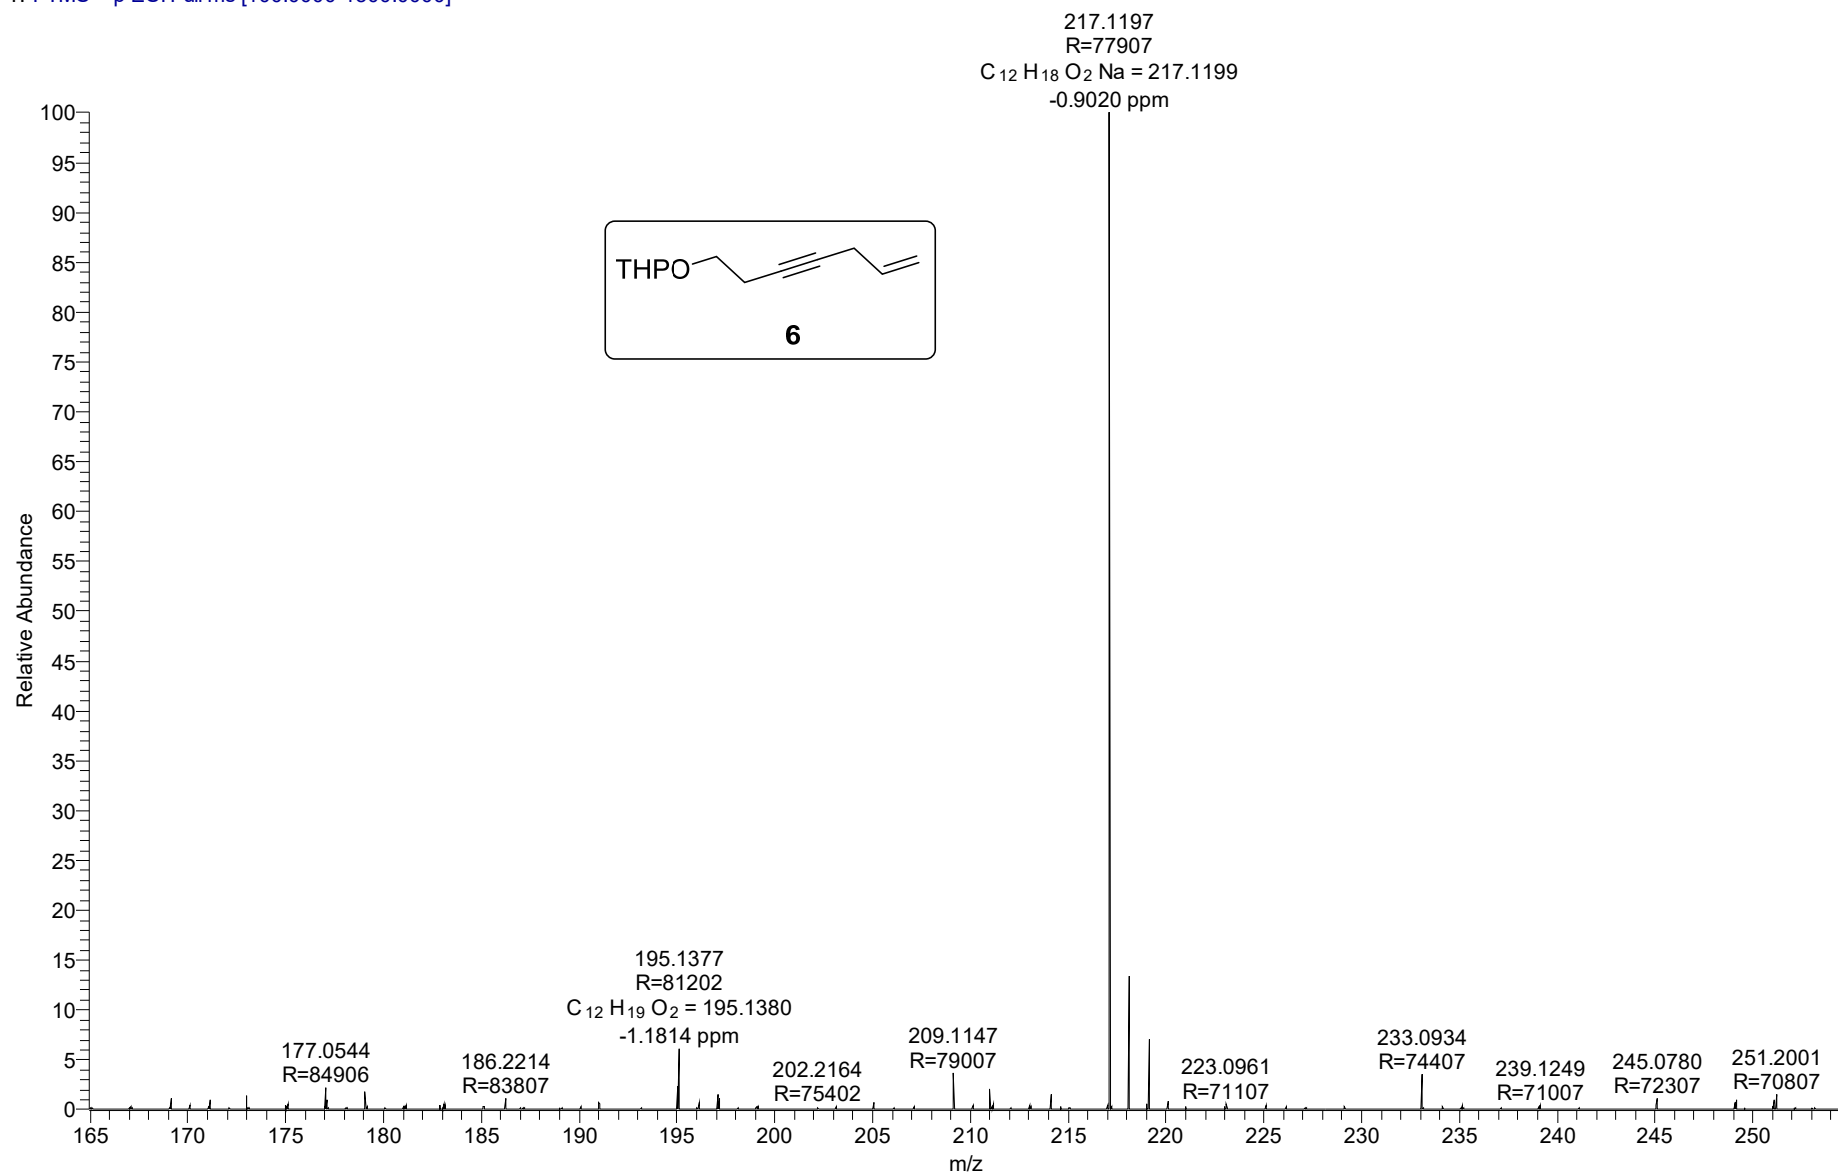

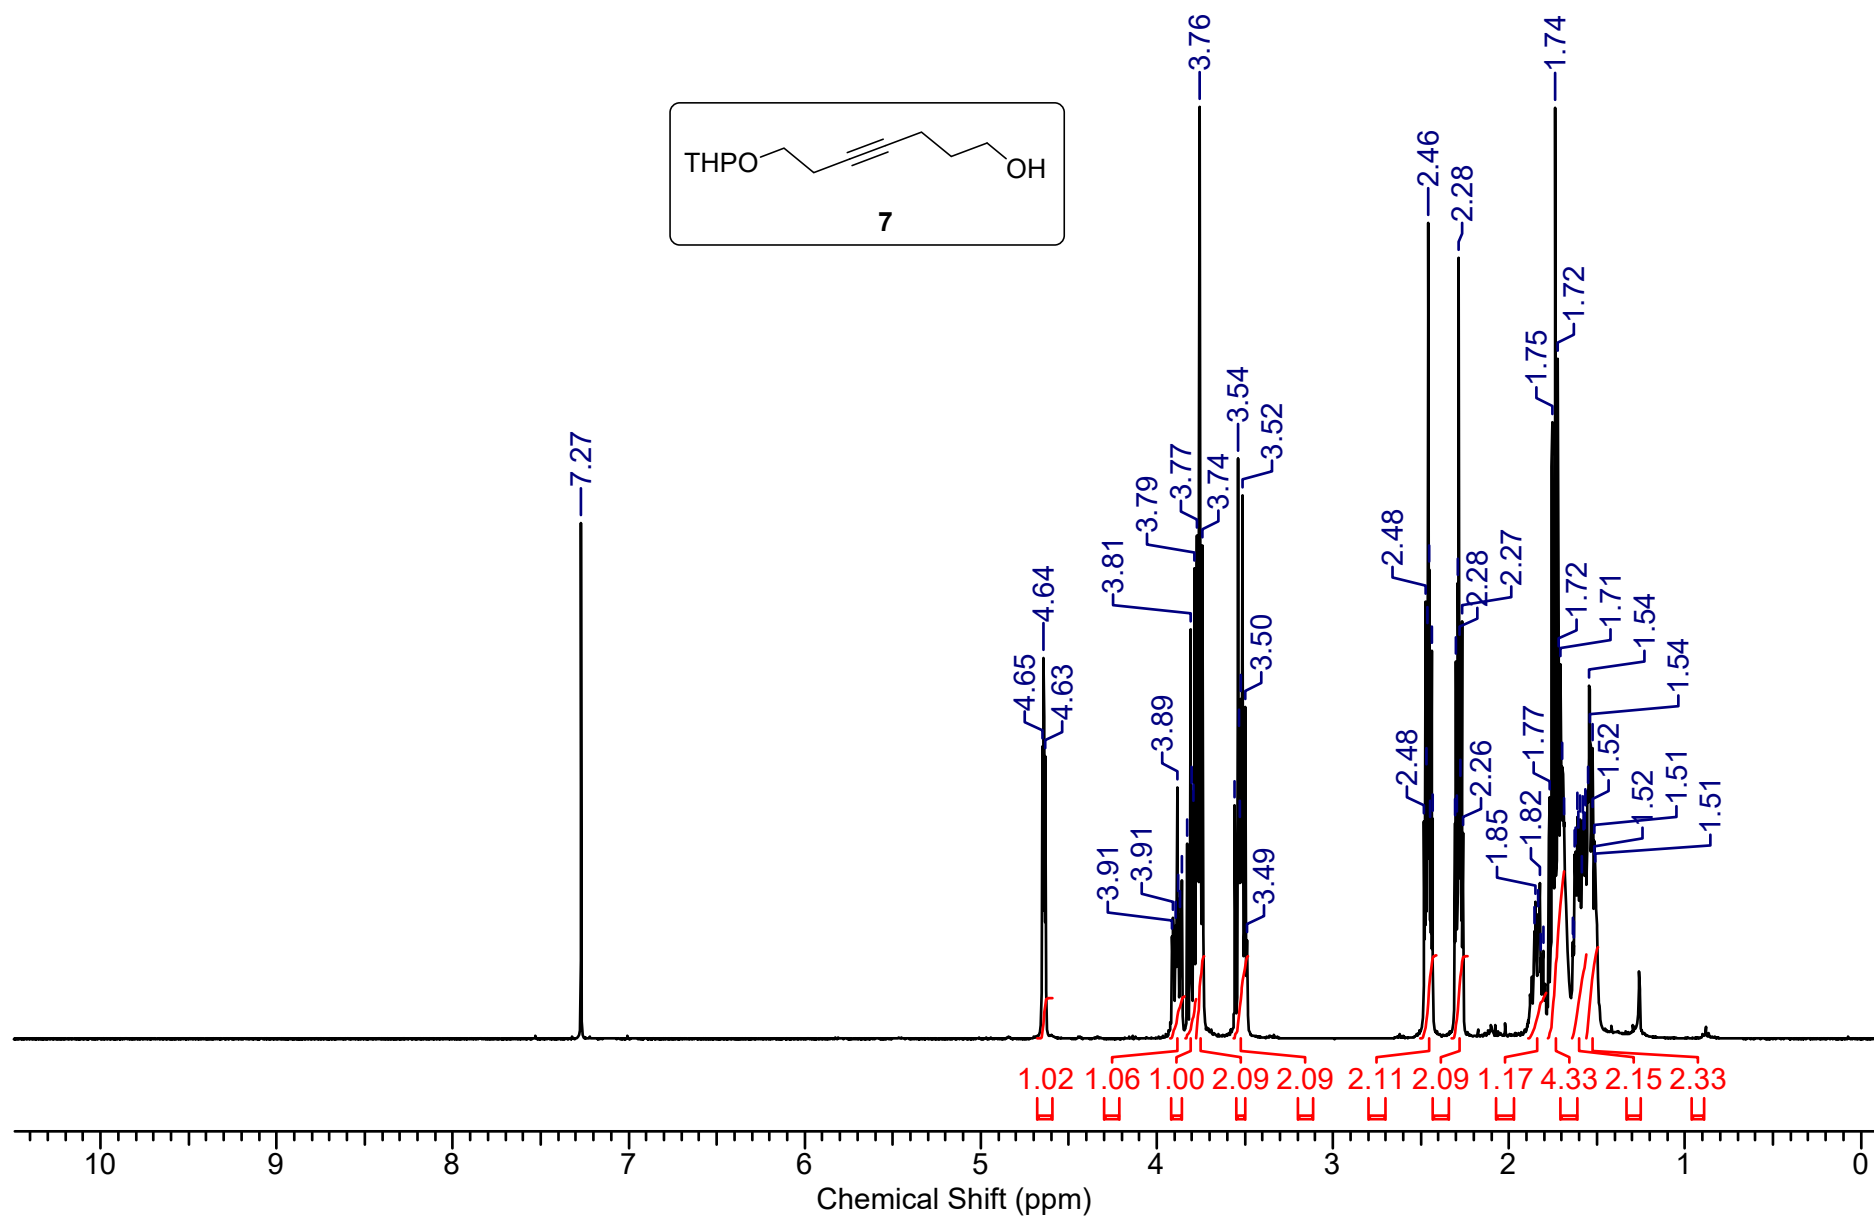



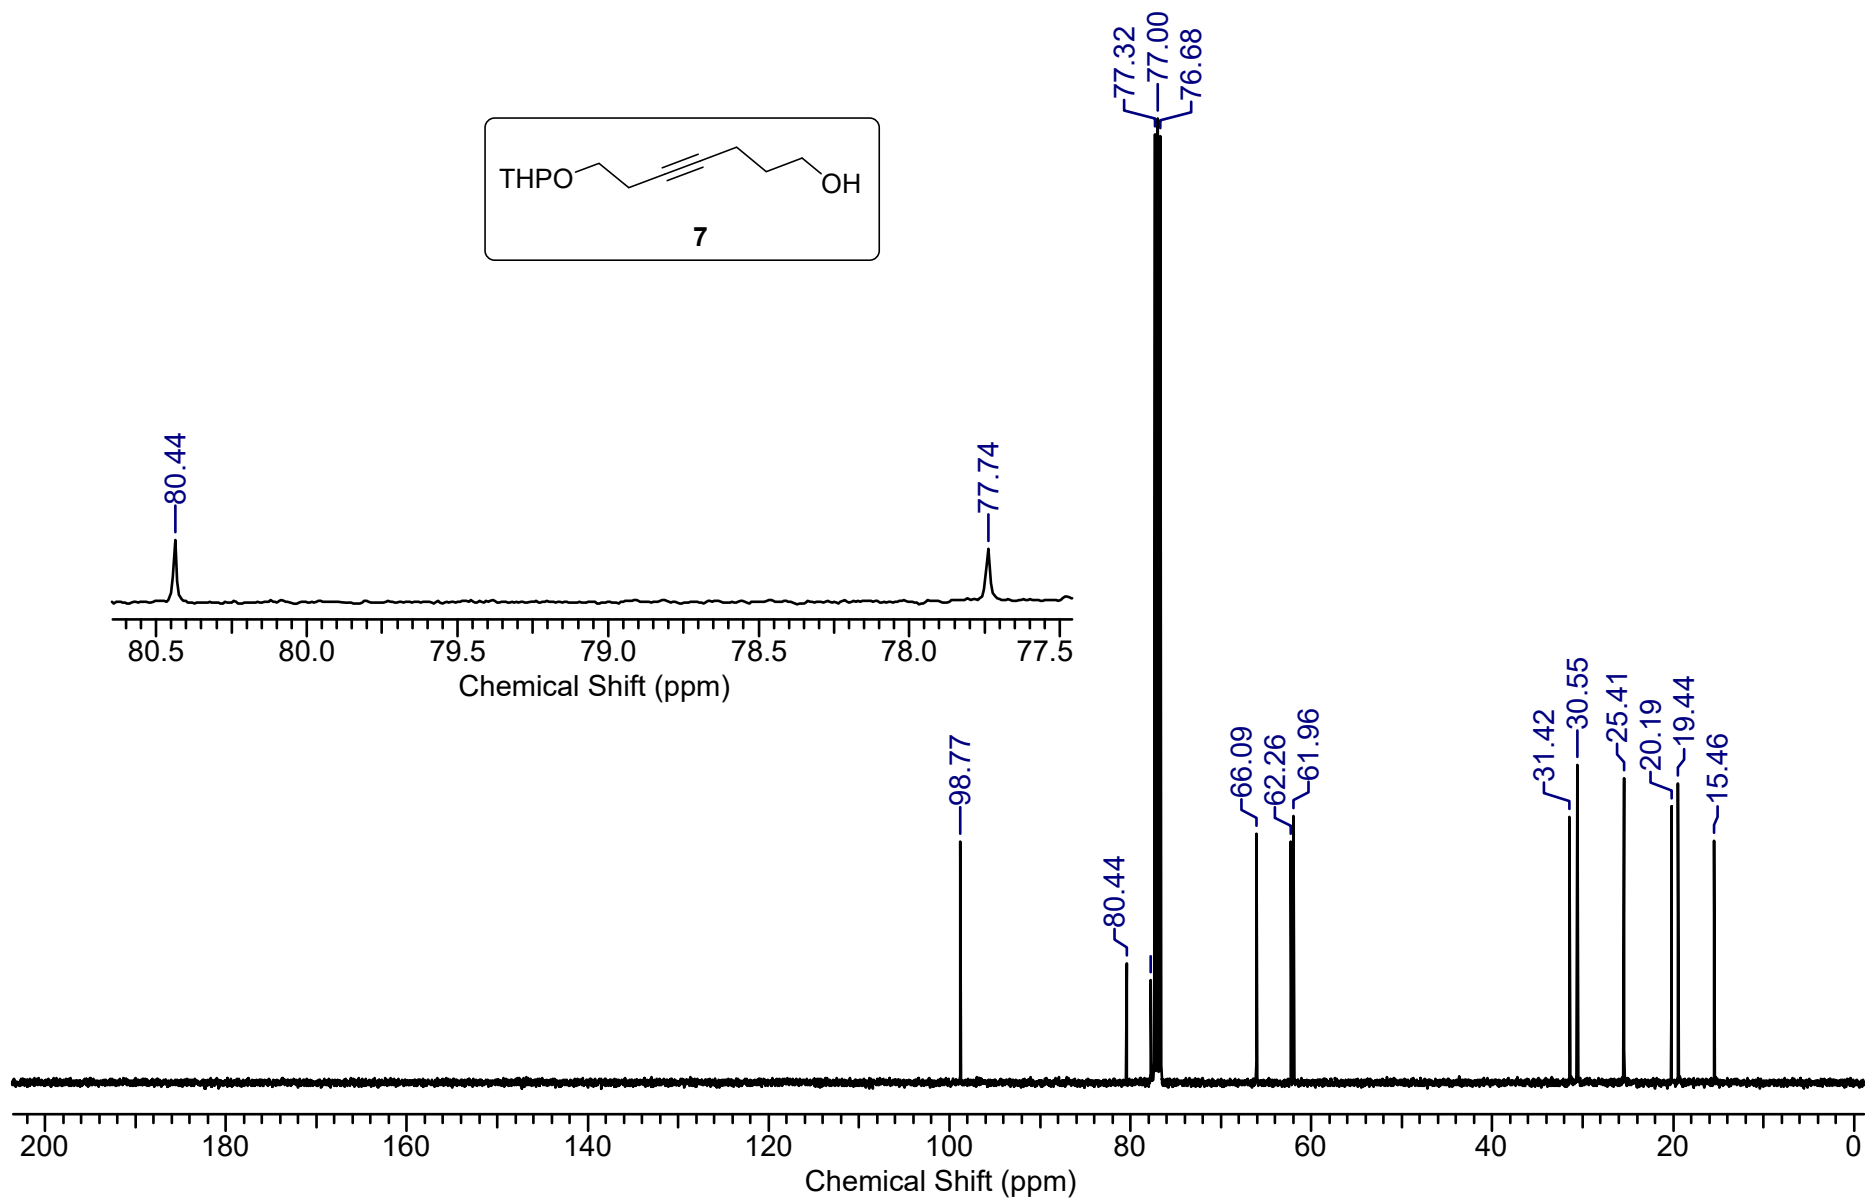

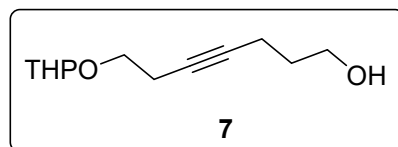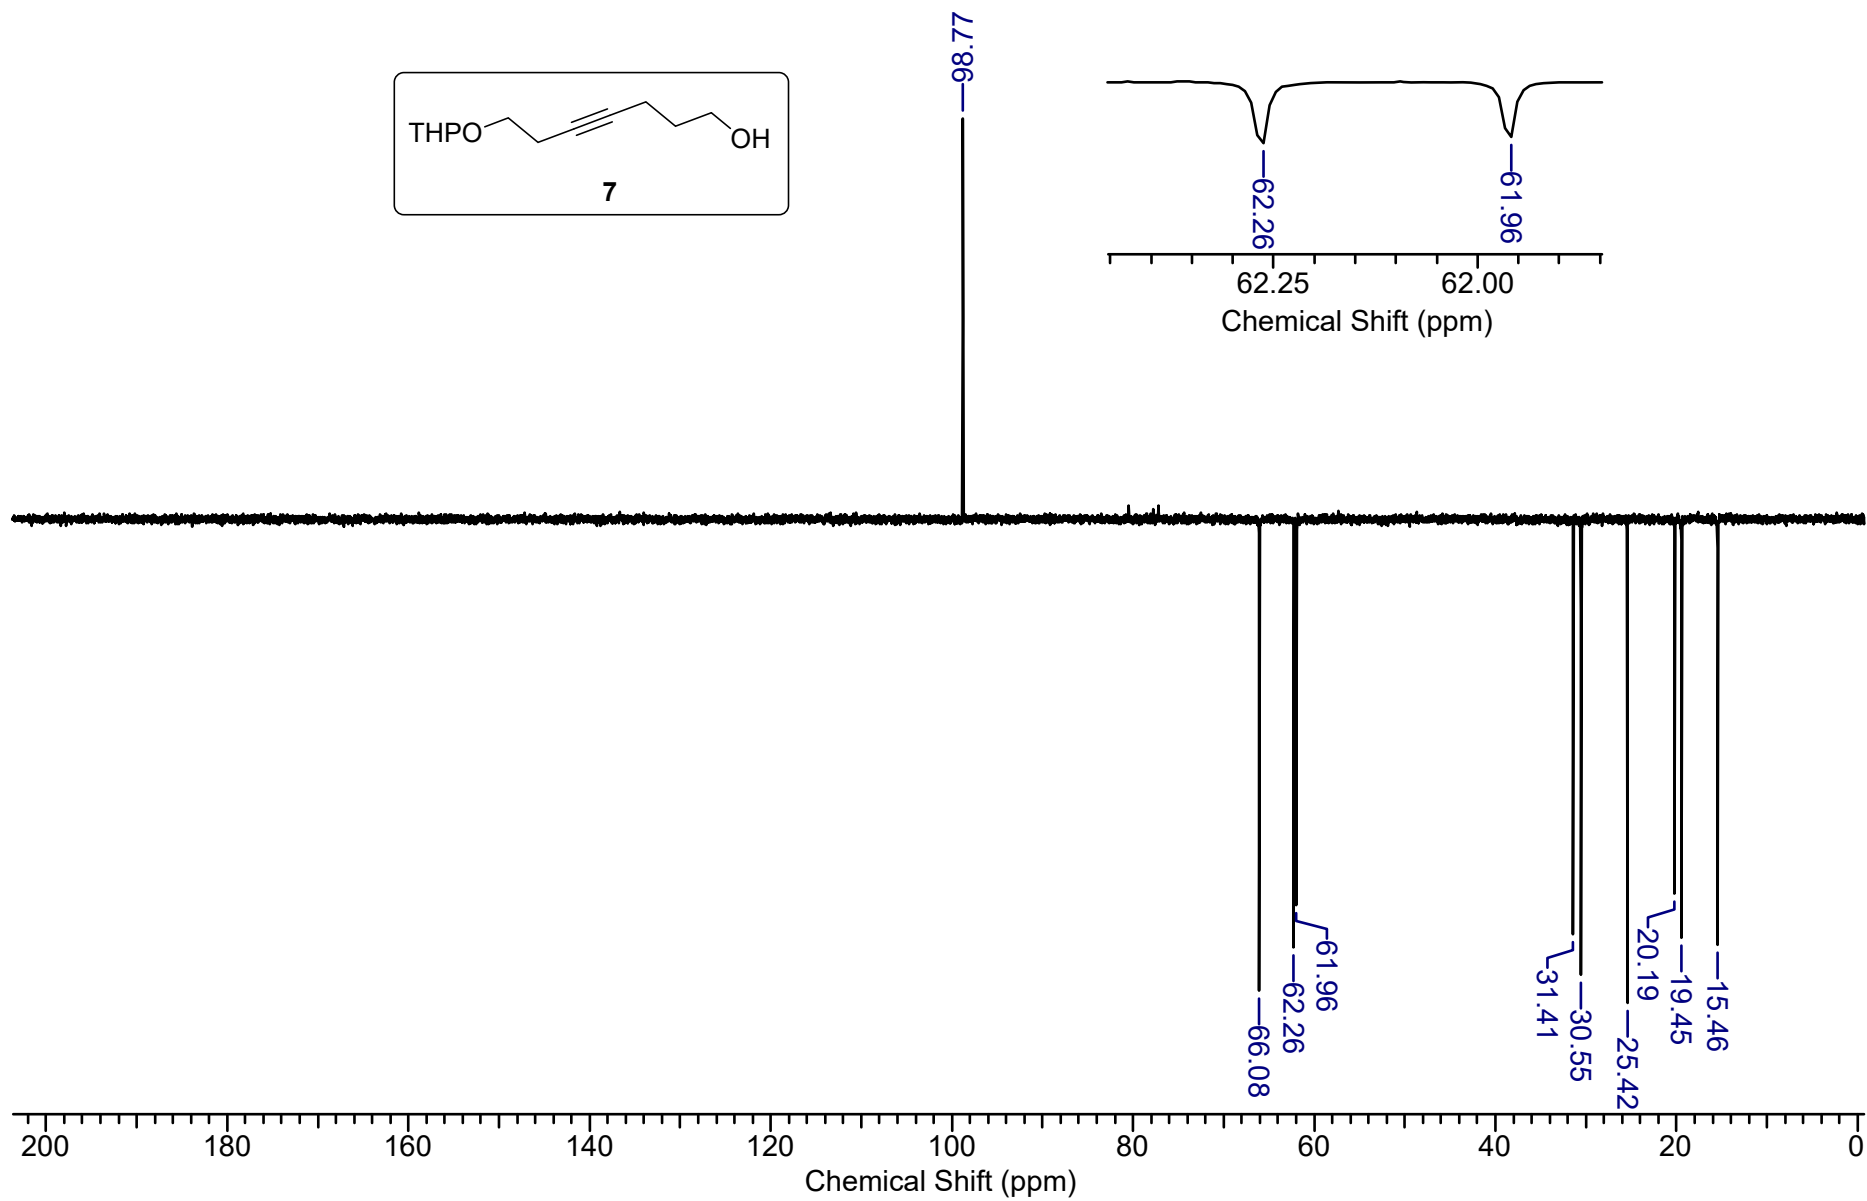

M-2 #458 RT: 2.62 AV: 1 NL: 3.97E8  
T: FTMS + p ESI Full ms [100.0000-1500.0000]

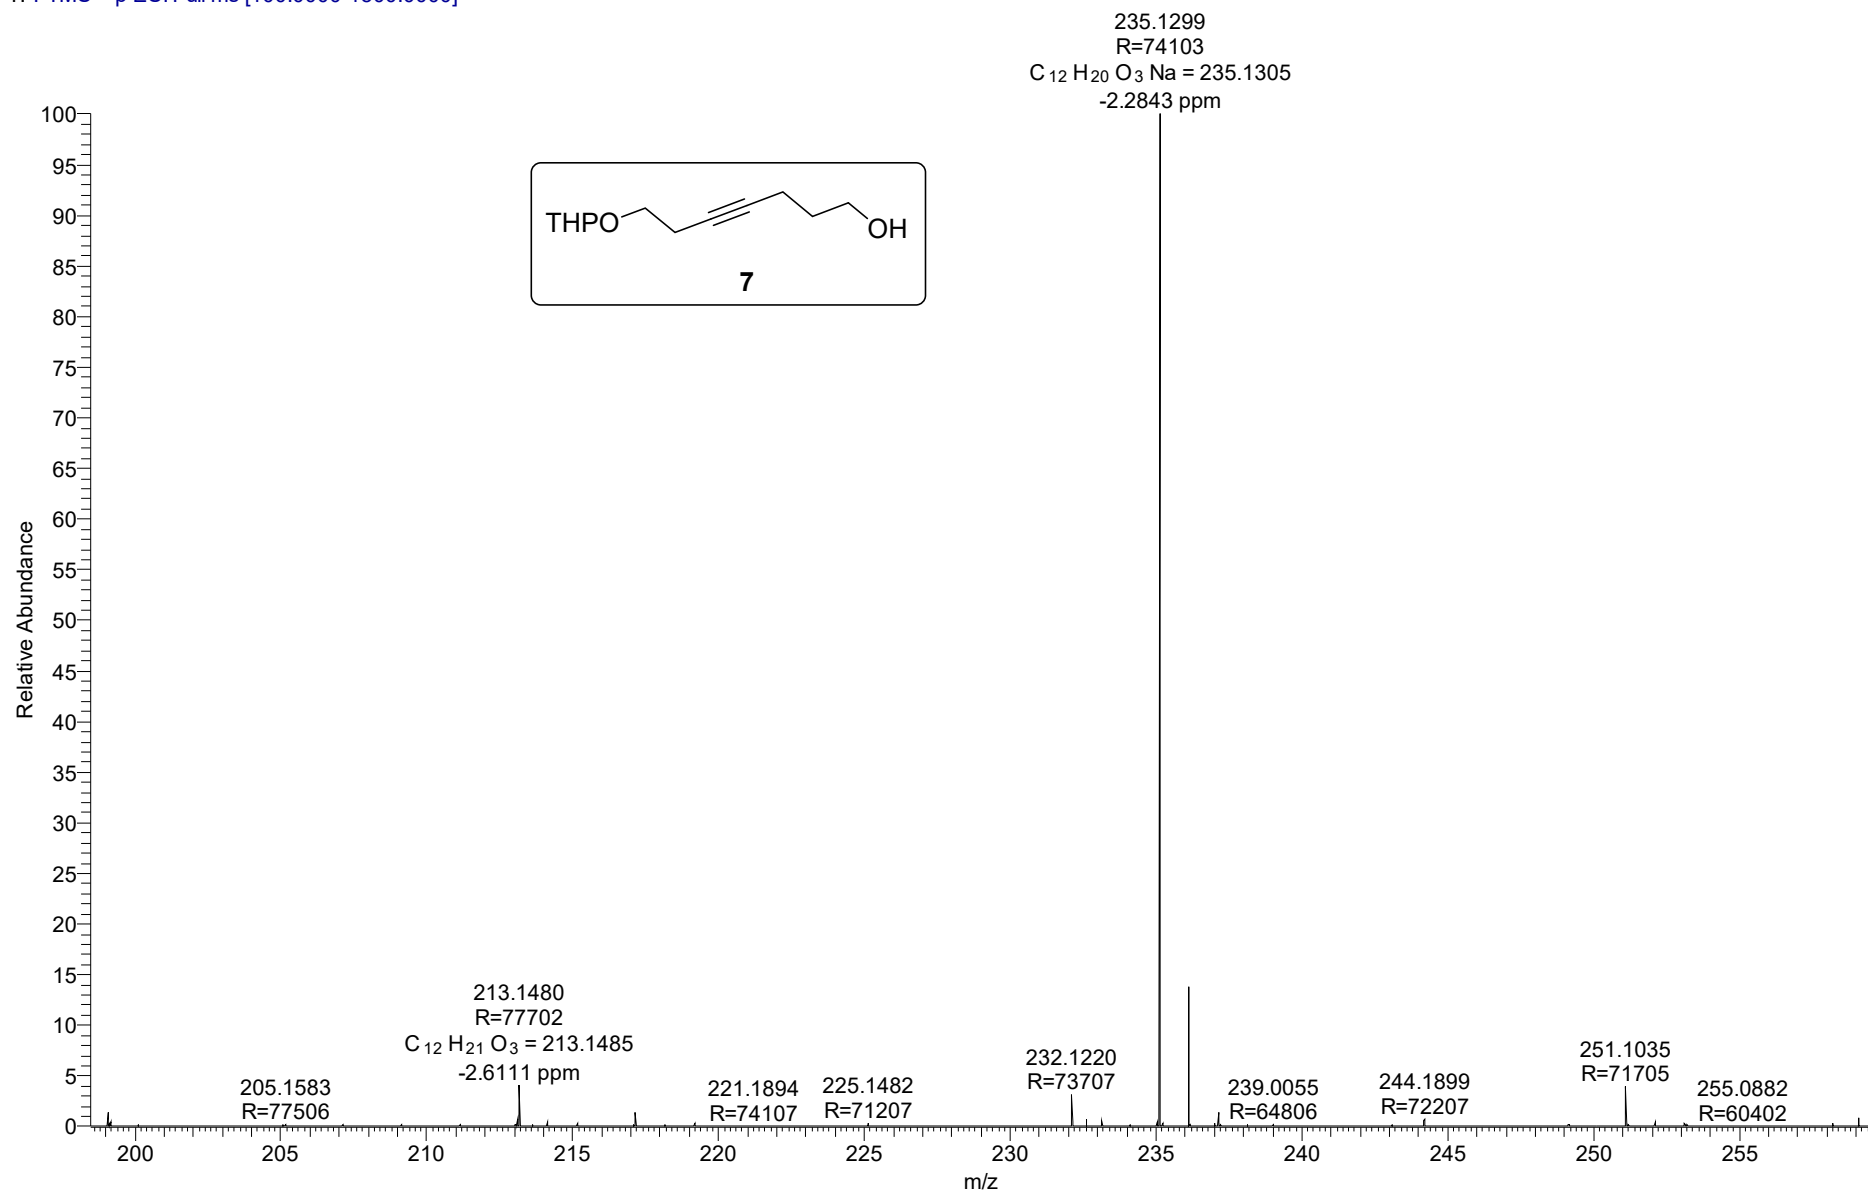

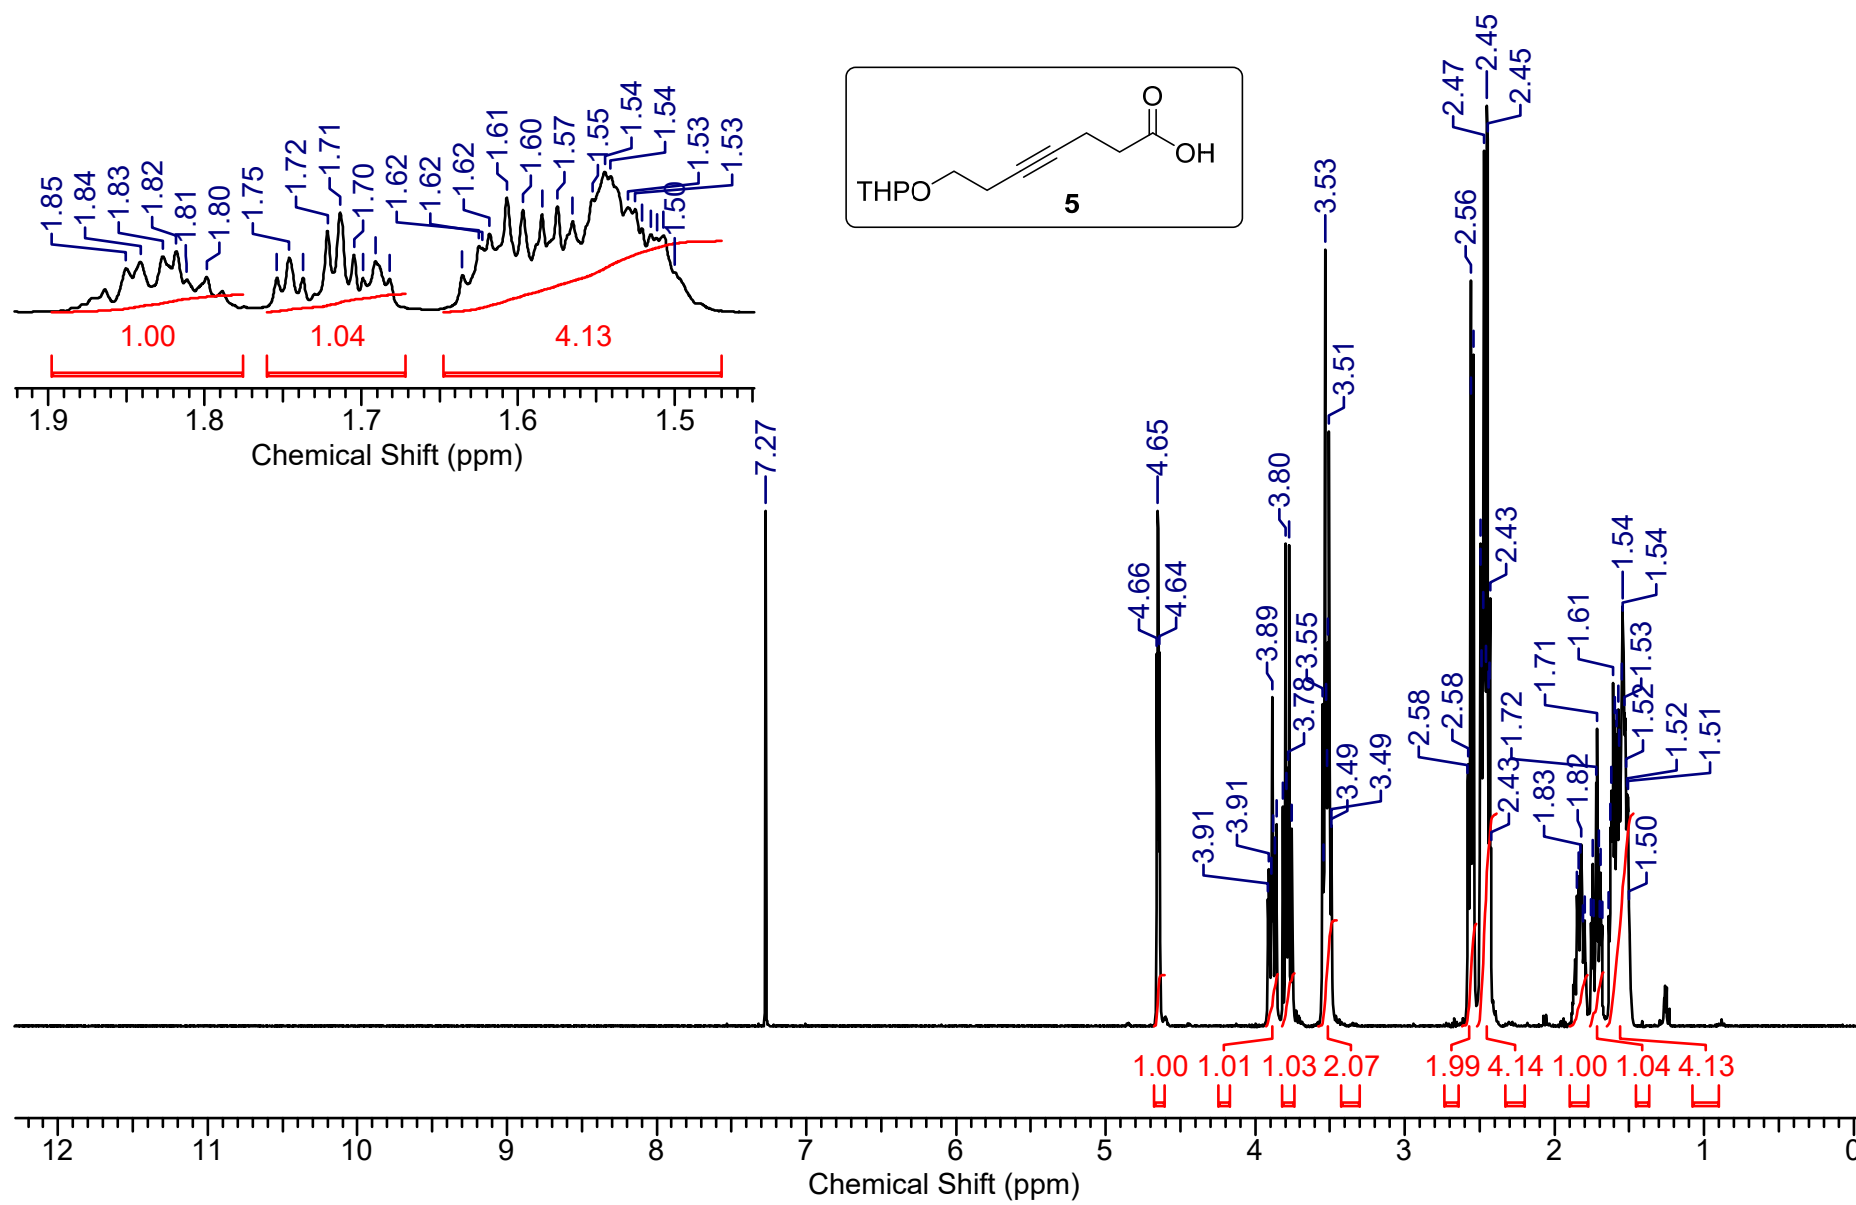

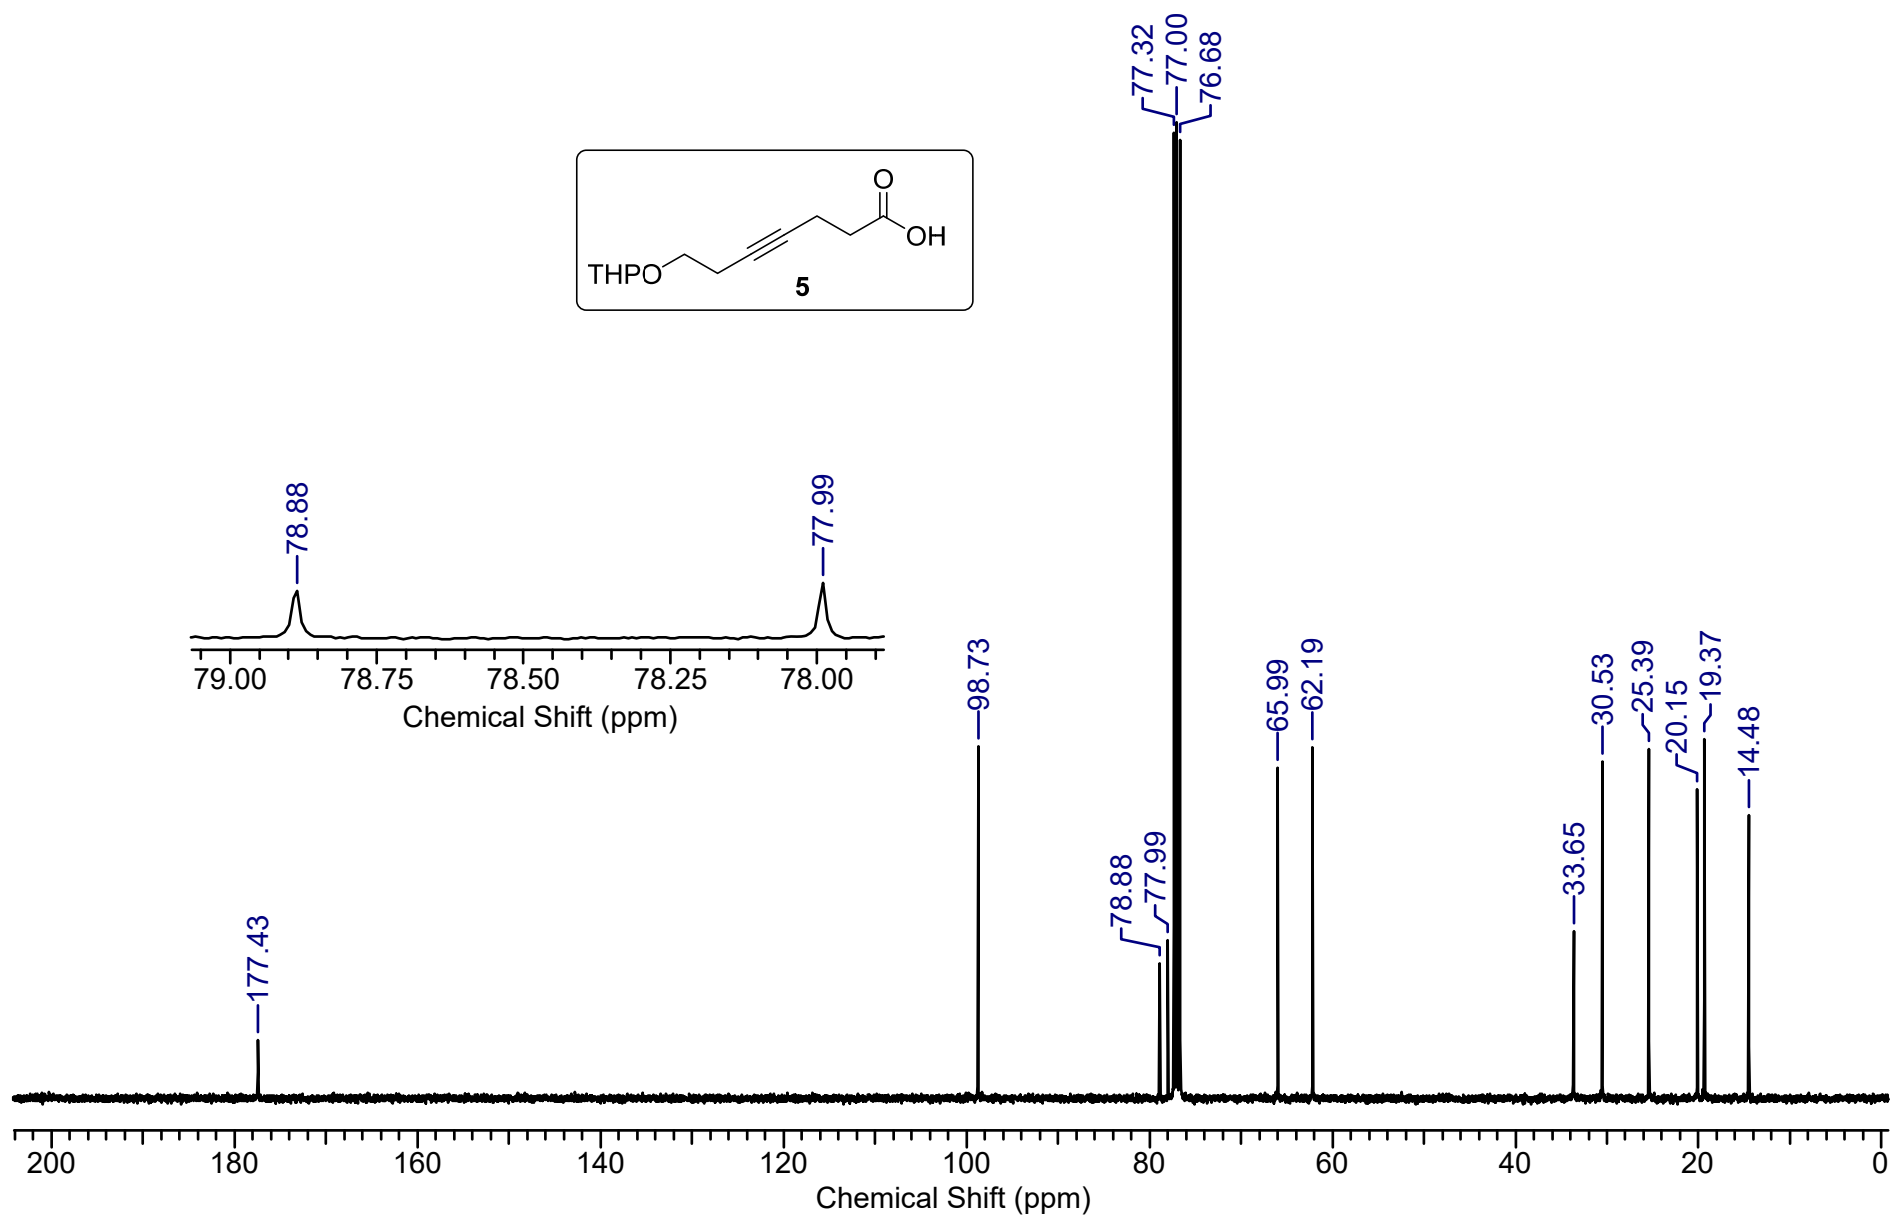

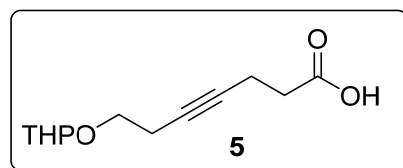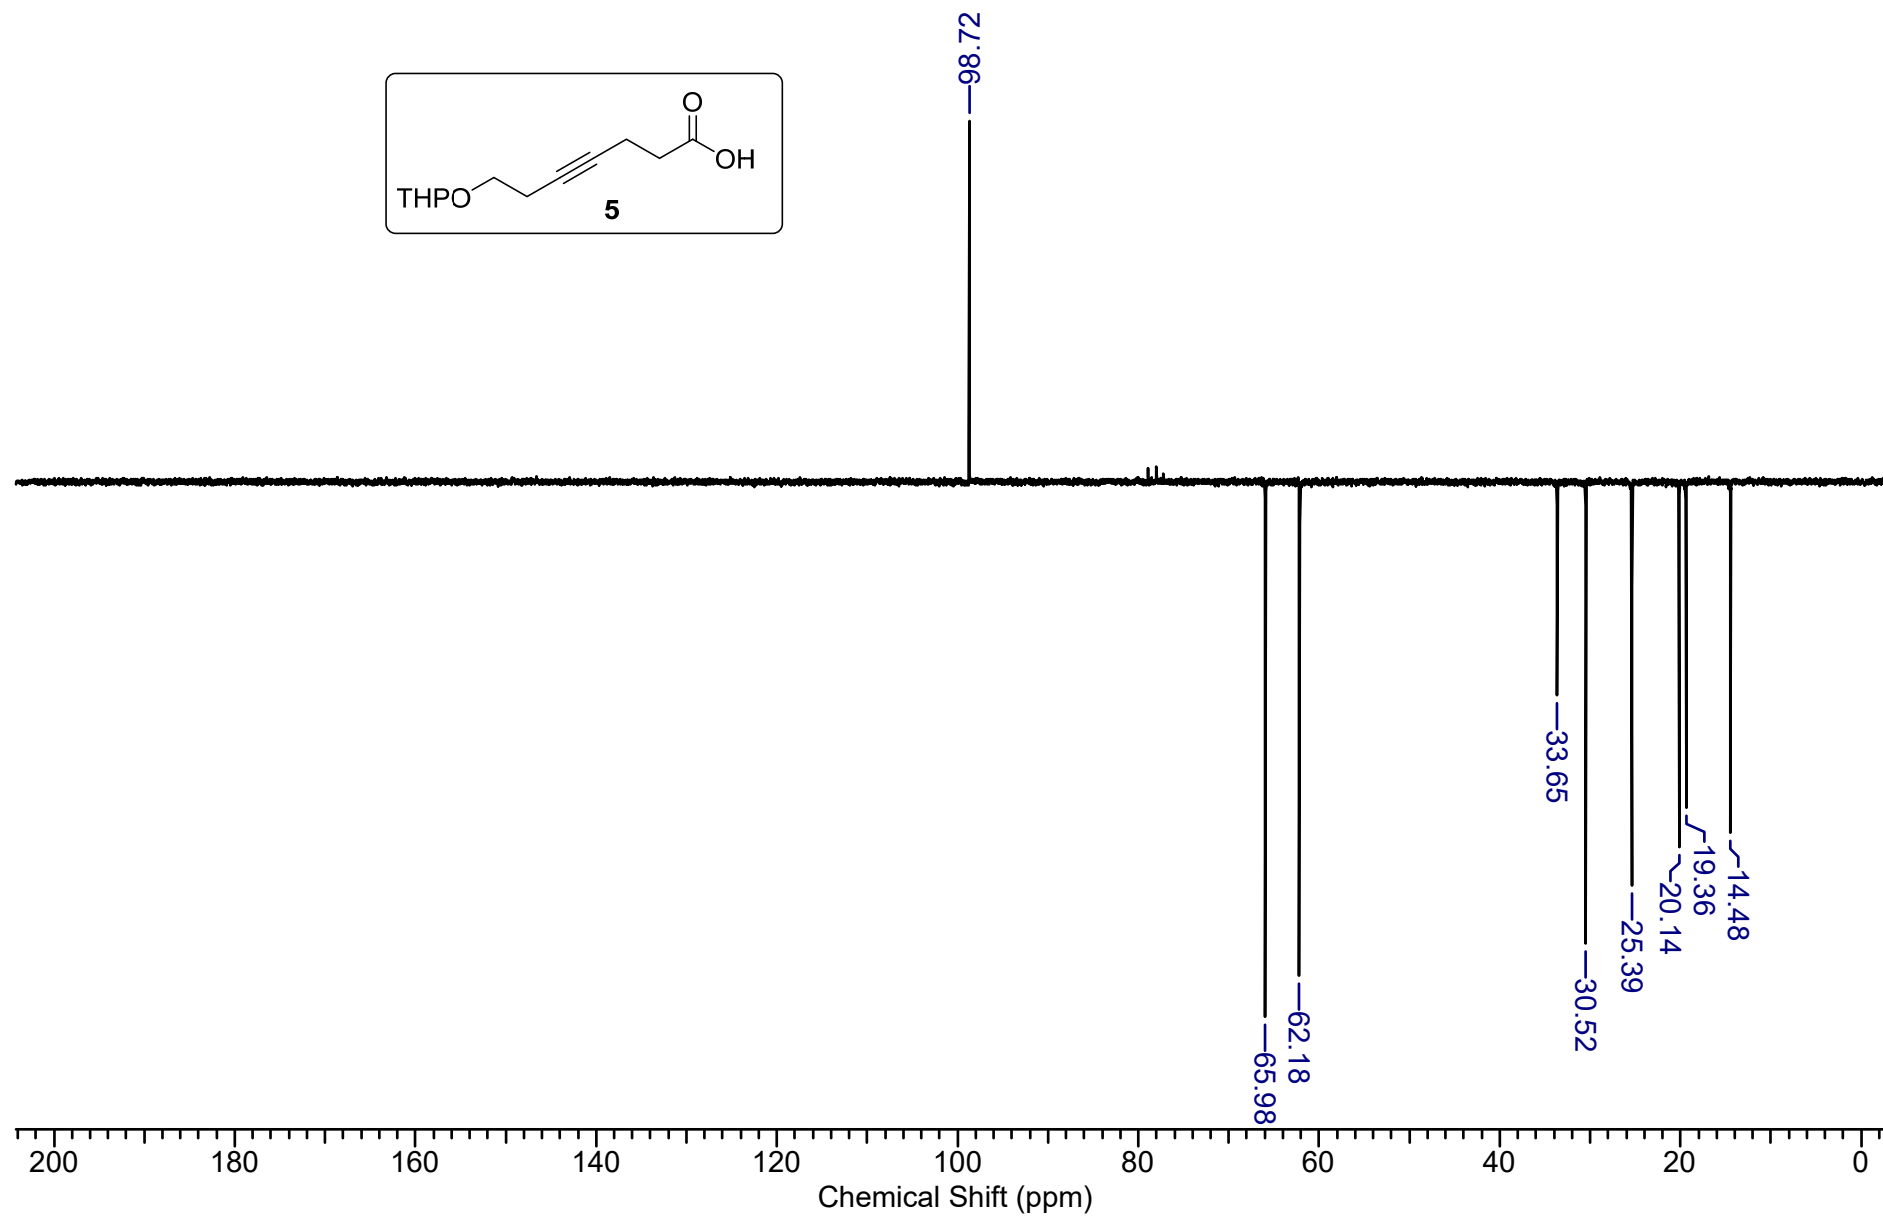

M-4 #447 RT: 2.60 AV: 1 NL: 2.41E8  
T: FTMS + p ESI Full ms [100.0000-1500.0000]

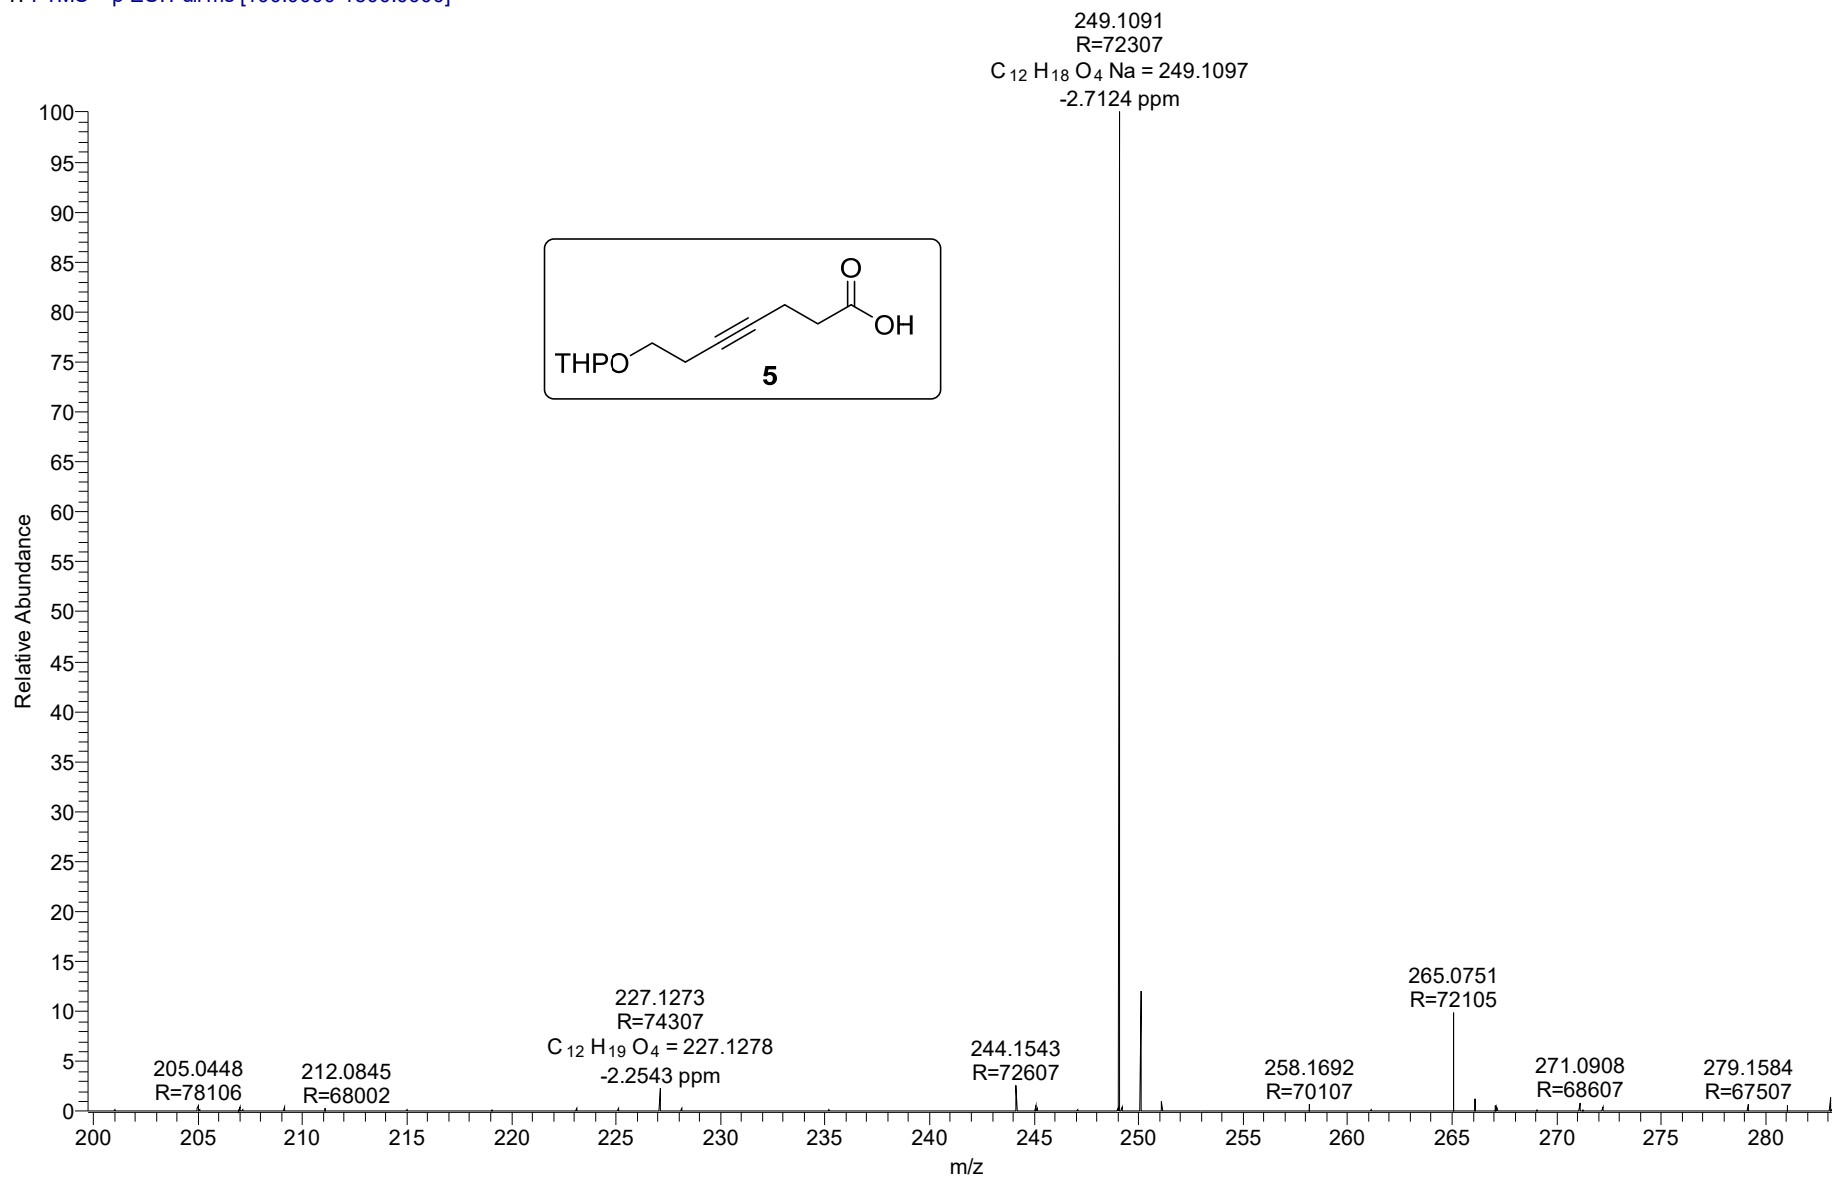

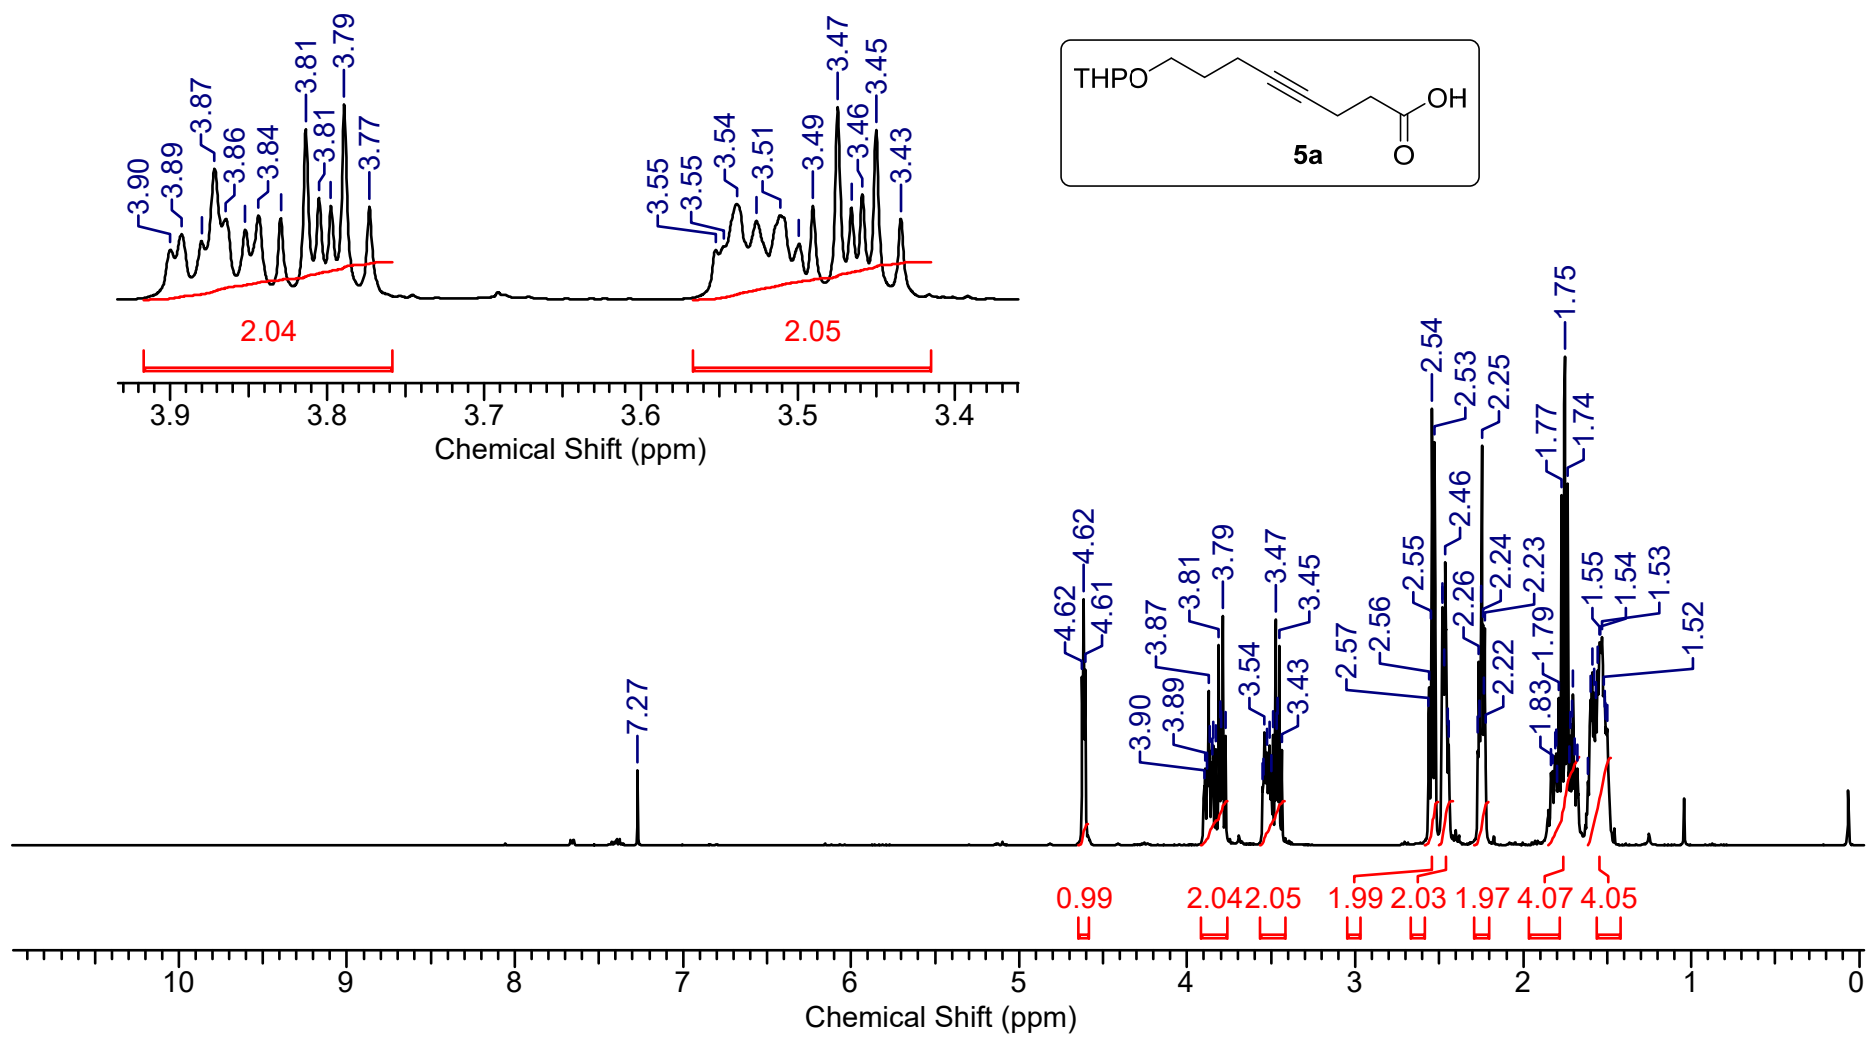



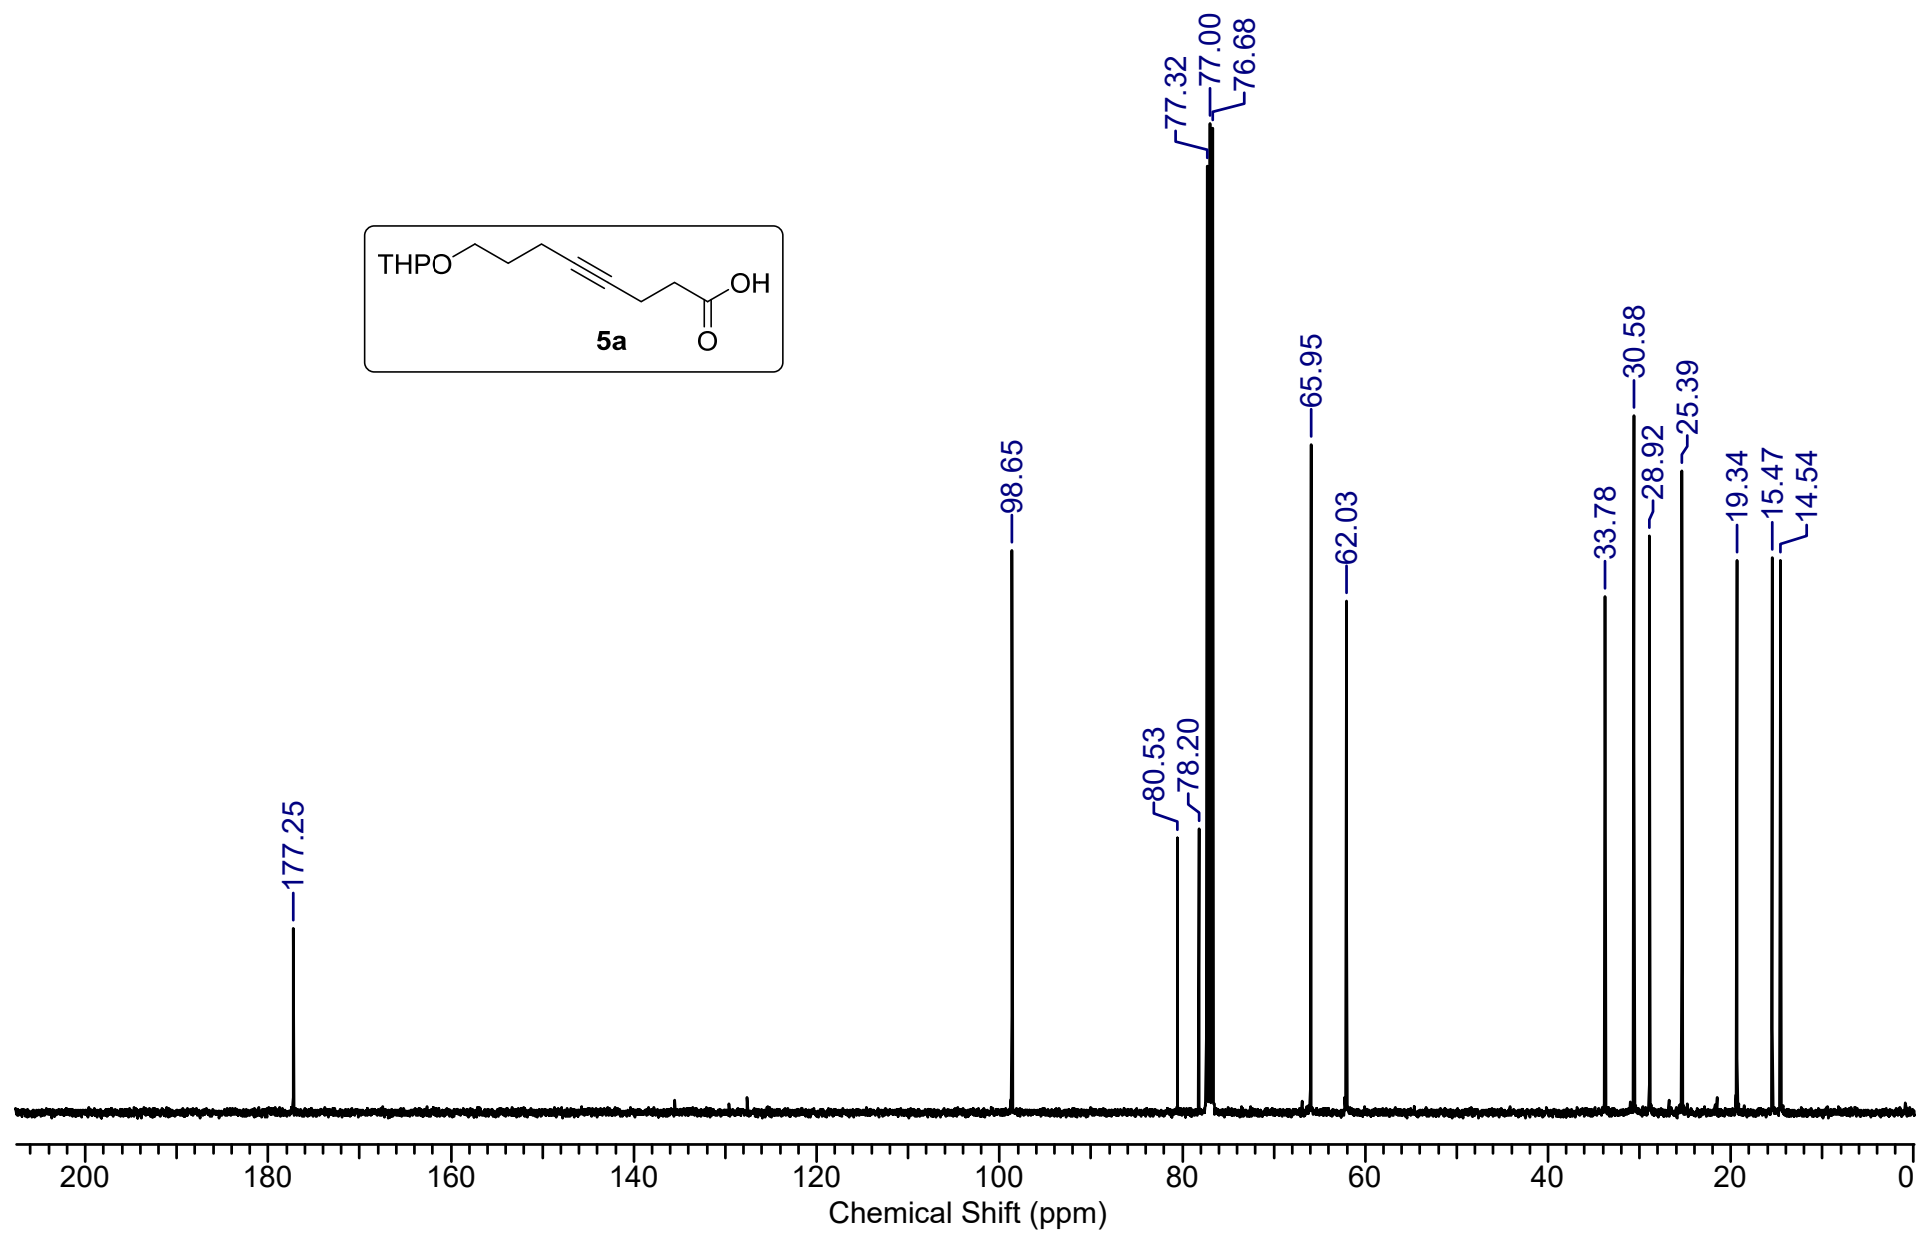

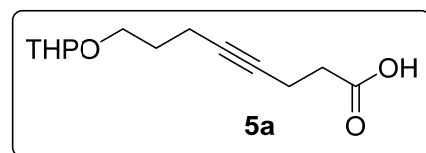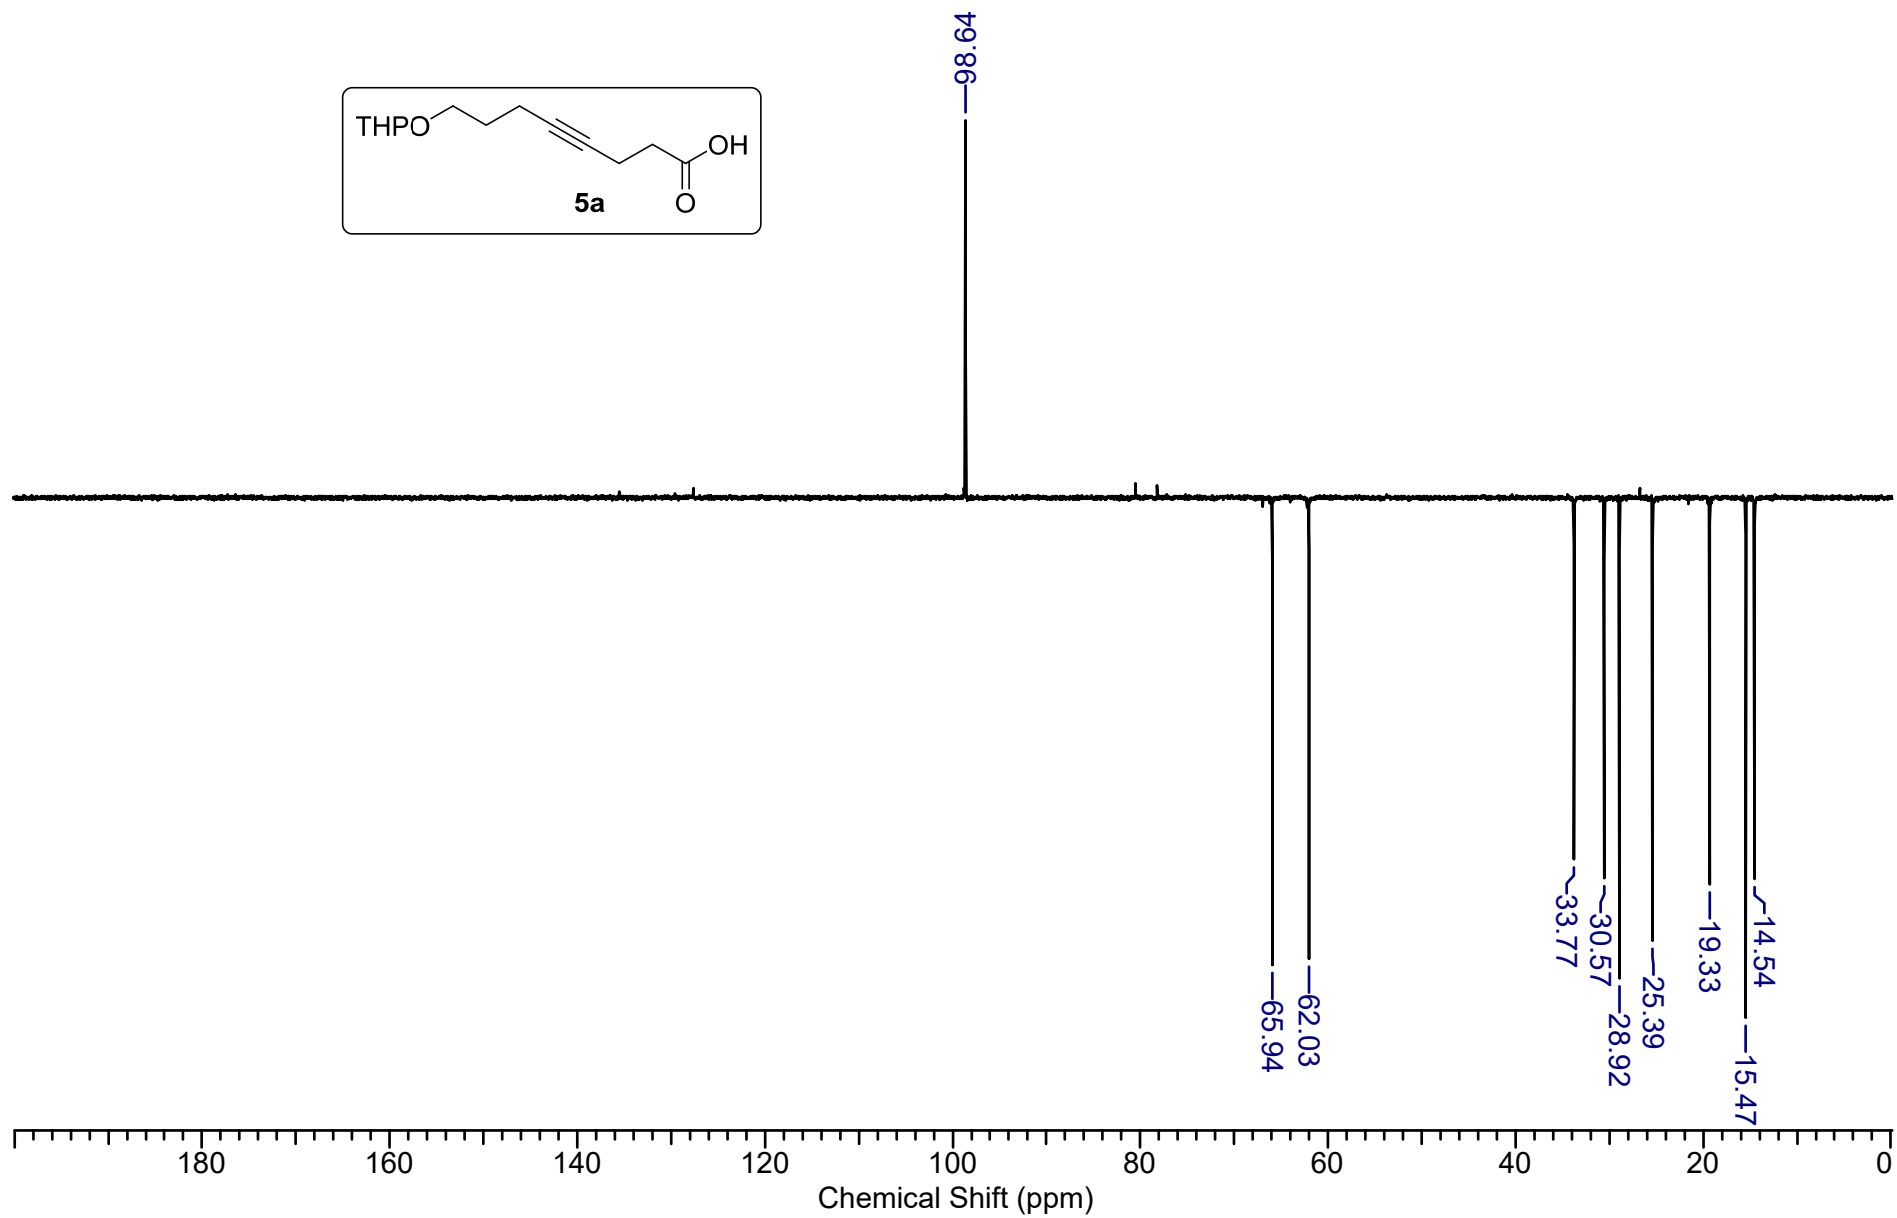

MSH-44 #308 RT: 1.67 AV: 1 NL: 2.05E6  
T: FTMS + p ESI Full ms [100.0000-1500.0000]

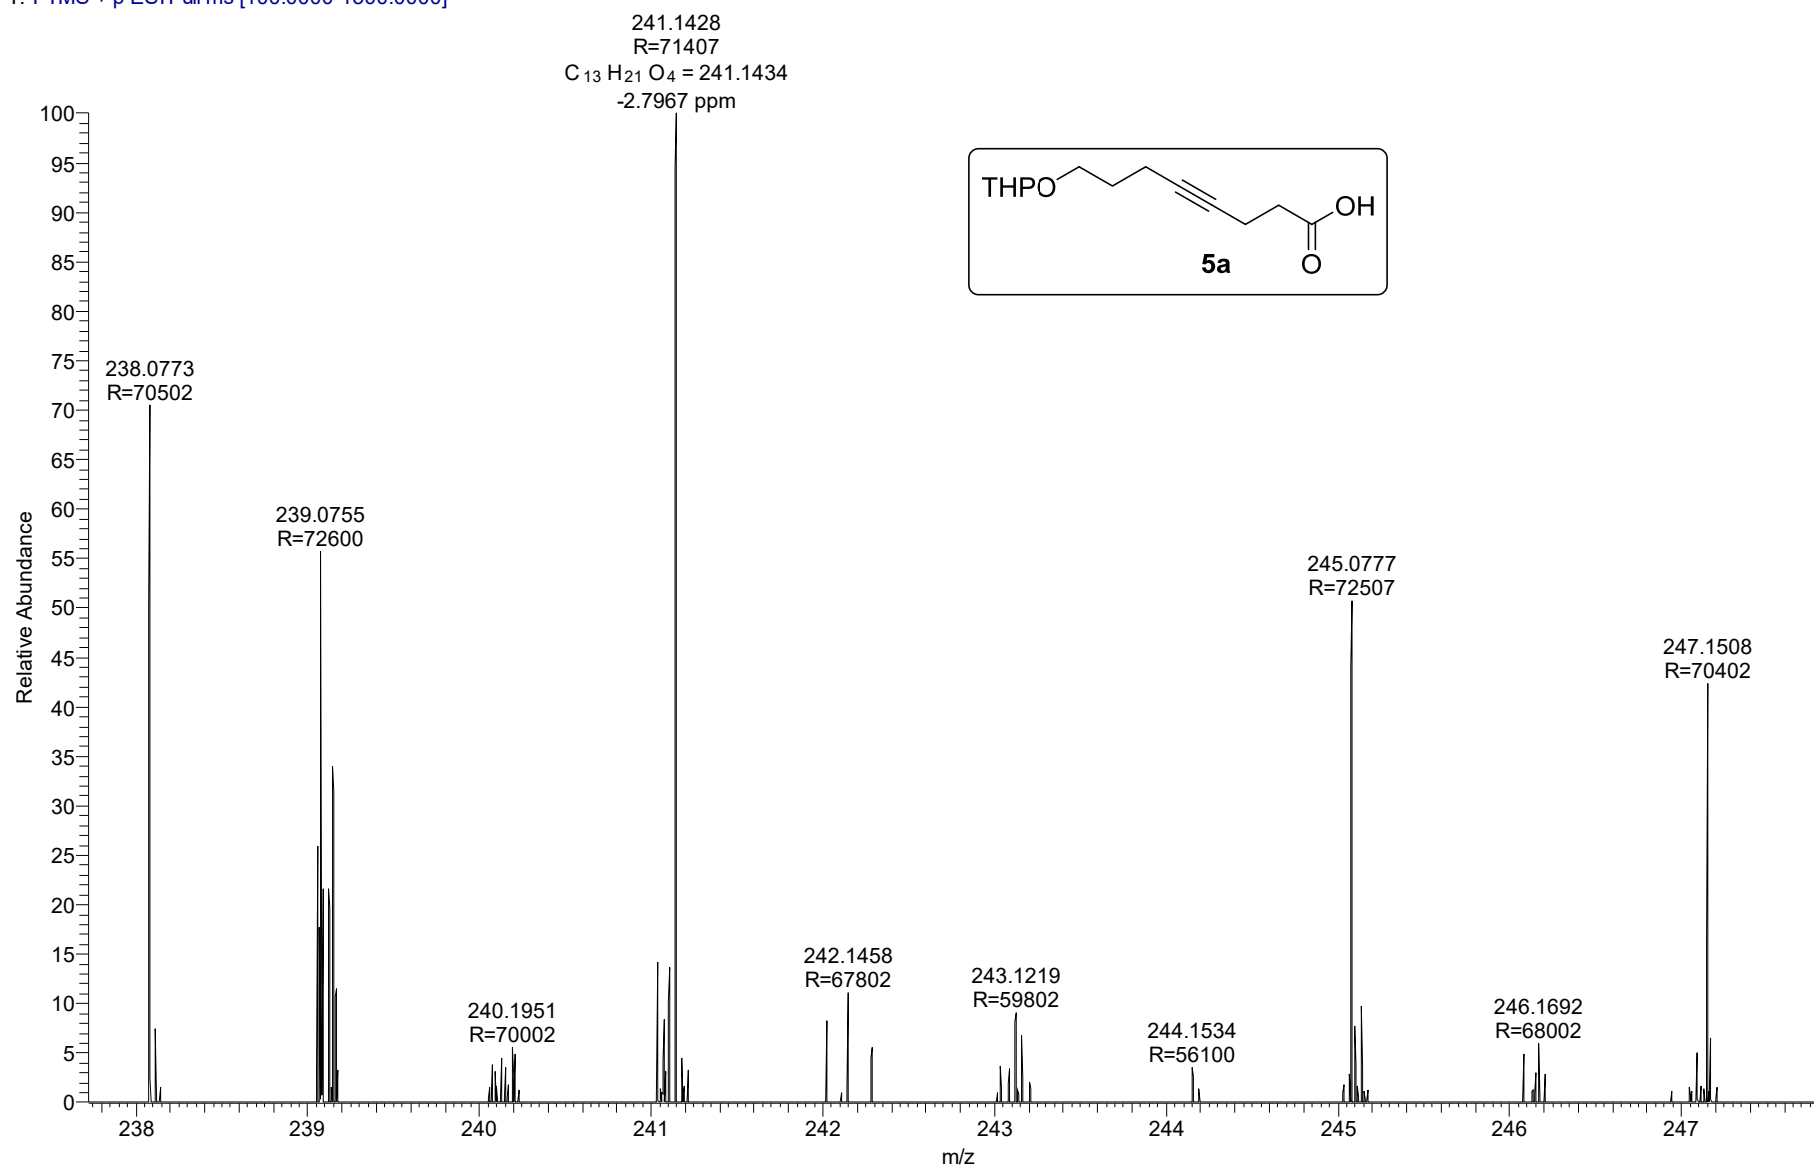

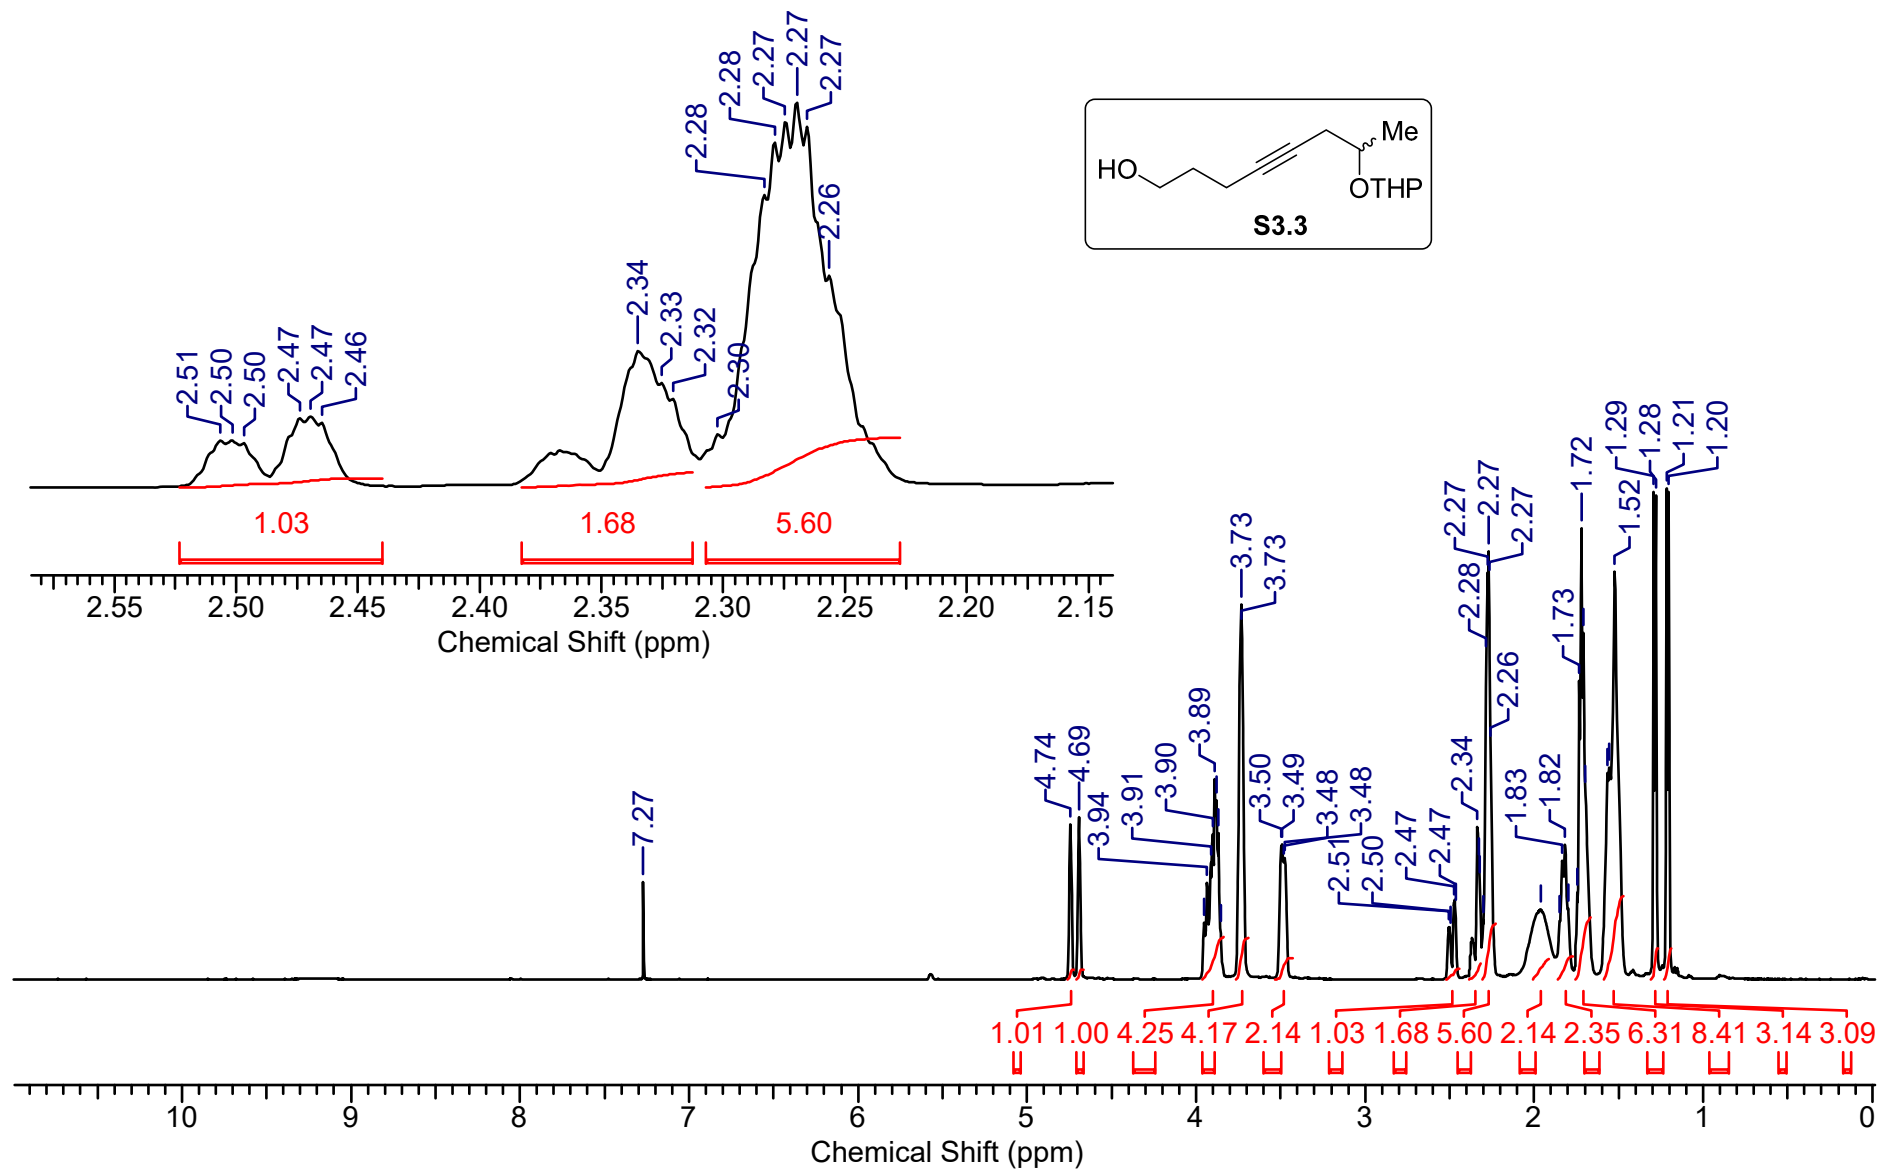

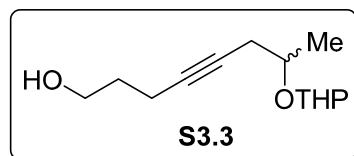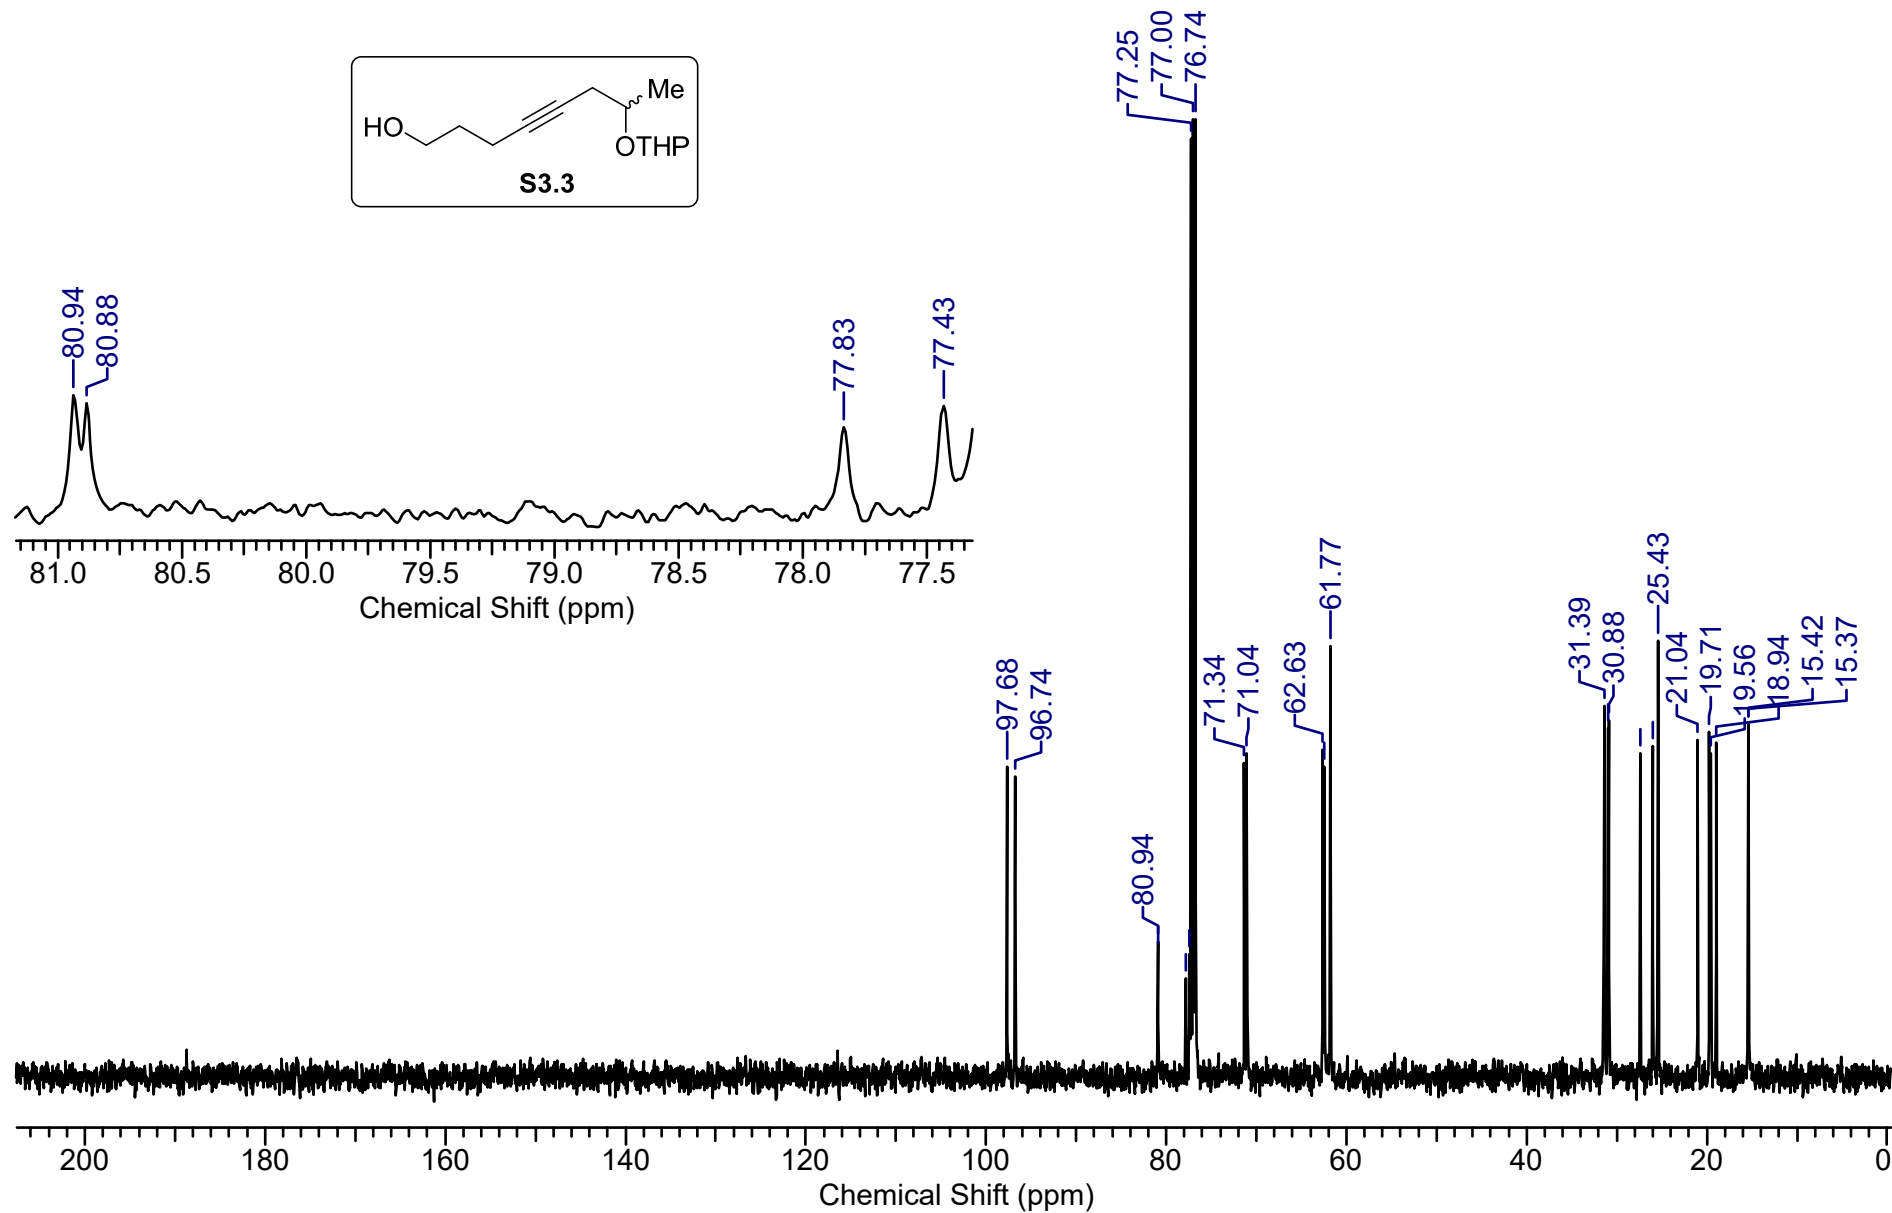

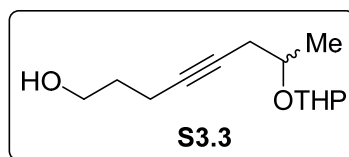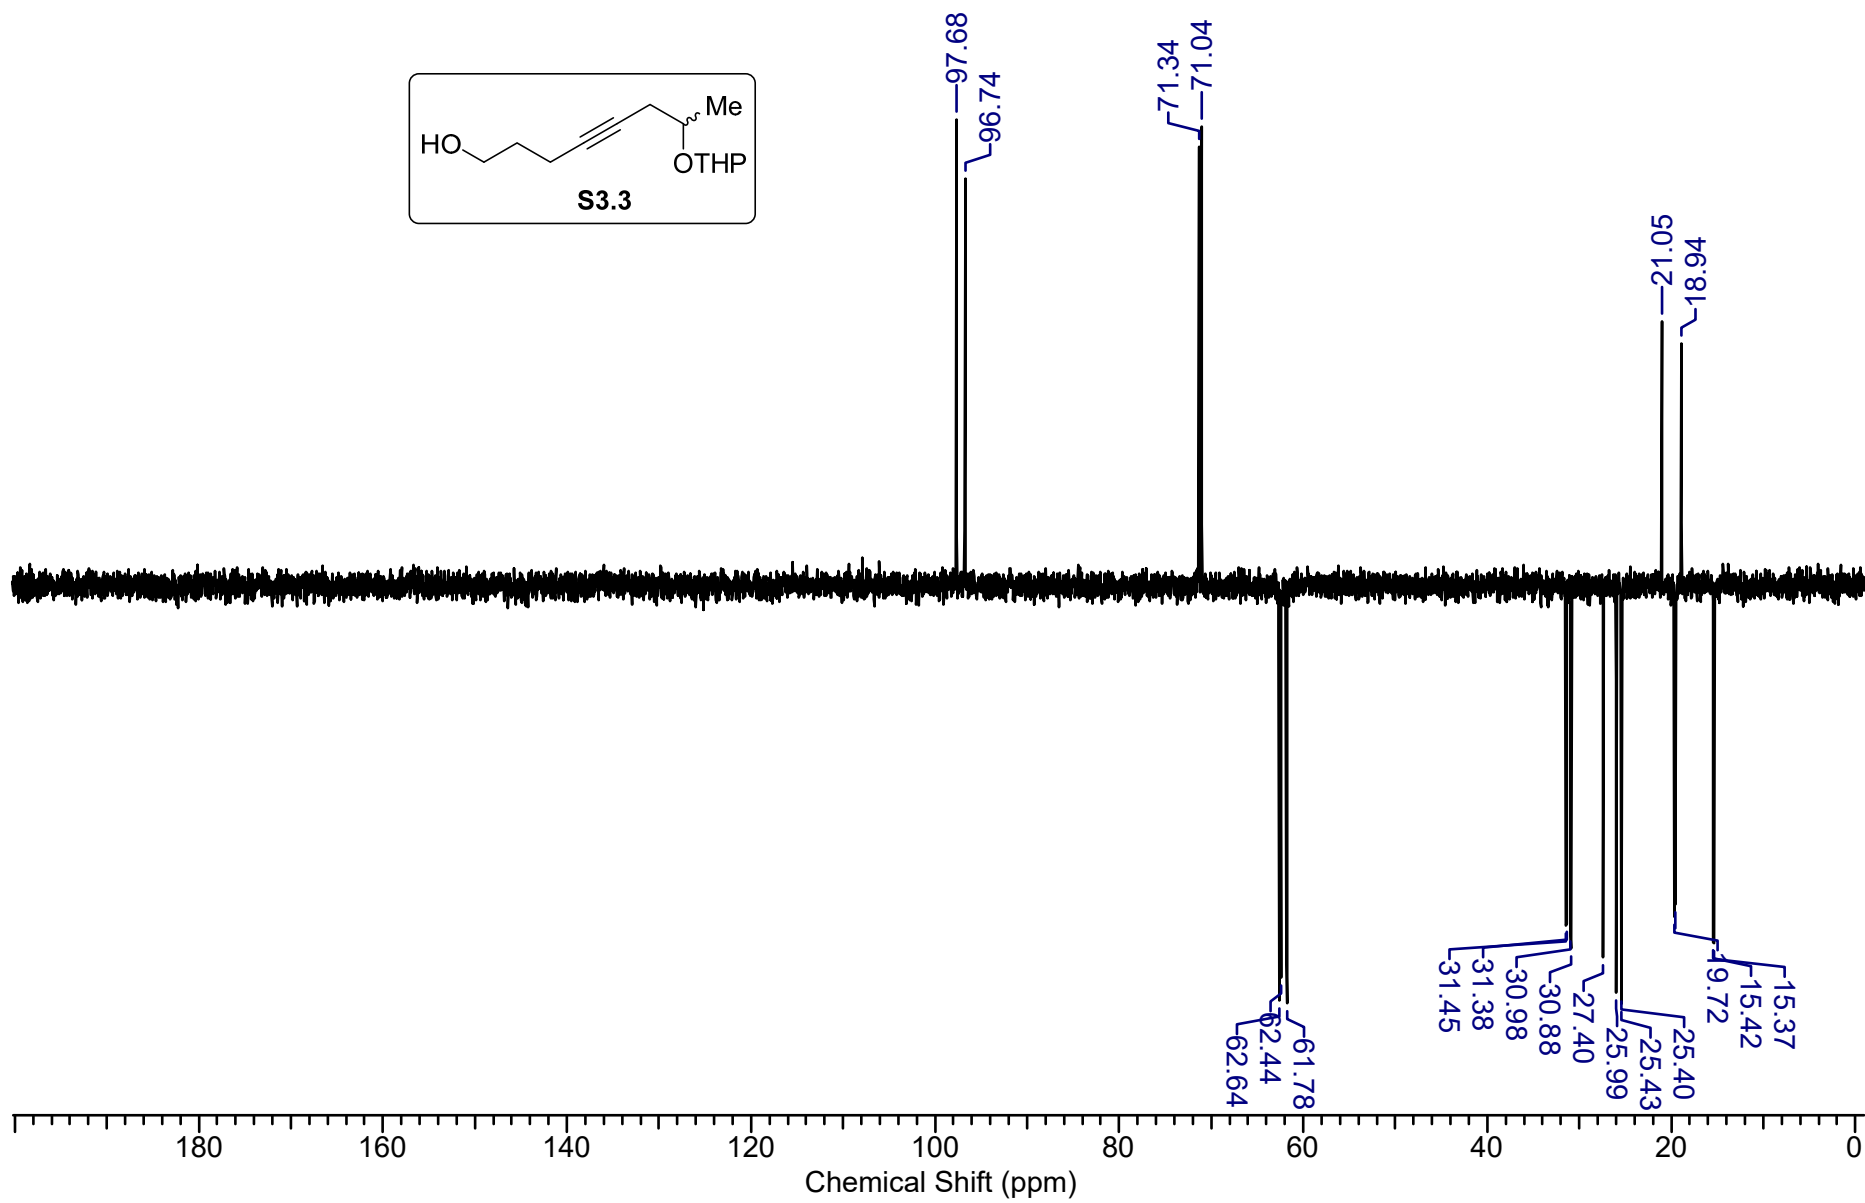

MSH-101 #339 RT: 1.83 AV: 1 NL: 2.19E9  
T: FTMS + p ESI Full ms [100.0000-1500.0000]

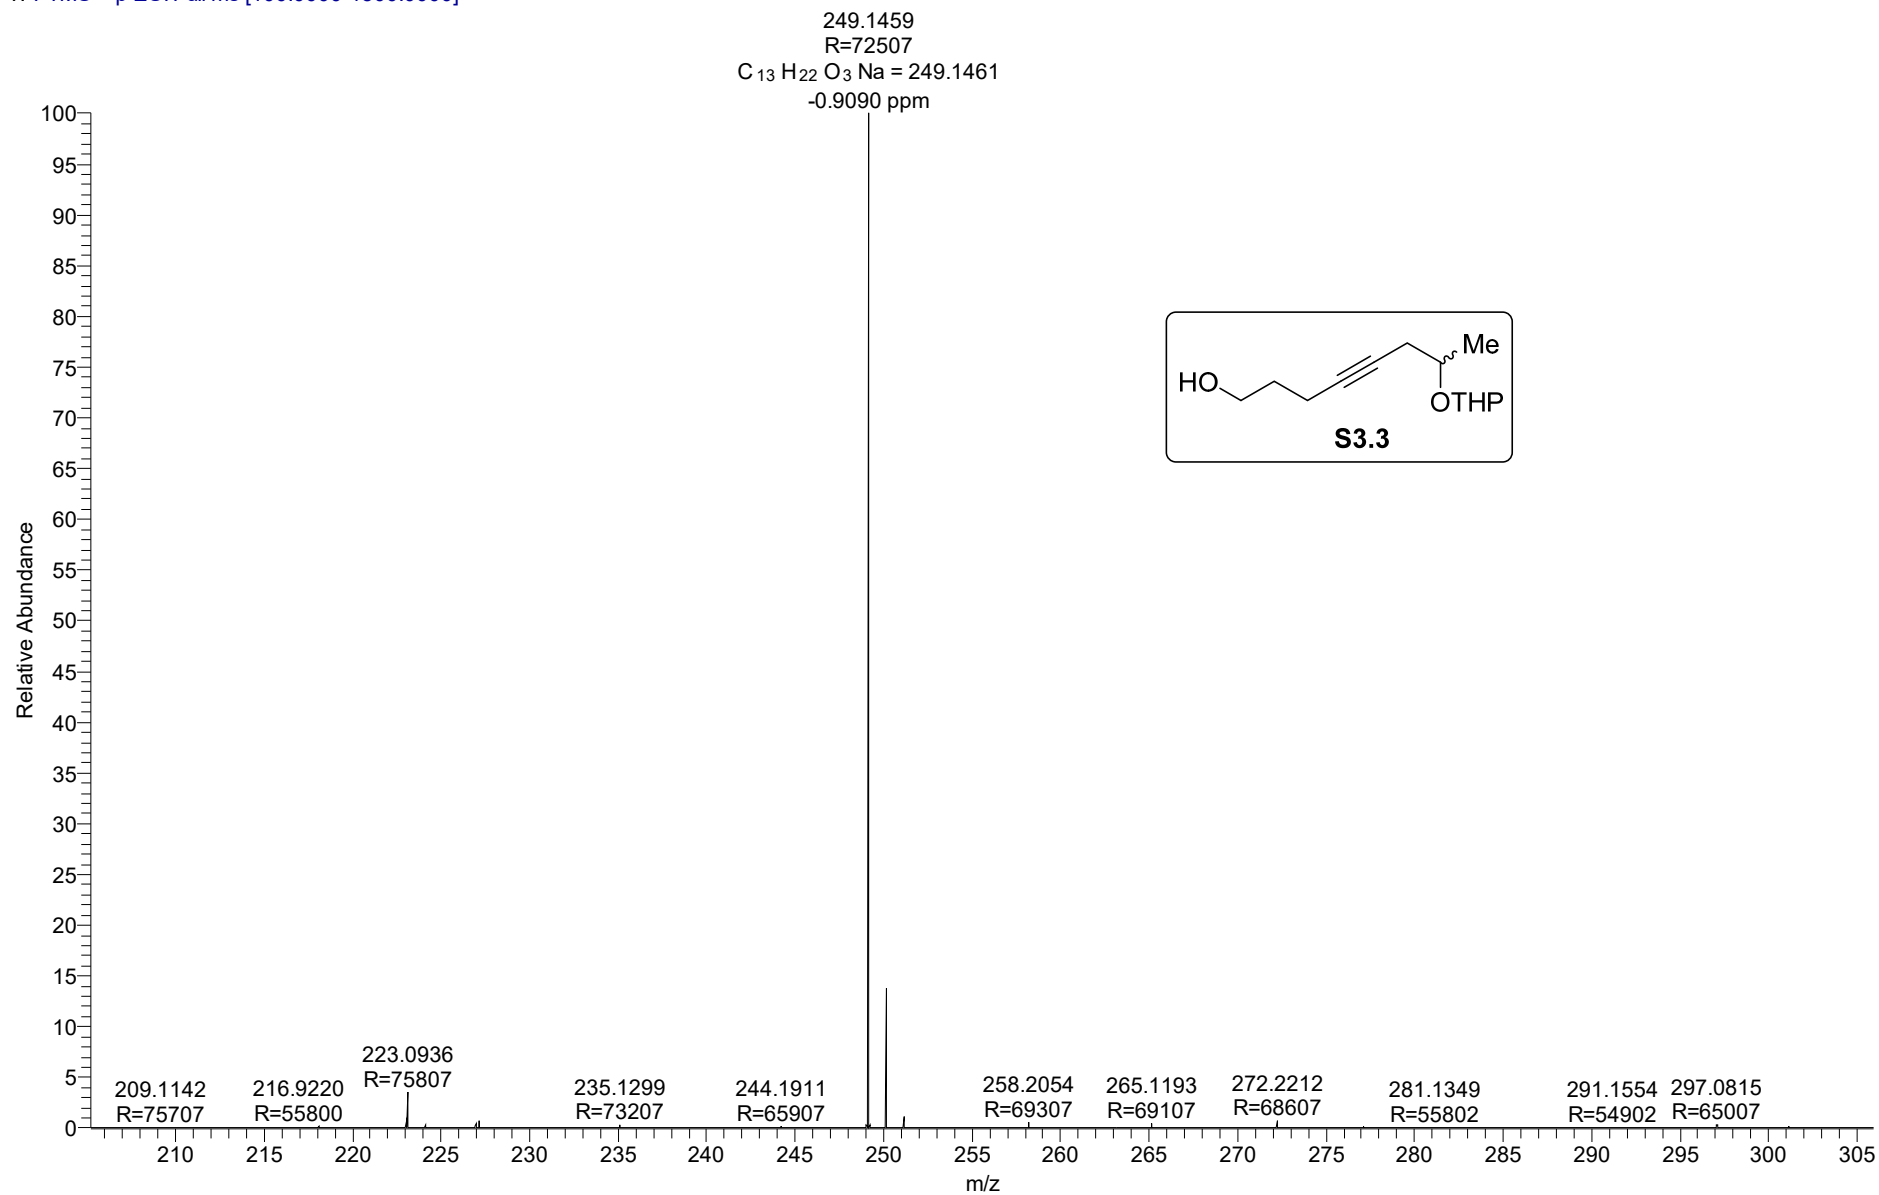

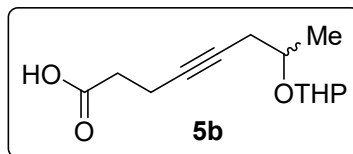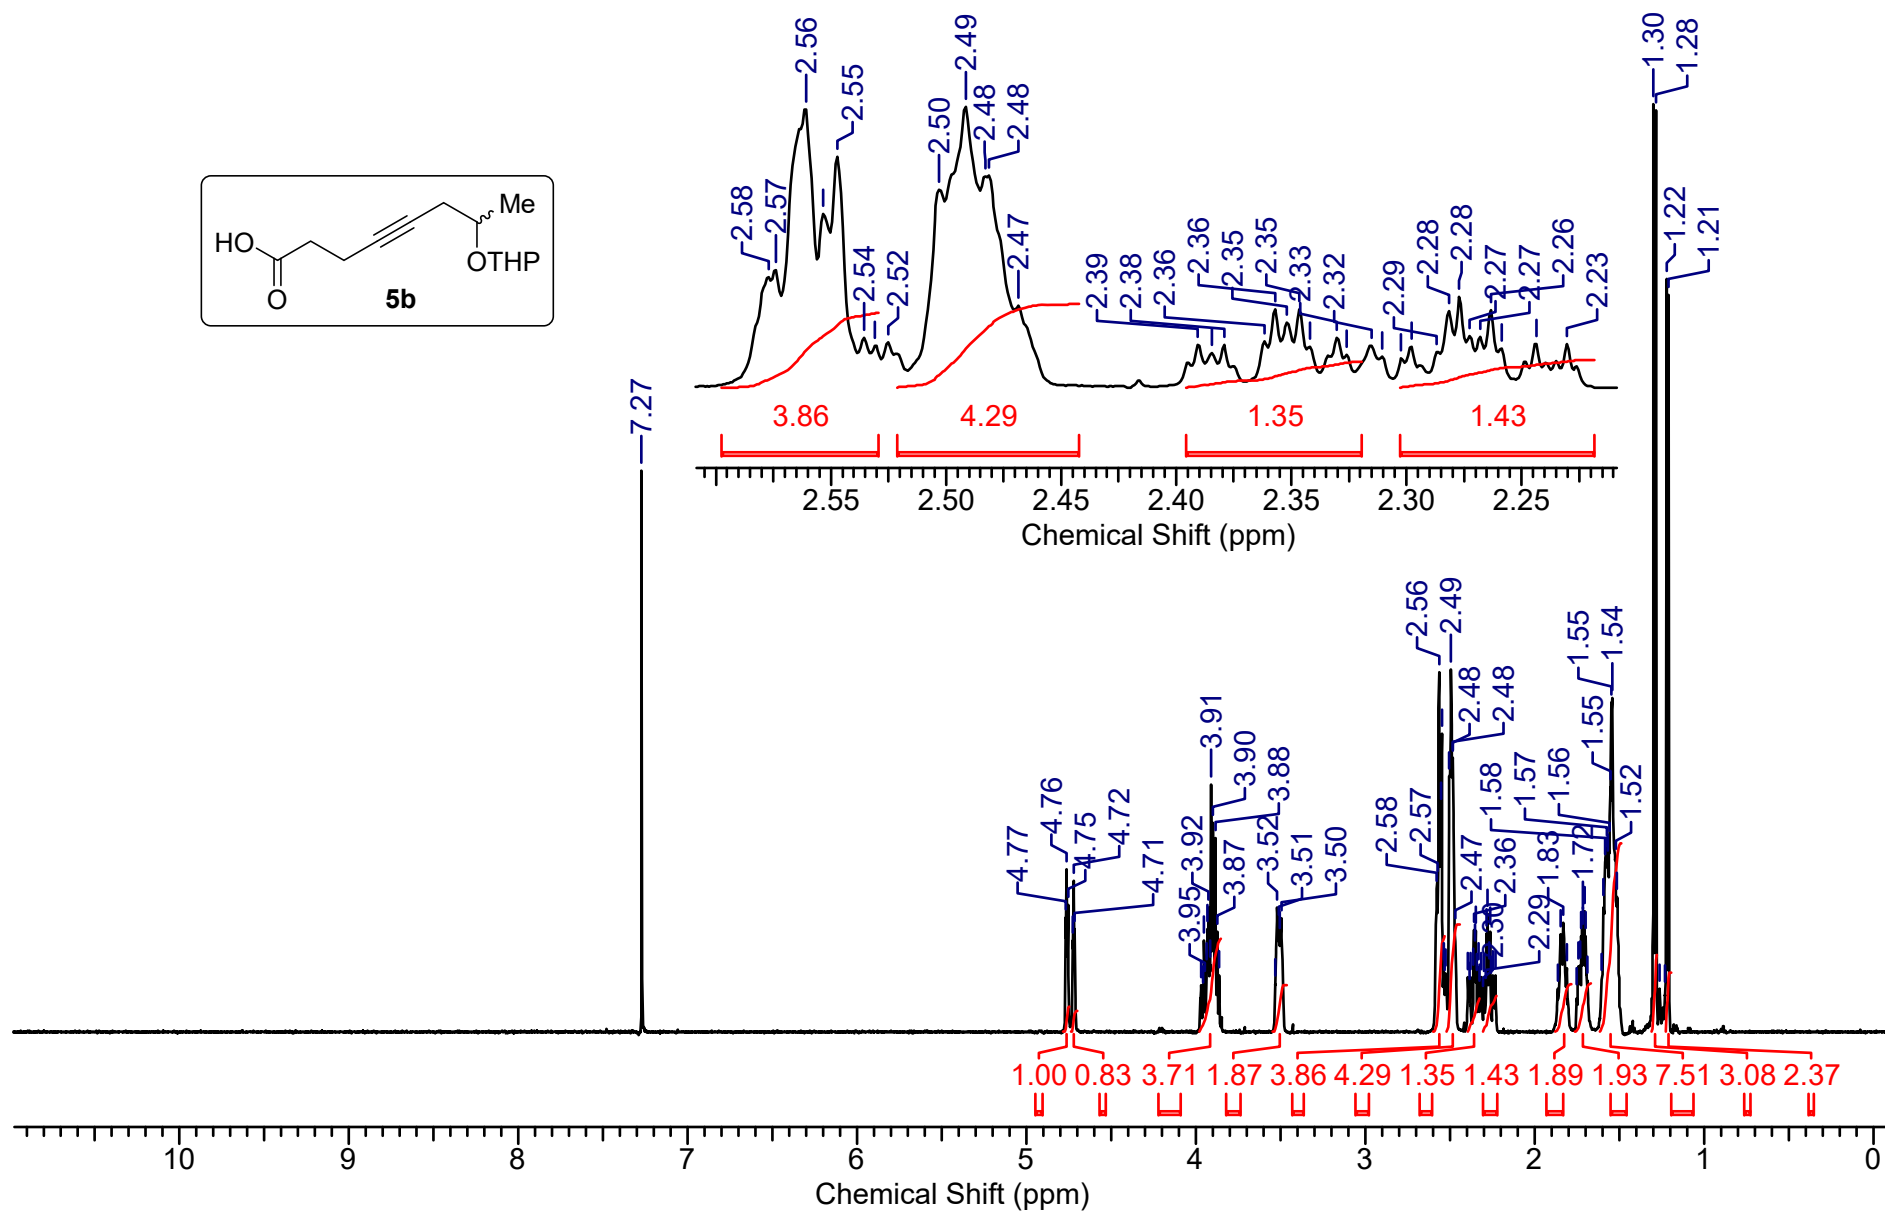



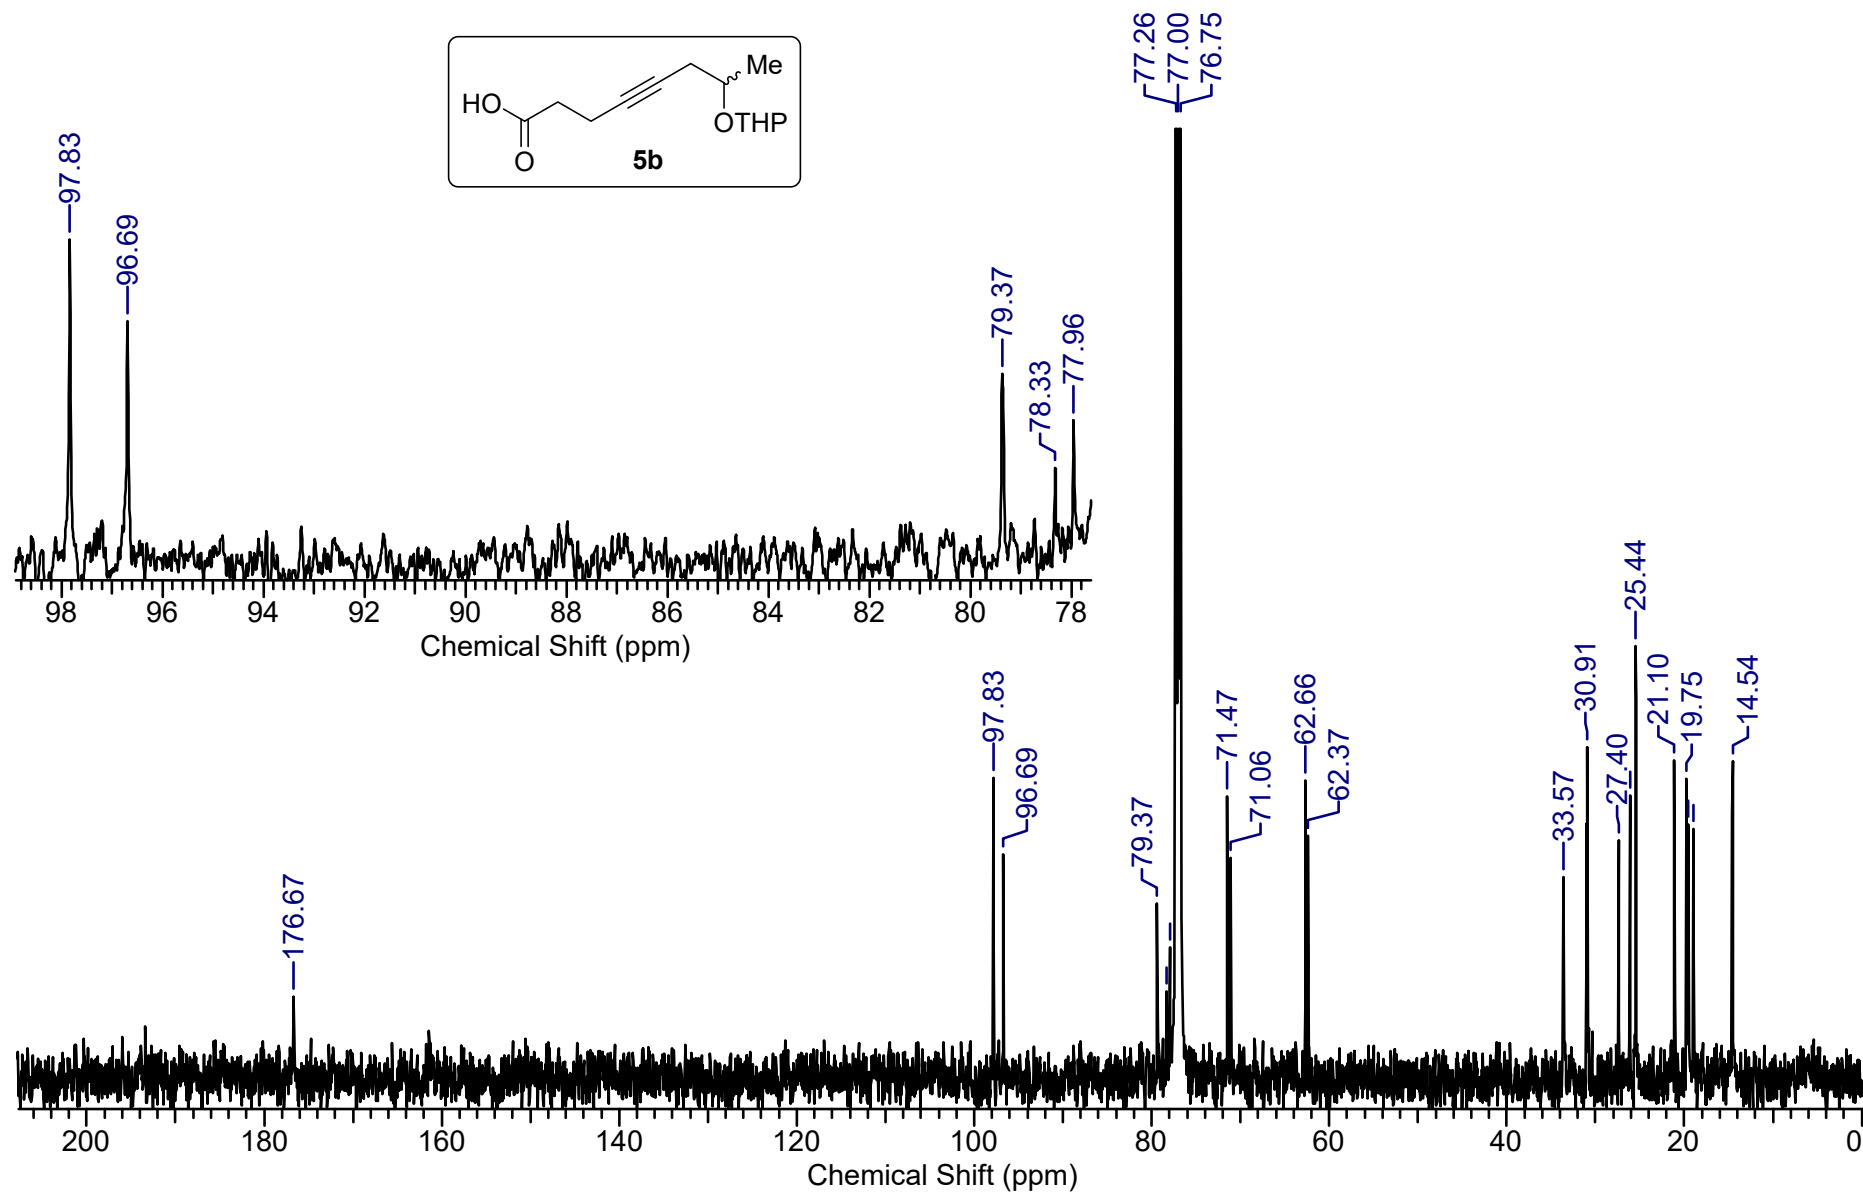

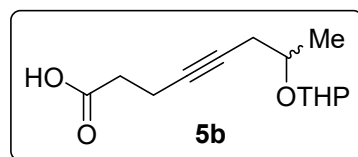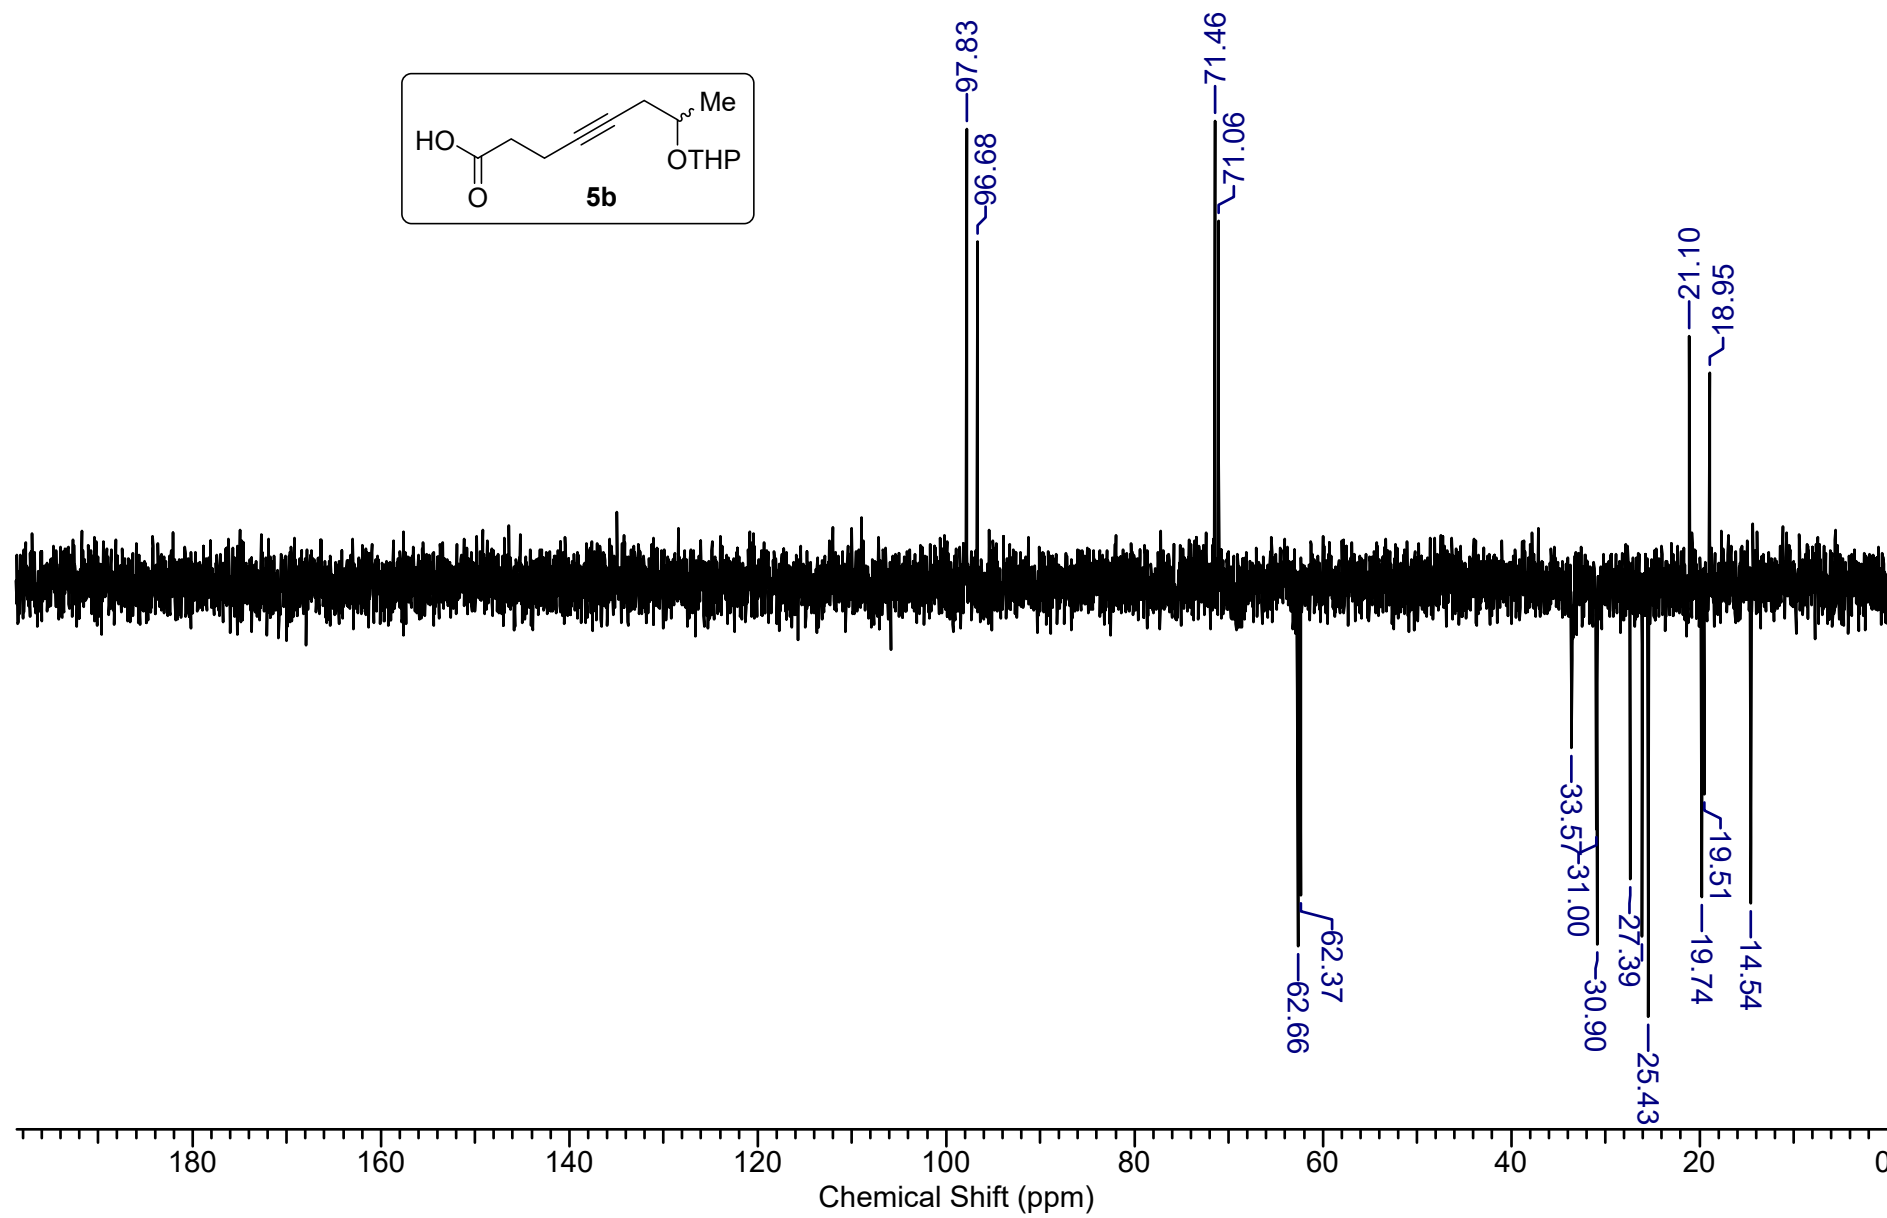

MSH-45 #269 RT: 1.47 AV: 1 NL: 7.55E8  
T: FTMS + p ESI Full ms [100.0000-1500.0000]

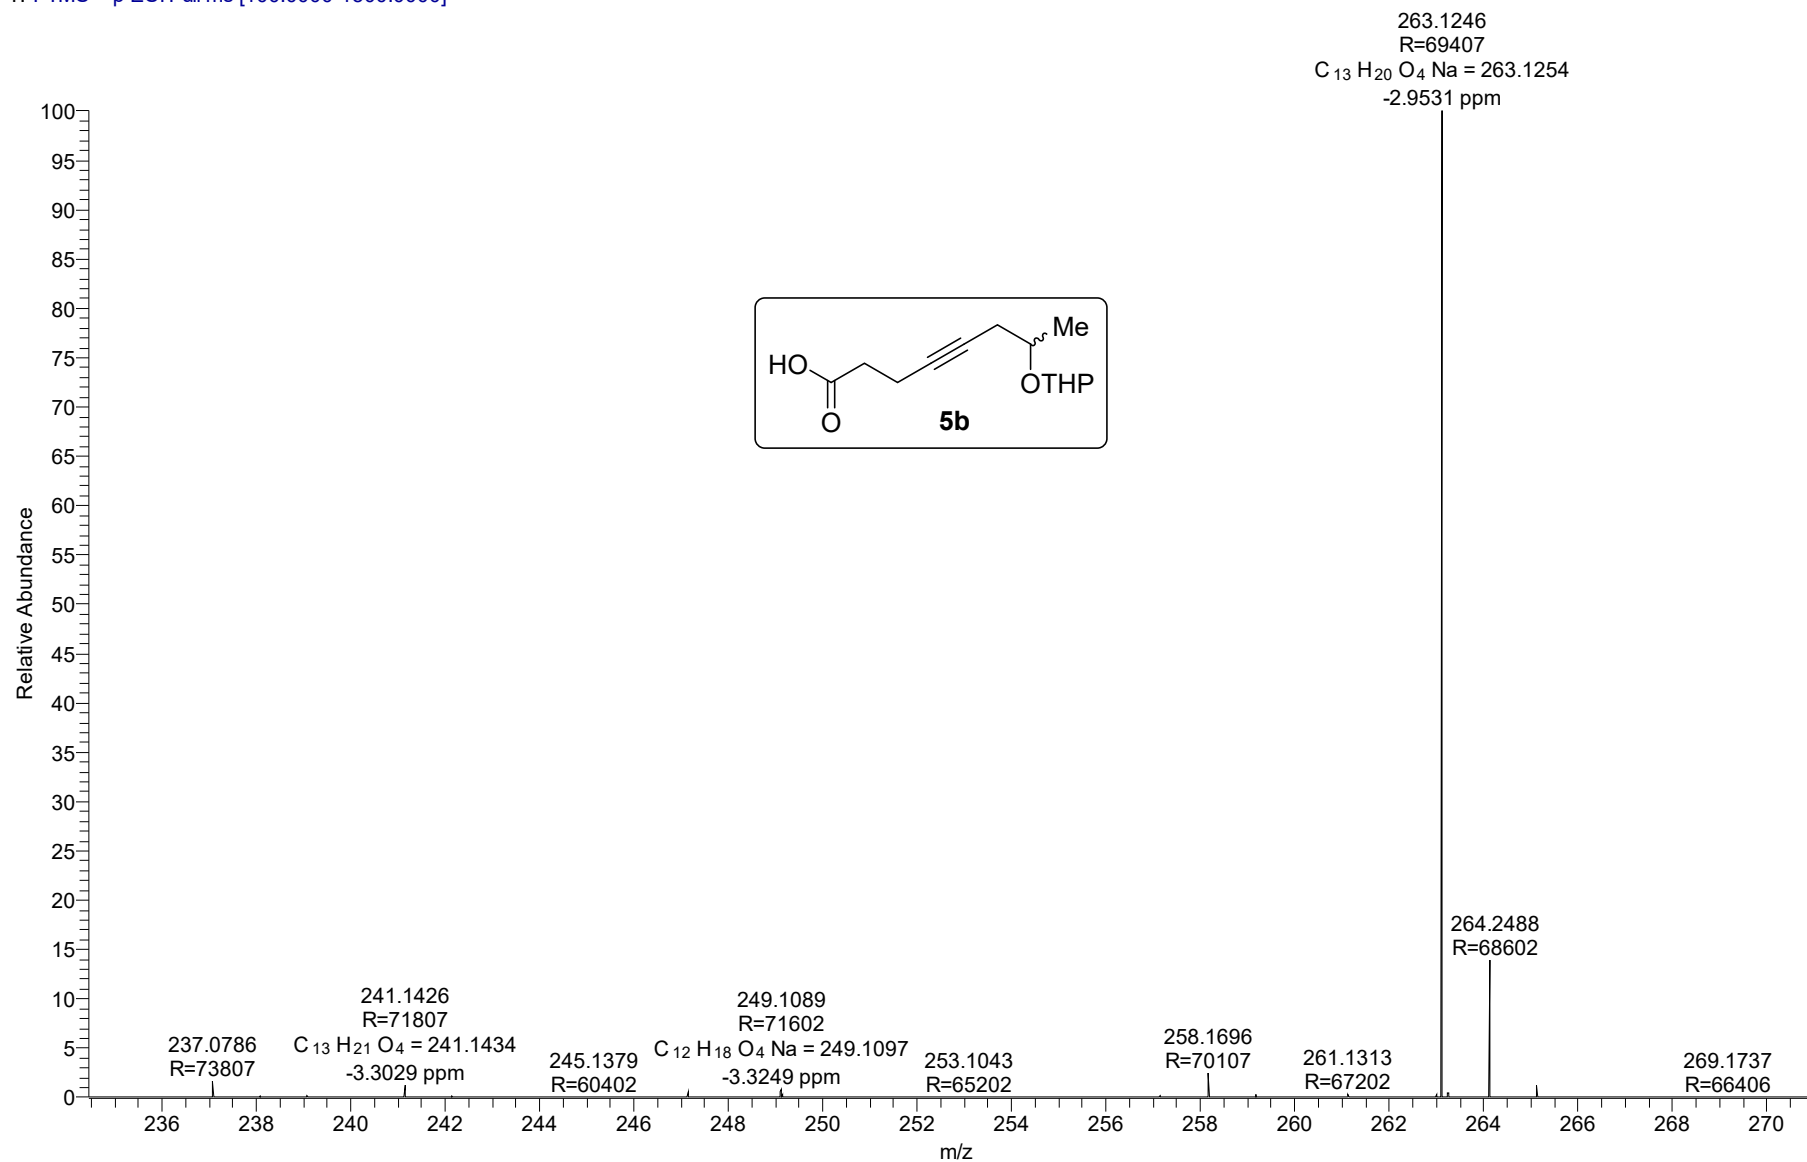

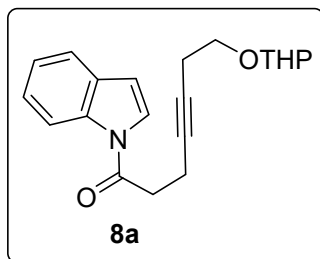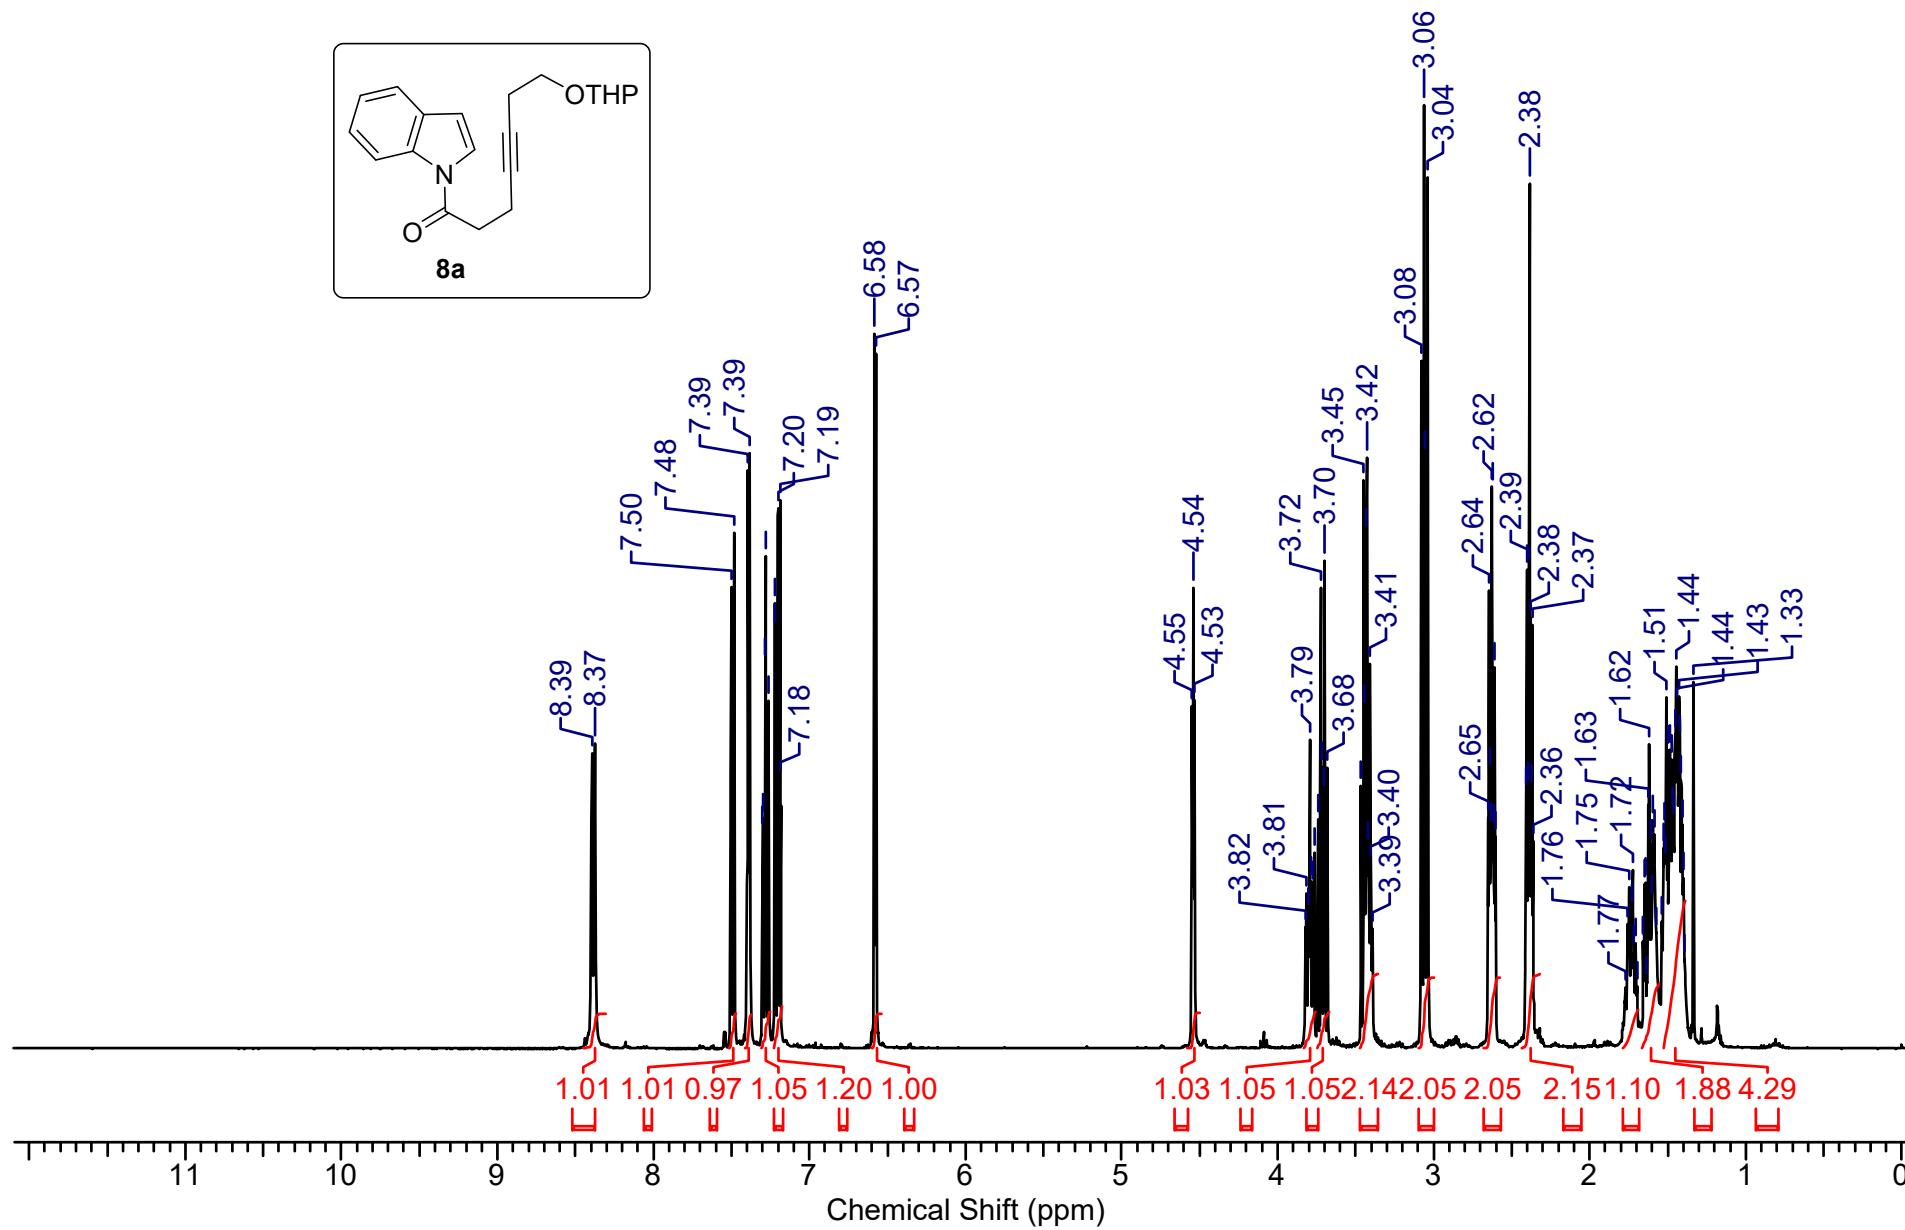

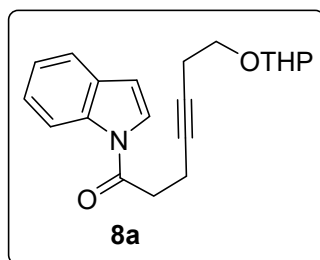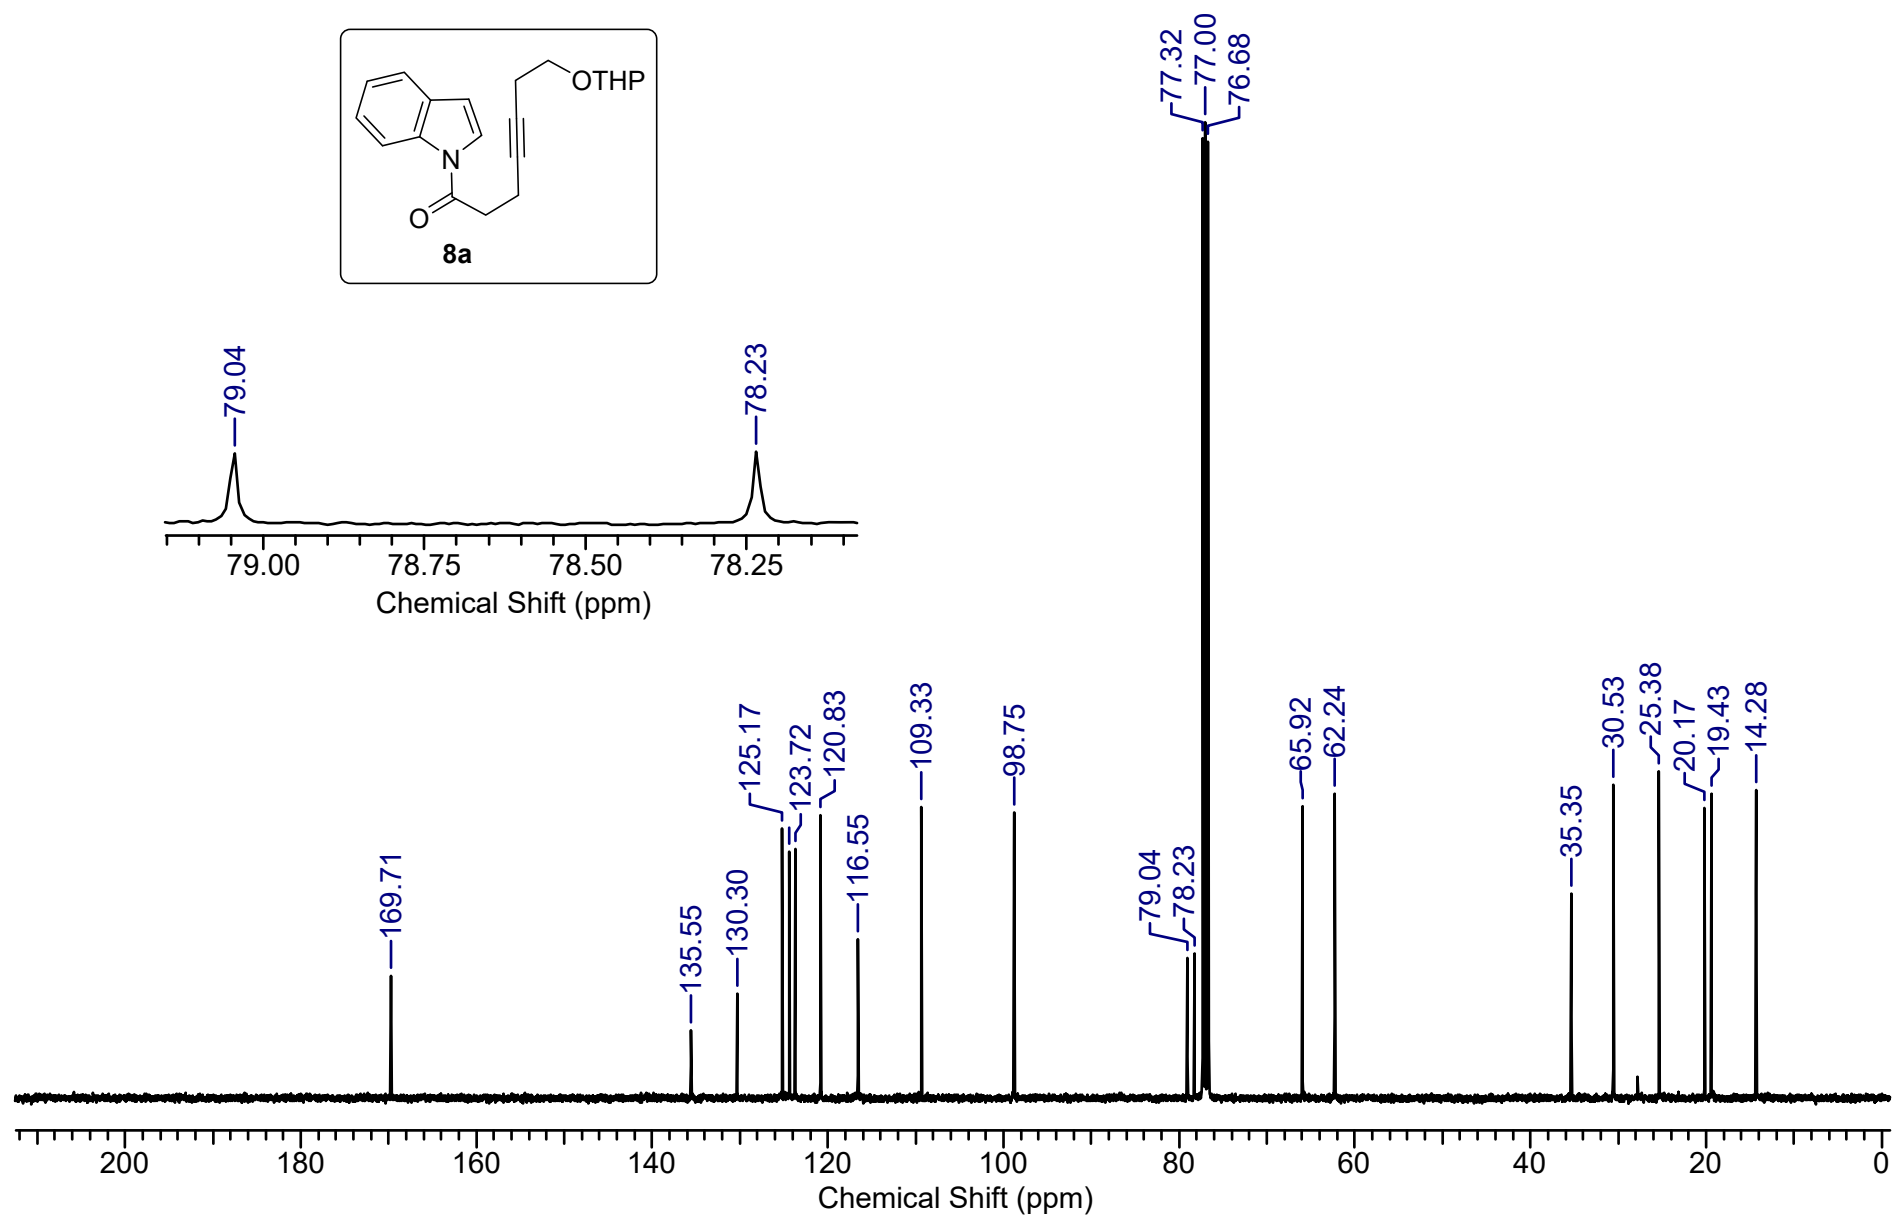

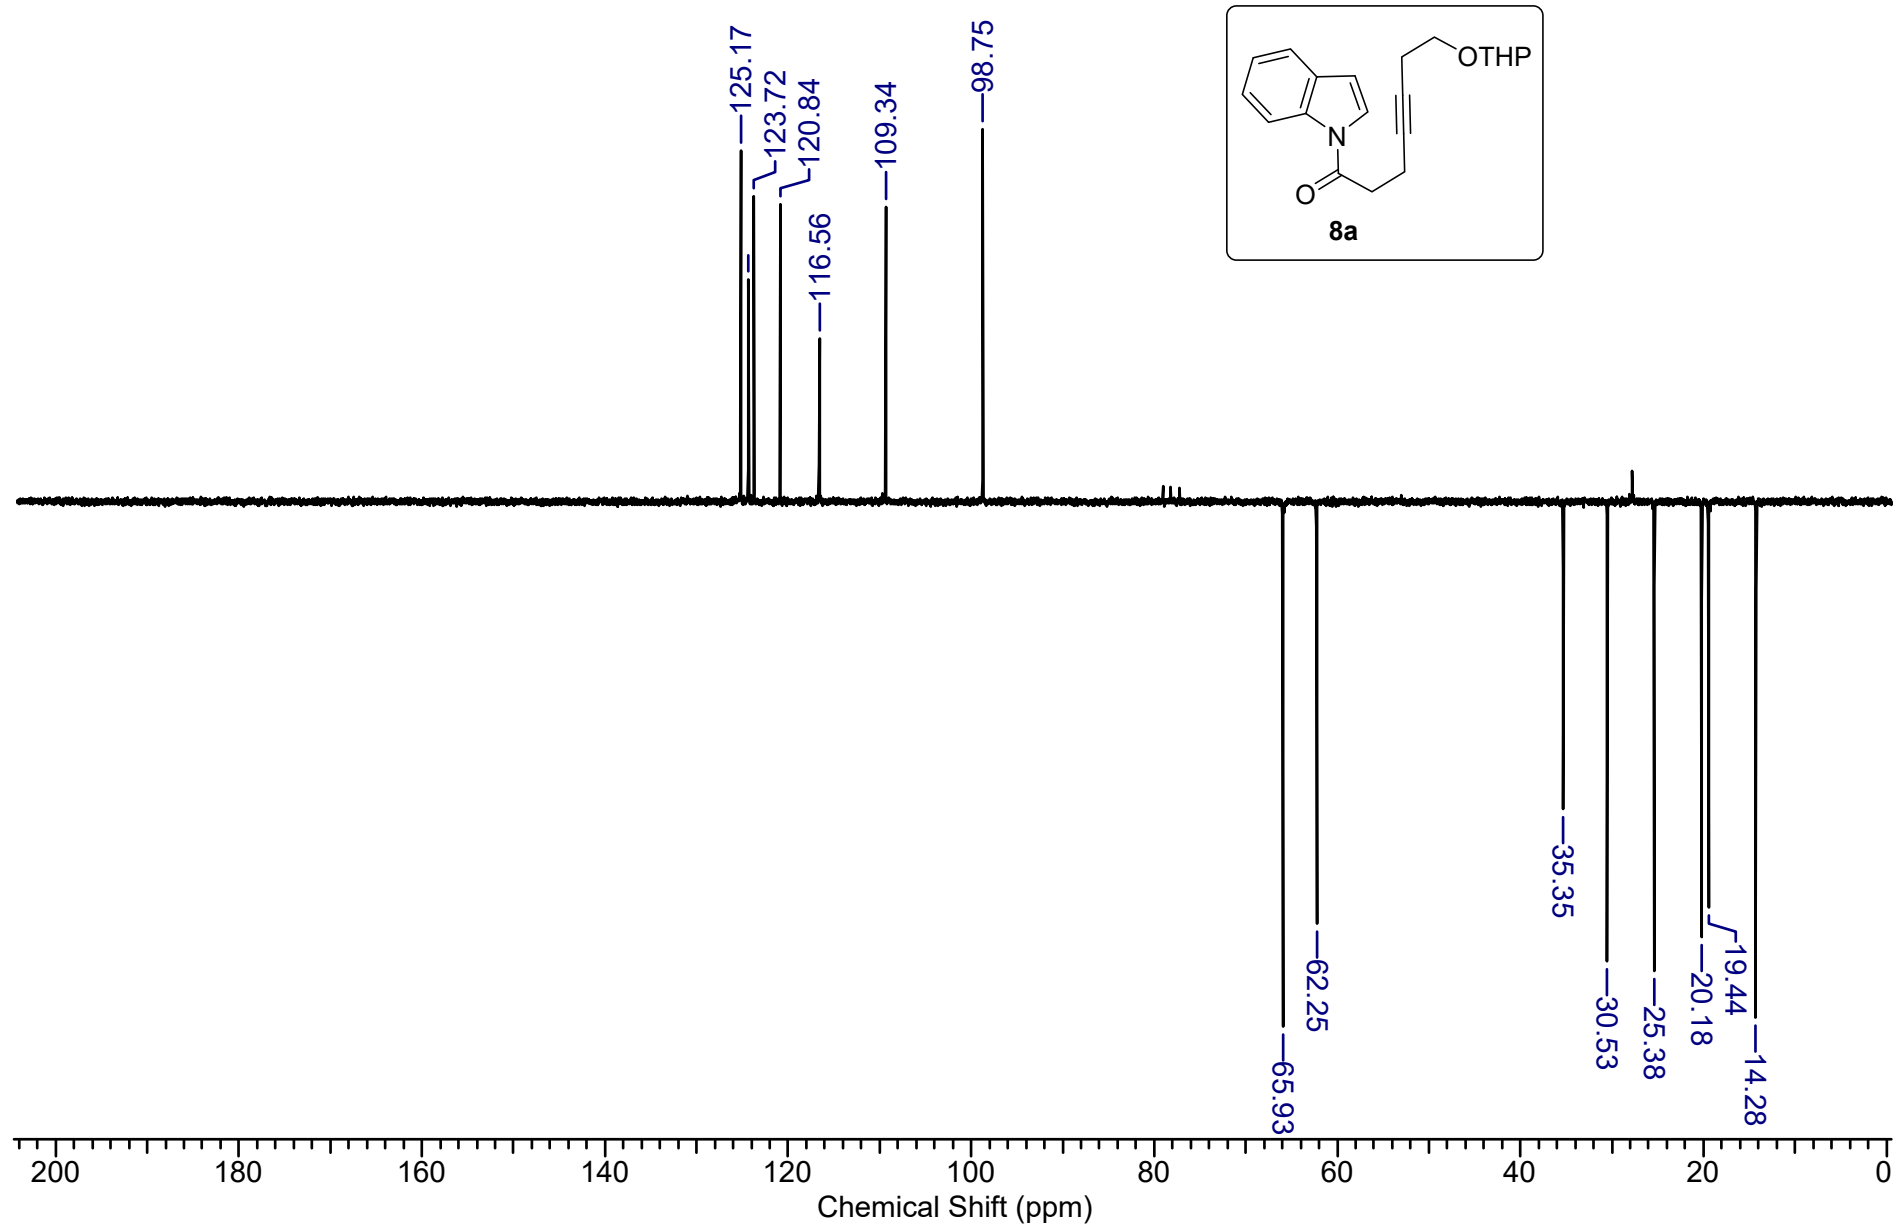

M-5 #498 RT: 2.92 AV: 1 NL: 9.09E7  
T: FTMS + p ESI Full ms [100.0000-1500.0000]

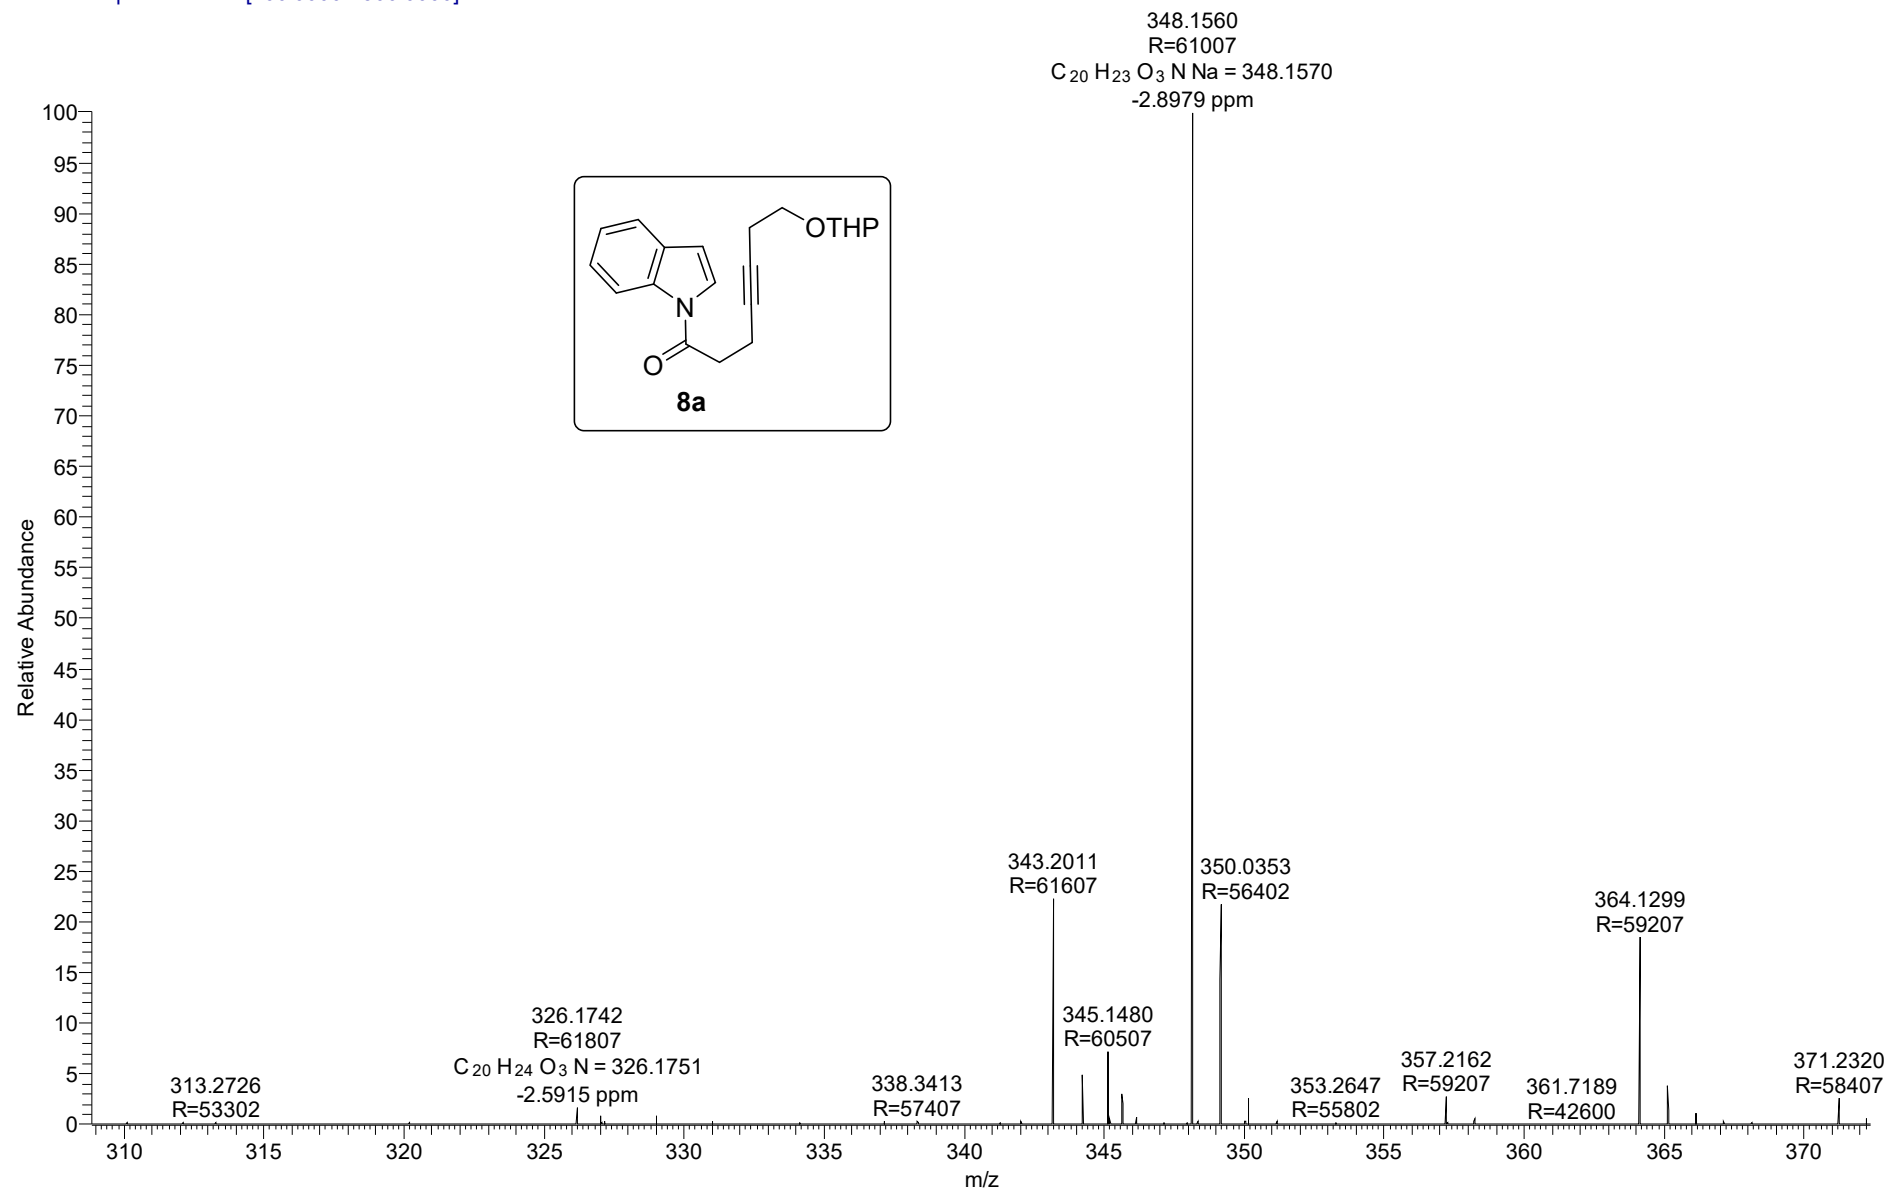

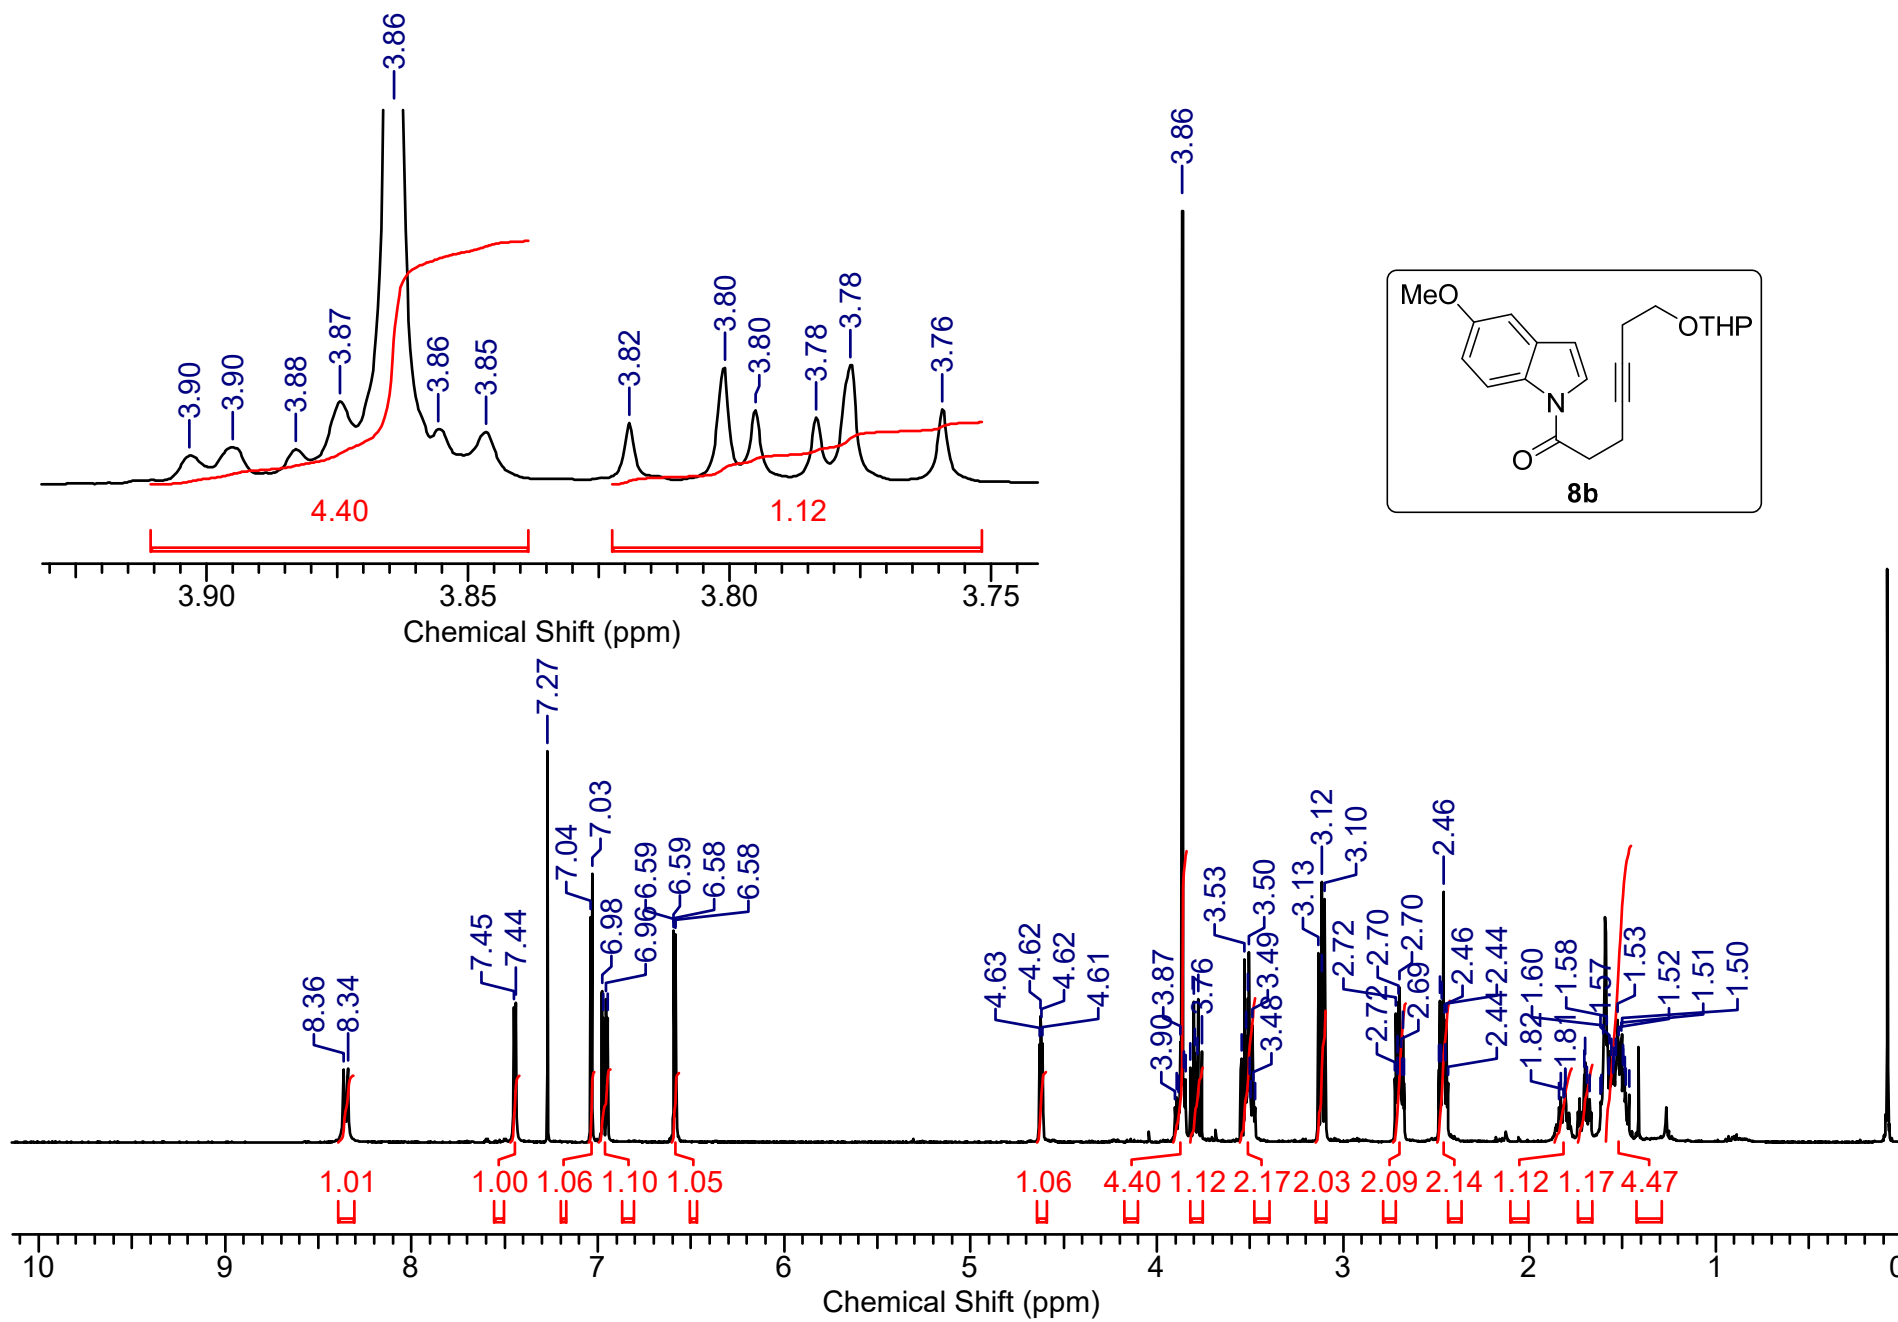



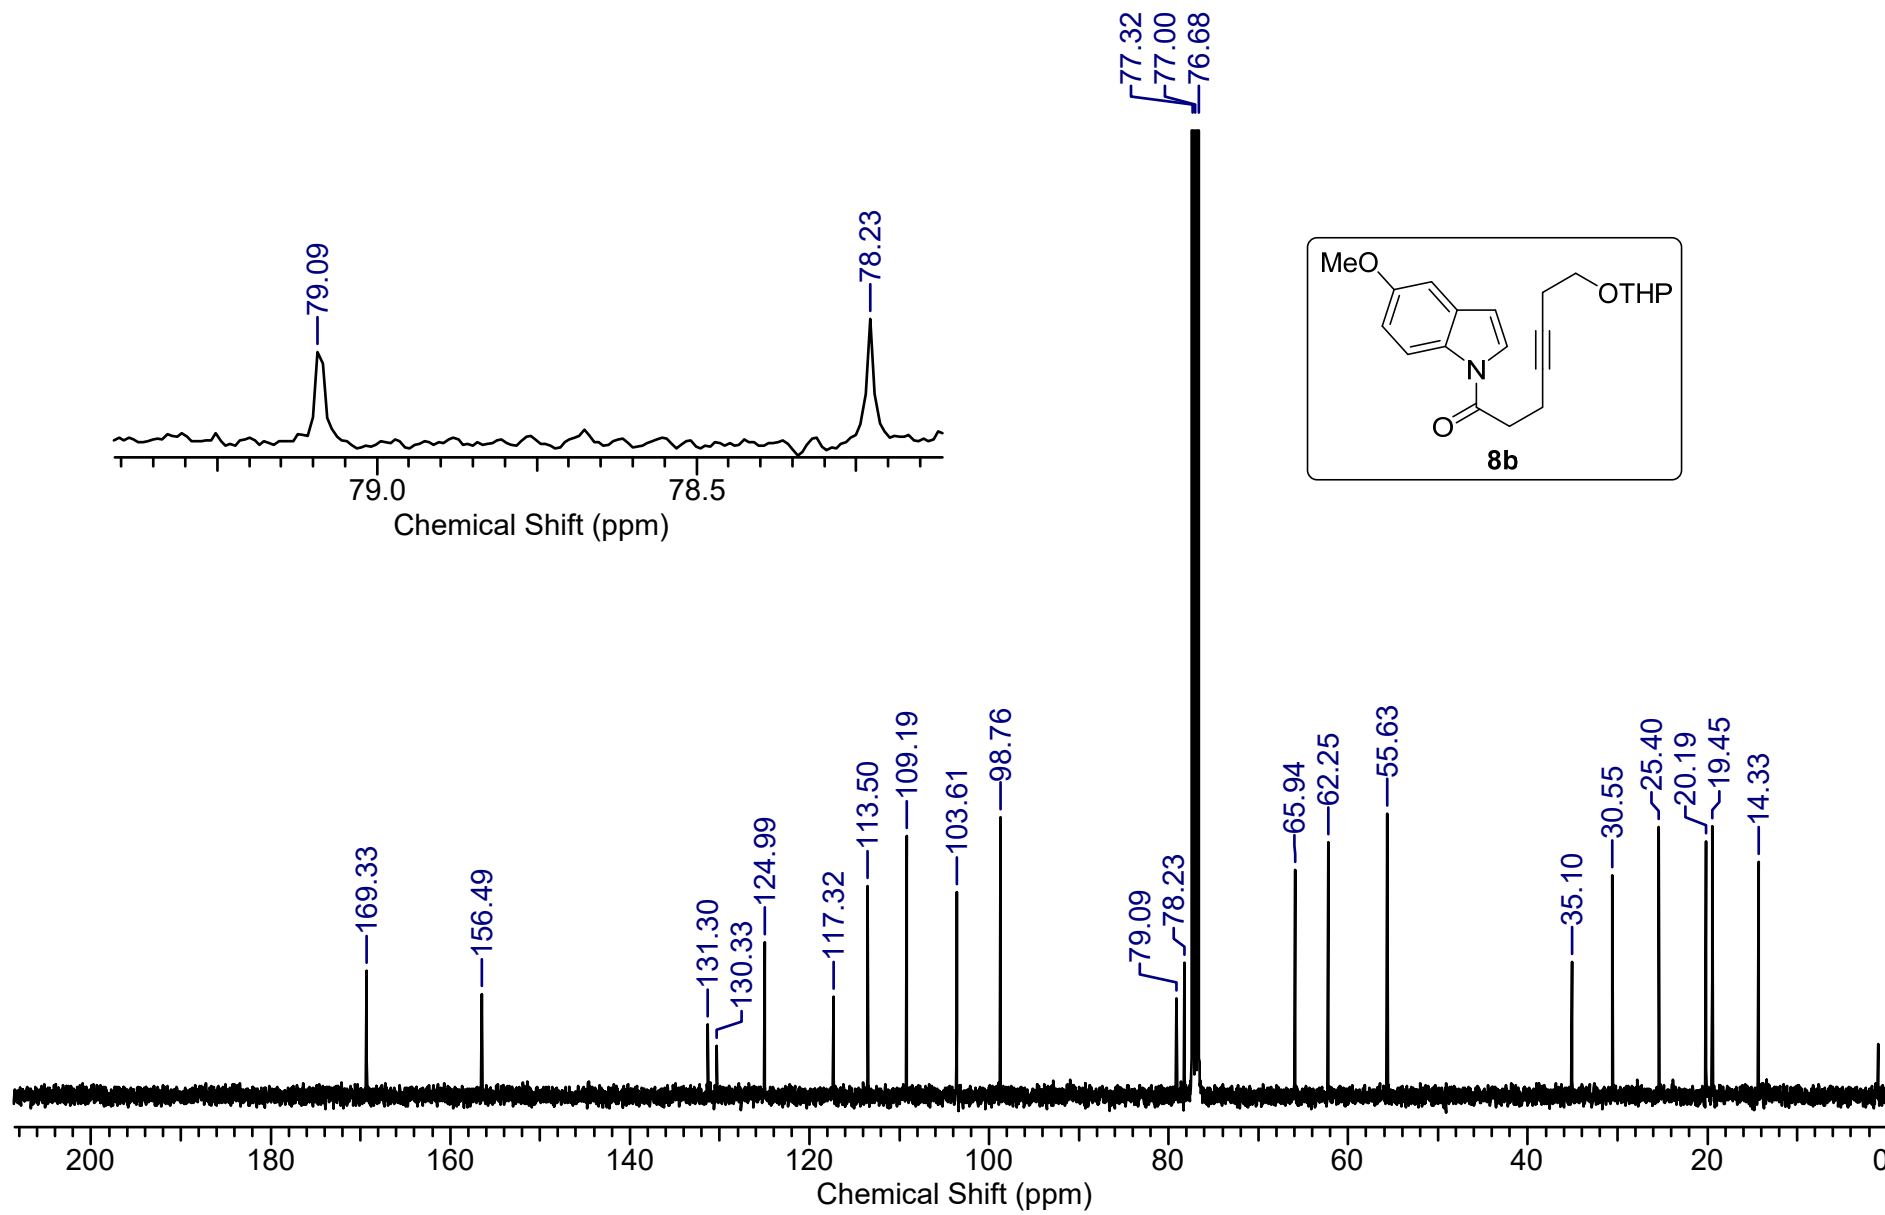

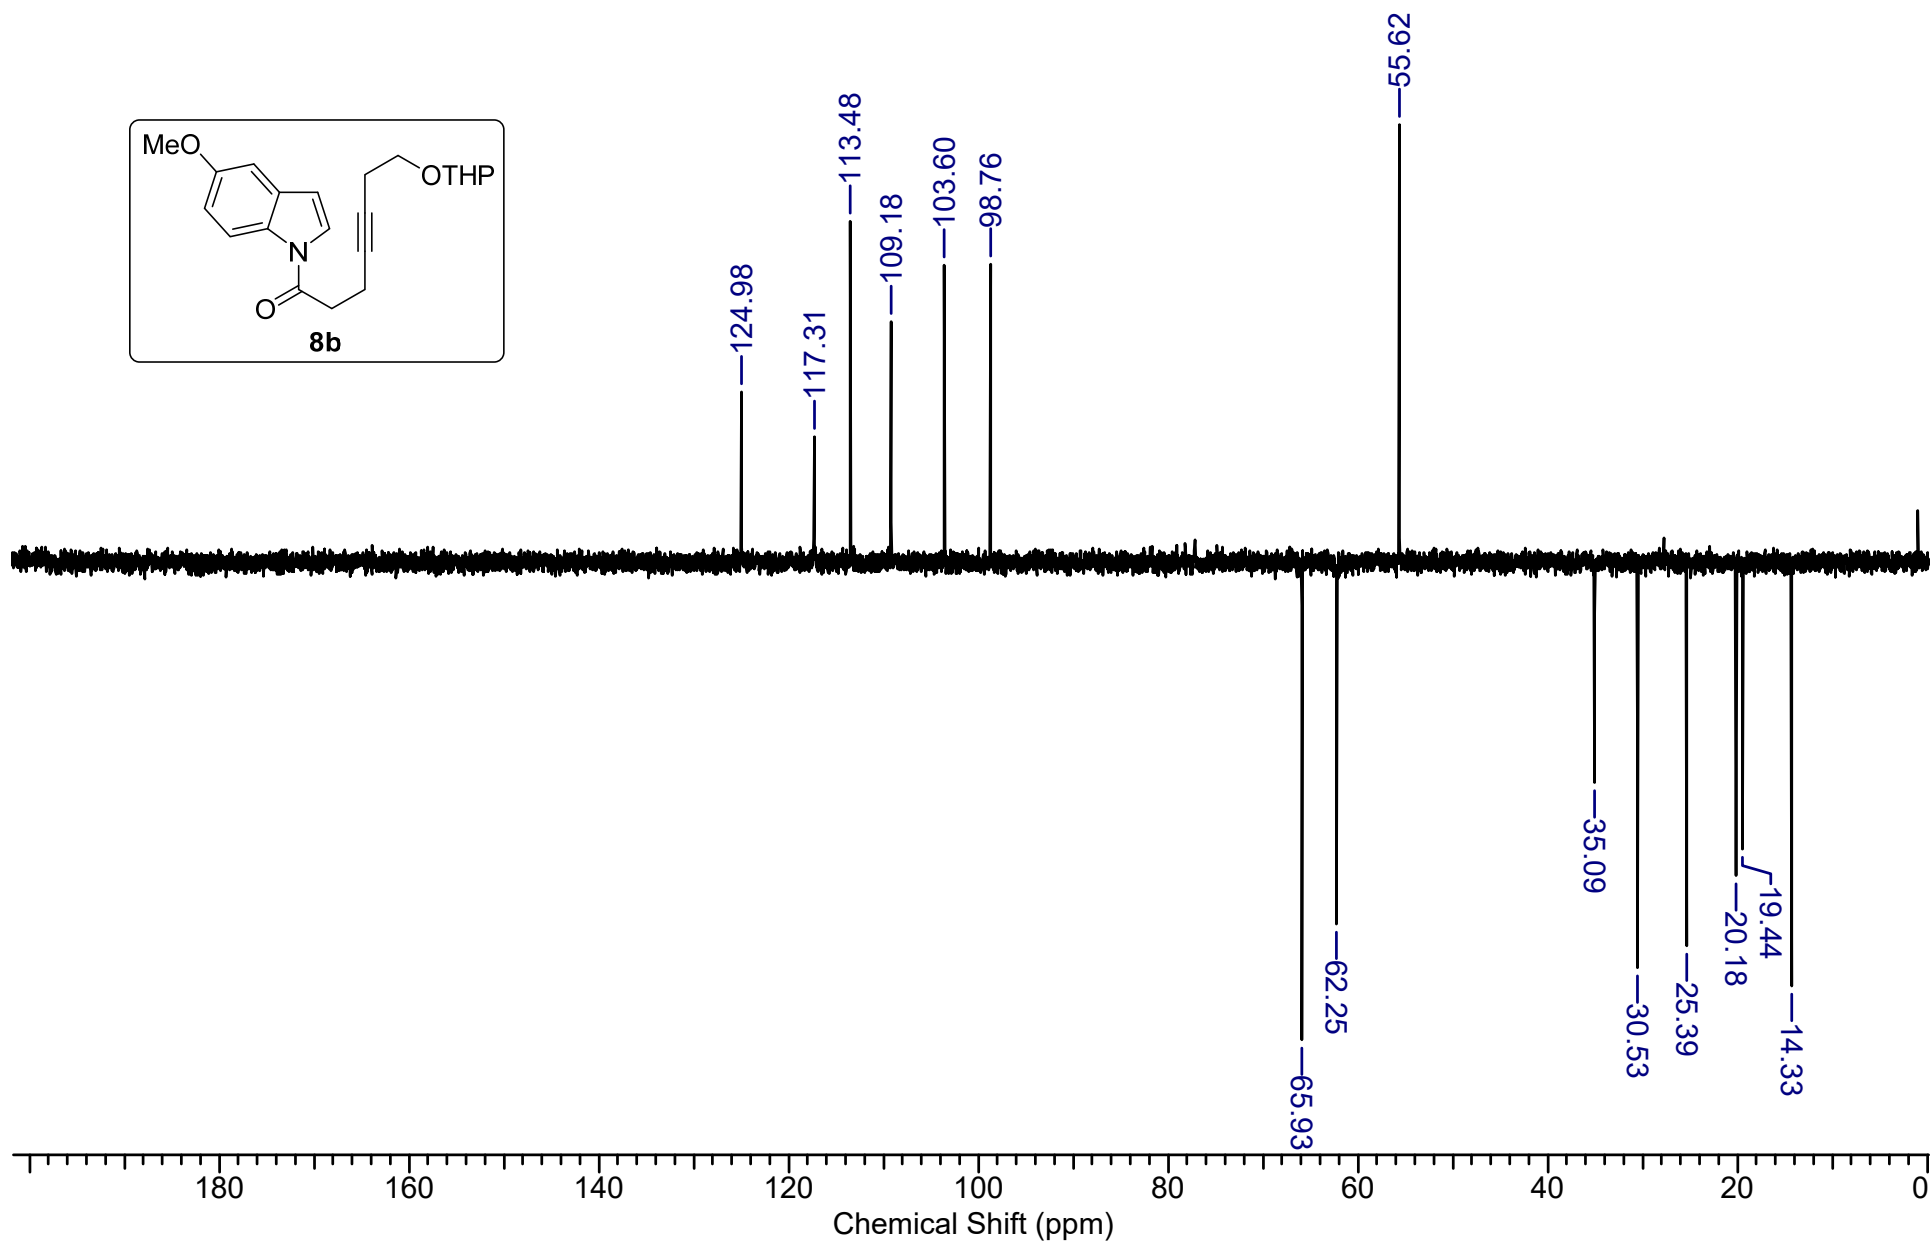

MSH-3 #298 RT: 1.62 AV: 1 NL: 4.35E8  
T: FTMS + p ESI Full ms [100.0000-1500.0000]

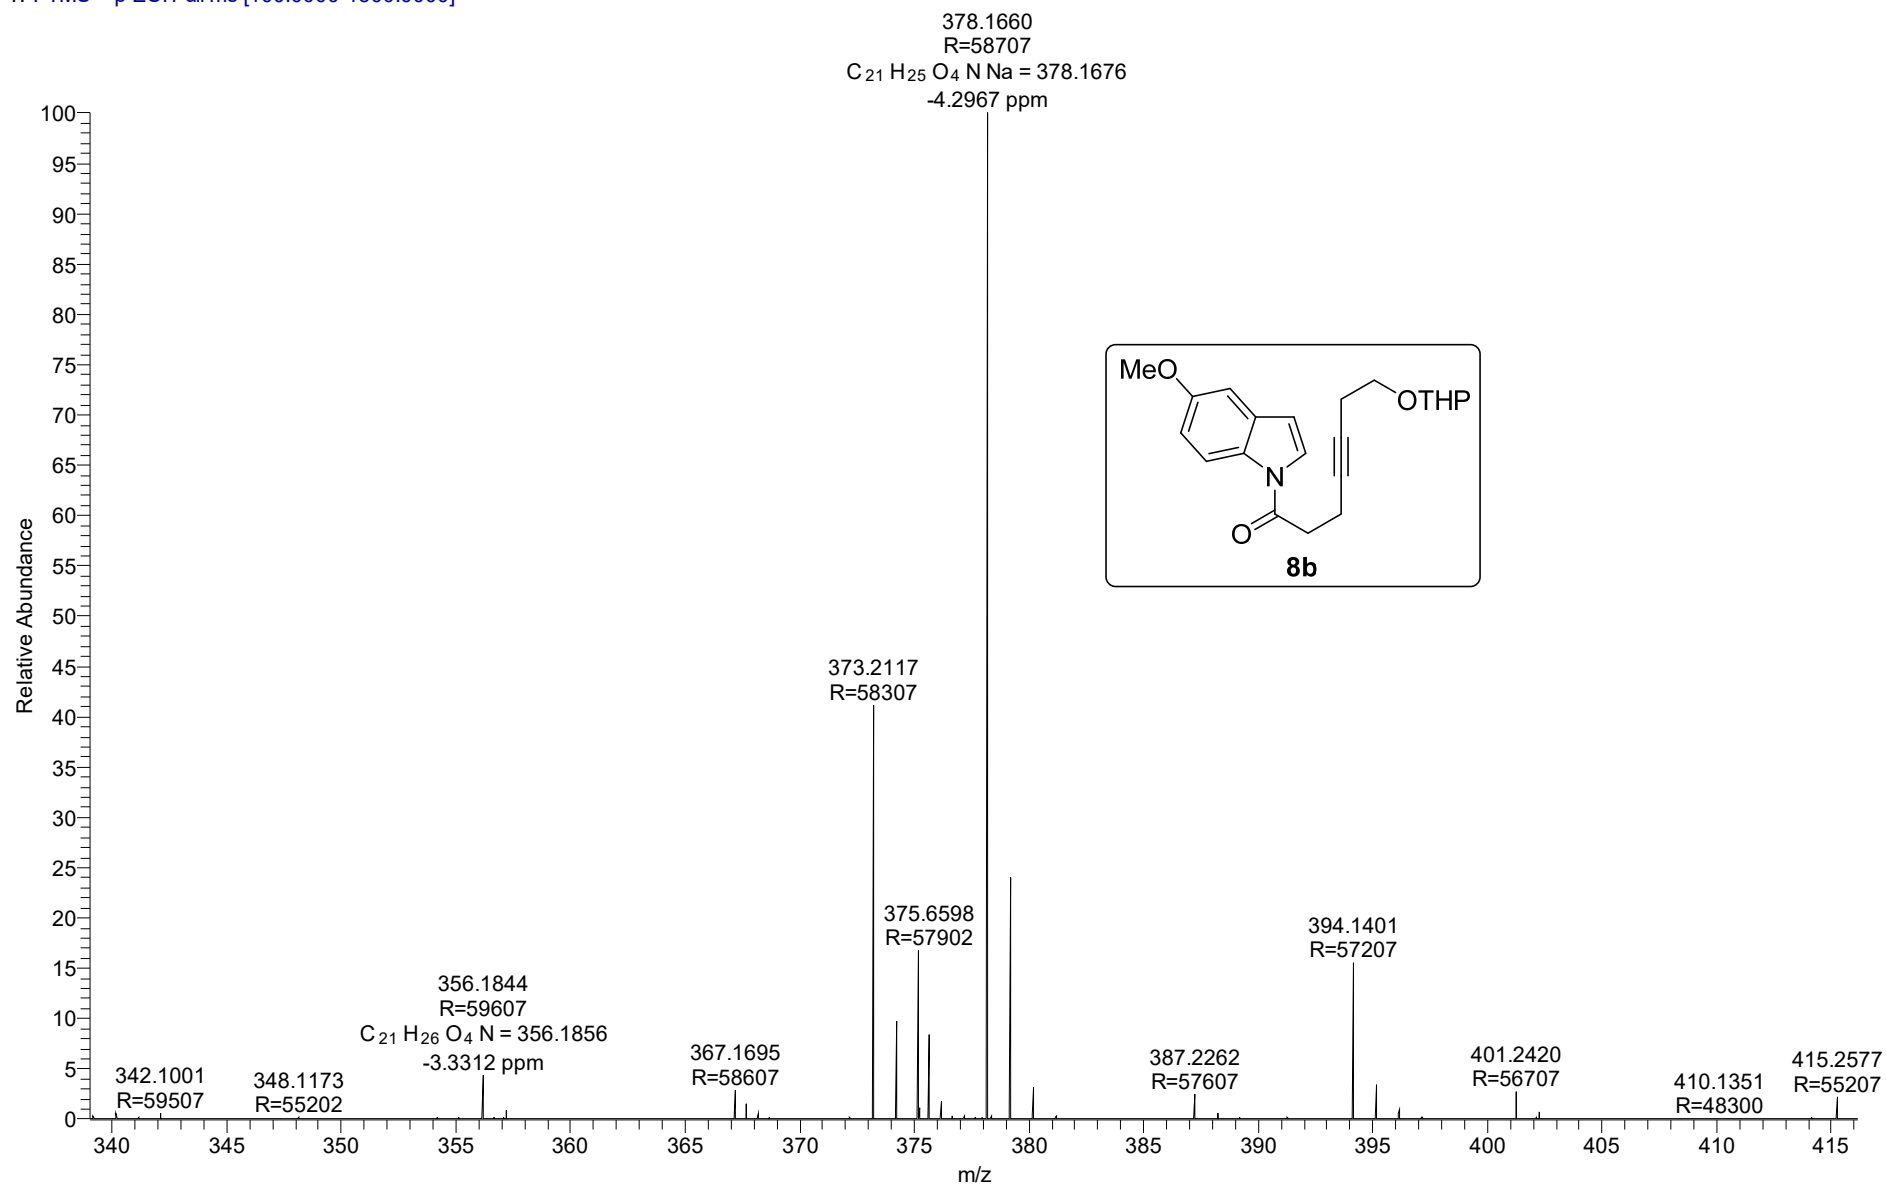

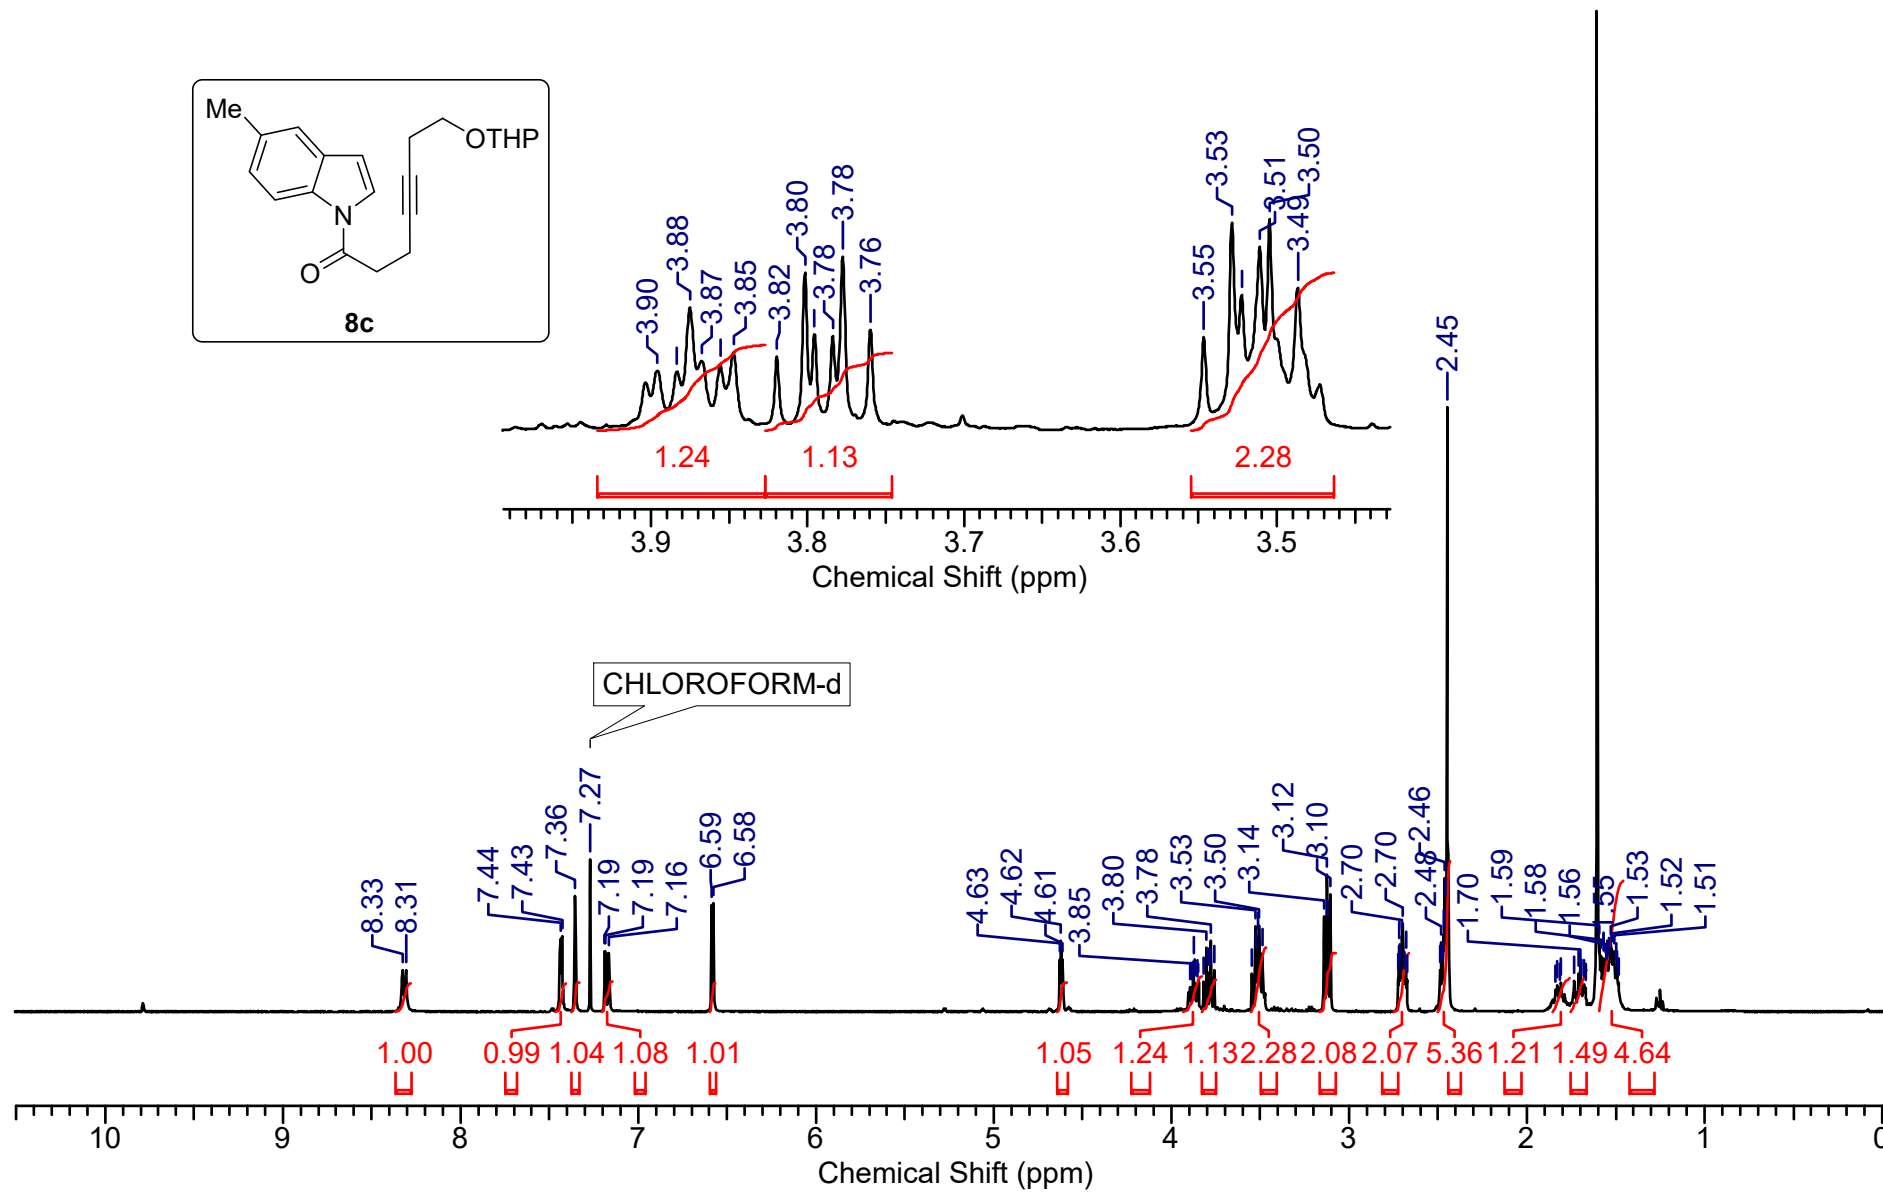

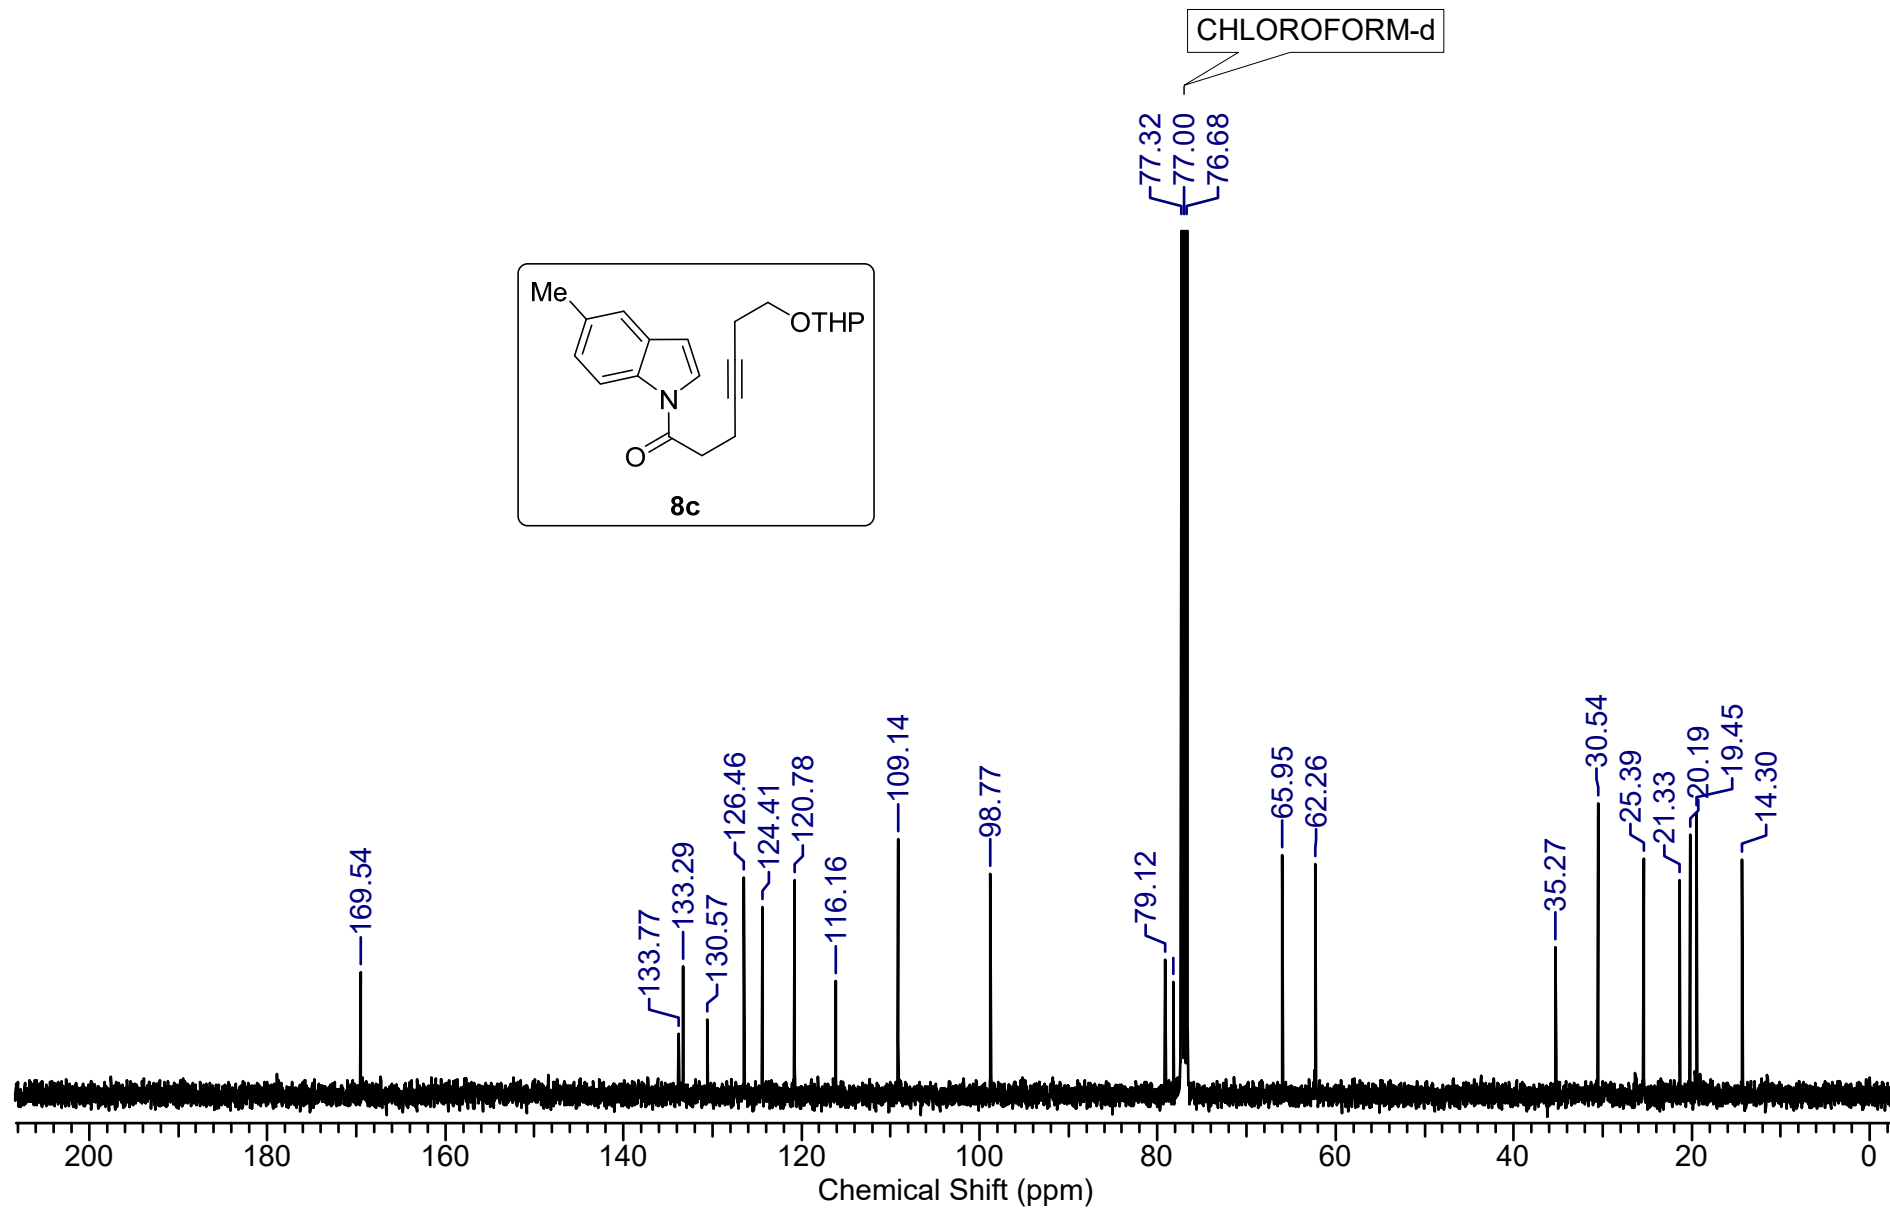

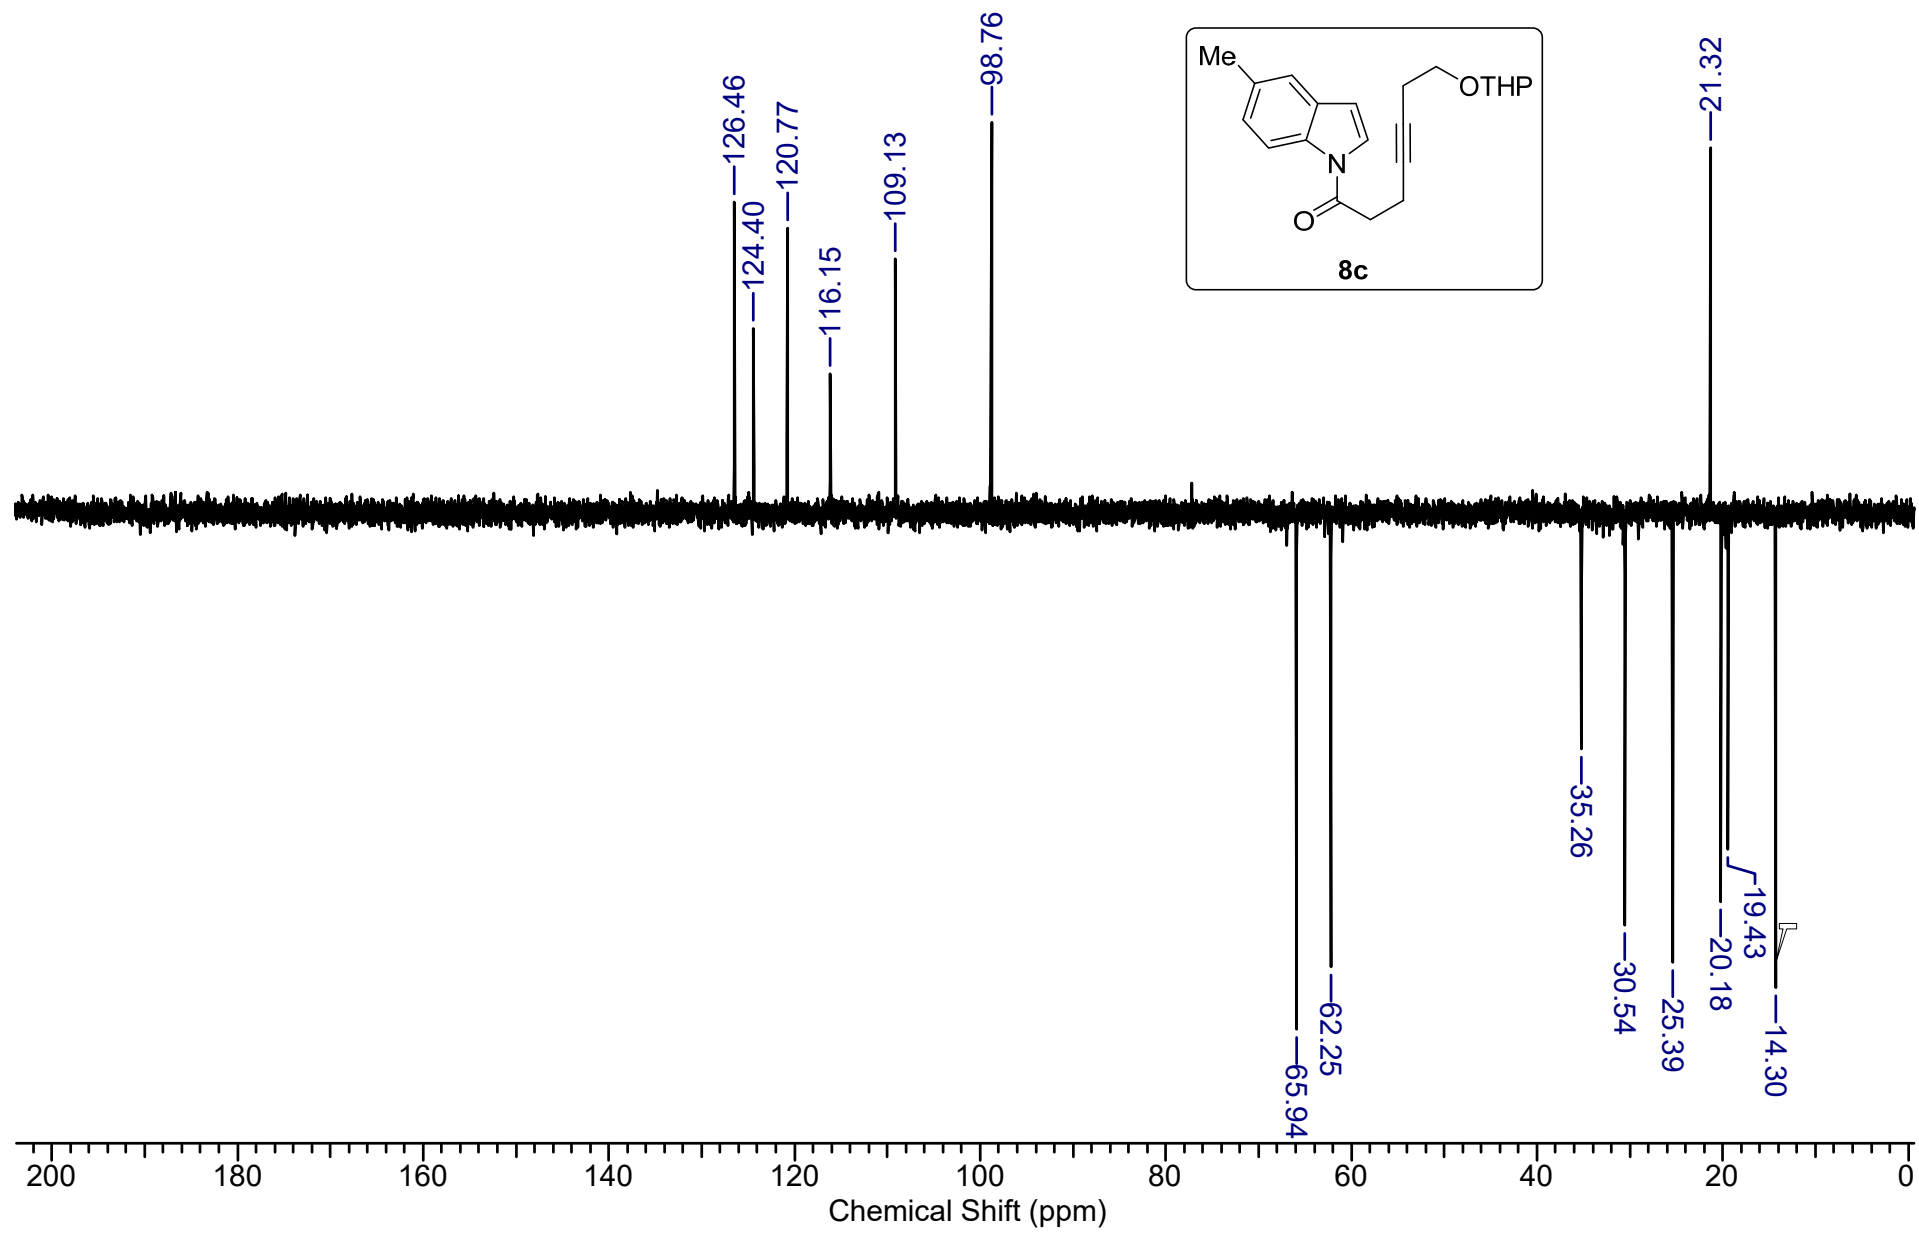

MSH-2 #322 RT: 1.74 AV: 1 NL: 1.31E8  
T: FTMS + p ESI Full ms [100.0000-1500.0000]

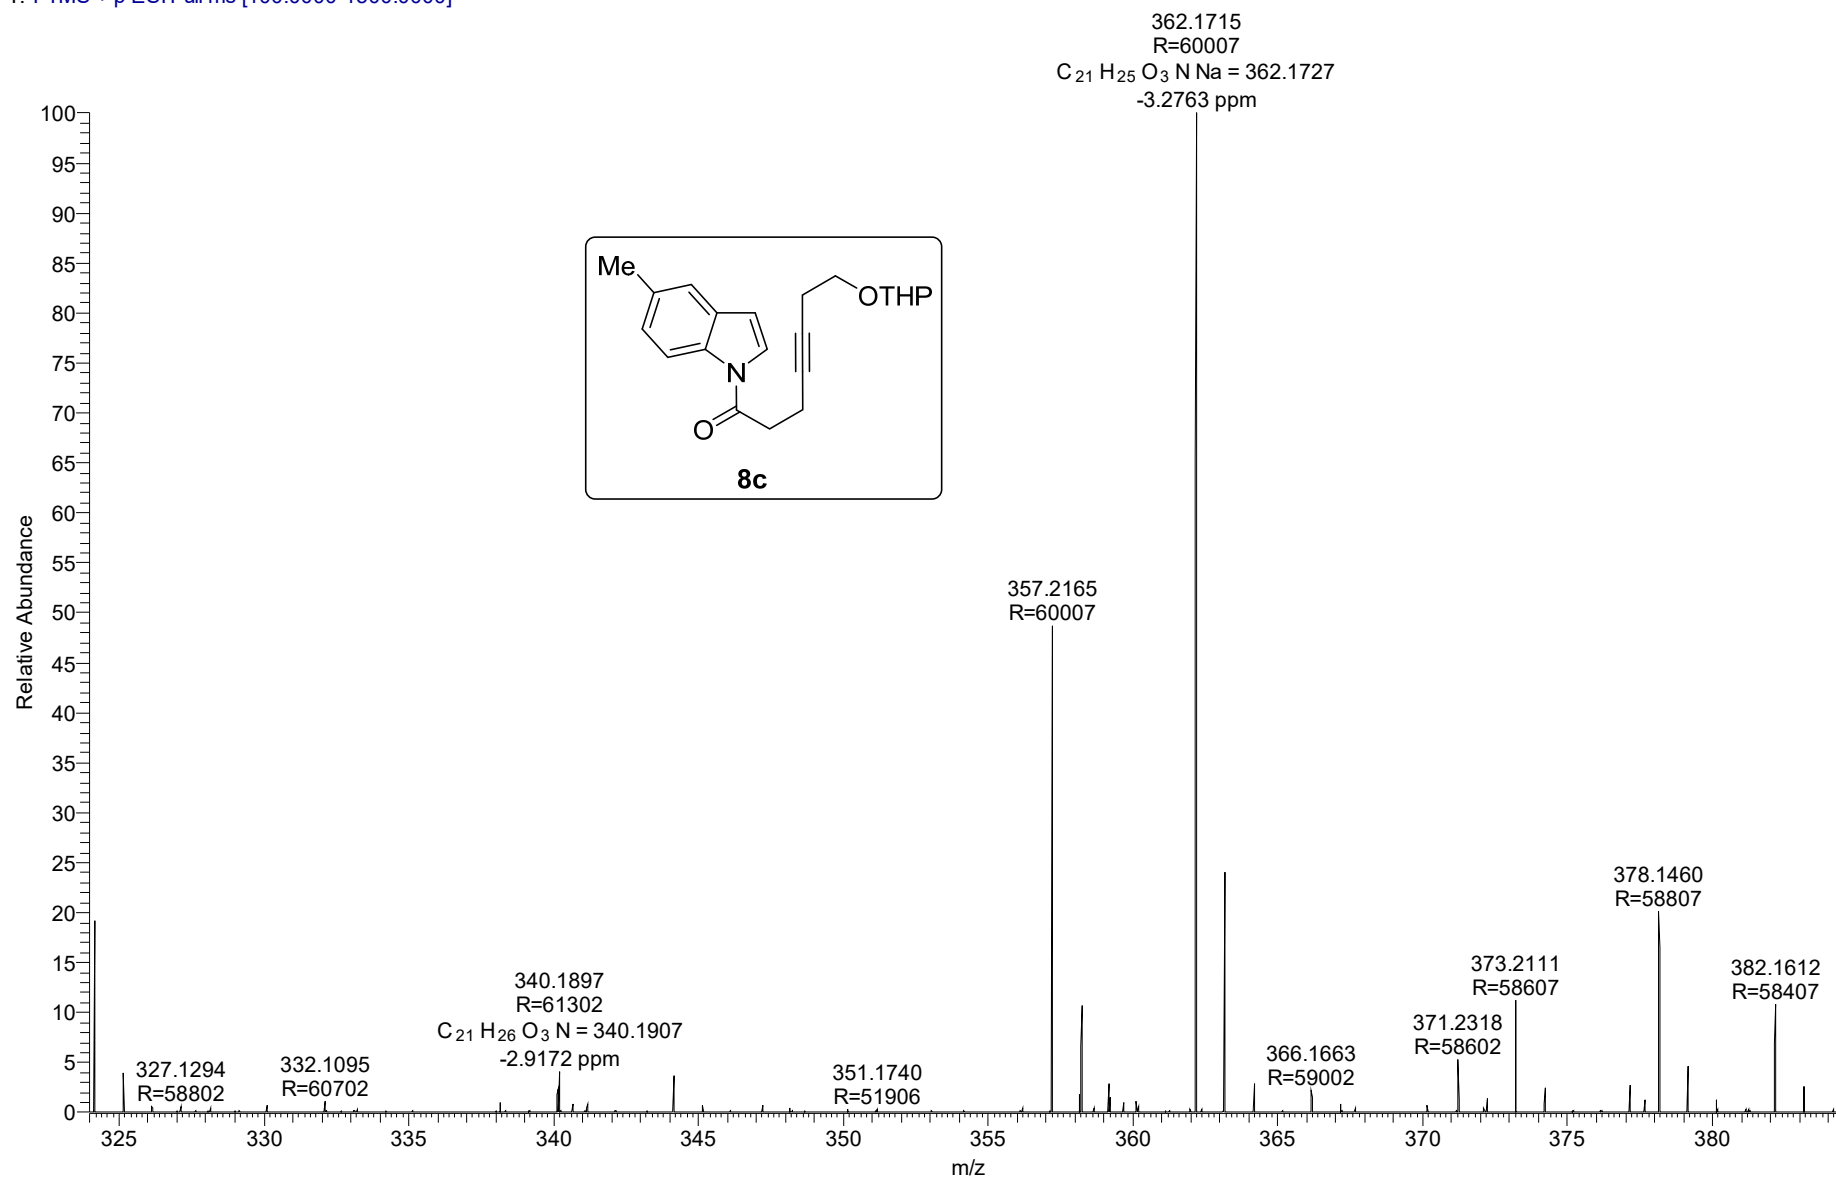

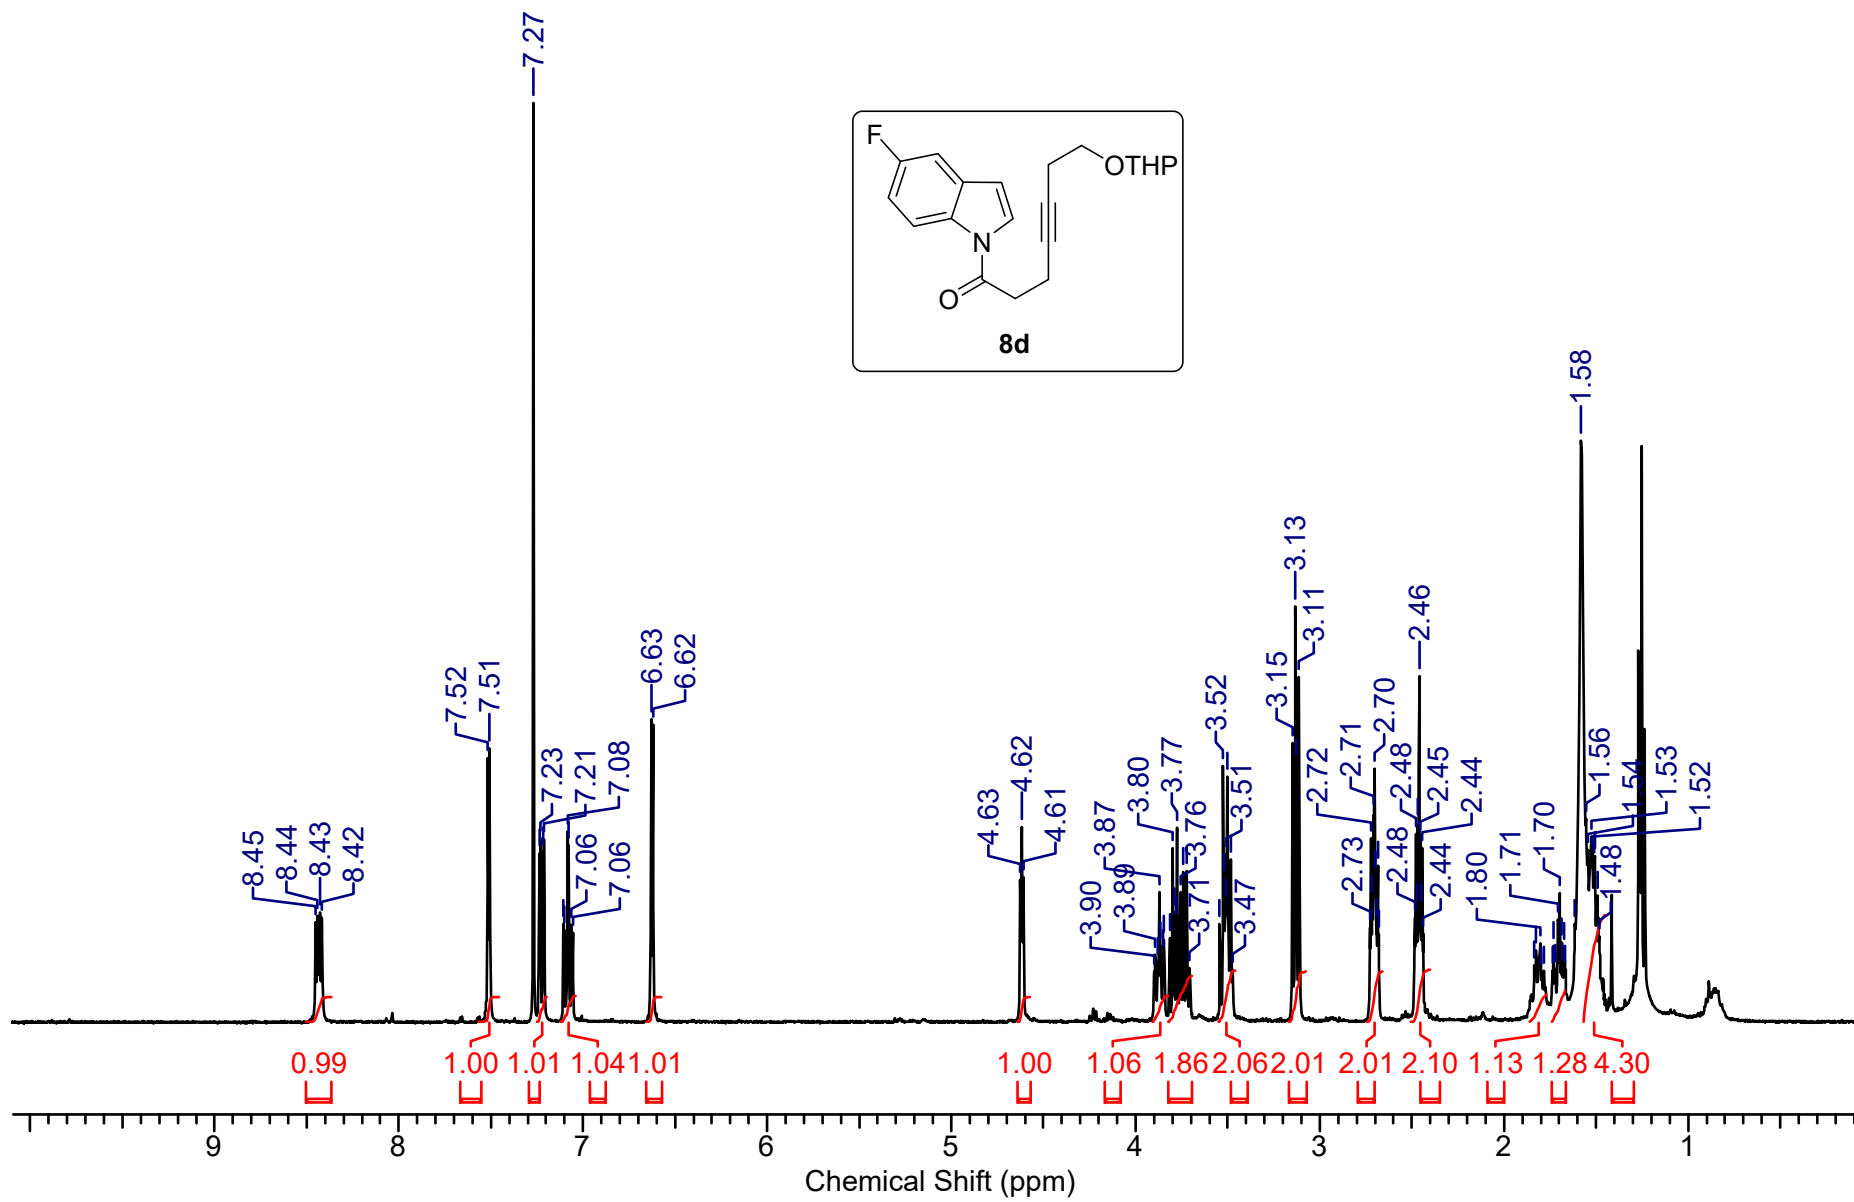



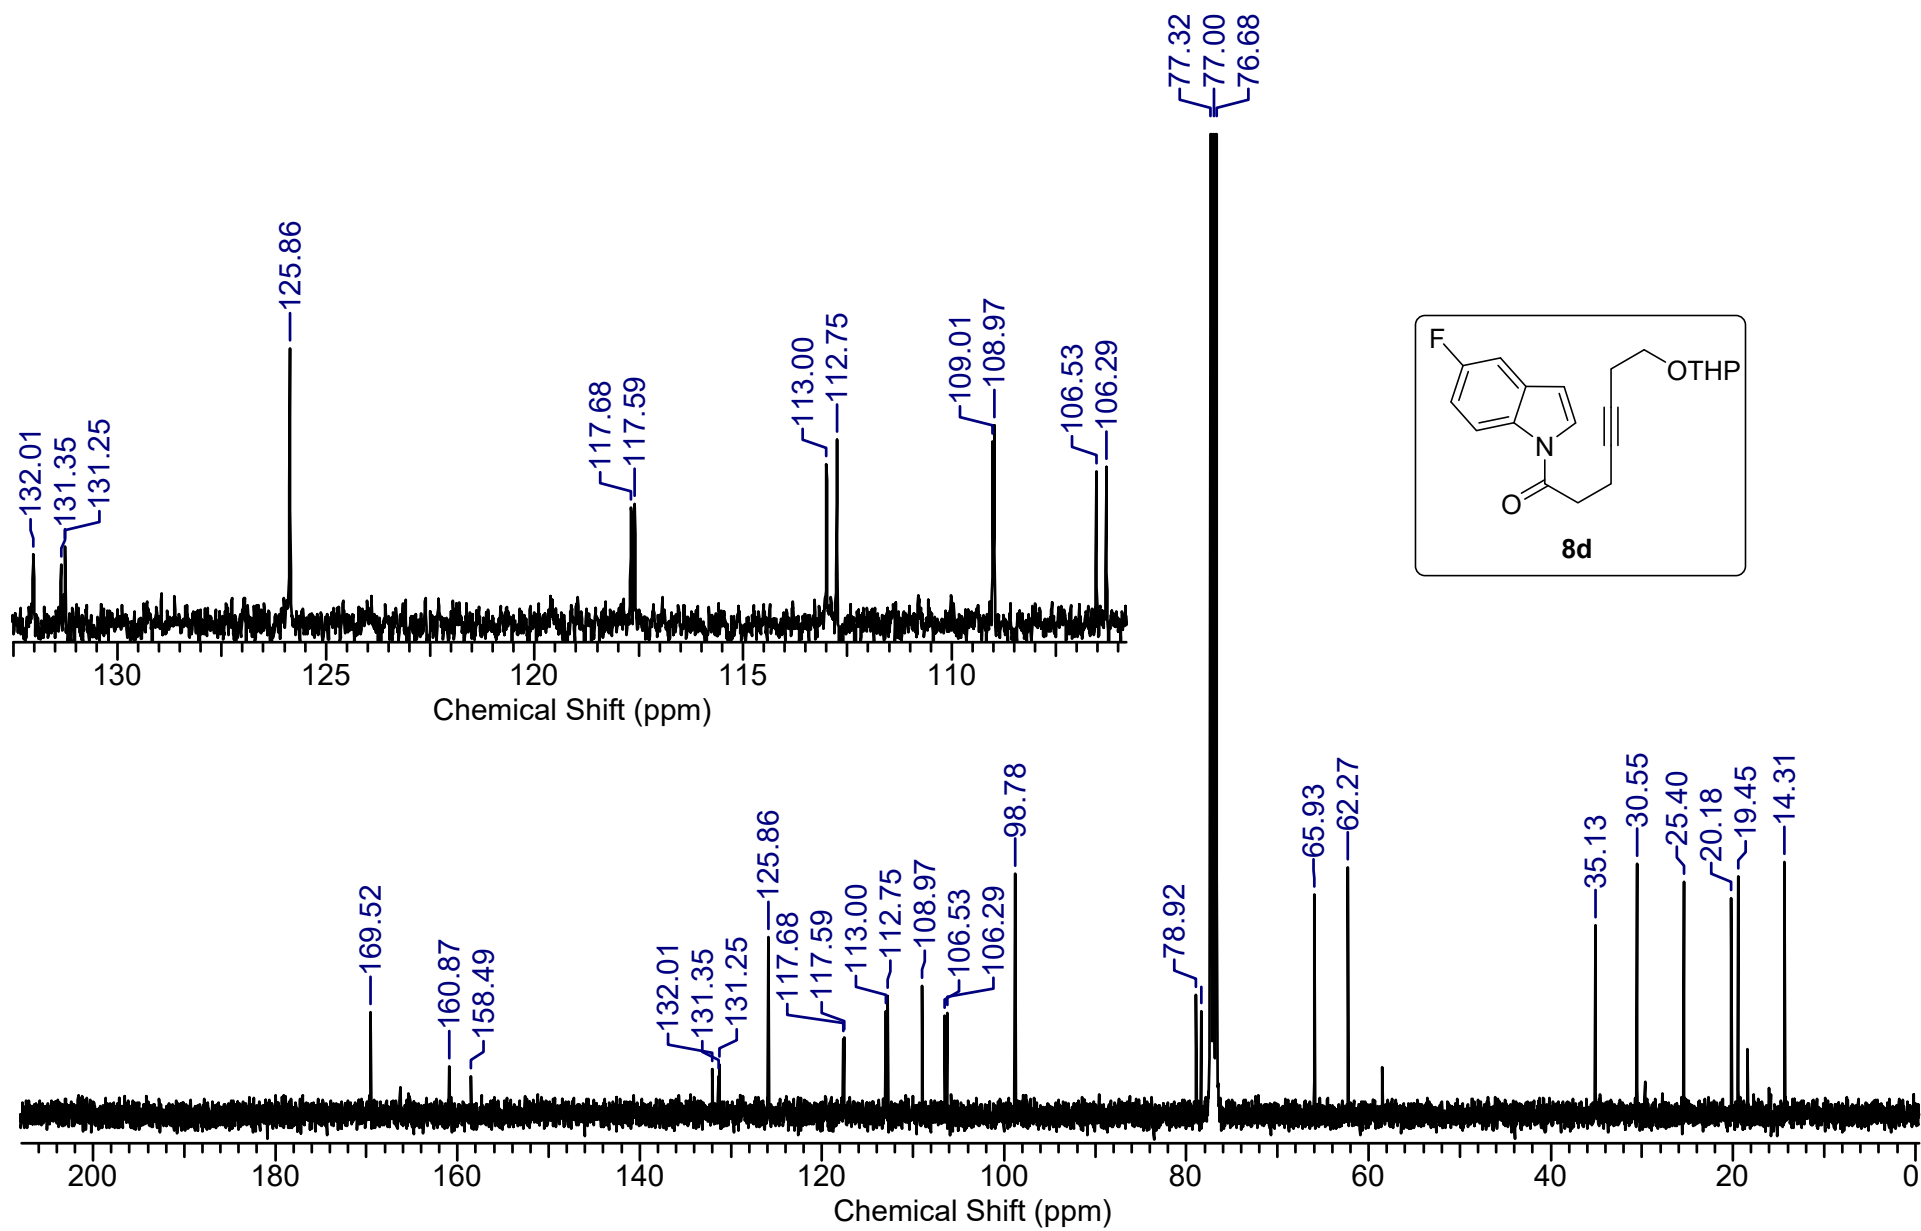

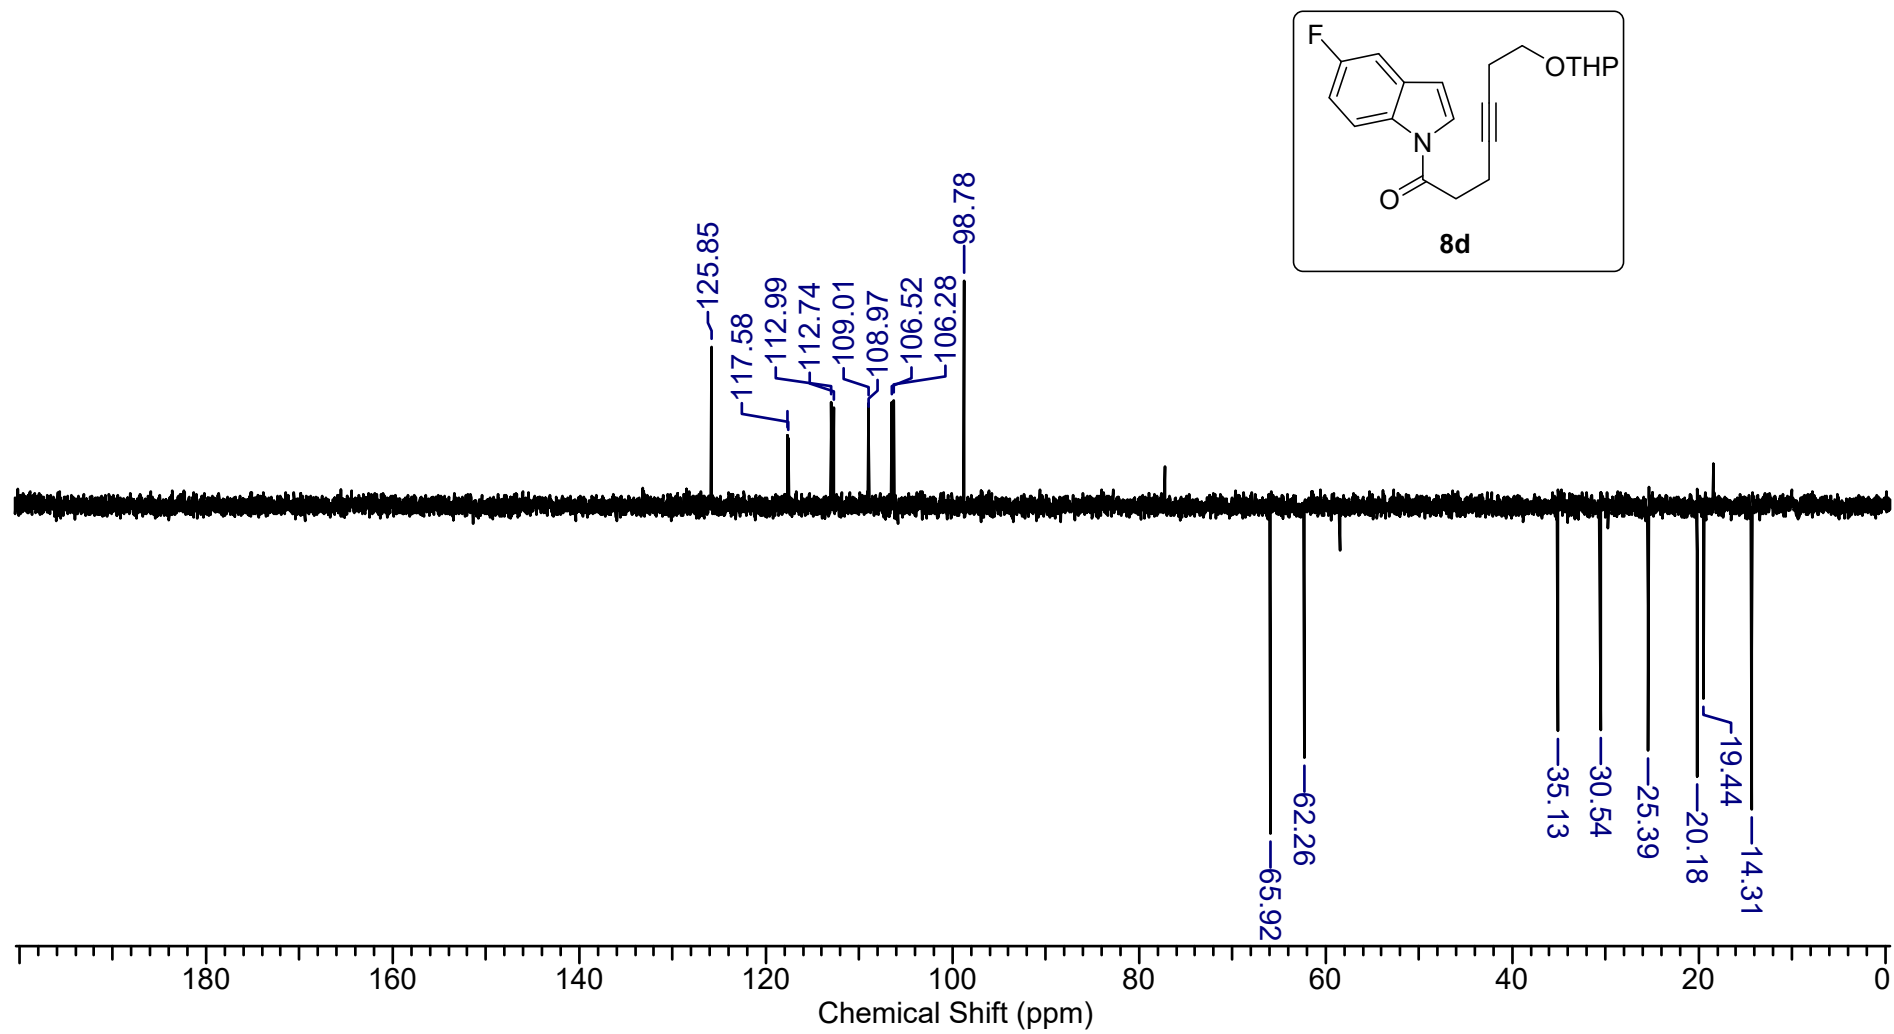

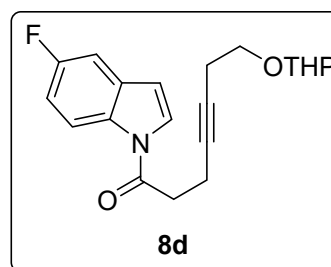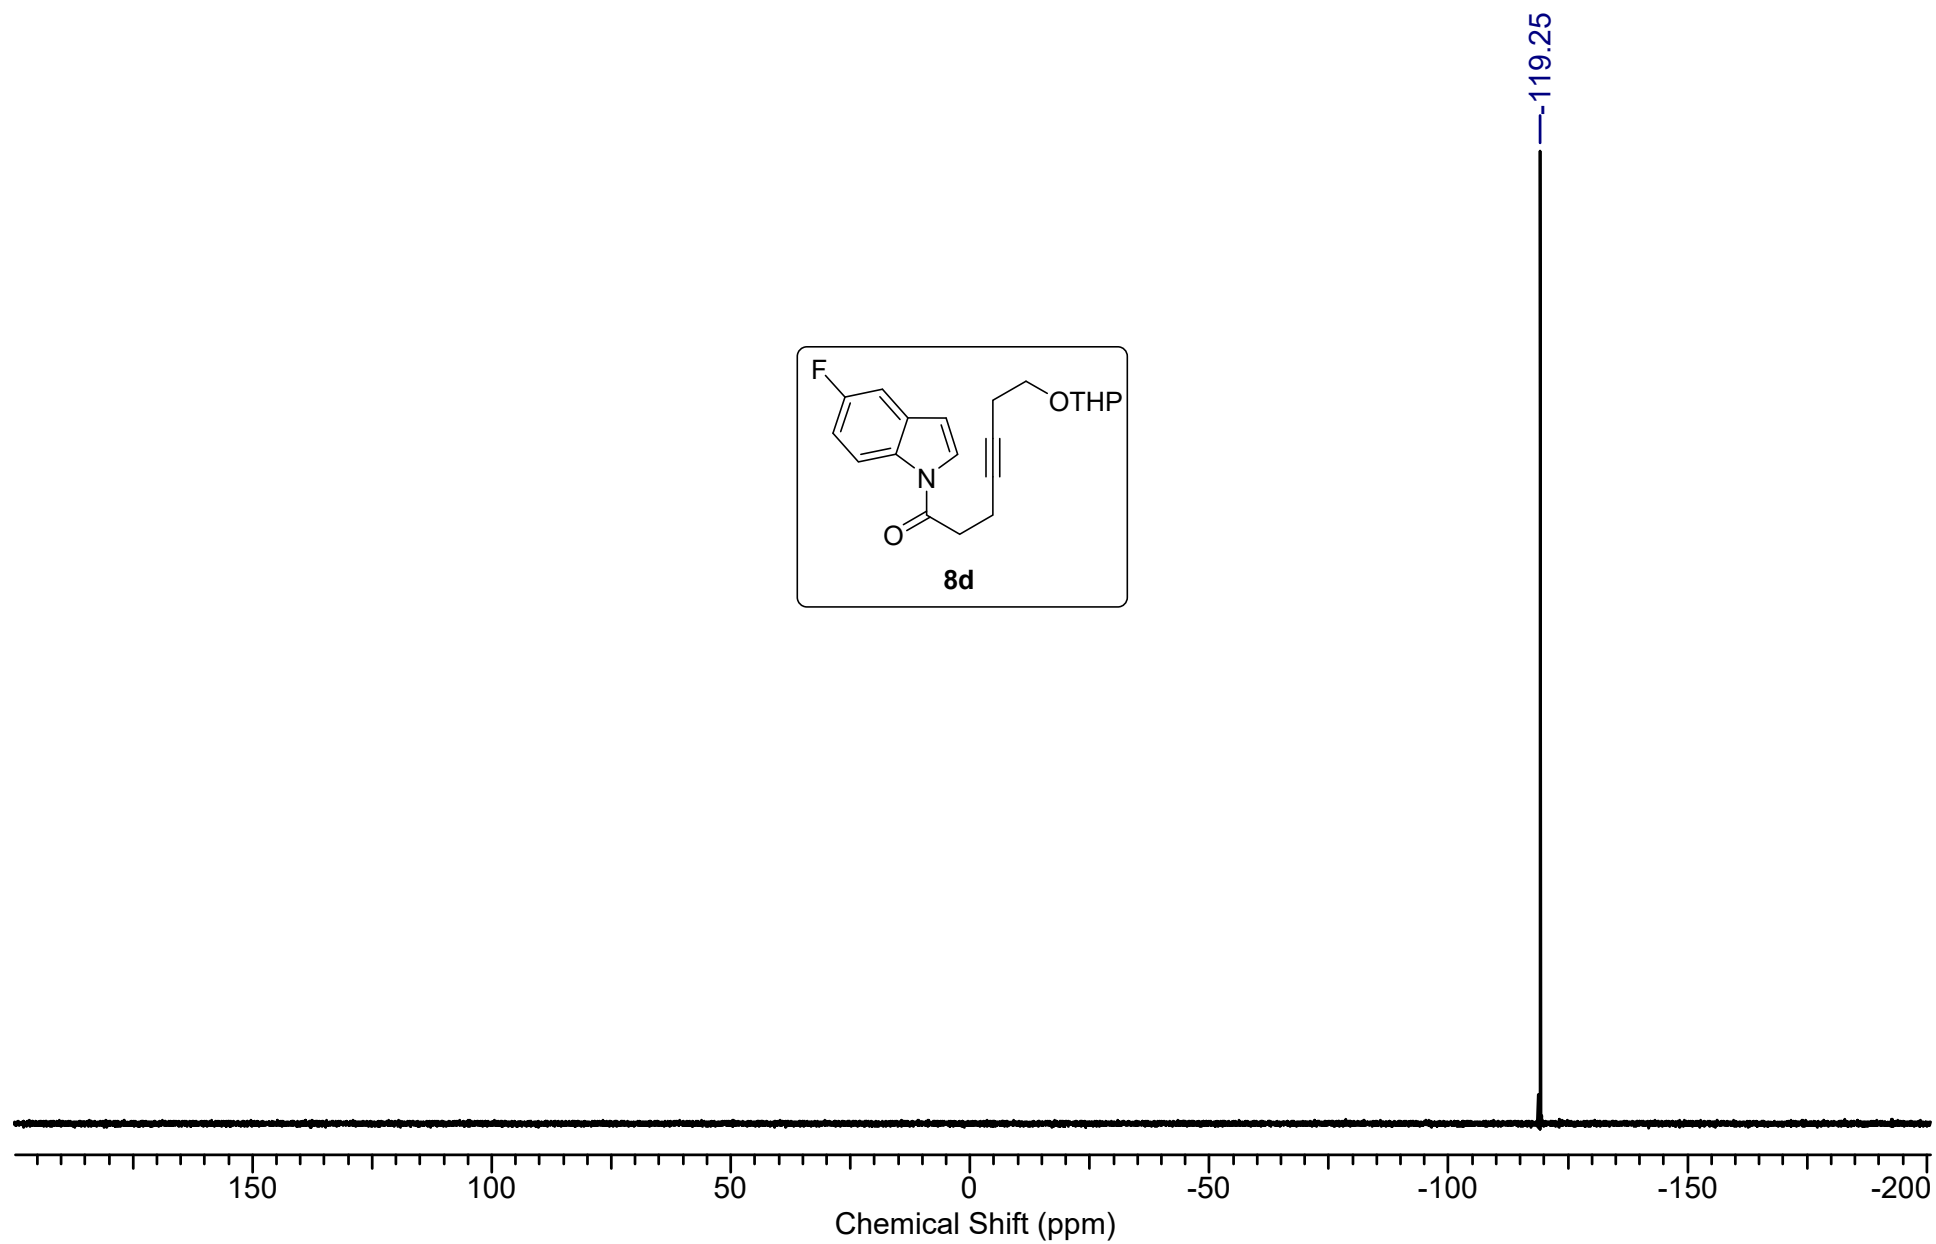

MSH-4 #305 RT: 1.66 AV: 1 NL: 3.00E8  
T: FTMS + p ESI Full ms [100.0000-1500.0000]

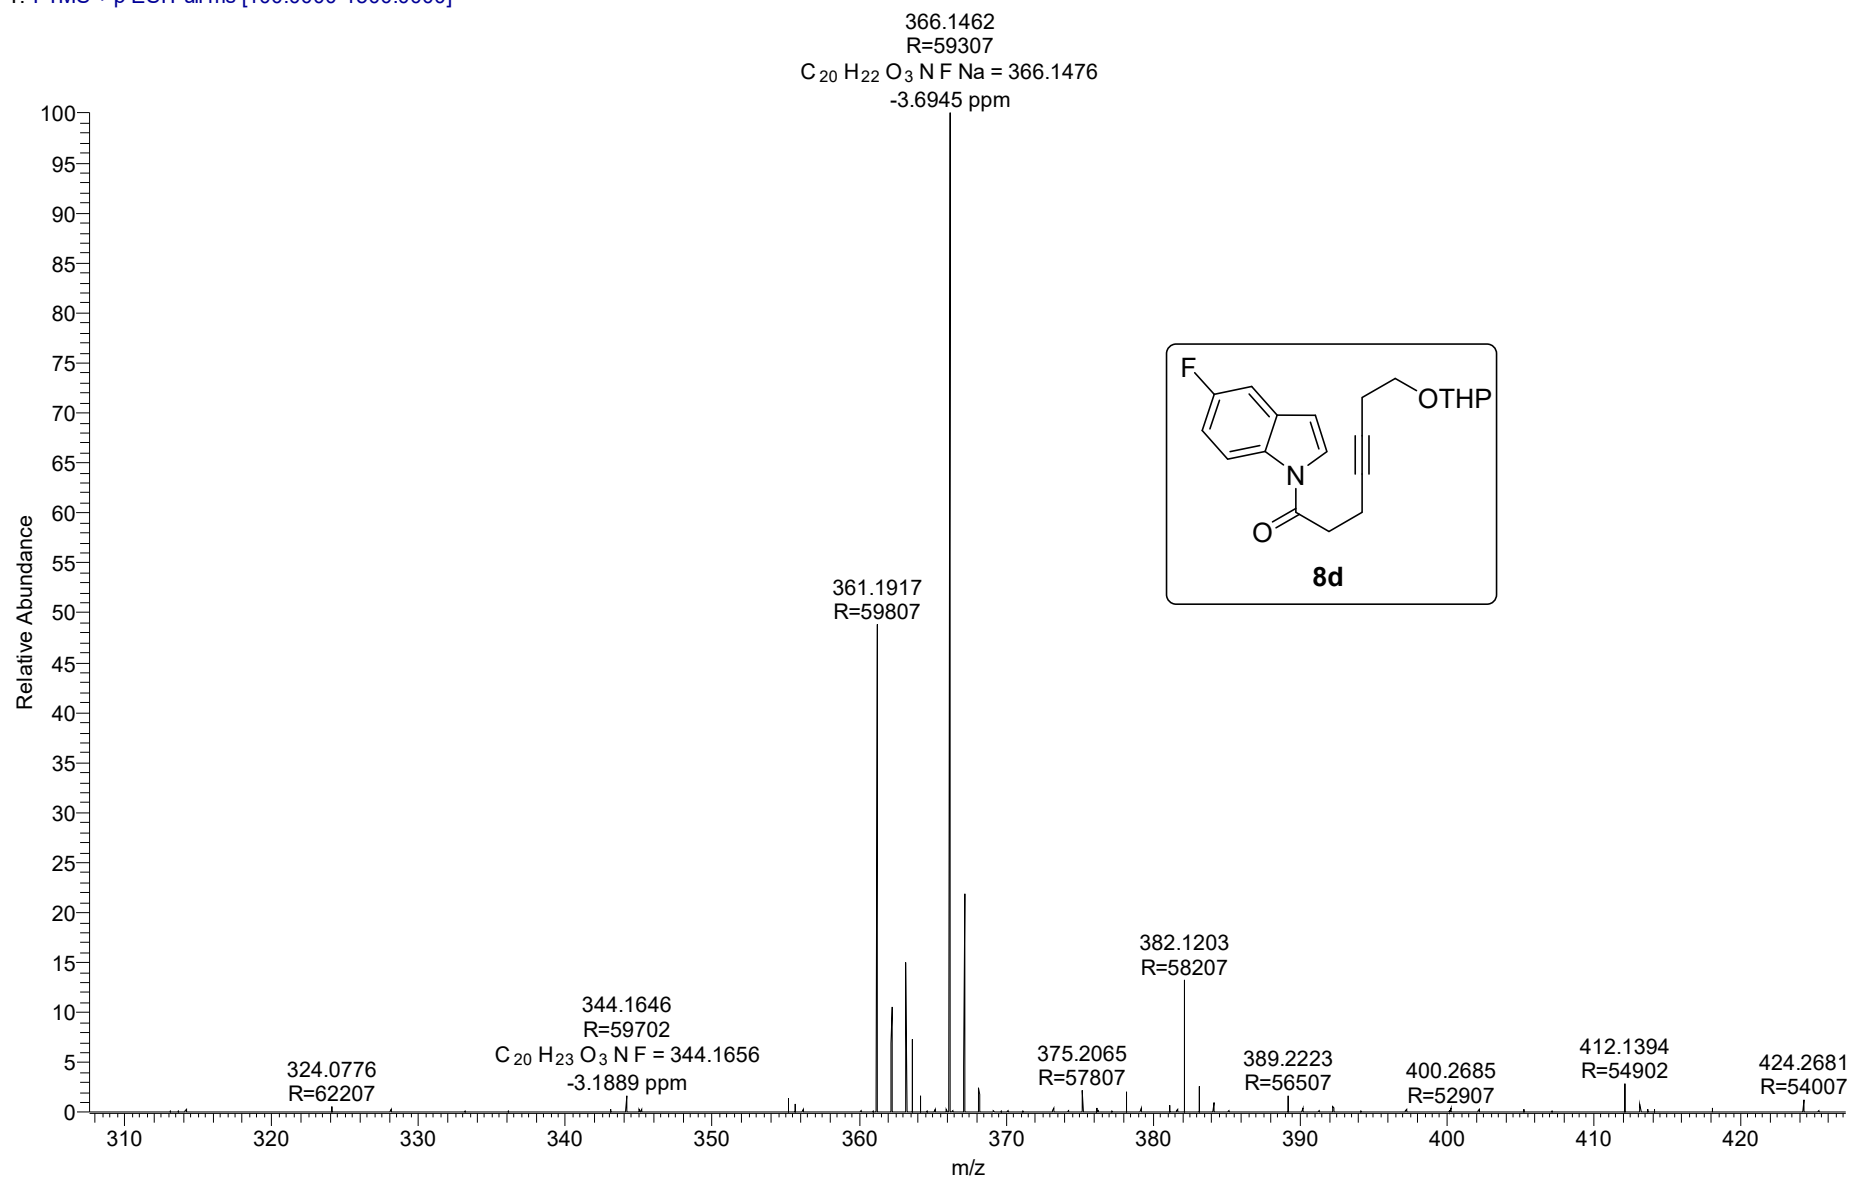

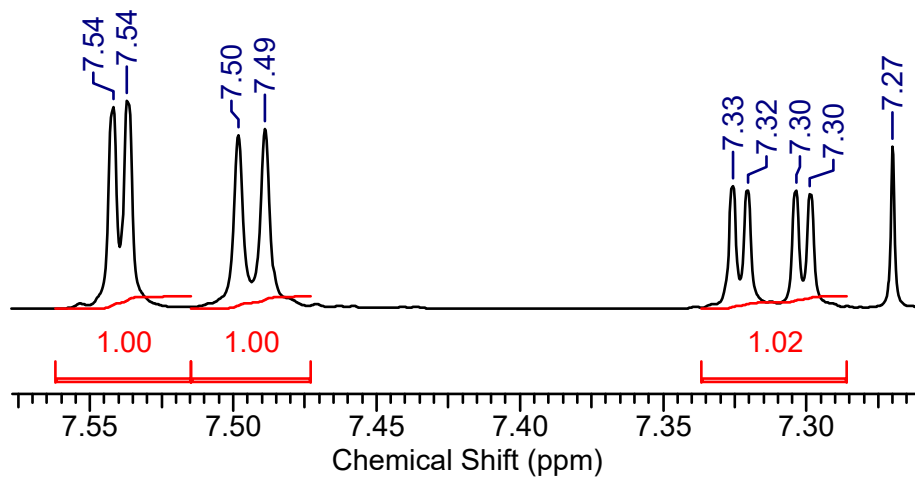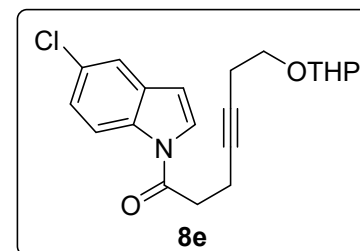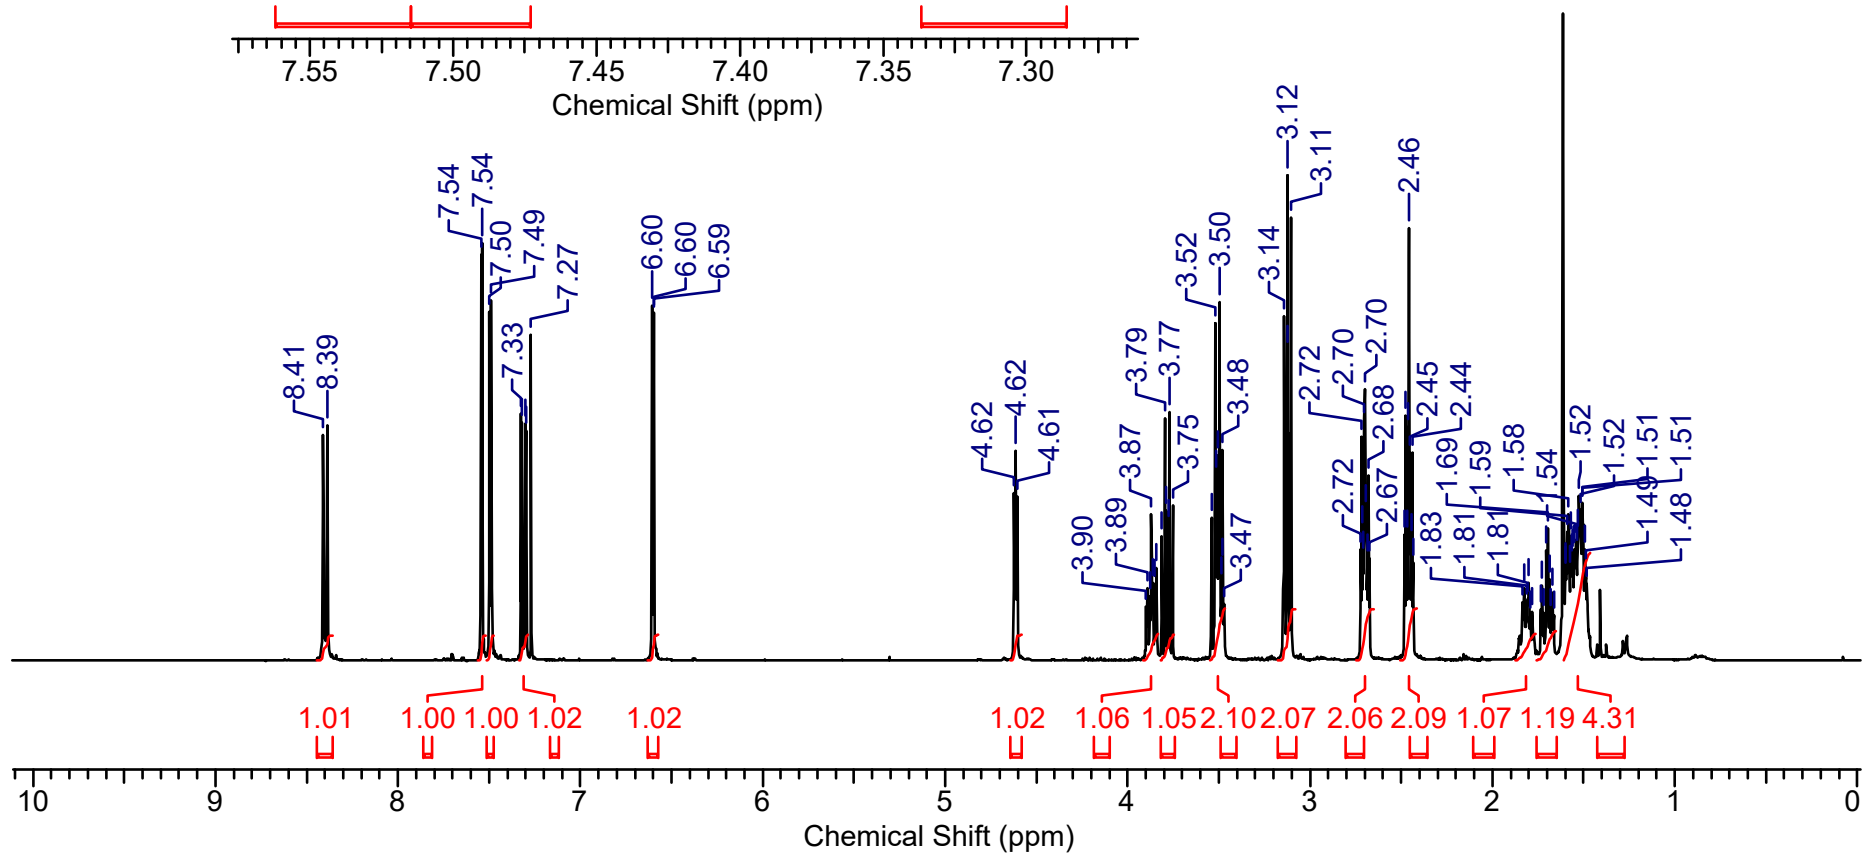

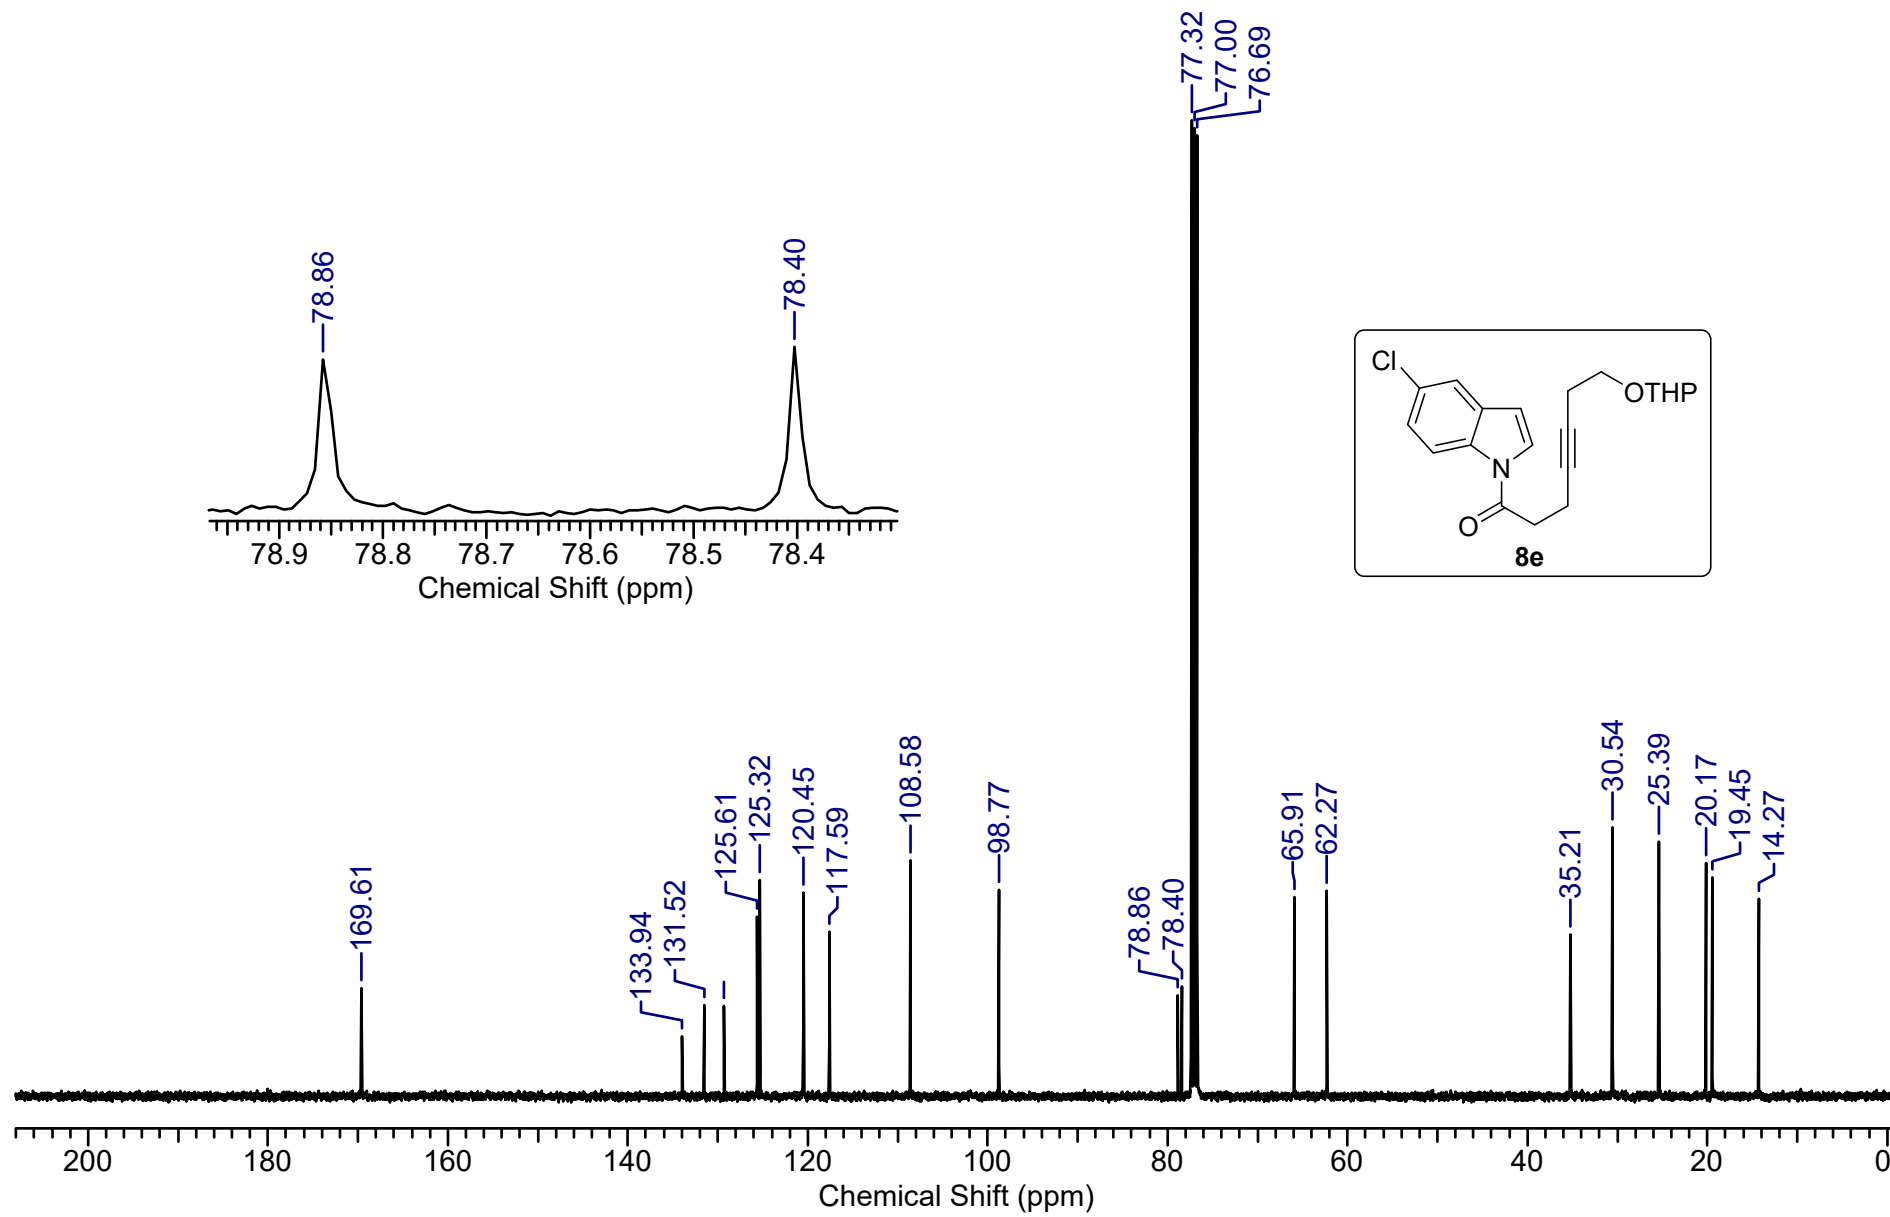

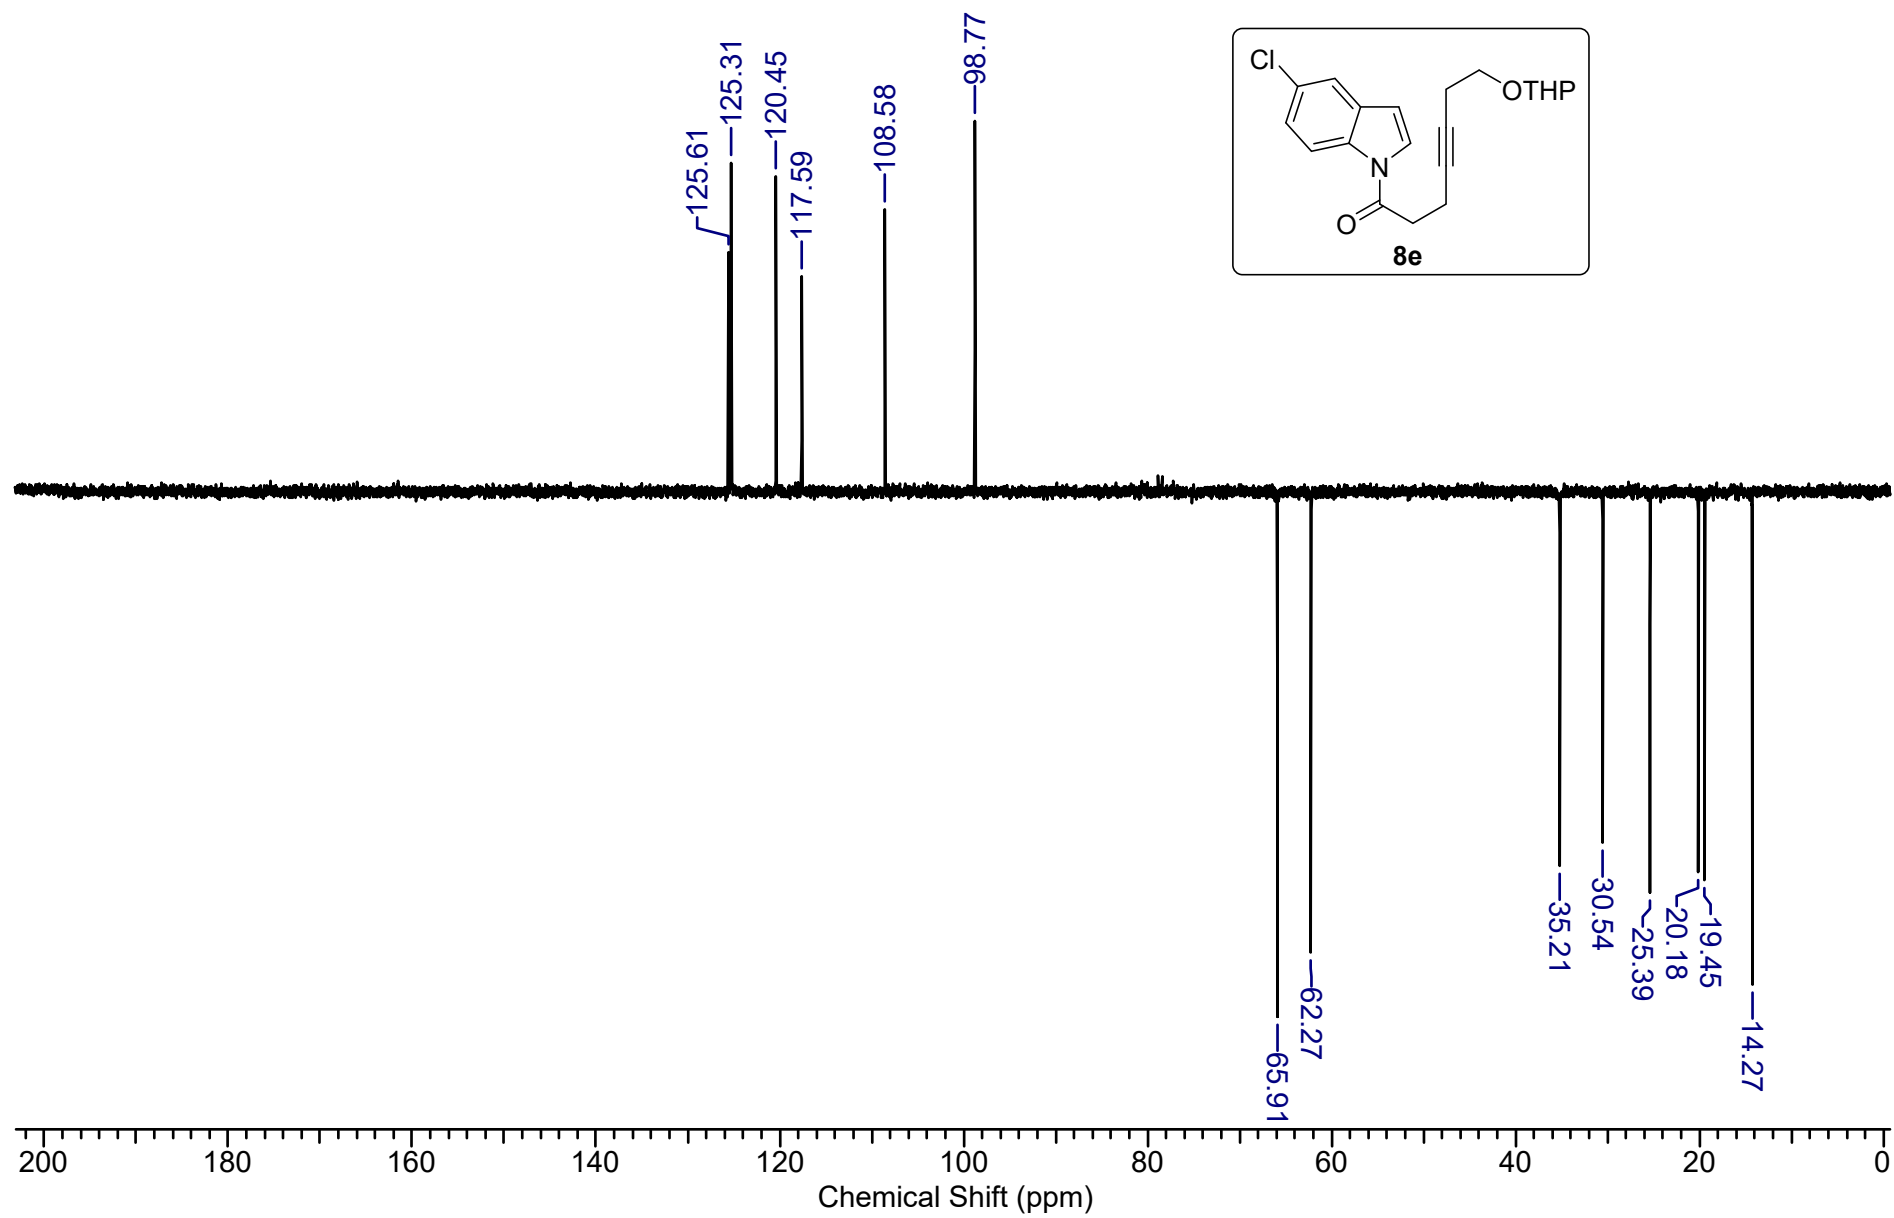

MSH-5 #342 RT: 1.86 AV: 1 NL: 1.42E8  
T: FTMS + p ESI Full ms [100.0000-1500.0000]

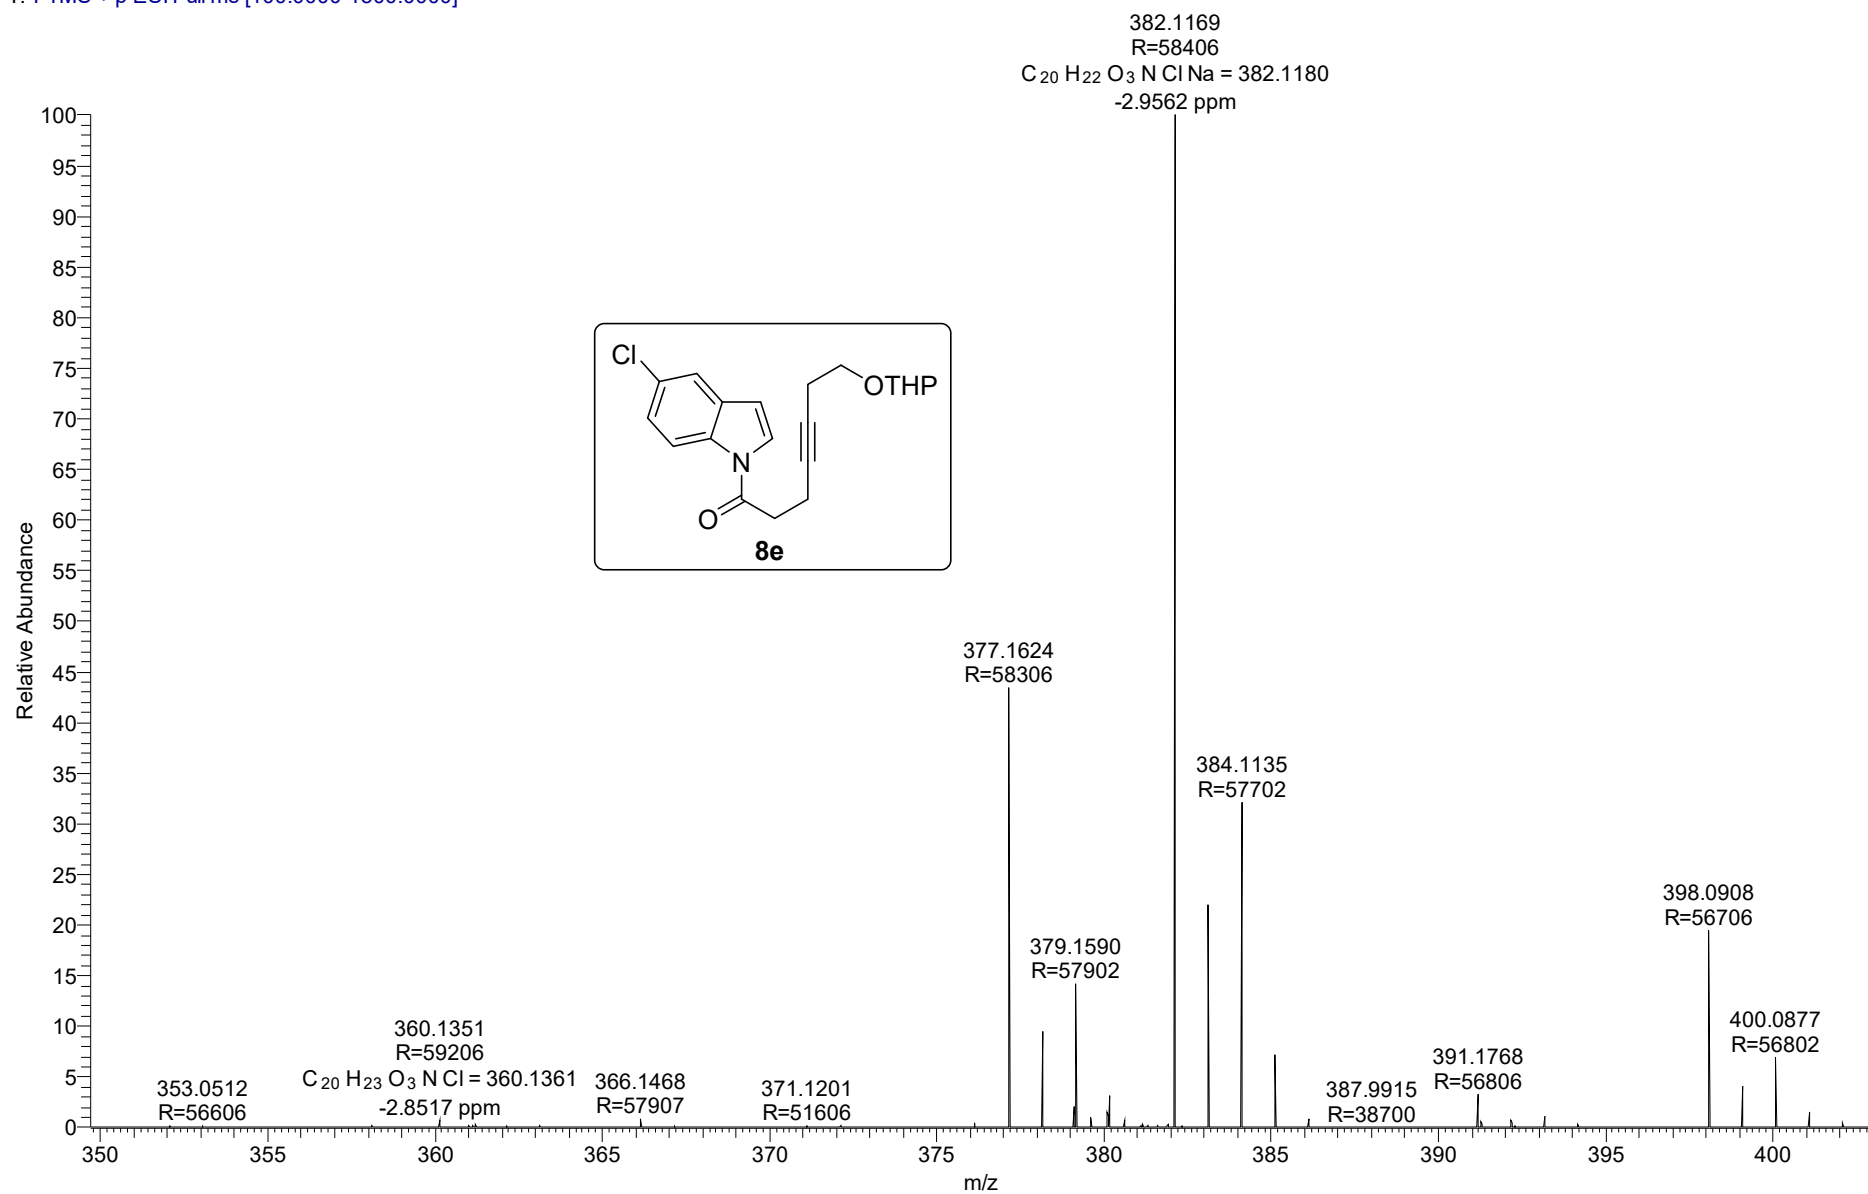



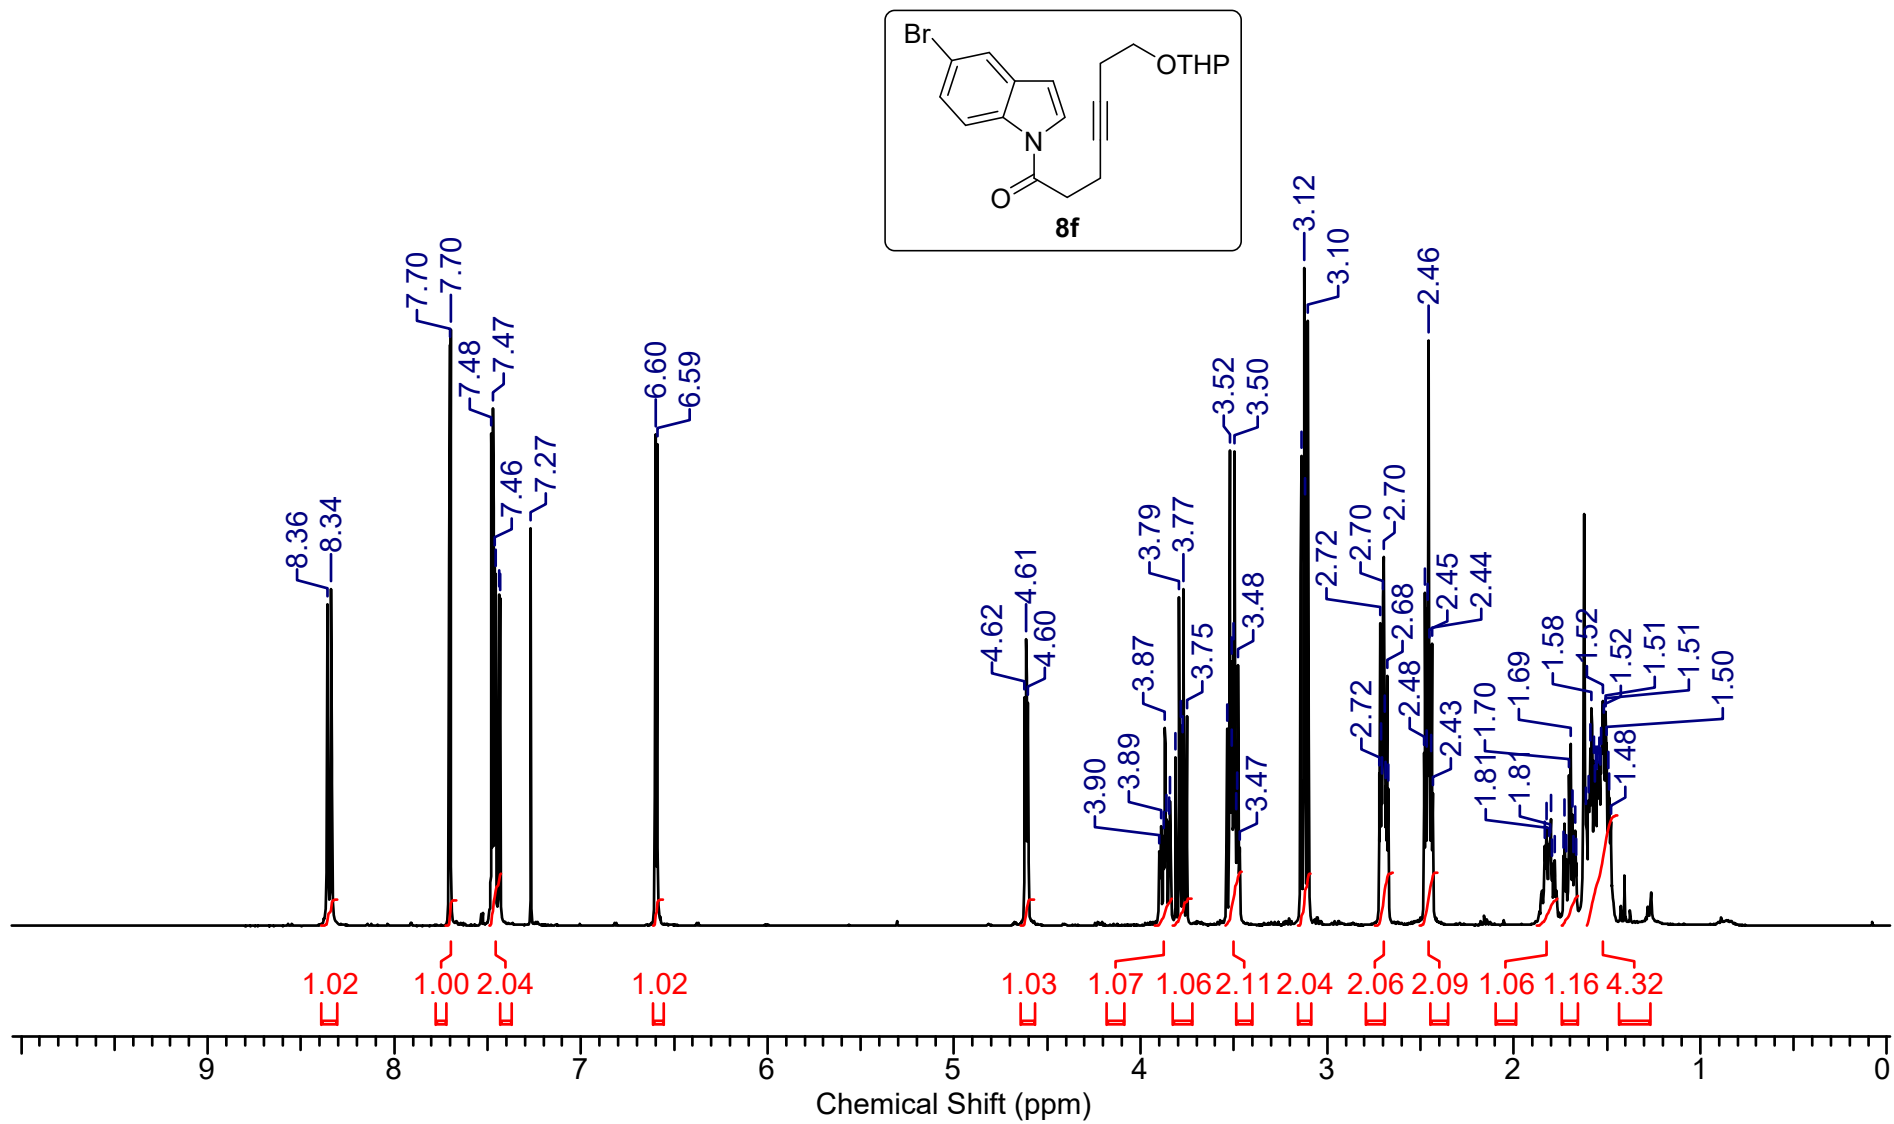

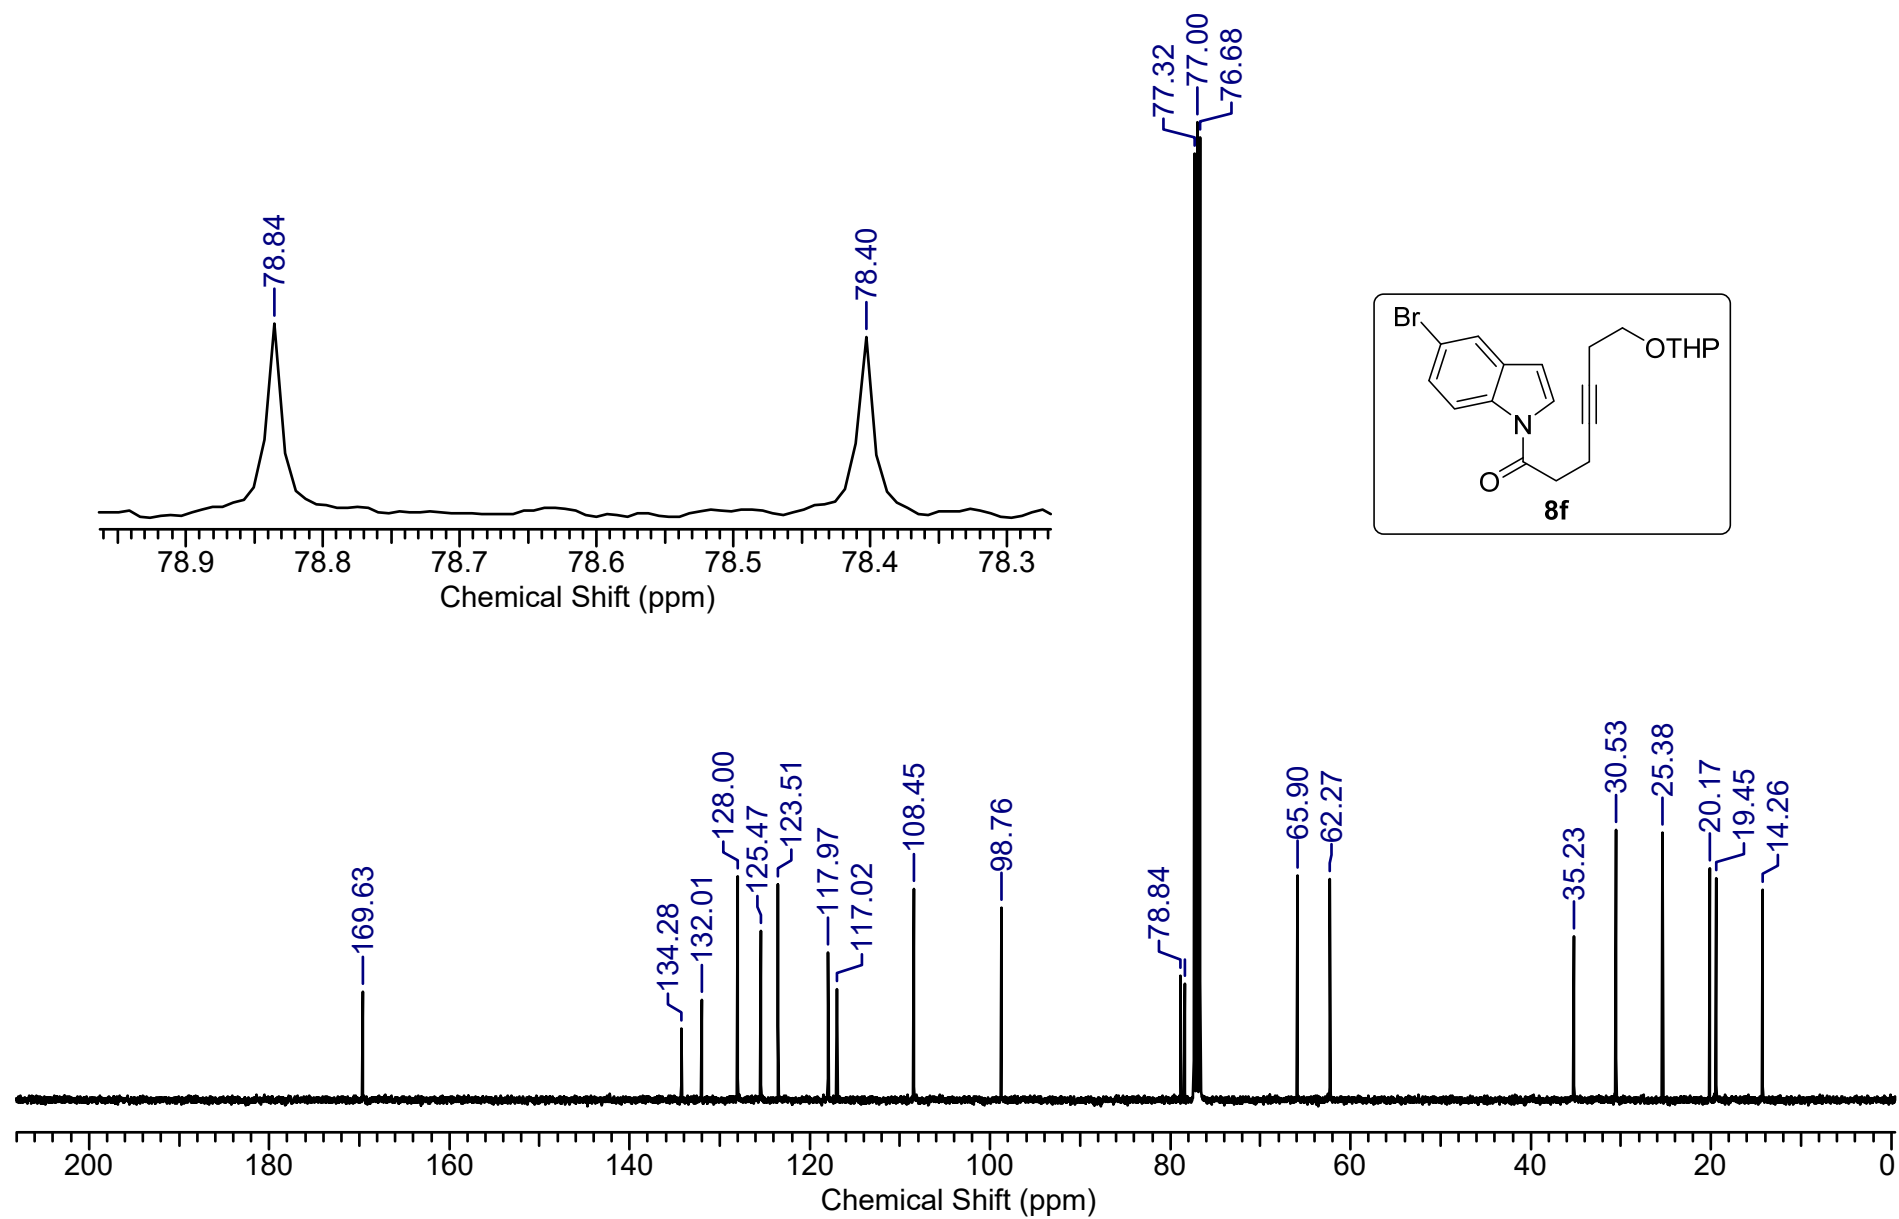

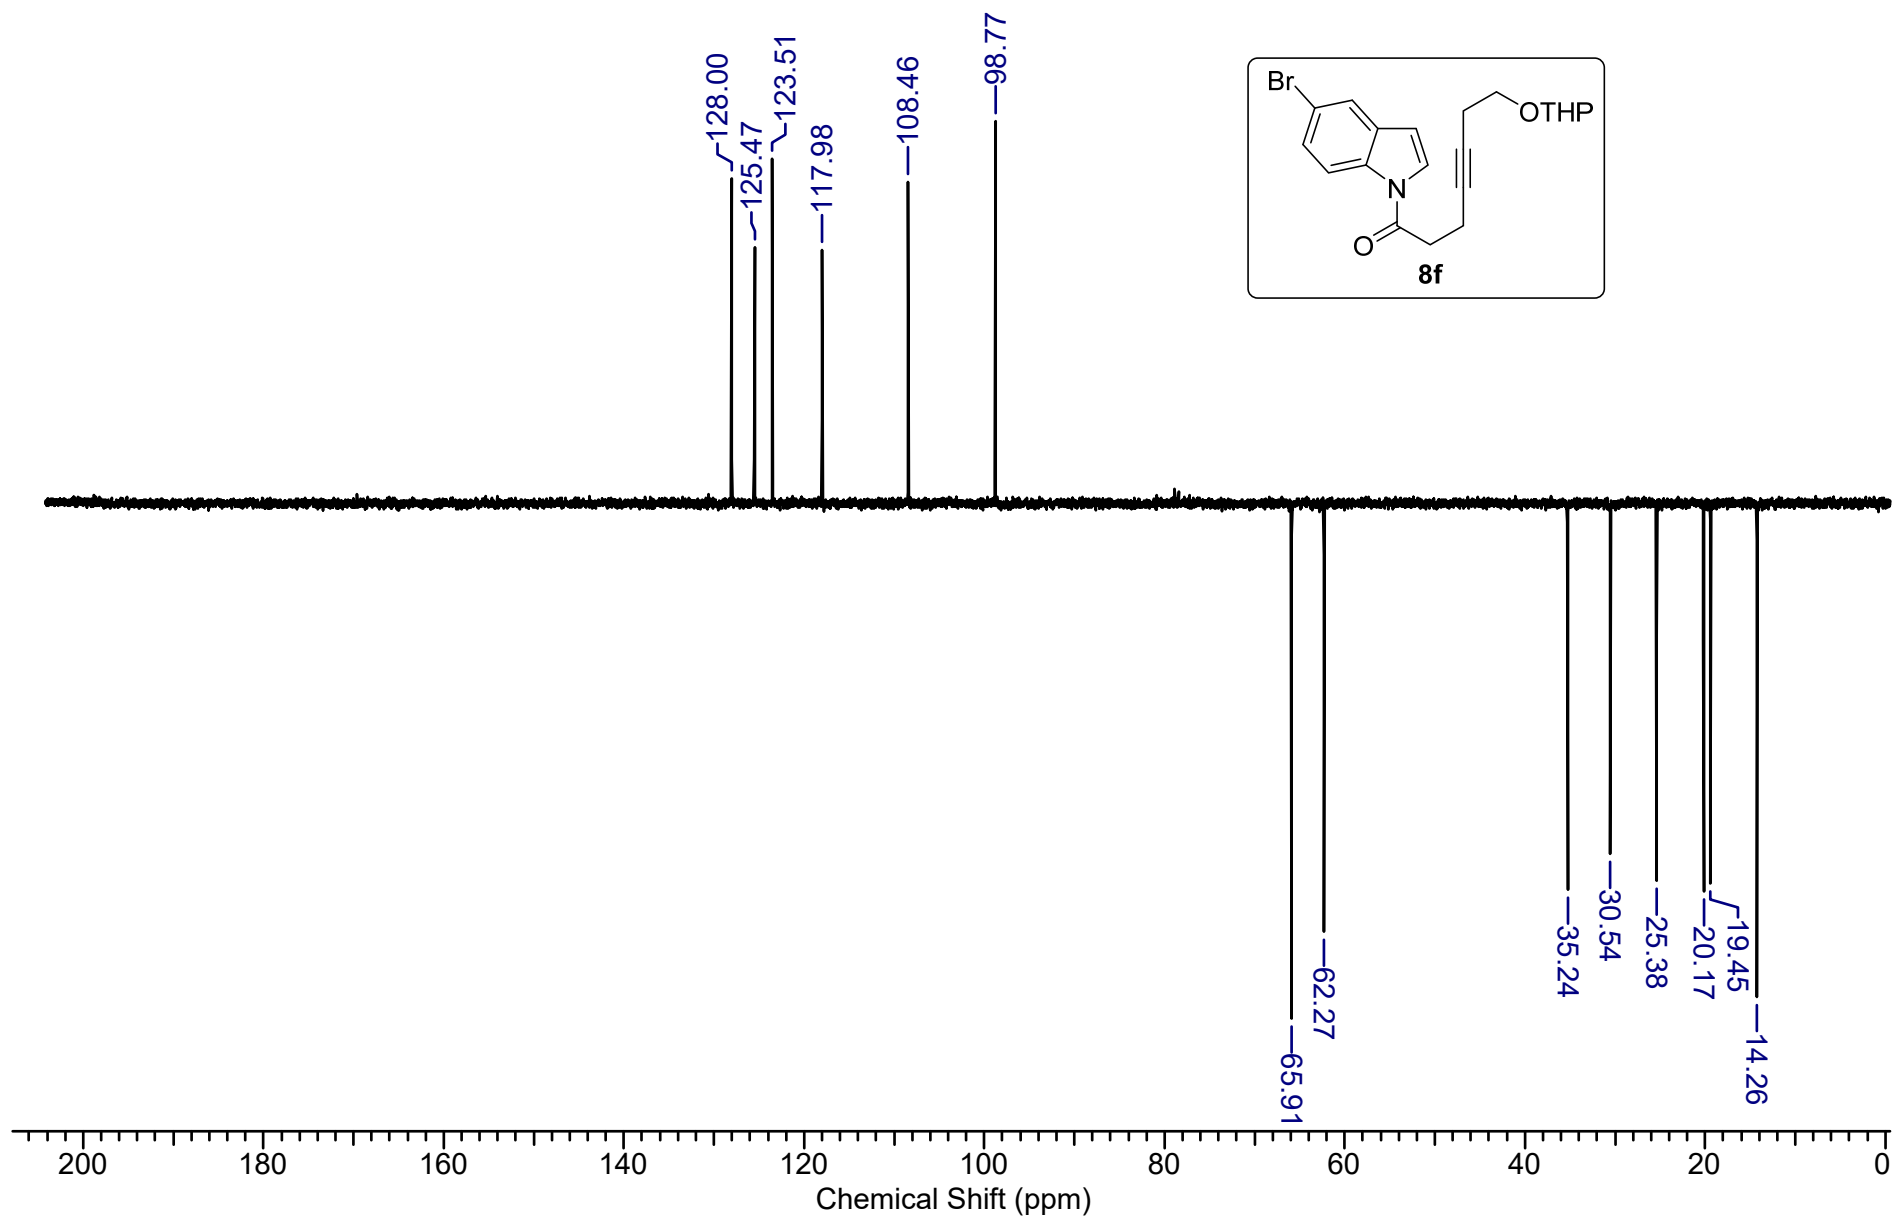

MSH-6 #378 RT: 2.05 AV: 1 NL: 9.54E7  
T: FTMS + p ESI Full ms [100.0000-1500.0000]

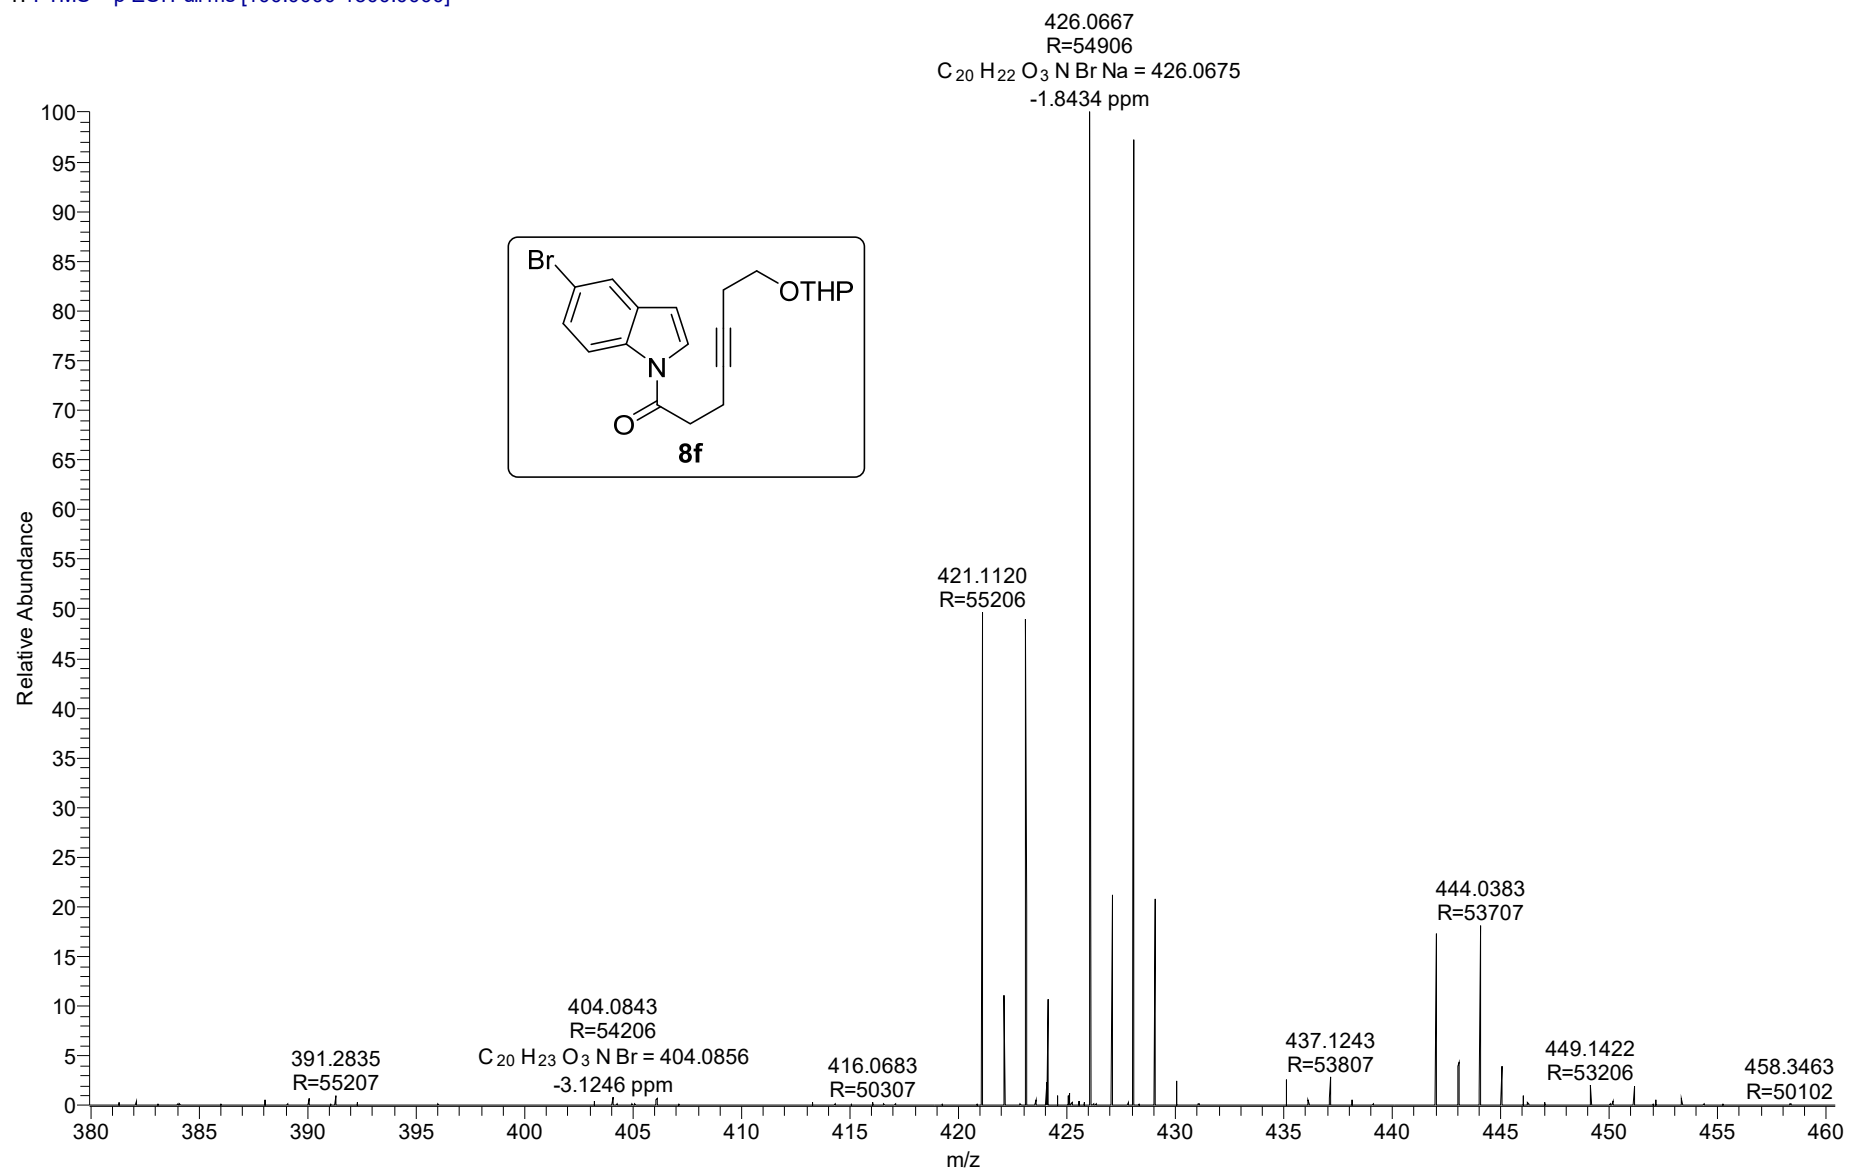

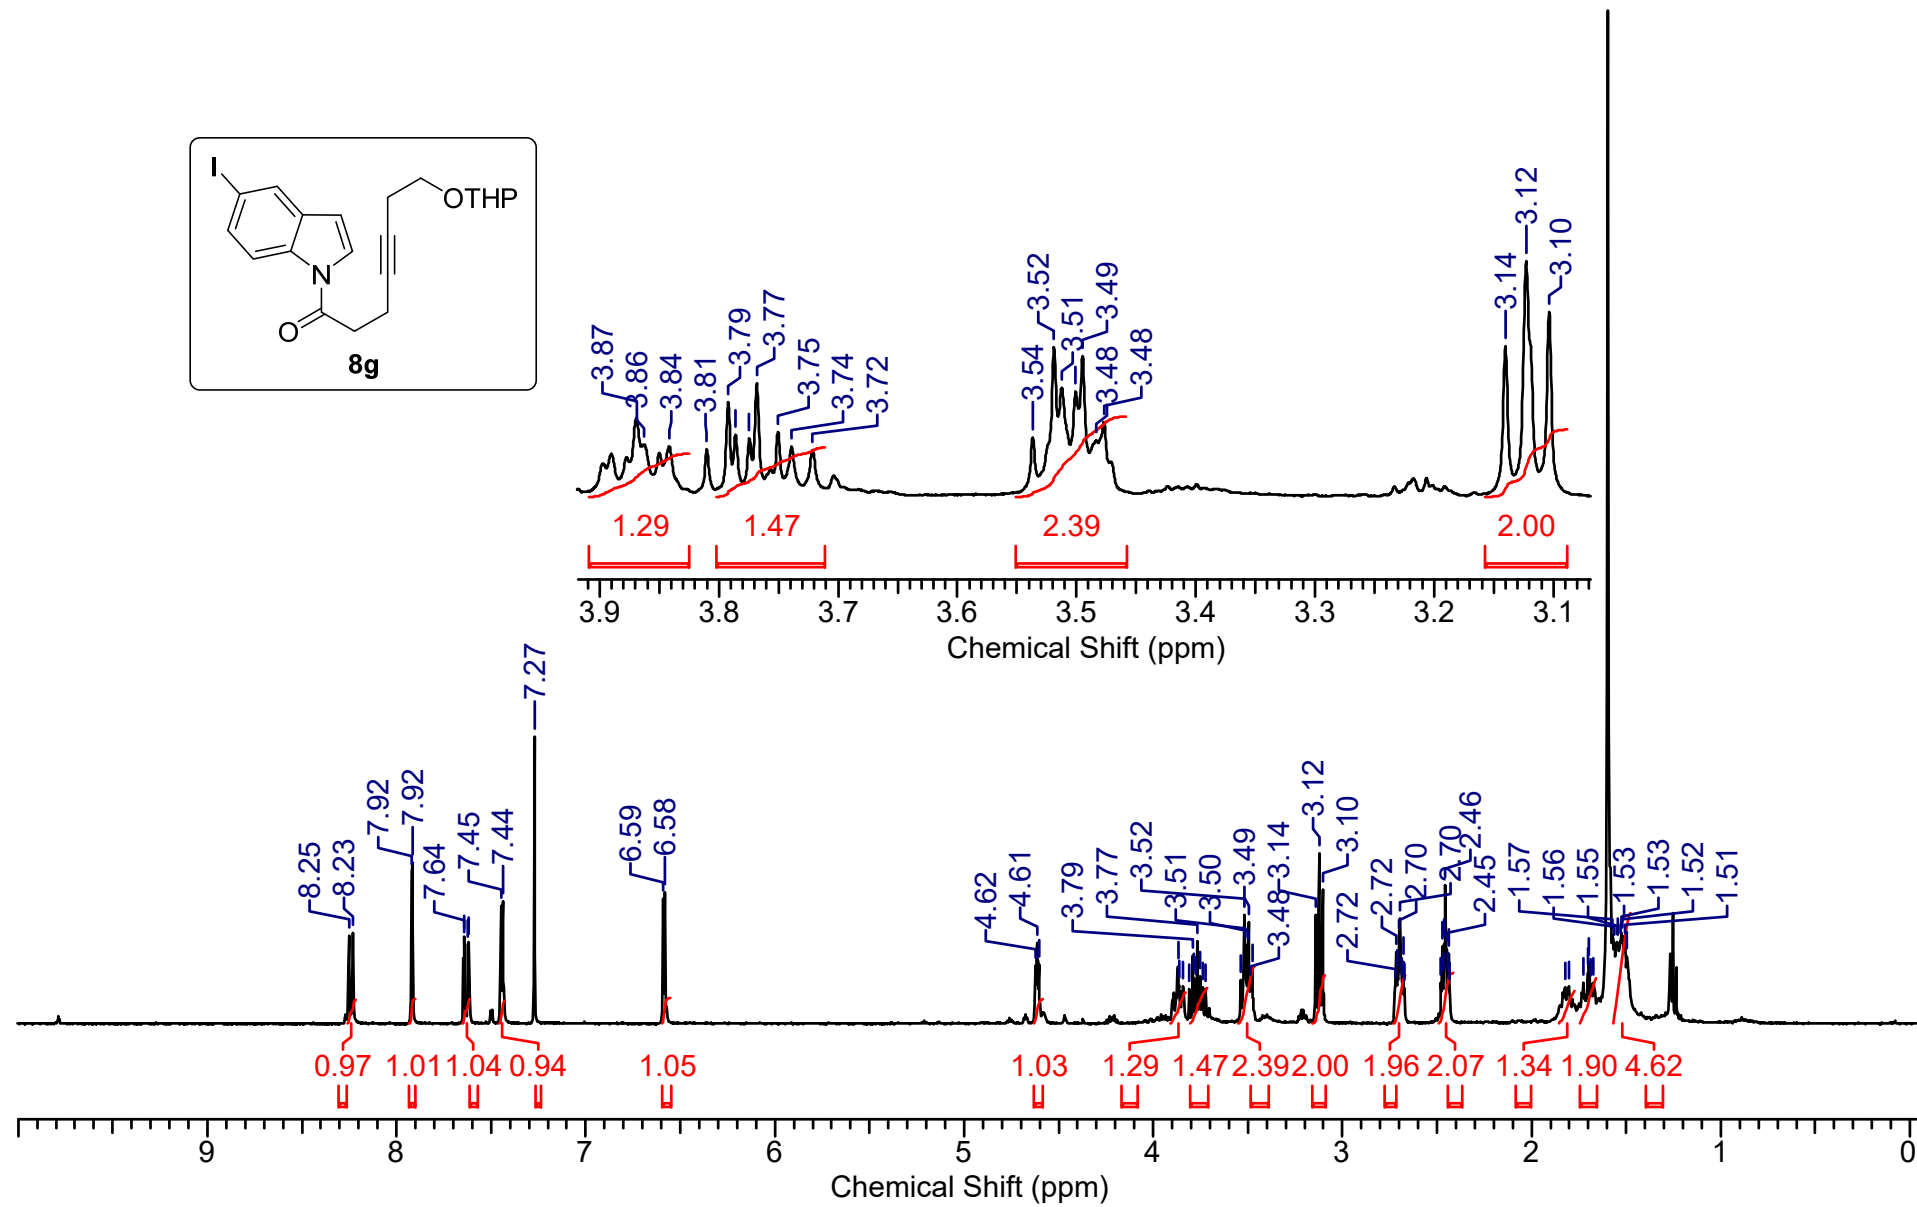

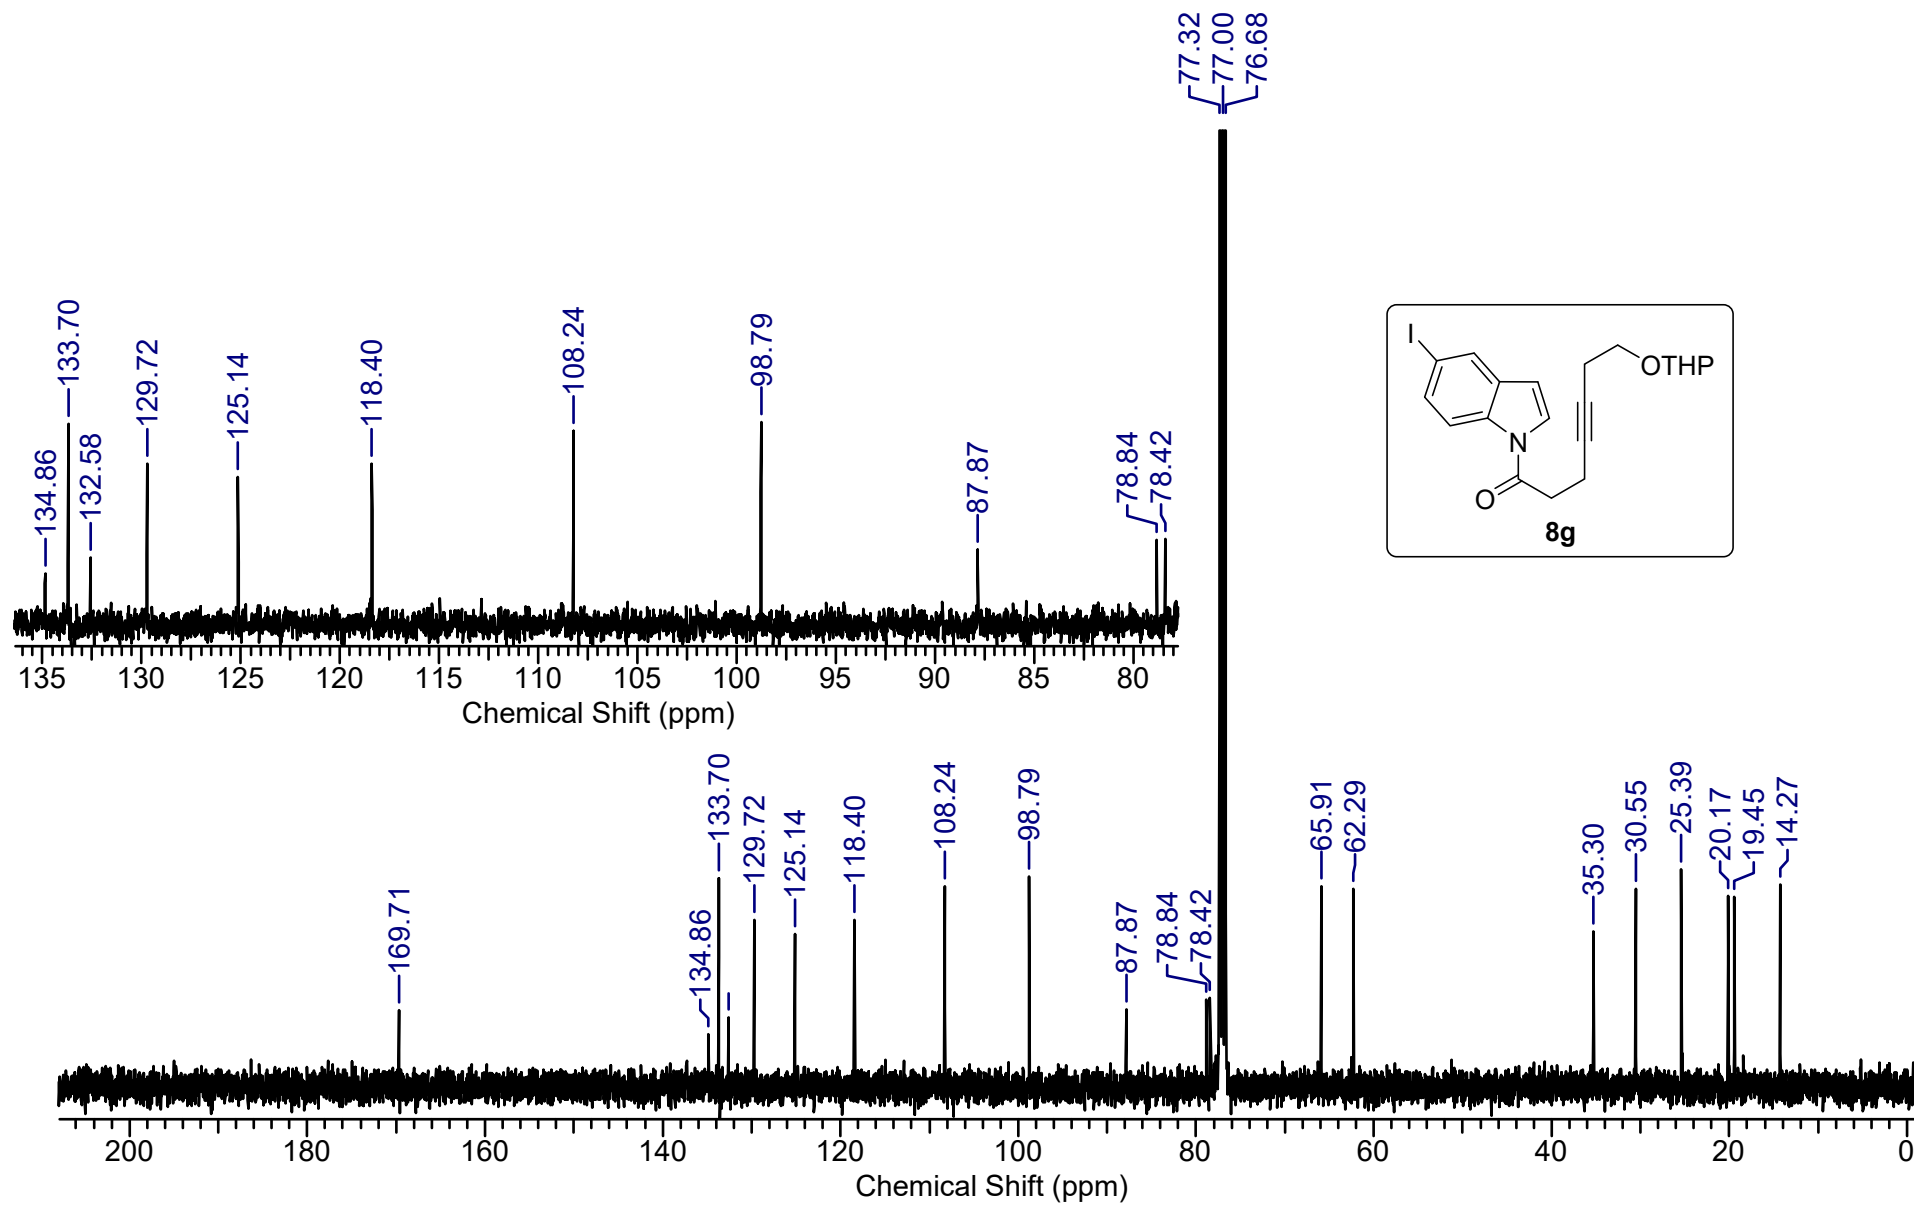

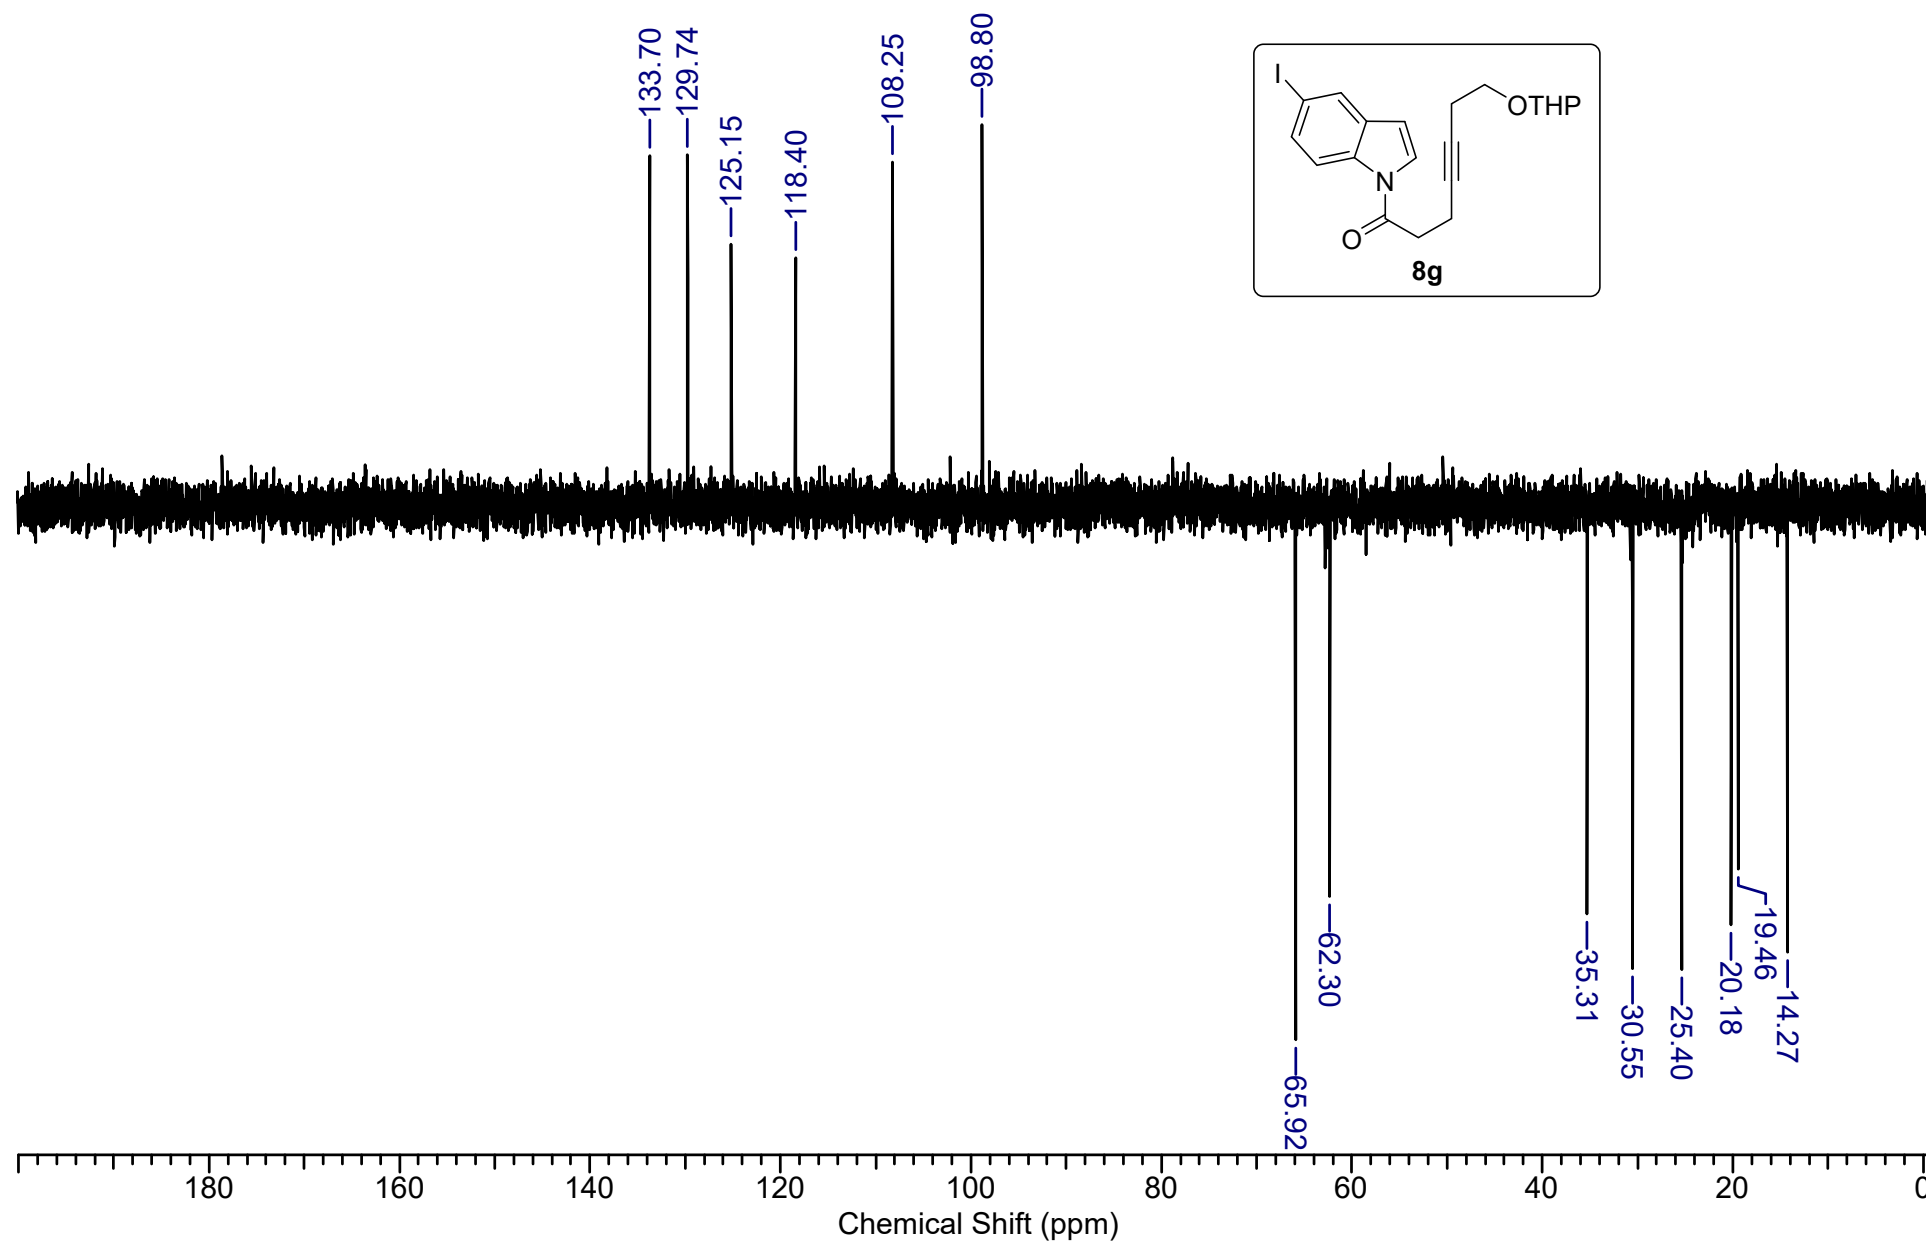

MSH-7 #364 RT: 1.97 AV: 1 NL: 3.37E8  
T: FTMS + p ESI Full ms [100.0000-1500.0000]

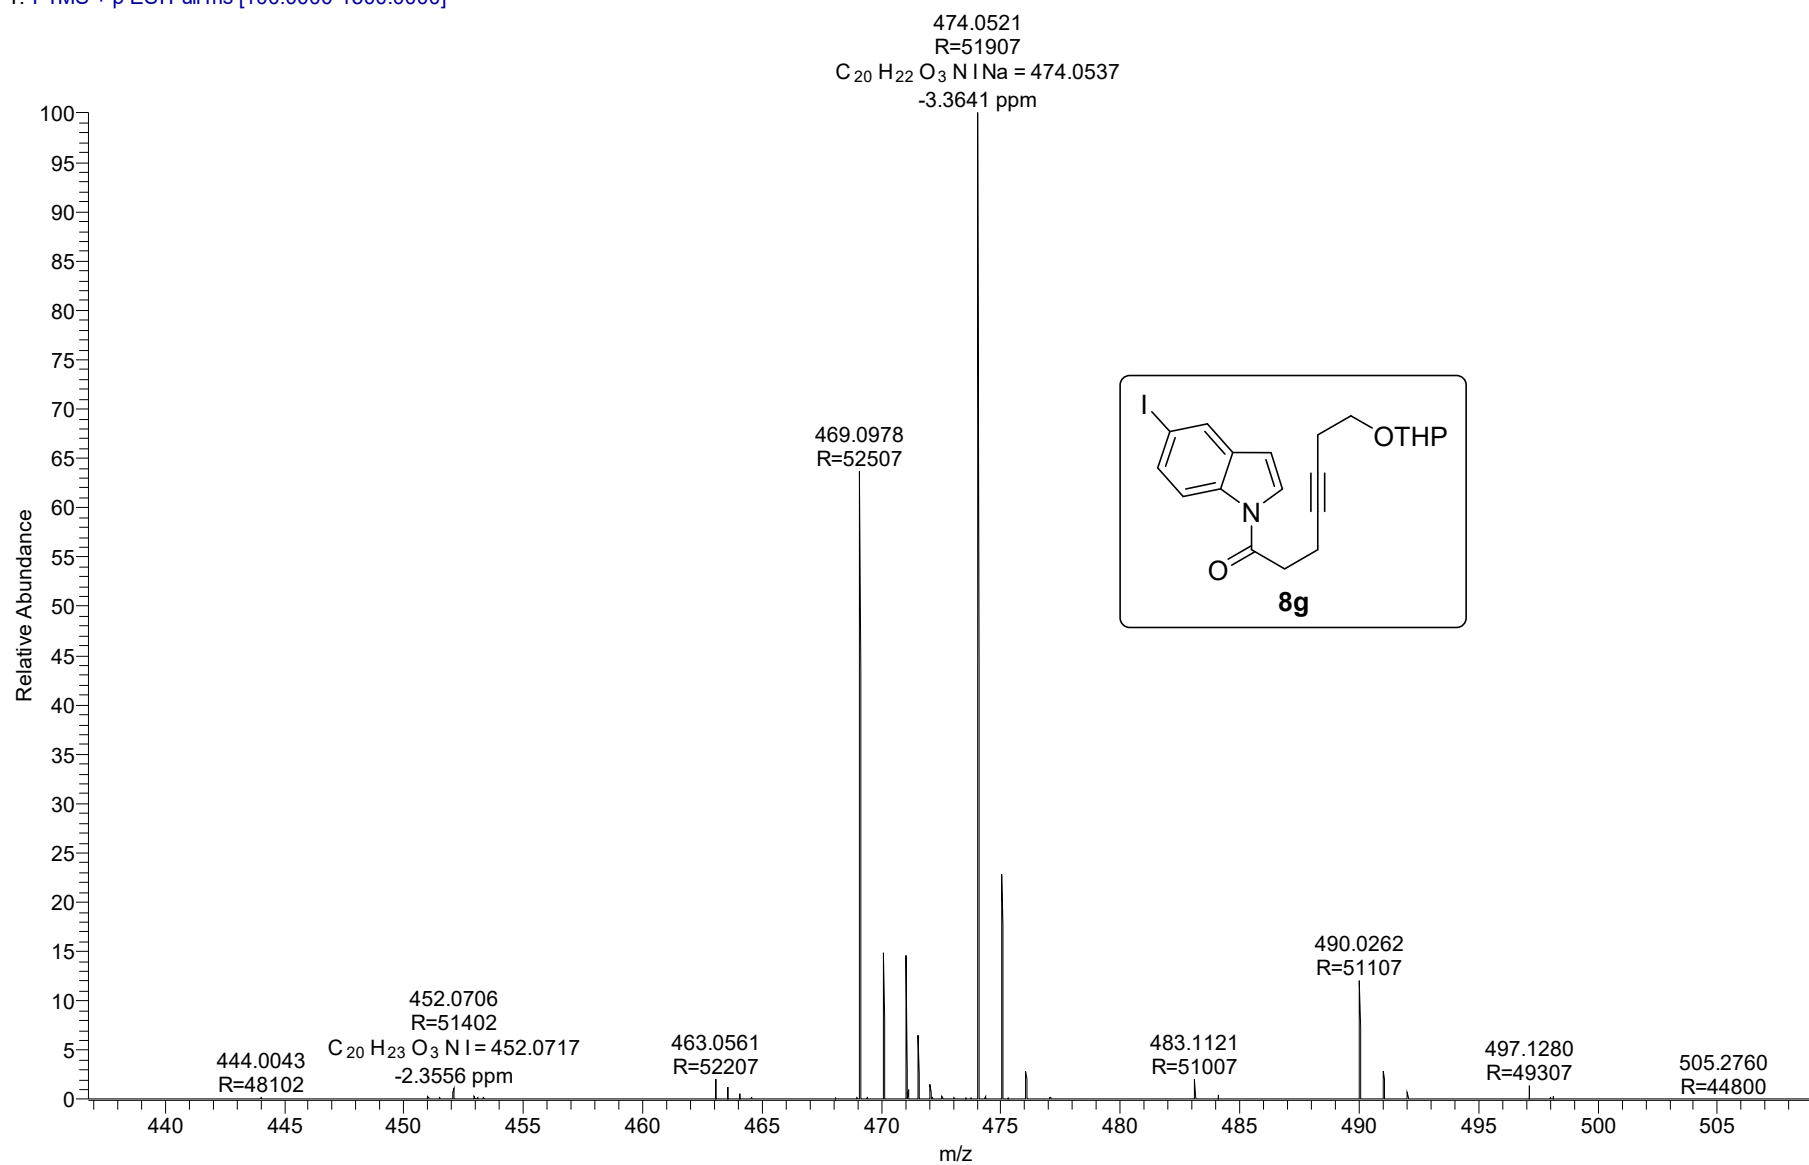



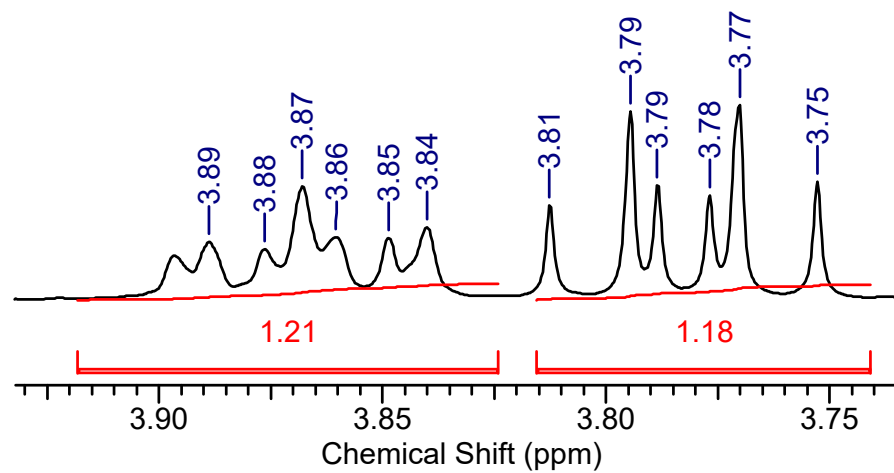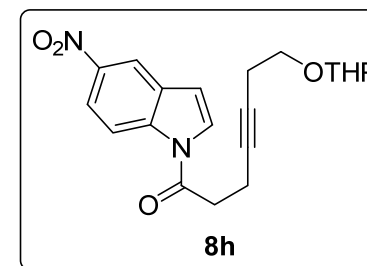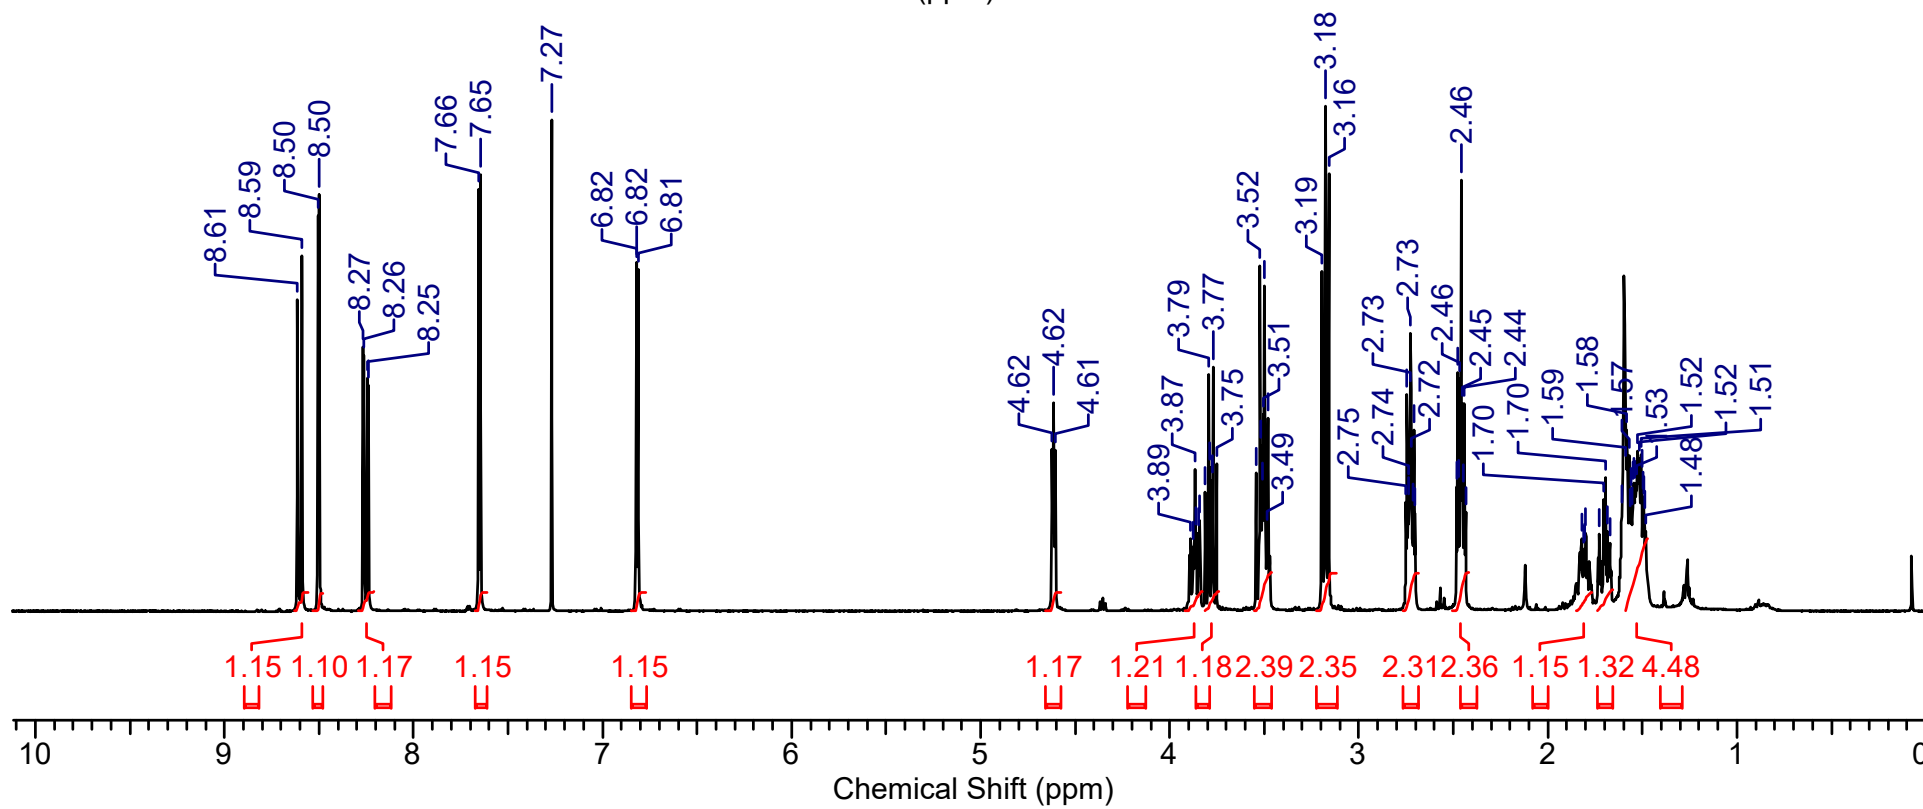

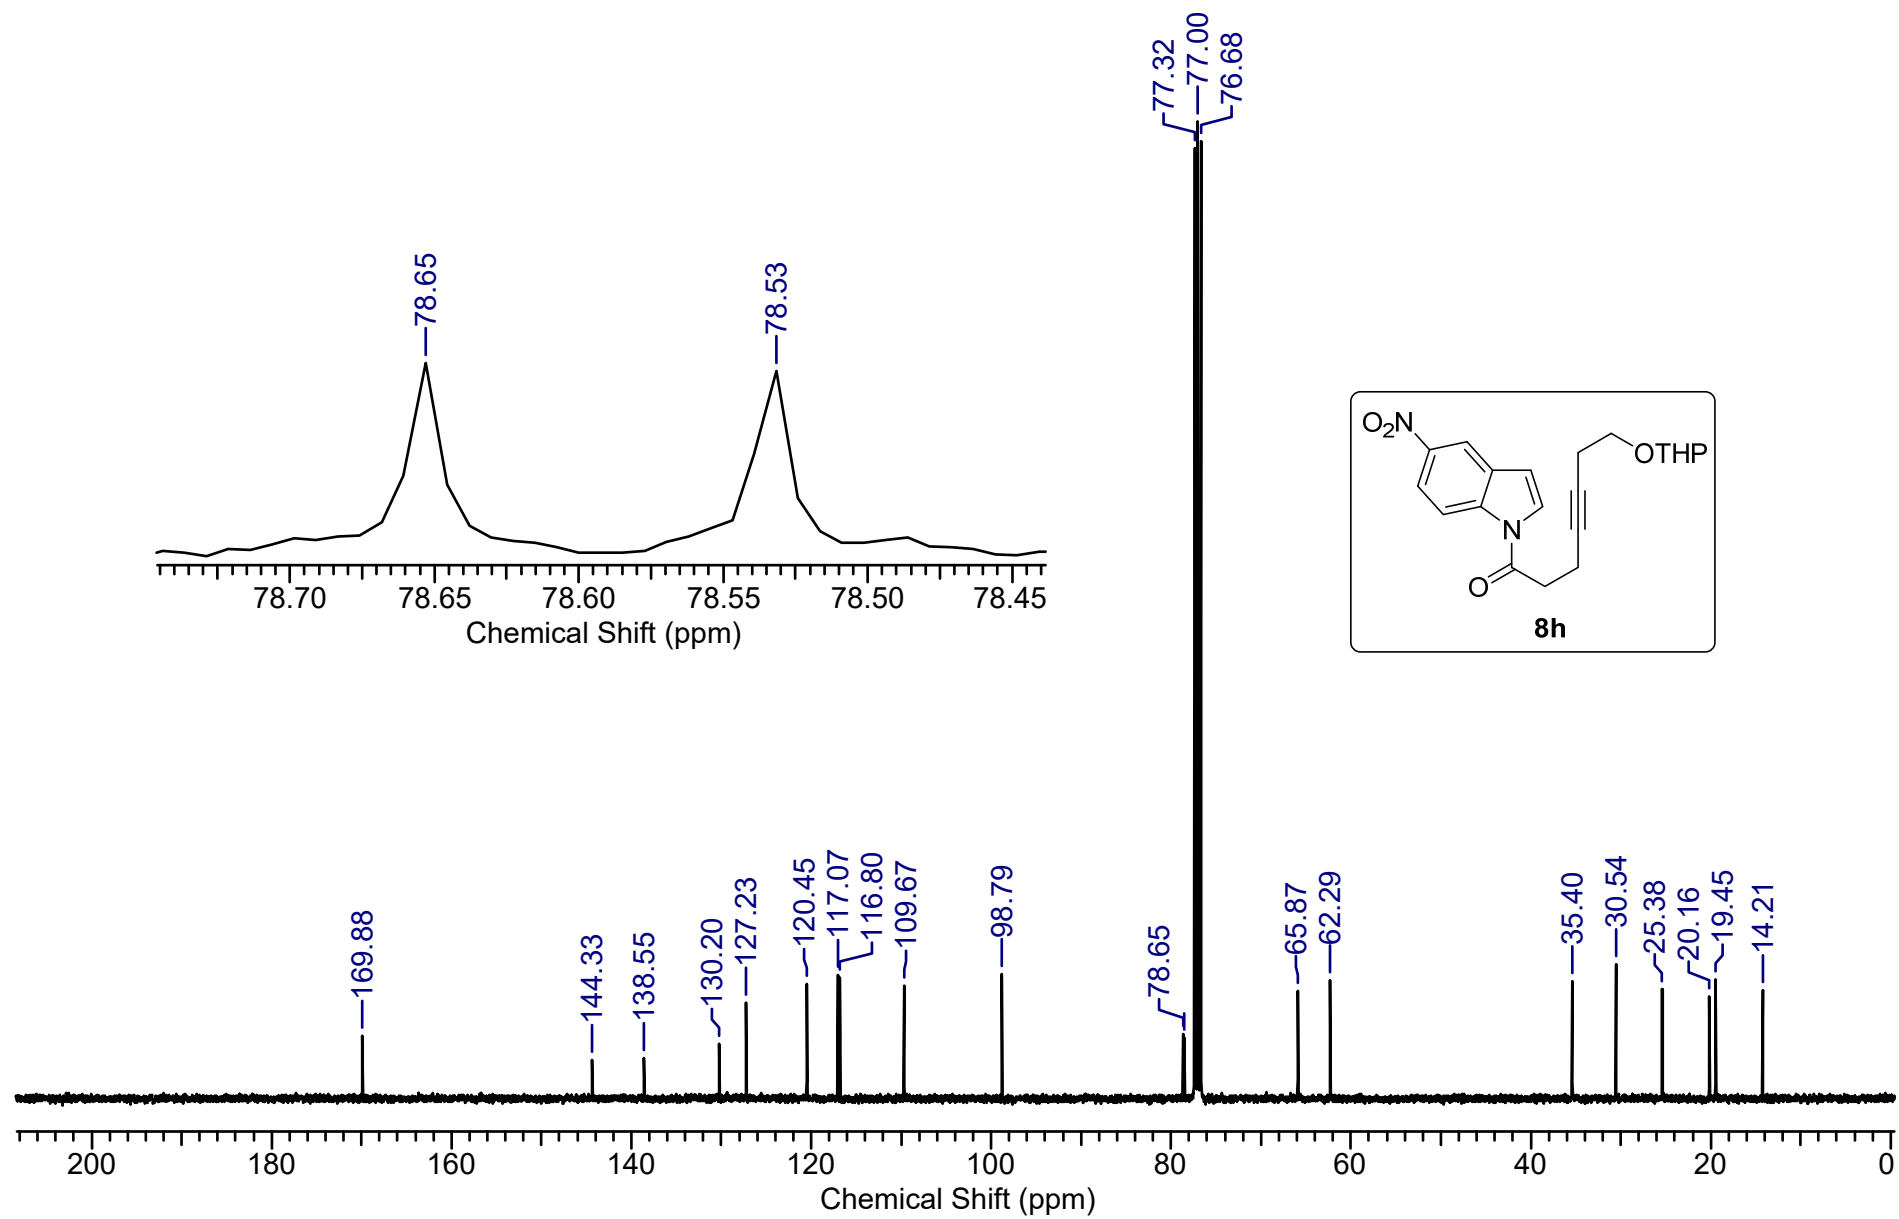

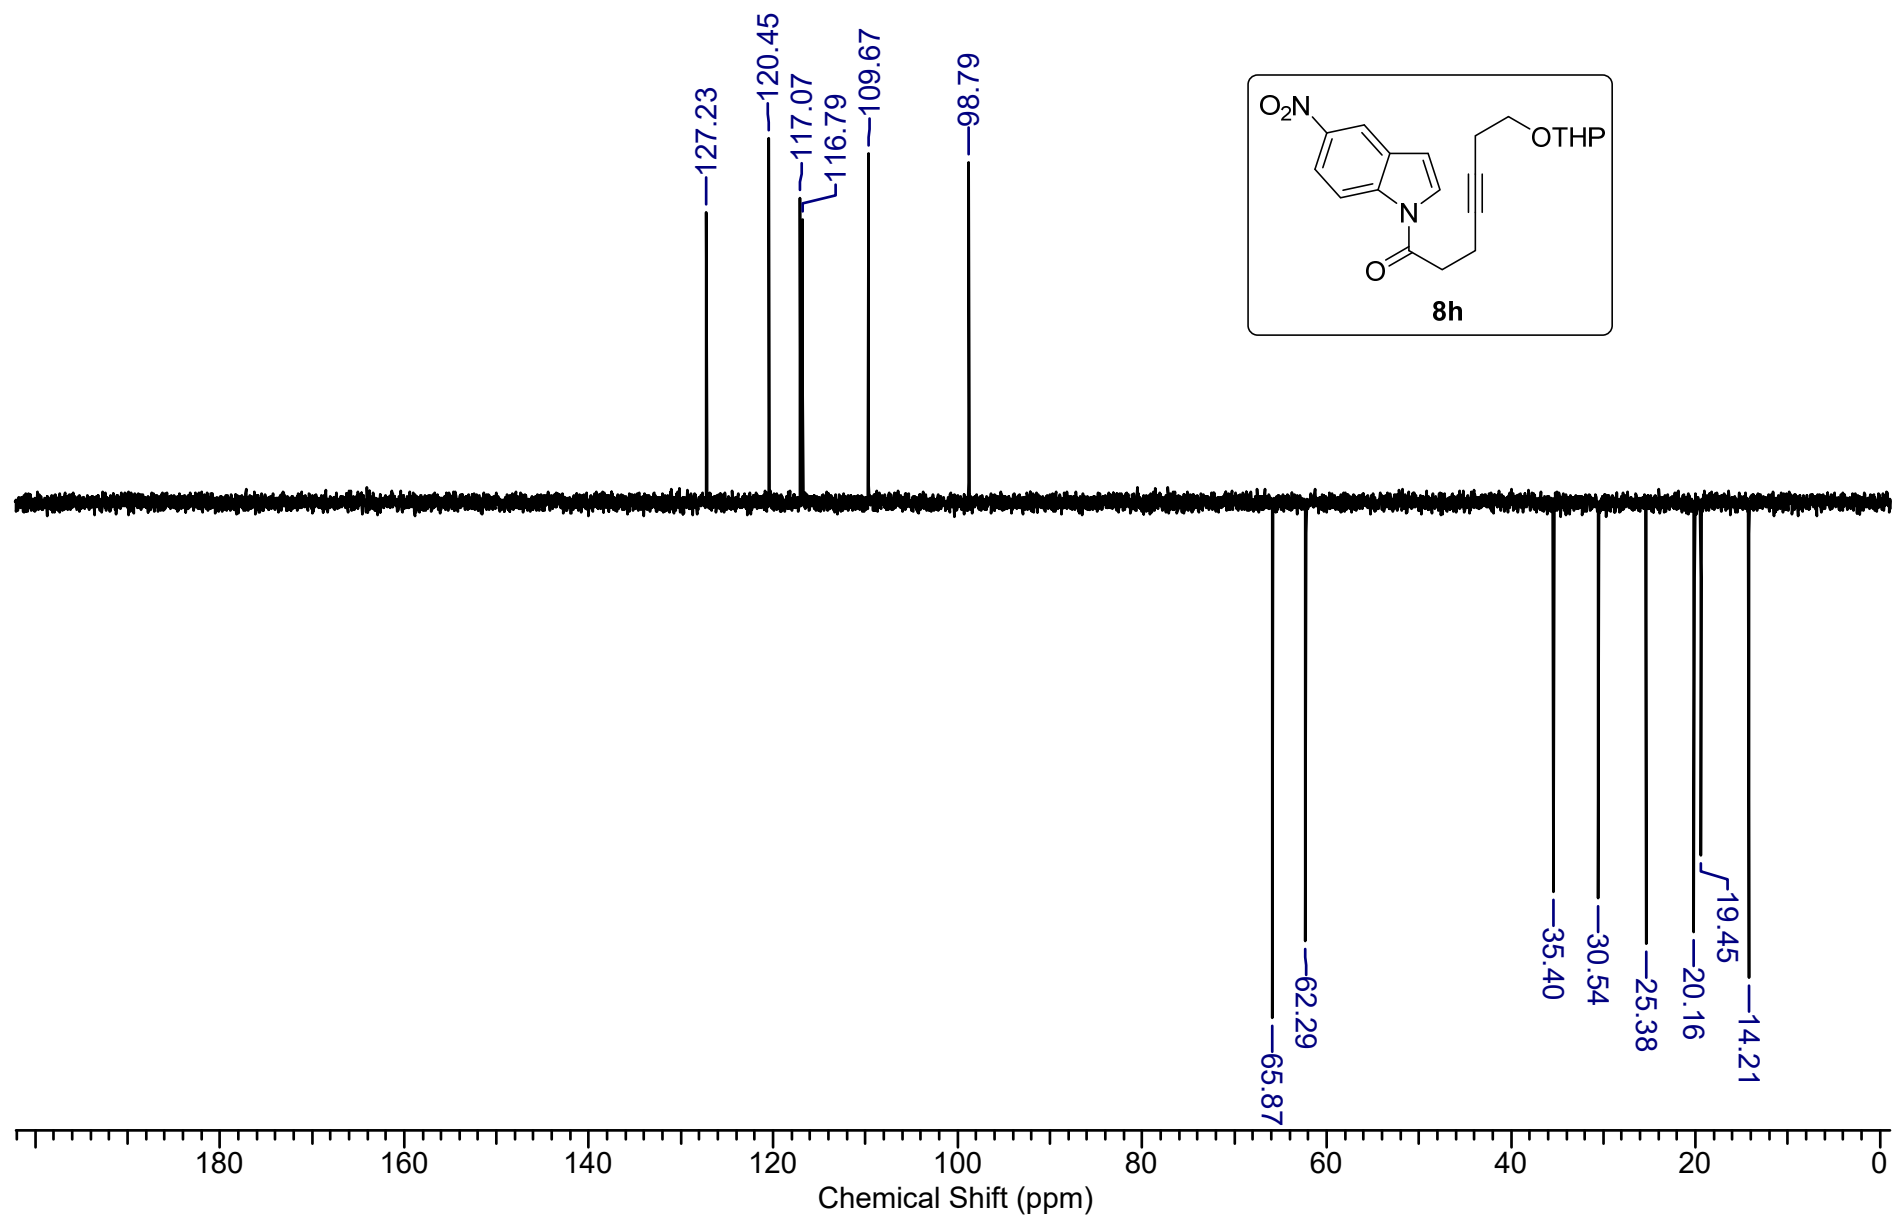

MSH-8 #302 RT: 1.64 AV: 1 NL: 3.56E8  
T: FTMS + p ESI Full ms [100.0000-1500.0000]

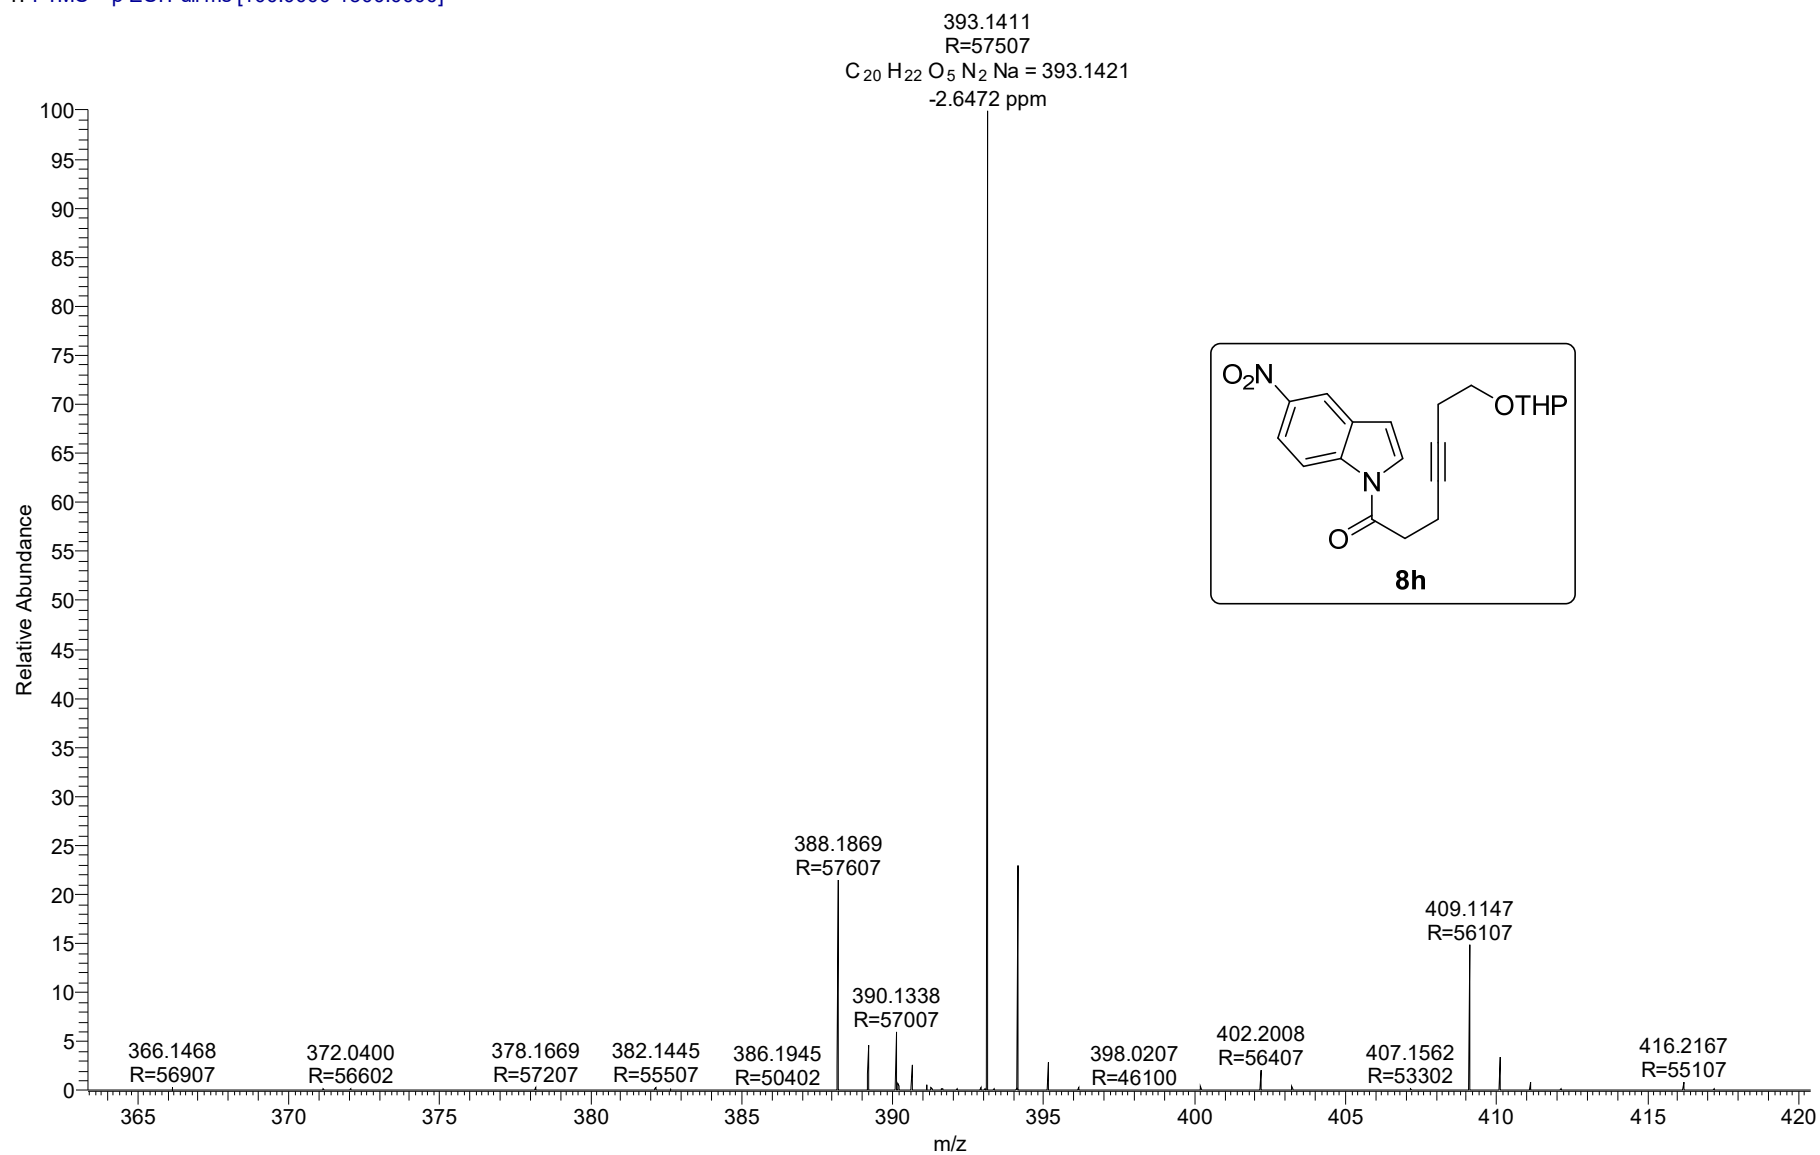

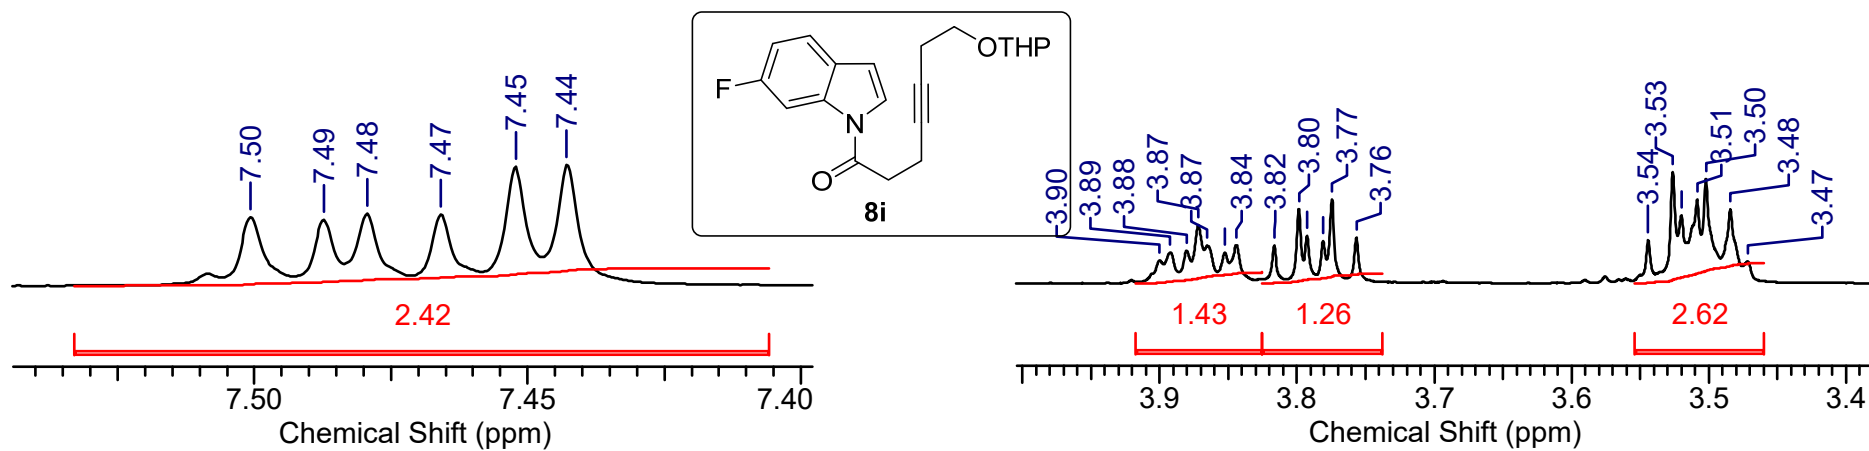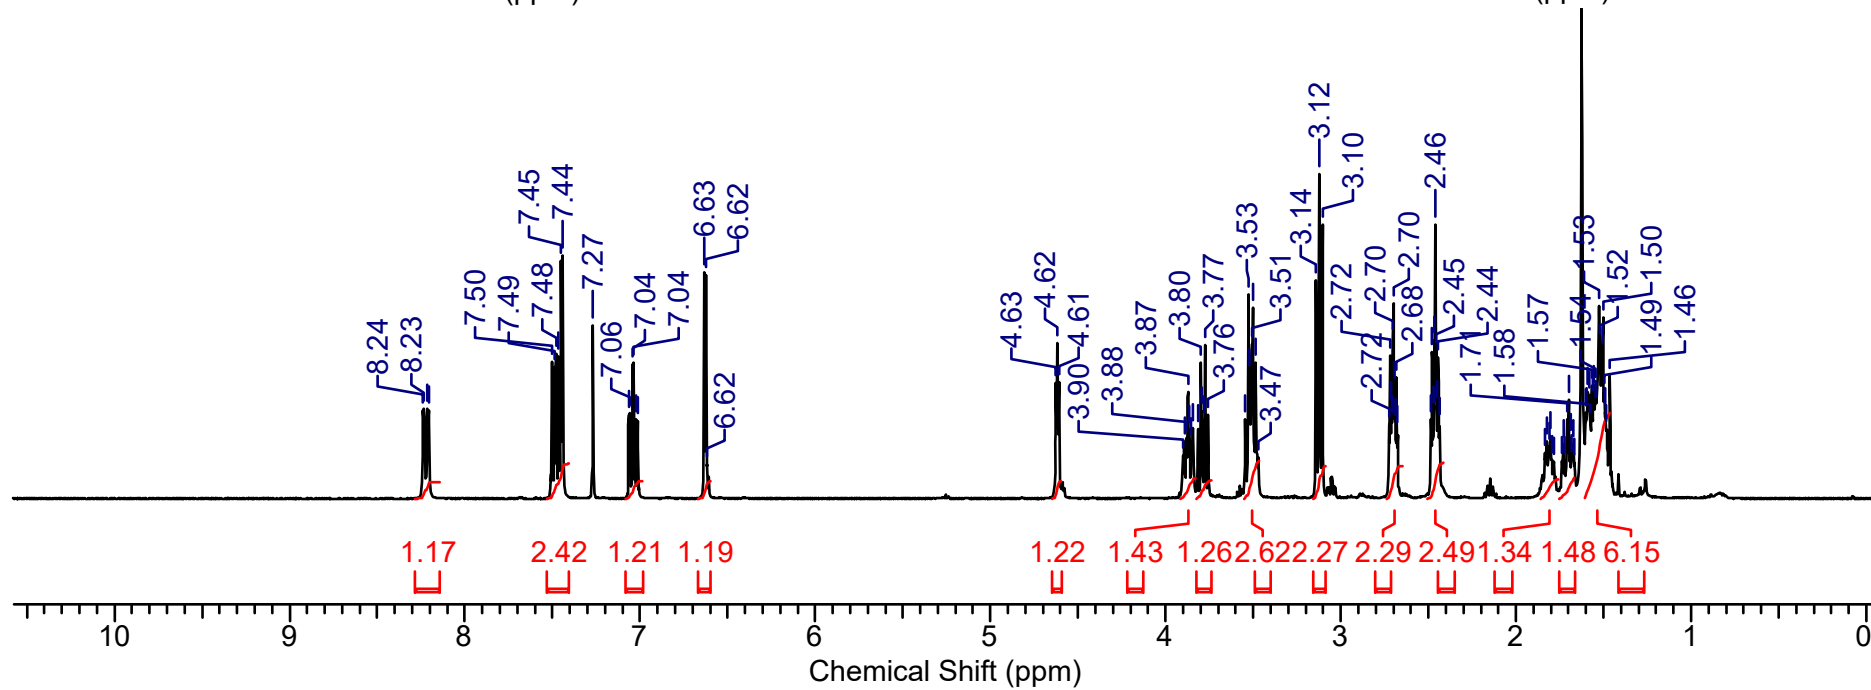

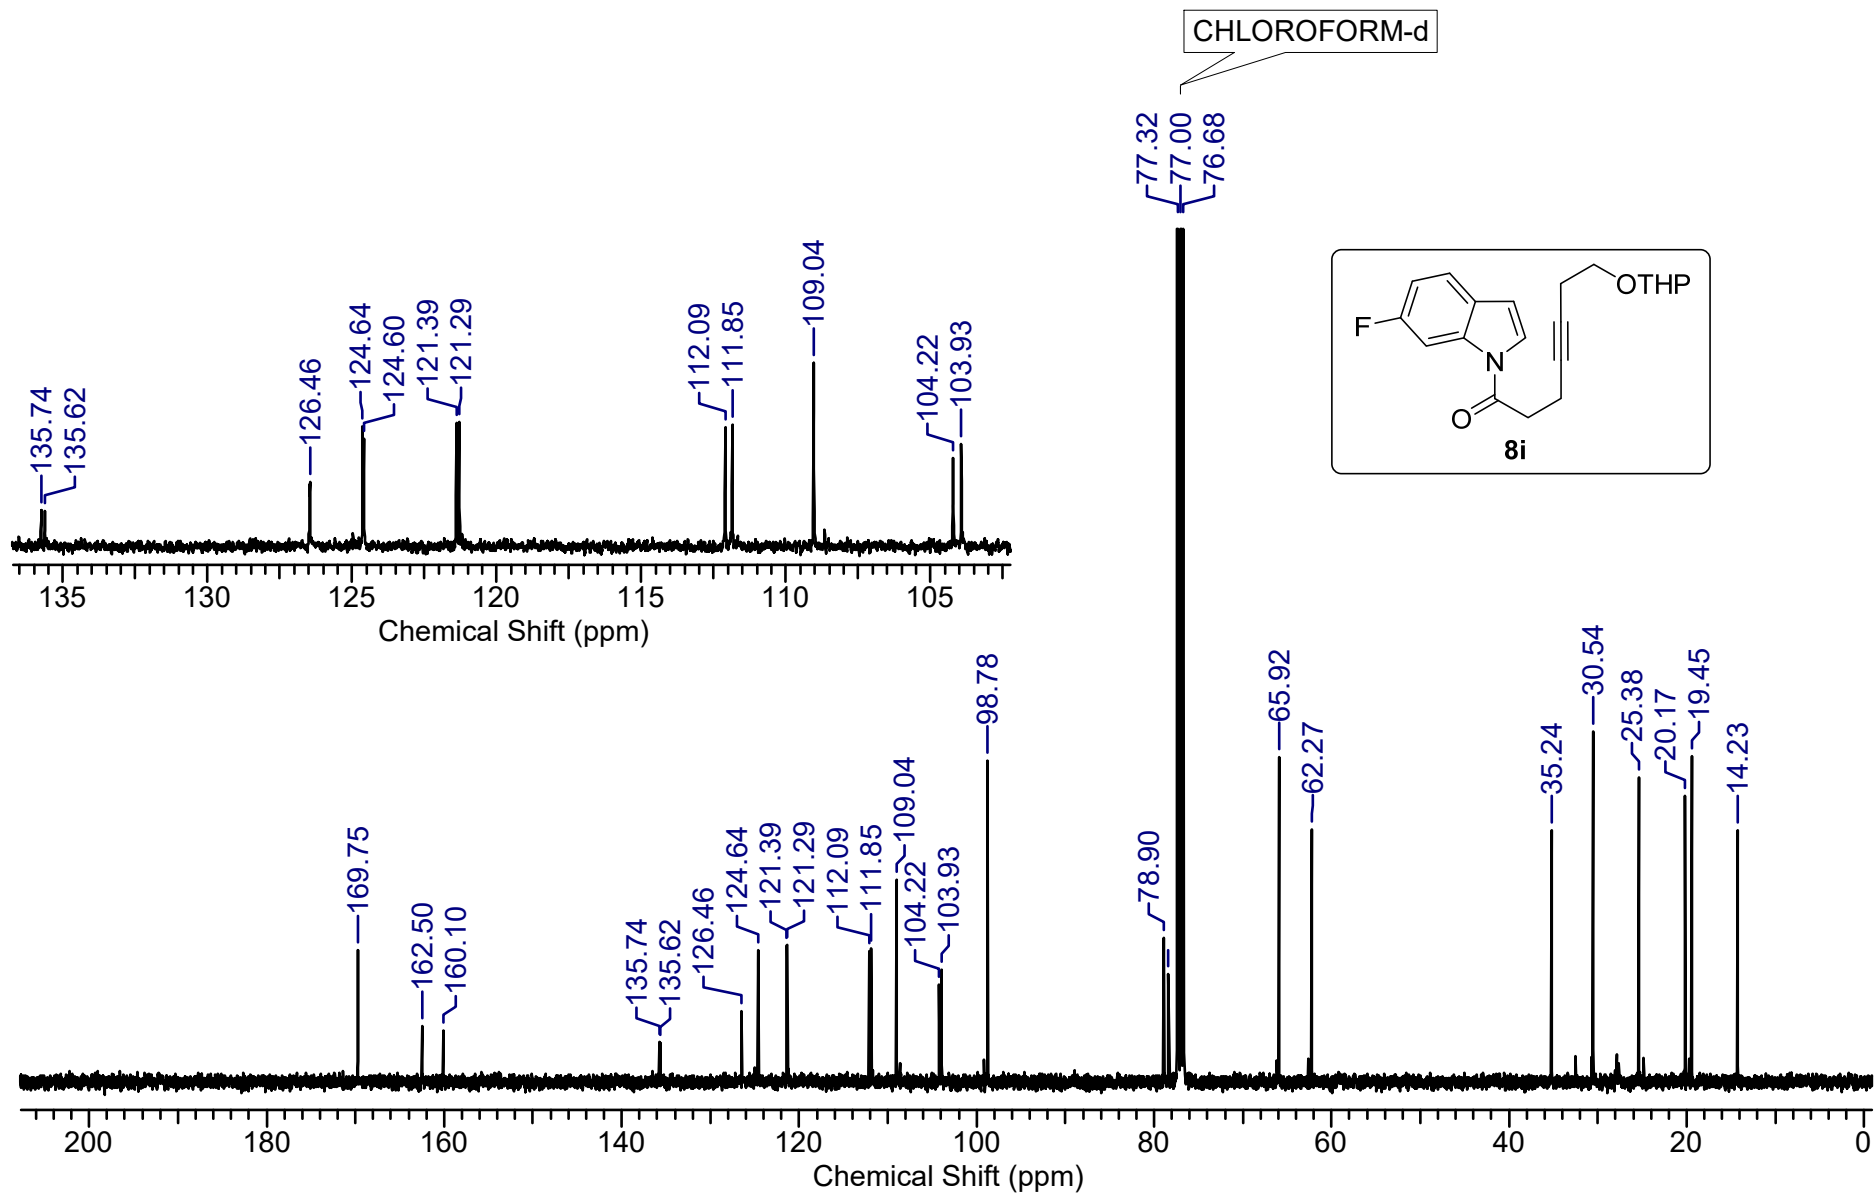

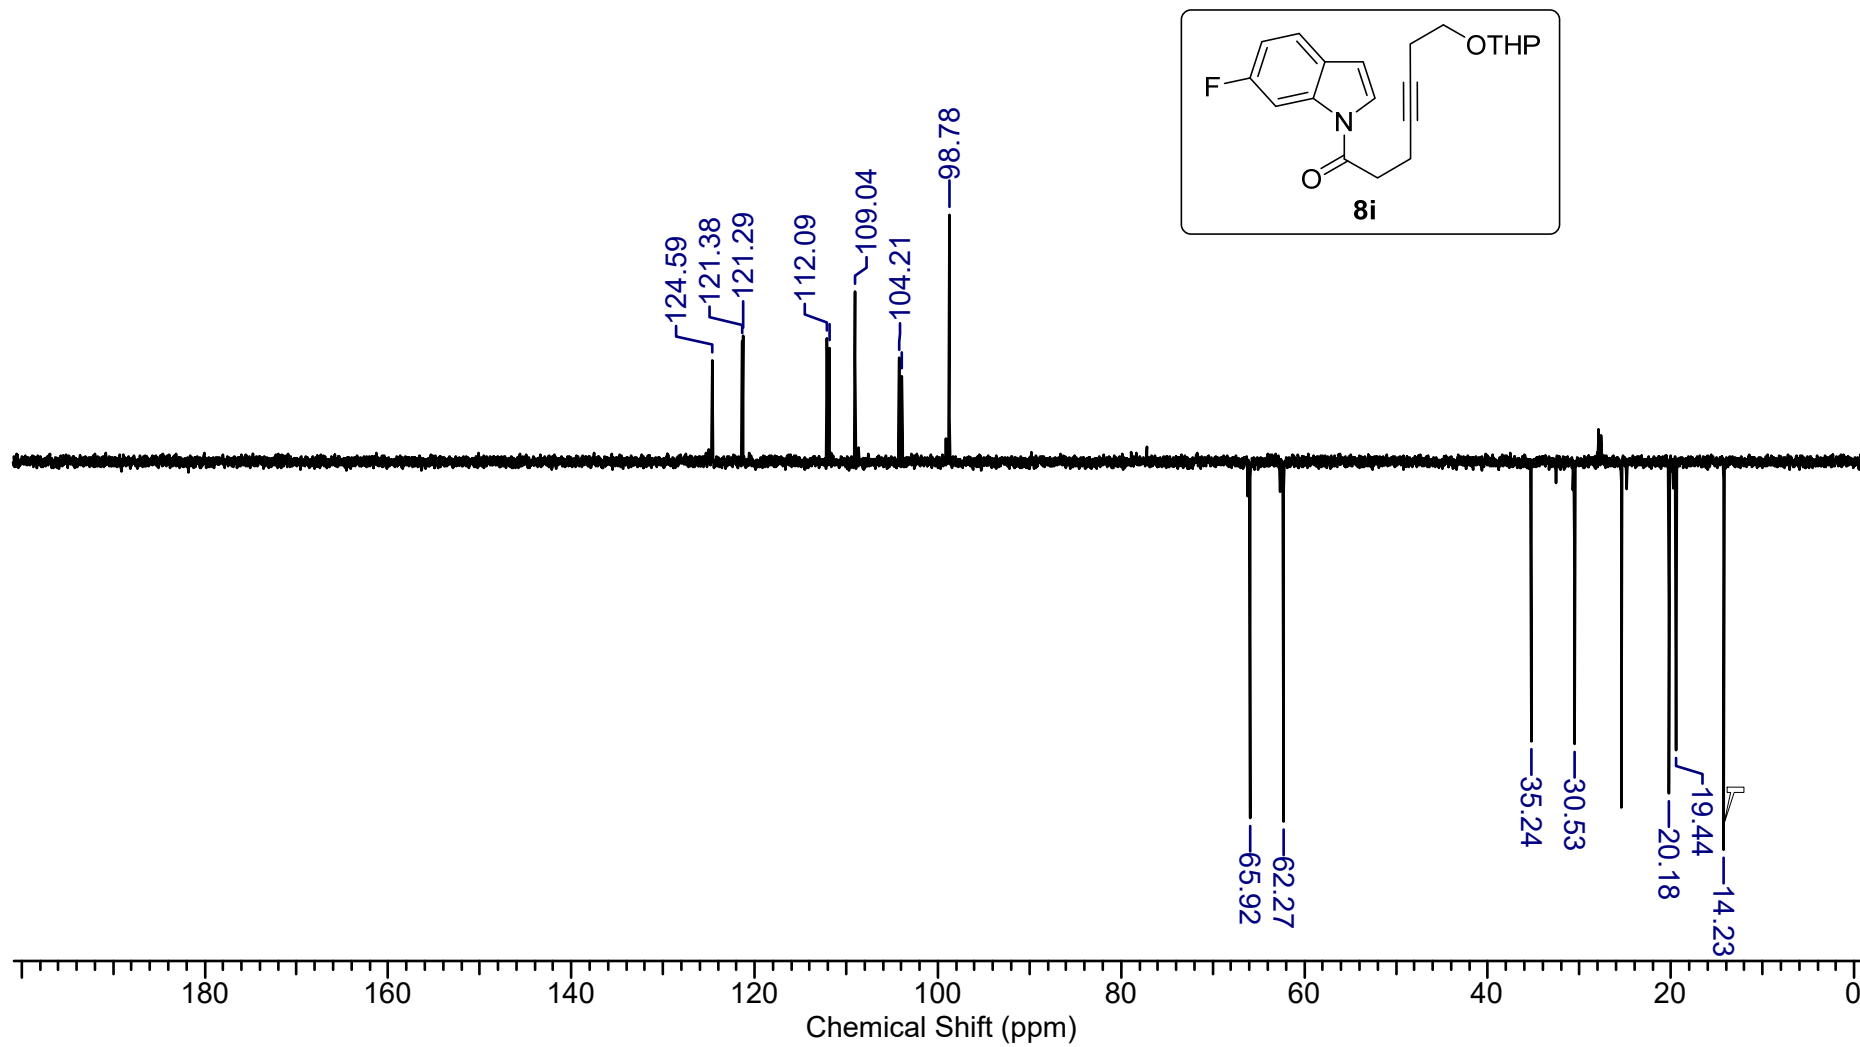

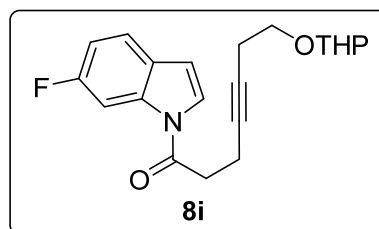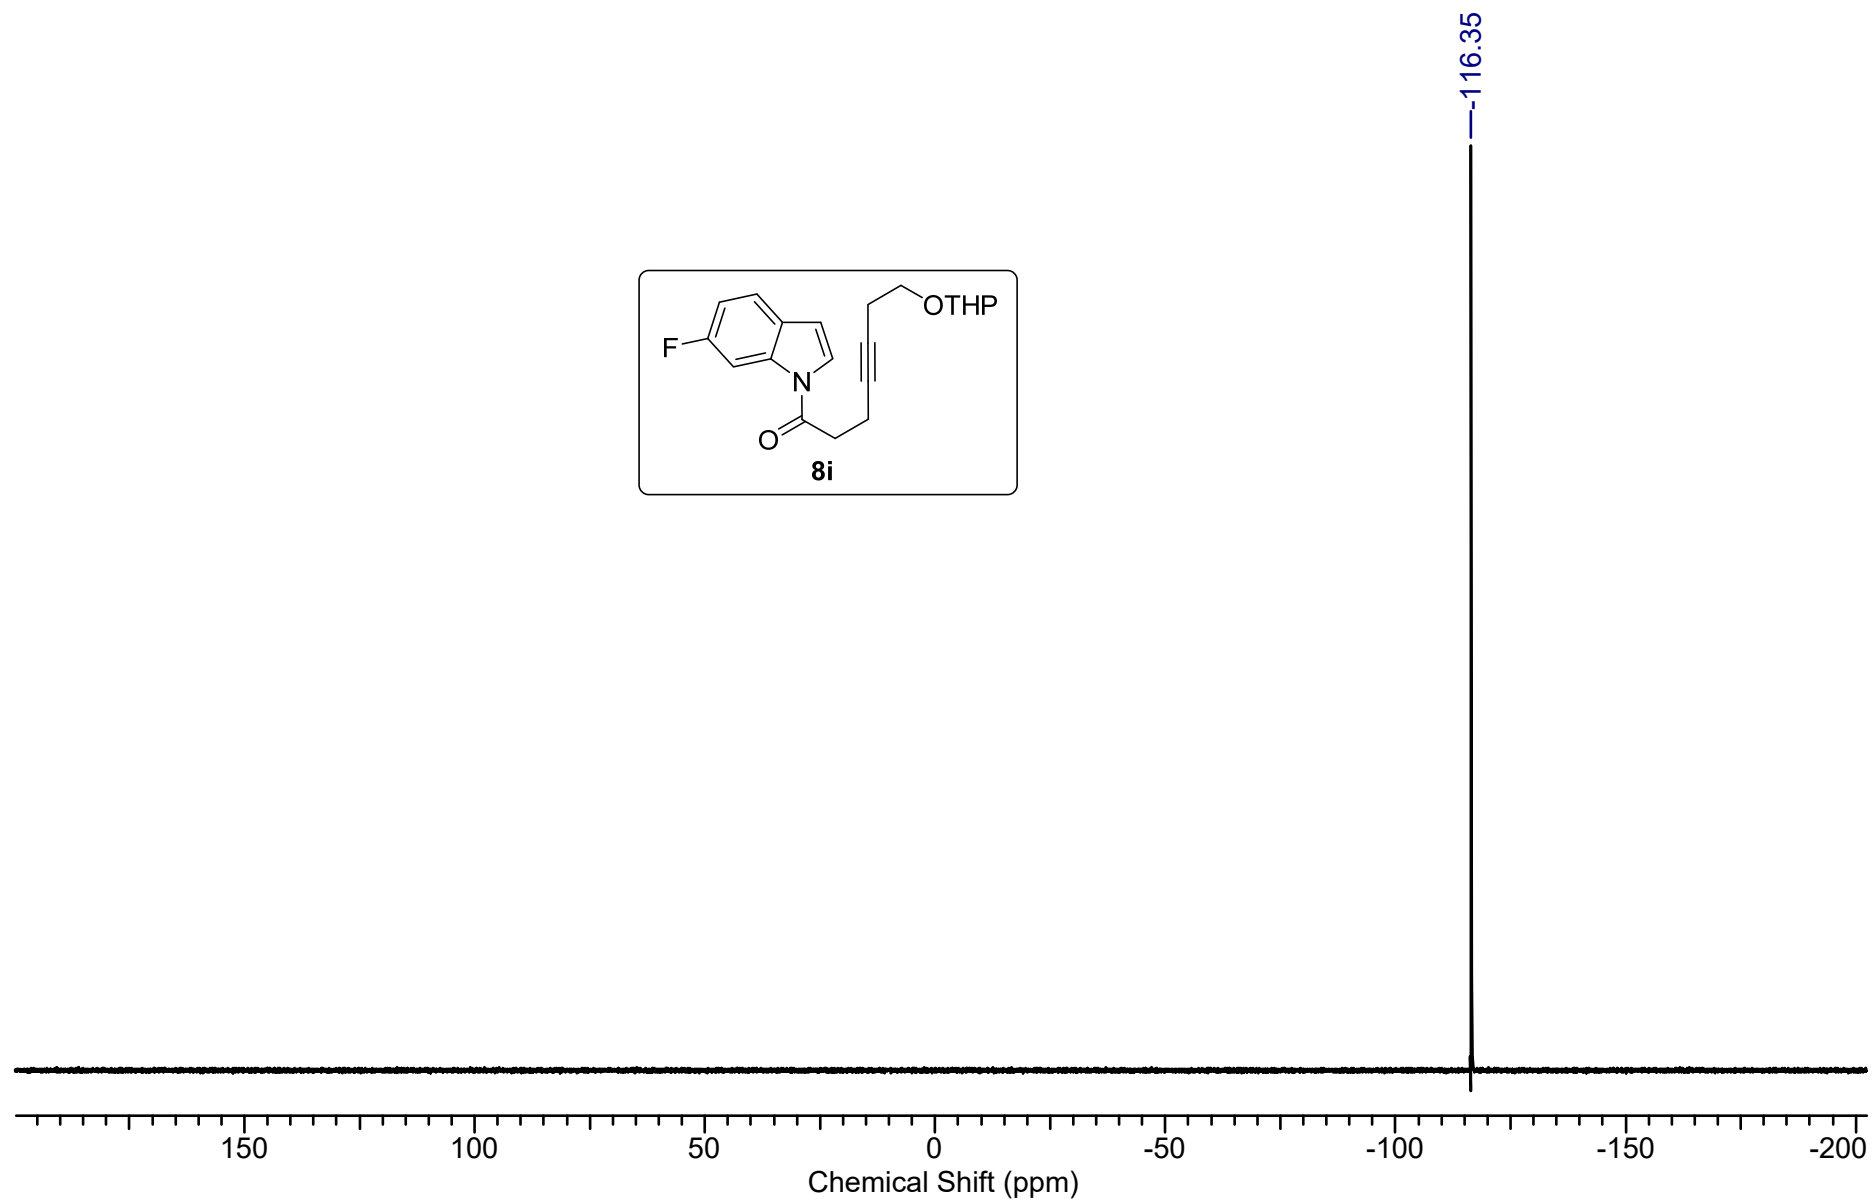



MSH-4a #367 RT: 1.99 AV: 1 NL: 8.95E7  
T: FTMS + p ESI Full ms [100.0000-1500.0000]

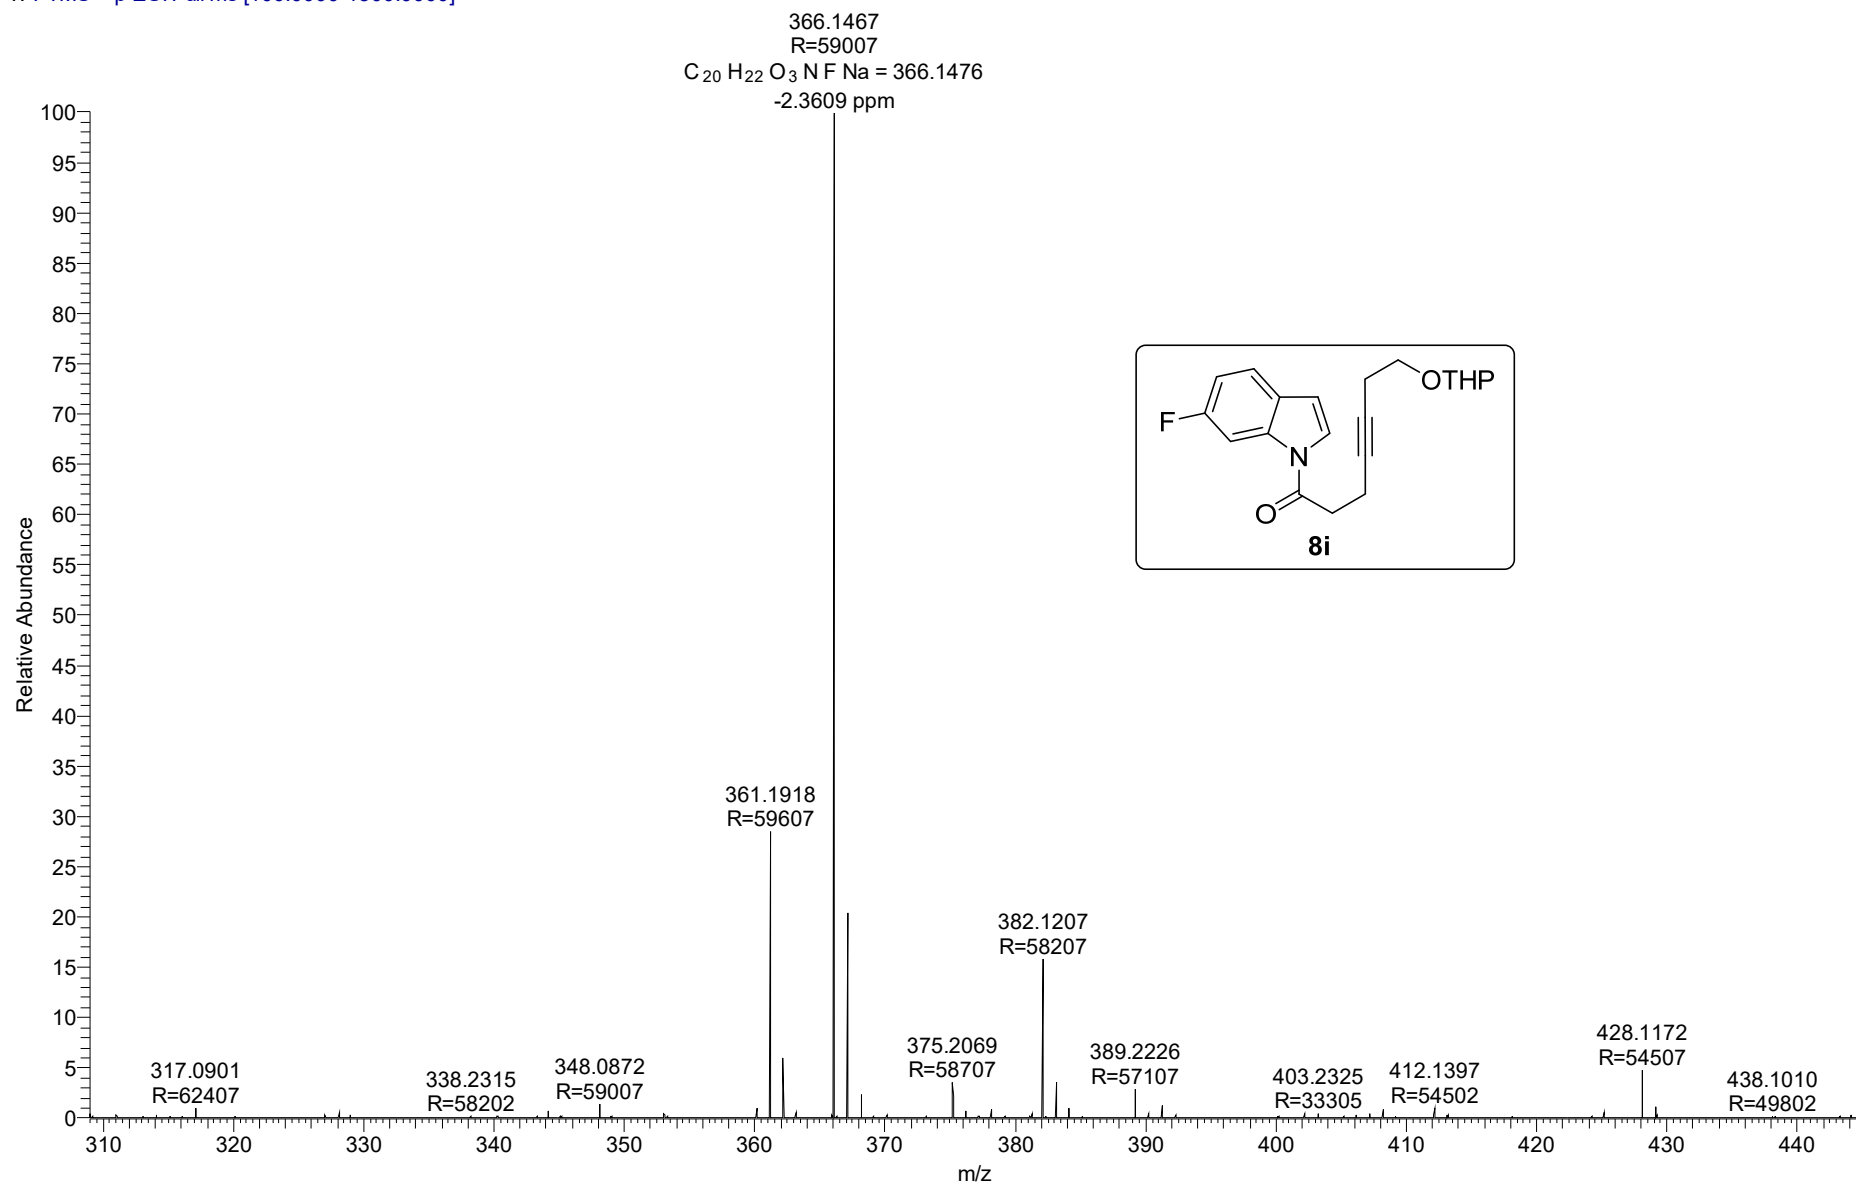

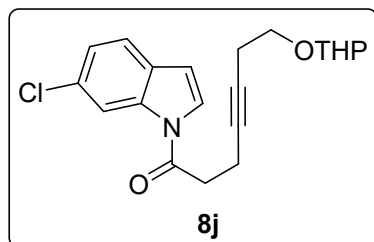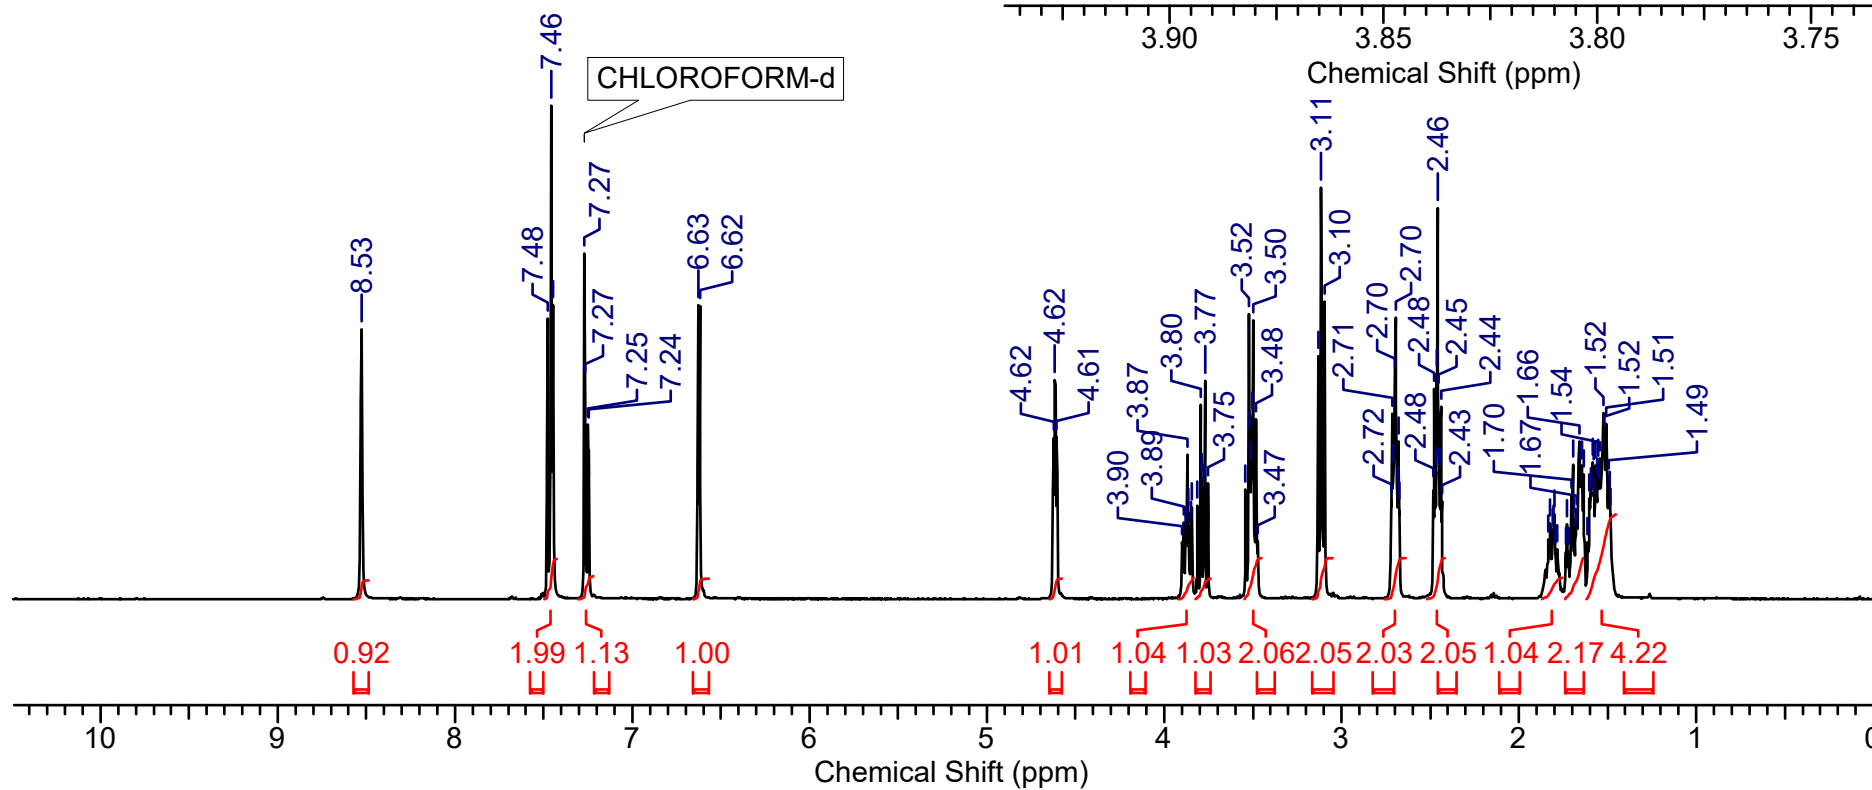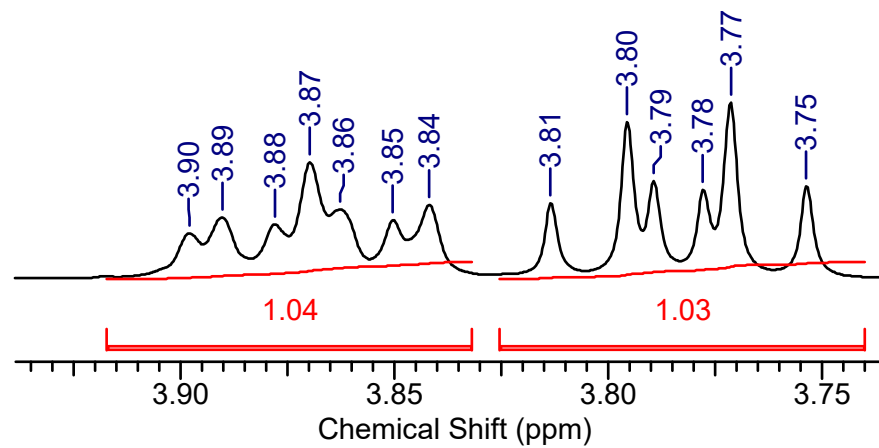

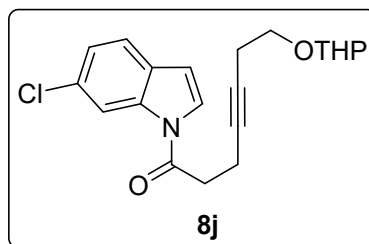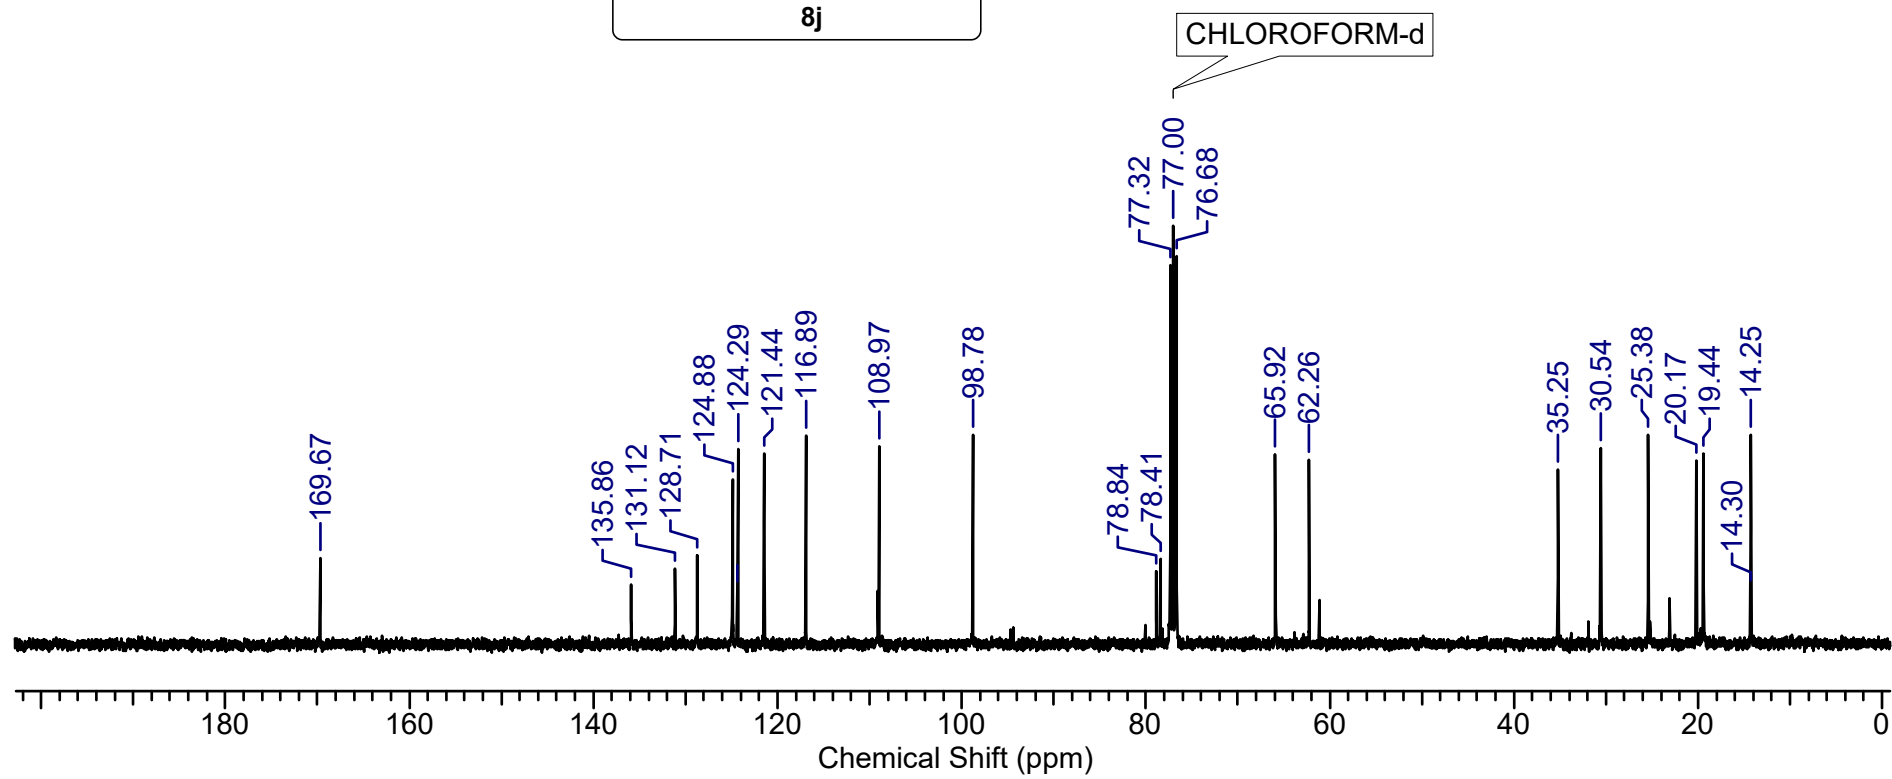

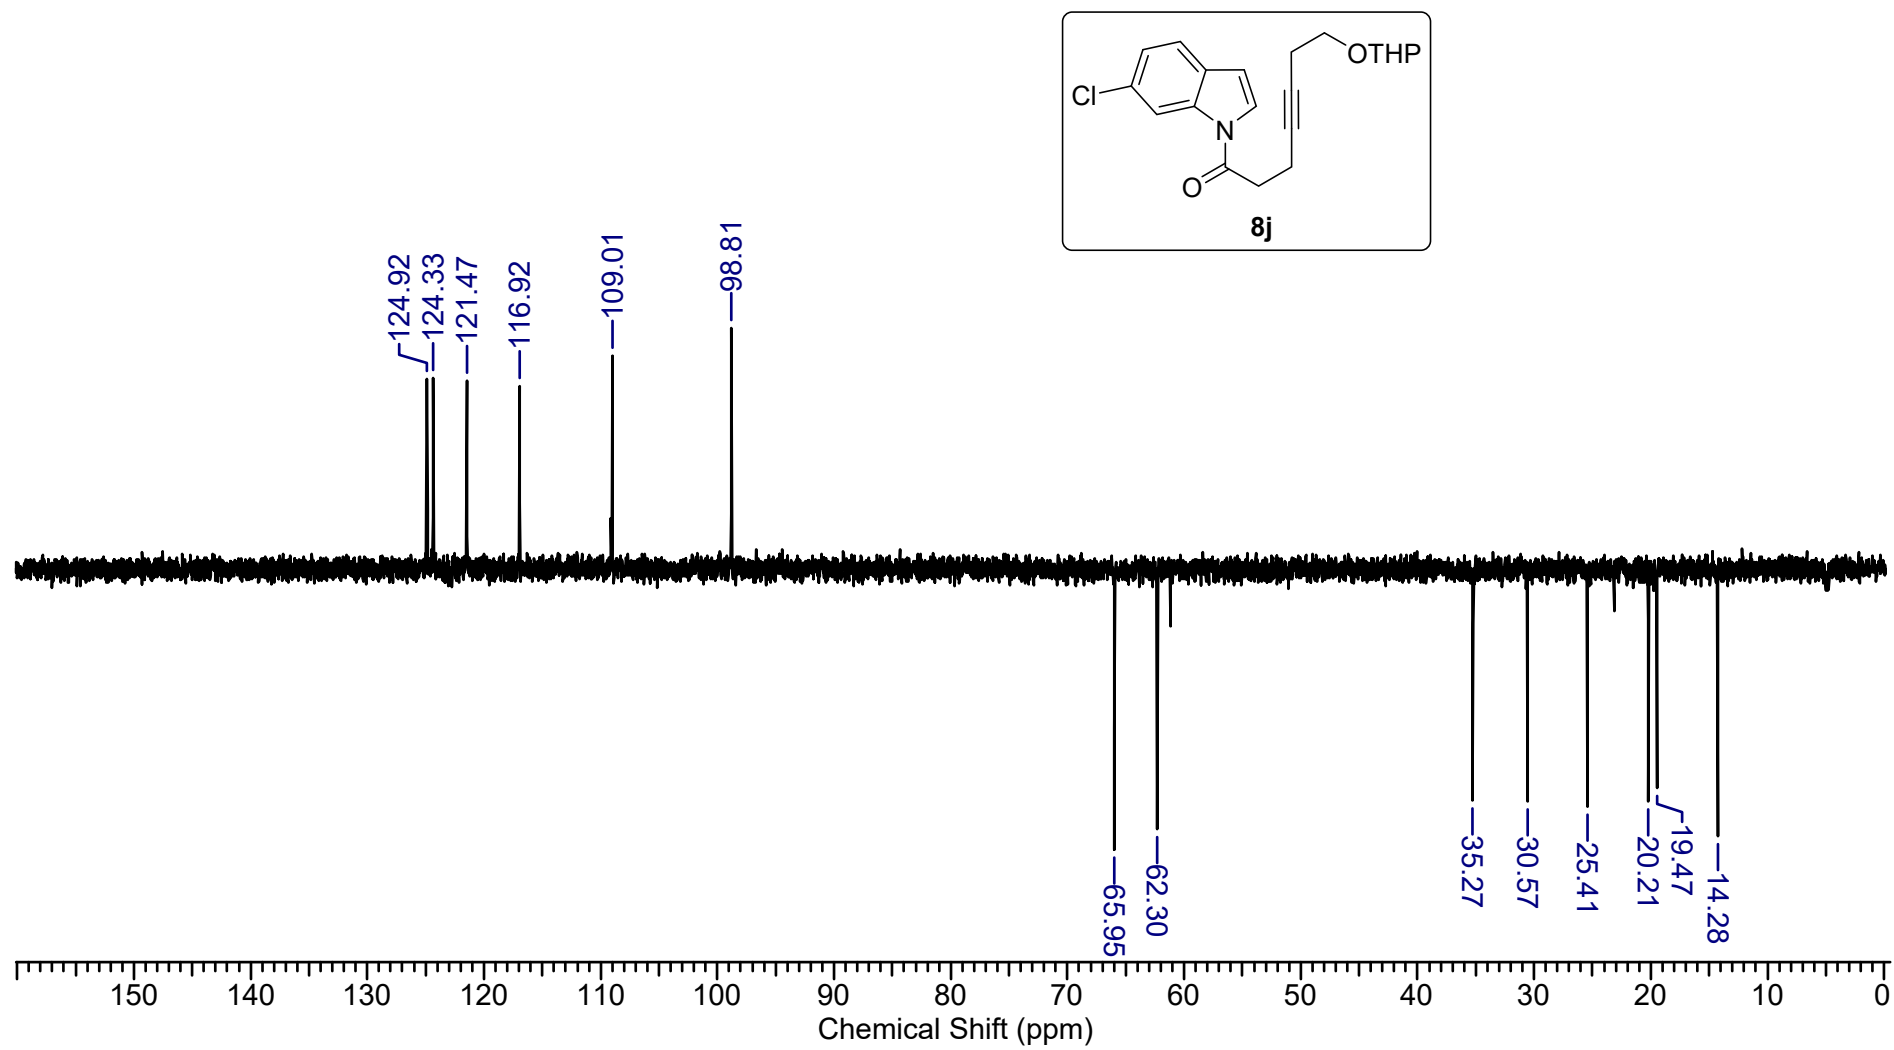

MSH-51 #337 RT: 1.83 AV: 1 NL: 6.15E8  
T: FTMS + p ESI Full ms [100.0000-1500.0000]

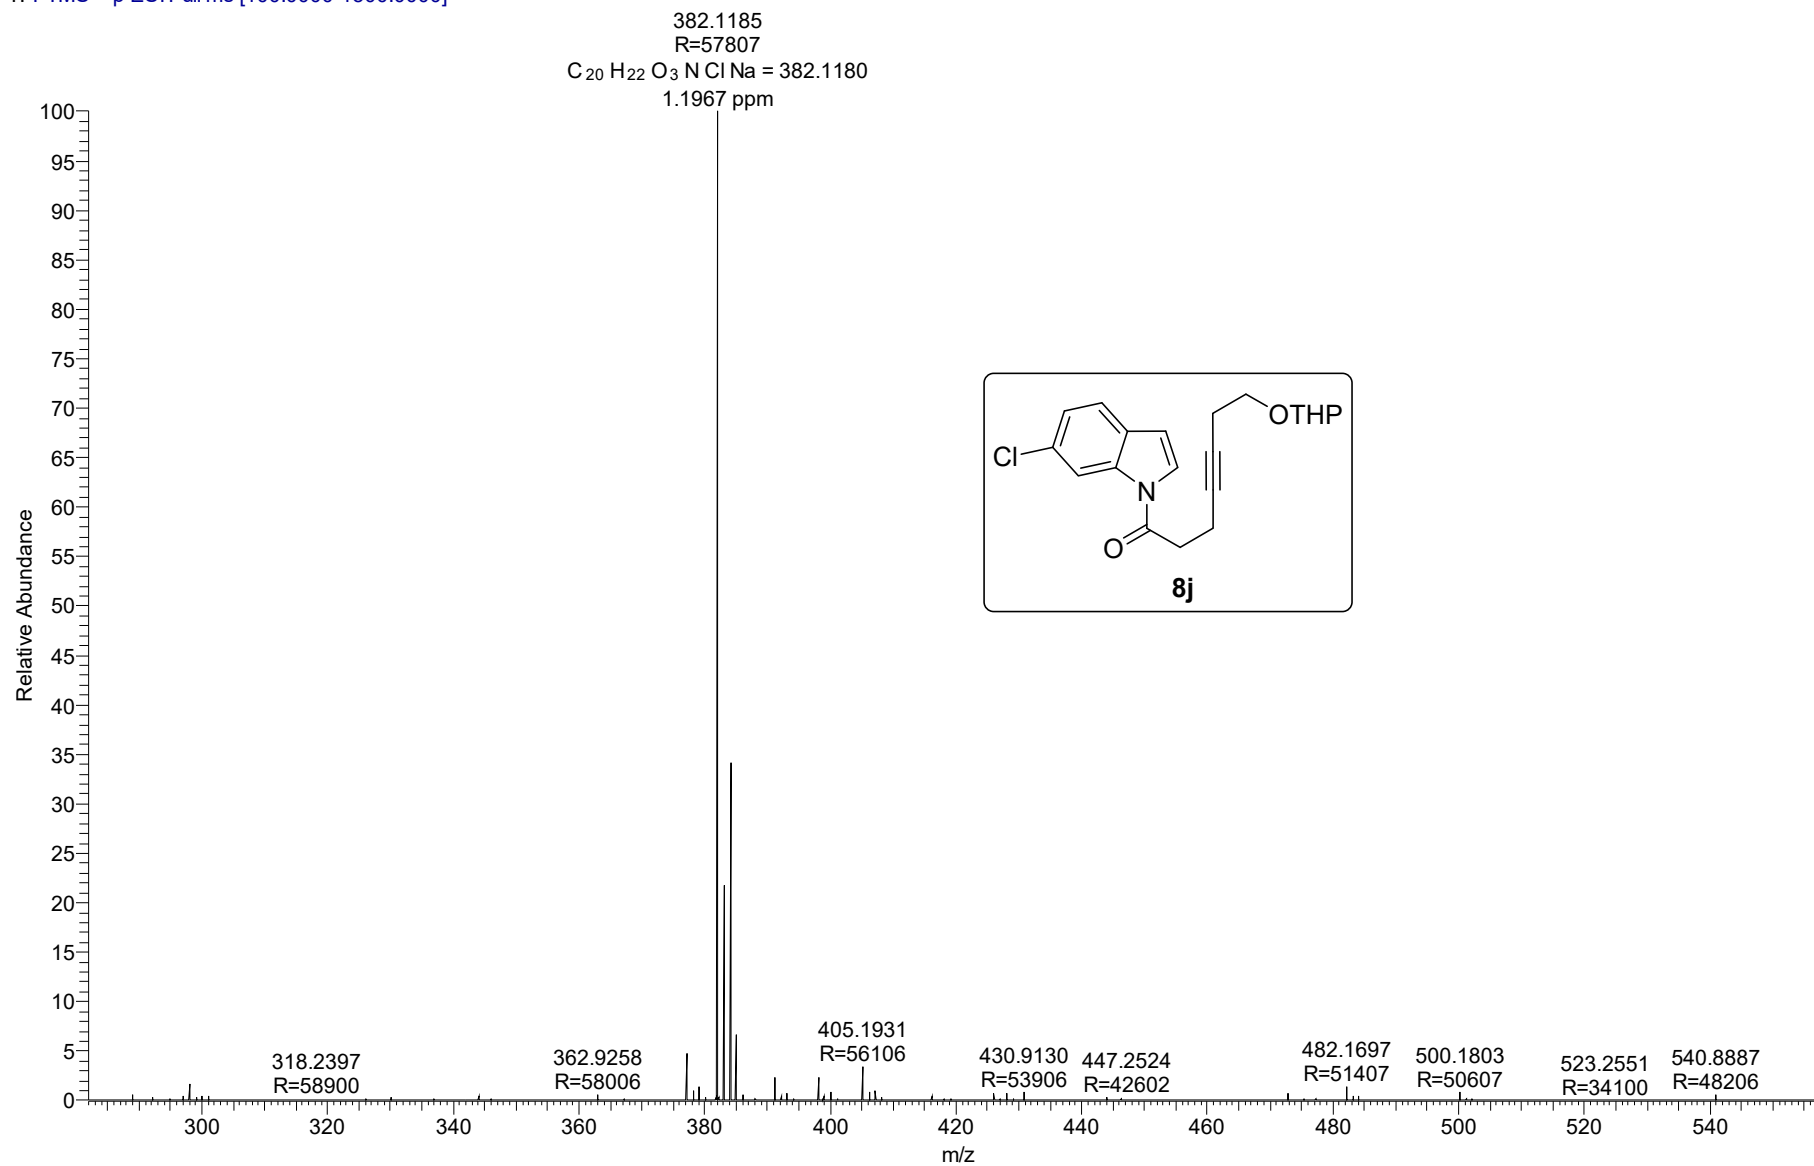

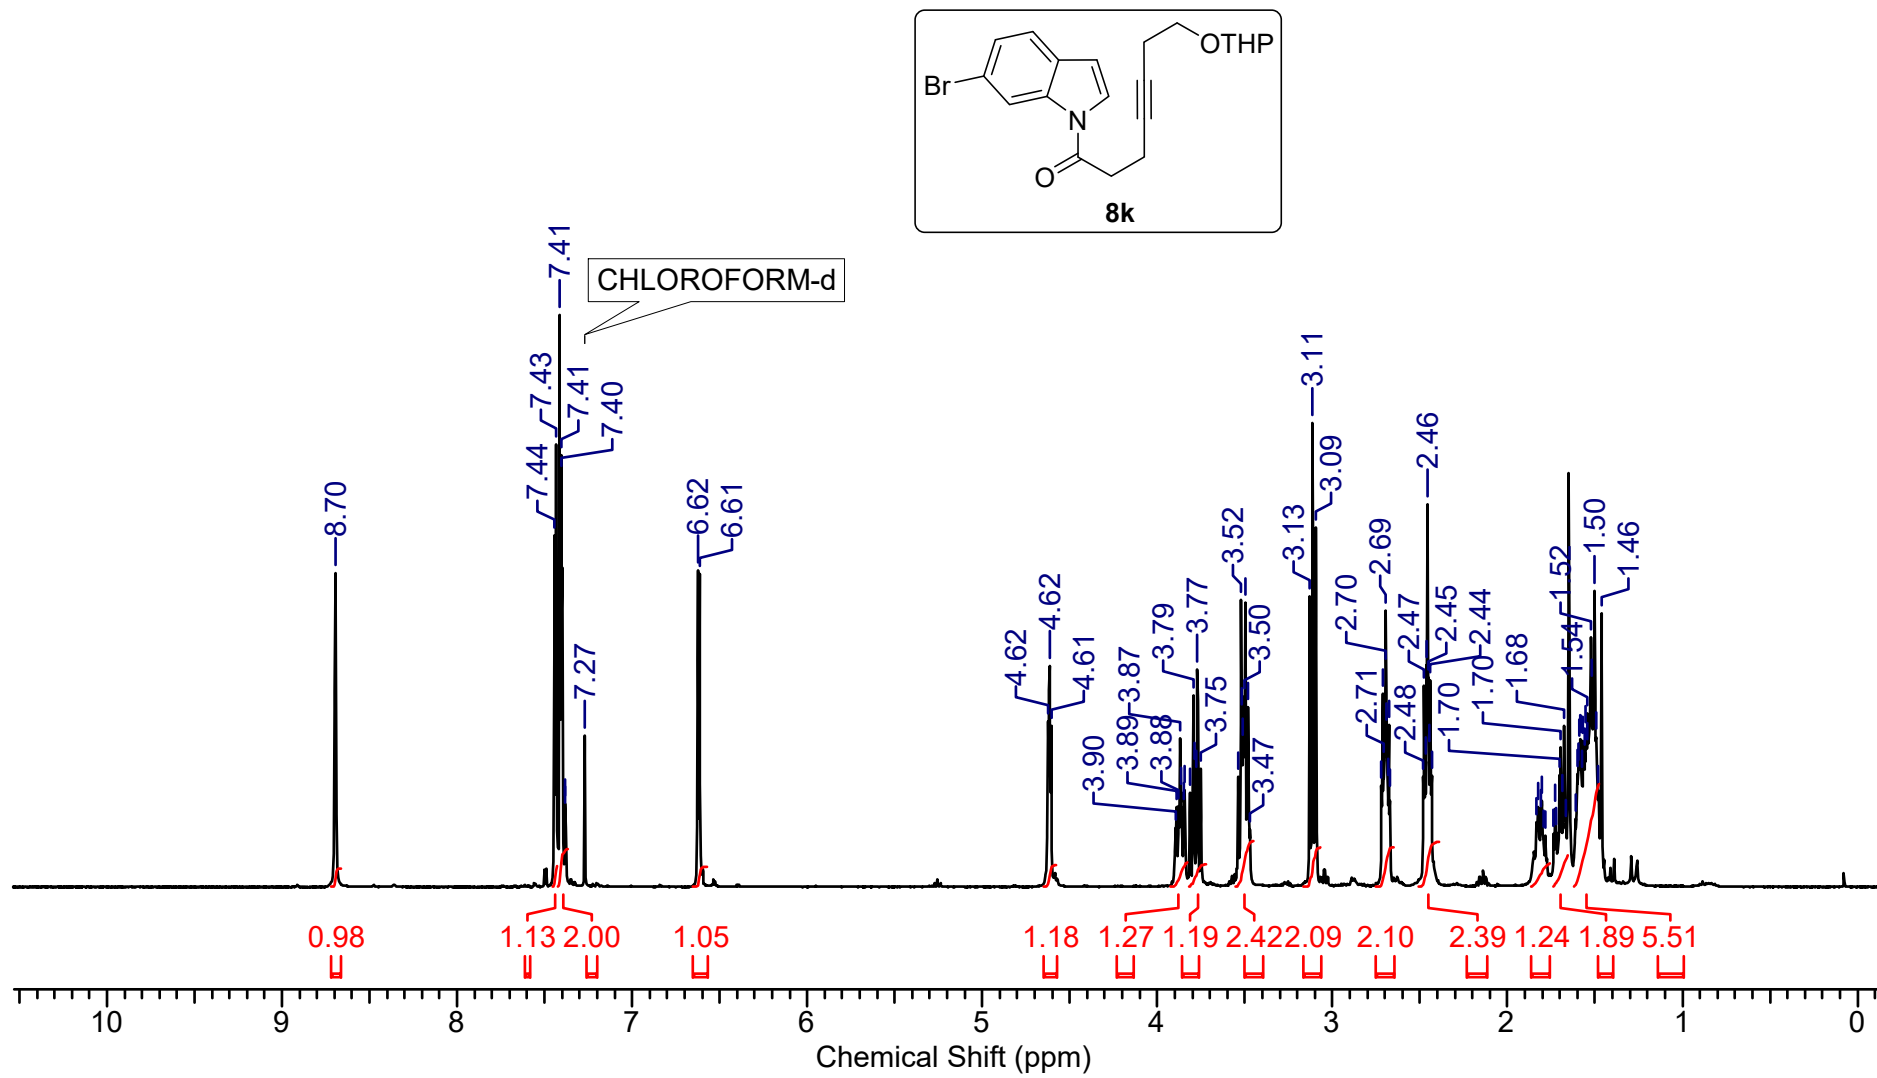

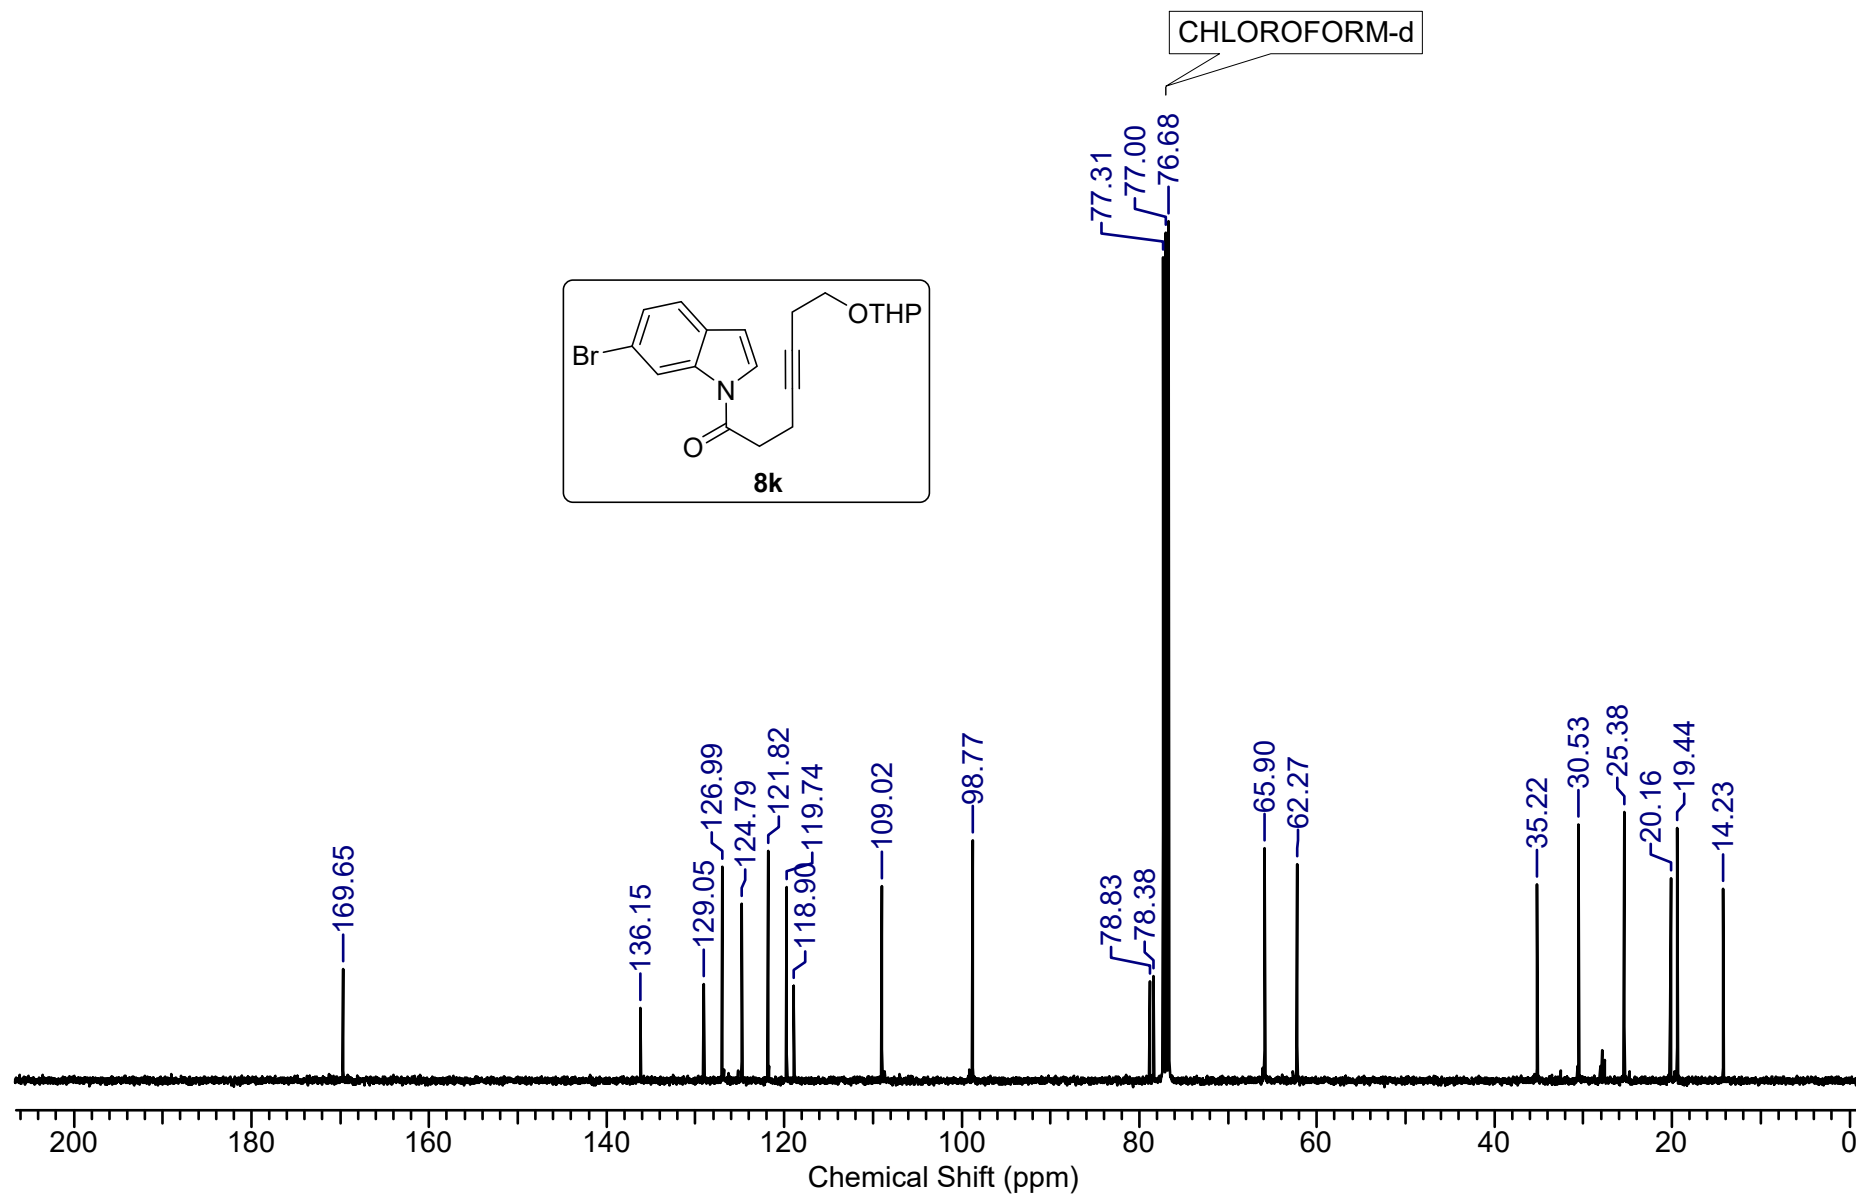

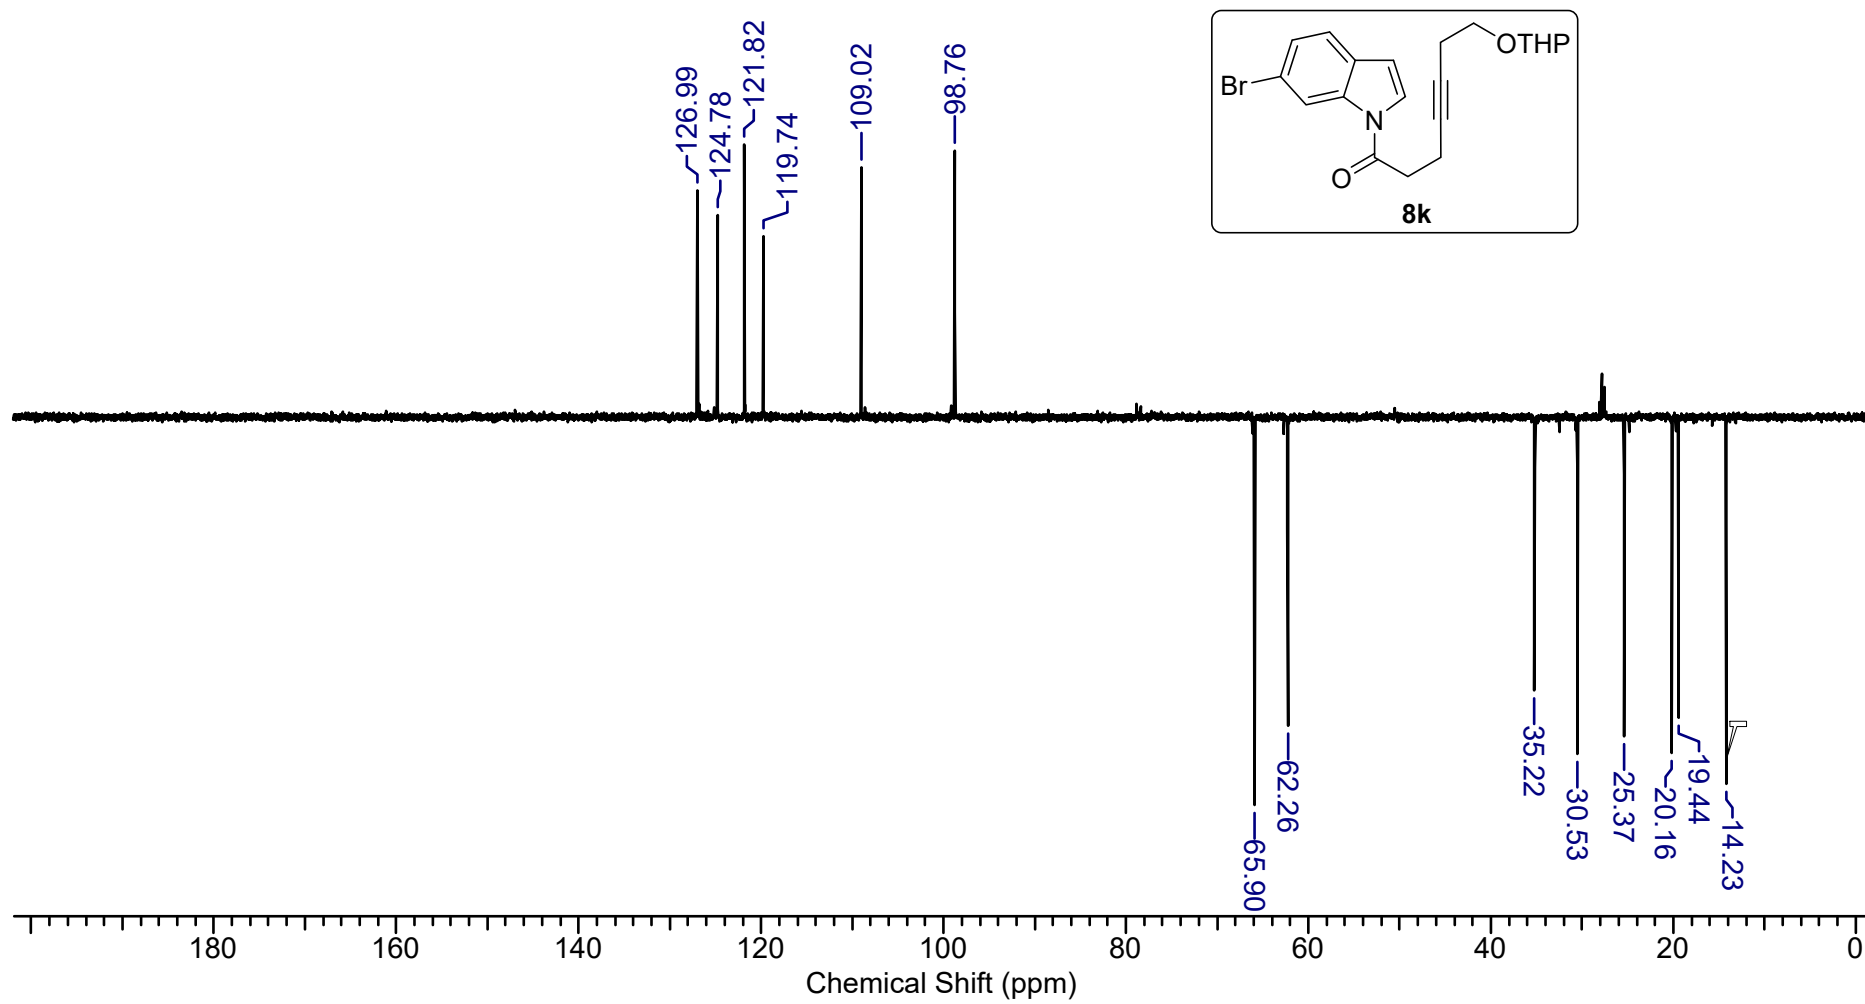



MSH-6a #329 RT: 1.79 AV: 1 NL: 9.79E7  
T: FTMS + p ESIFull ms [100.0000-1500.0000]

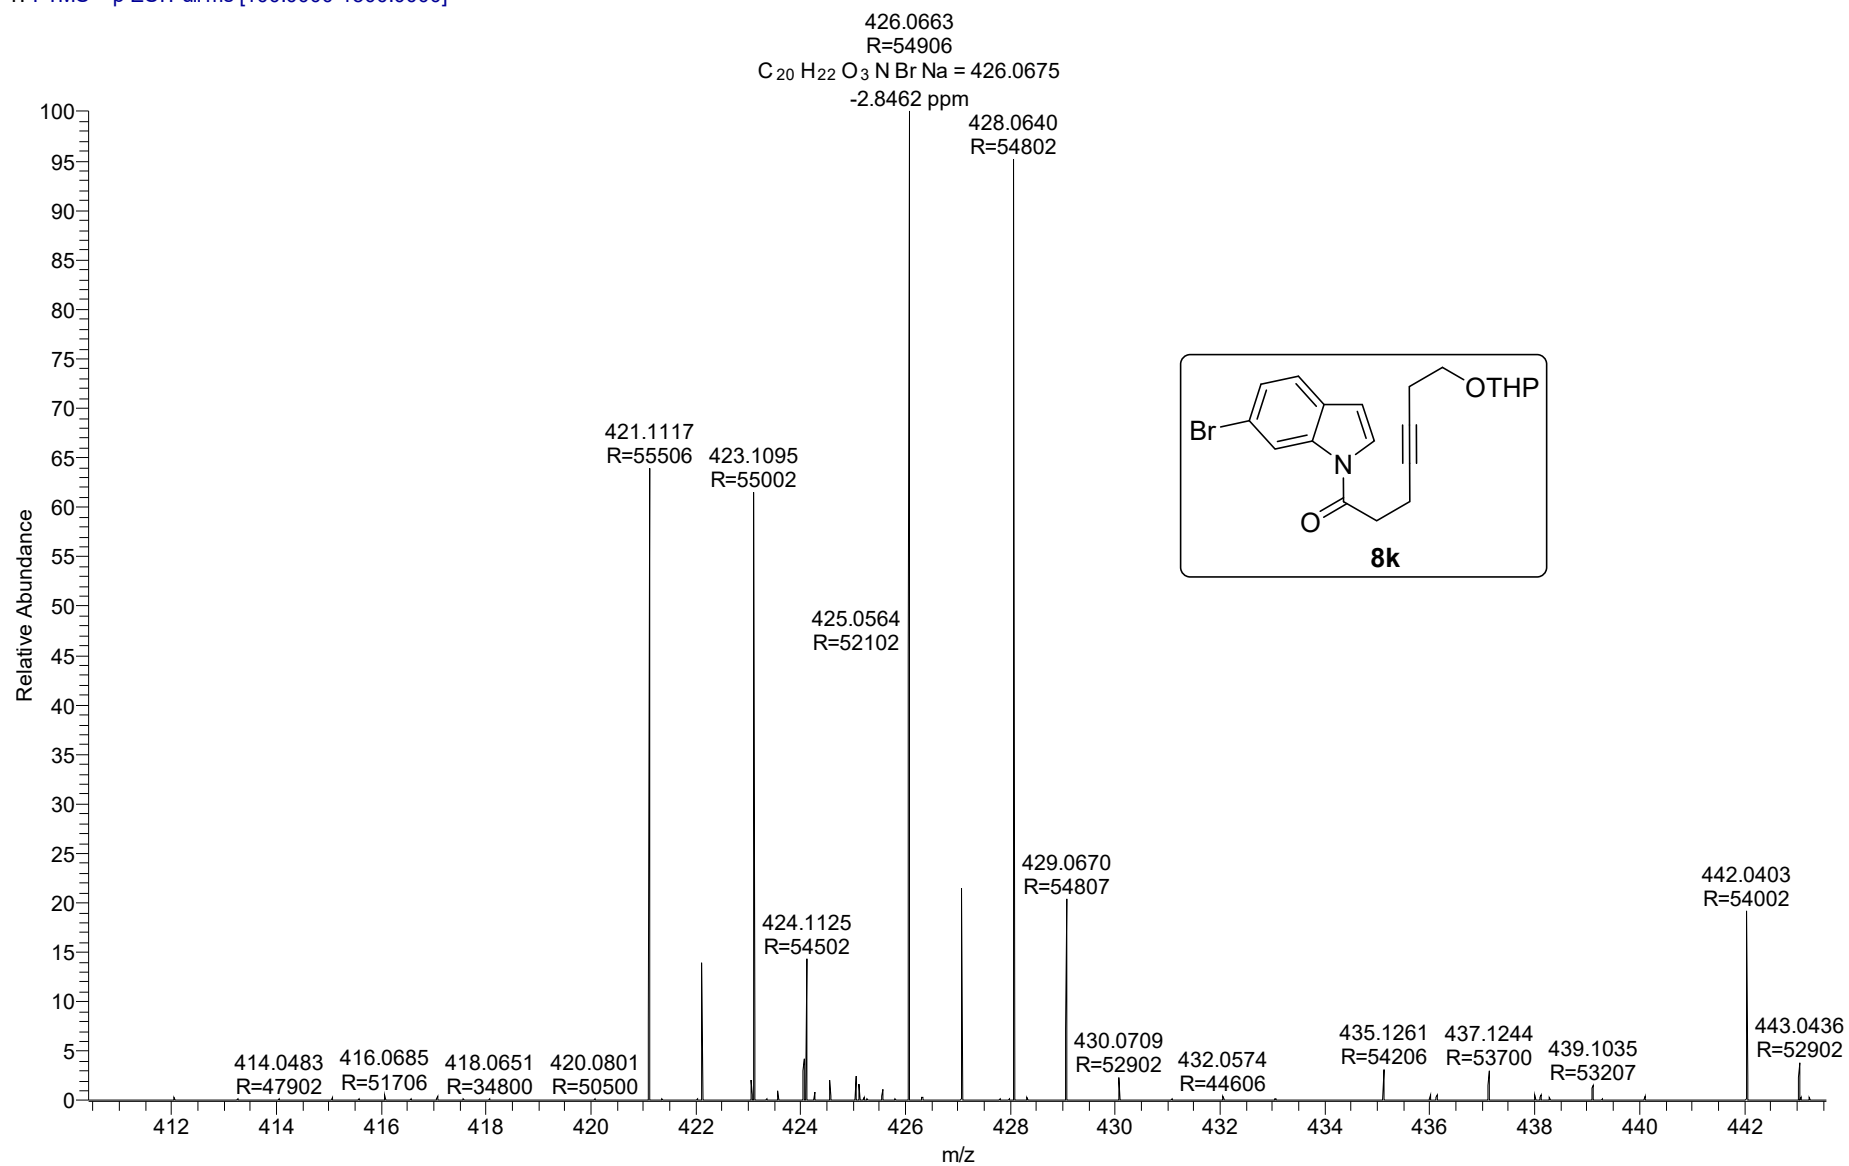

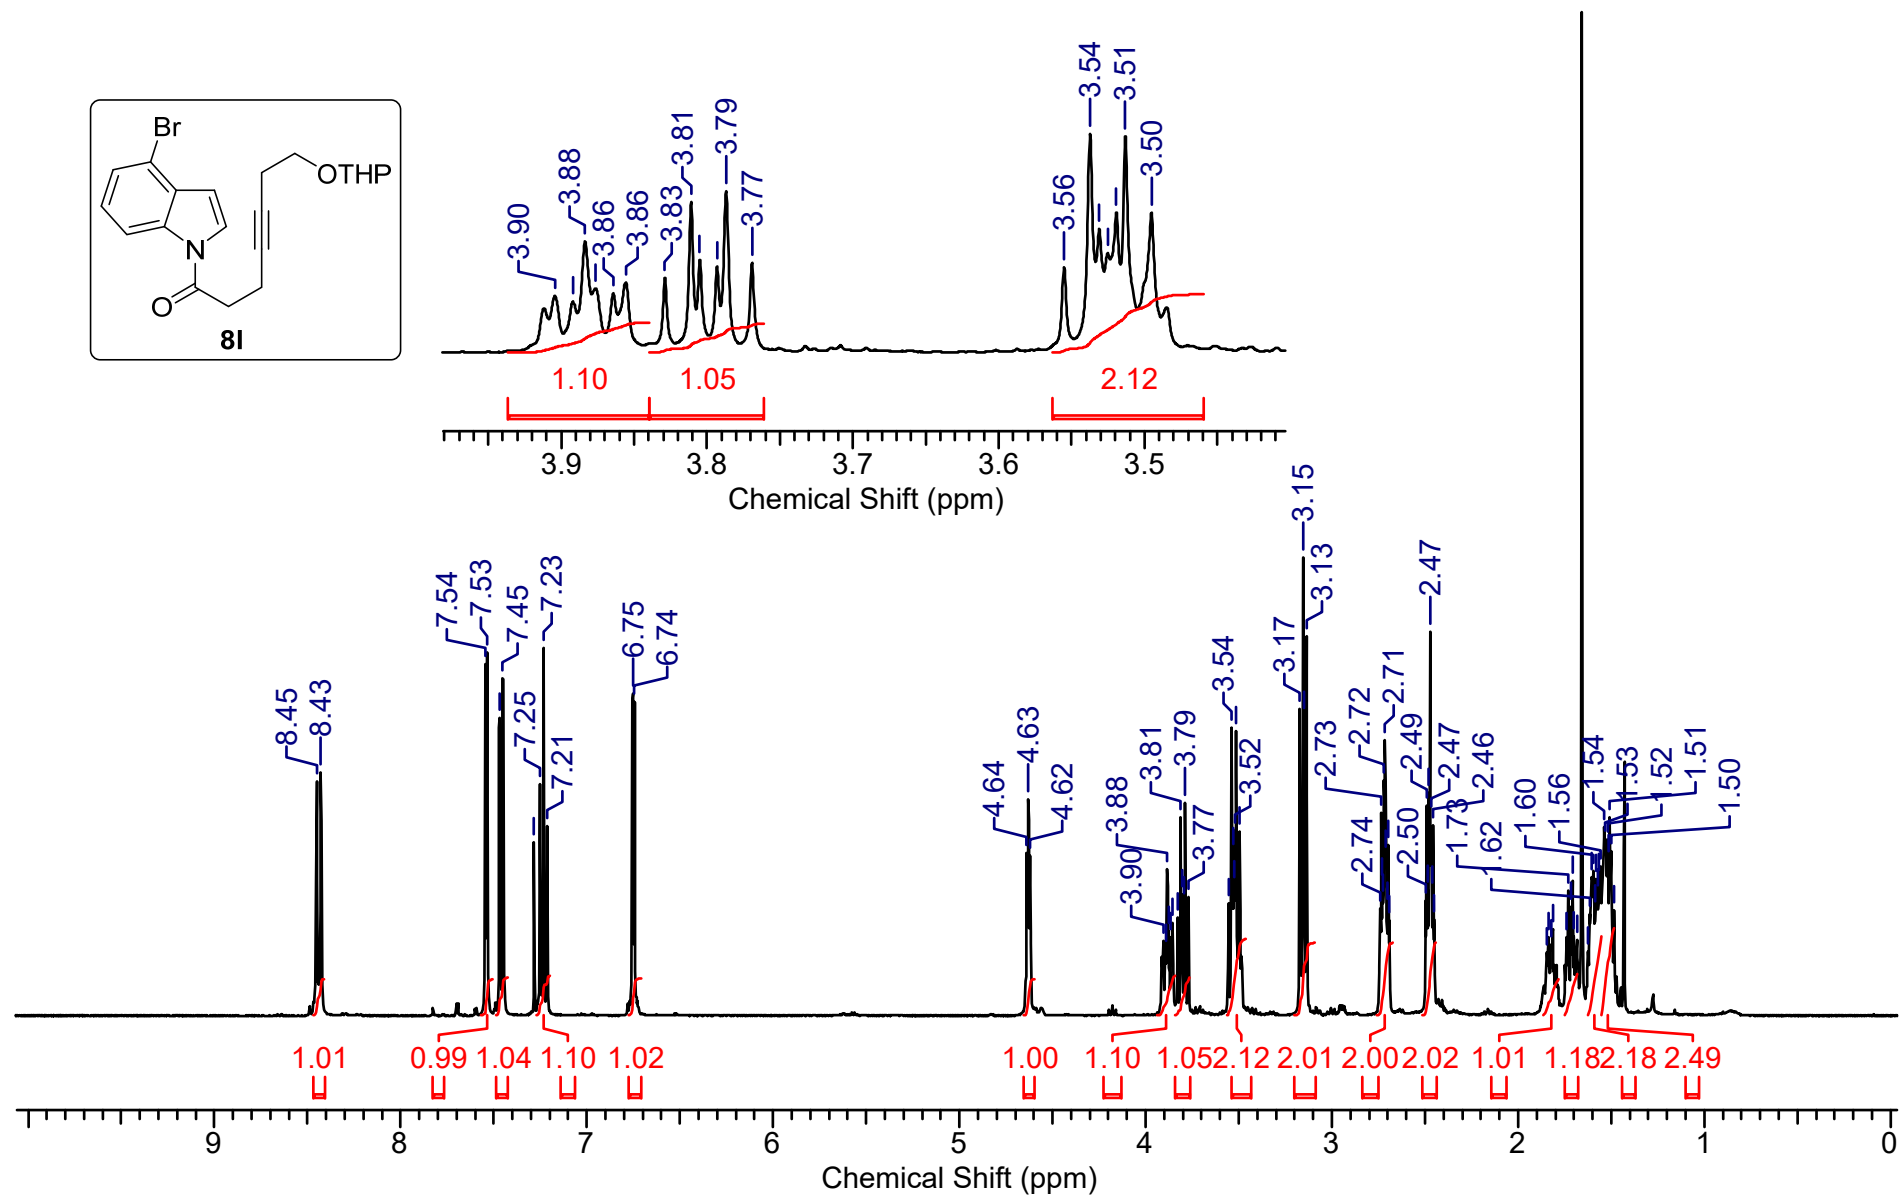

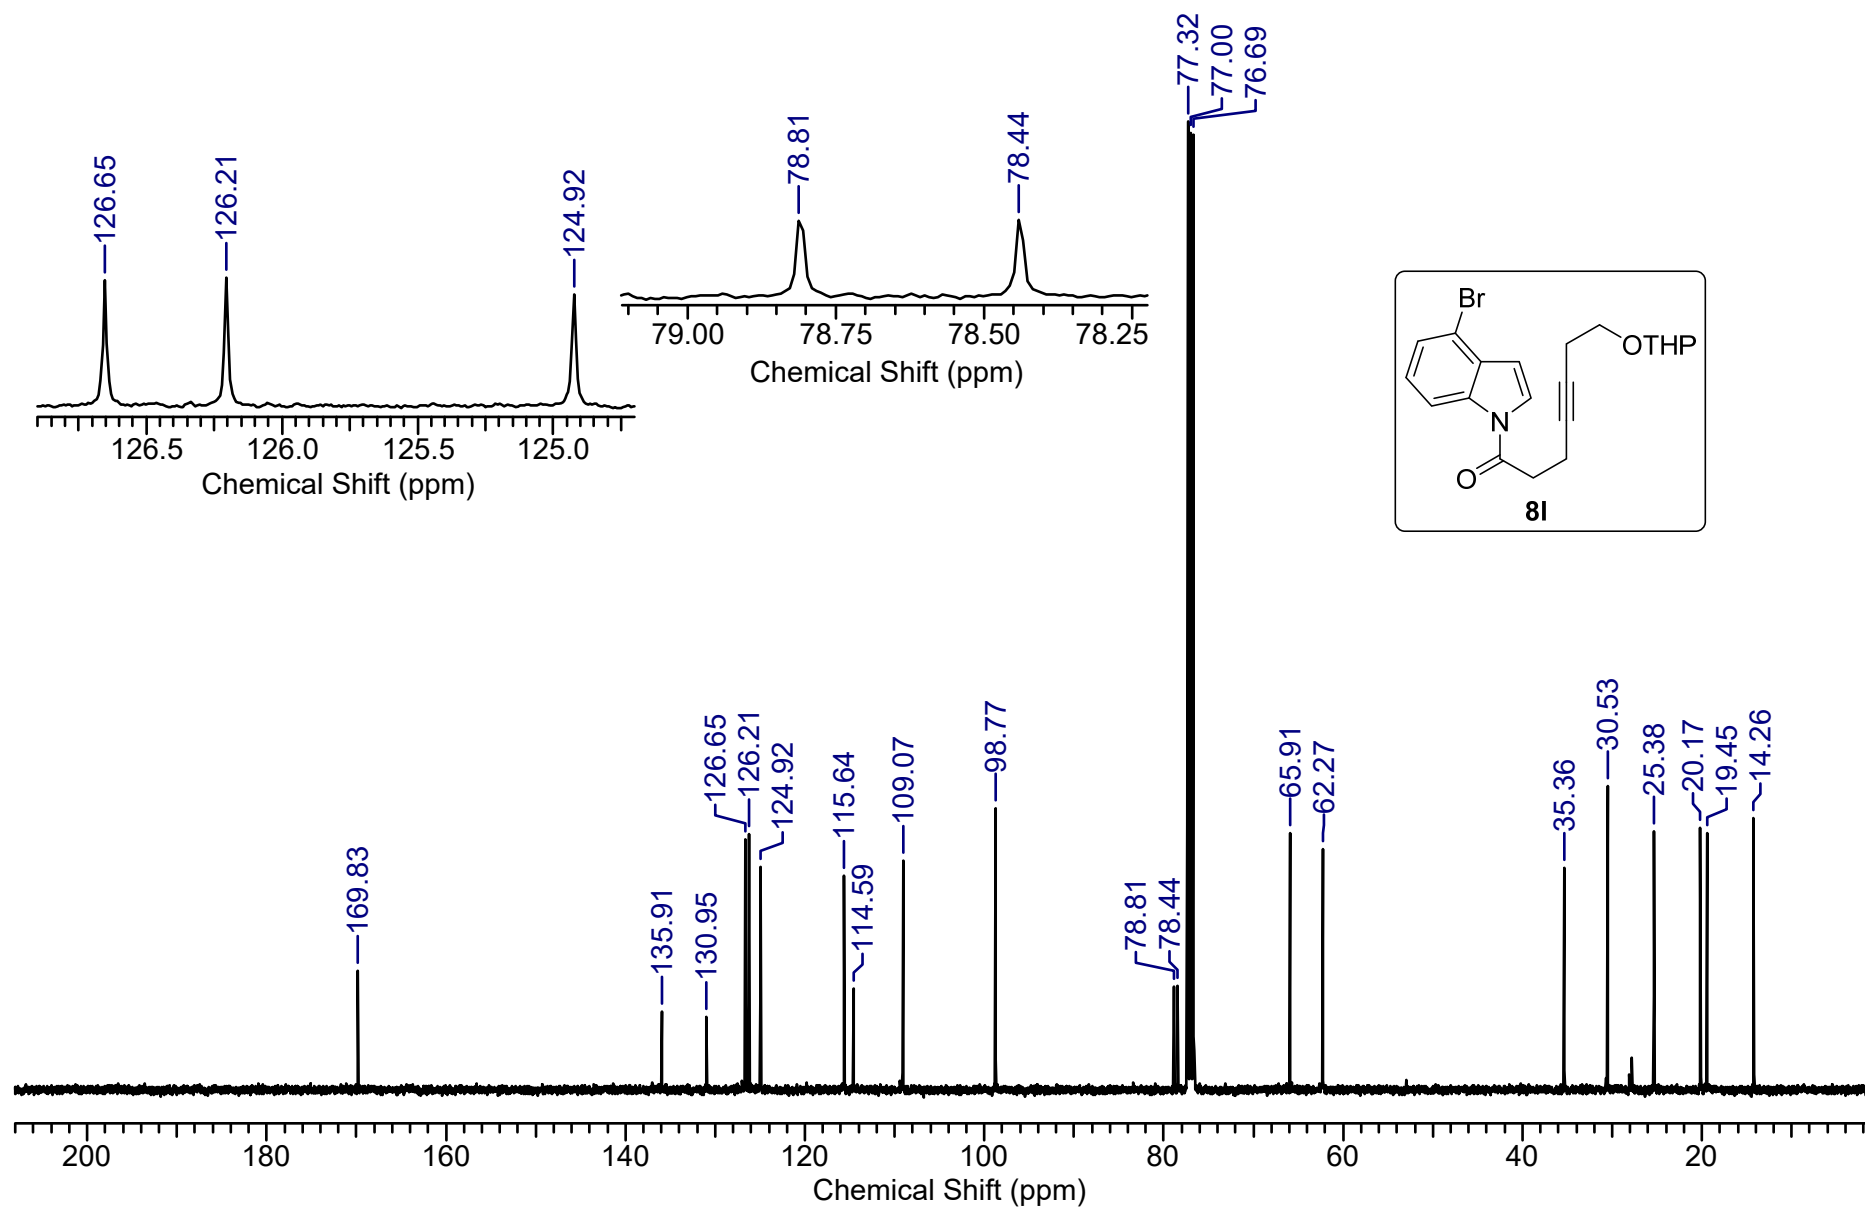

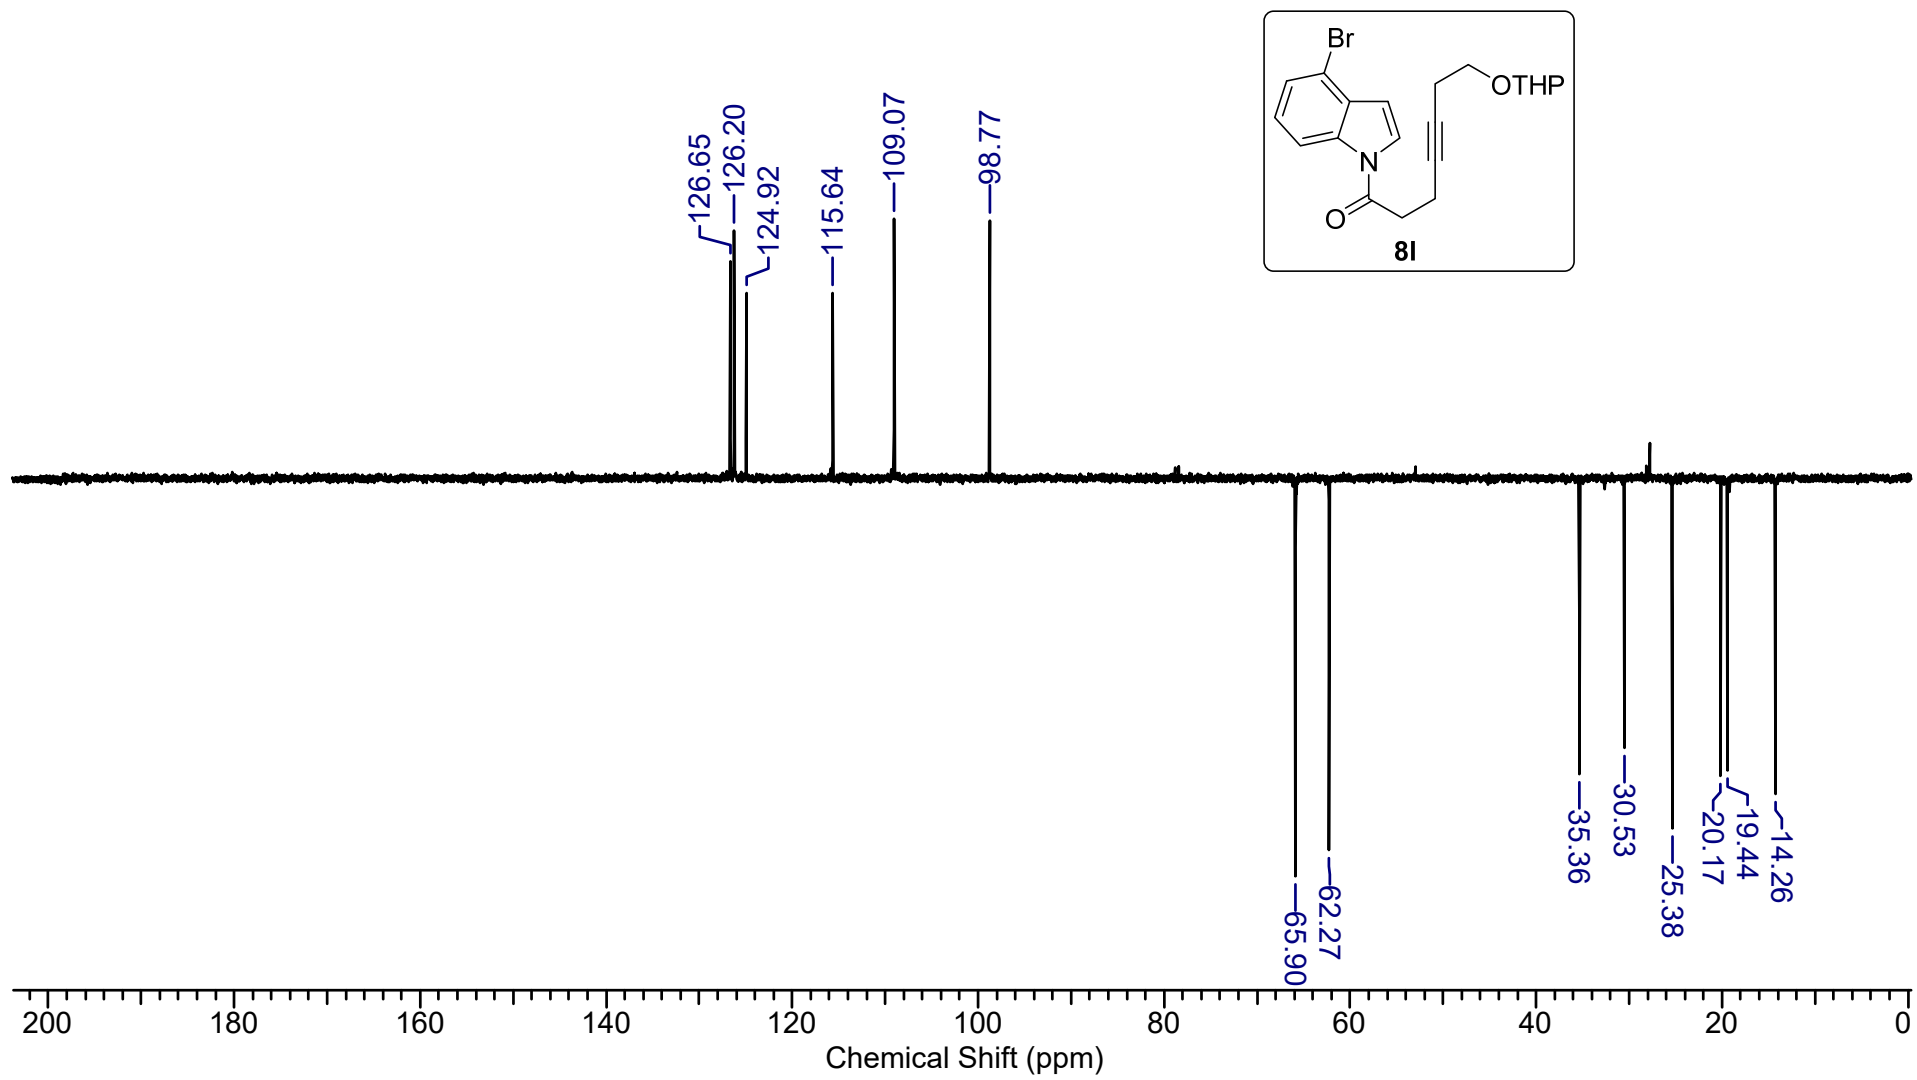

MSH-11 #352 RT: 1.90 AV: 1 NL: 2.06E7  
T: FTMS + p ESI Full ms [100.0000-1500.0000]

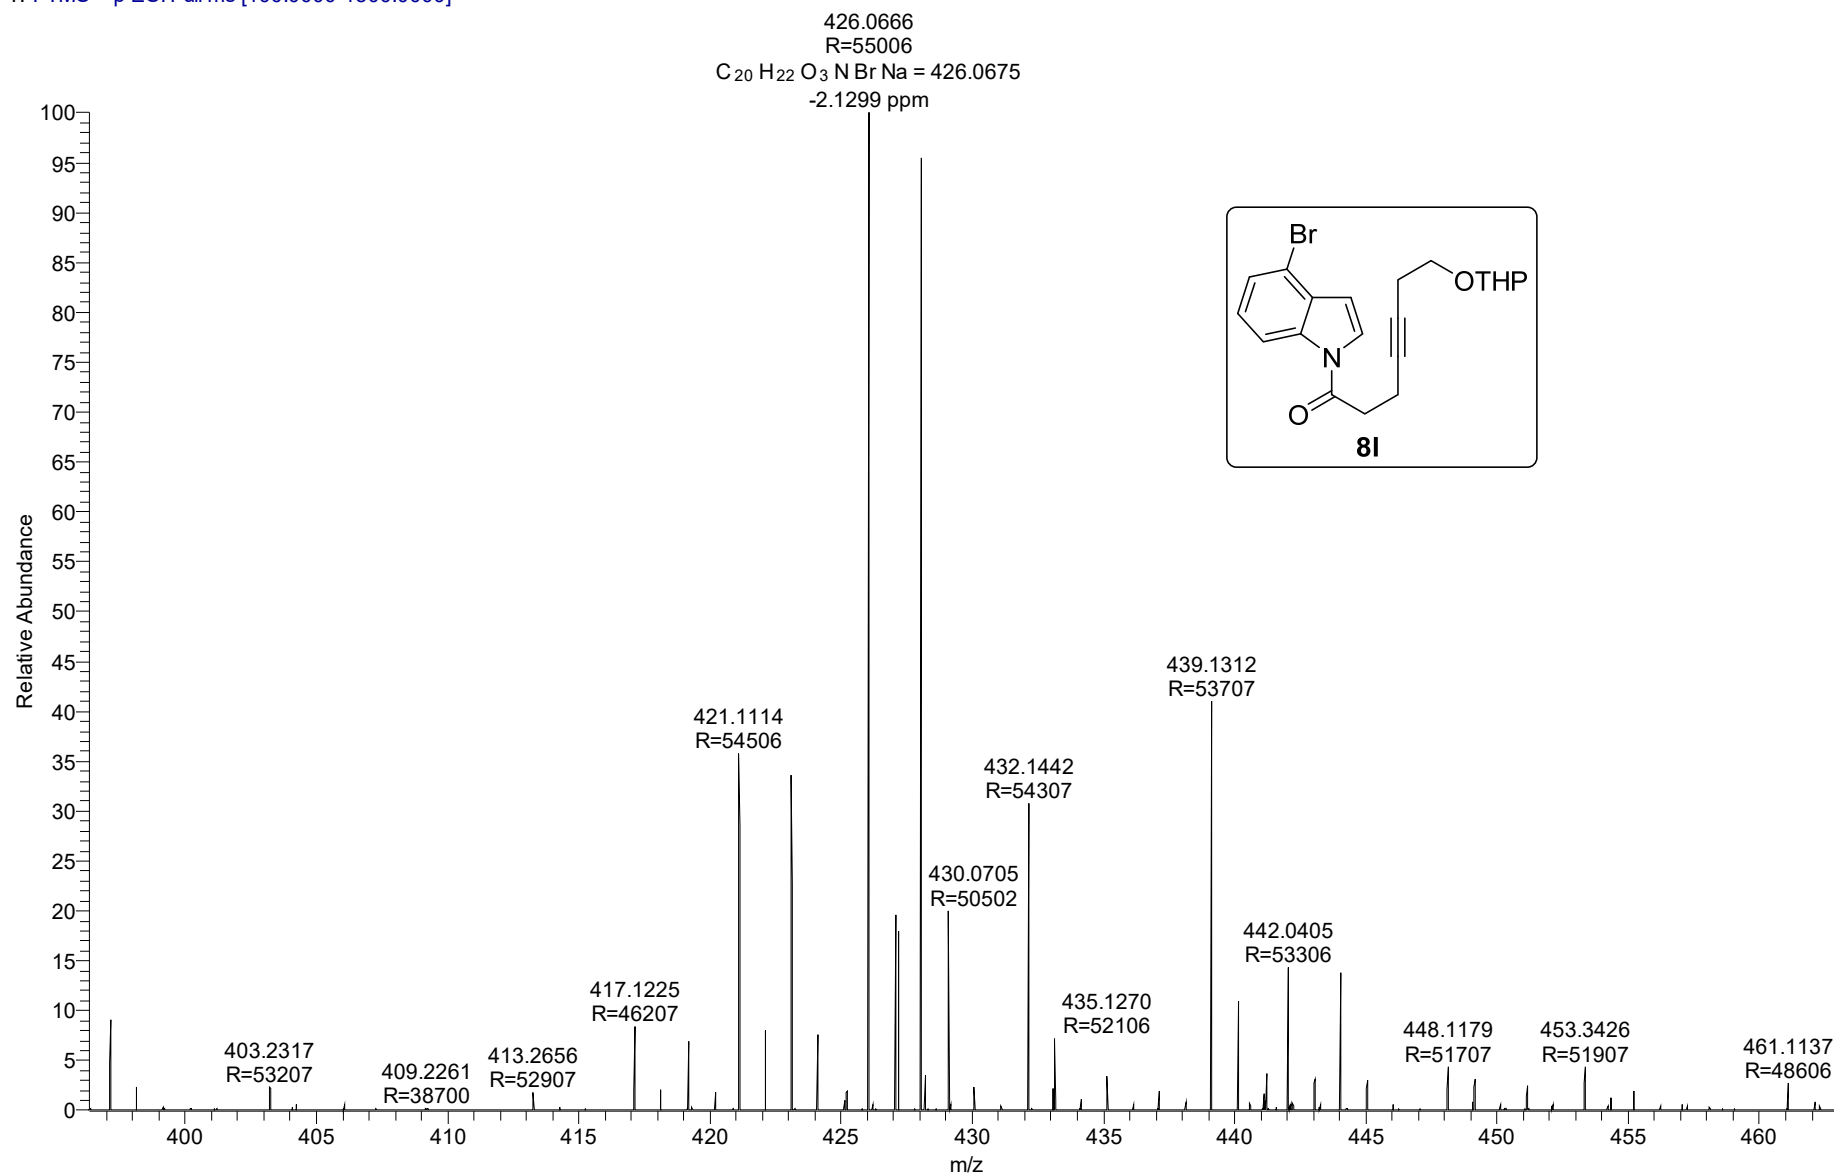

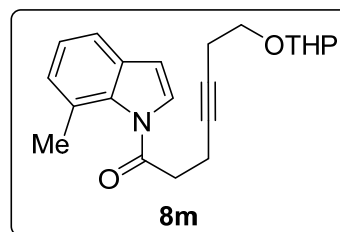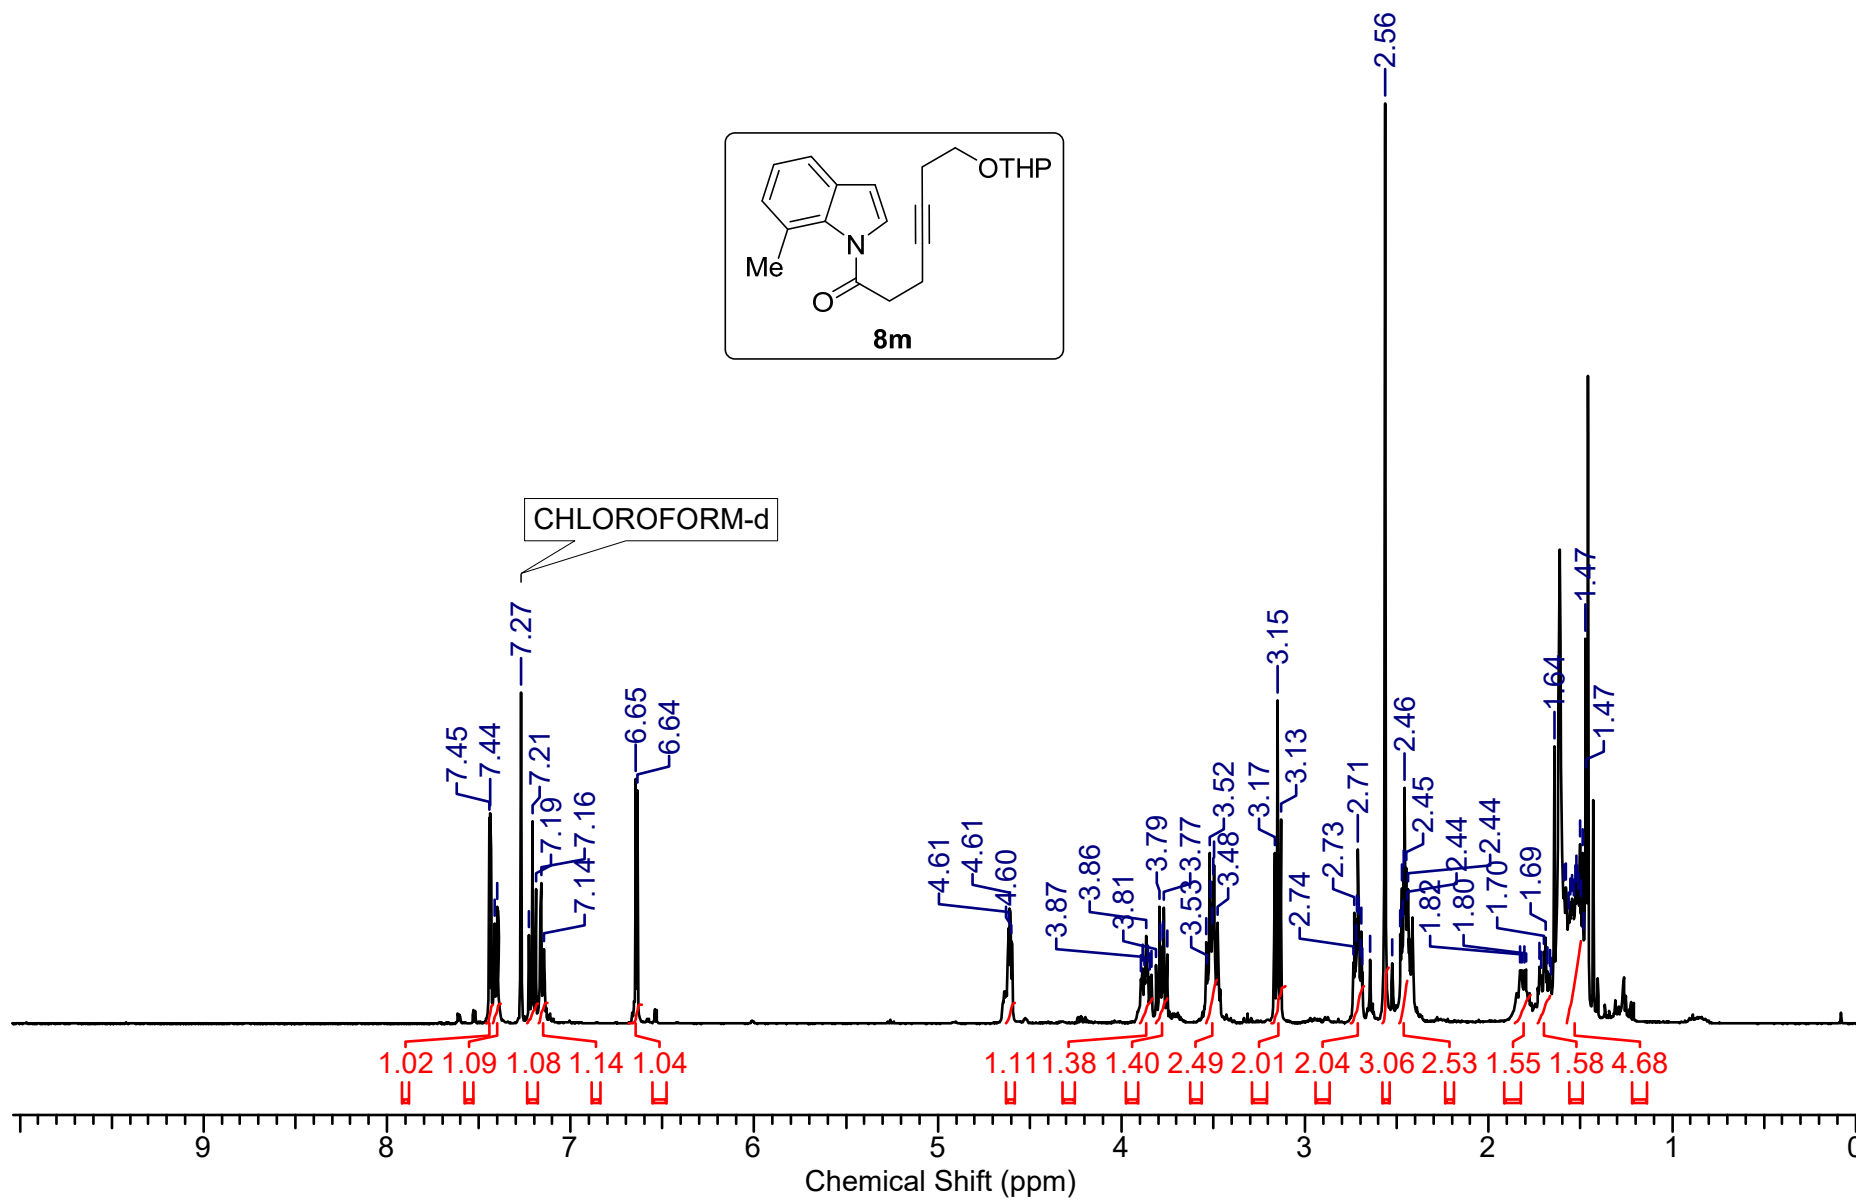

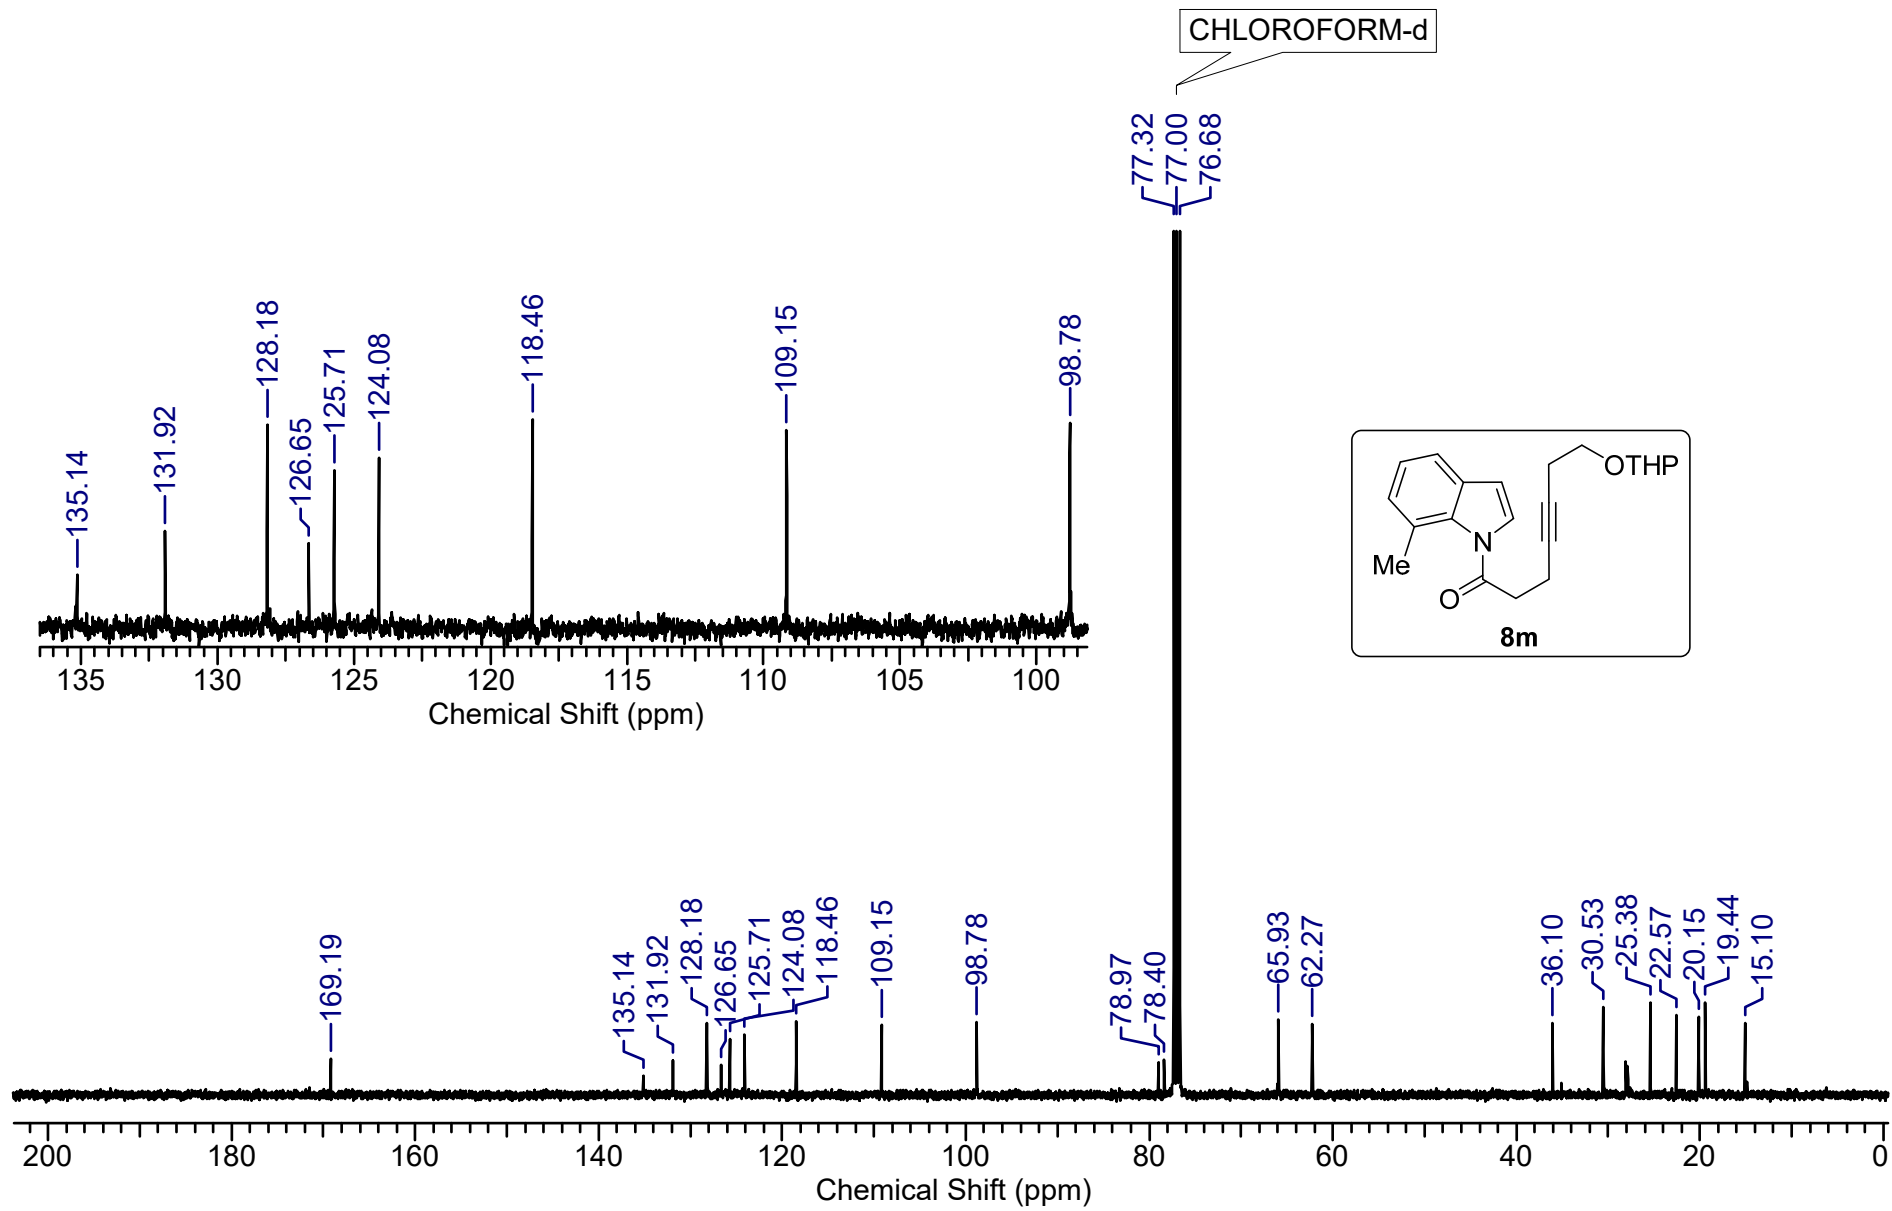

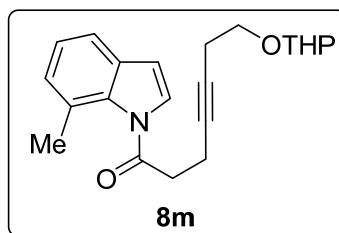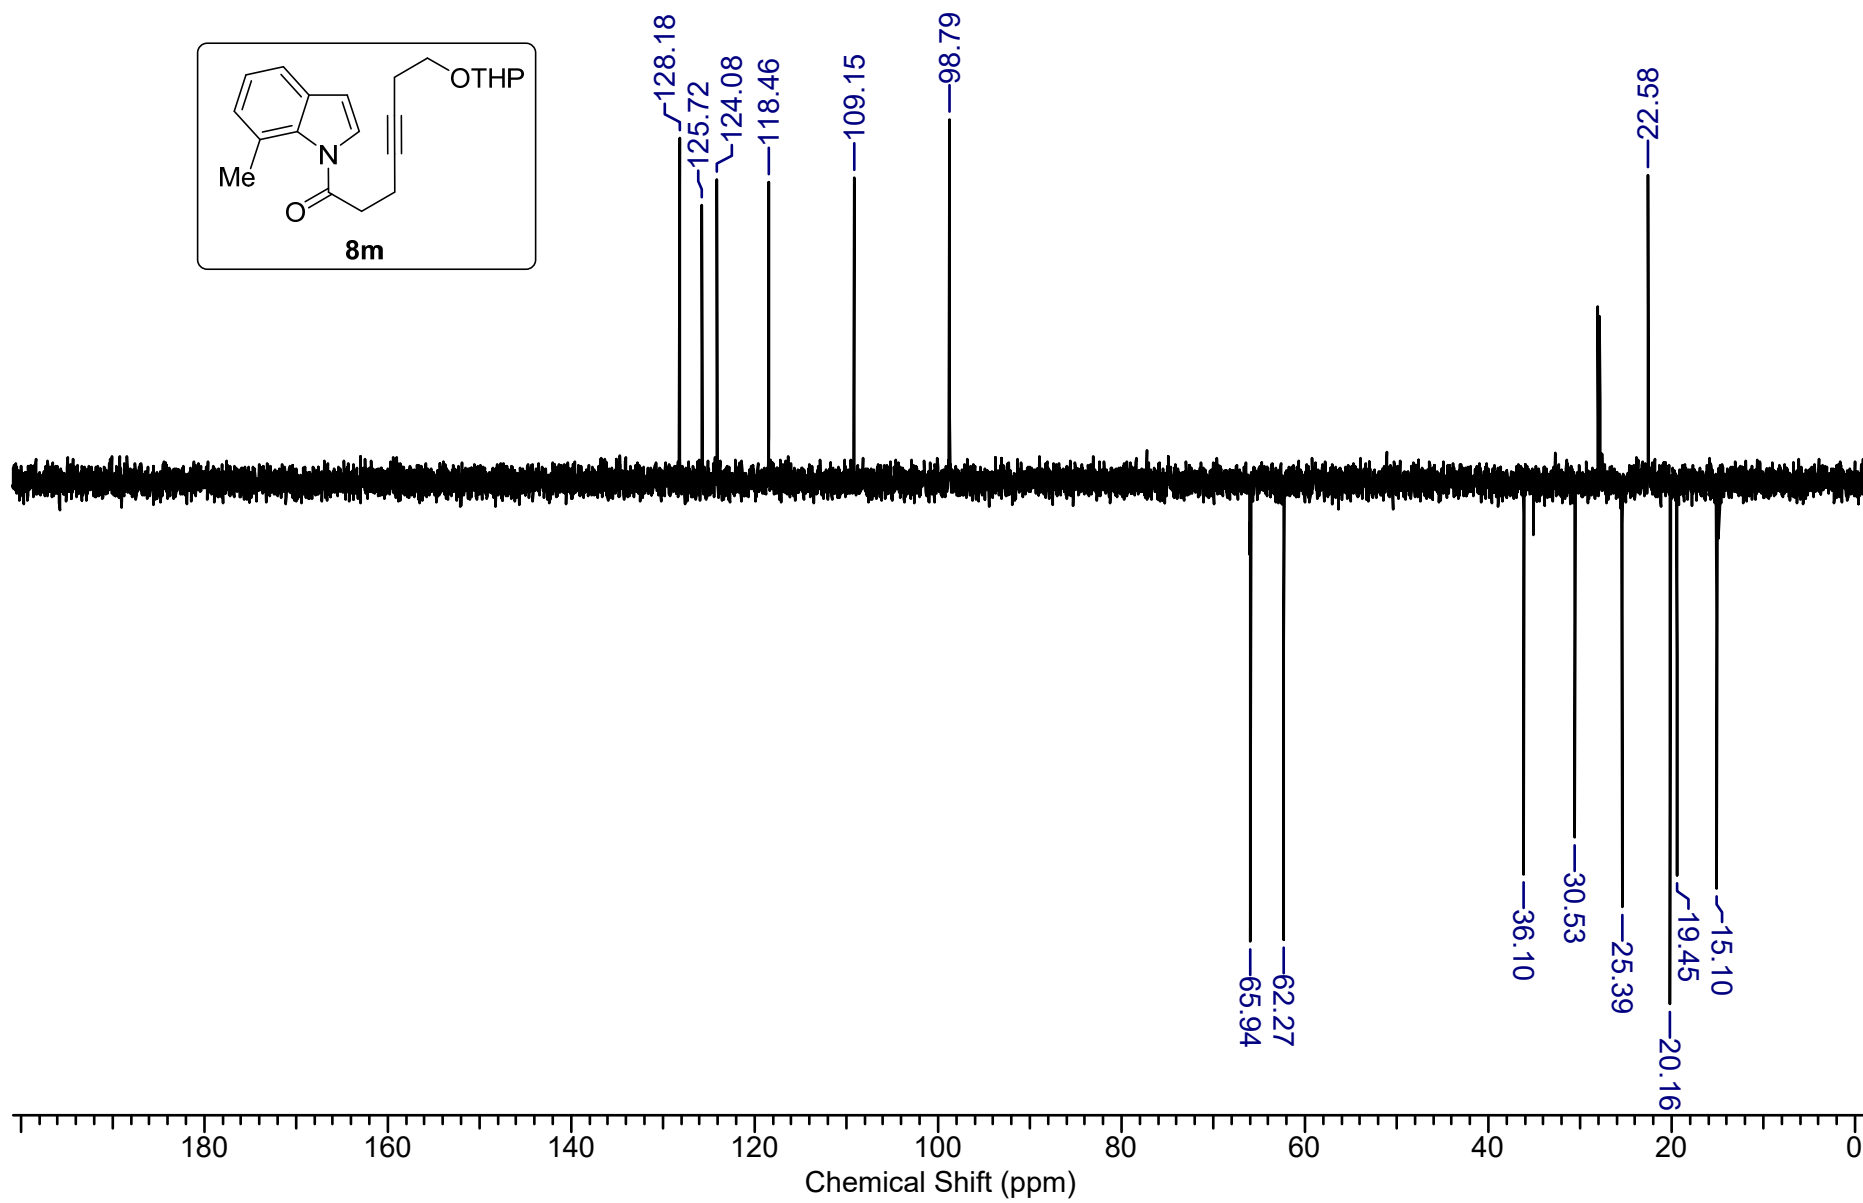



MSH-33 #347 RT: 1.88 AV: 1 NL: 2.80E8  
T: FTMS + p ESI Full ms [100.0000-1500.0000]

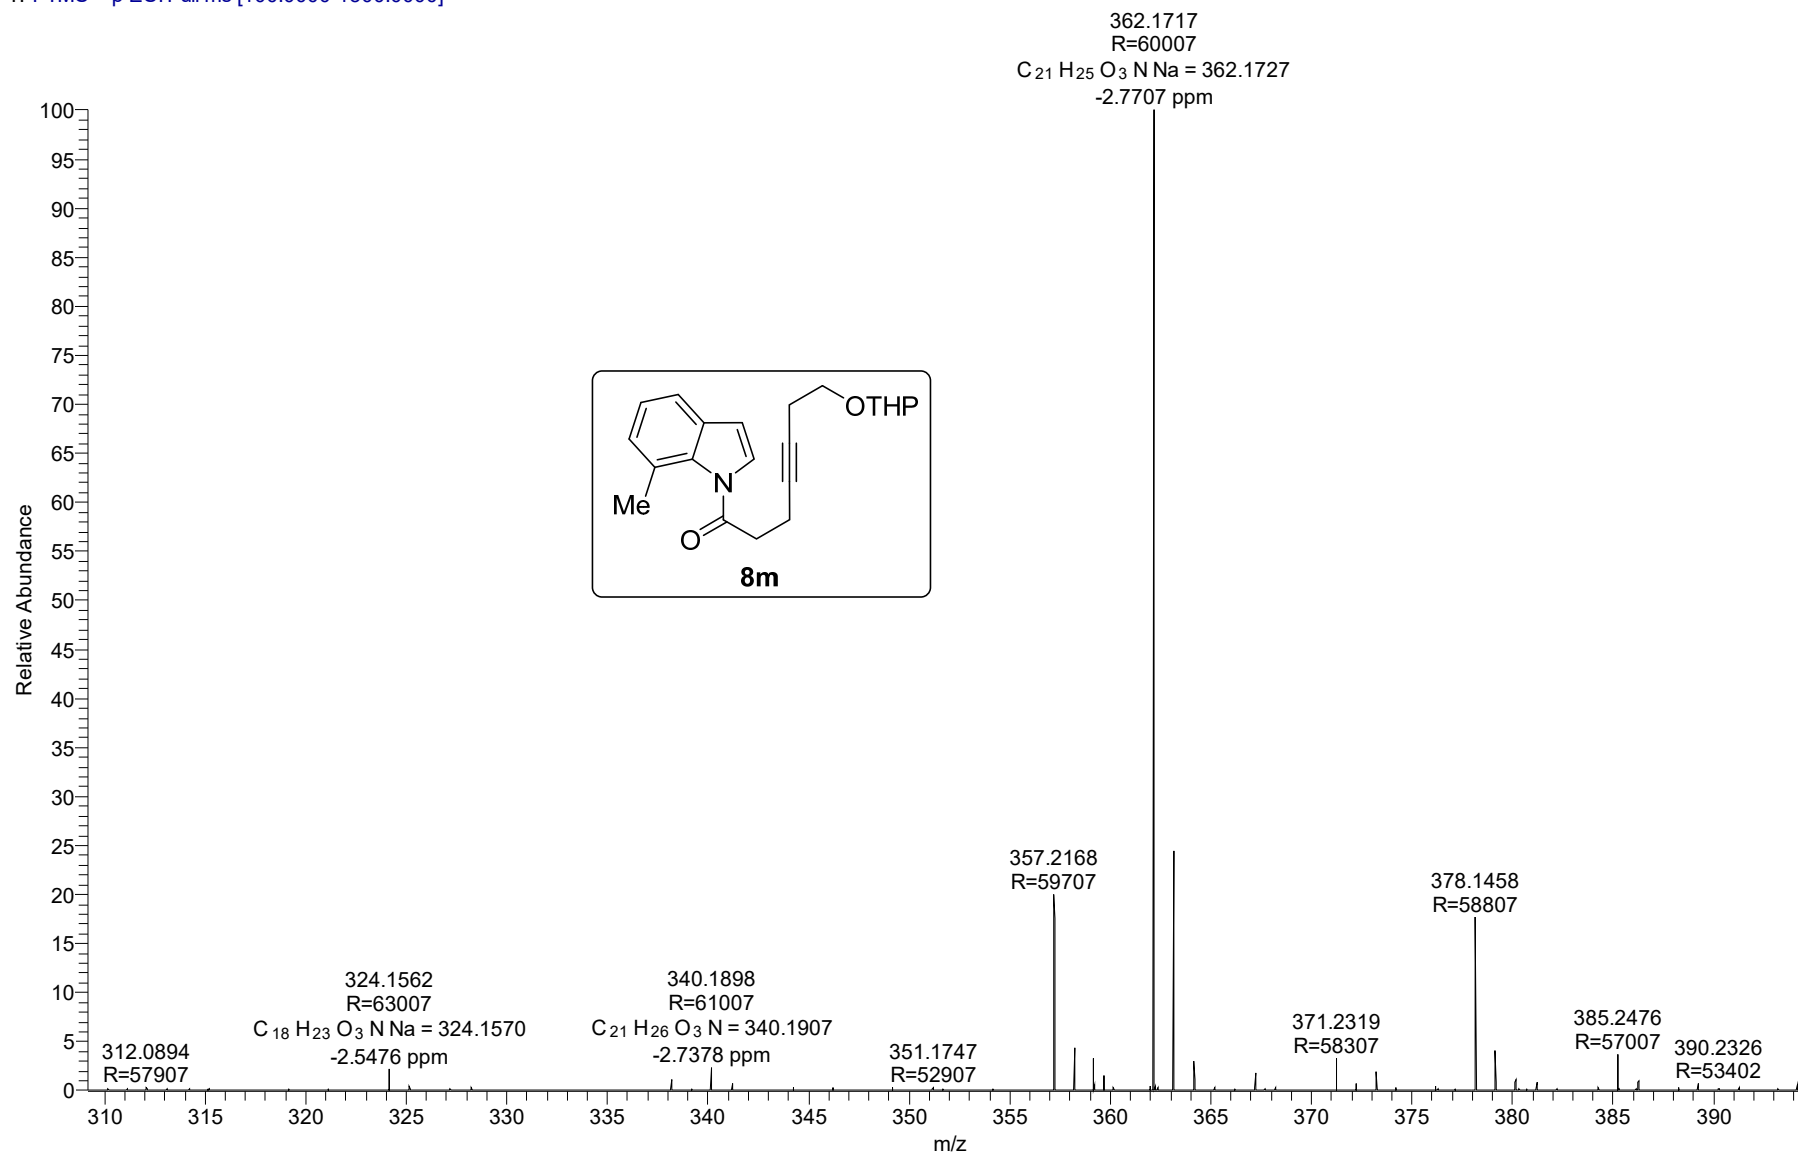

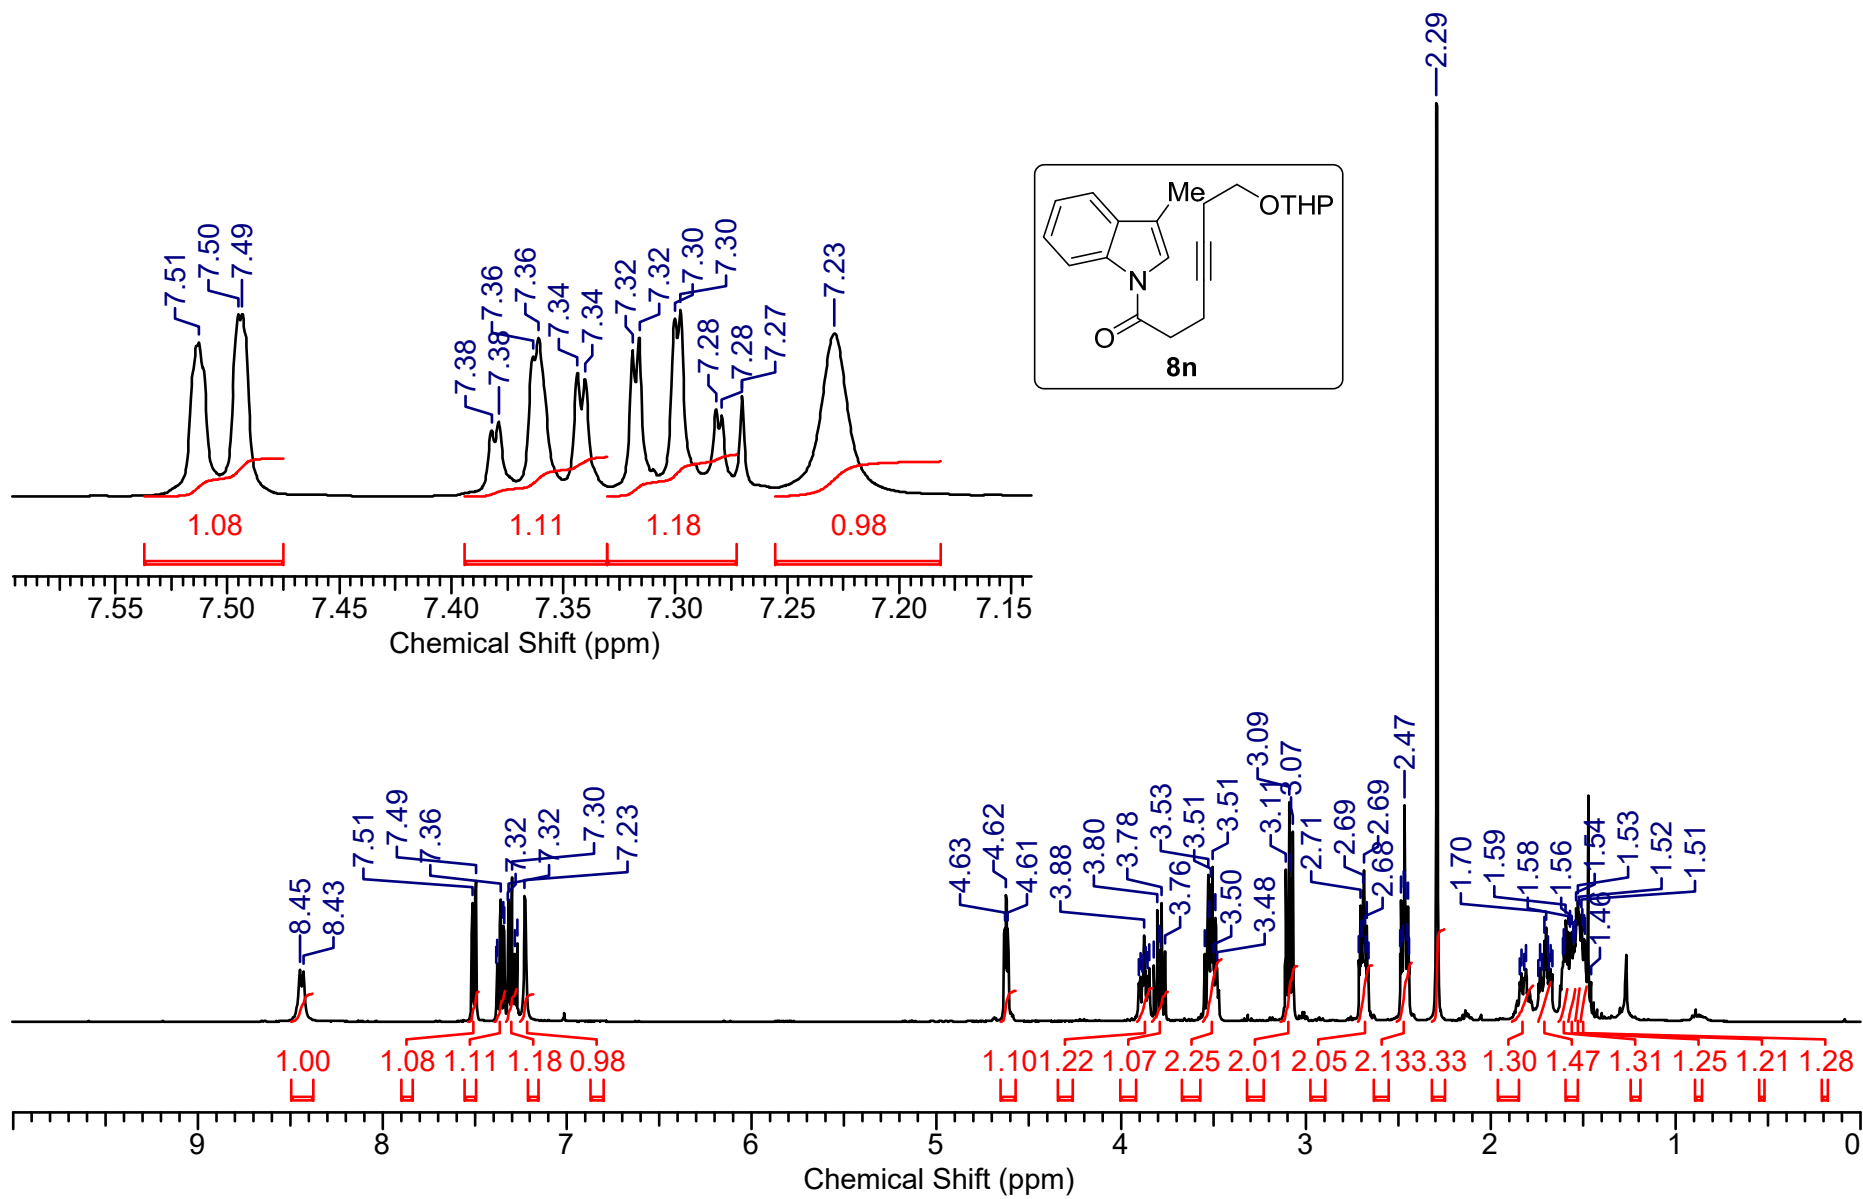

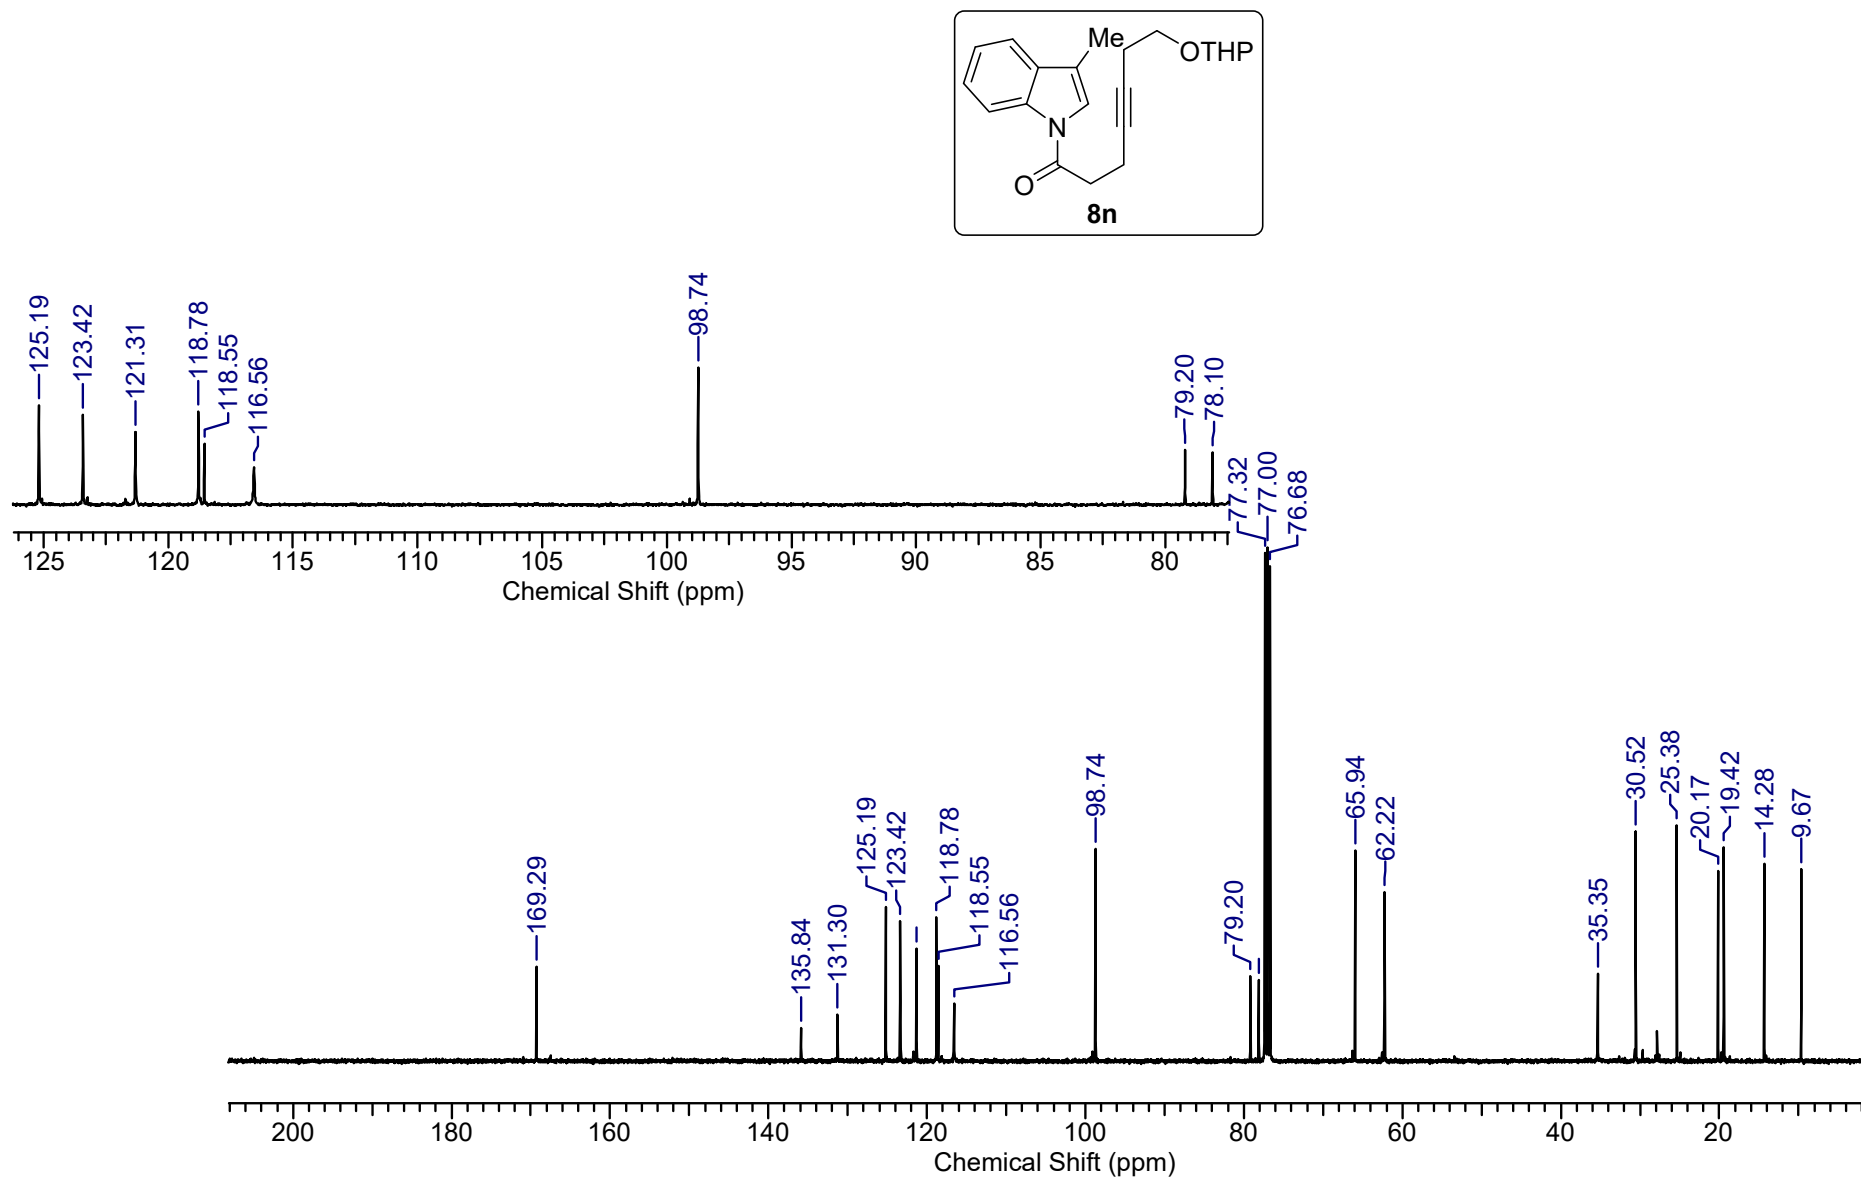

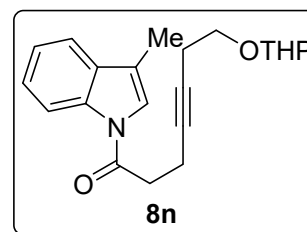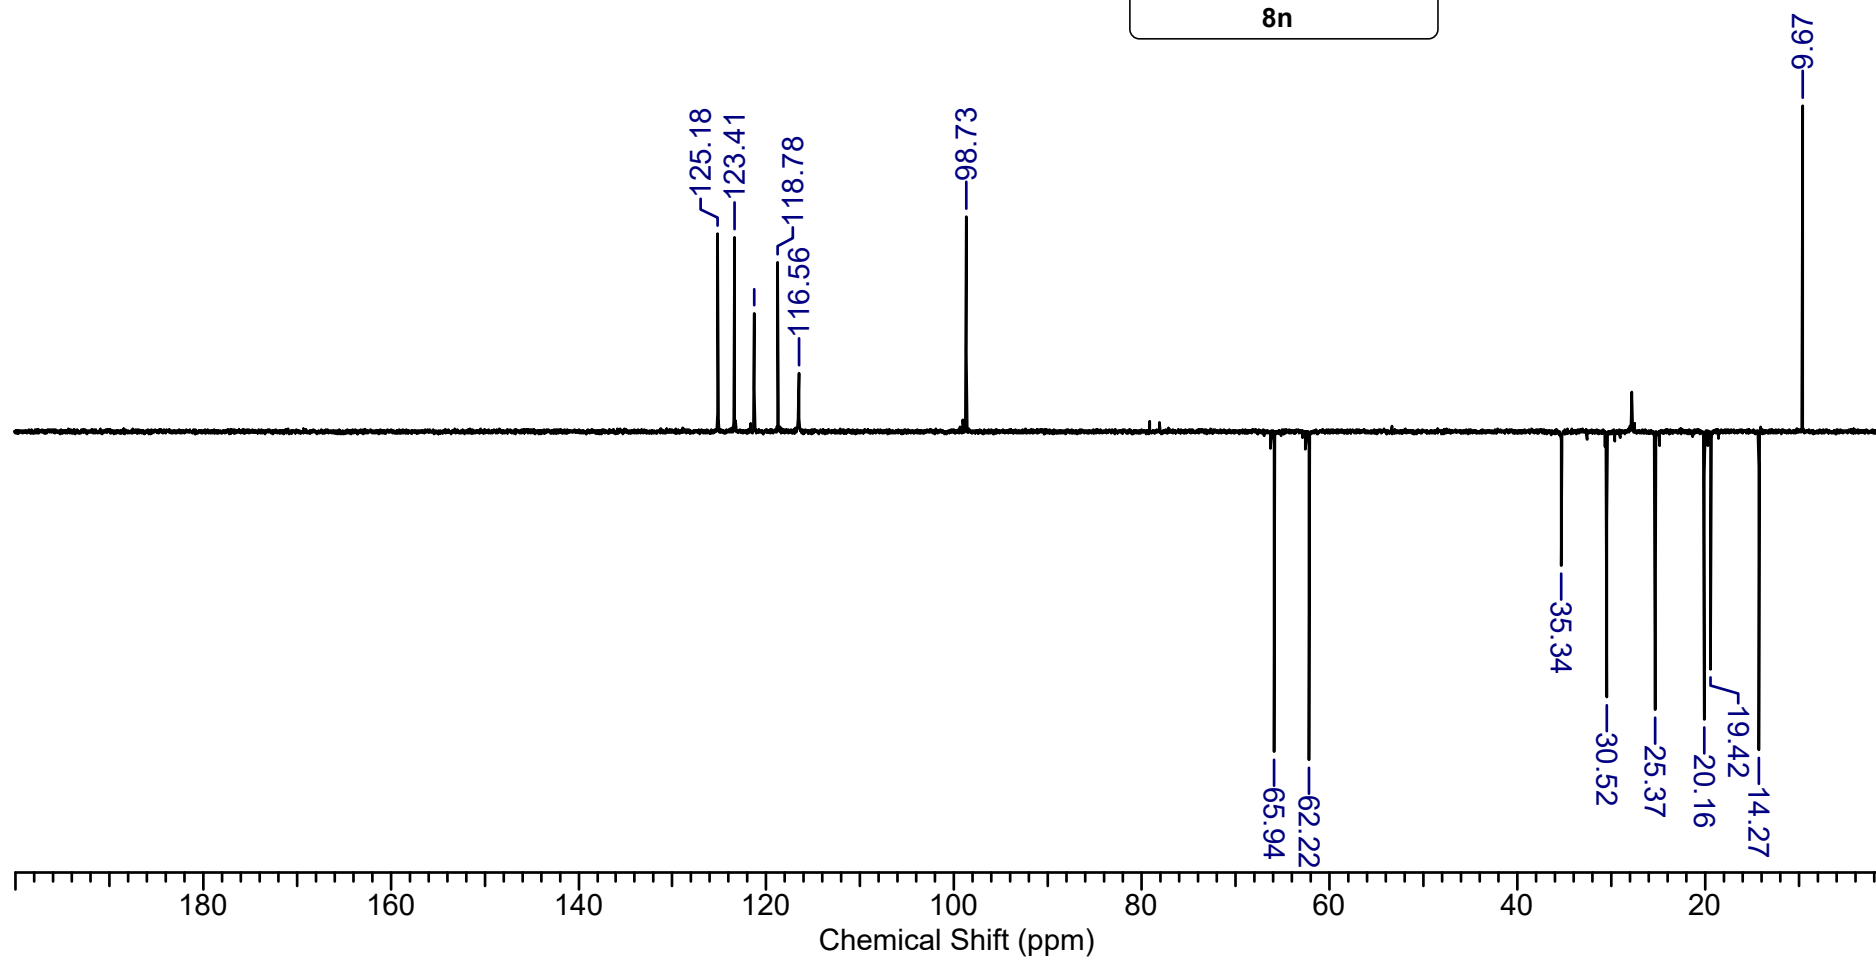

MSH-10 #330 RT: 1.79 AV: 1 NL: 1.90E5  
T: FTMS + p ESI Full ms [100.0000-1500.0000]

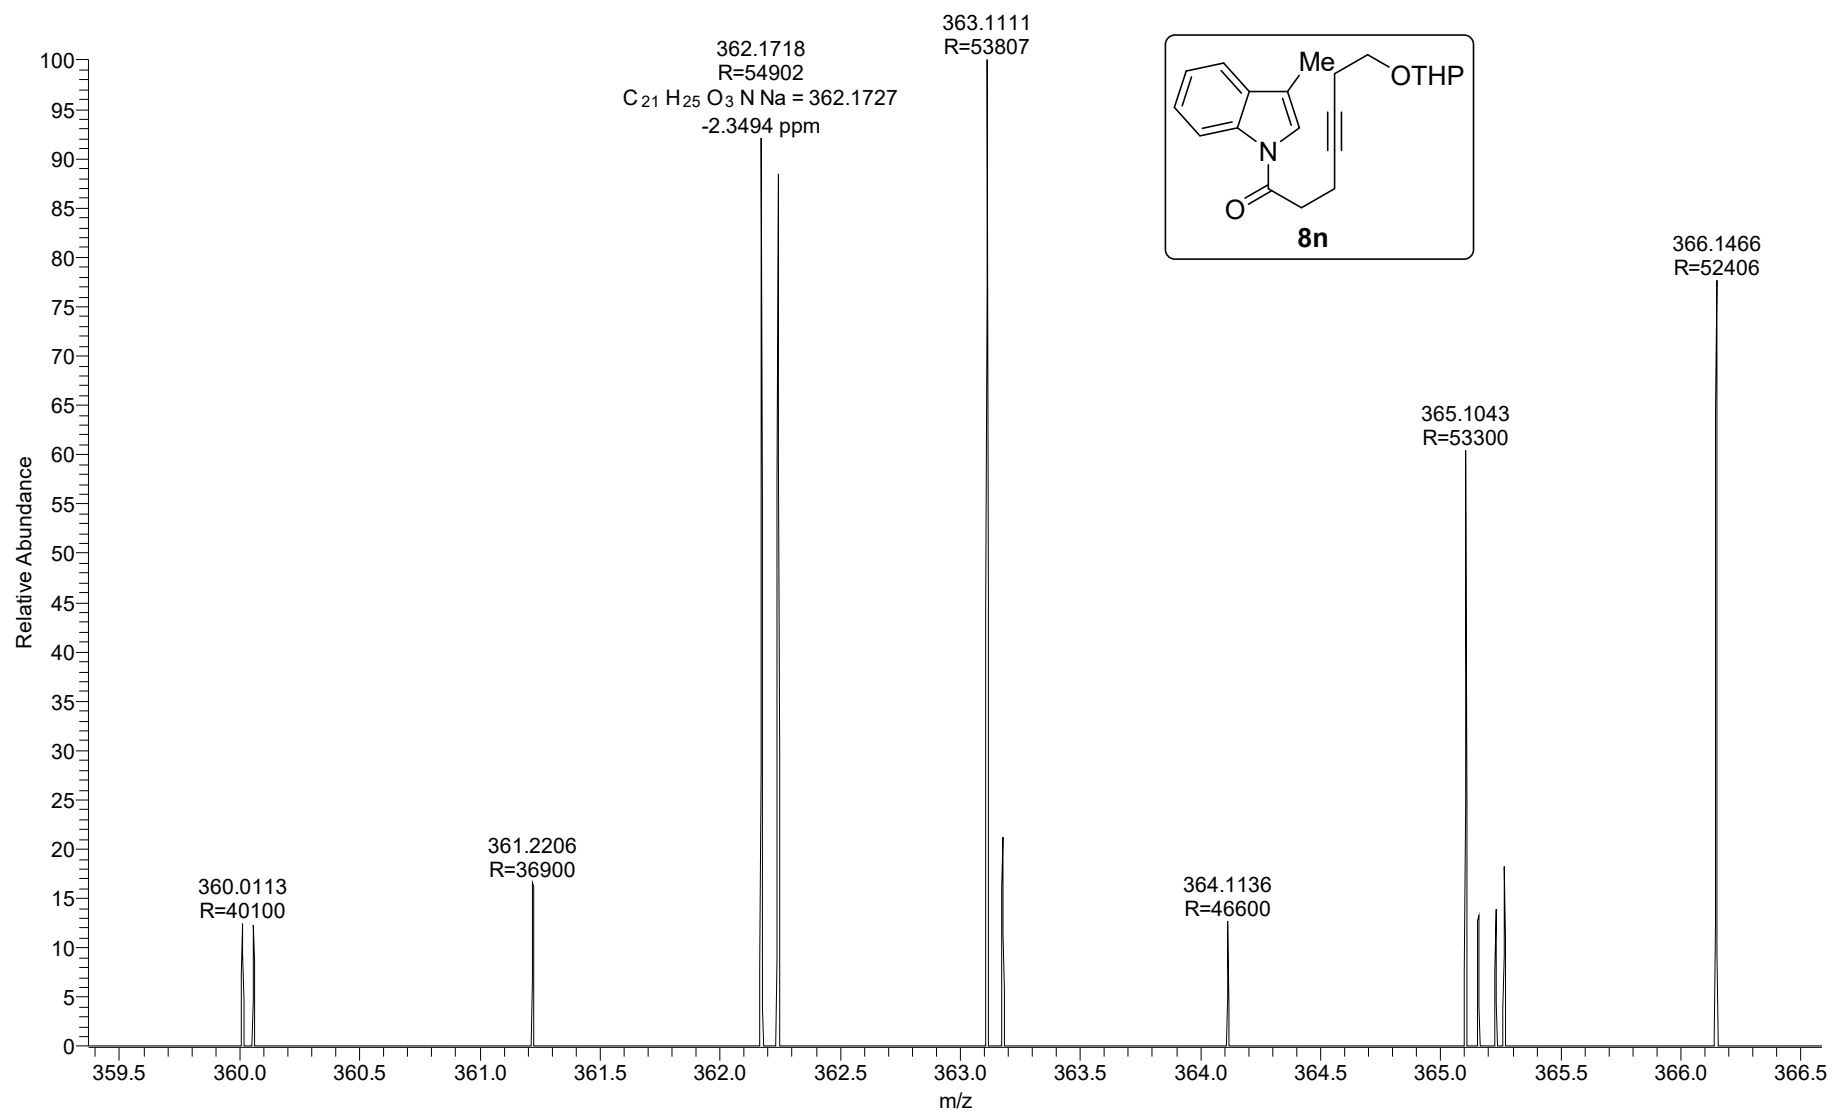

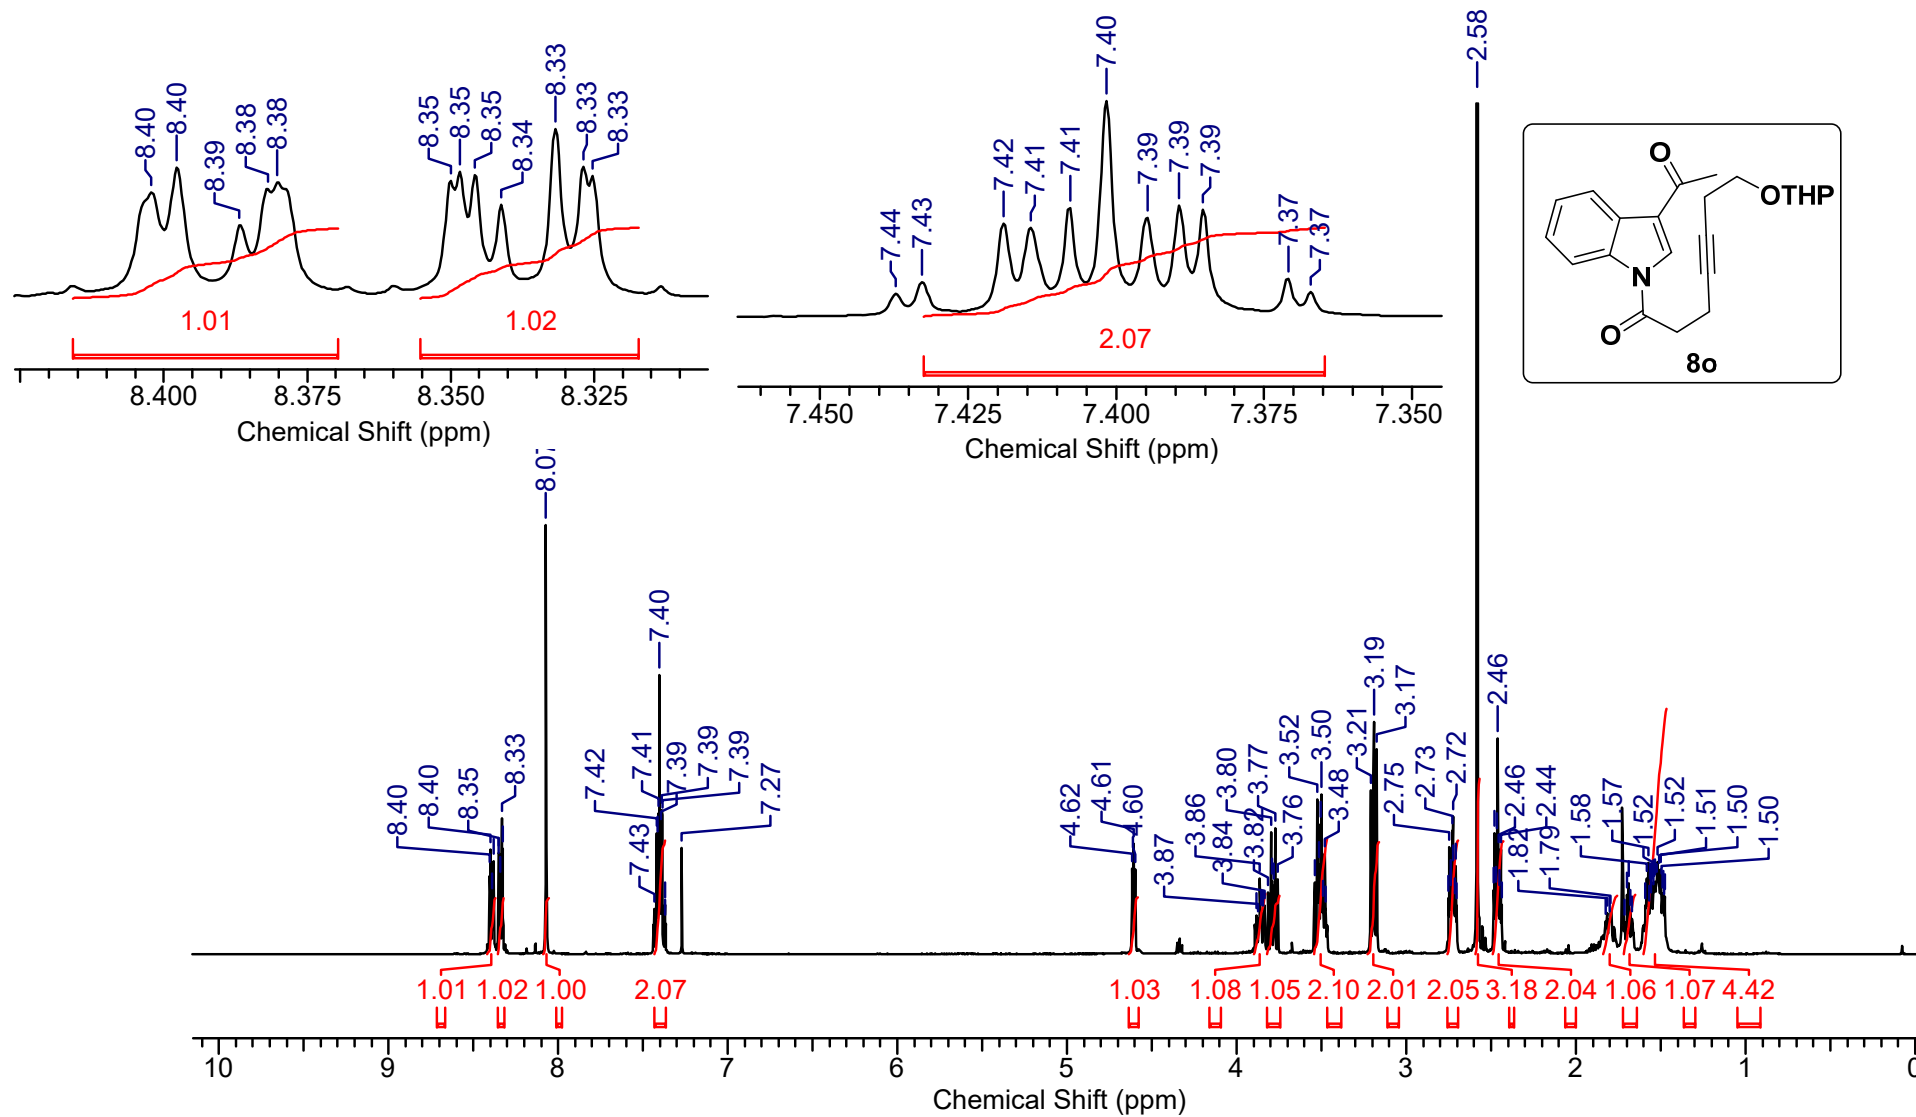

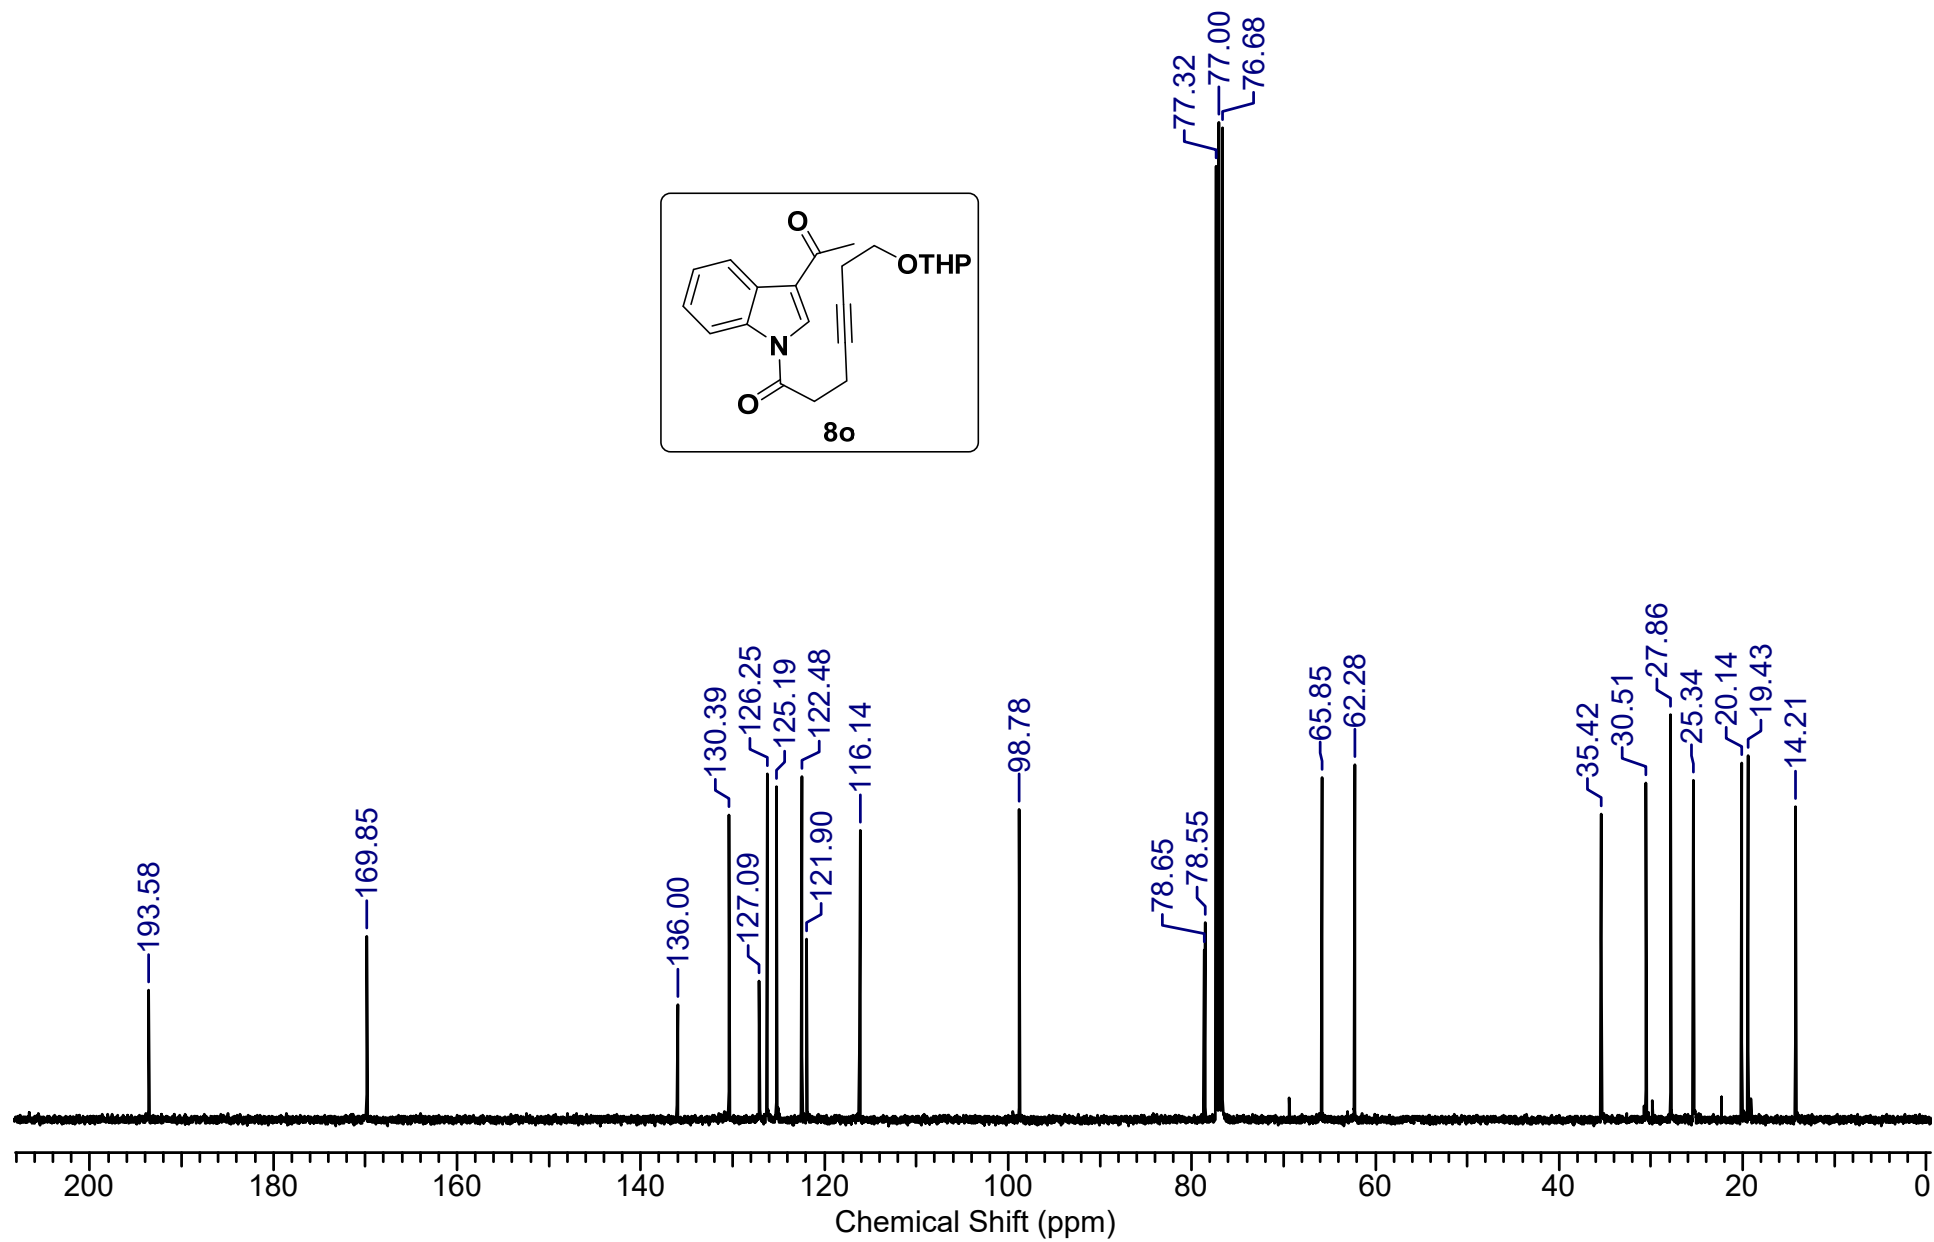

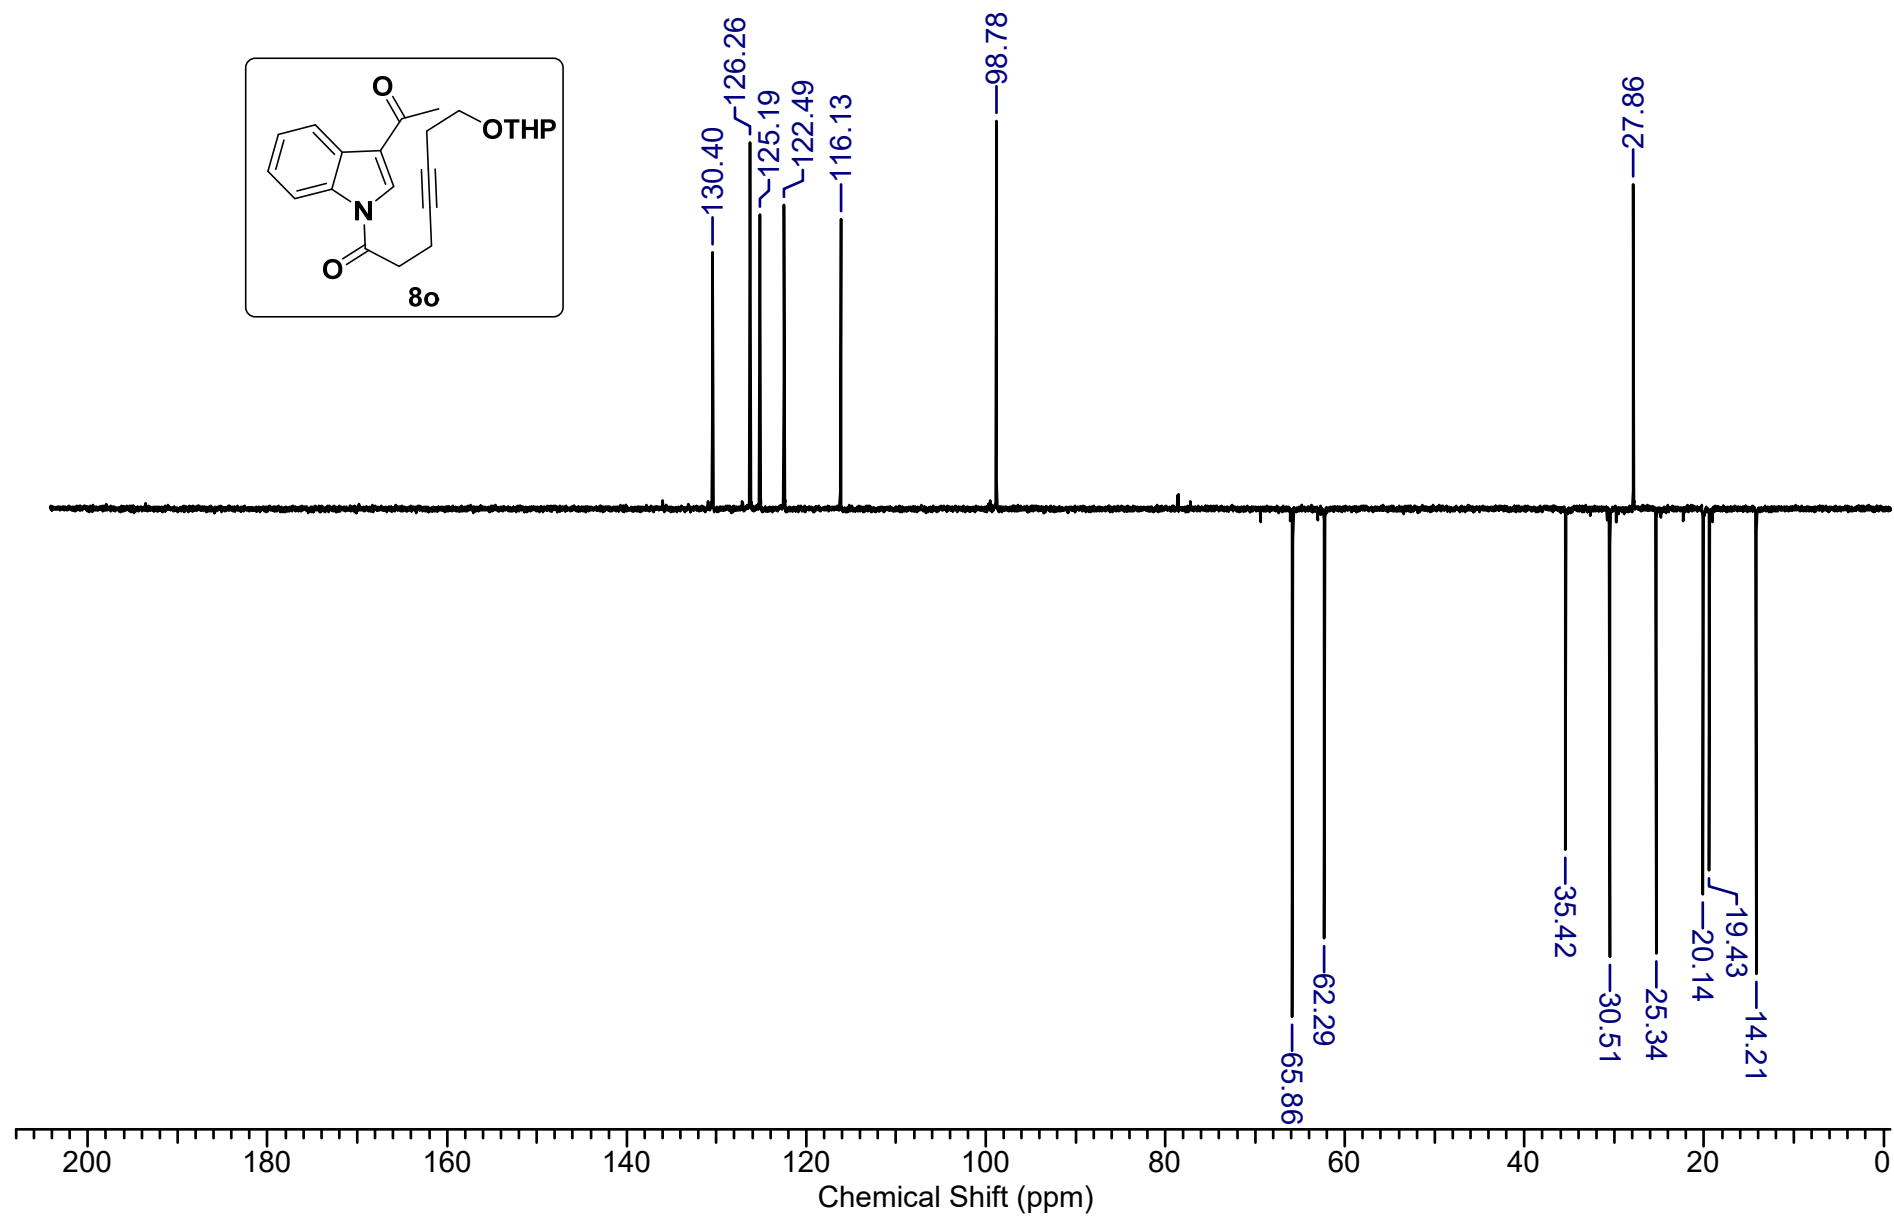



MSH-9 #311 RT: 1.69 AV: 1 NL: 2.61E8  
T: FTMS + p ESI Full ms [100.0000-1500.0000]

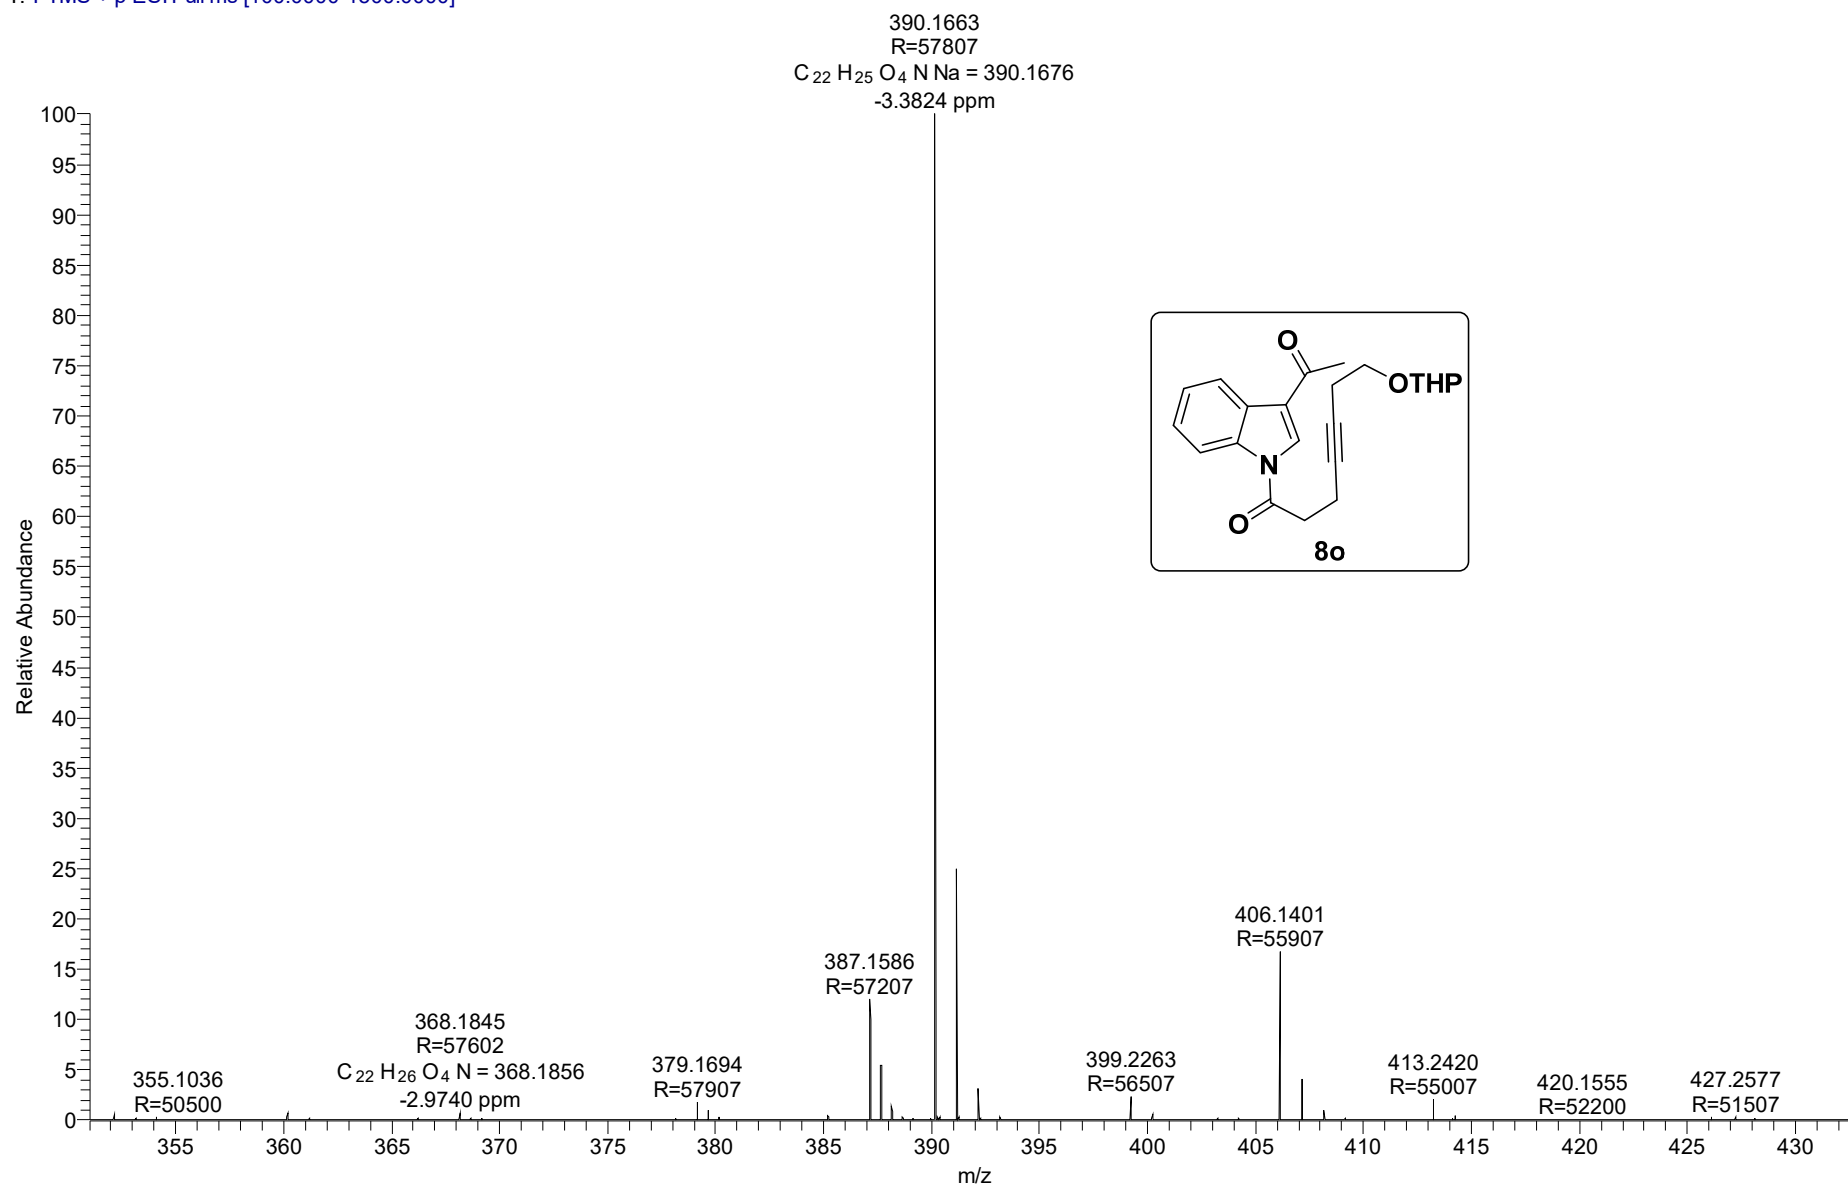

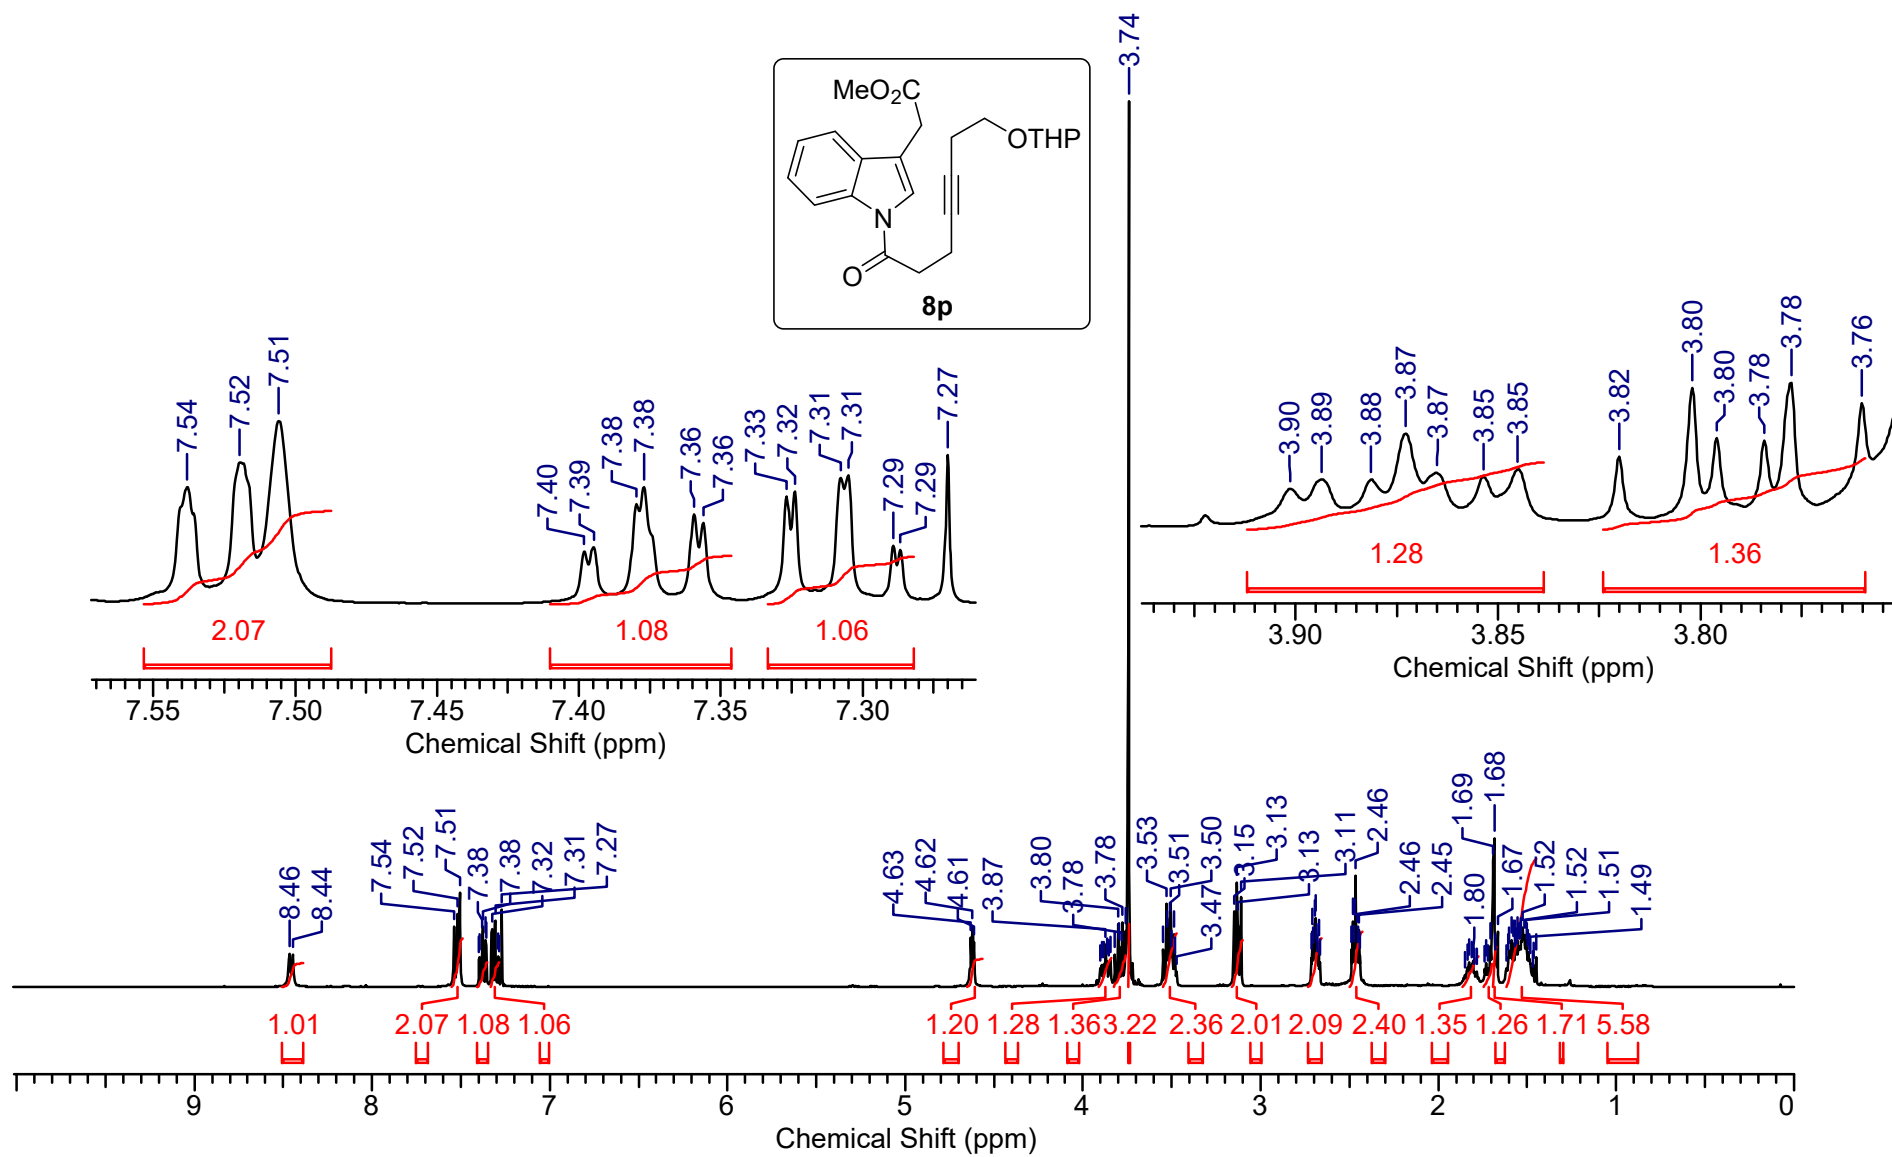

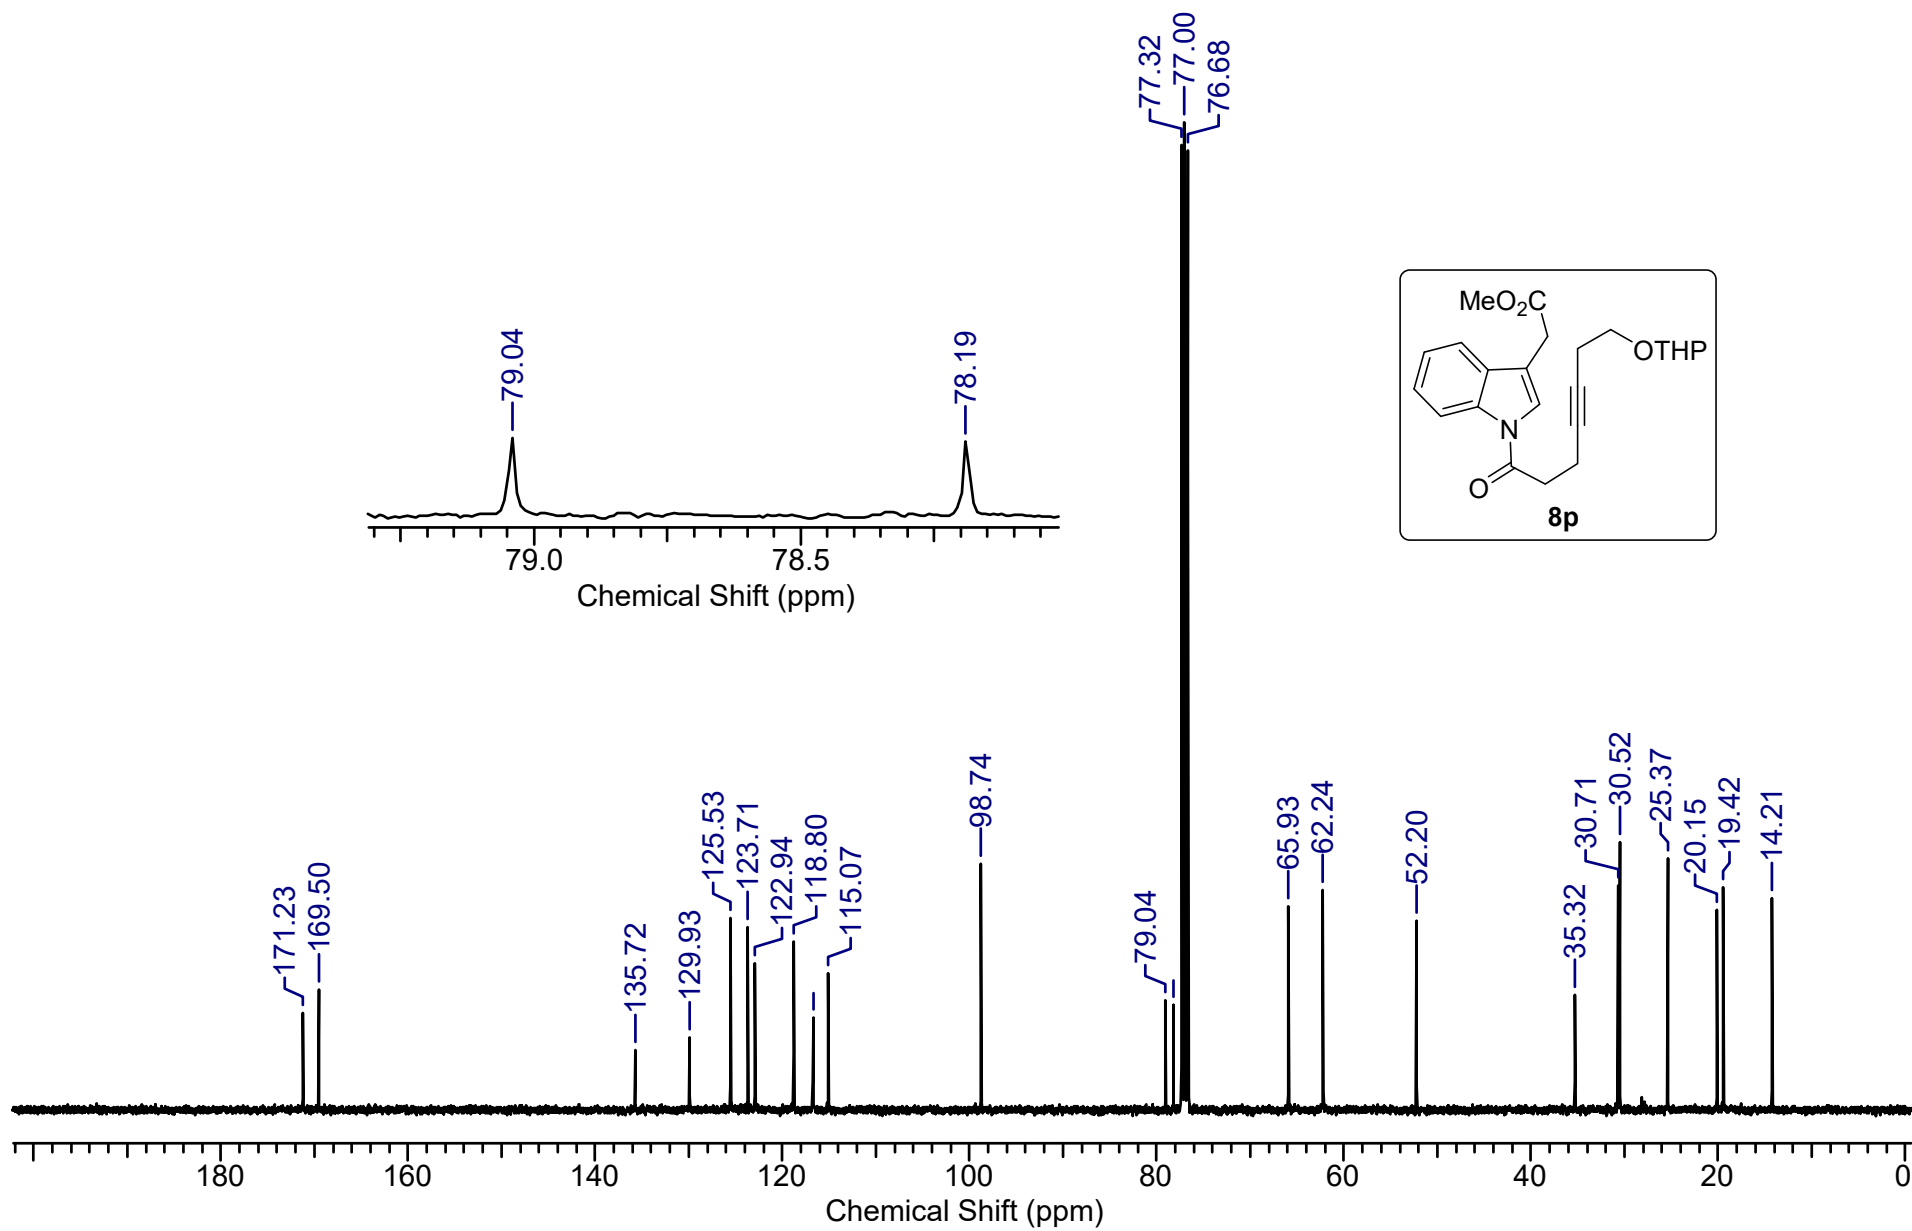

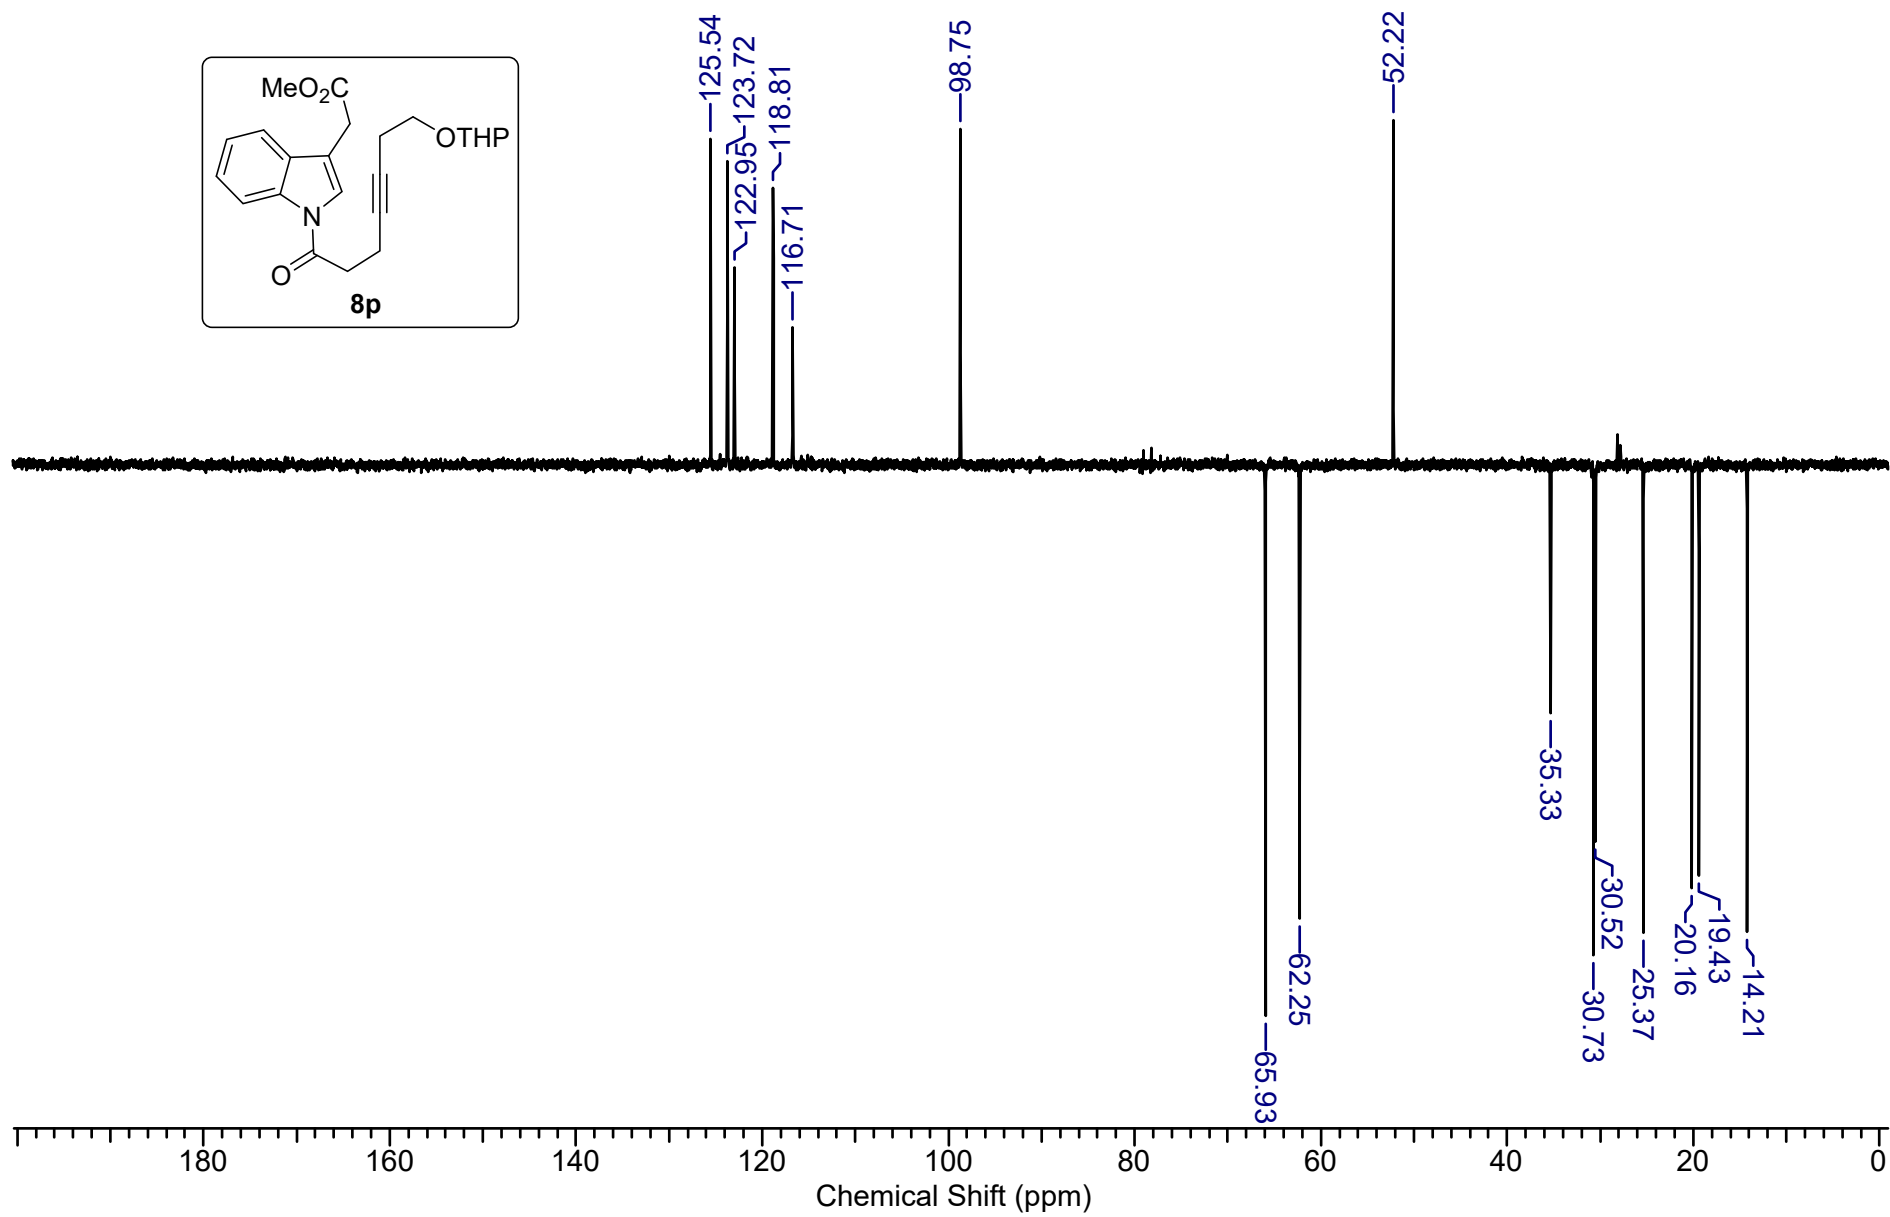

MSH-47 #437 RT: 2.37 AV: 1 NL: 3.32E6  
T: FTMS + p ESI Full ms [100.0000-1500.0000]

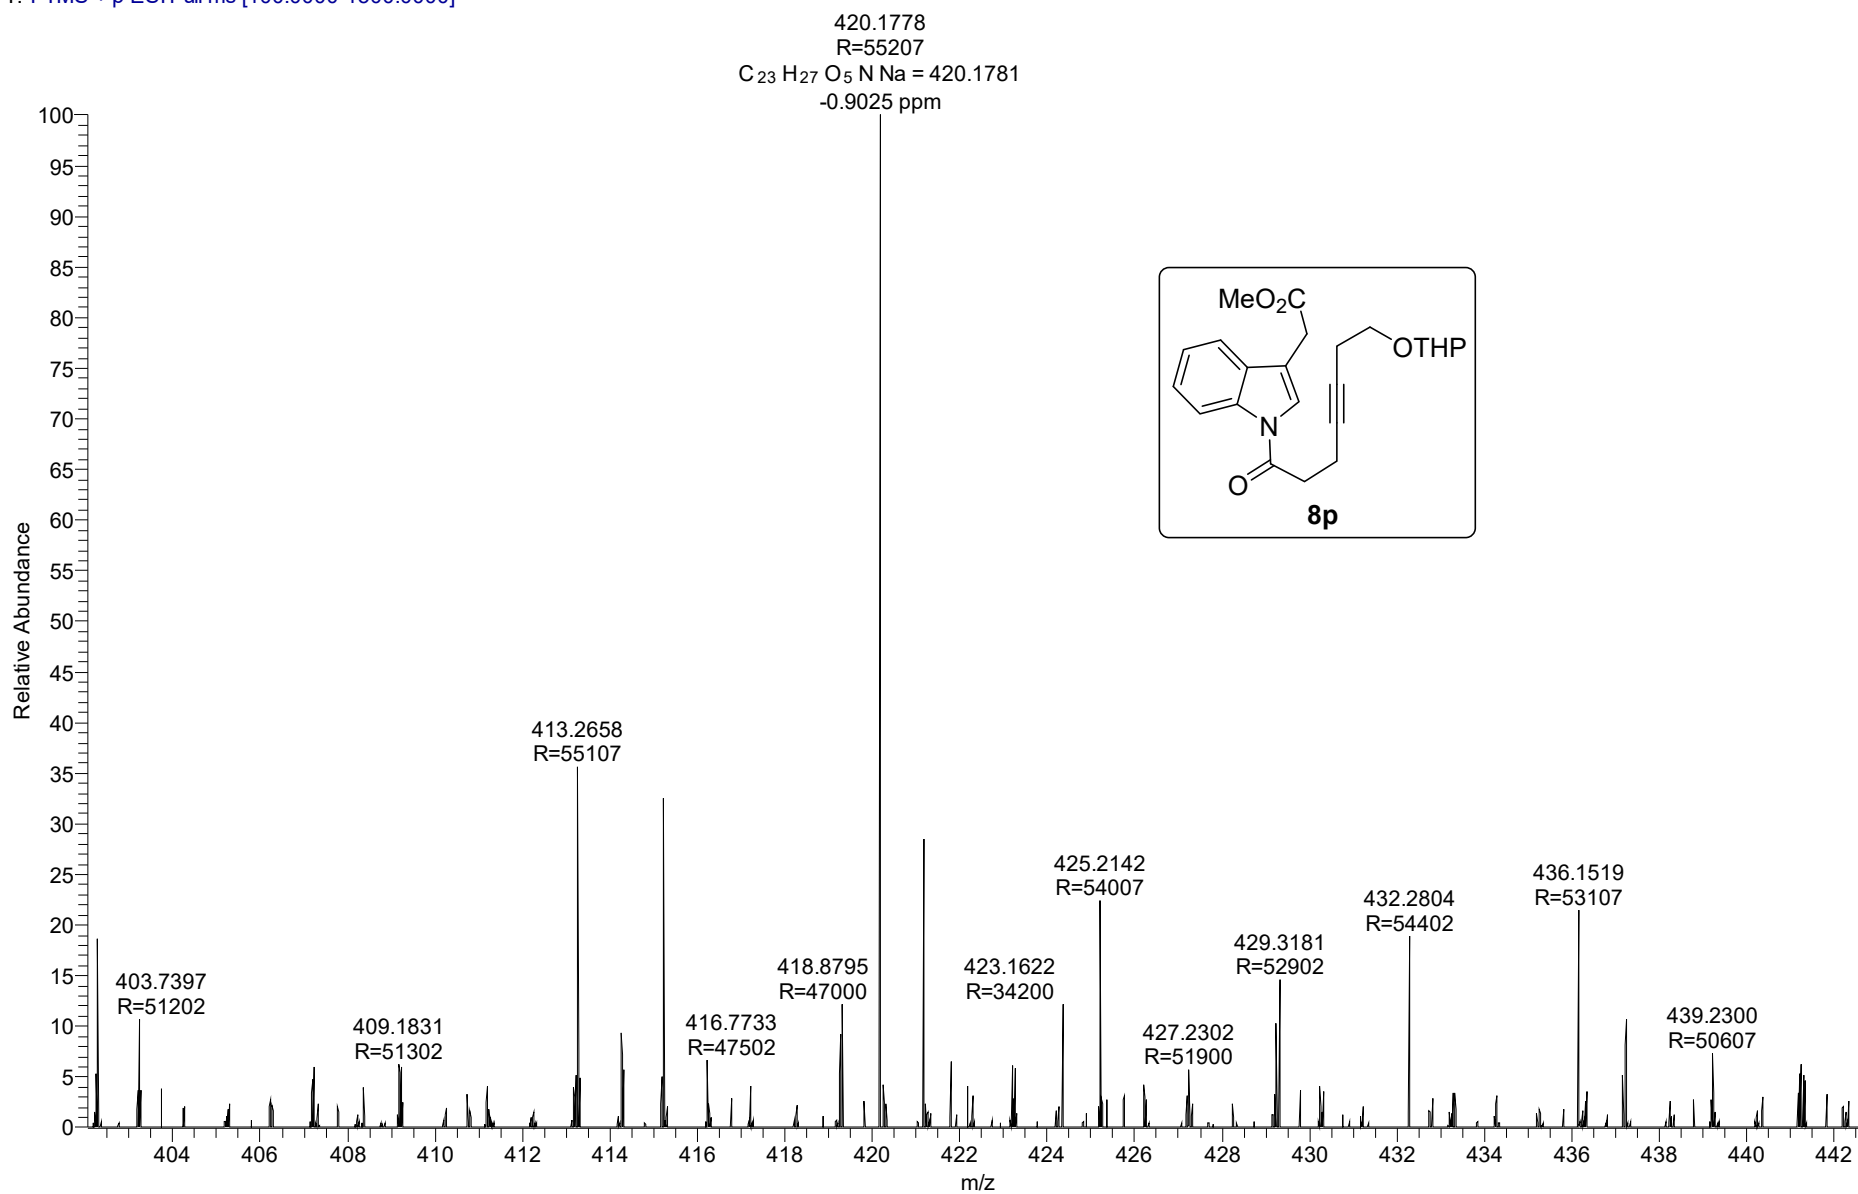

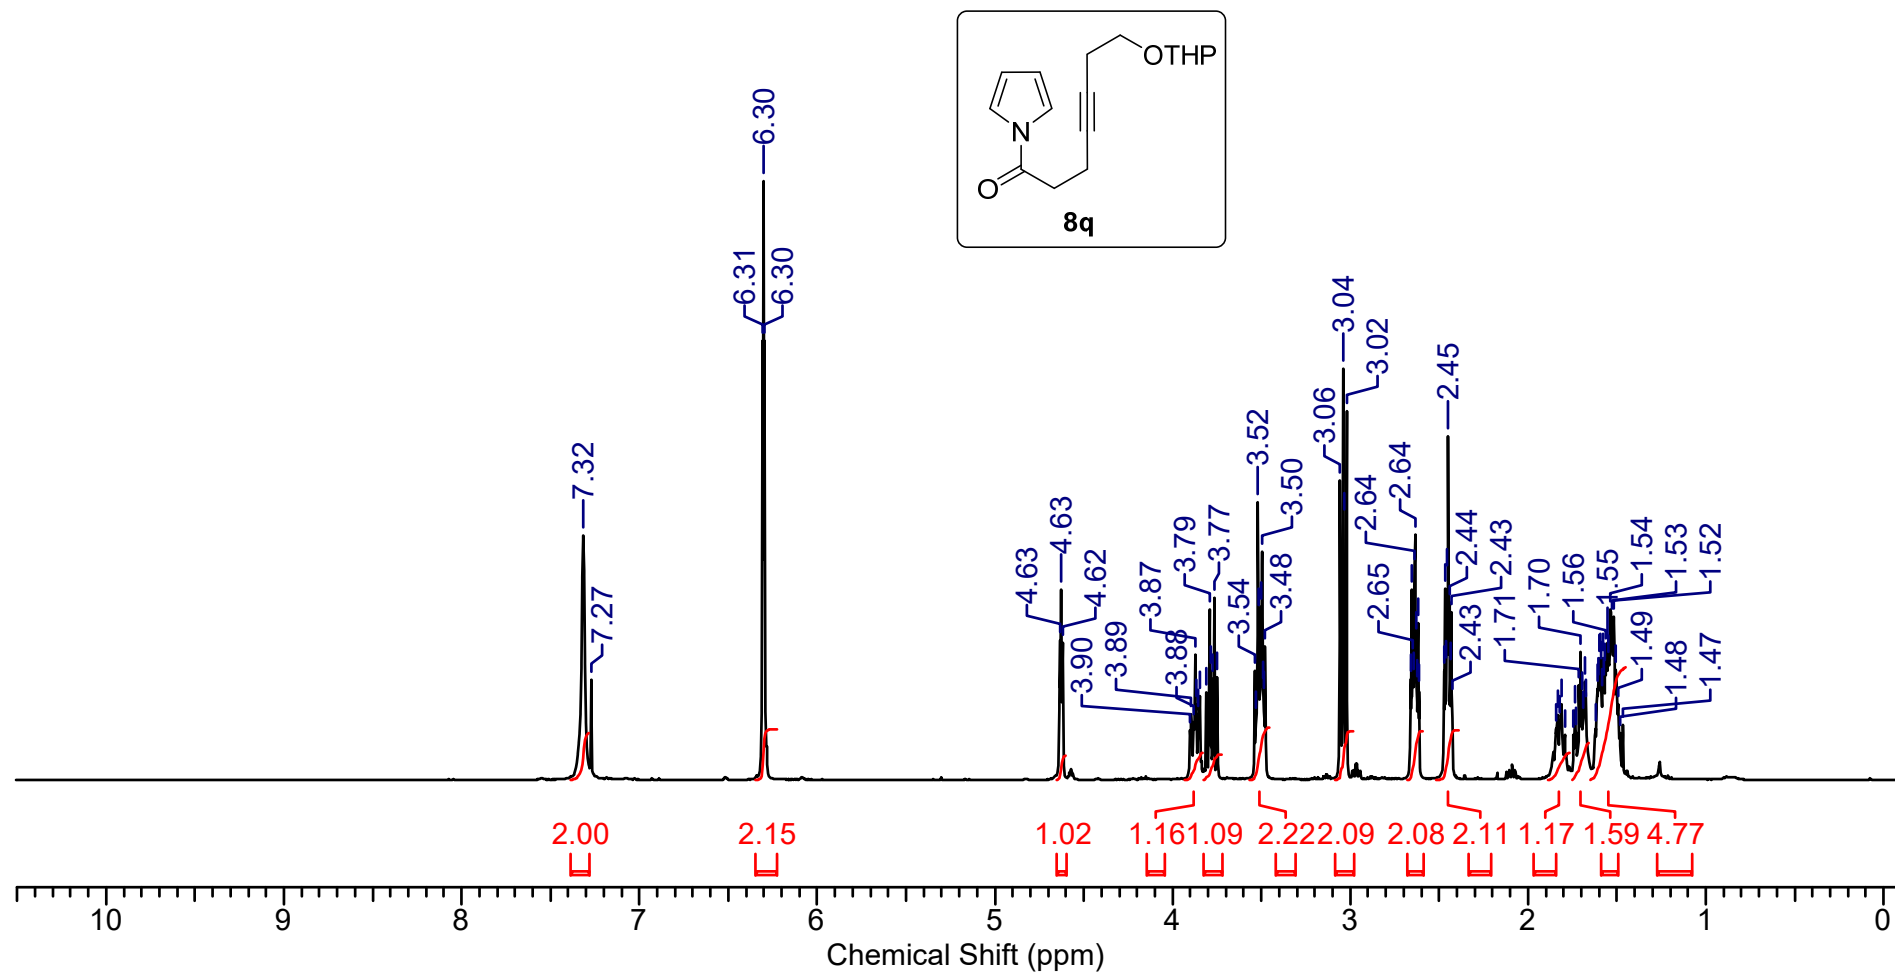

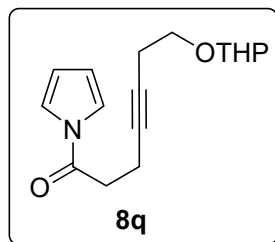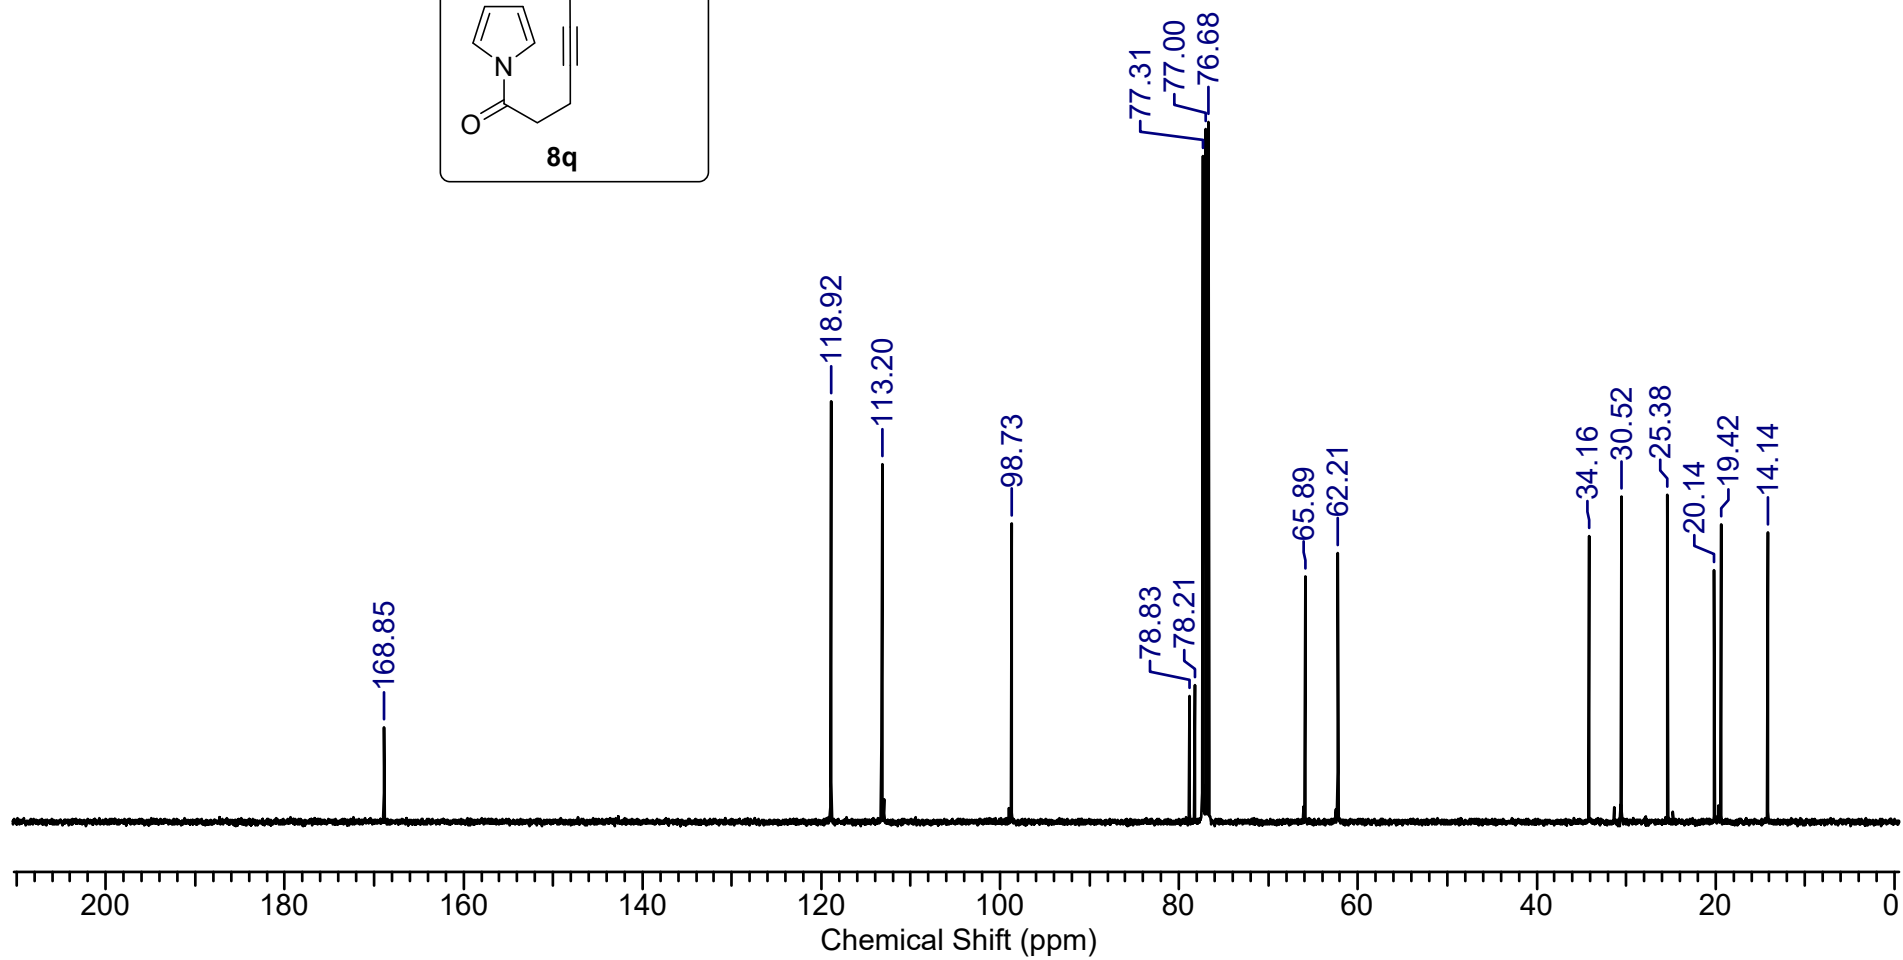

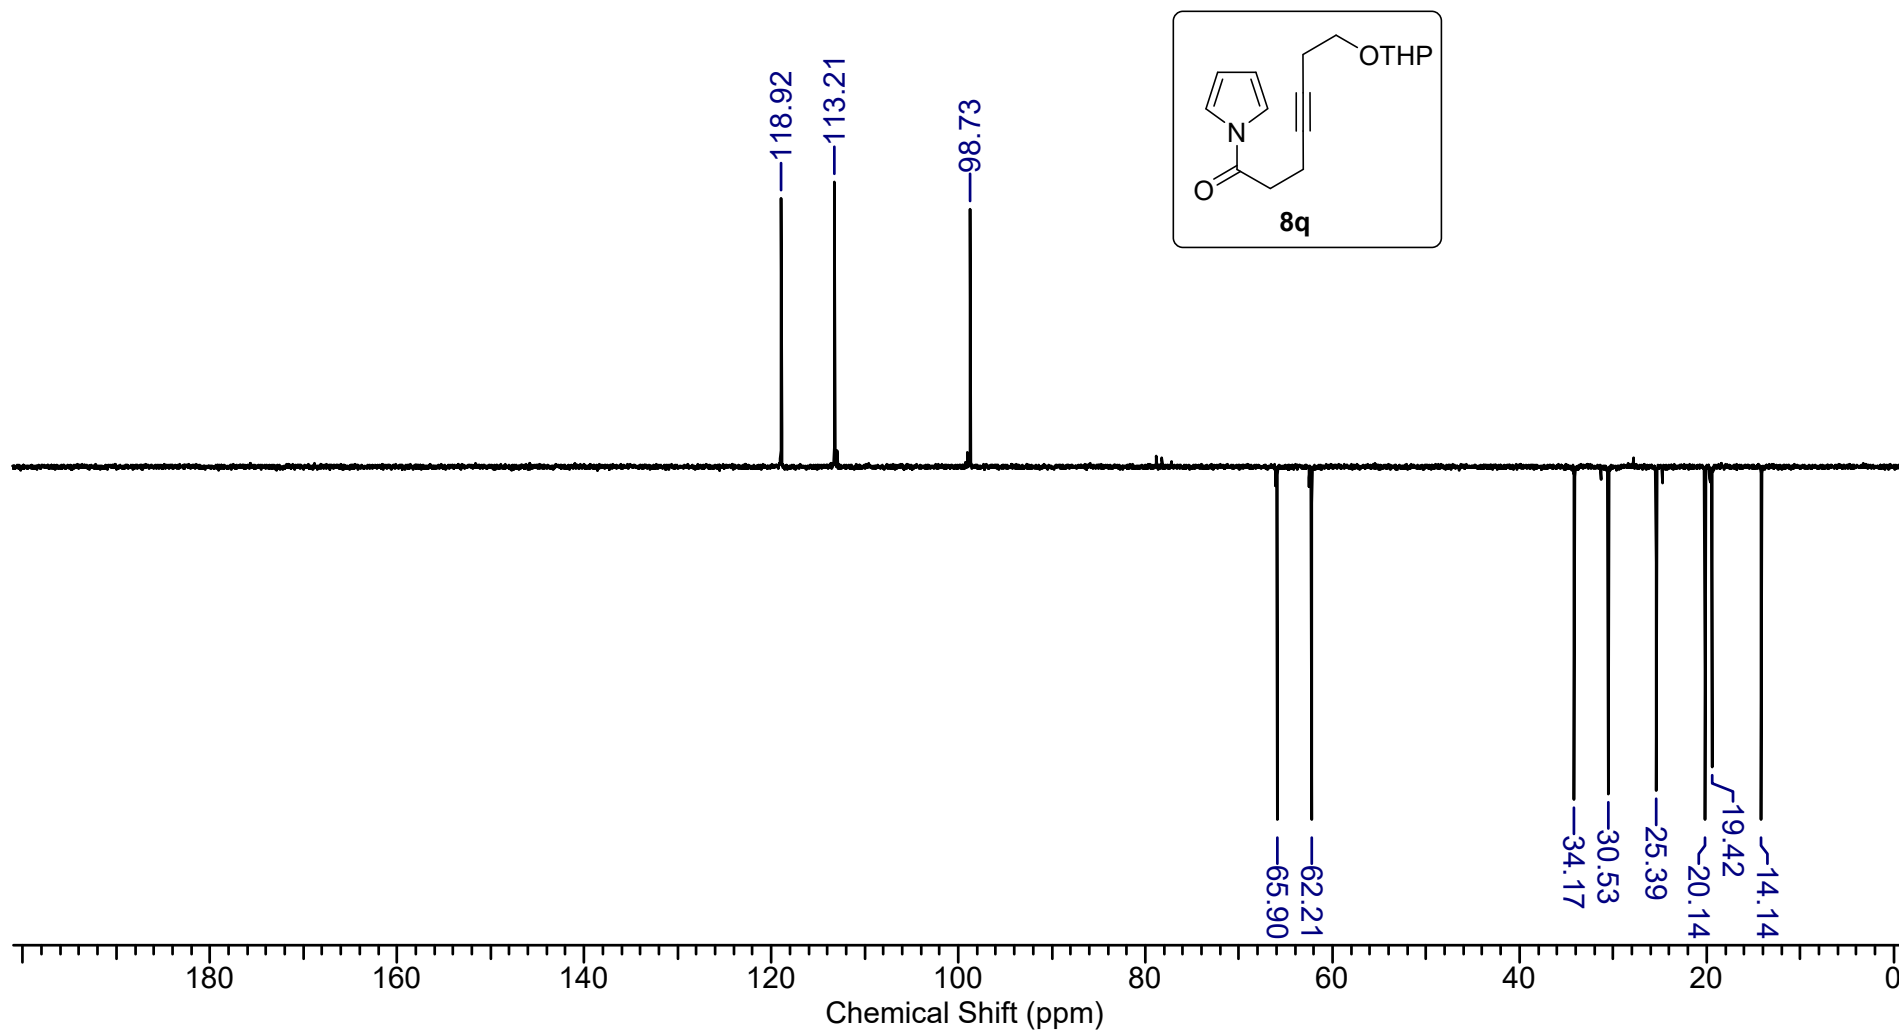



MSH-16 #330 RT: 1.78 AV: 1 NL: 2.69E8  
T: FTMS + p ESI Full ms [100.0000-1500.0000]

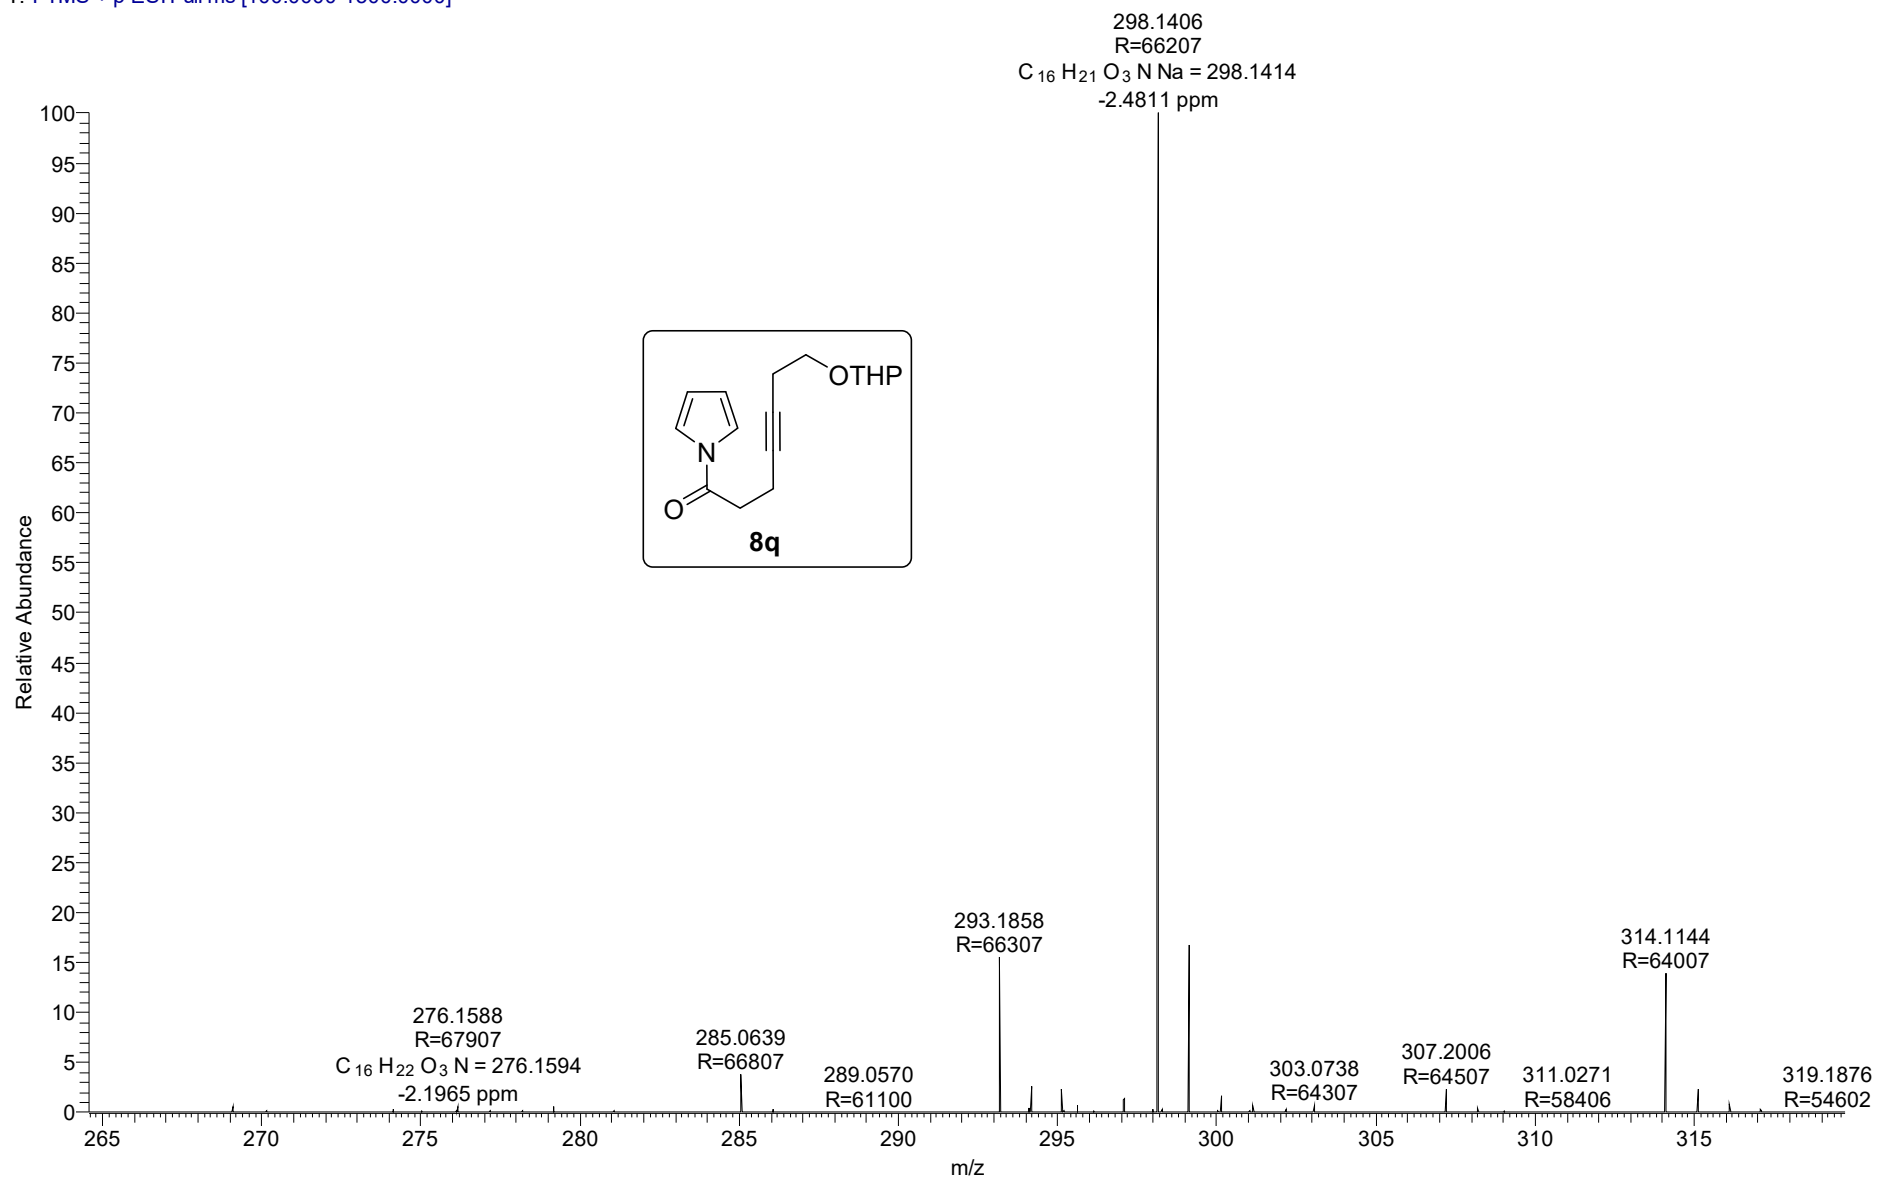

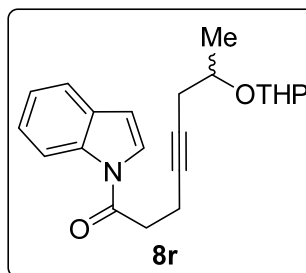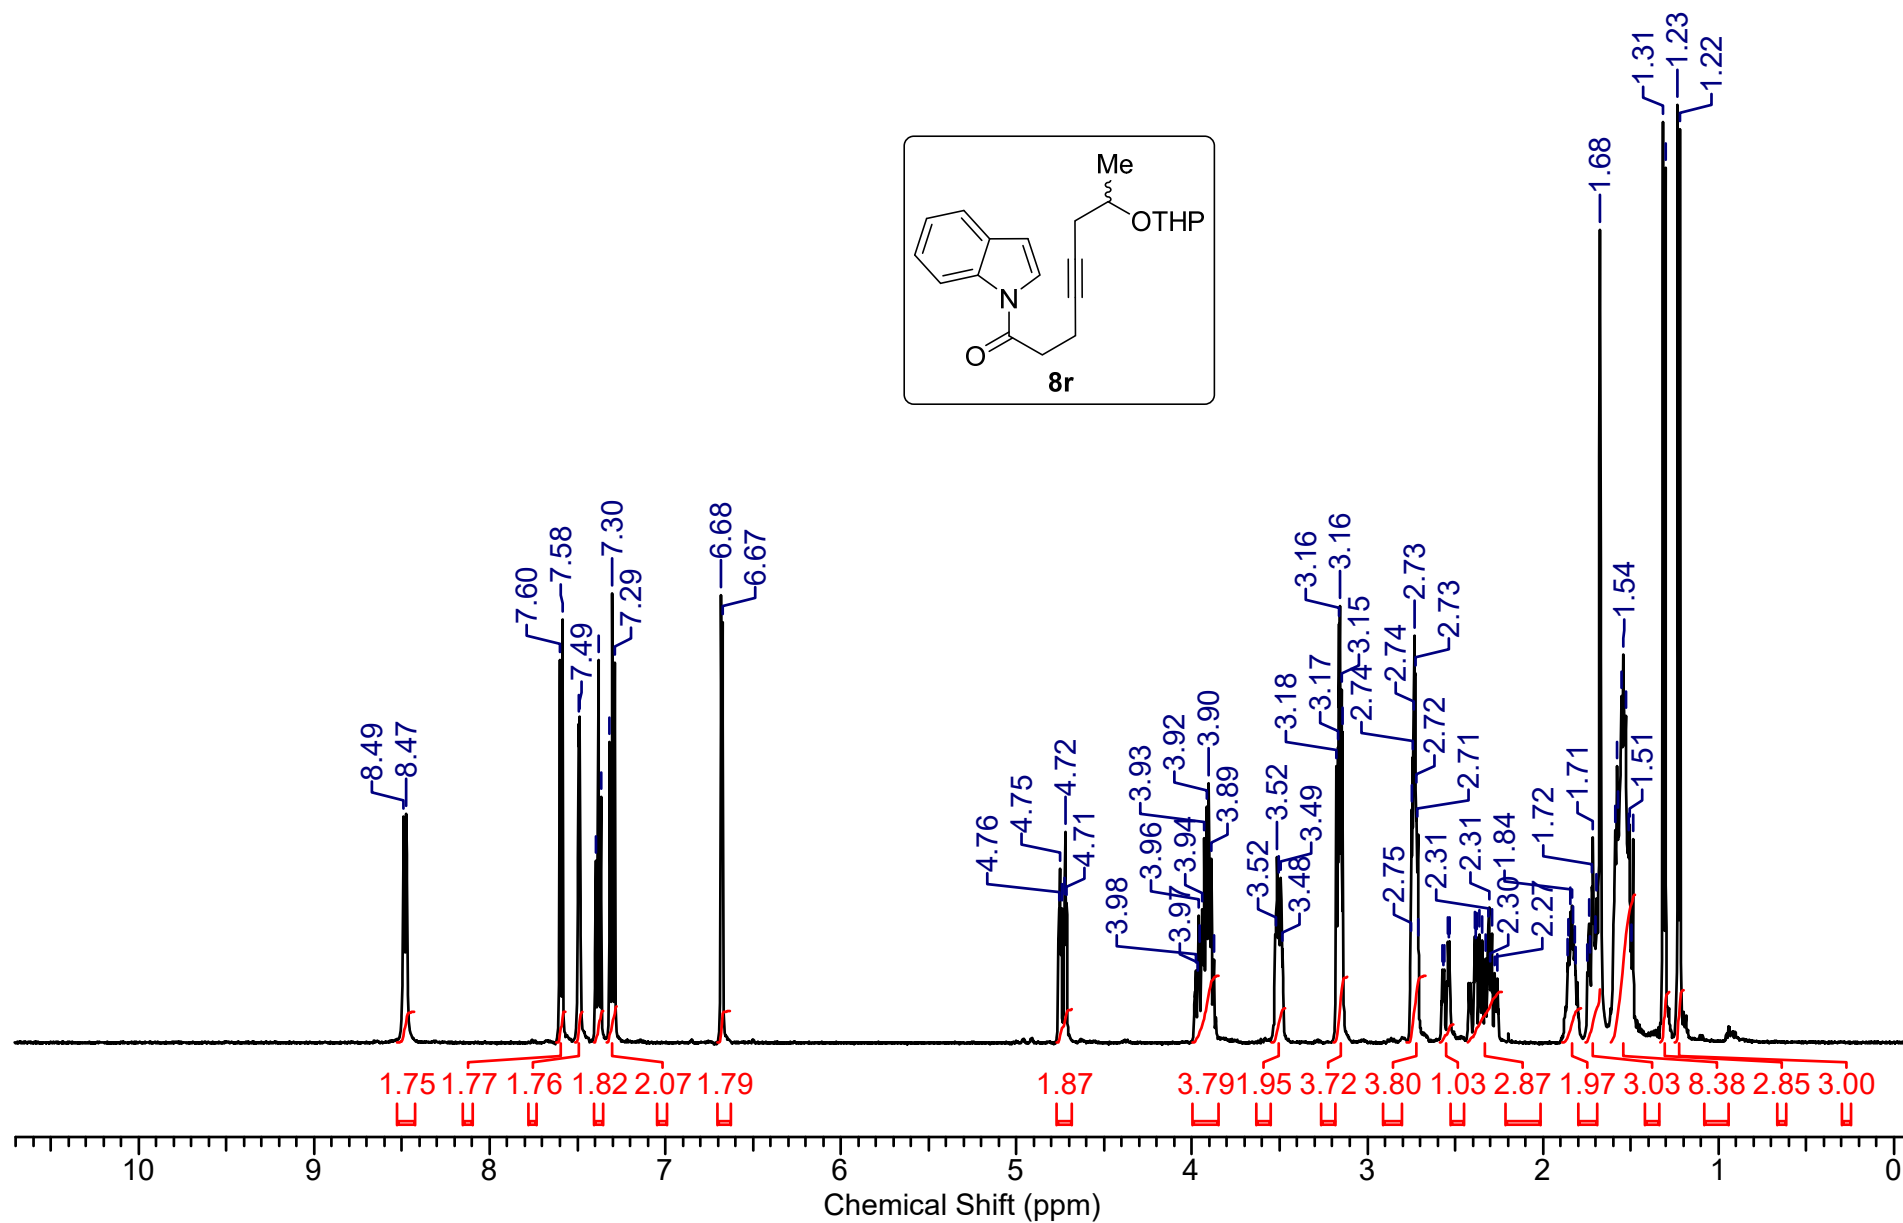

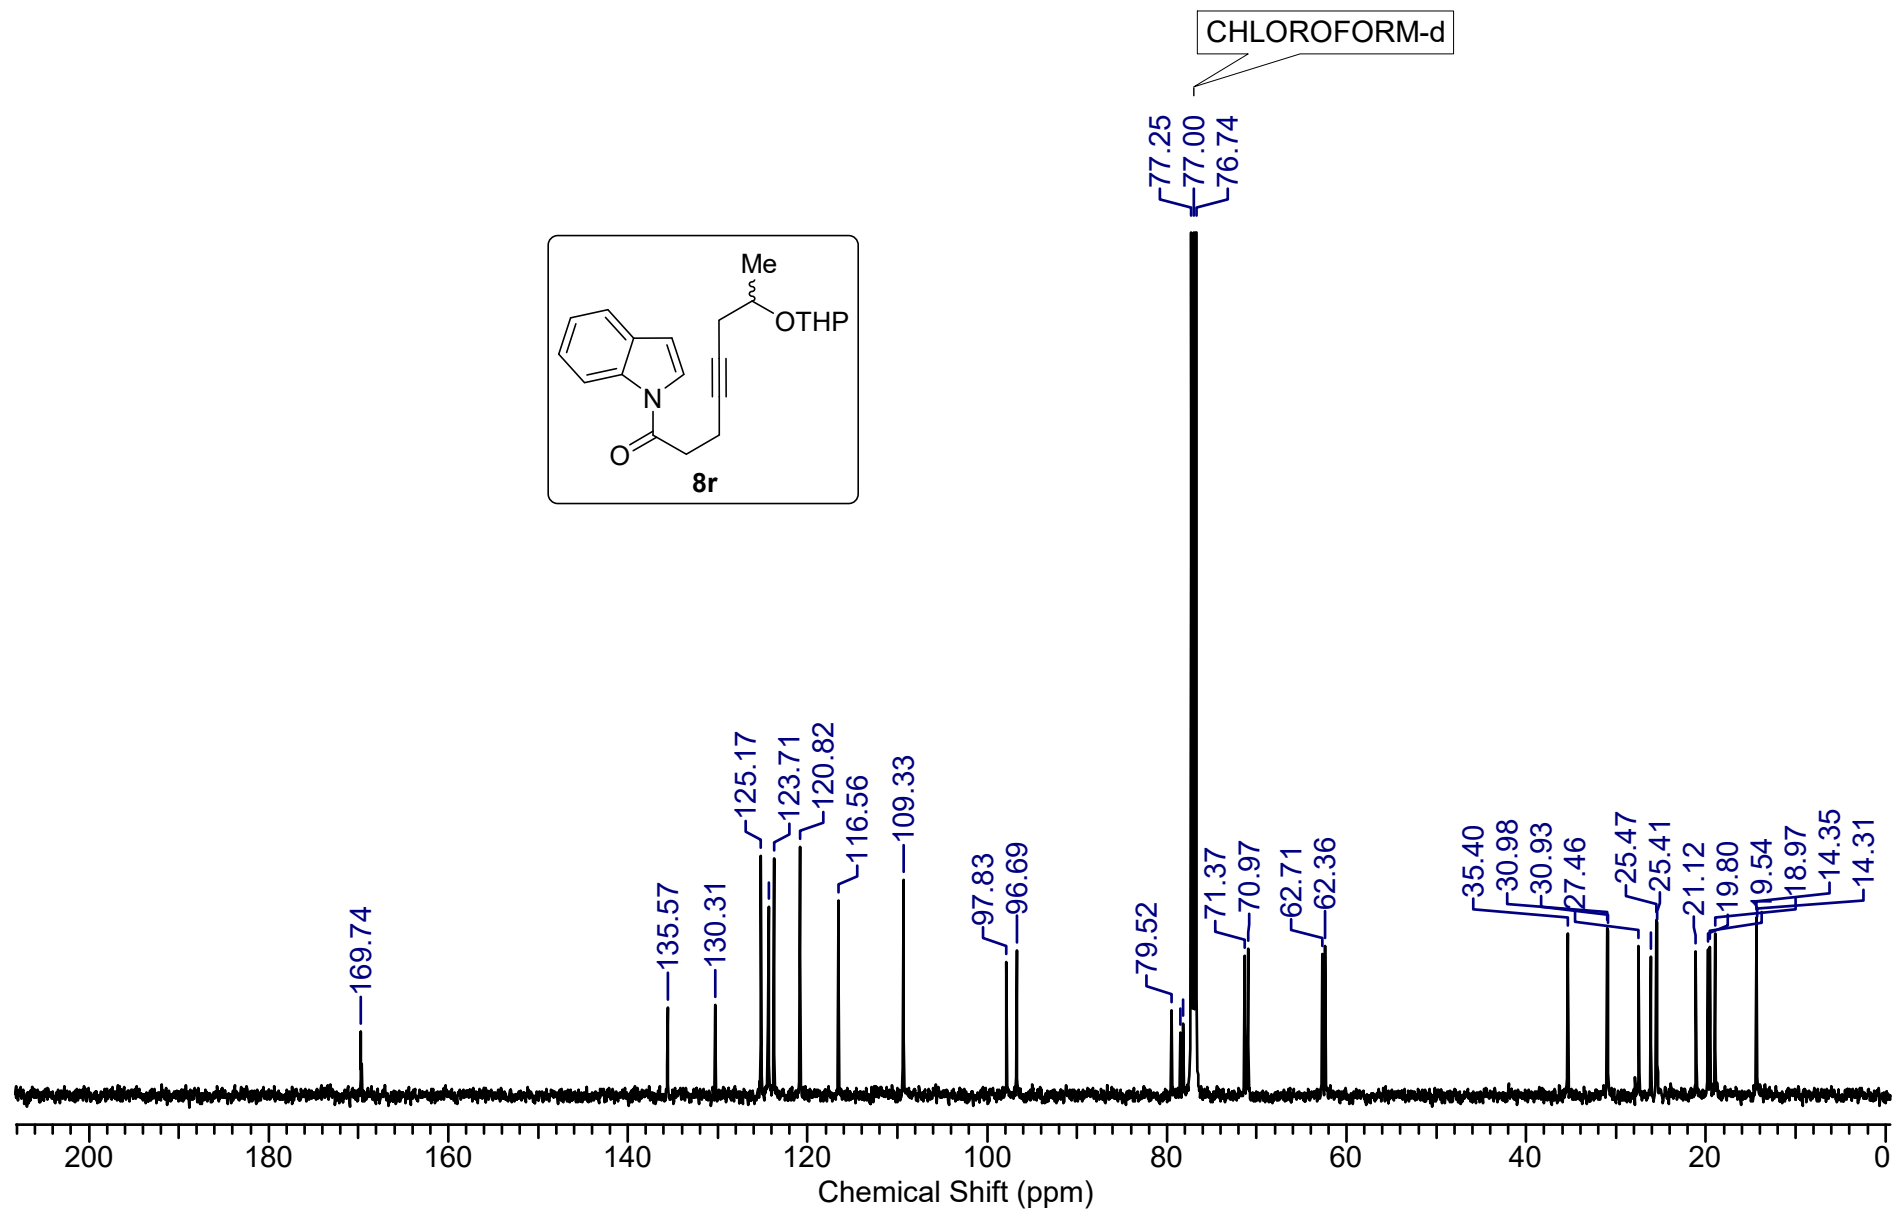

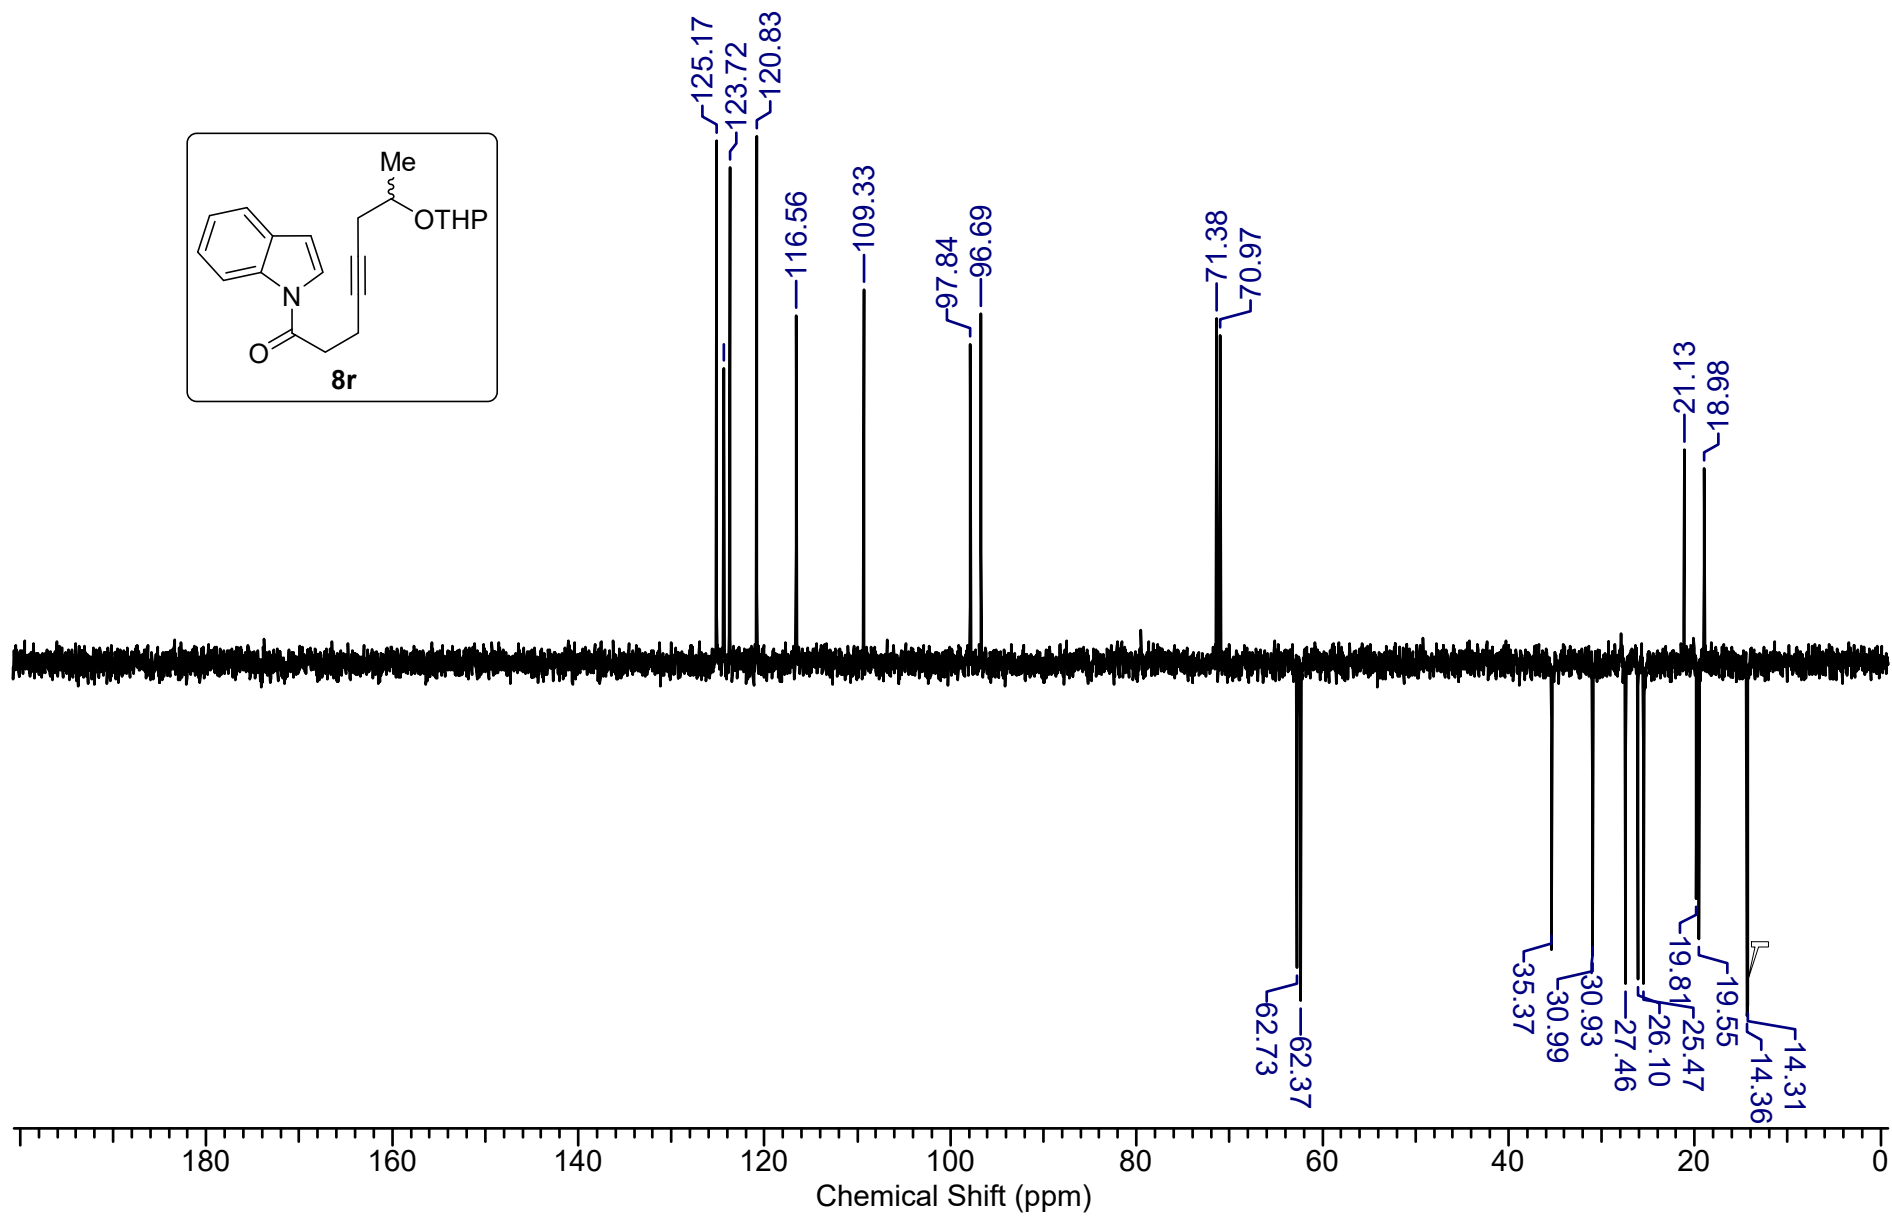

MSH-32 #382 RT: 2.07 AV: 1 NL: 1.32E8  
T: FTMS + p ESI Full ms [100.0000-1500.0000]

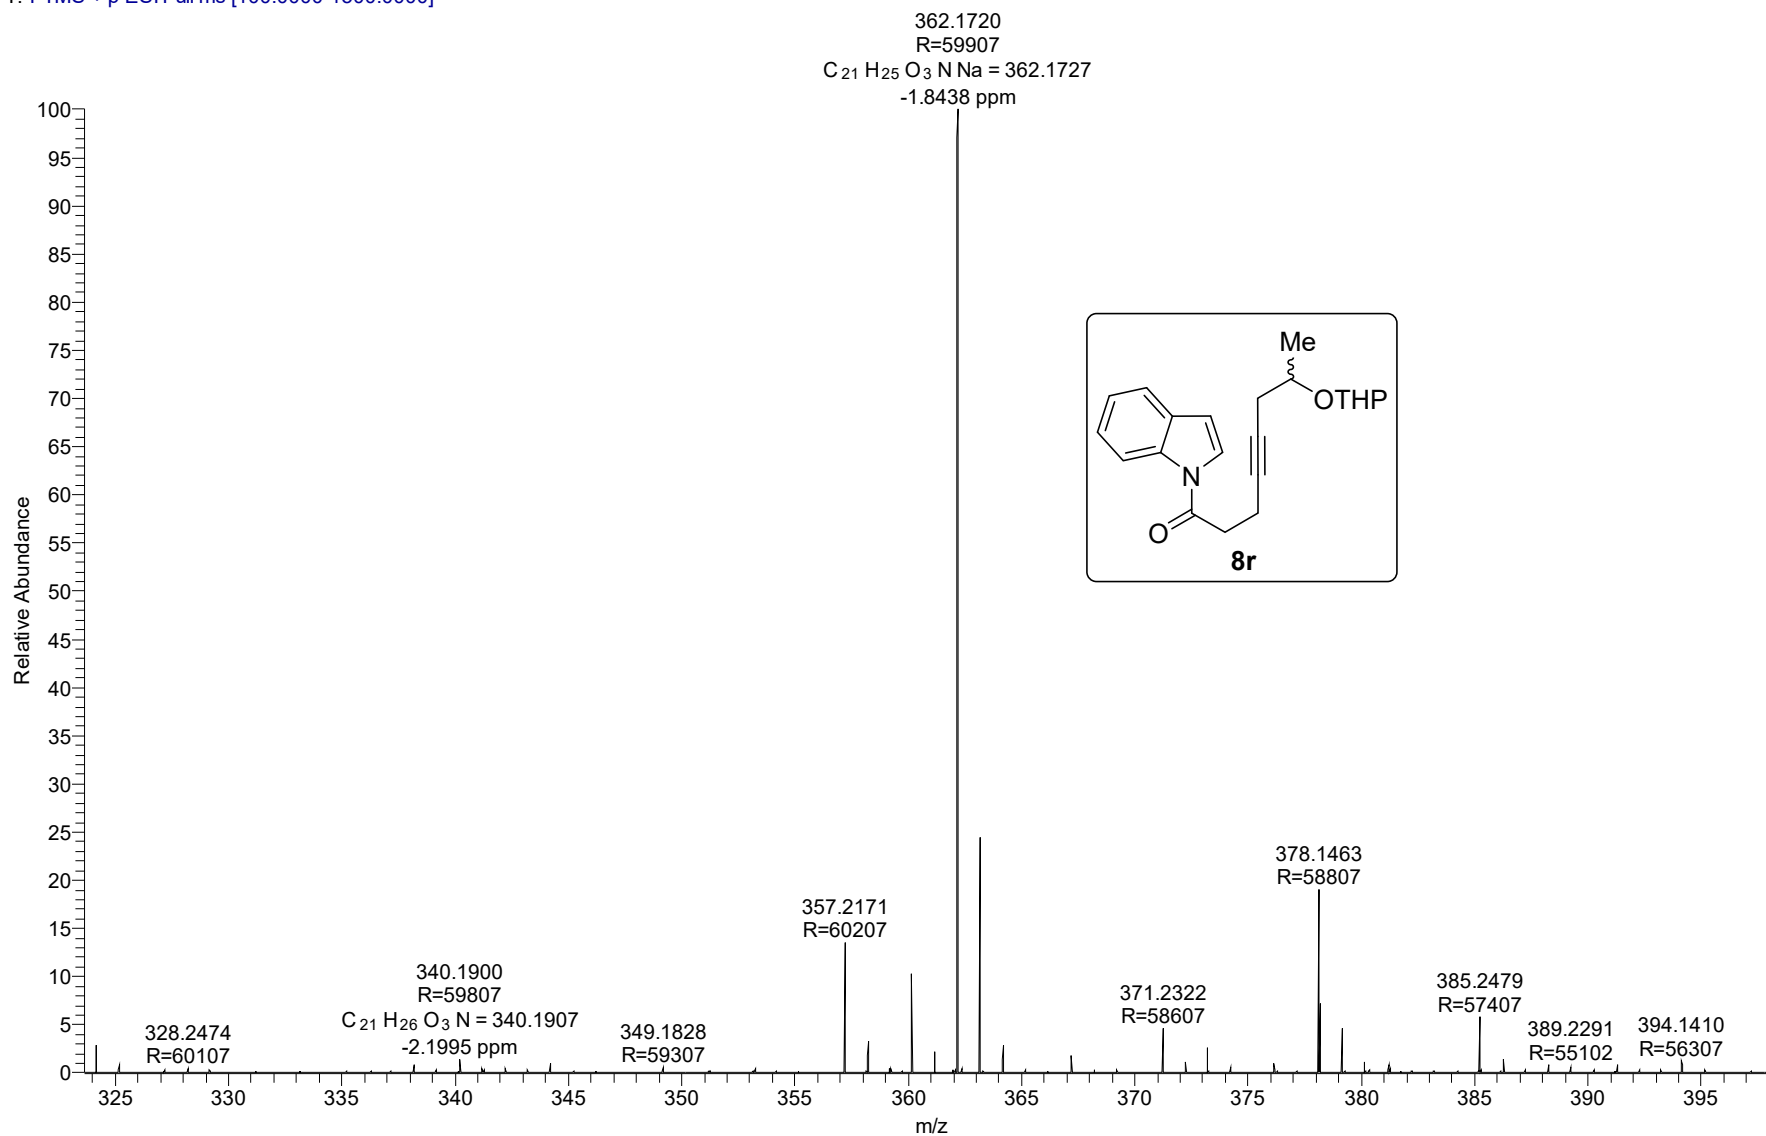

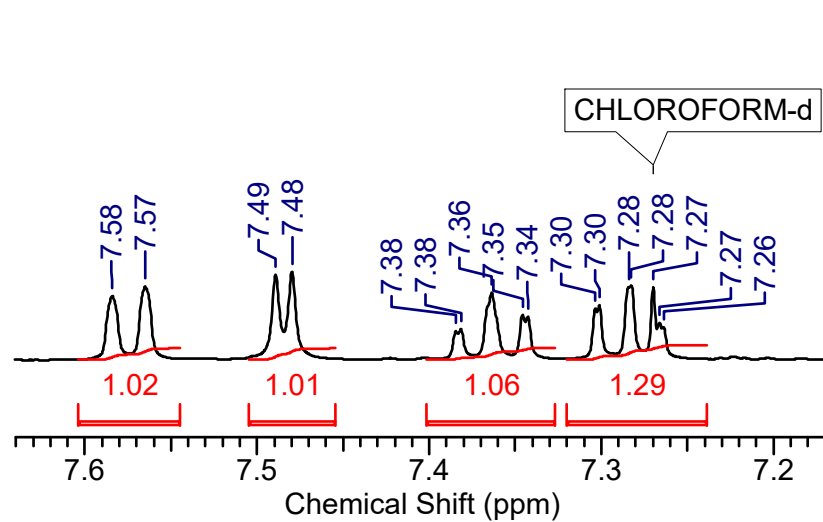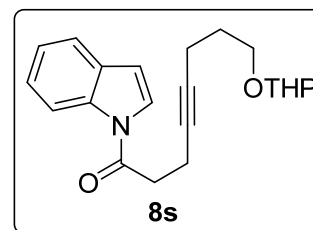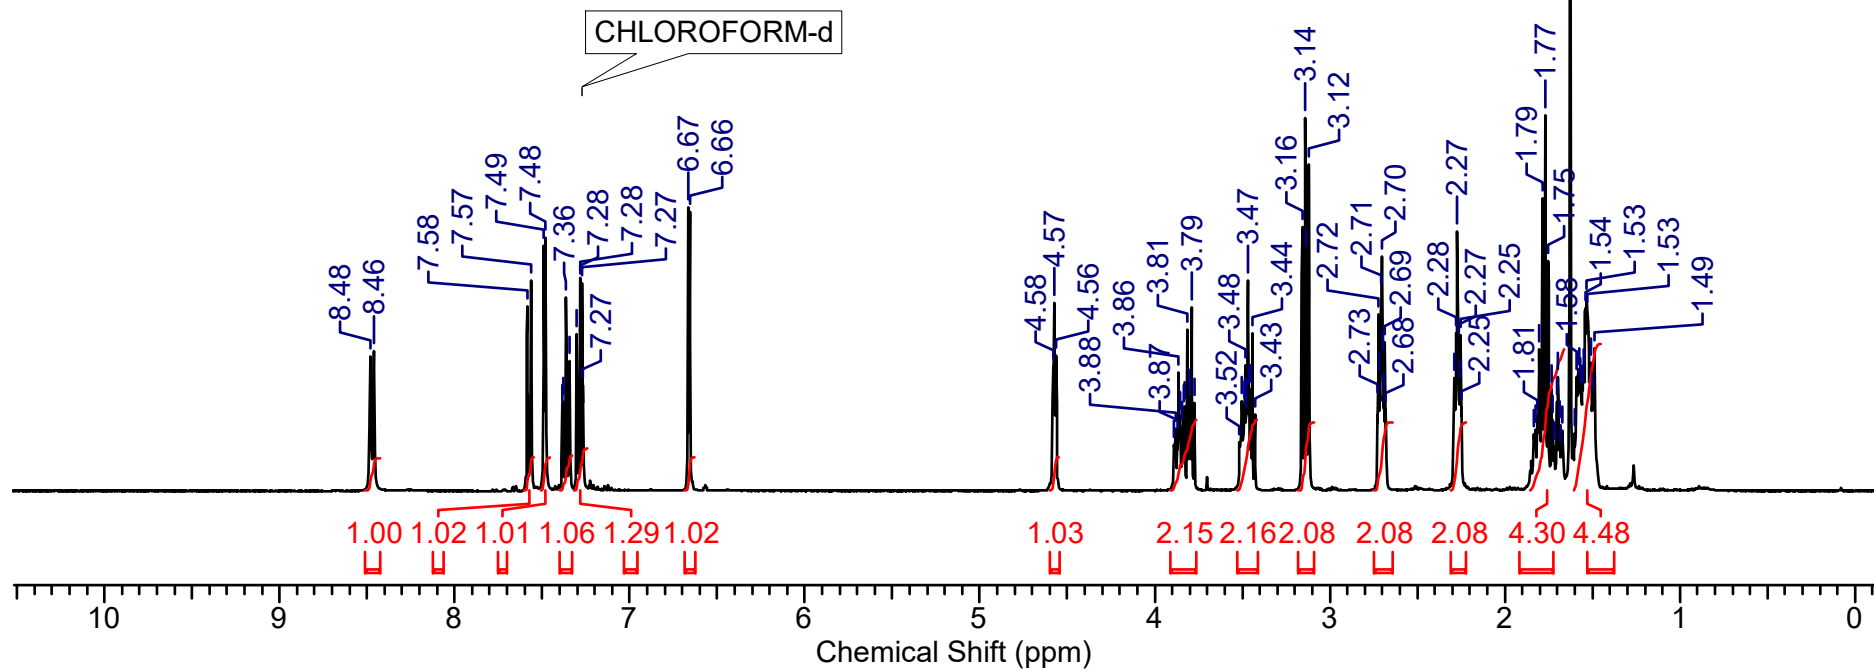

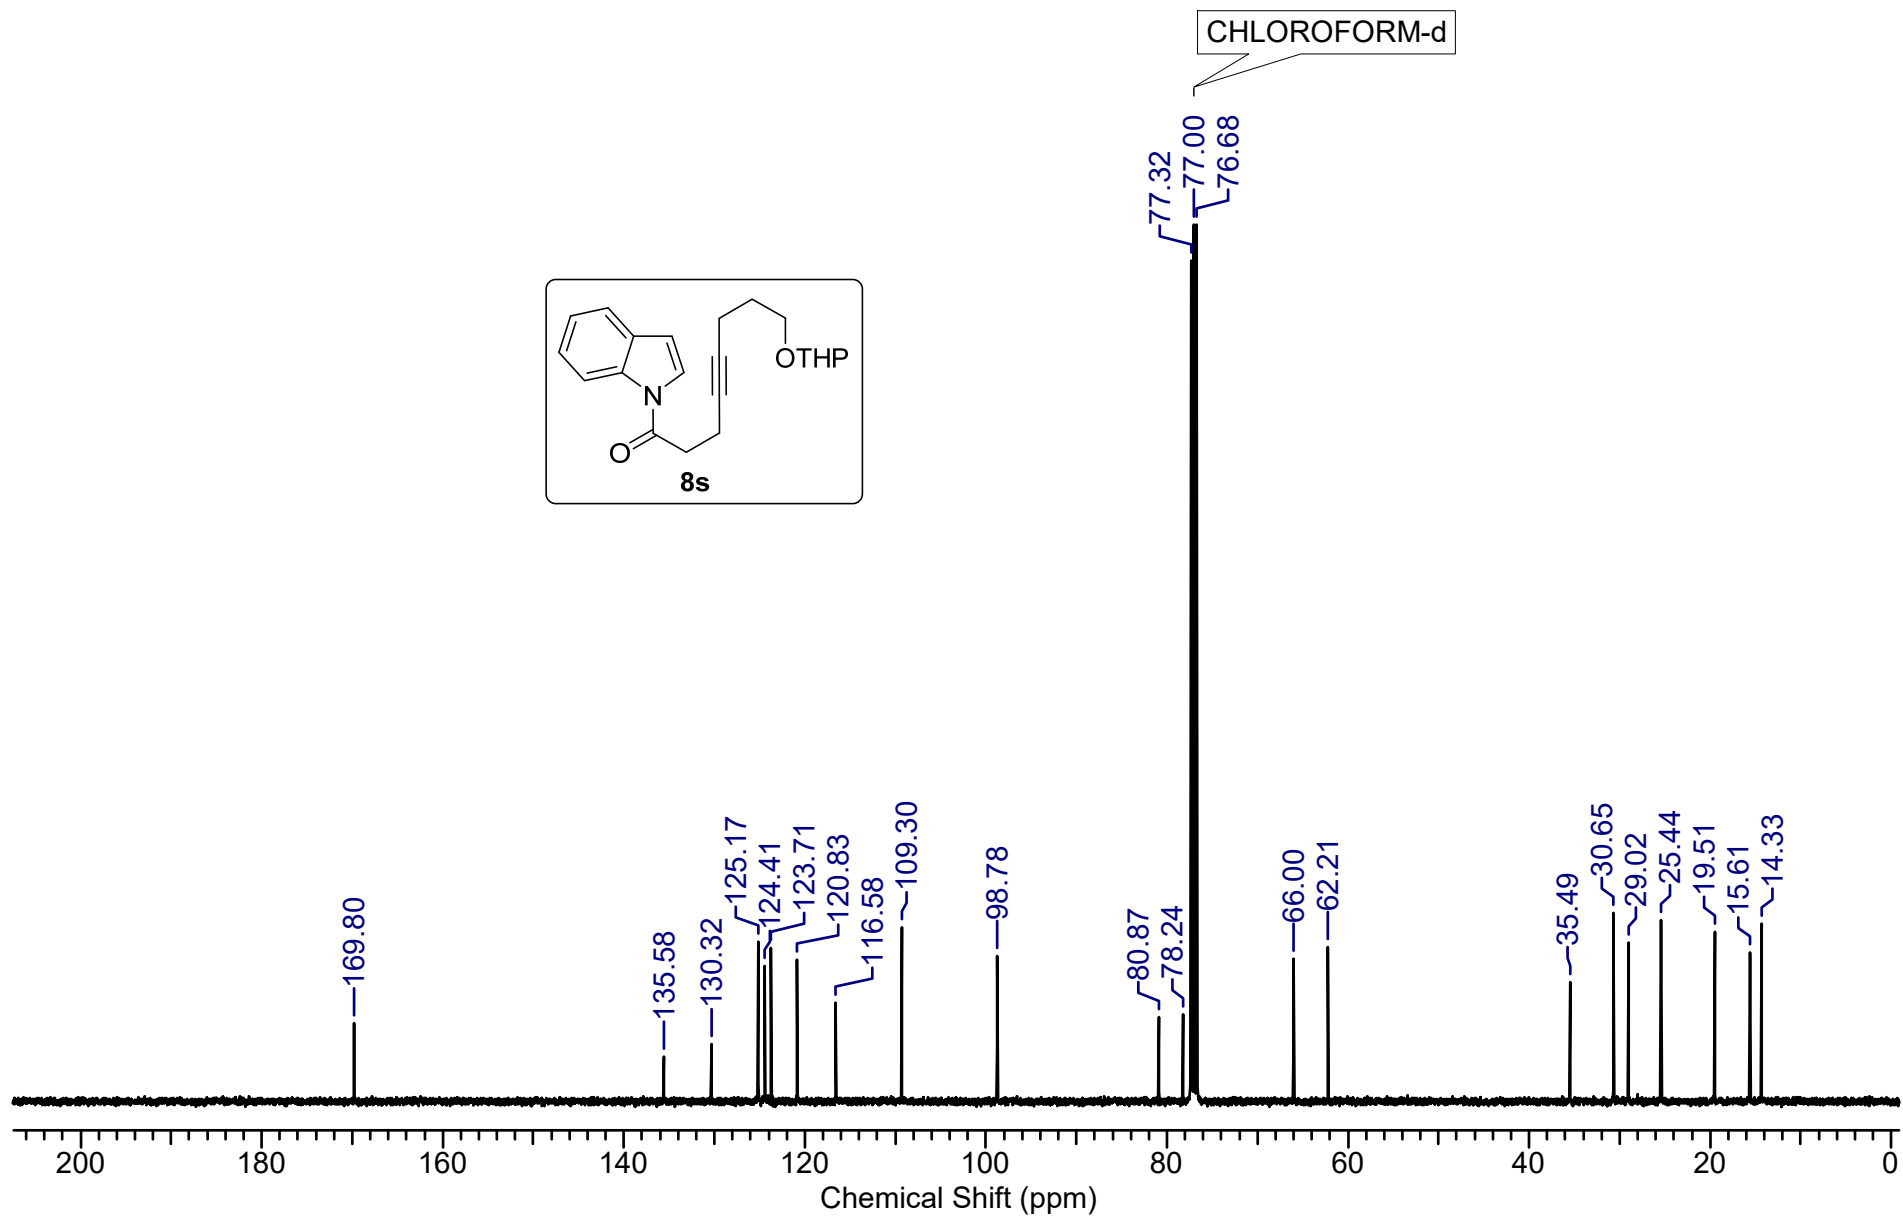

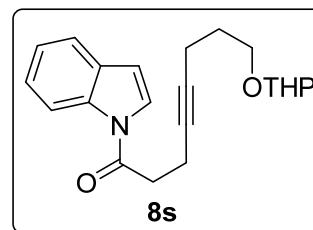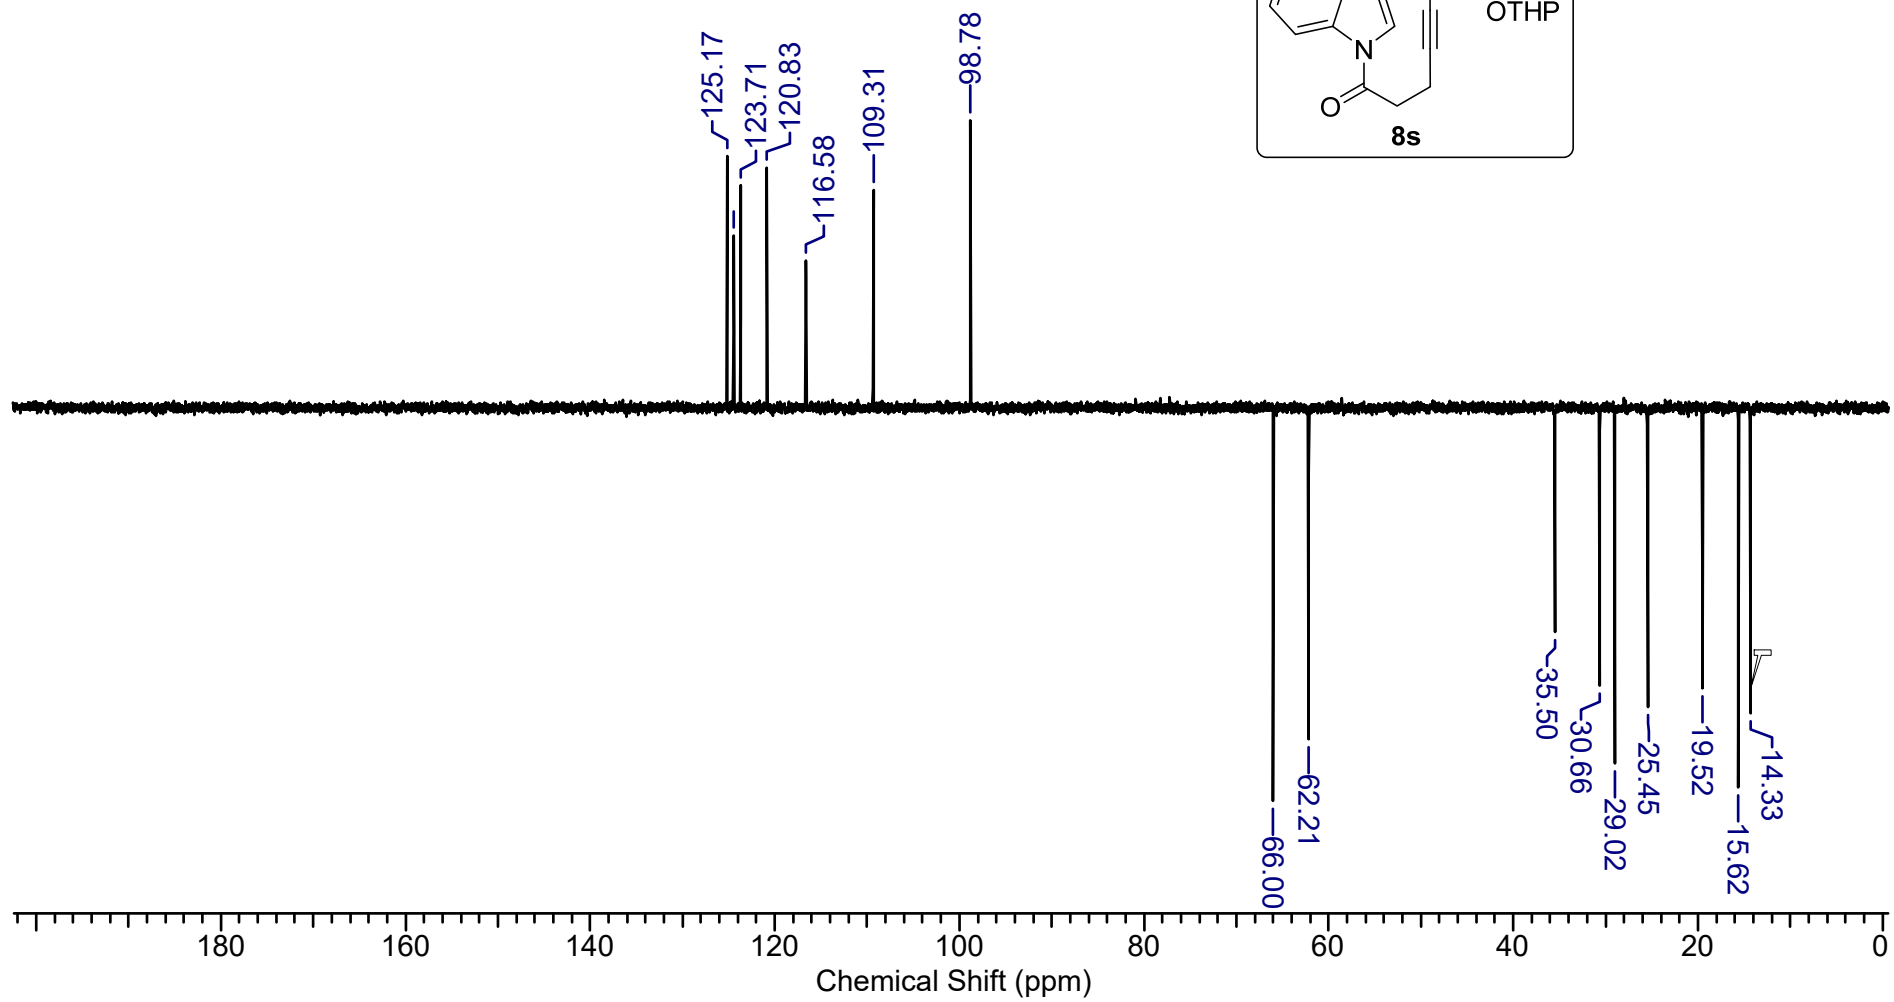



MSH-31 #335 RT: 1.82 AV: 1 NL: 4.36E8  
T: FTMS + p ESI Full ms [100.0000-1500.0000]

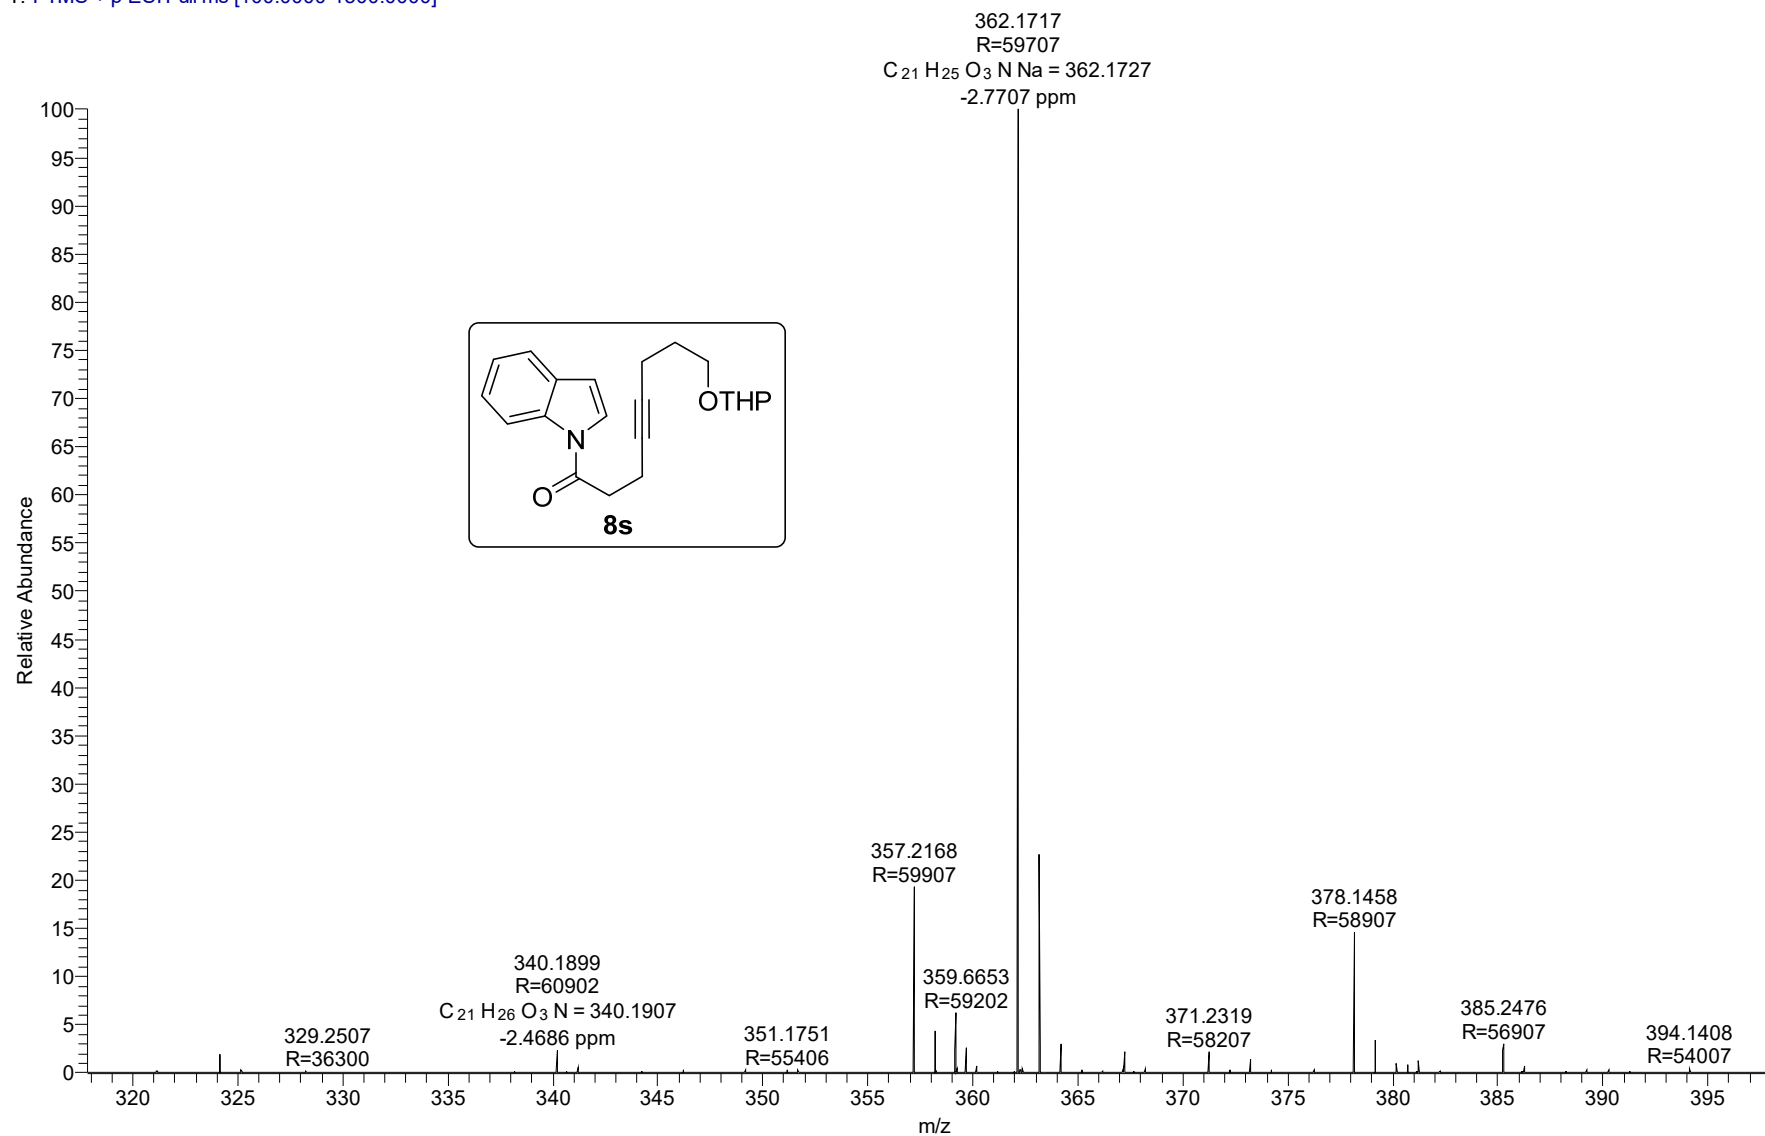

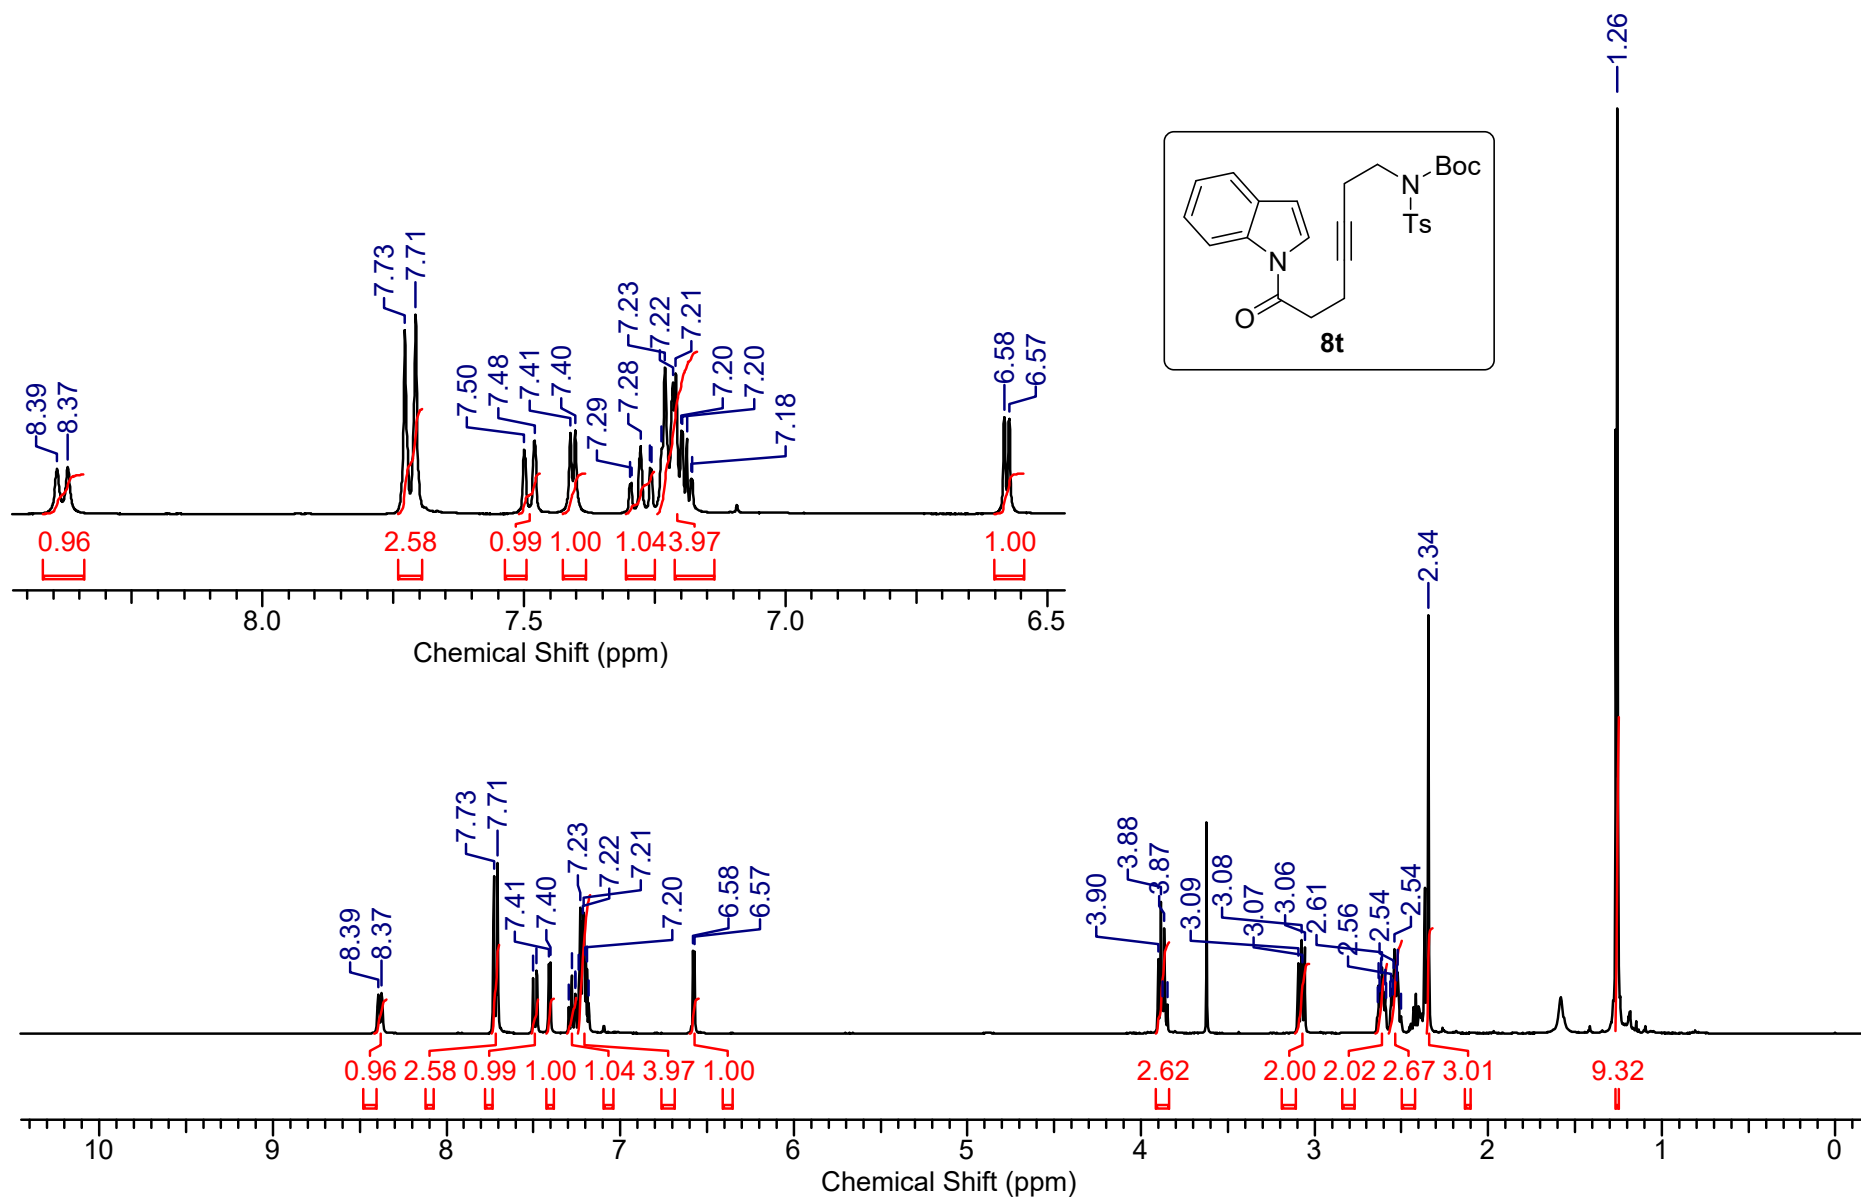

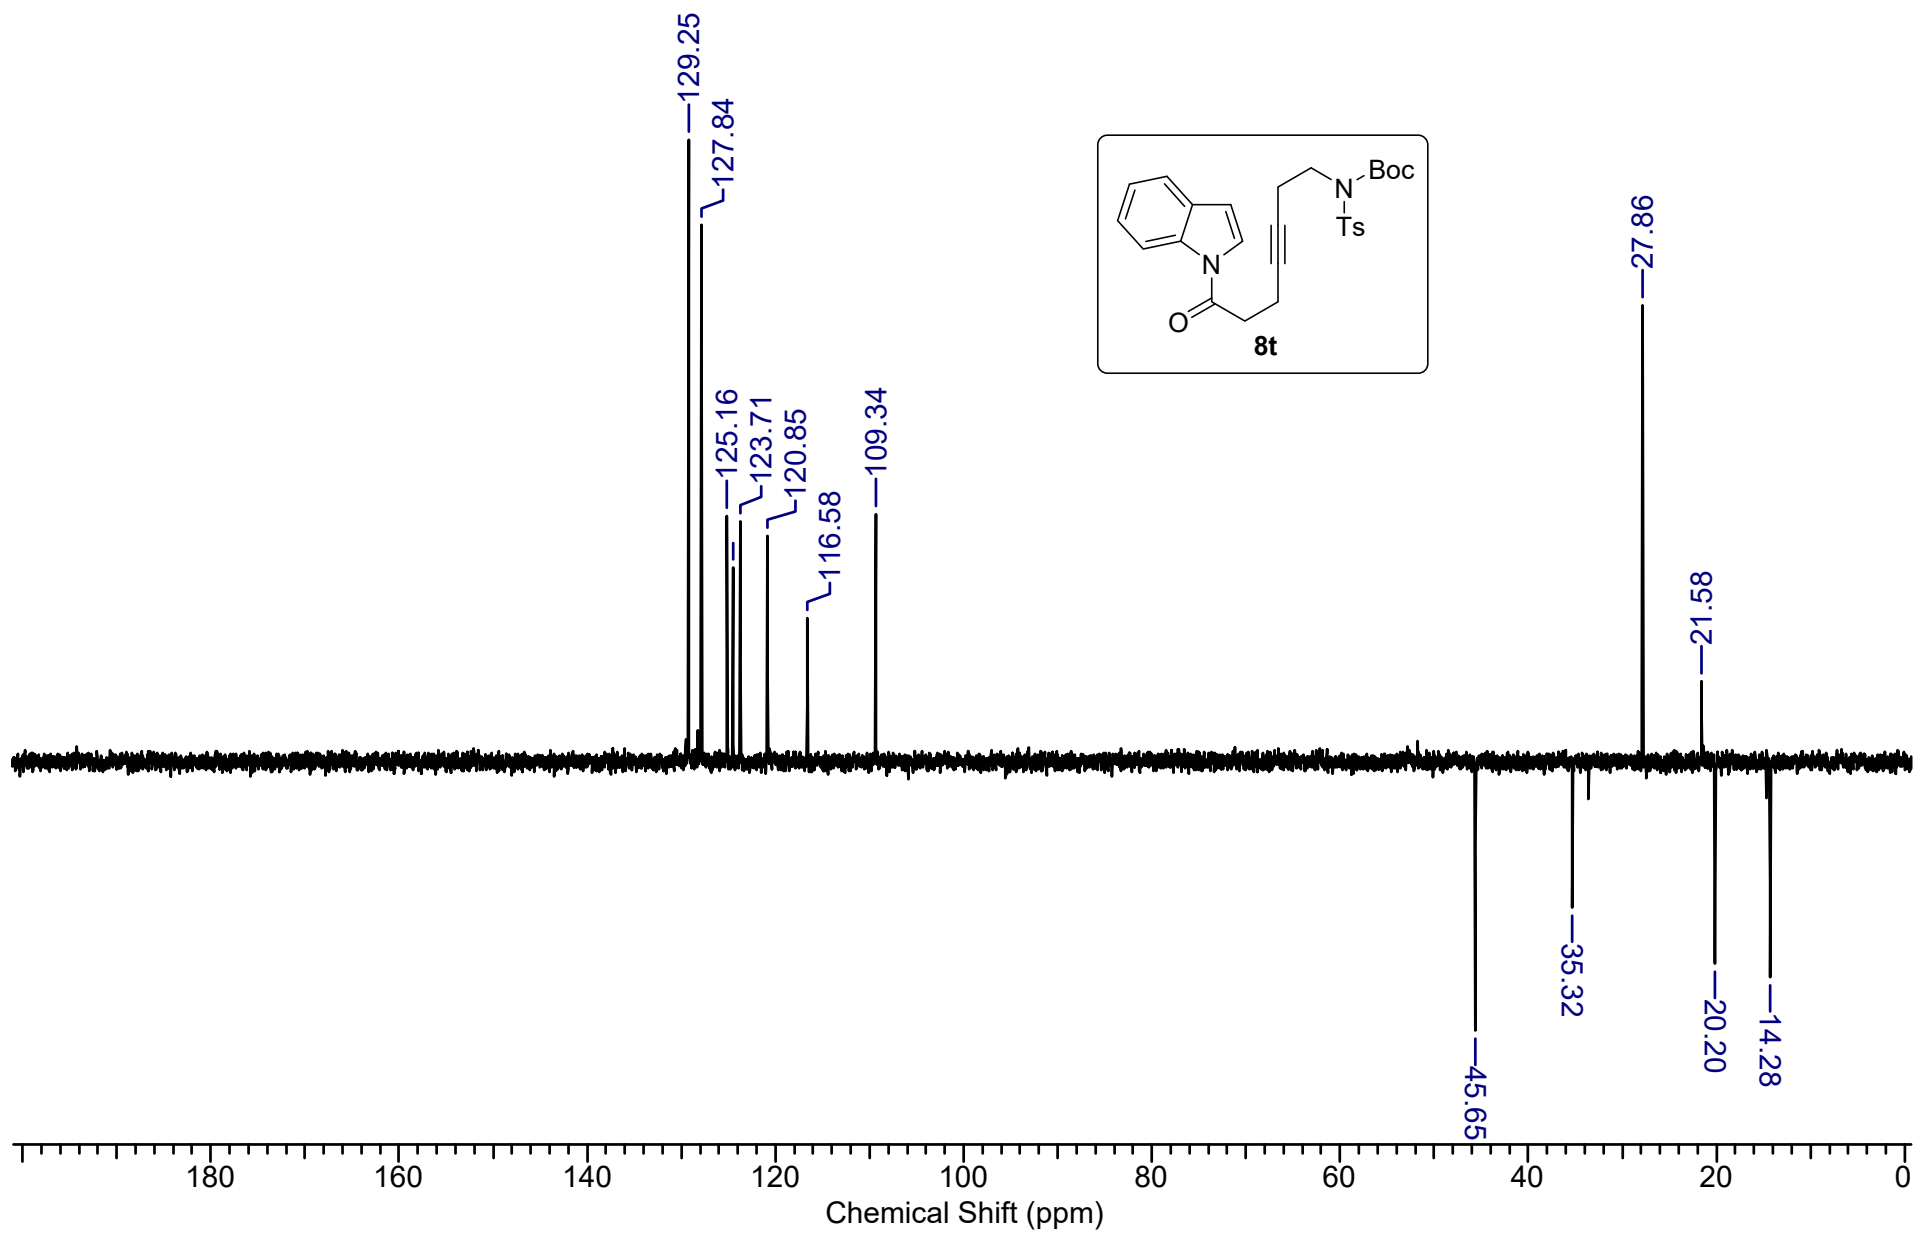

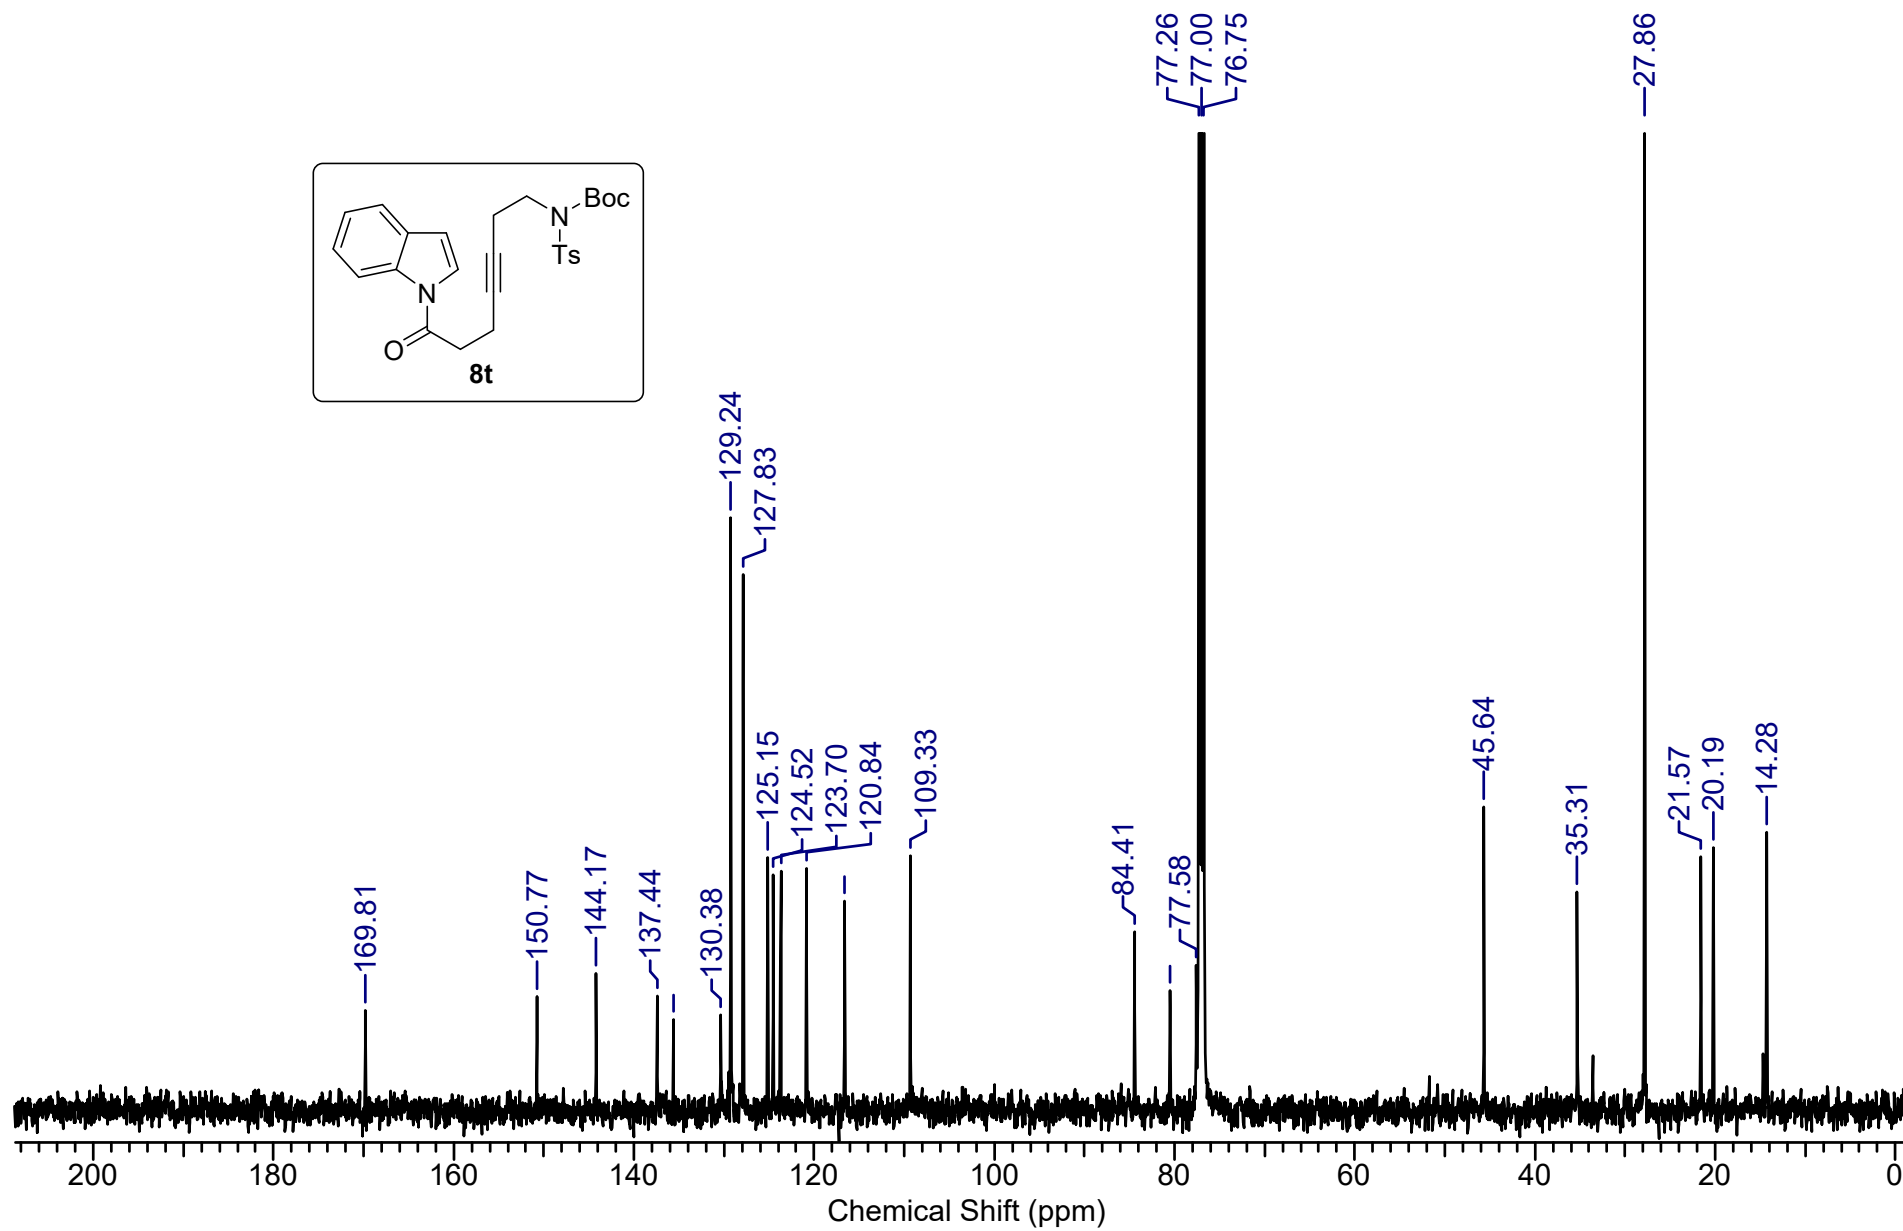

MSH-12 #303 RT: 1.64 AV: 1 NL: 1.45E7  
T: FTMS + p ESI Full ms [100.0000-1500.0000]

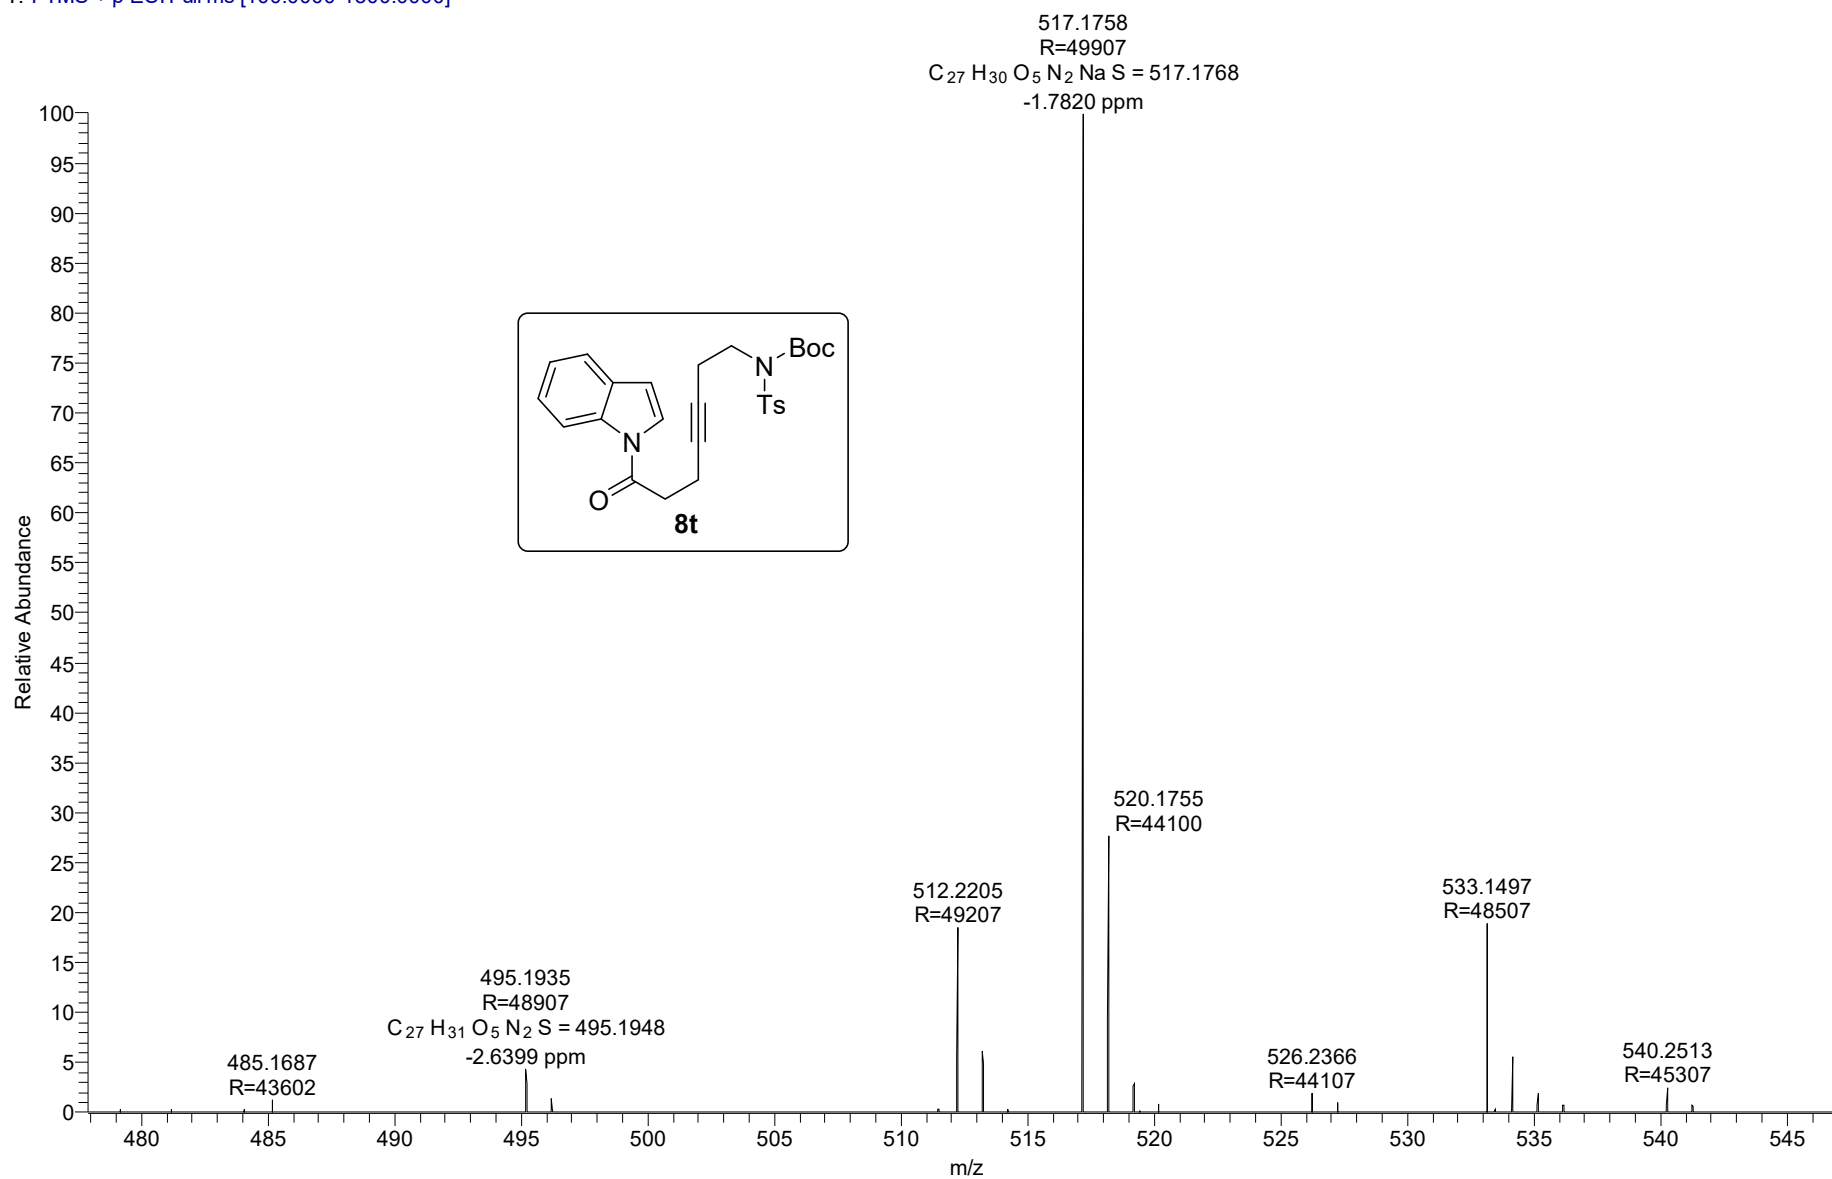

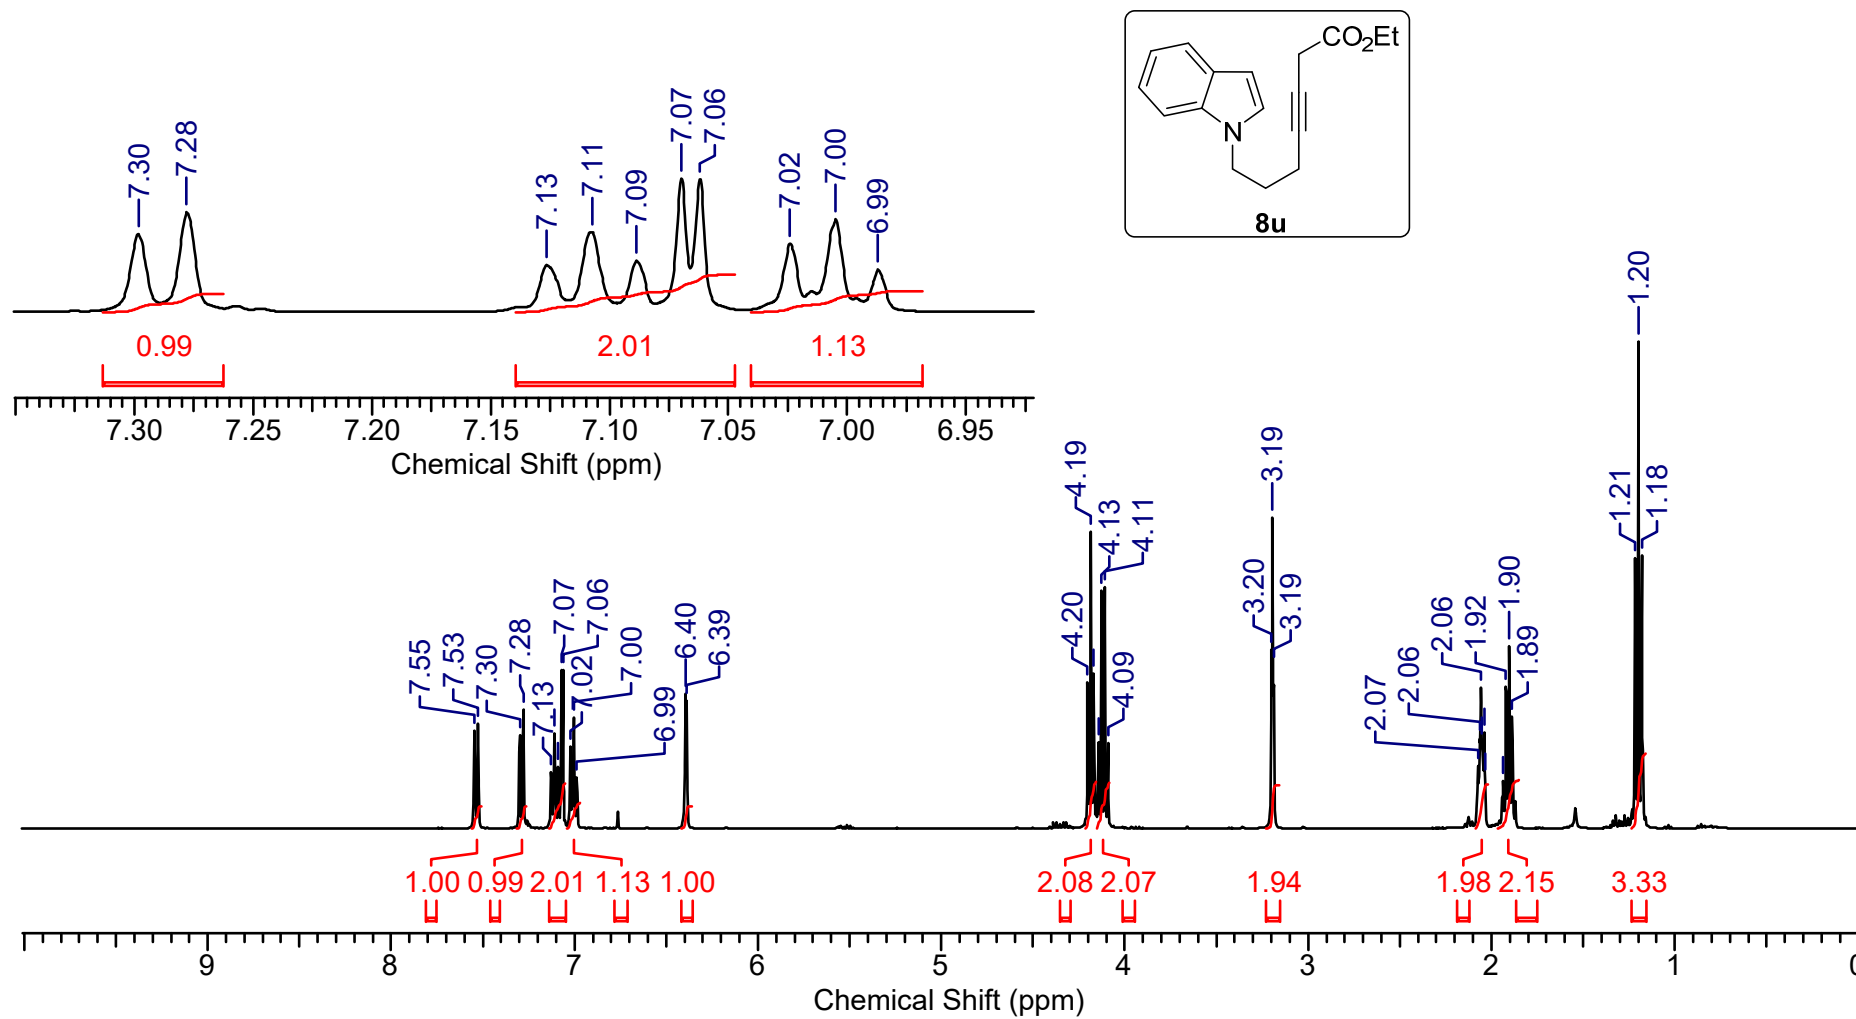

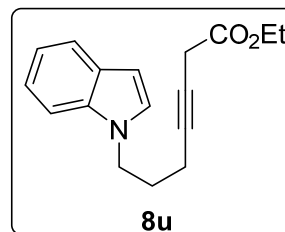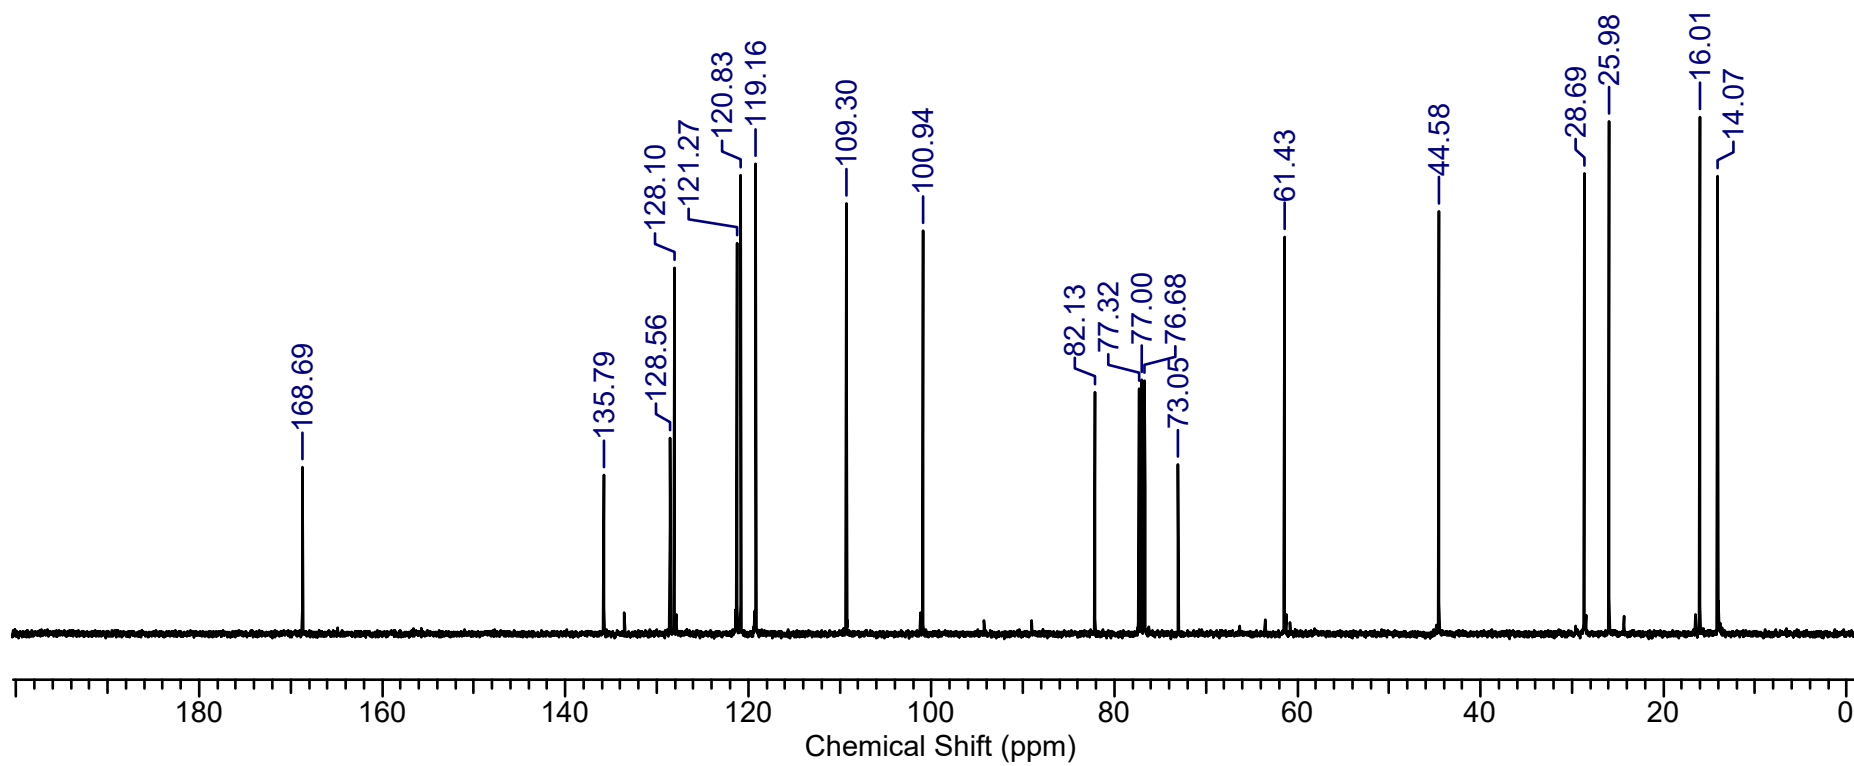

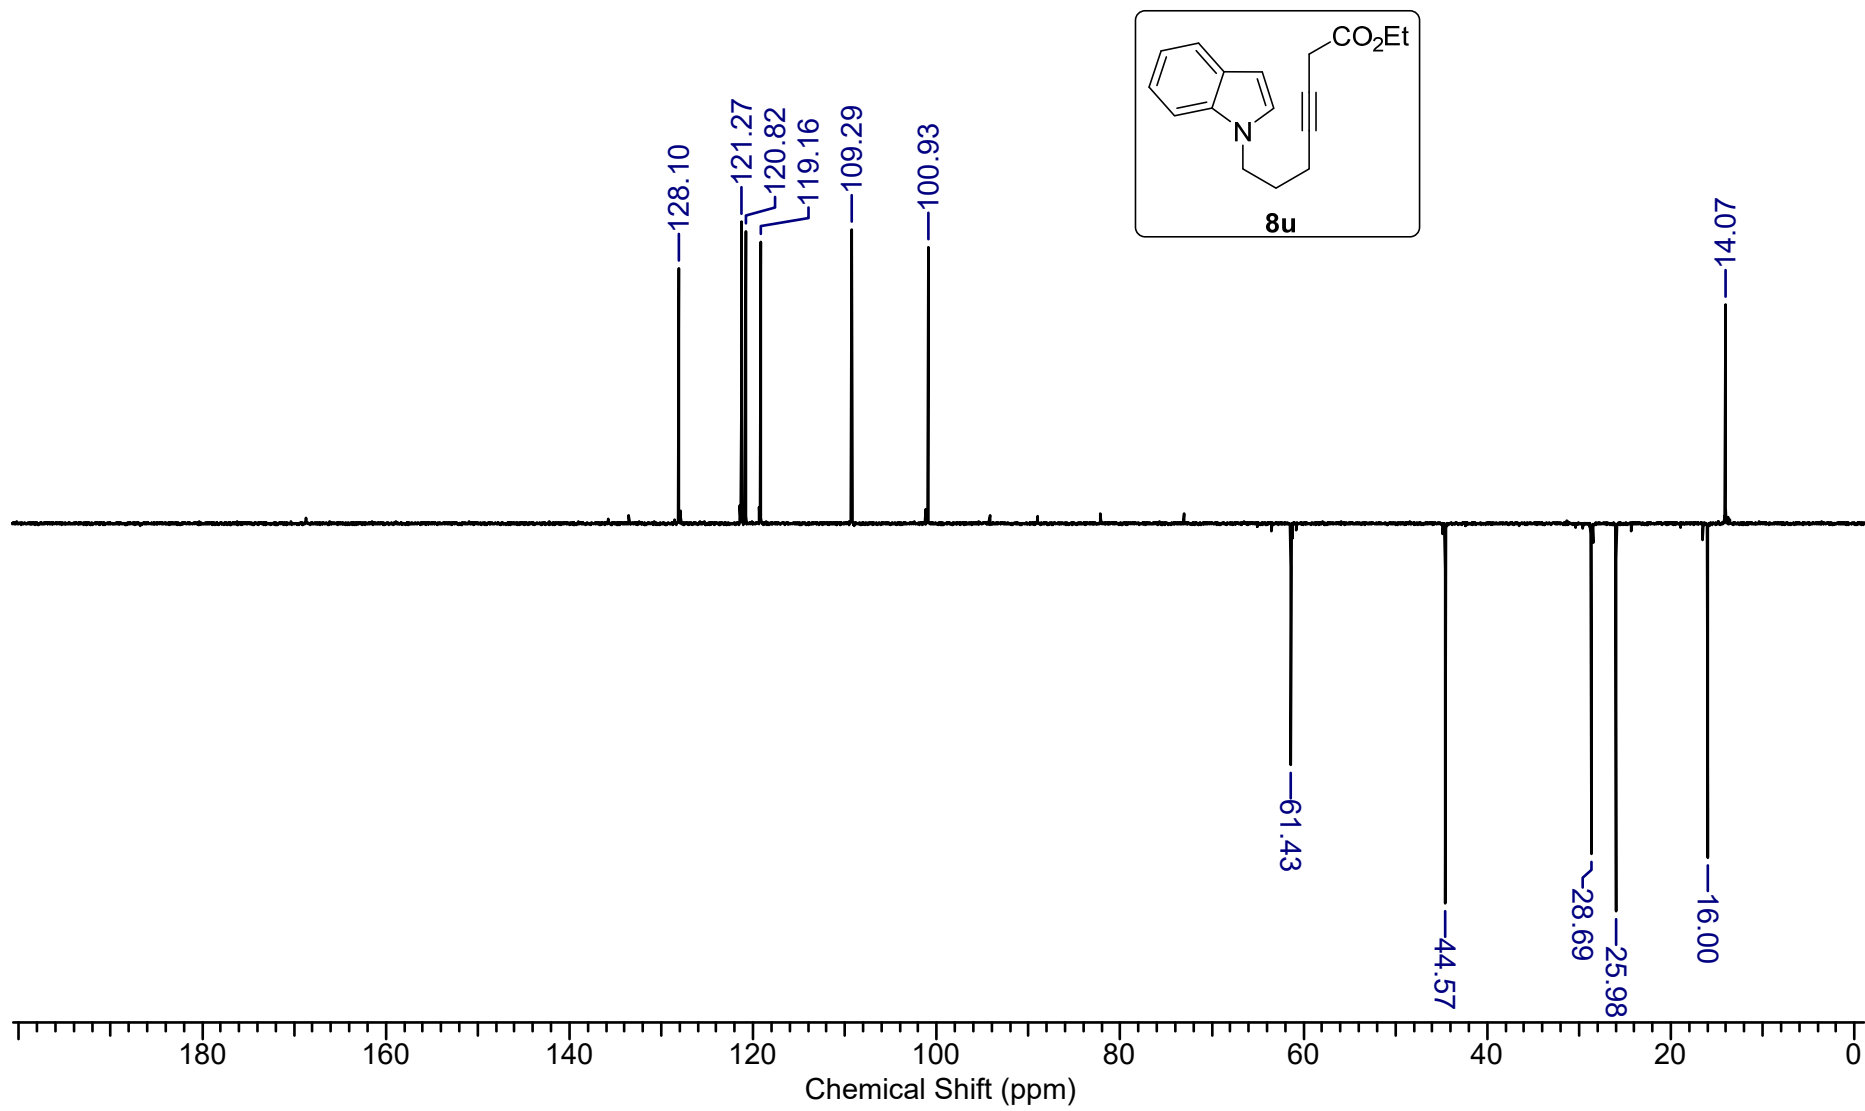



MSH-46 #299 RT: 1.63 AV: 1 NL: 2.63E9  
T: FTMS + p ESI Full ms [100.0000-1500.0000]

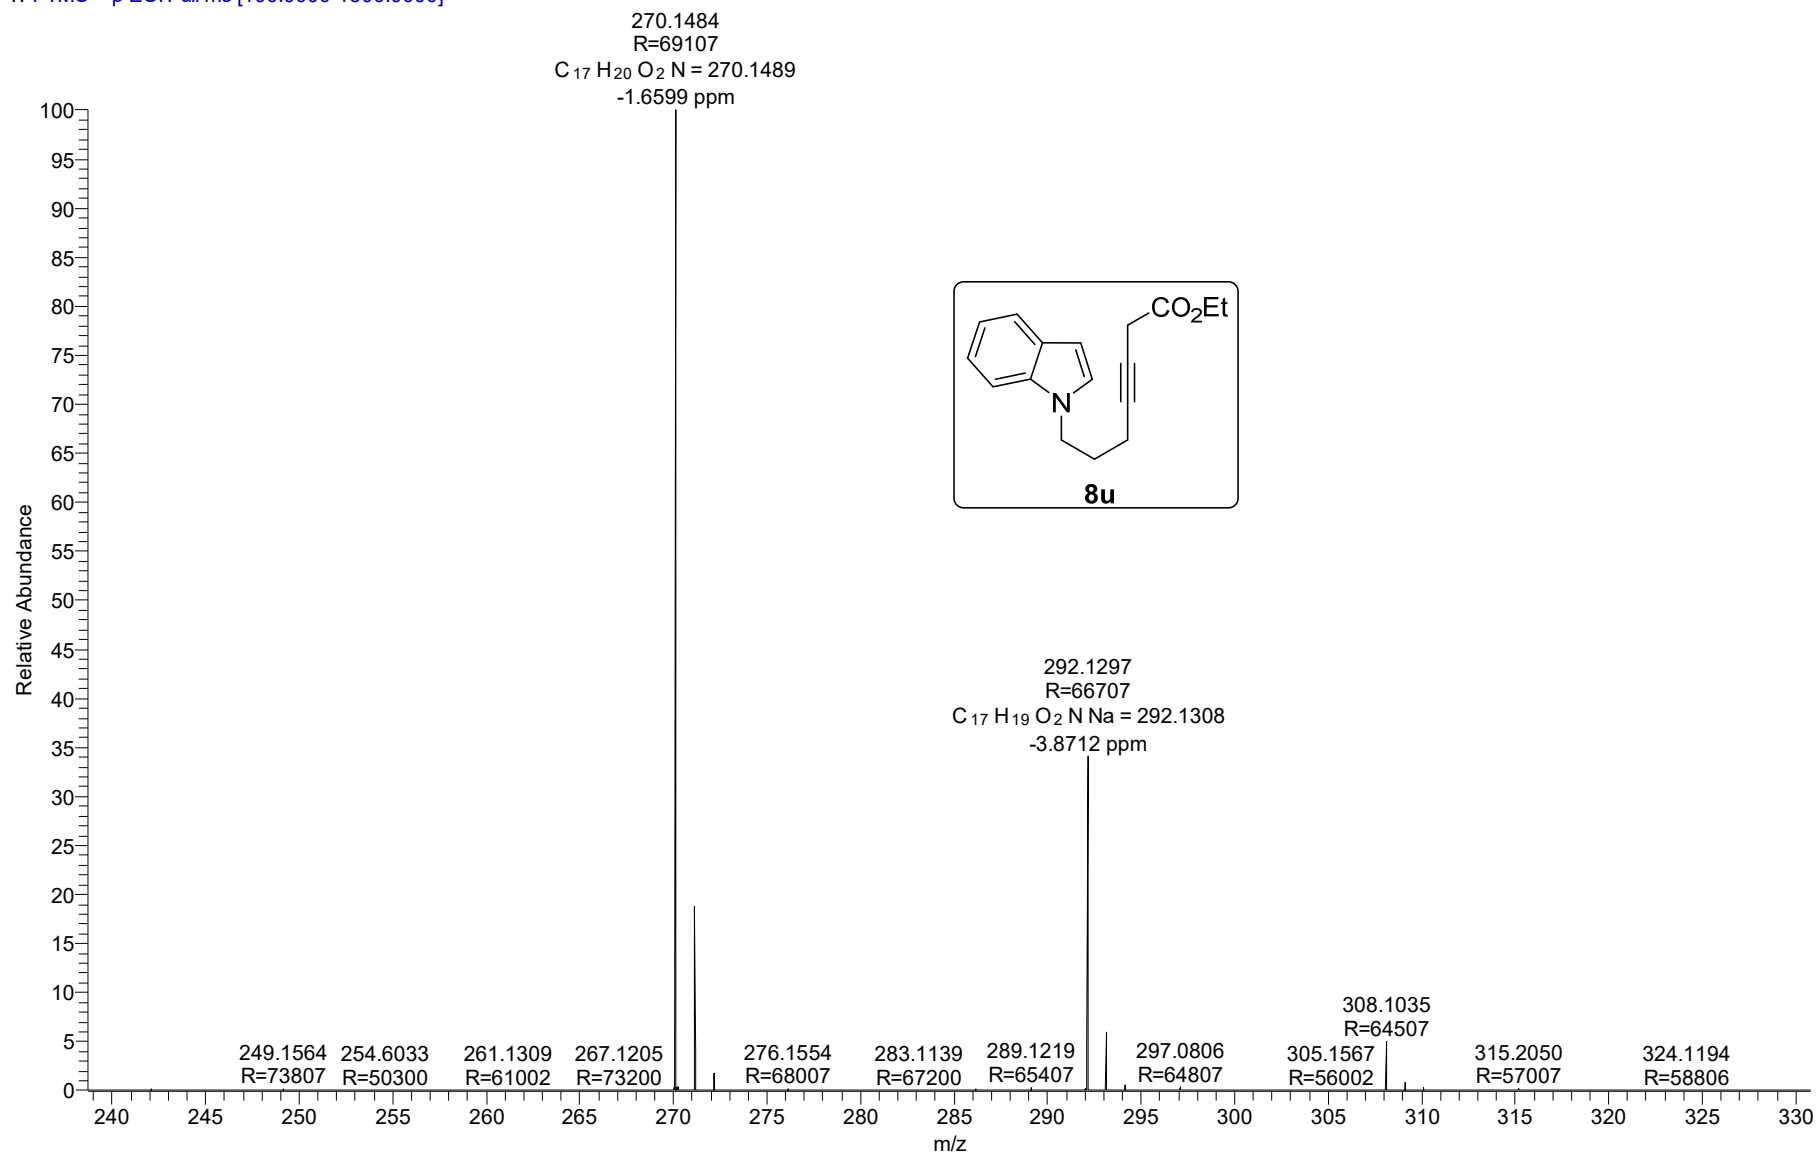

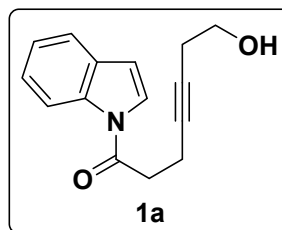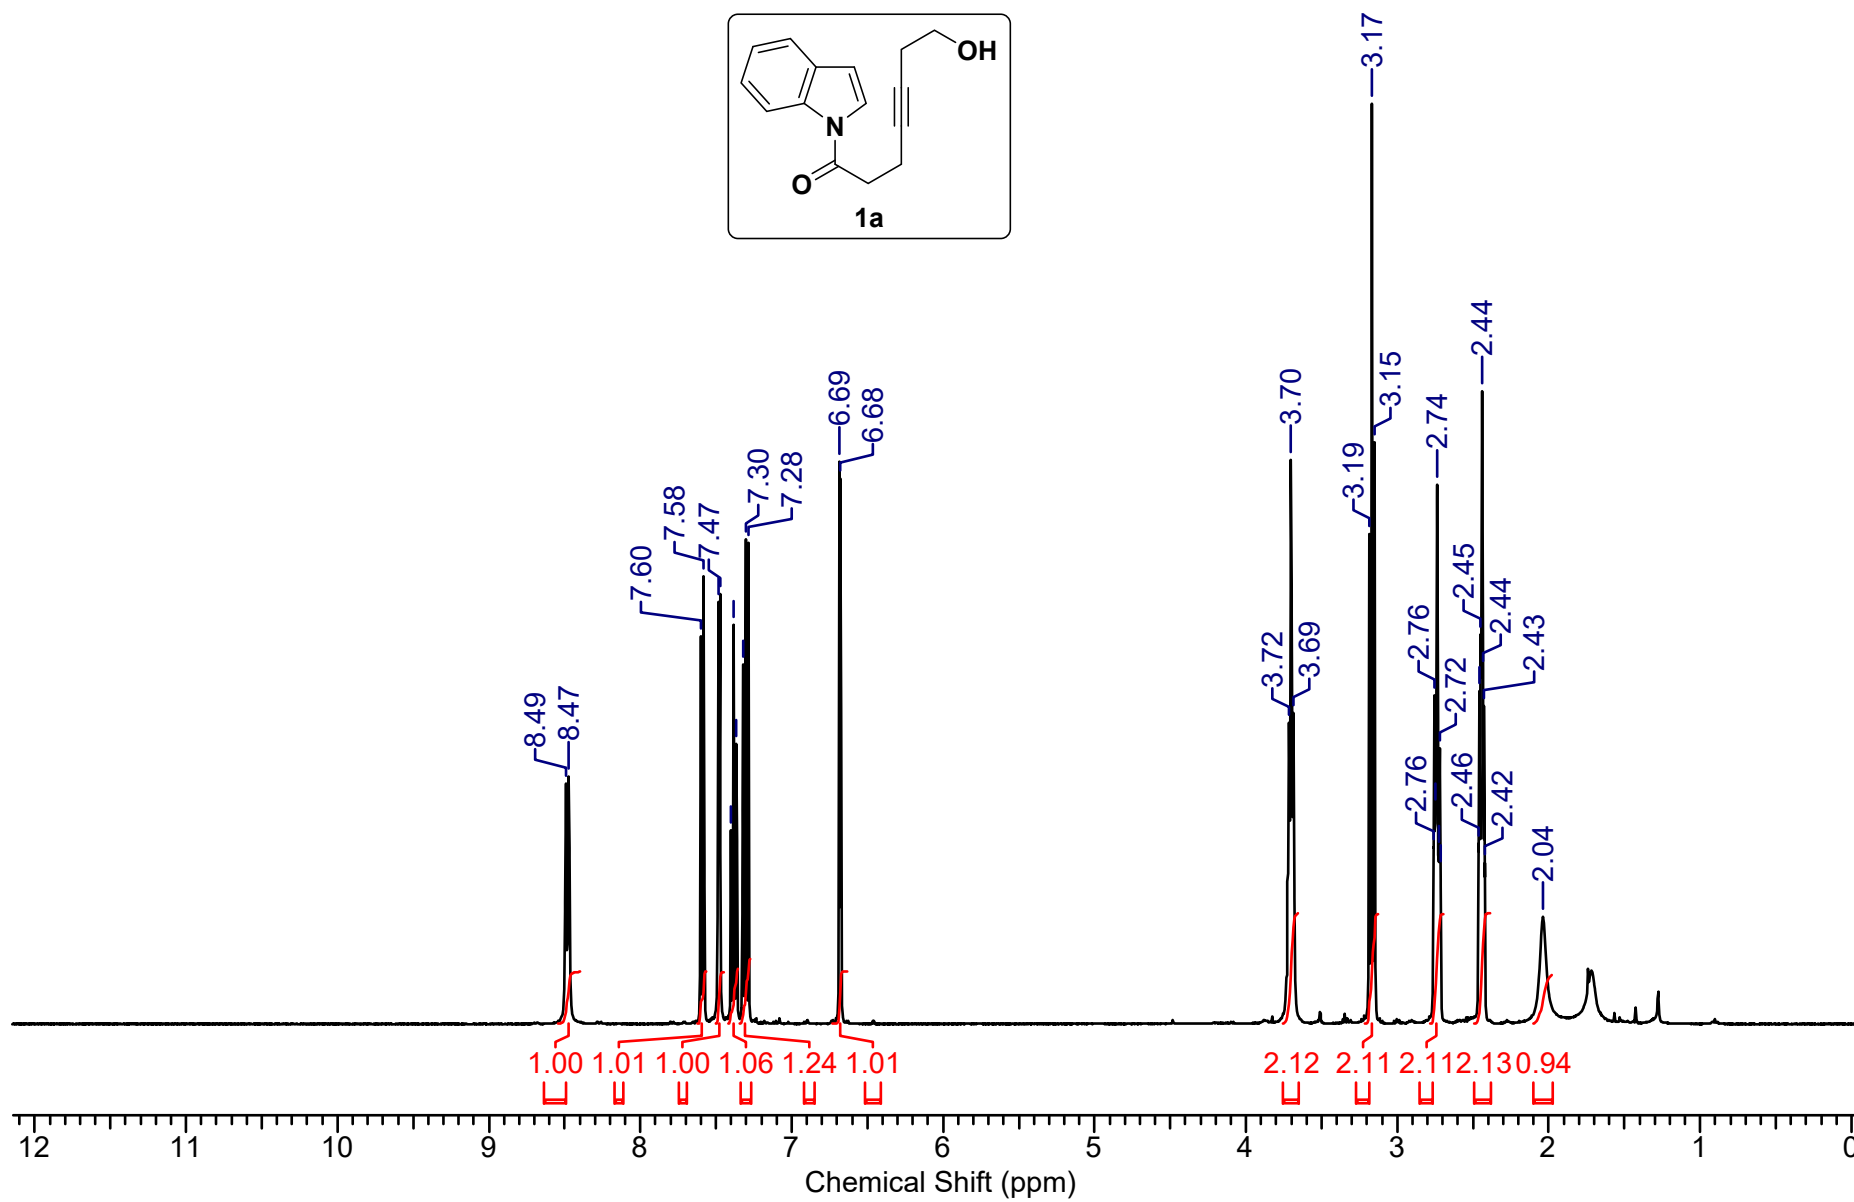

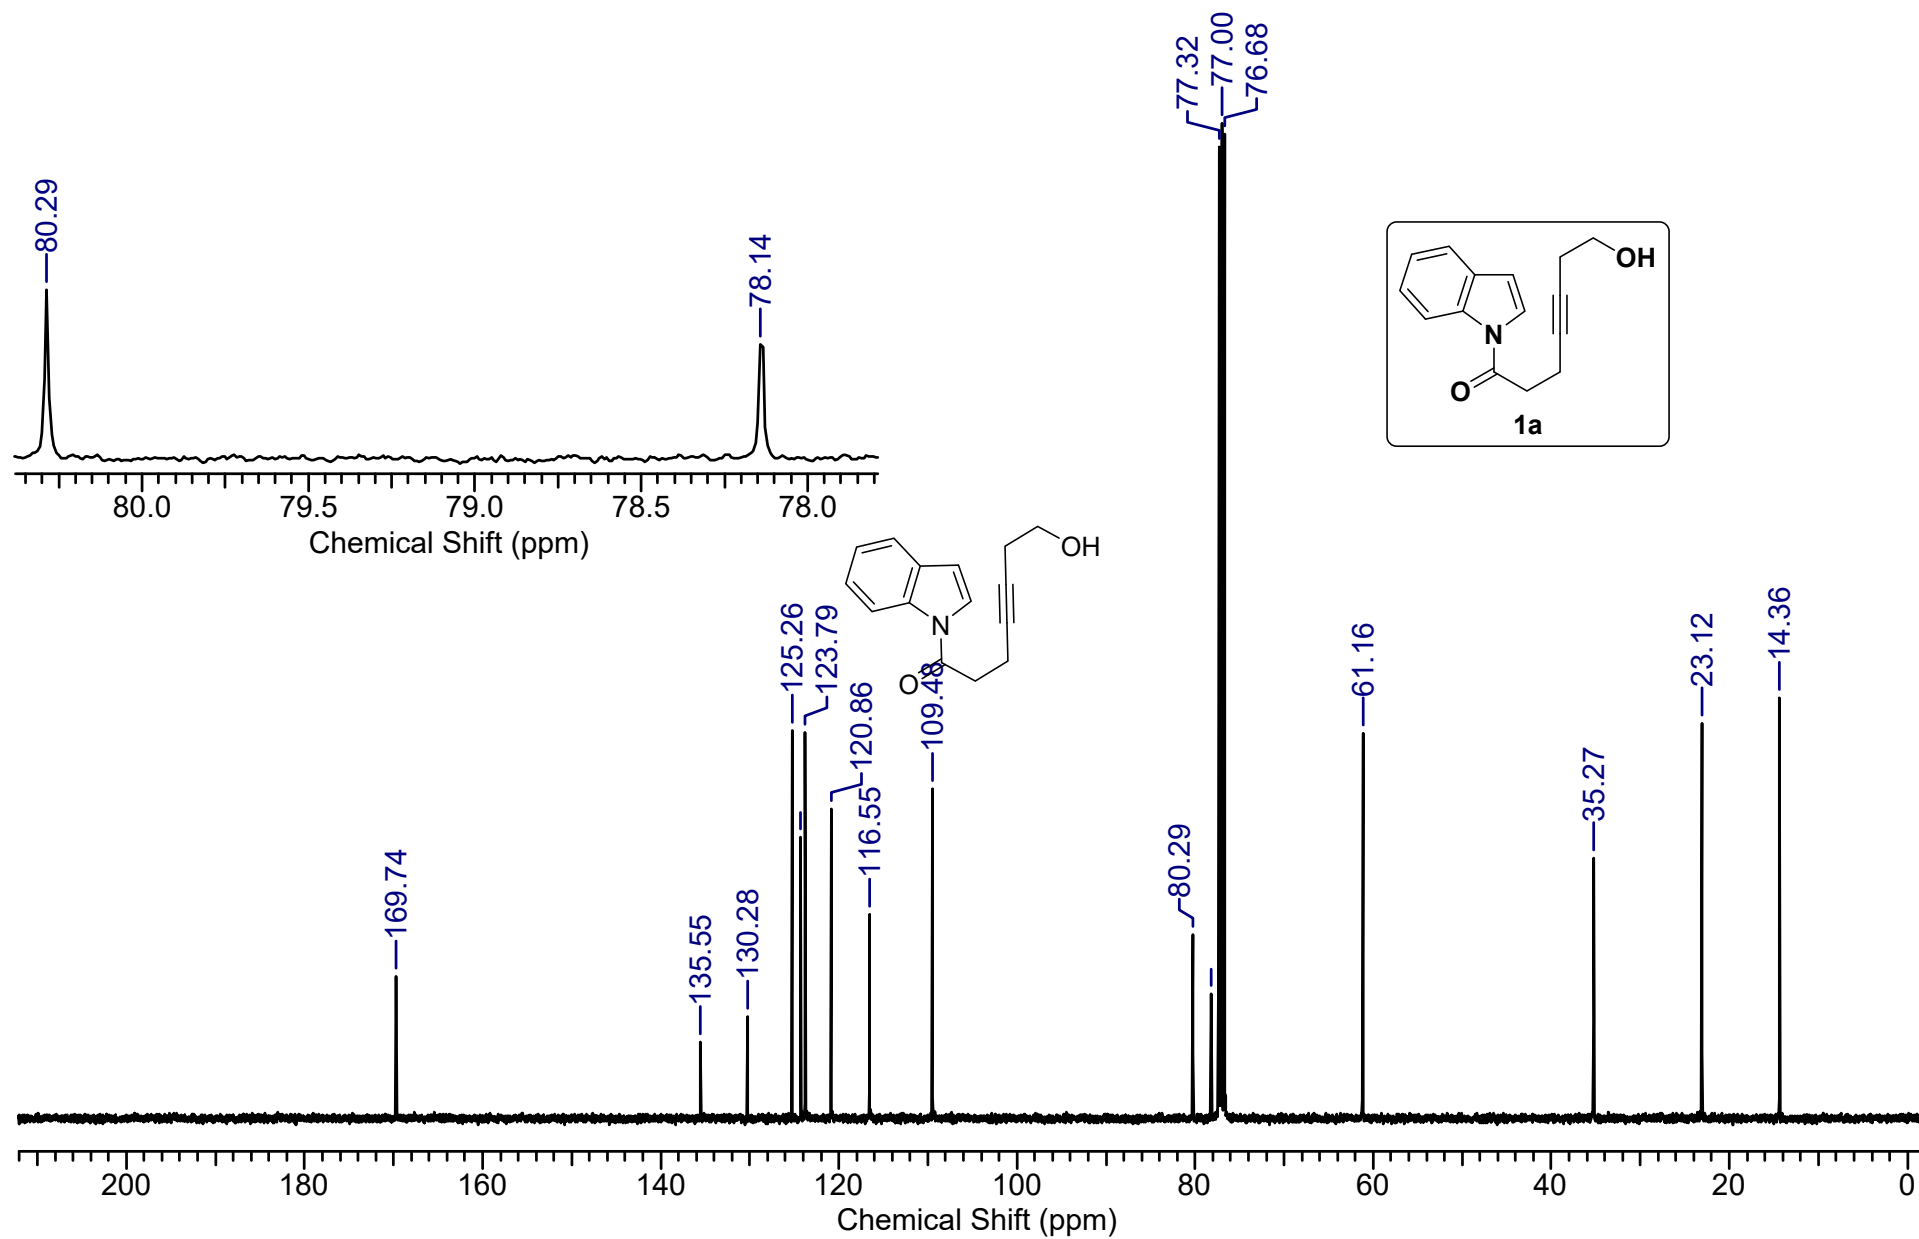

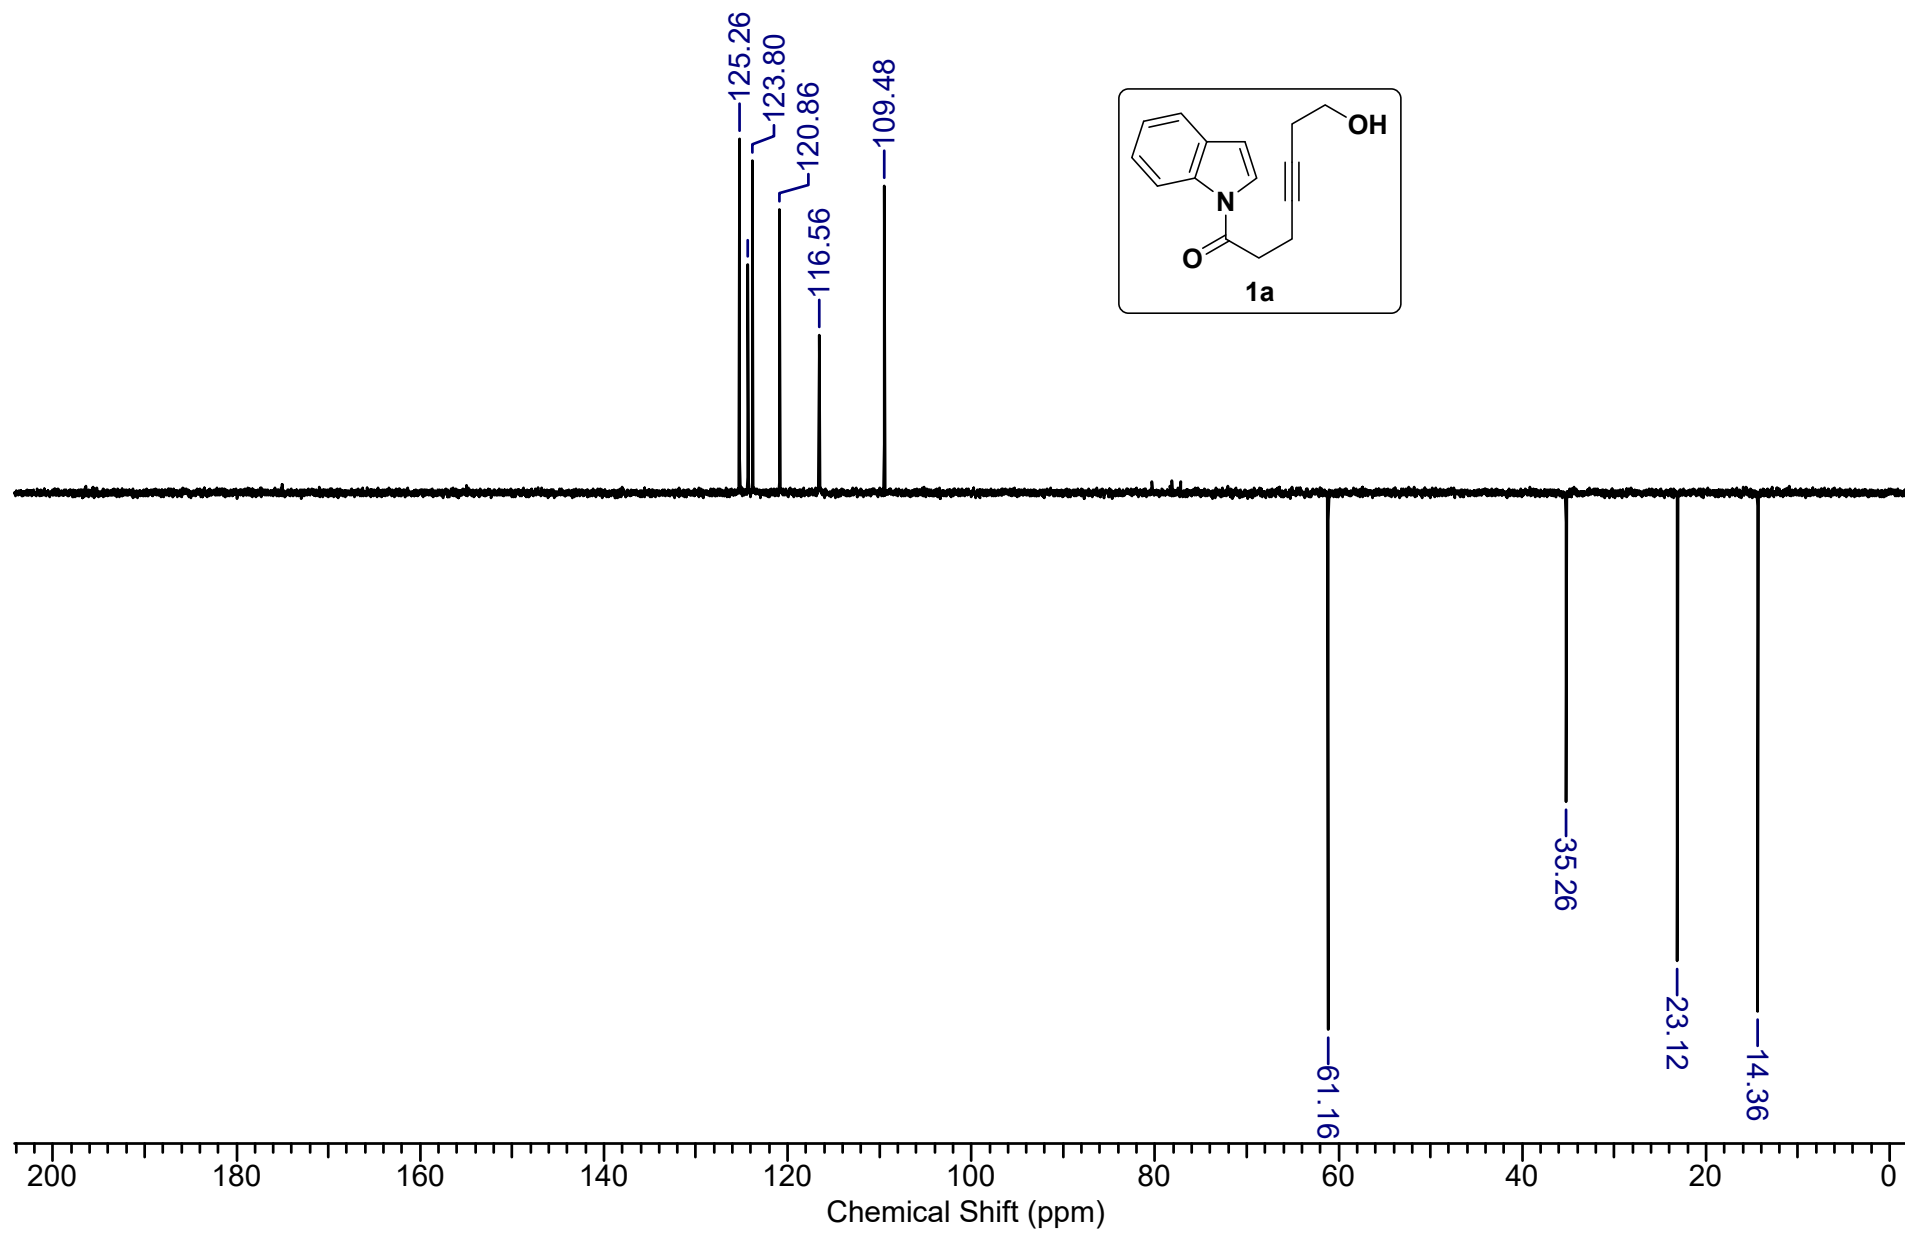

M-6 #445 RT: 2.62 AV: 1 NL: 1.34E9  
T: FTMS + p ESI Full ms [100.0000-1500.0000]

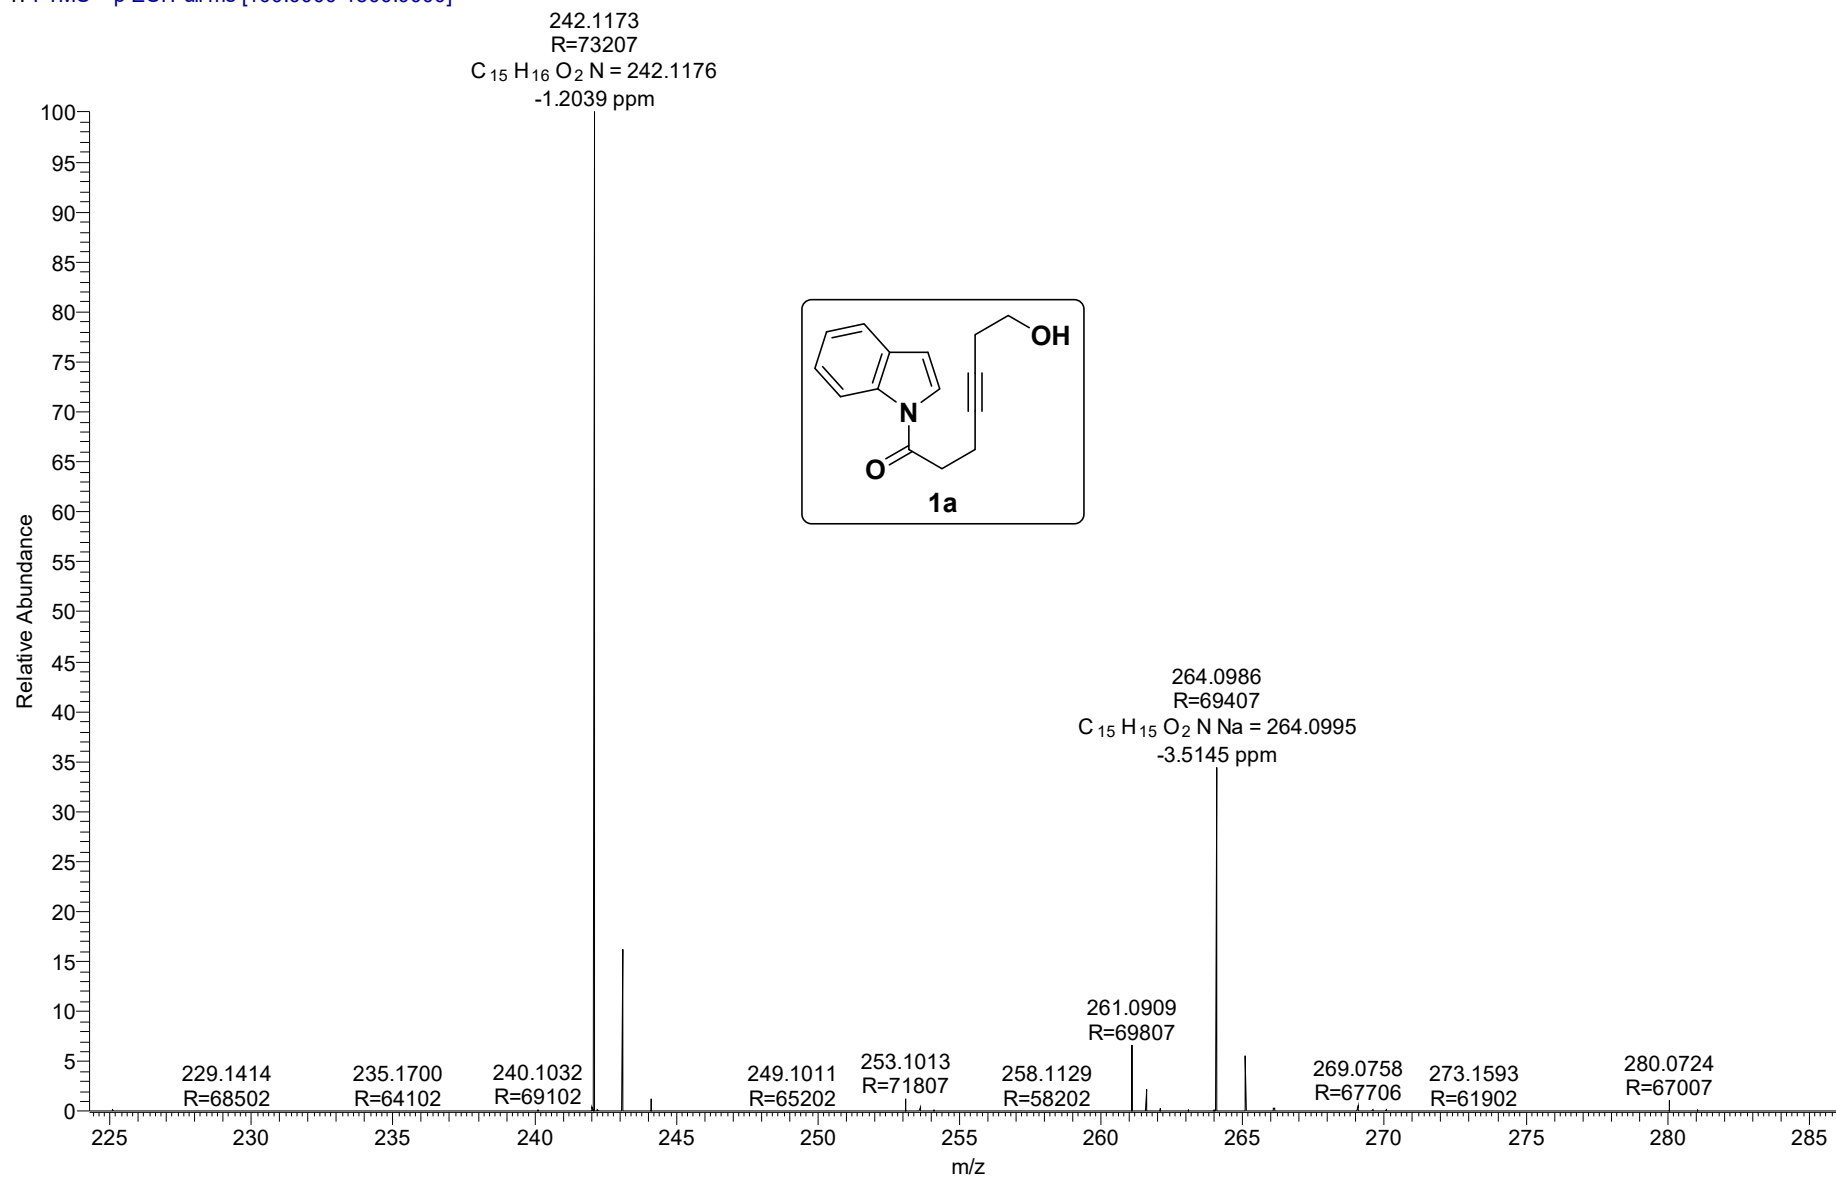

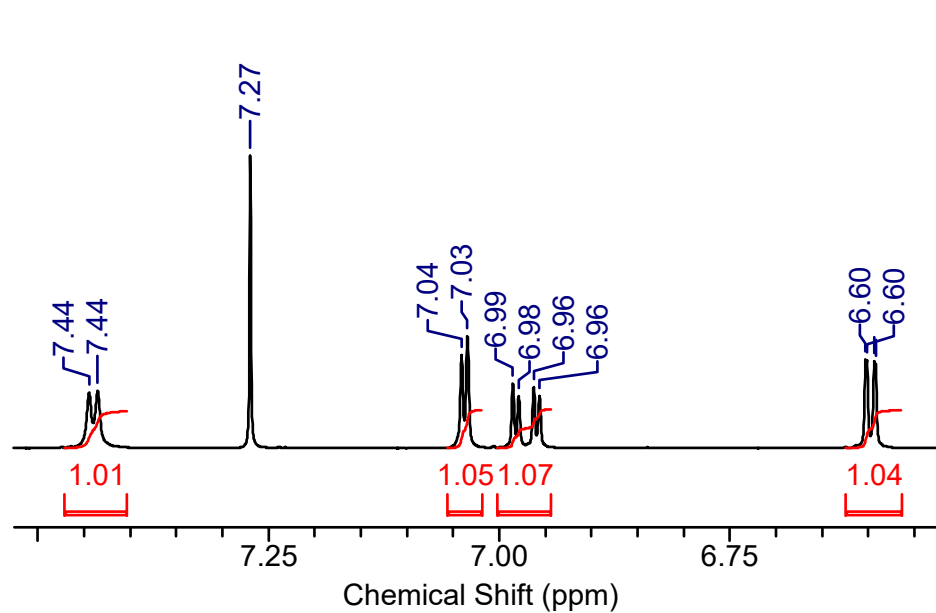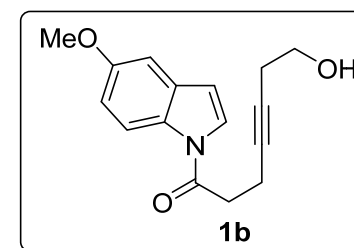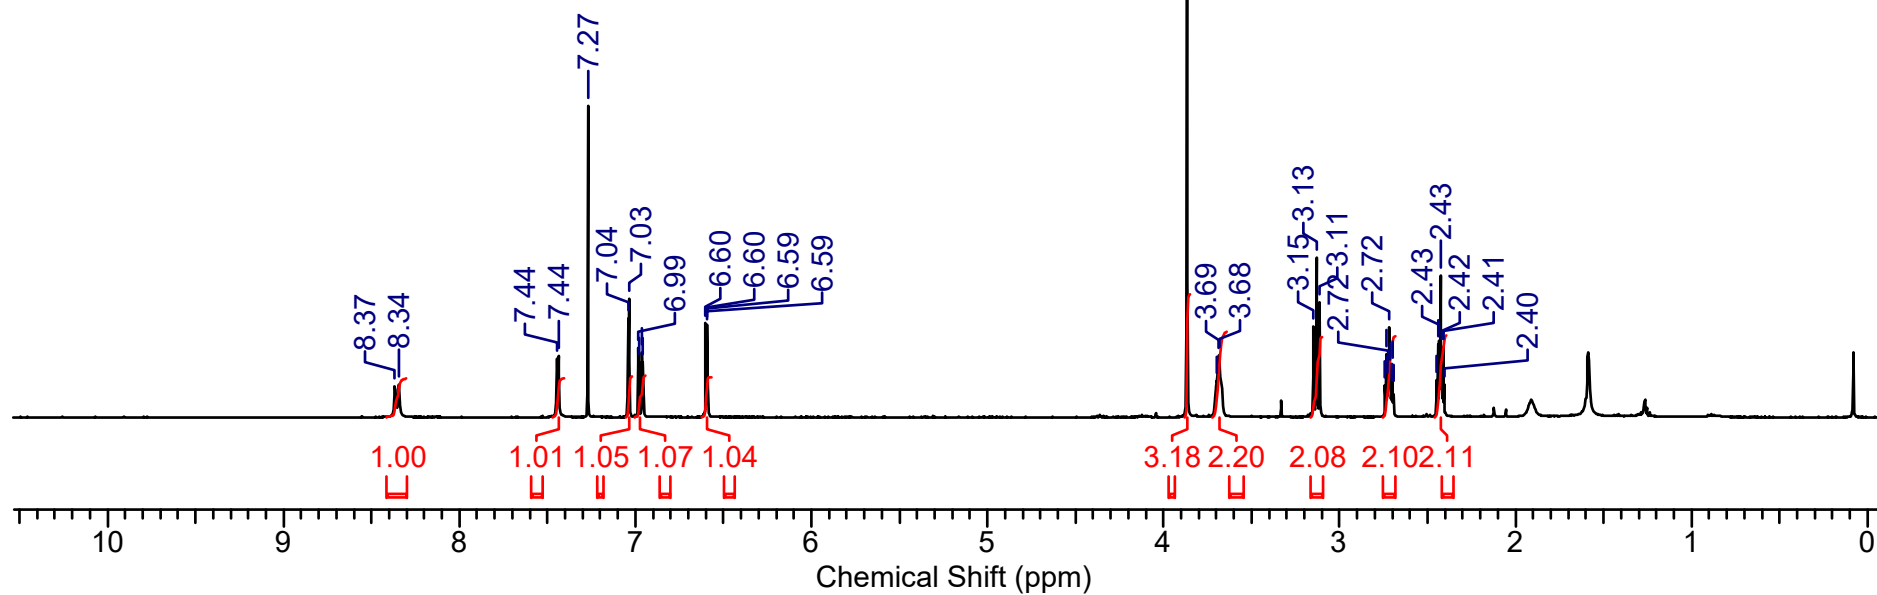

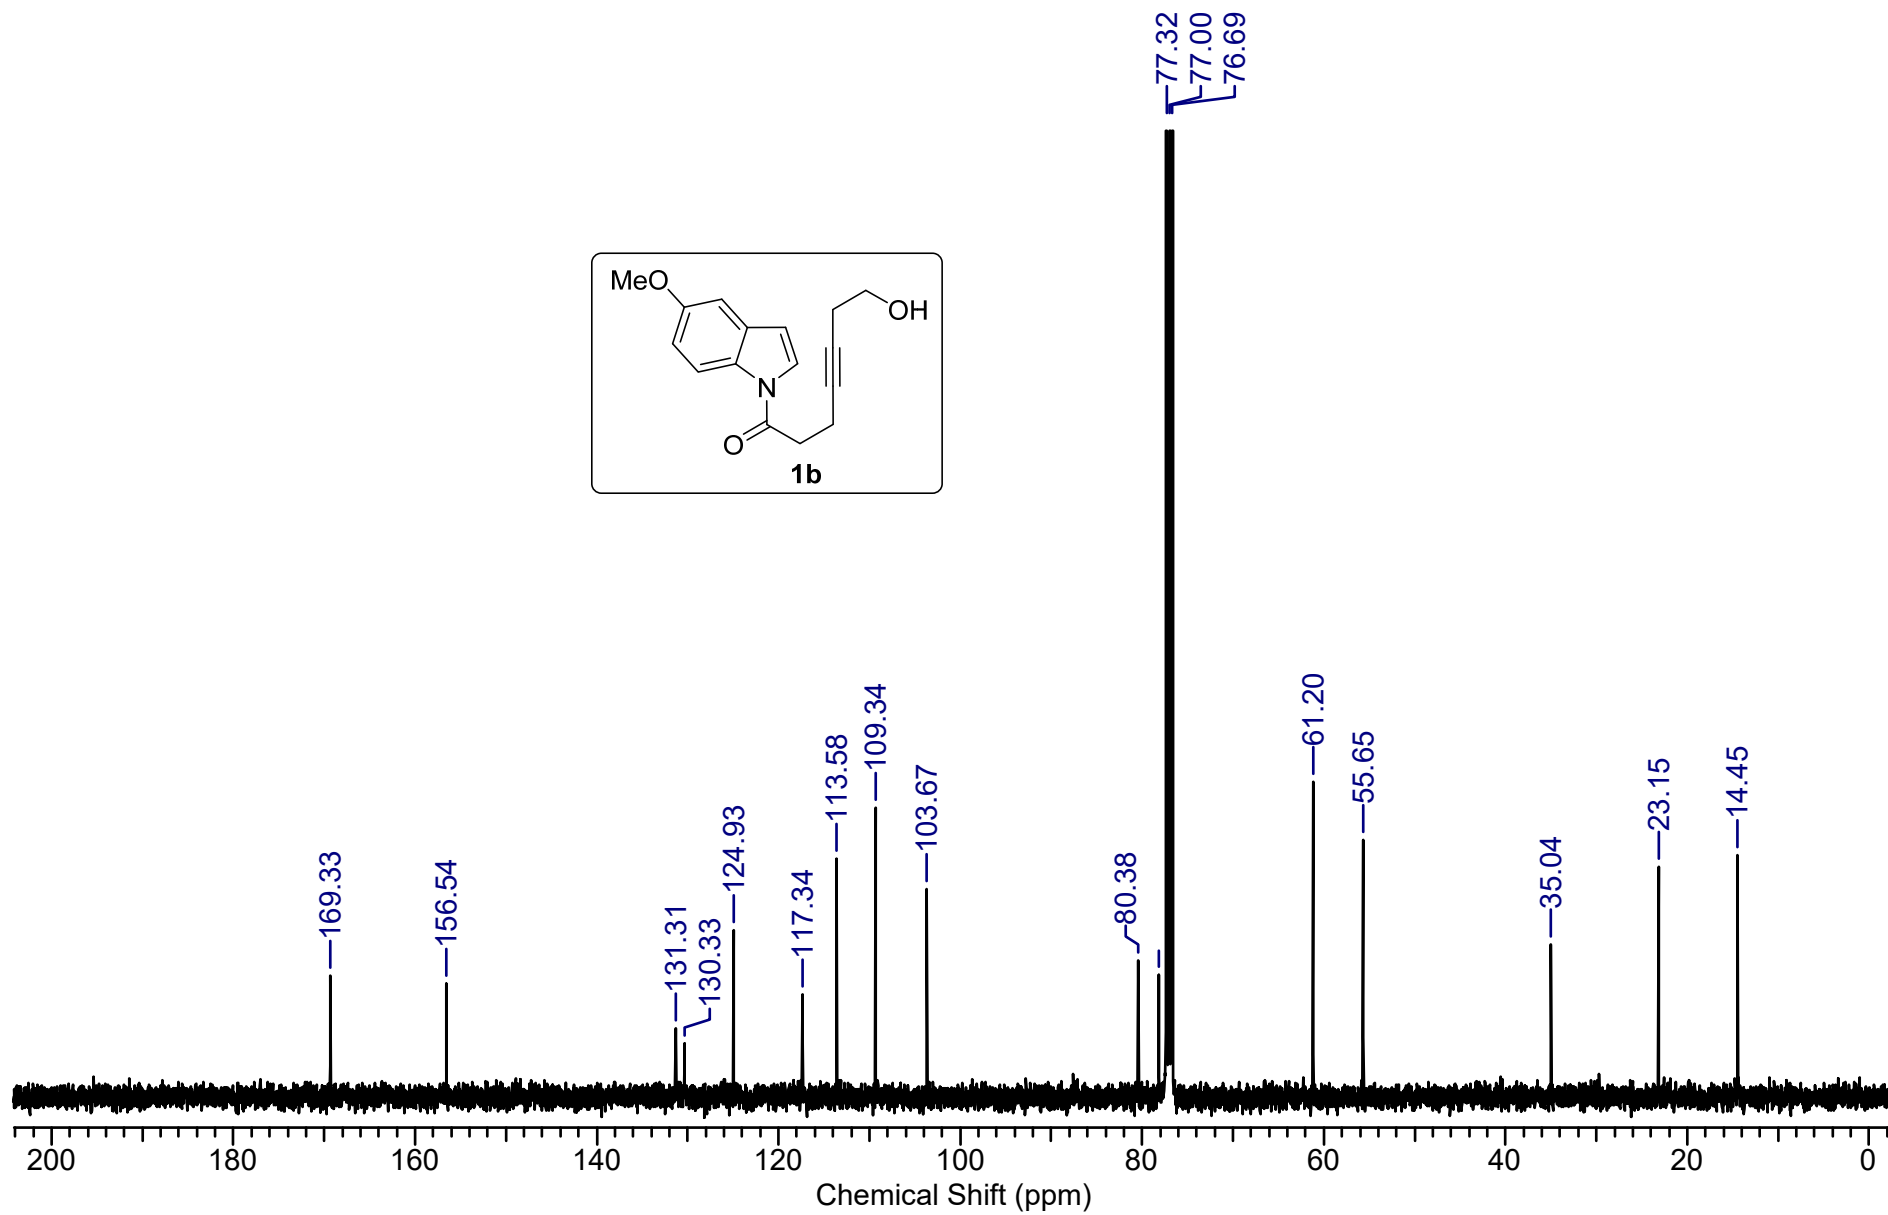

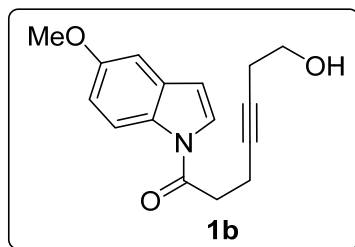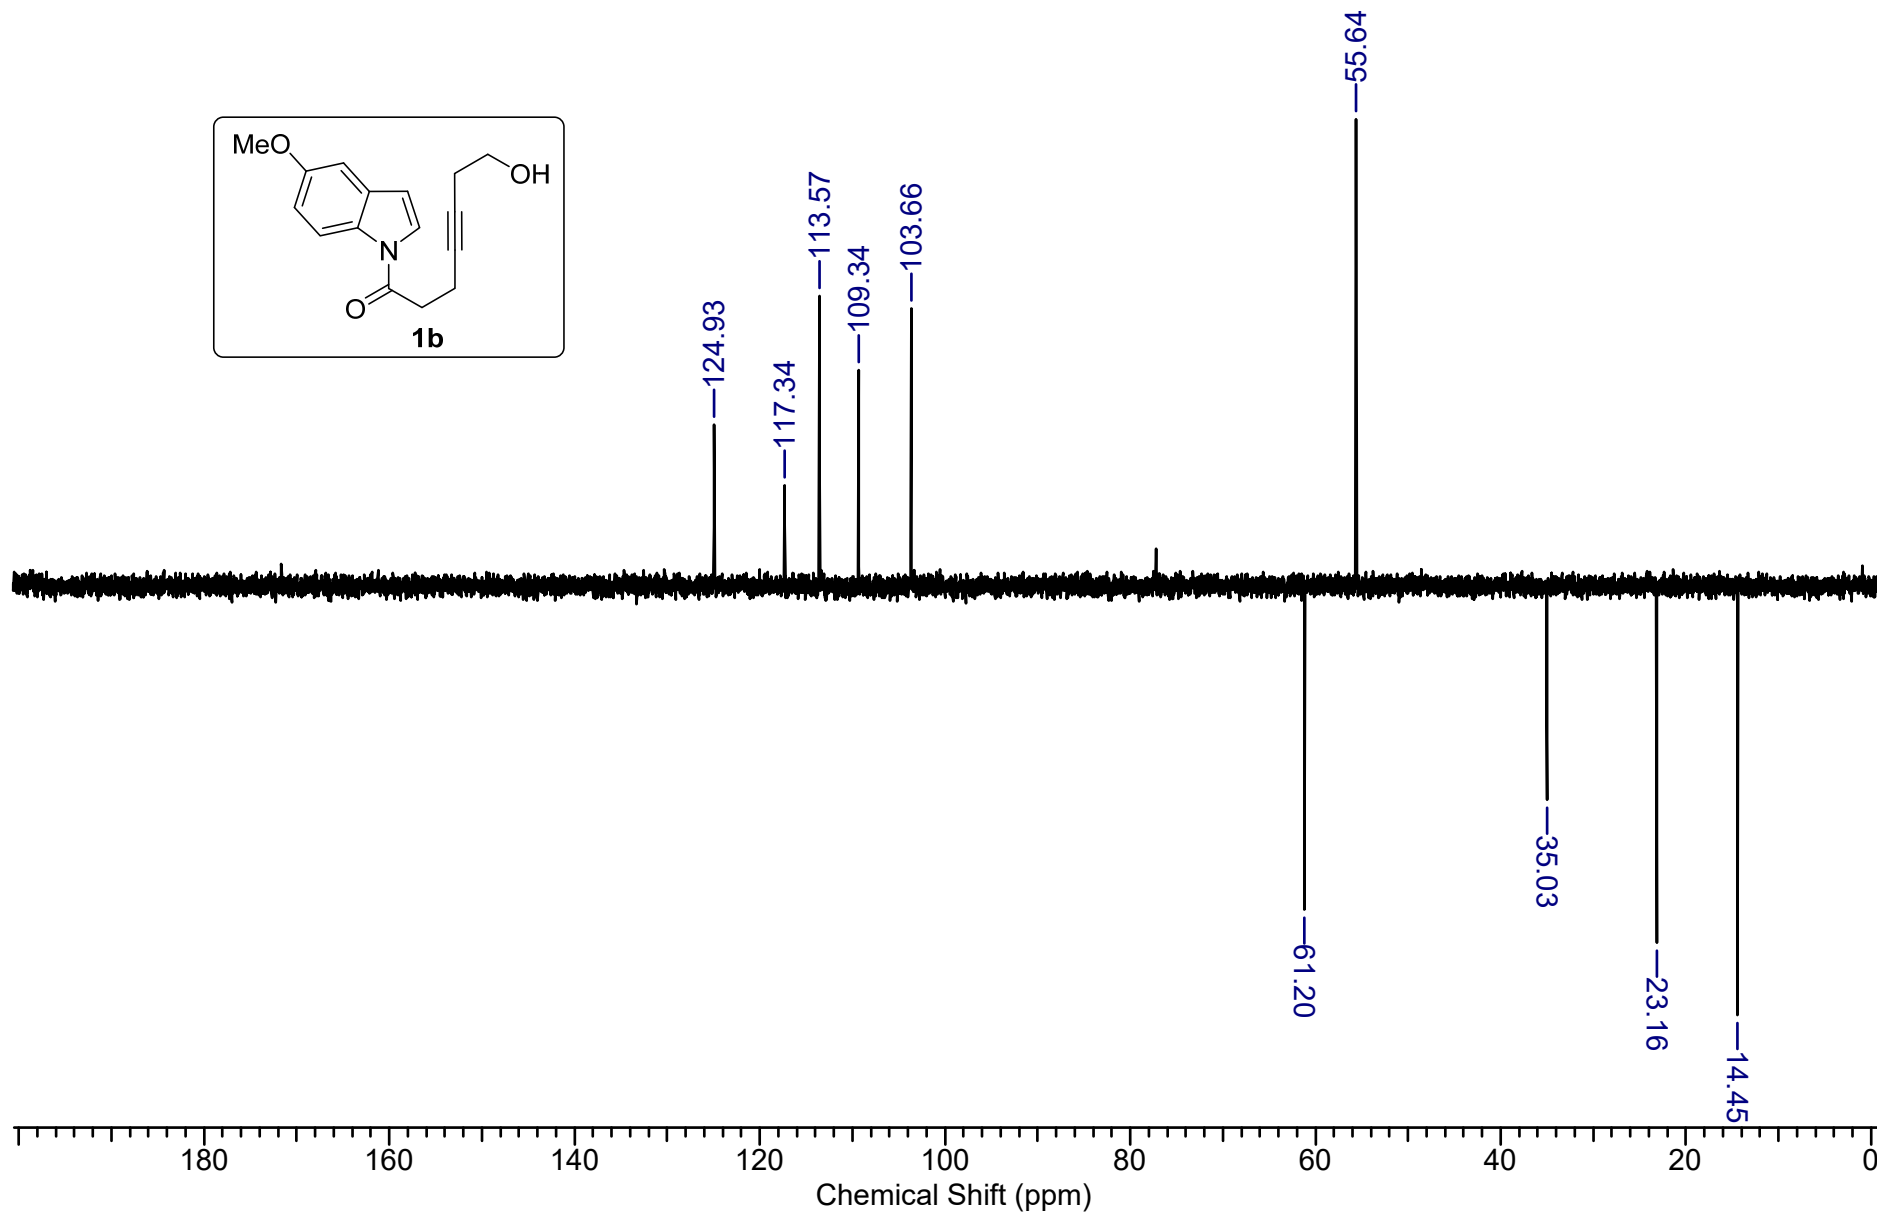



MS-3 #263 RT: 1.41 AV: 1 NL: 3.55E8  
T: FTMS + p ESI Full ms [100.0000-1500.0000]

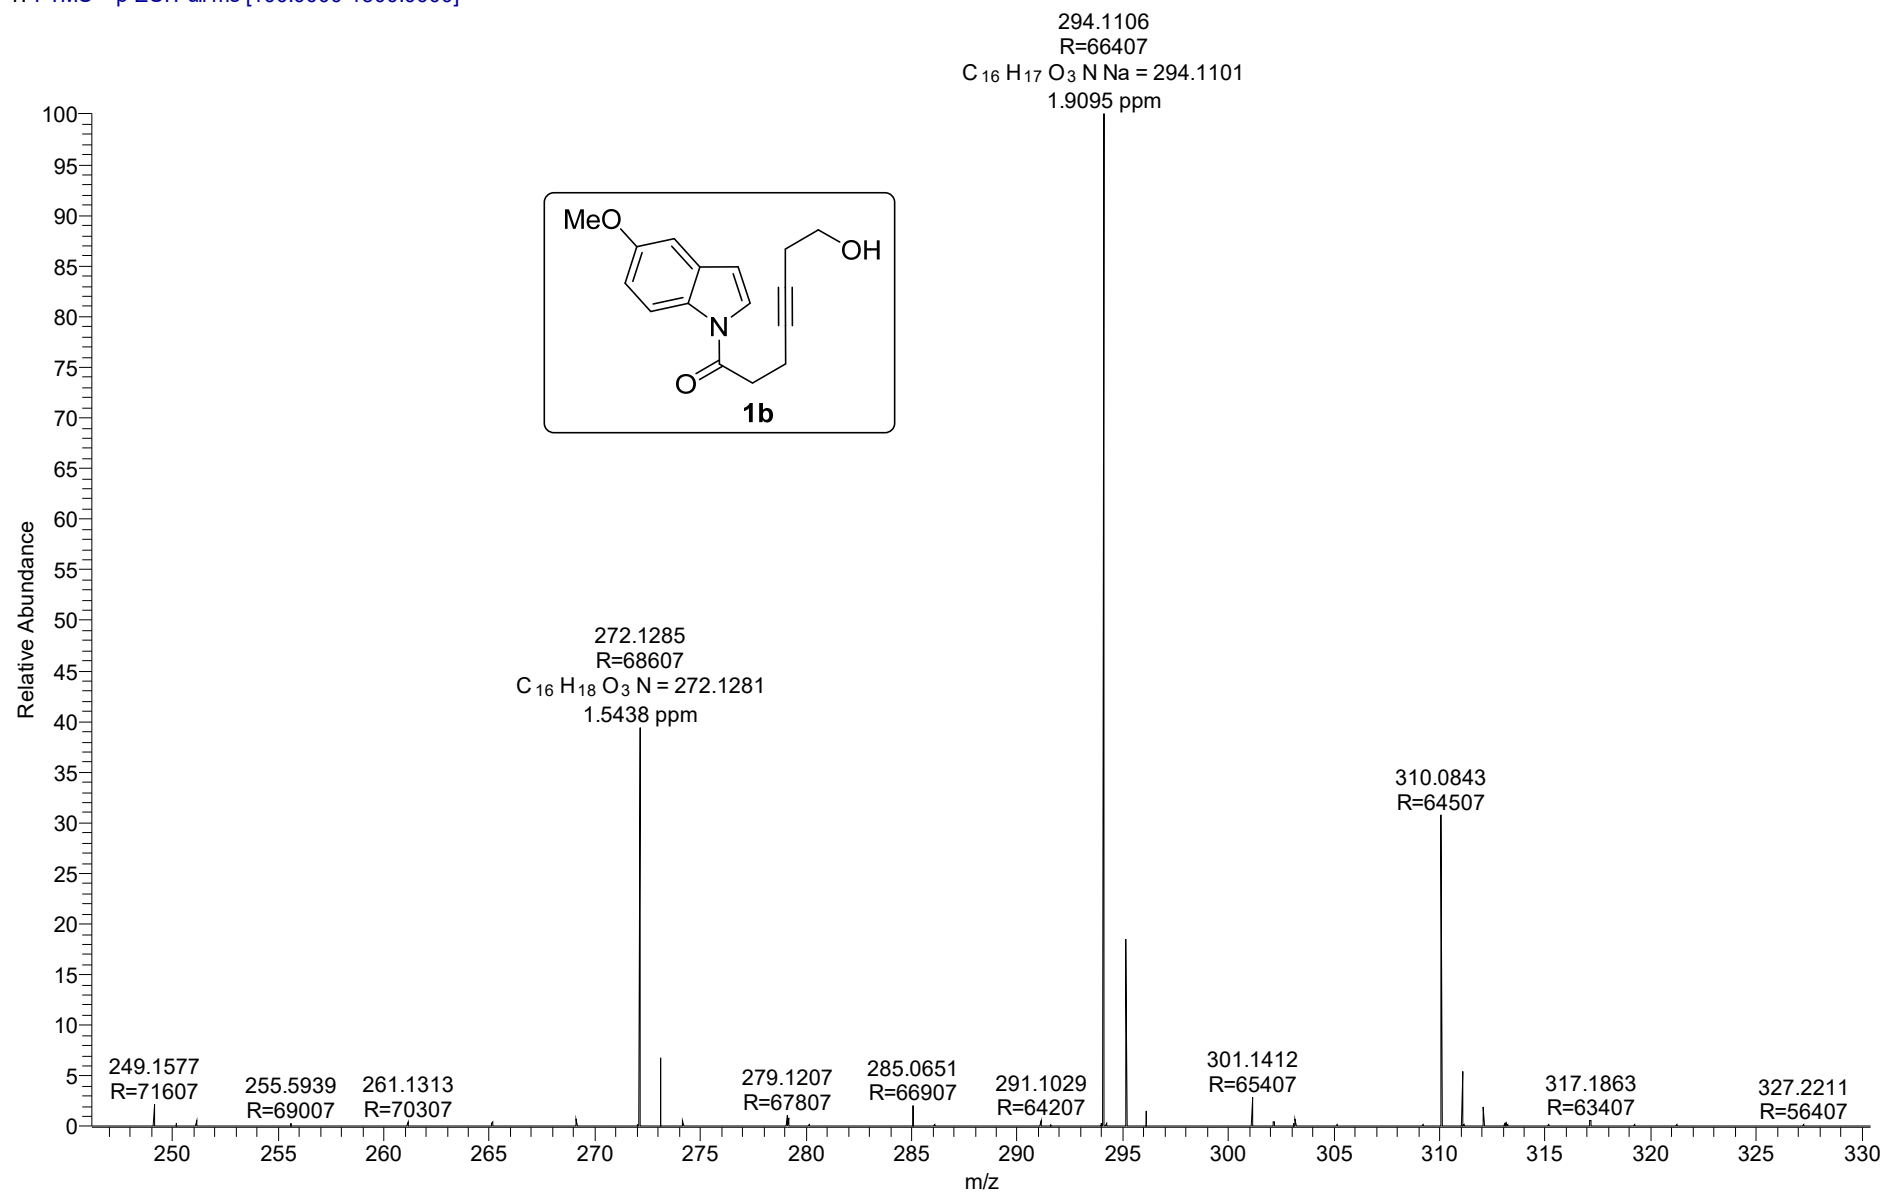

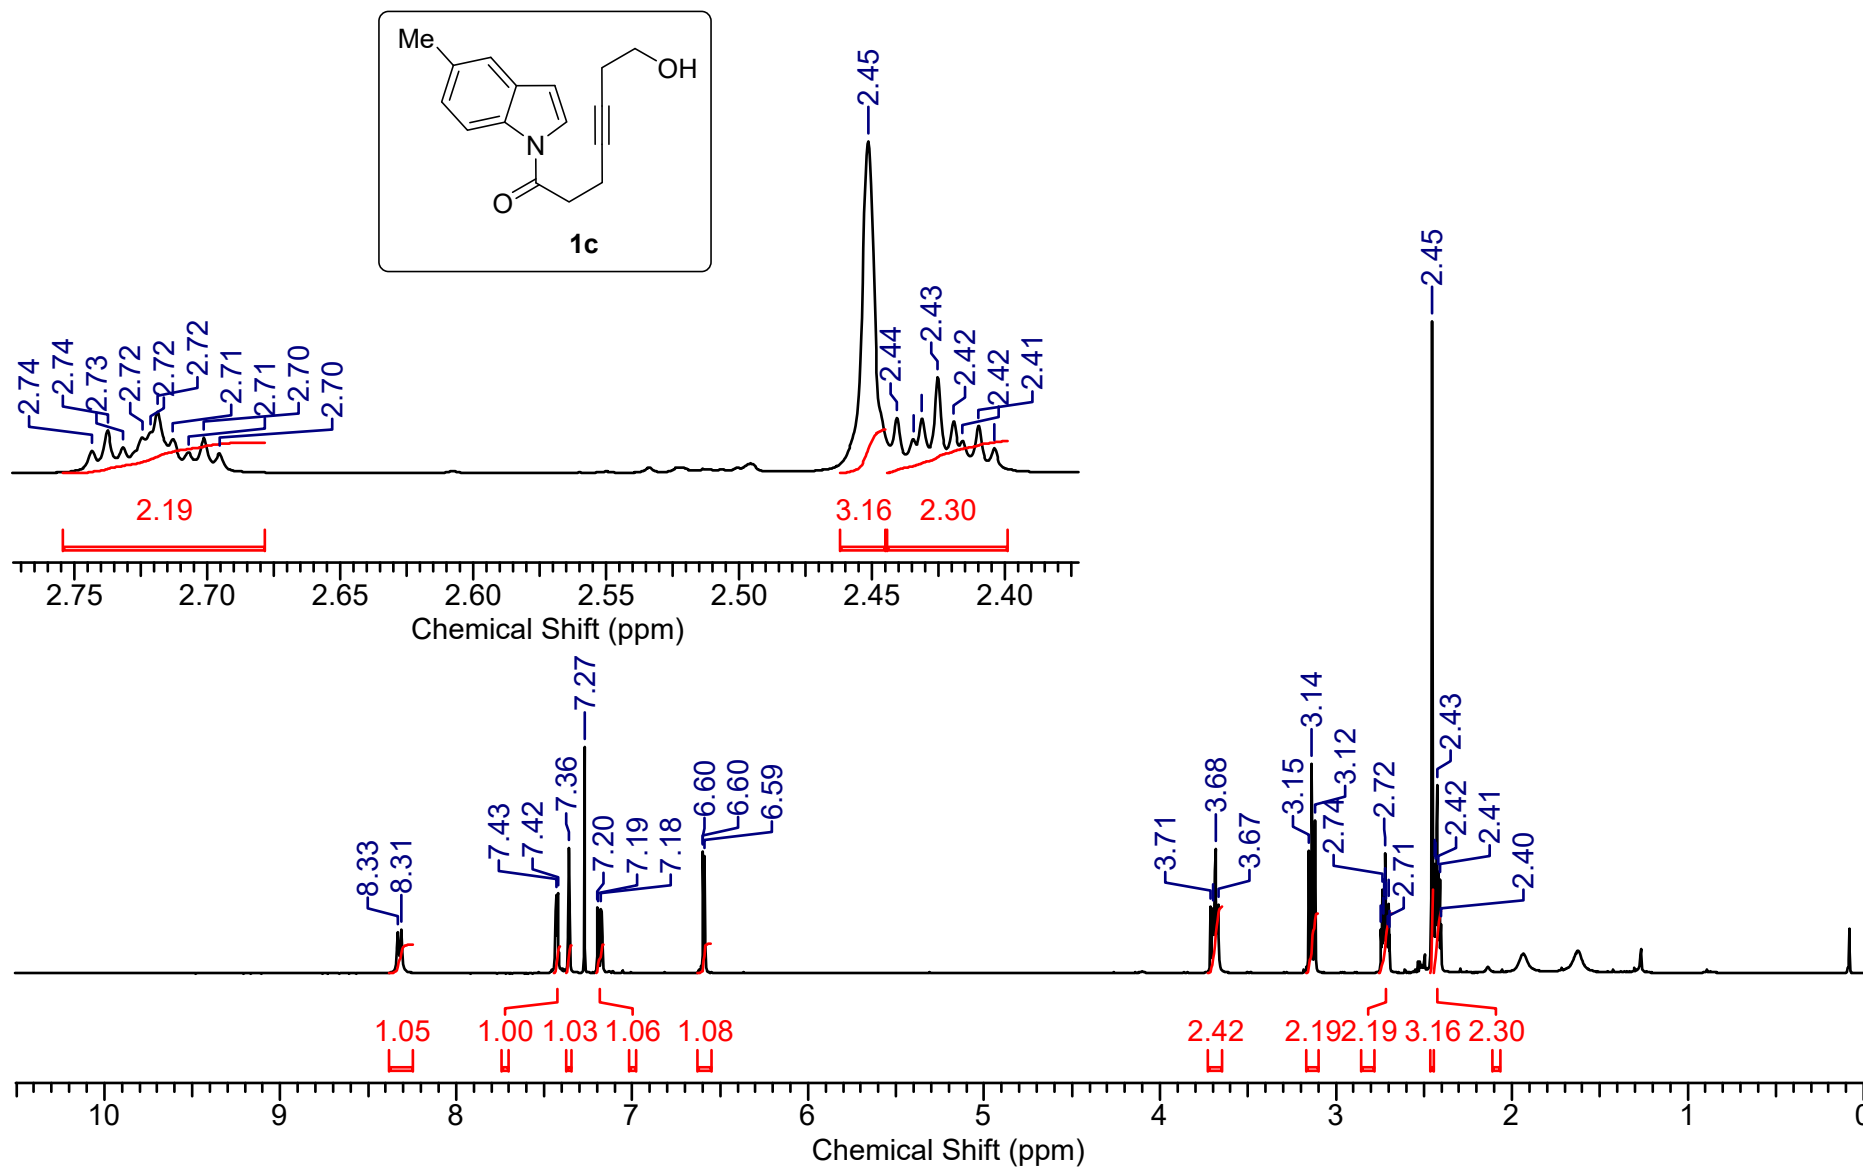

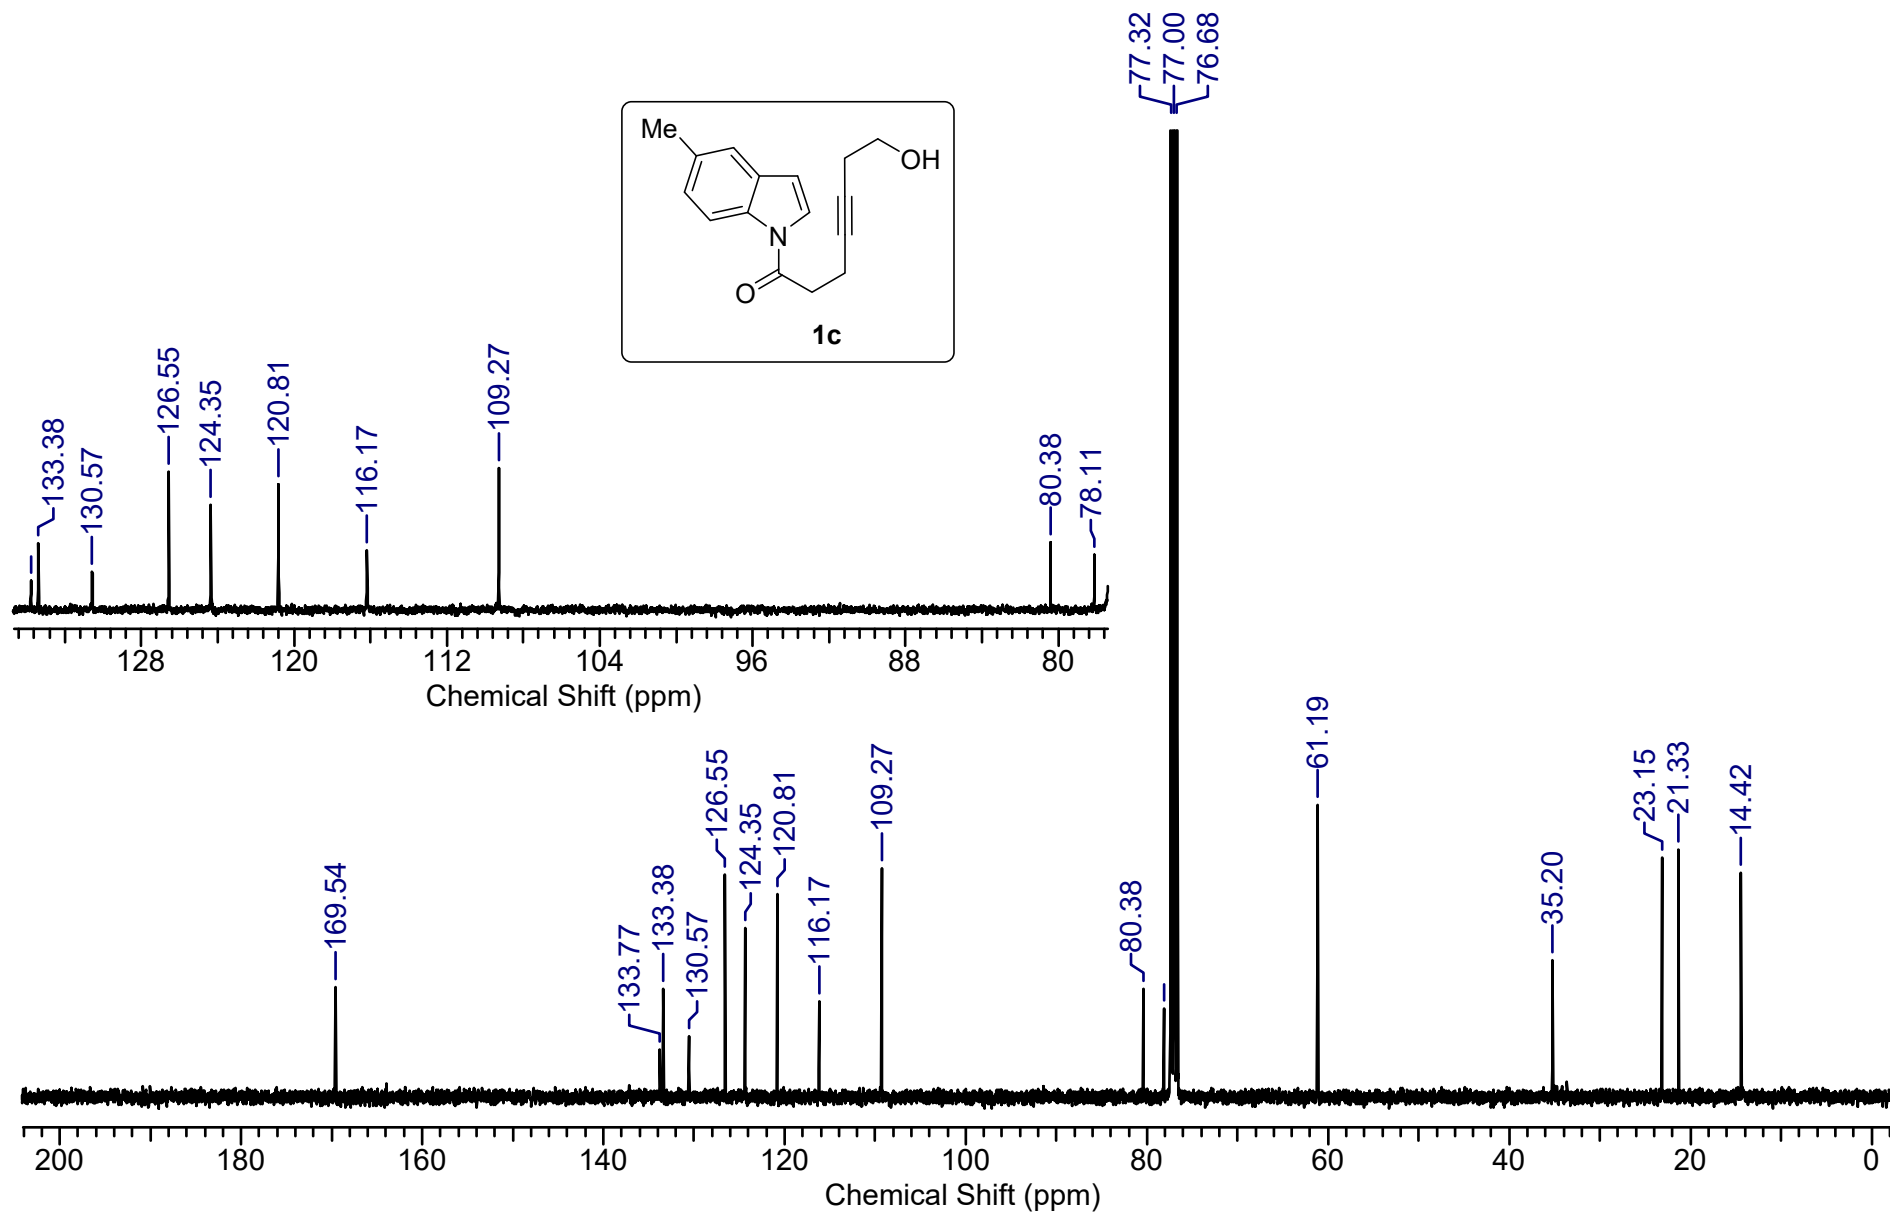

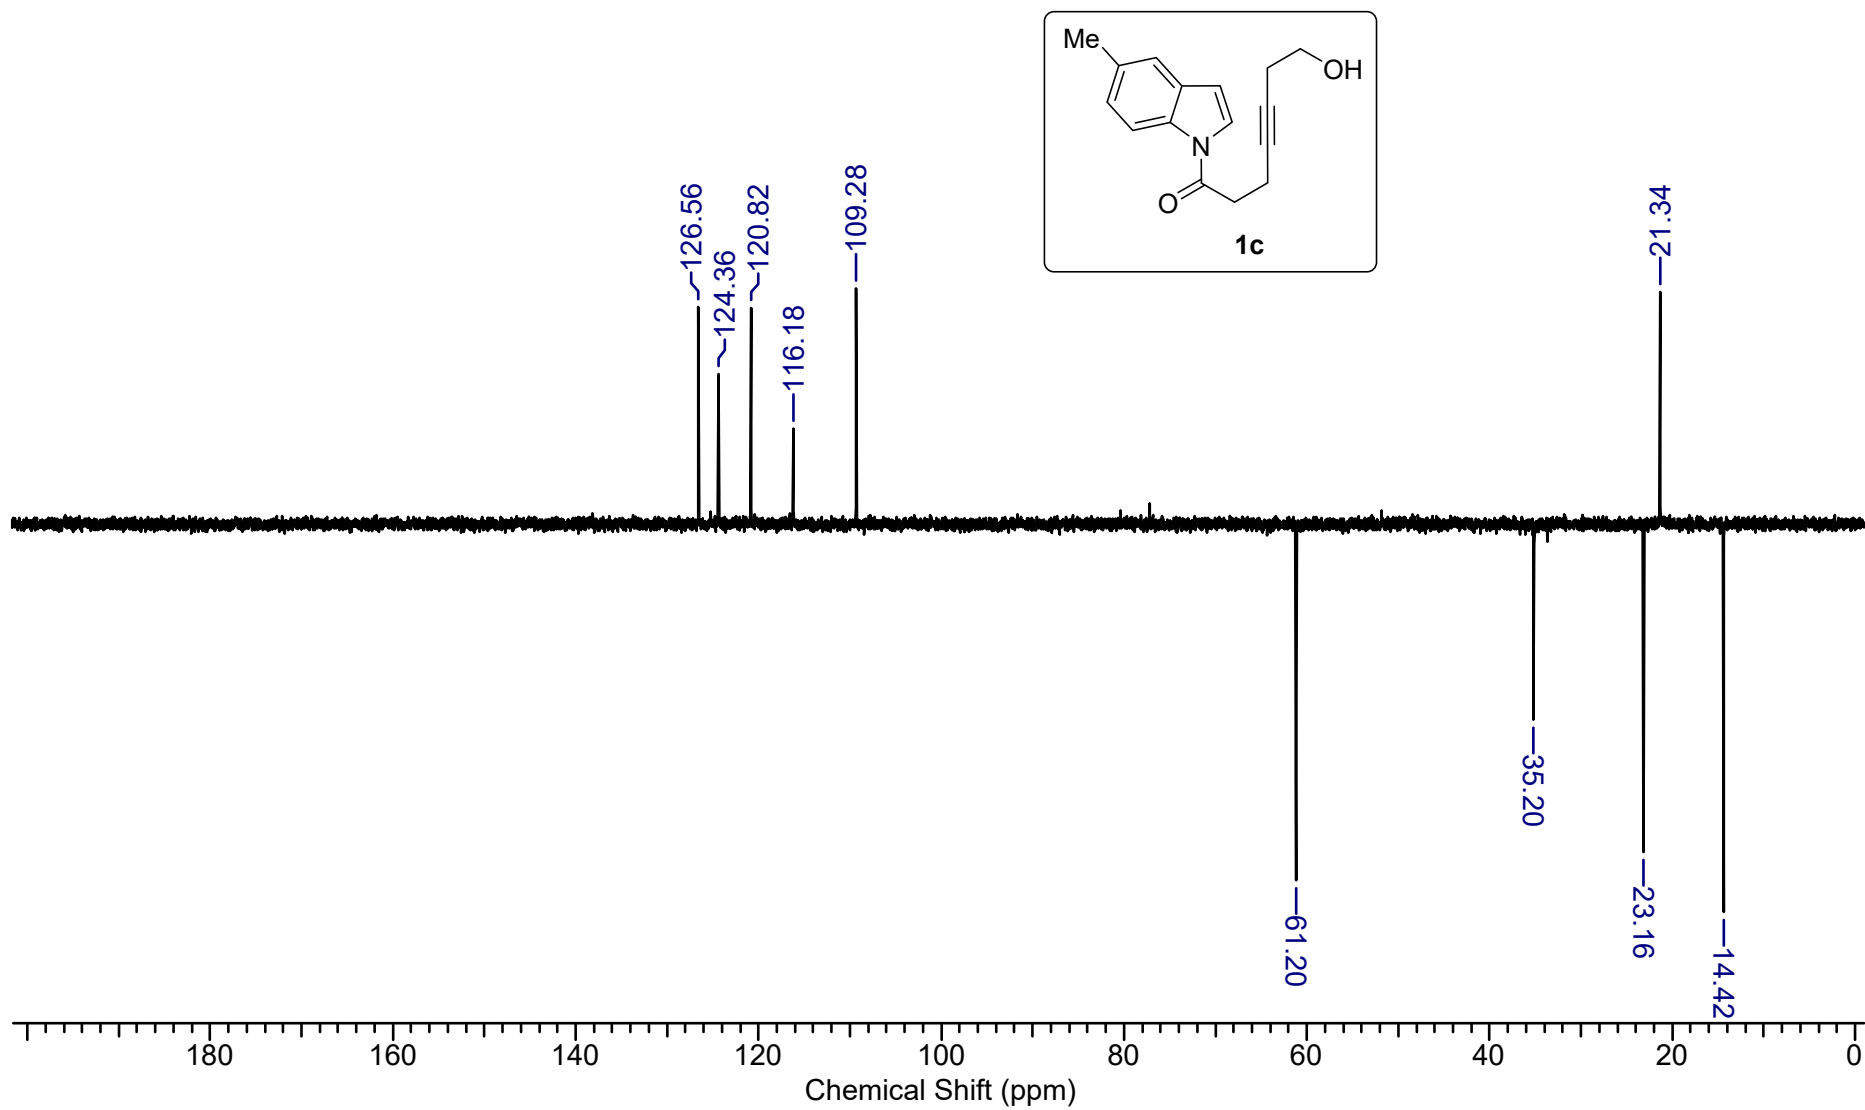

MS-2 #286 RT: 1.53 AV: 1 NL: 2.78E8  
T: FTMS + p ESI Full ms [100.0000-1500.0000]

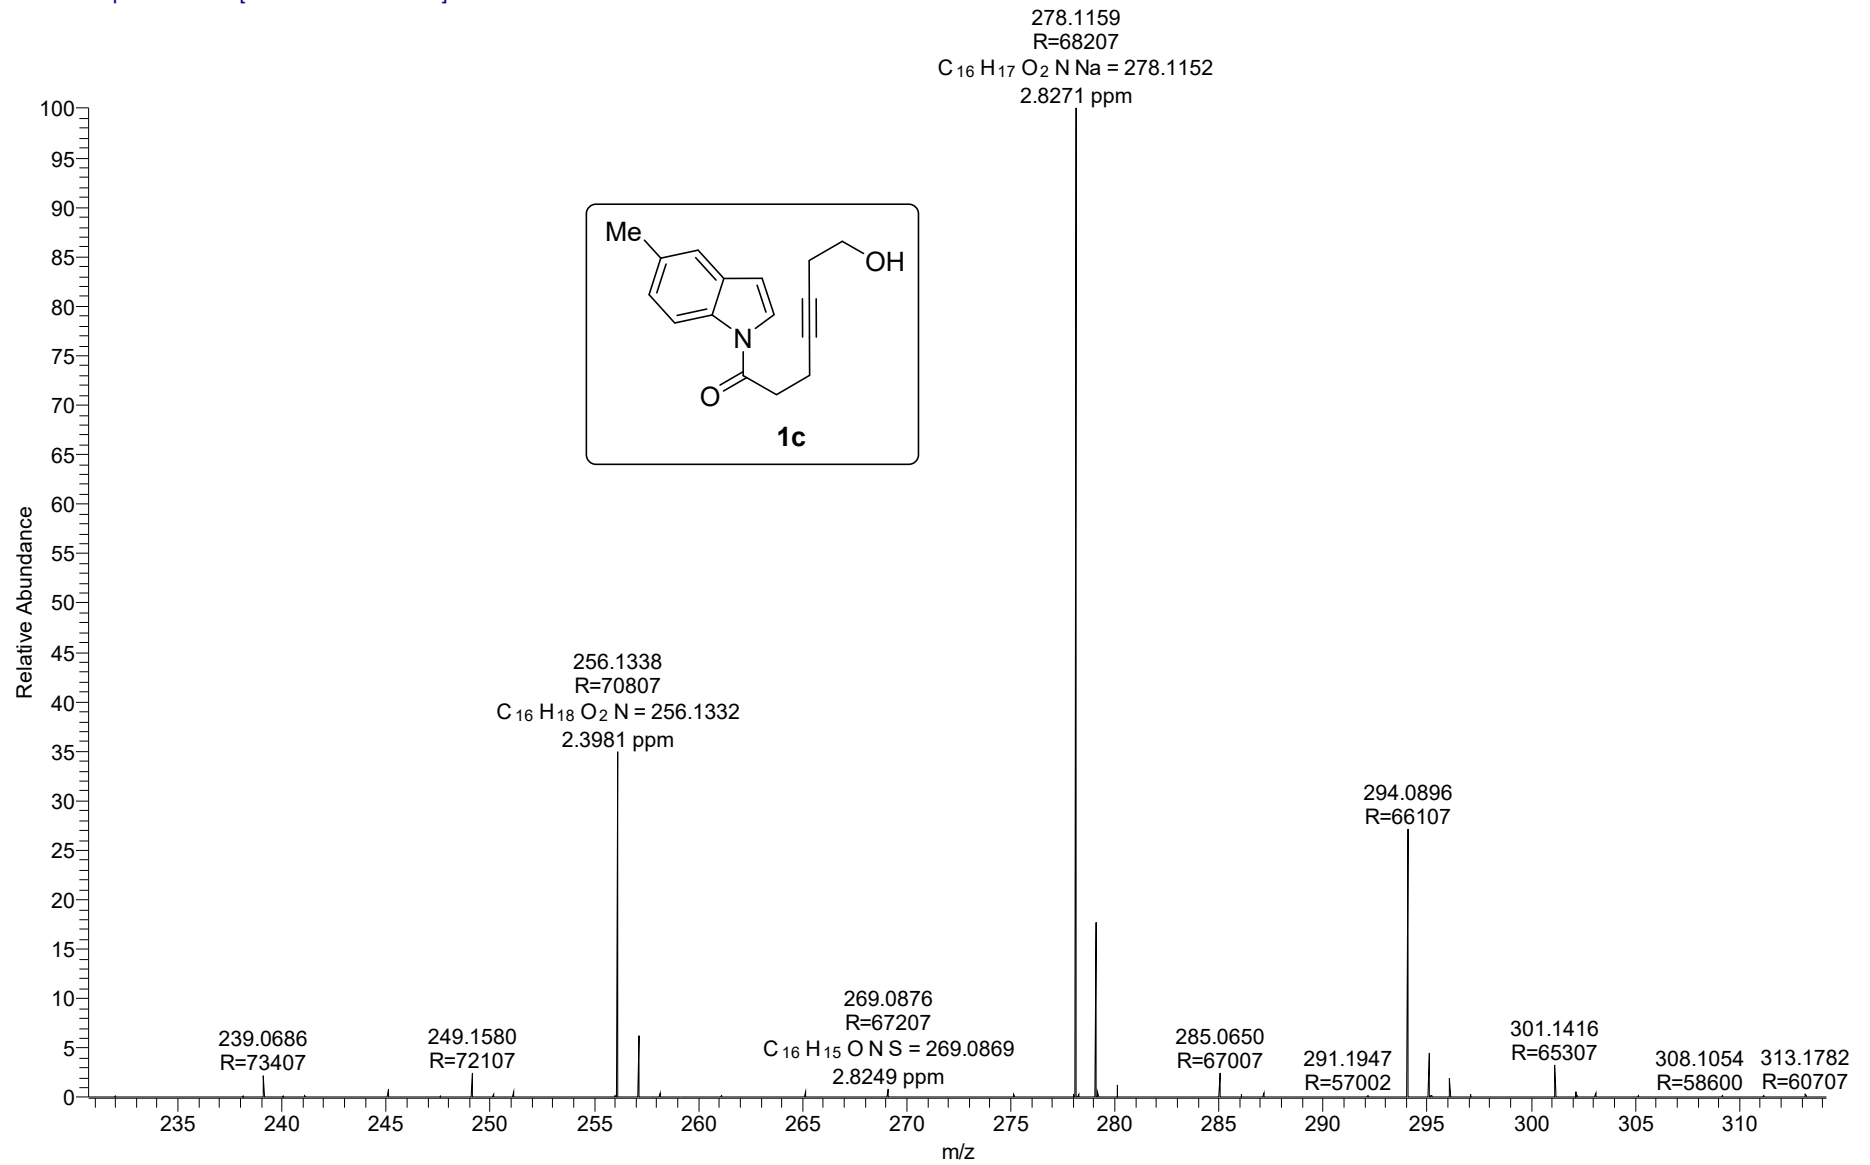

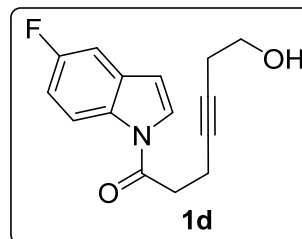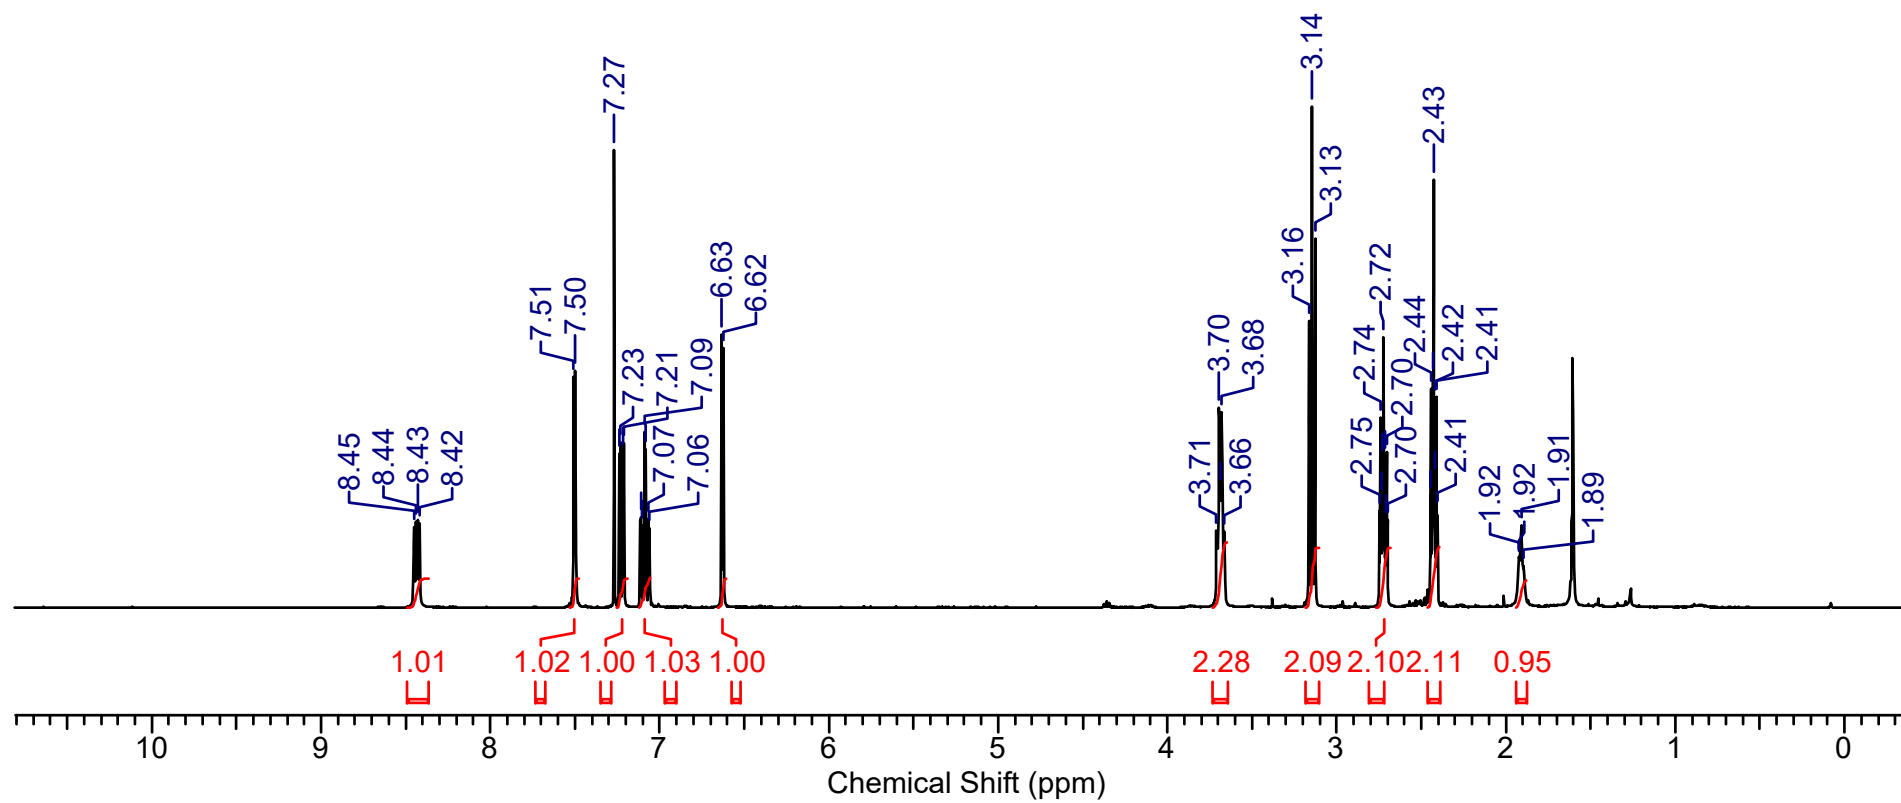

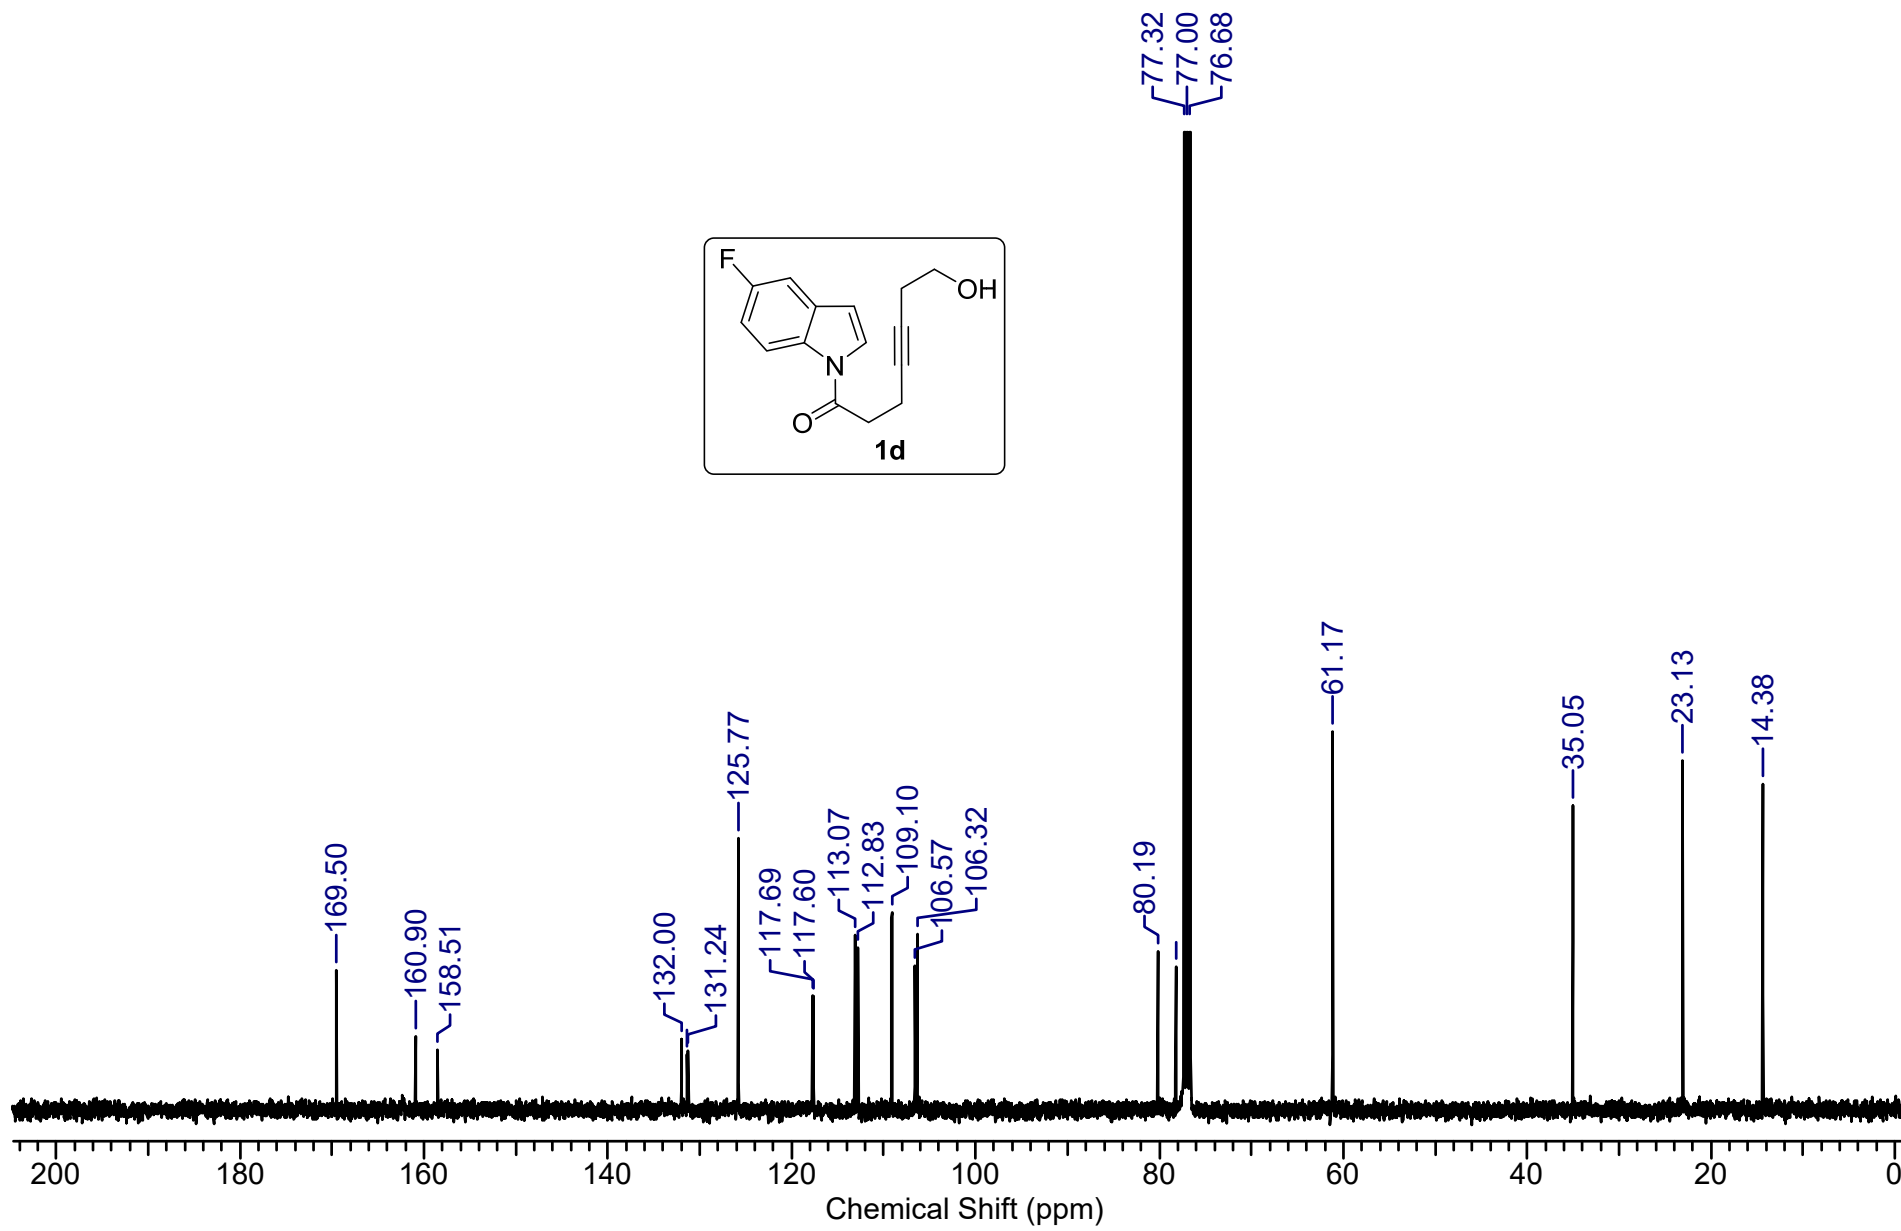

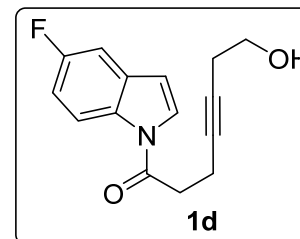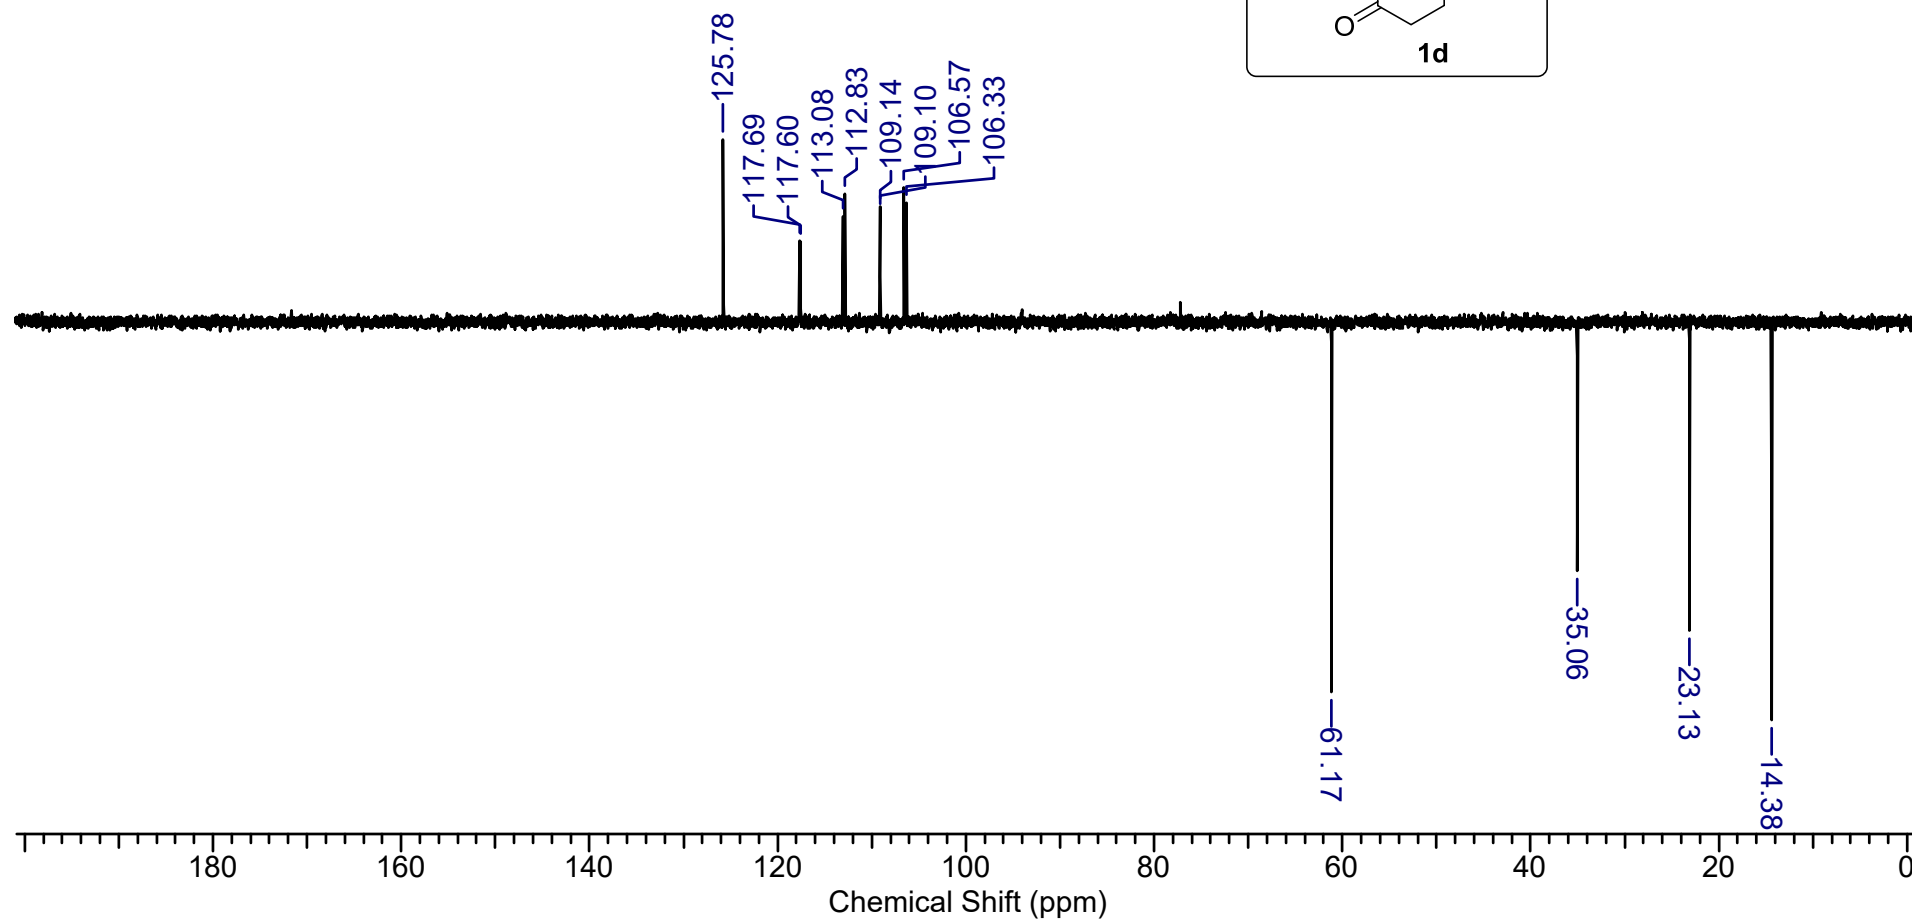



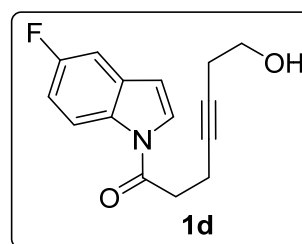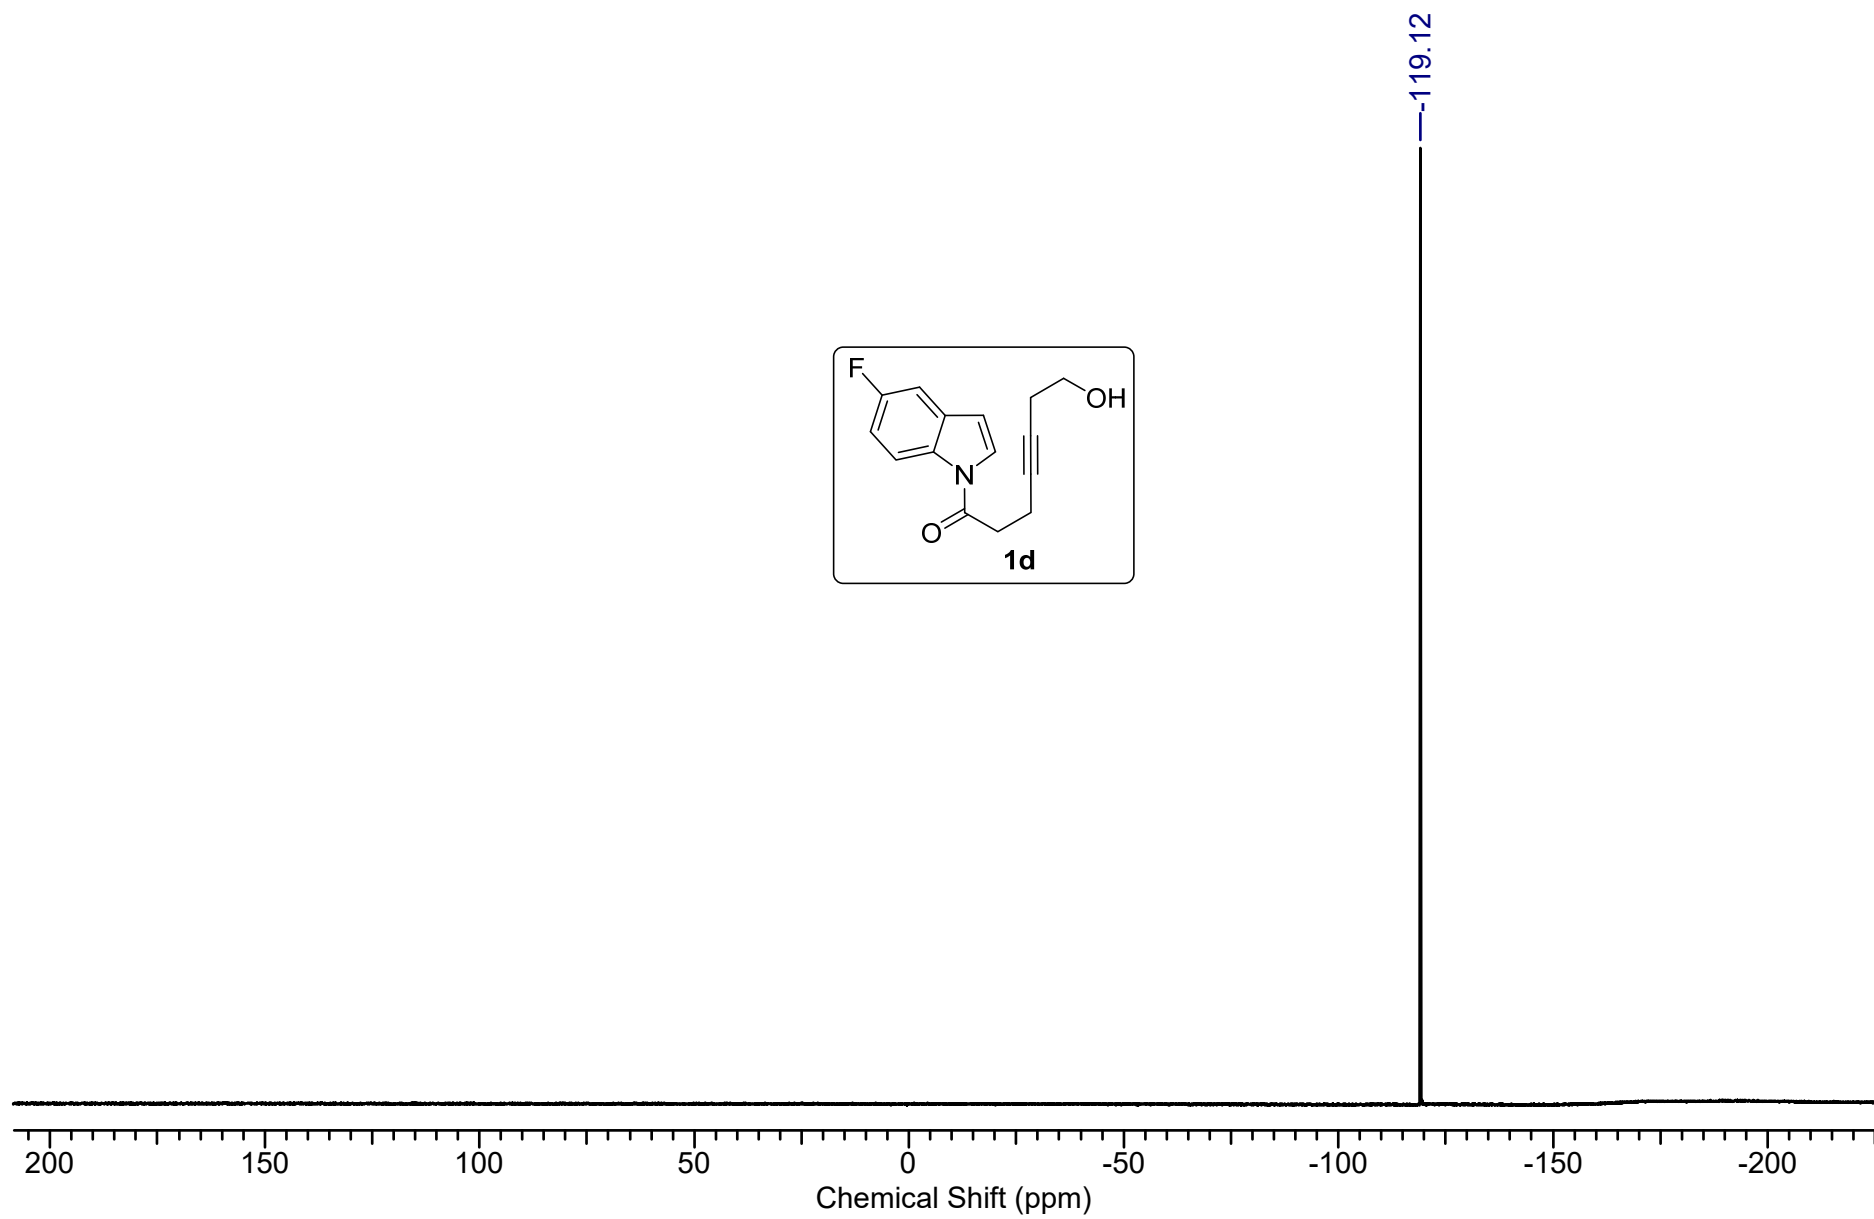

MS-4 #266 RT: 1.42 AV: 1 NL: 2.80E8  
T: FTMS + p ESI Full ms [100.0000-1500.0000]

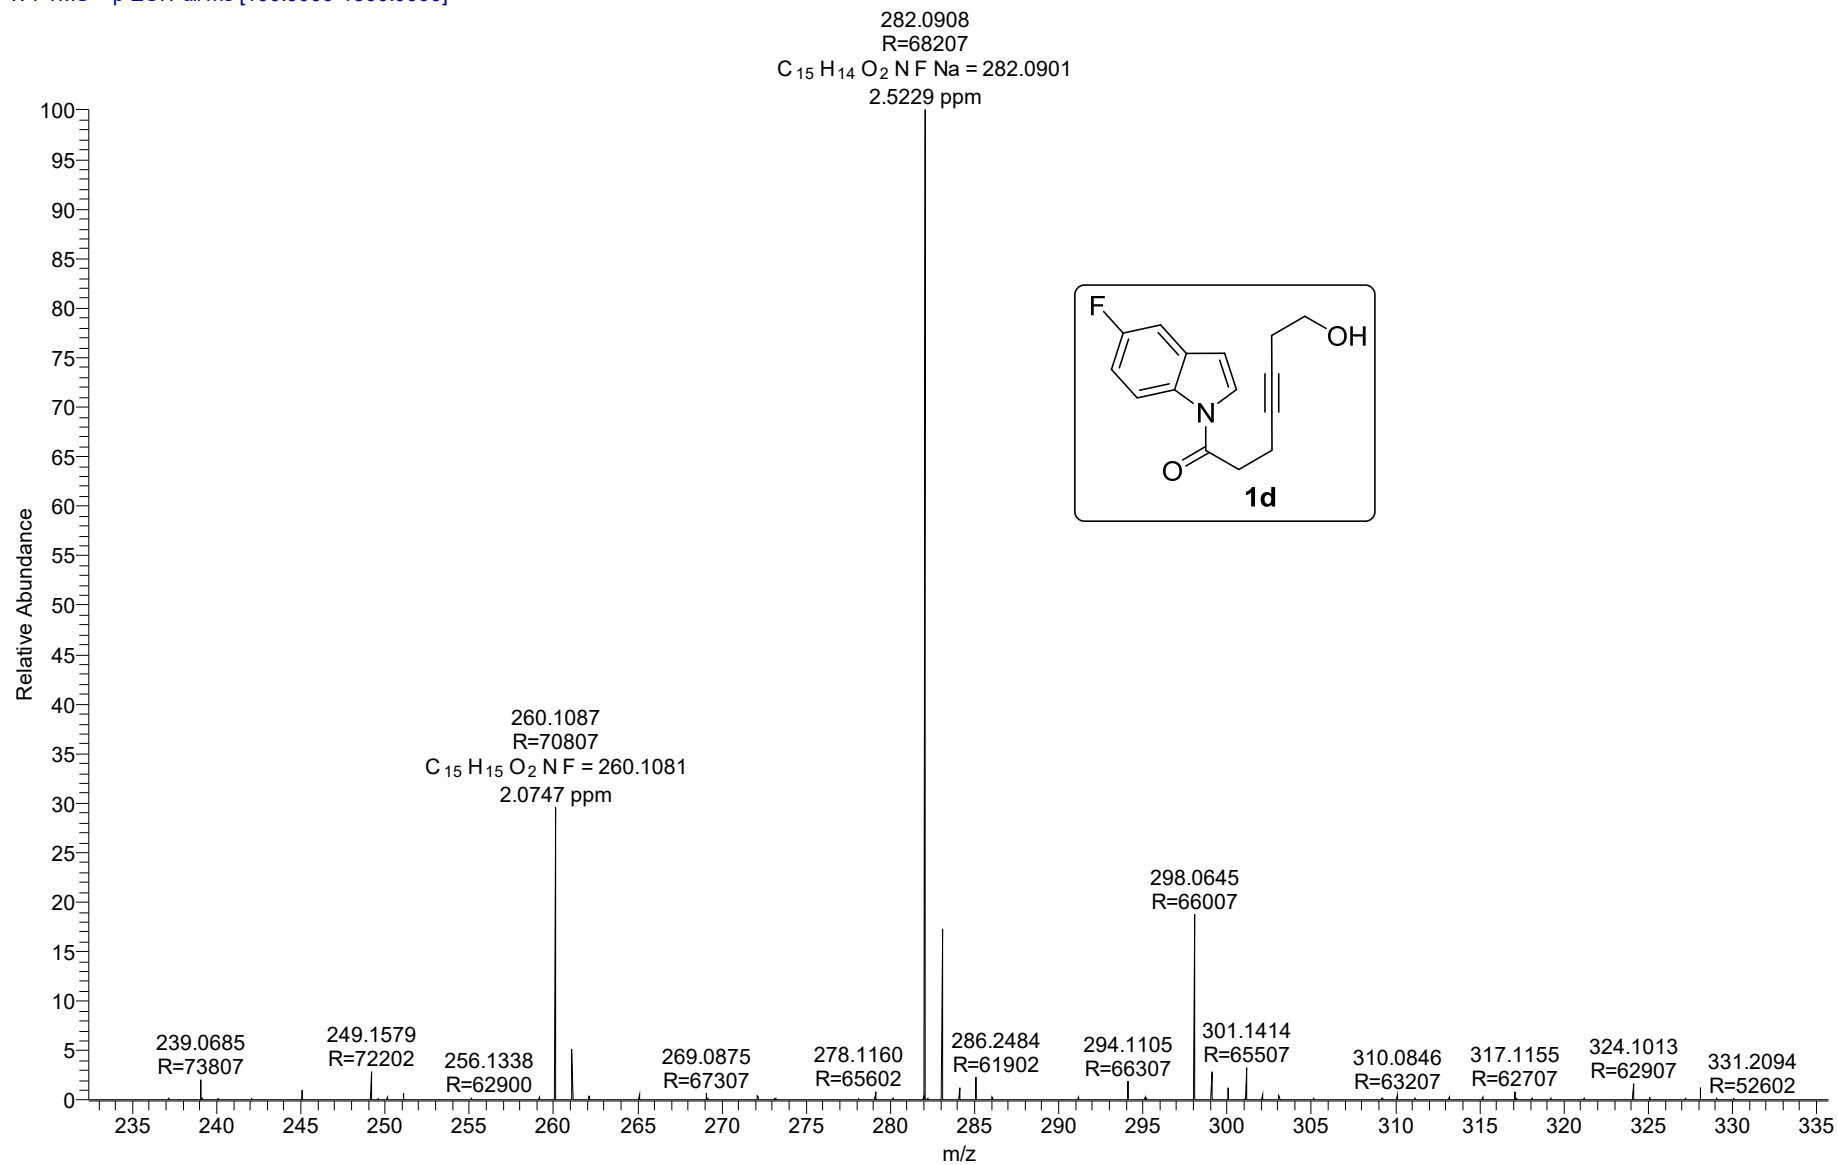

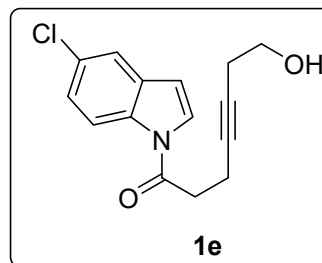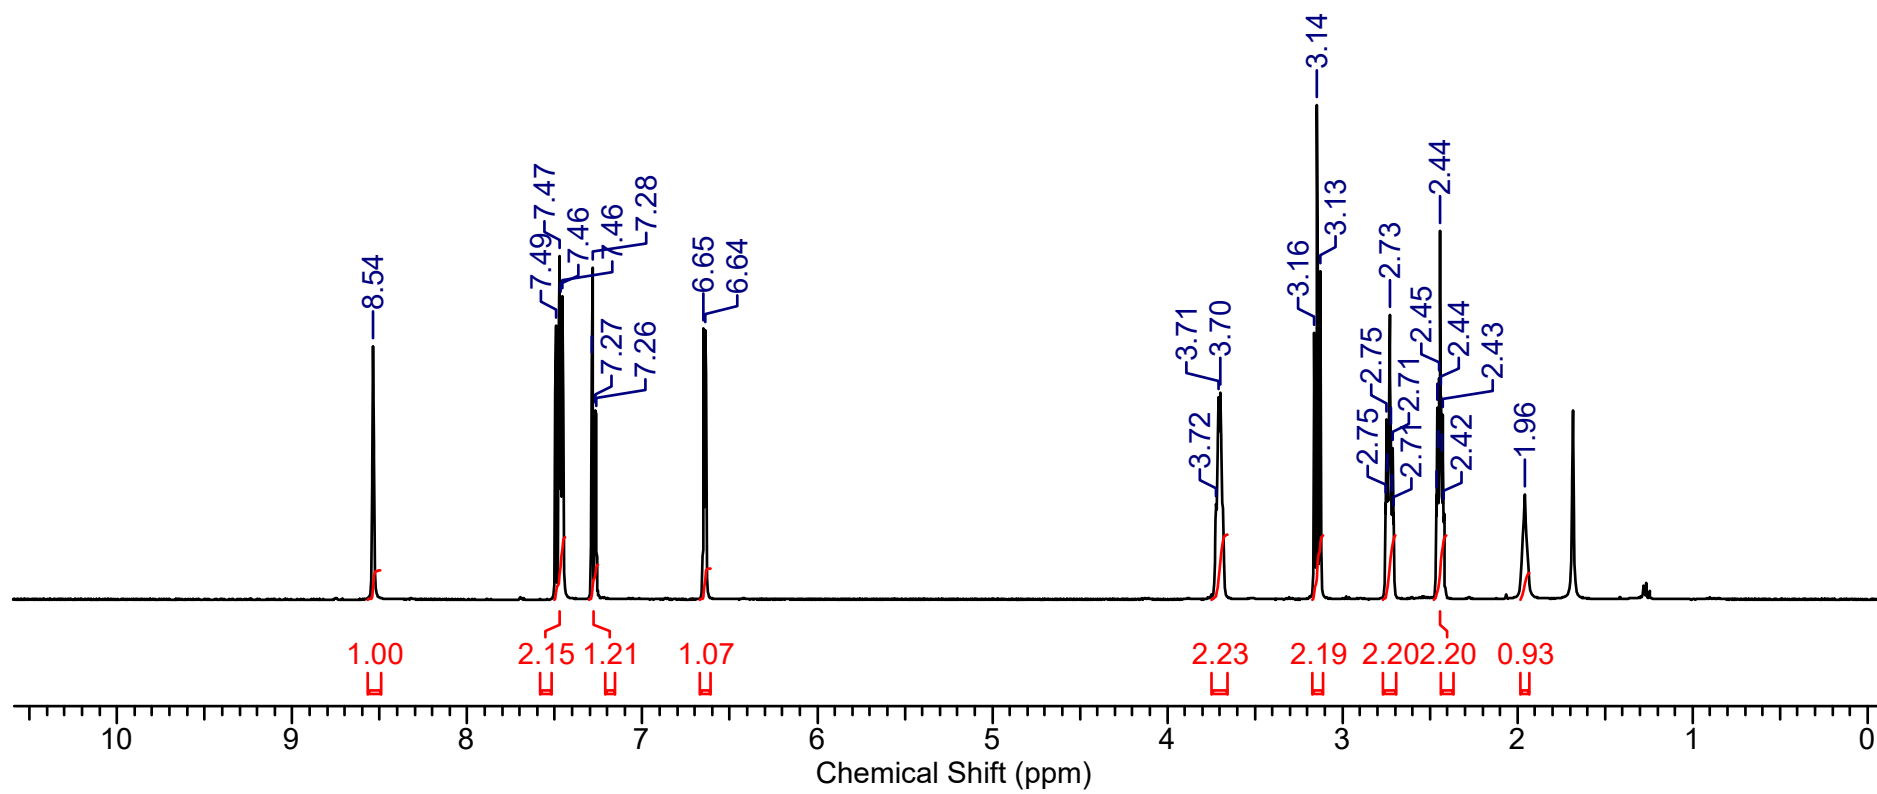

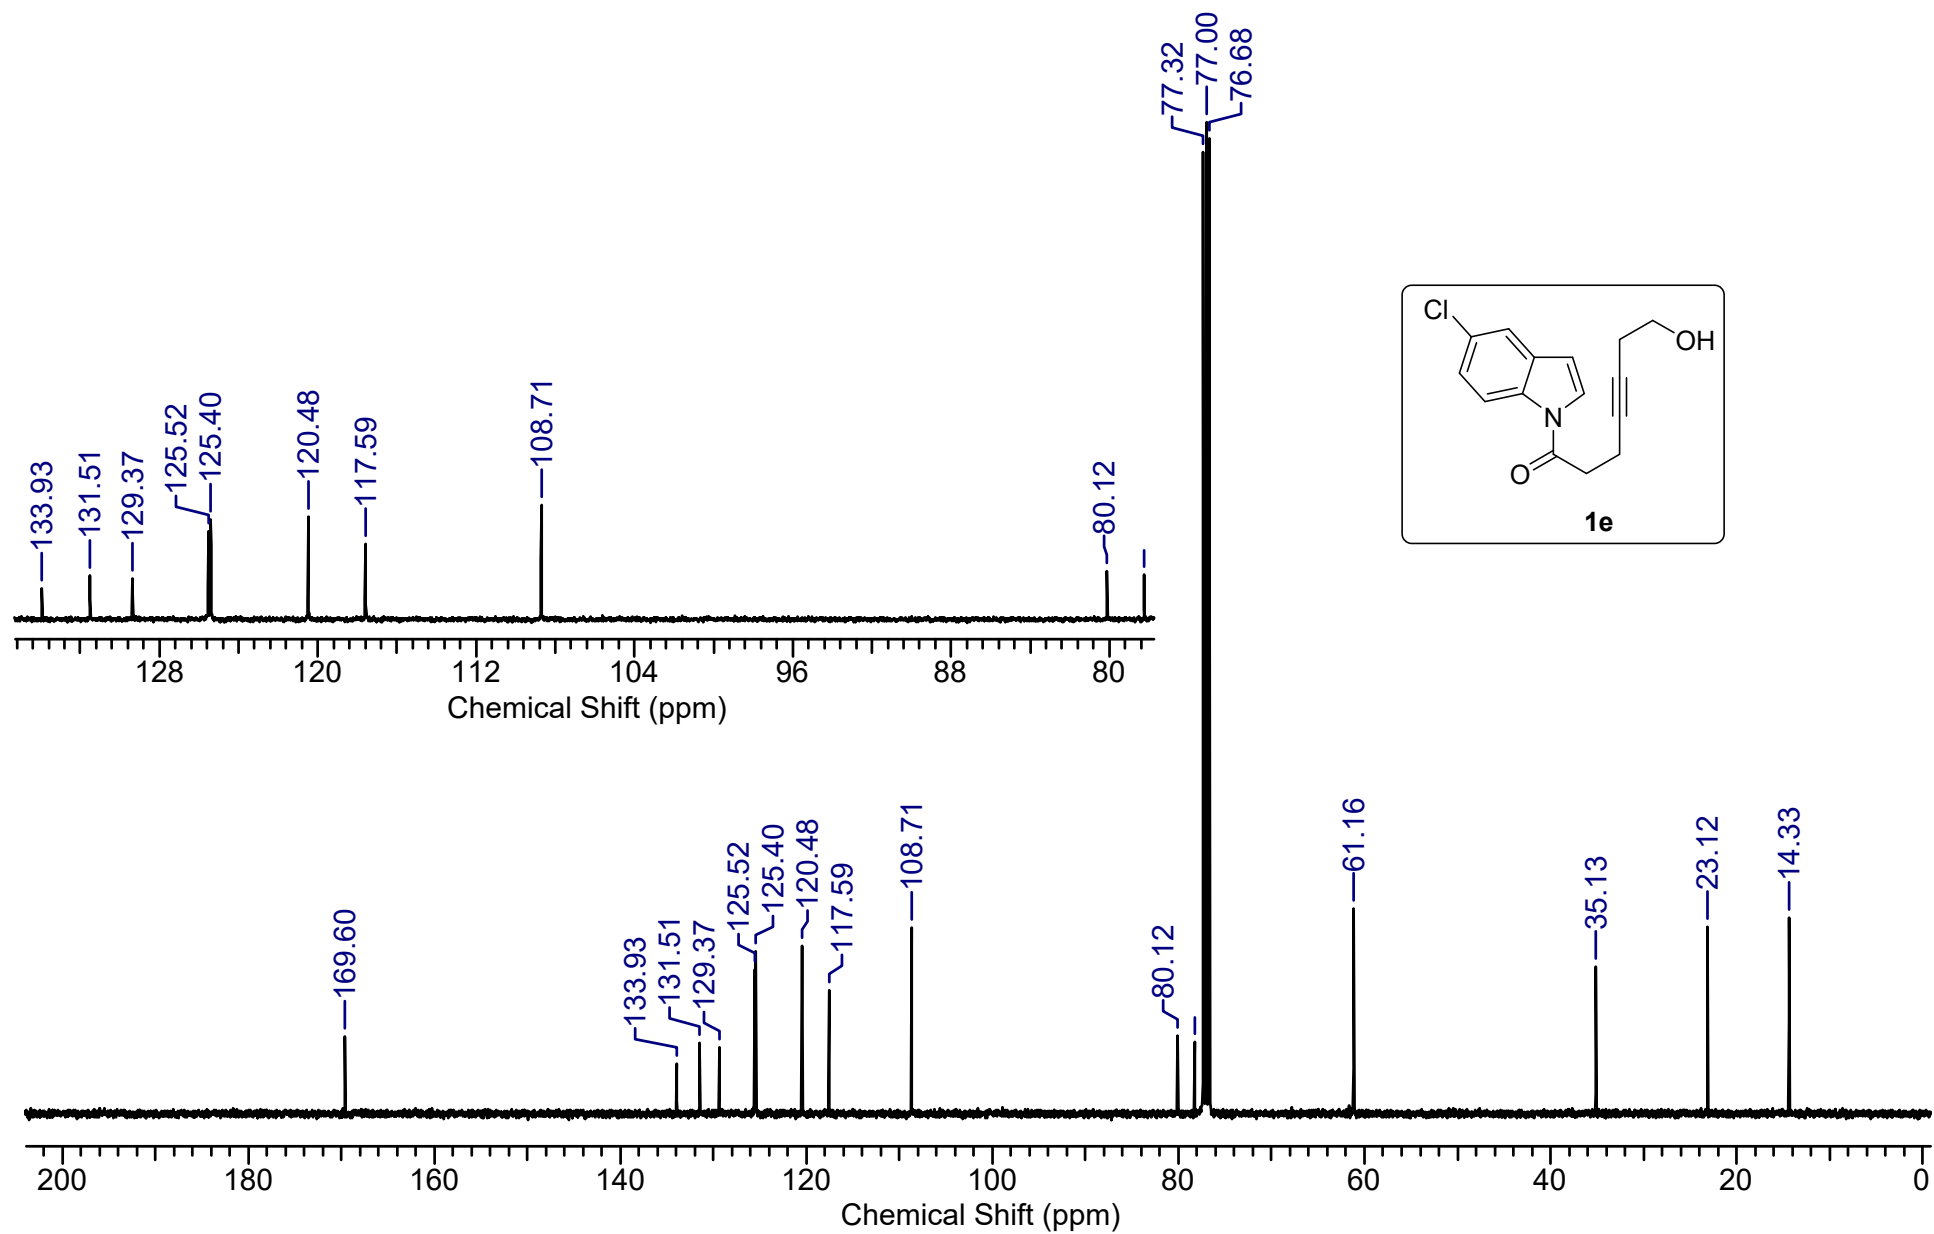

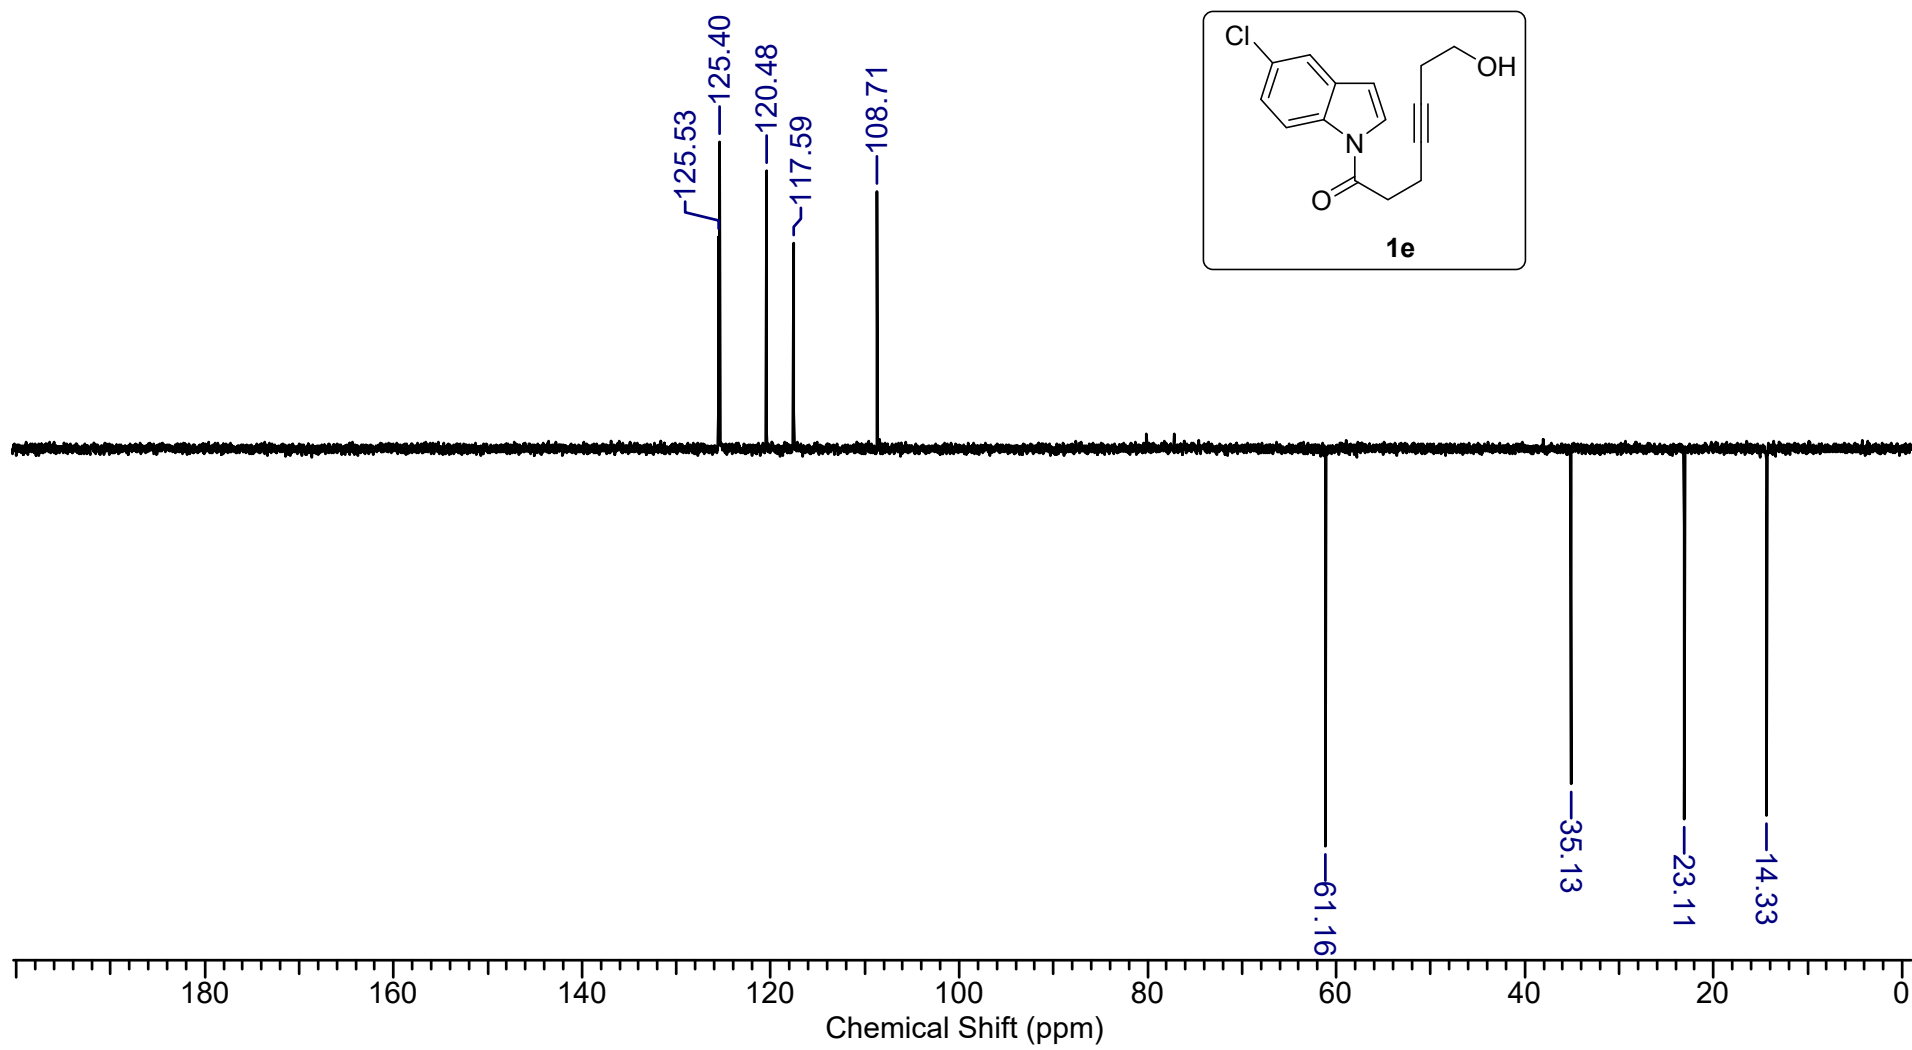

MSH-52 #248 RT: 1.35 AV: 1 NL: 1.57E8  
T: FTMS + p ESI Full ms [100.0000-1500.0000]

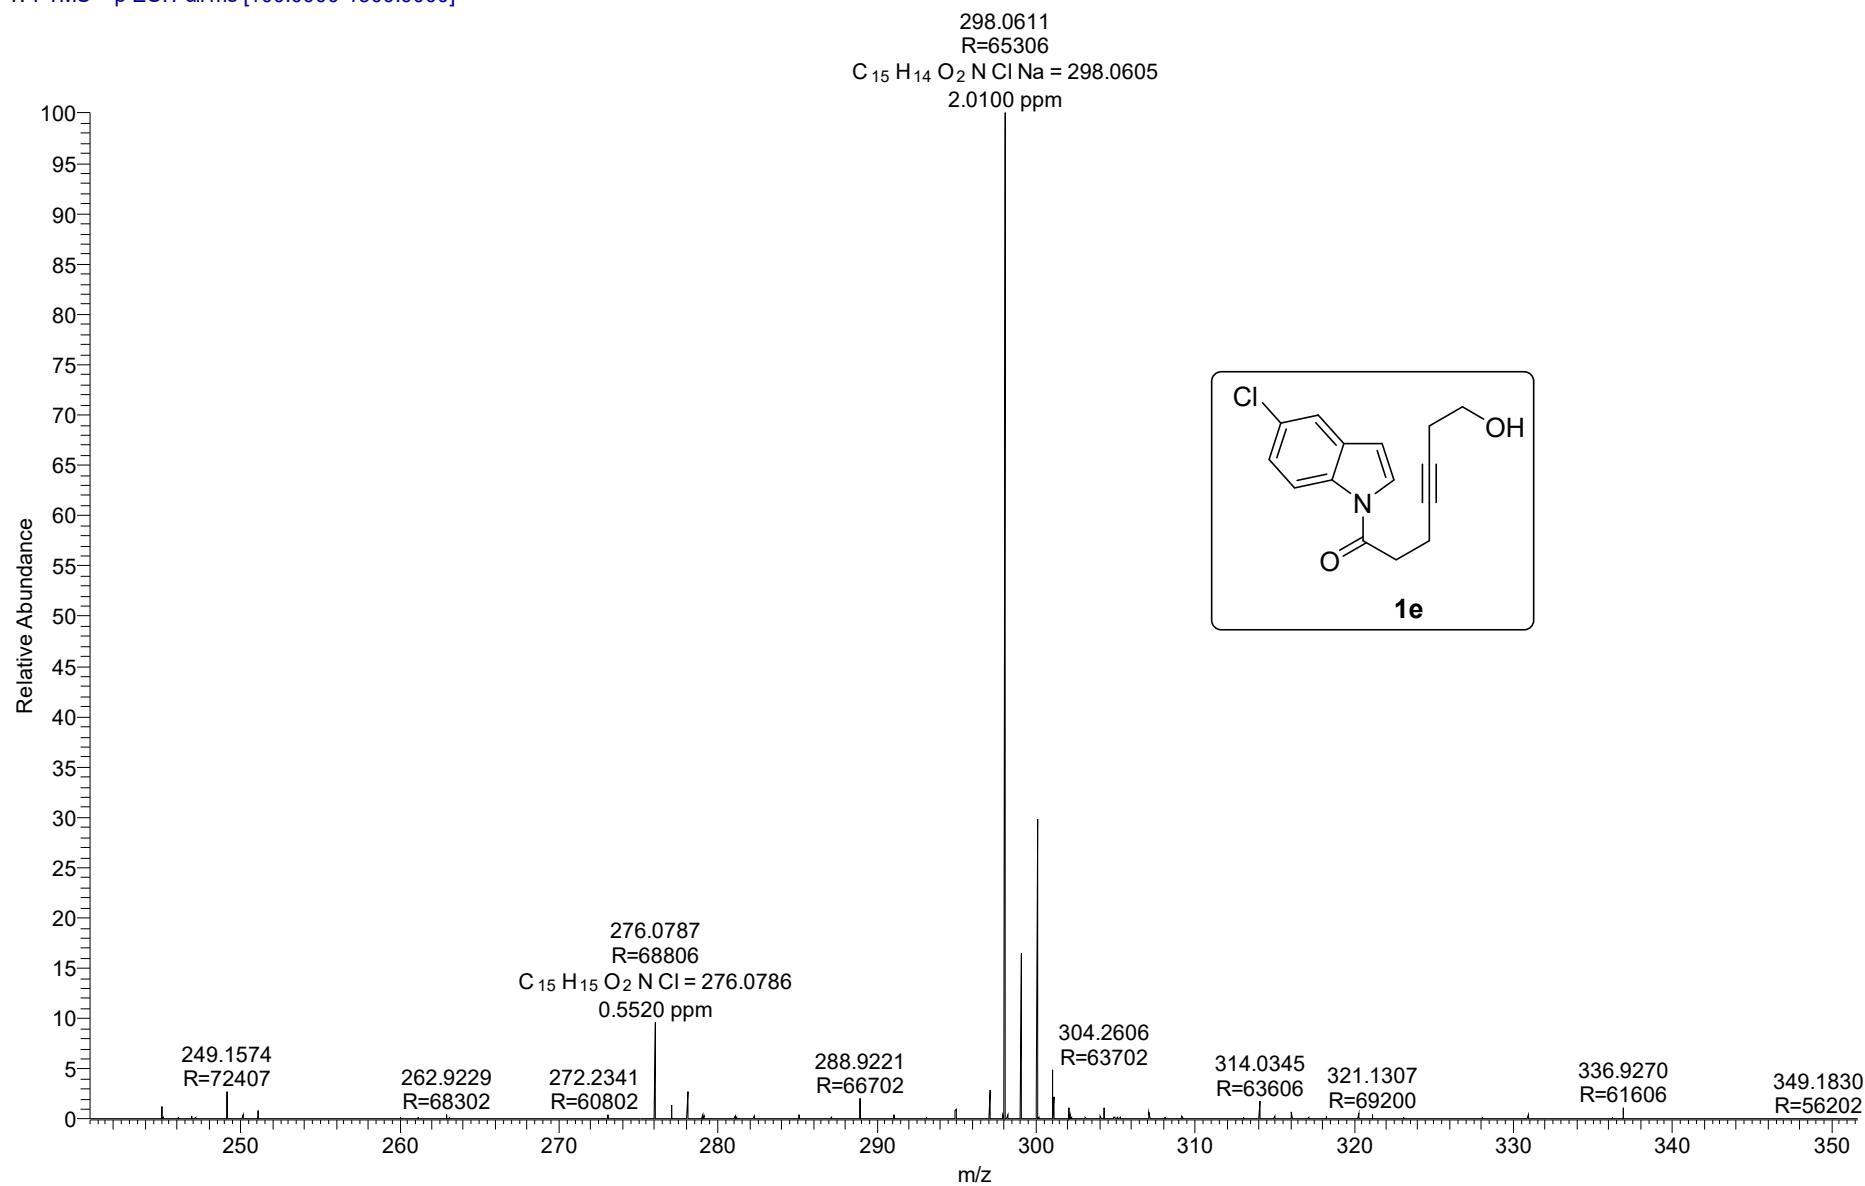

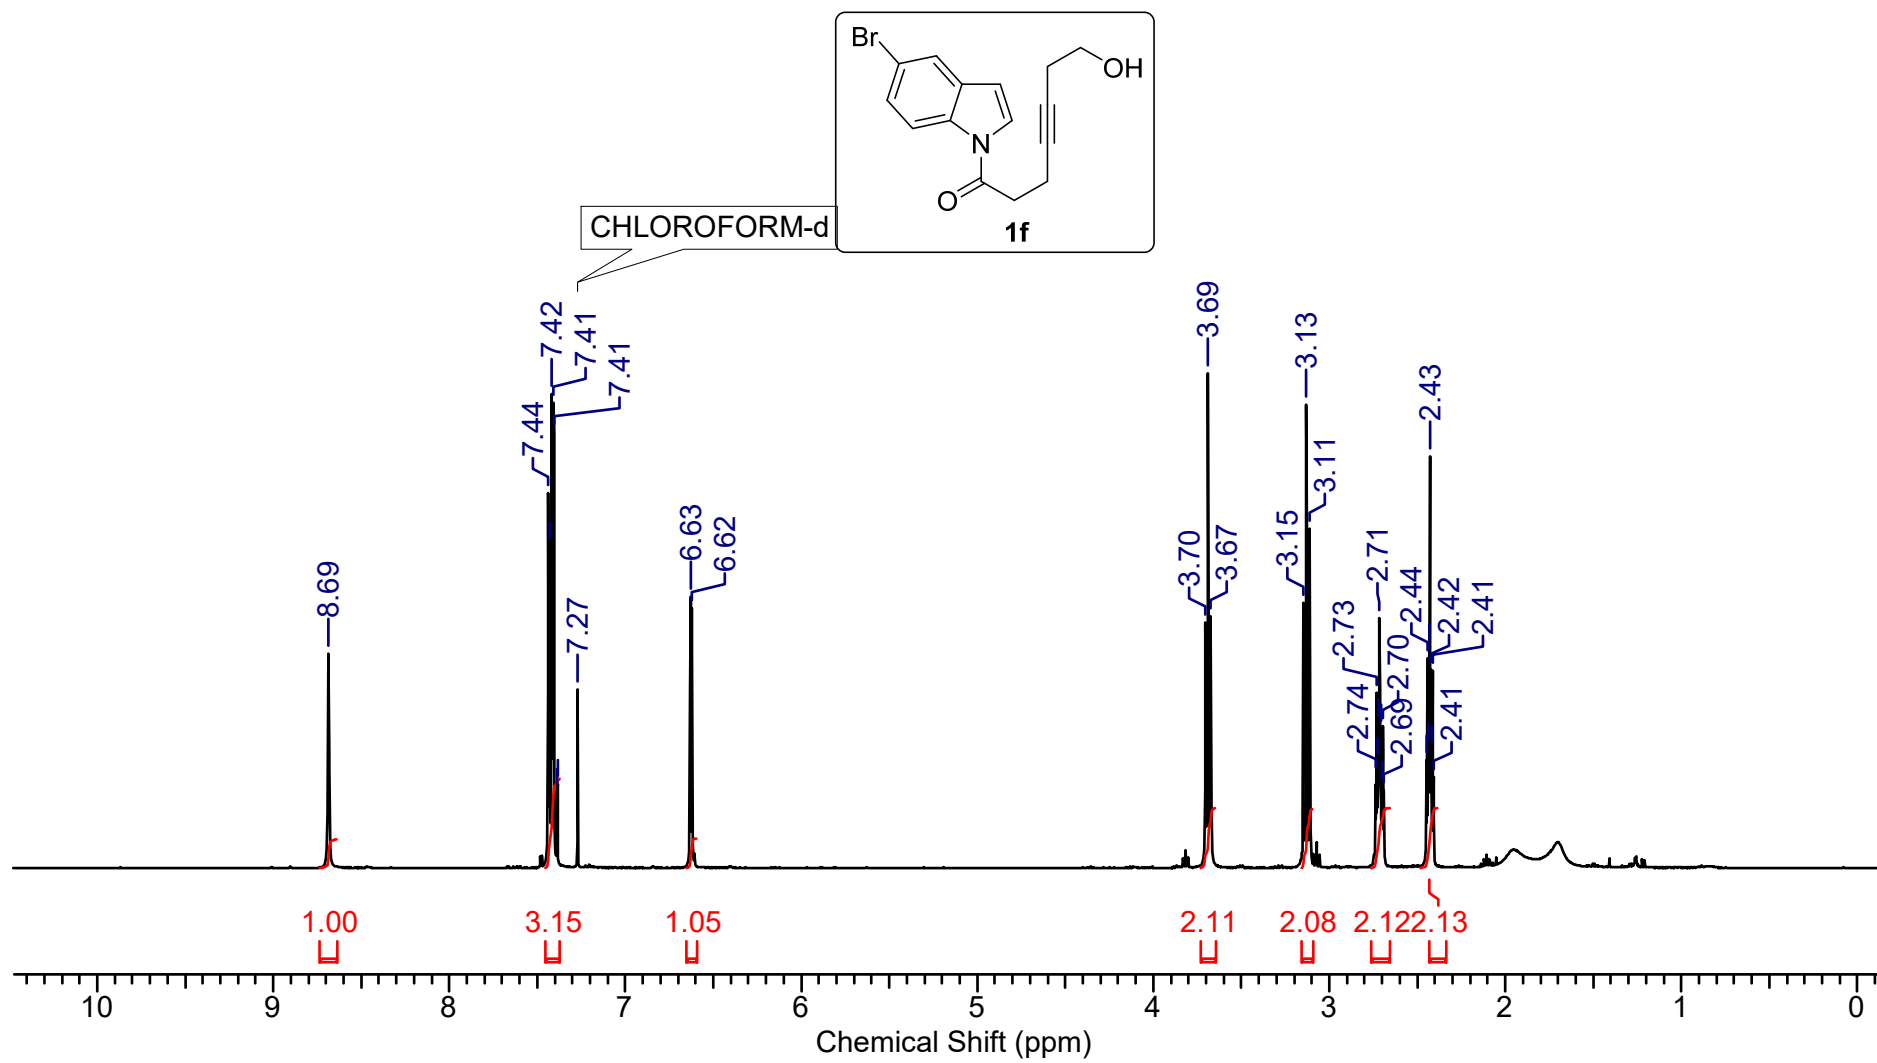

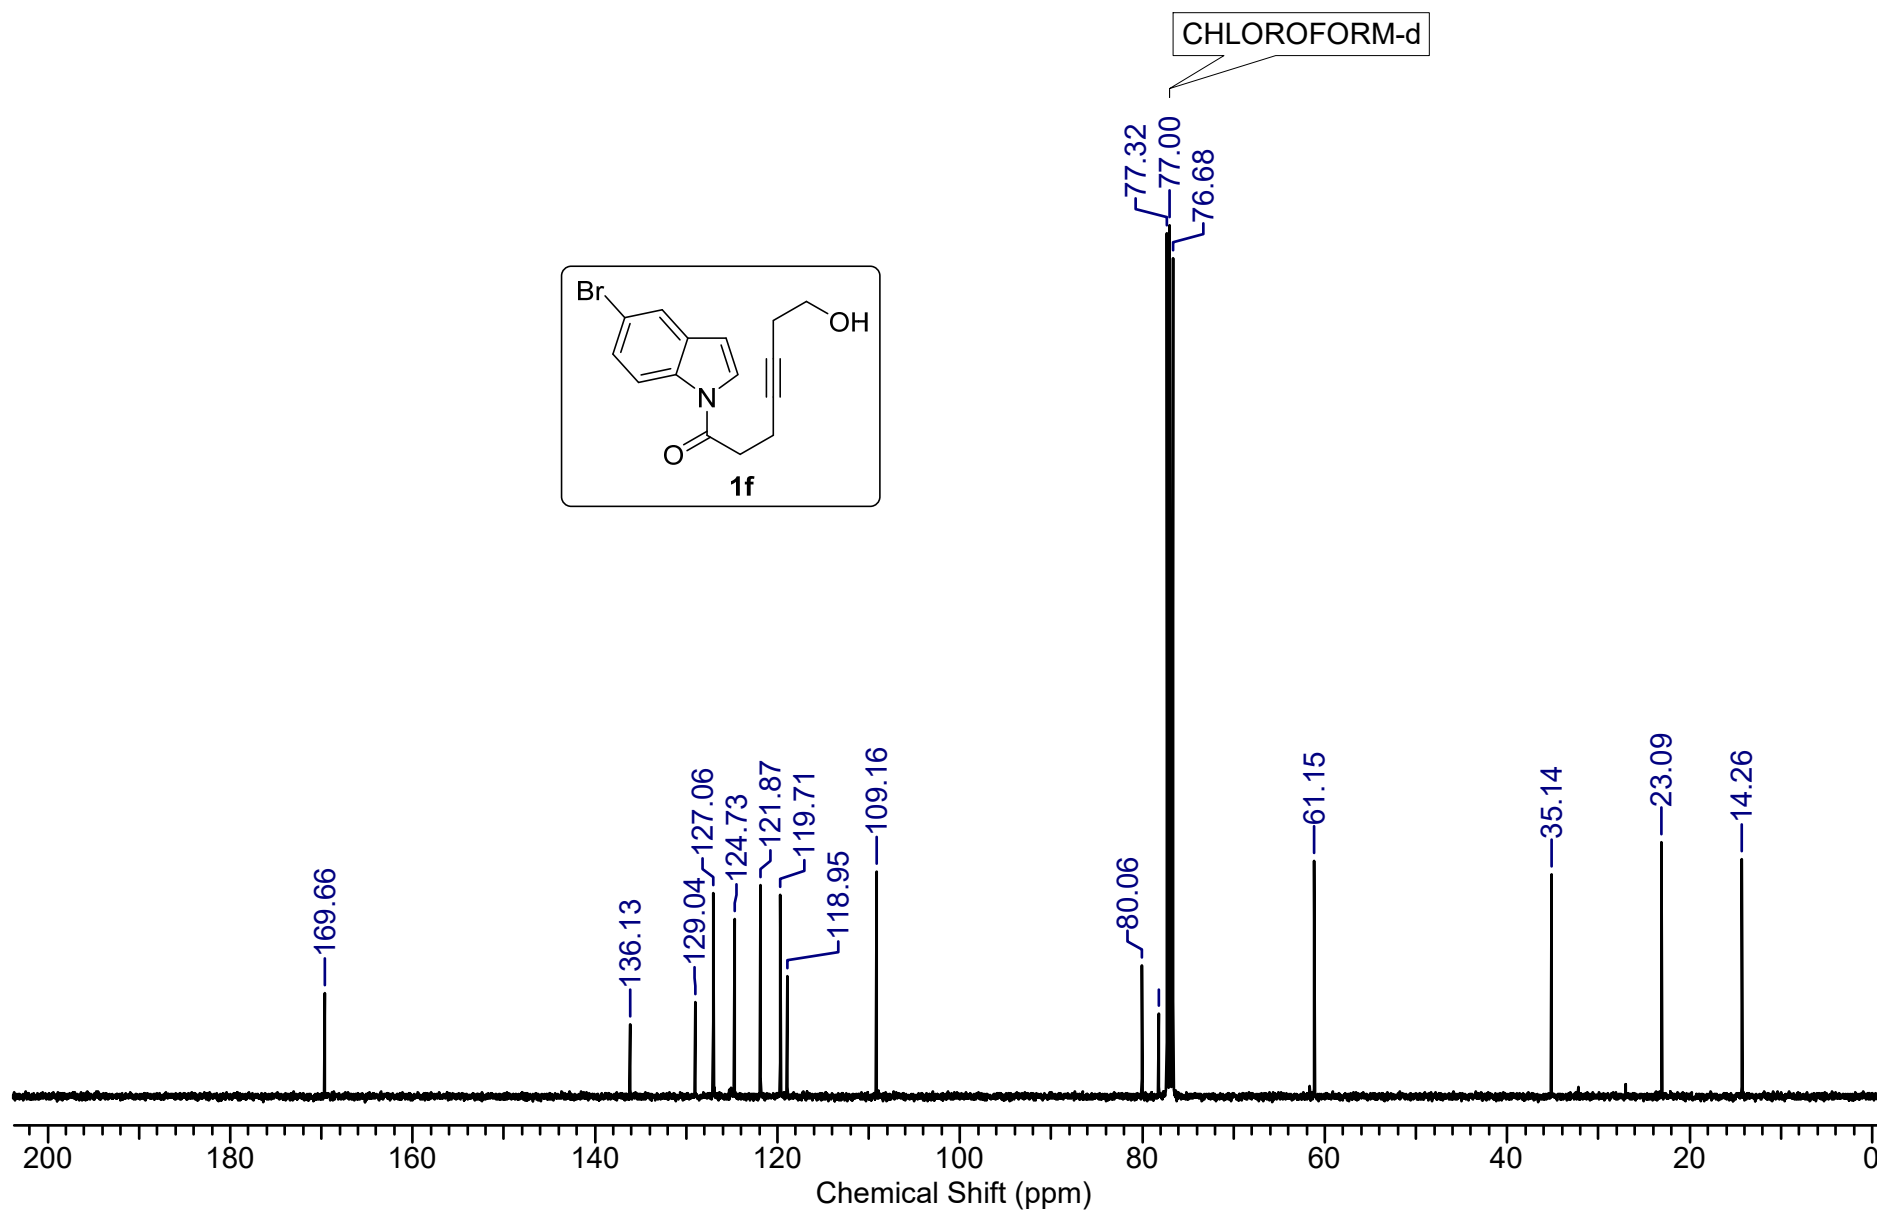



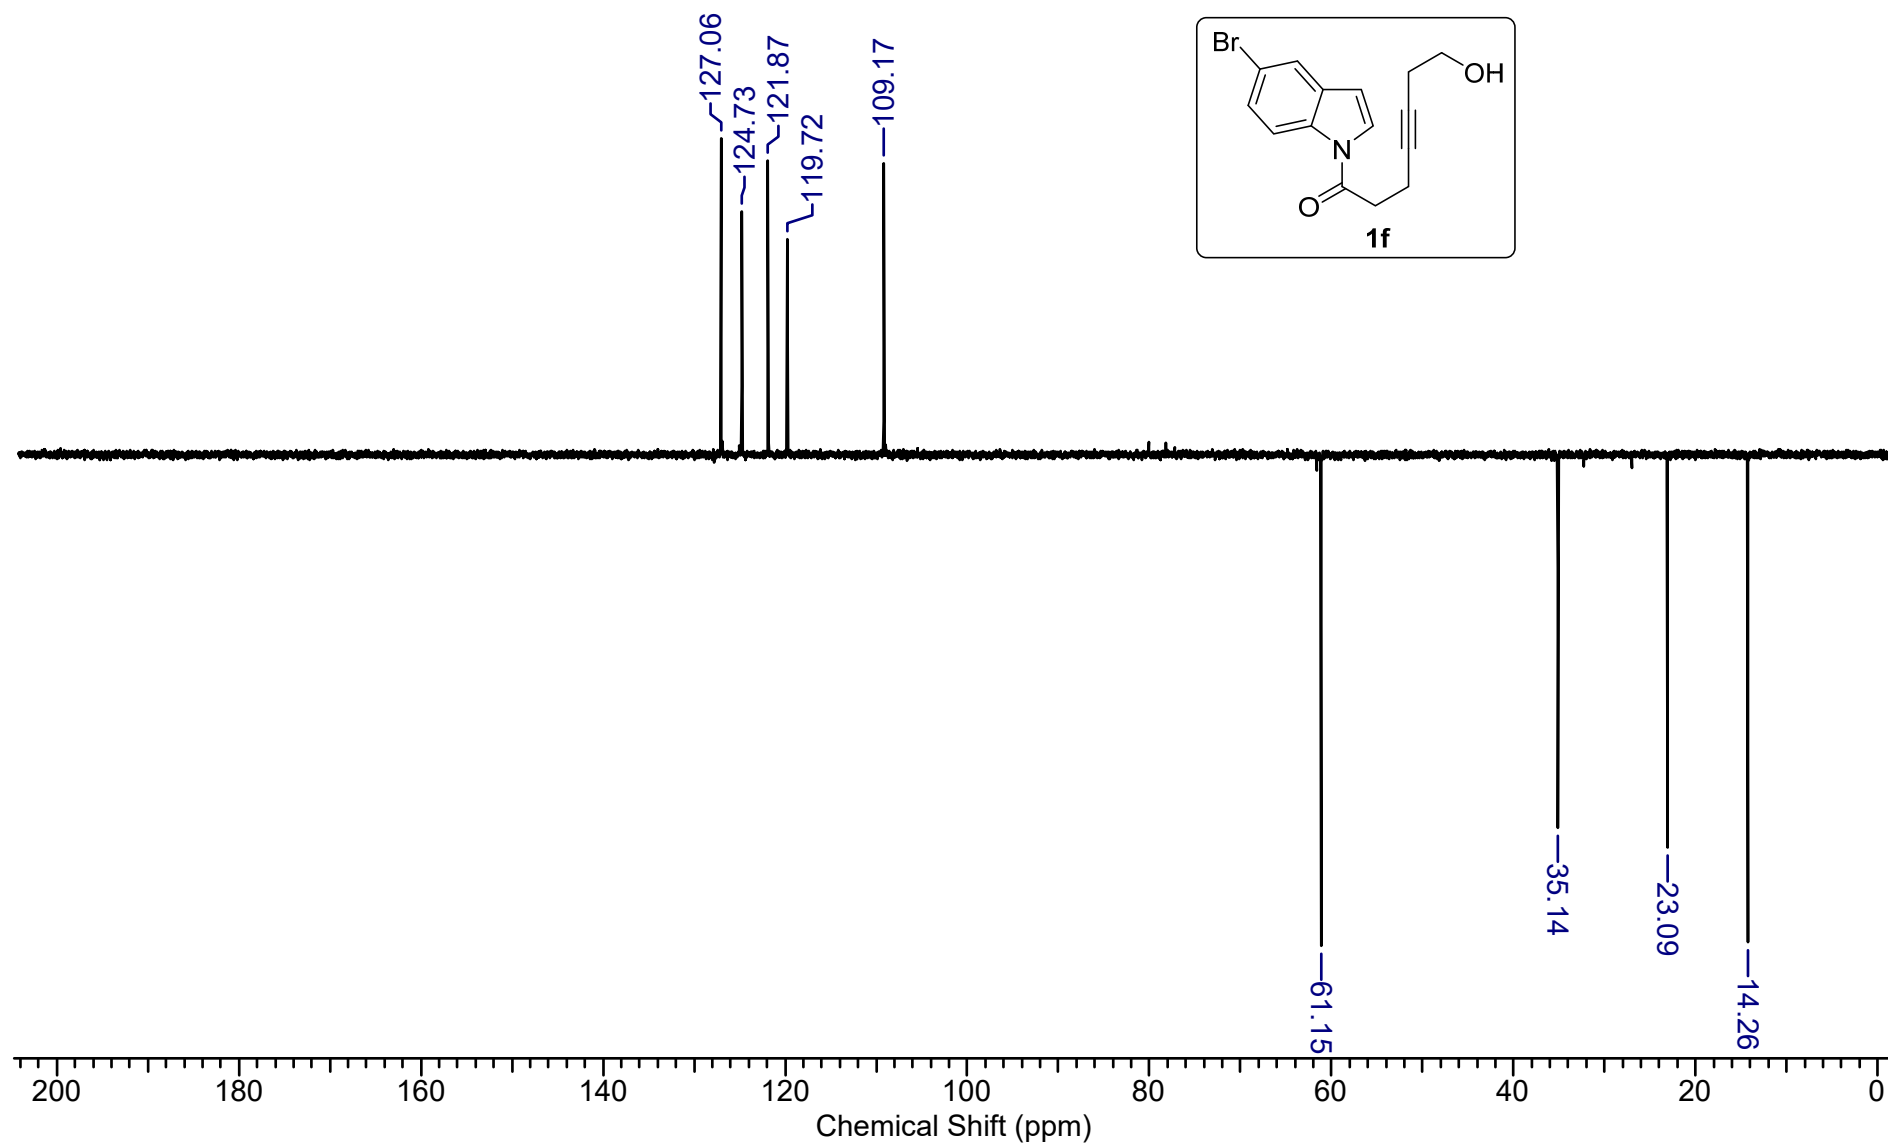

MS-6 #282 RT: 1.51 AV: 1 NL: 7.17E7  
T: FTMS + p ESI Full ms [100.0000-1500.0000]

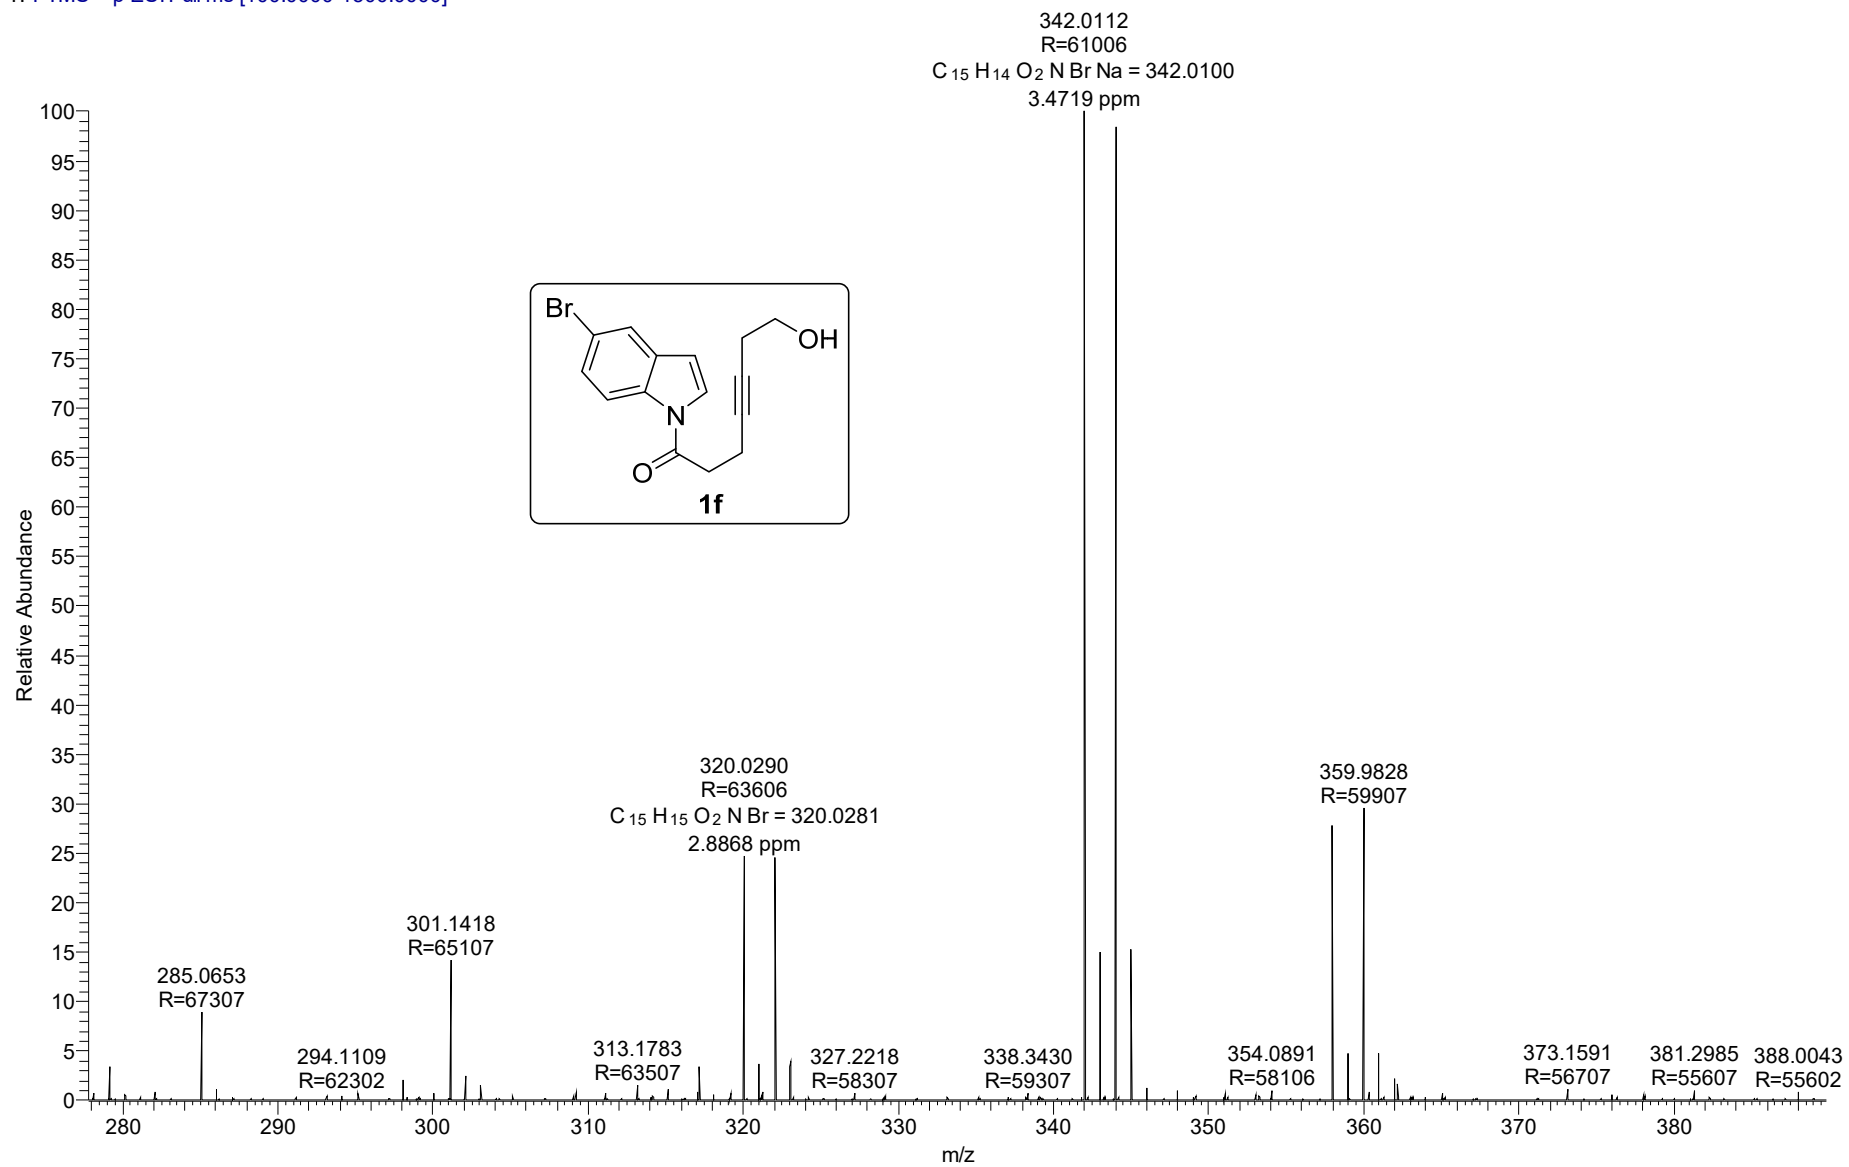

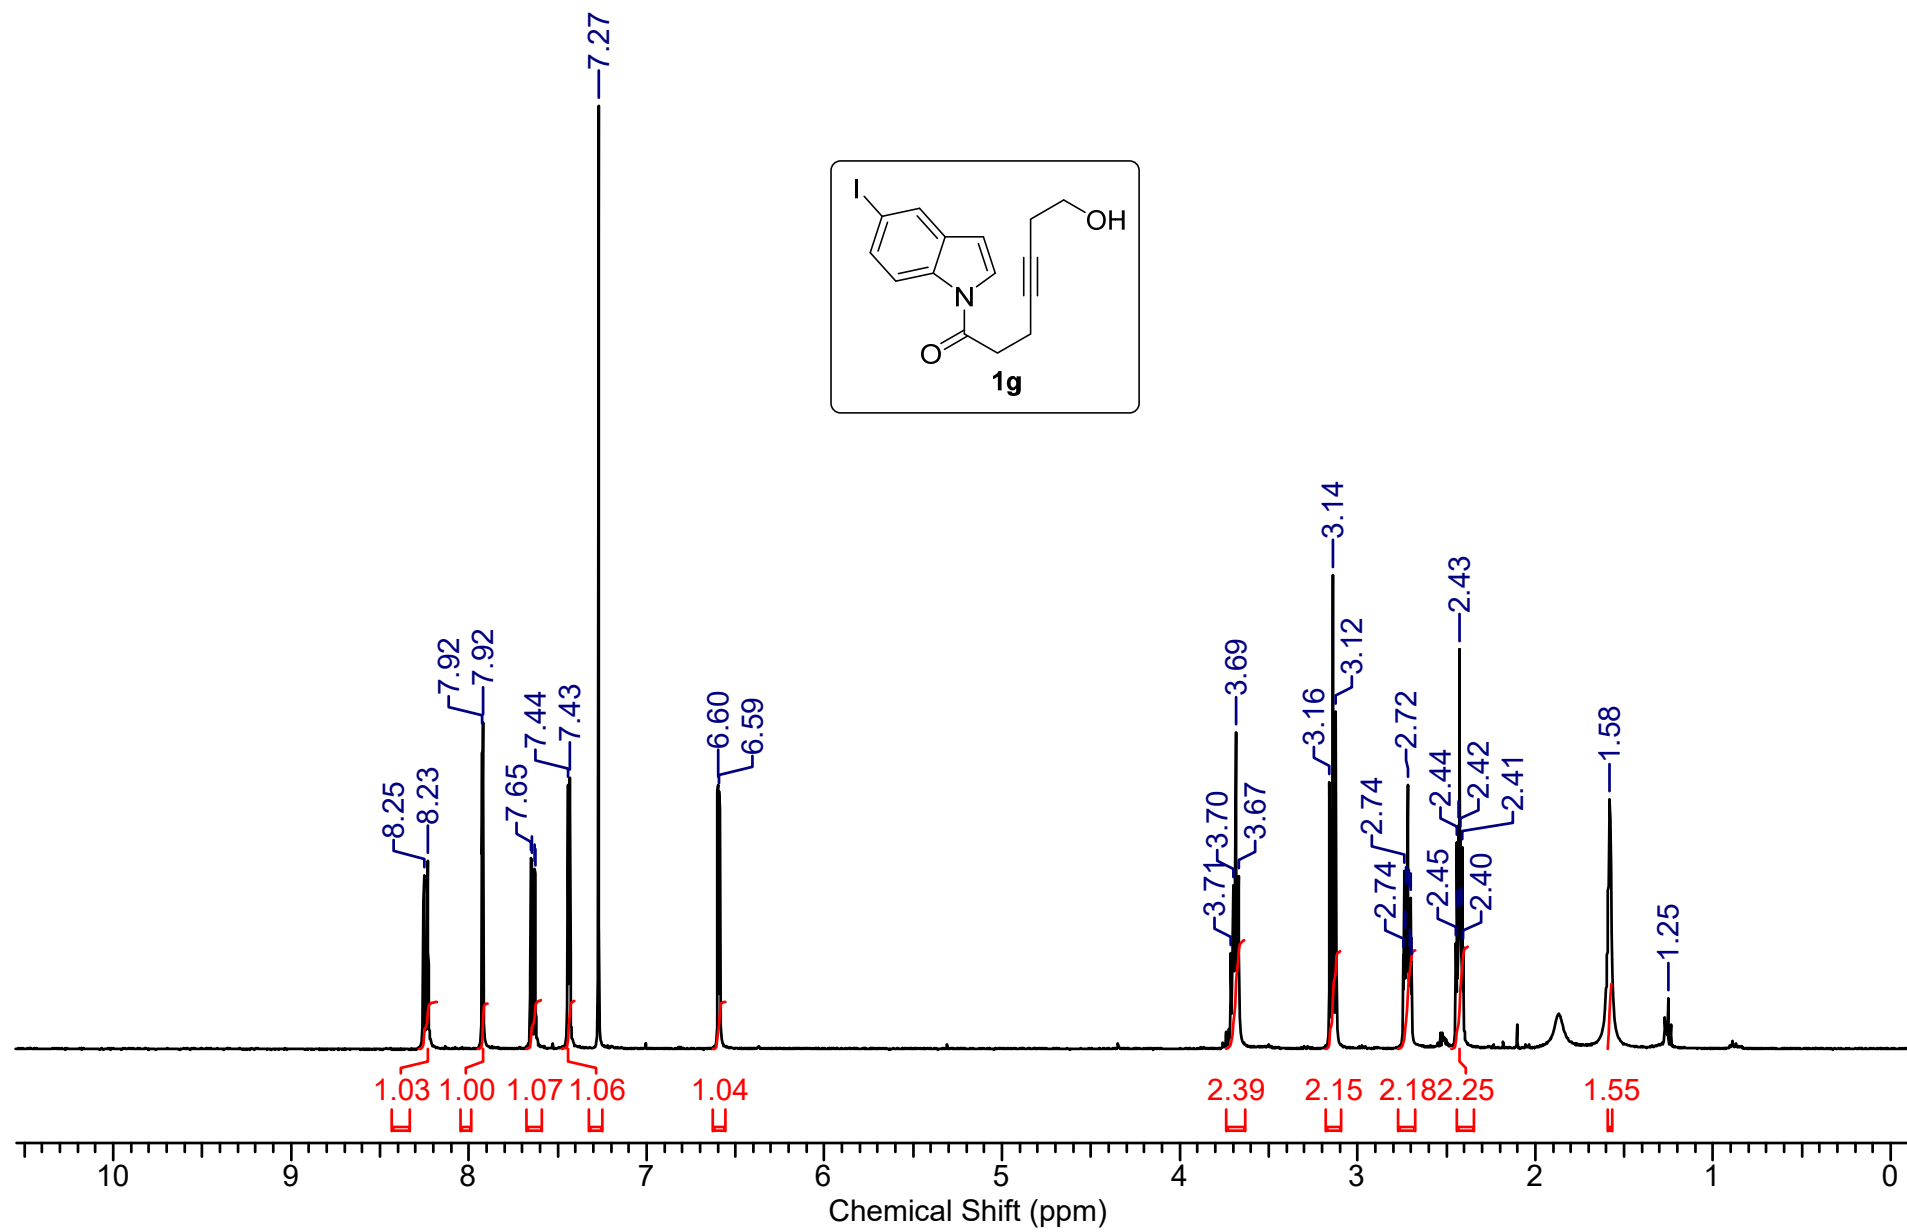

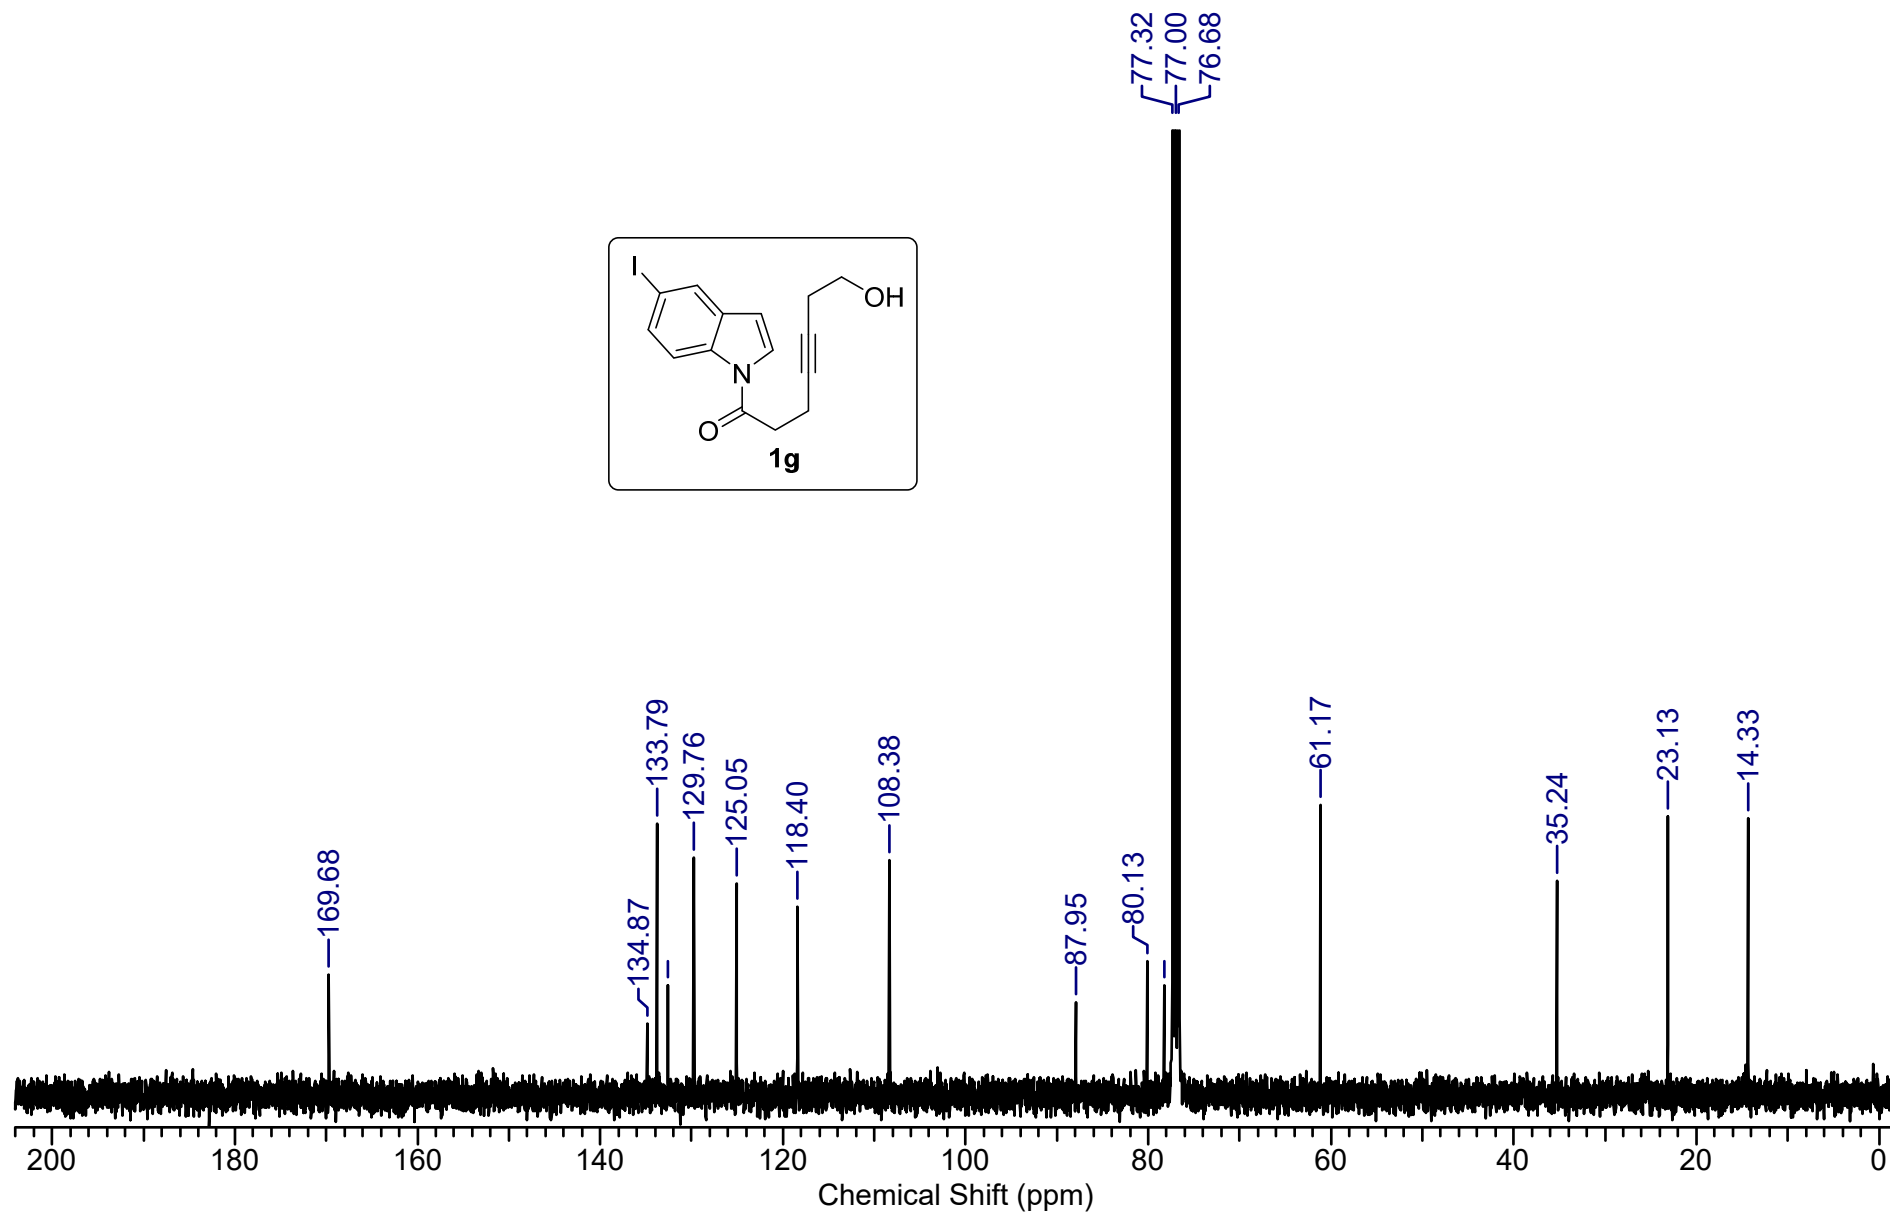

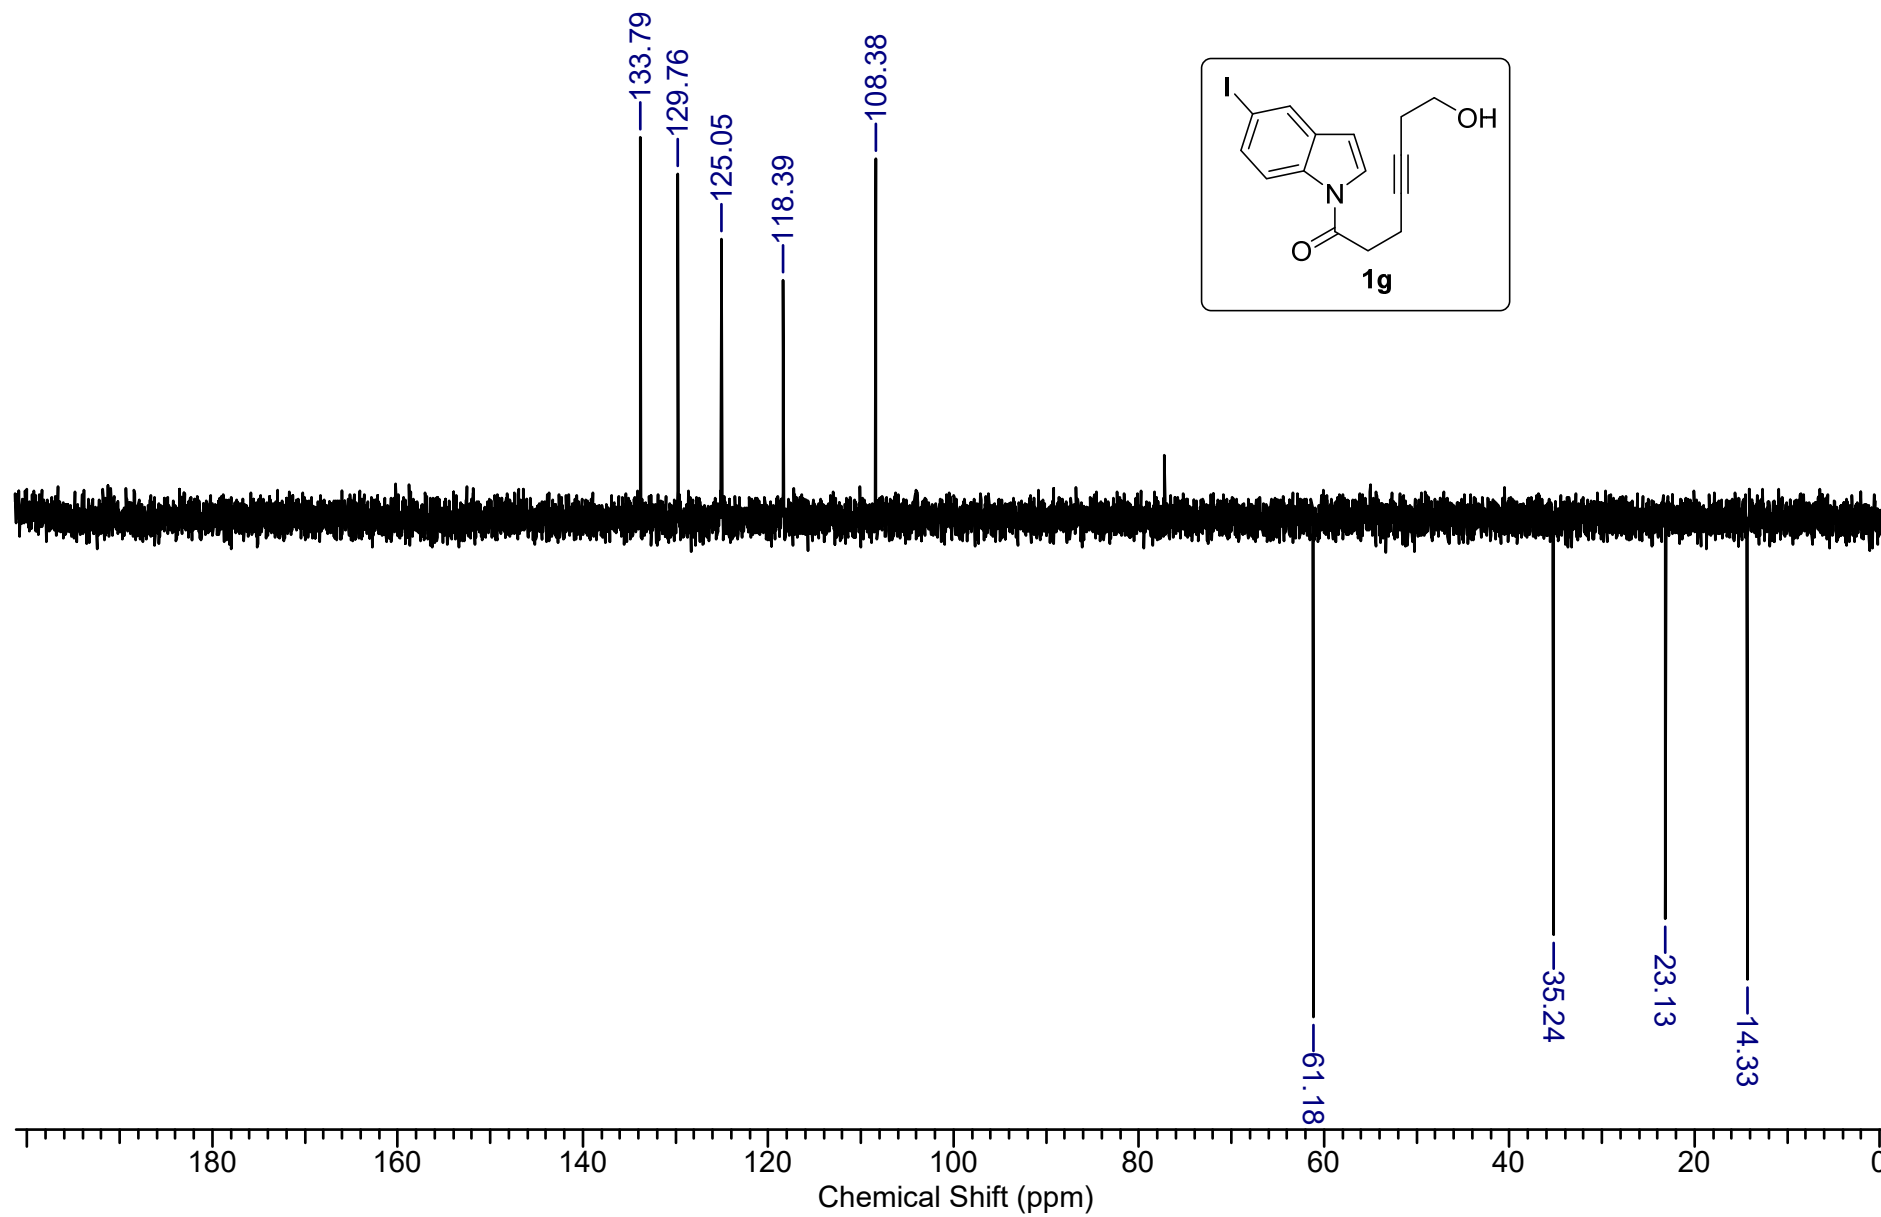

MS-7 #305 RT: 1.63 AV: 1 NL: 9.82E6  
T: FTMS + p ESI Full ms [100.0000-1500.0000]

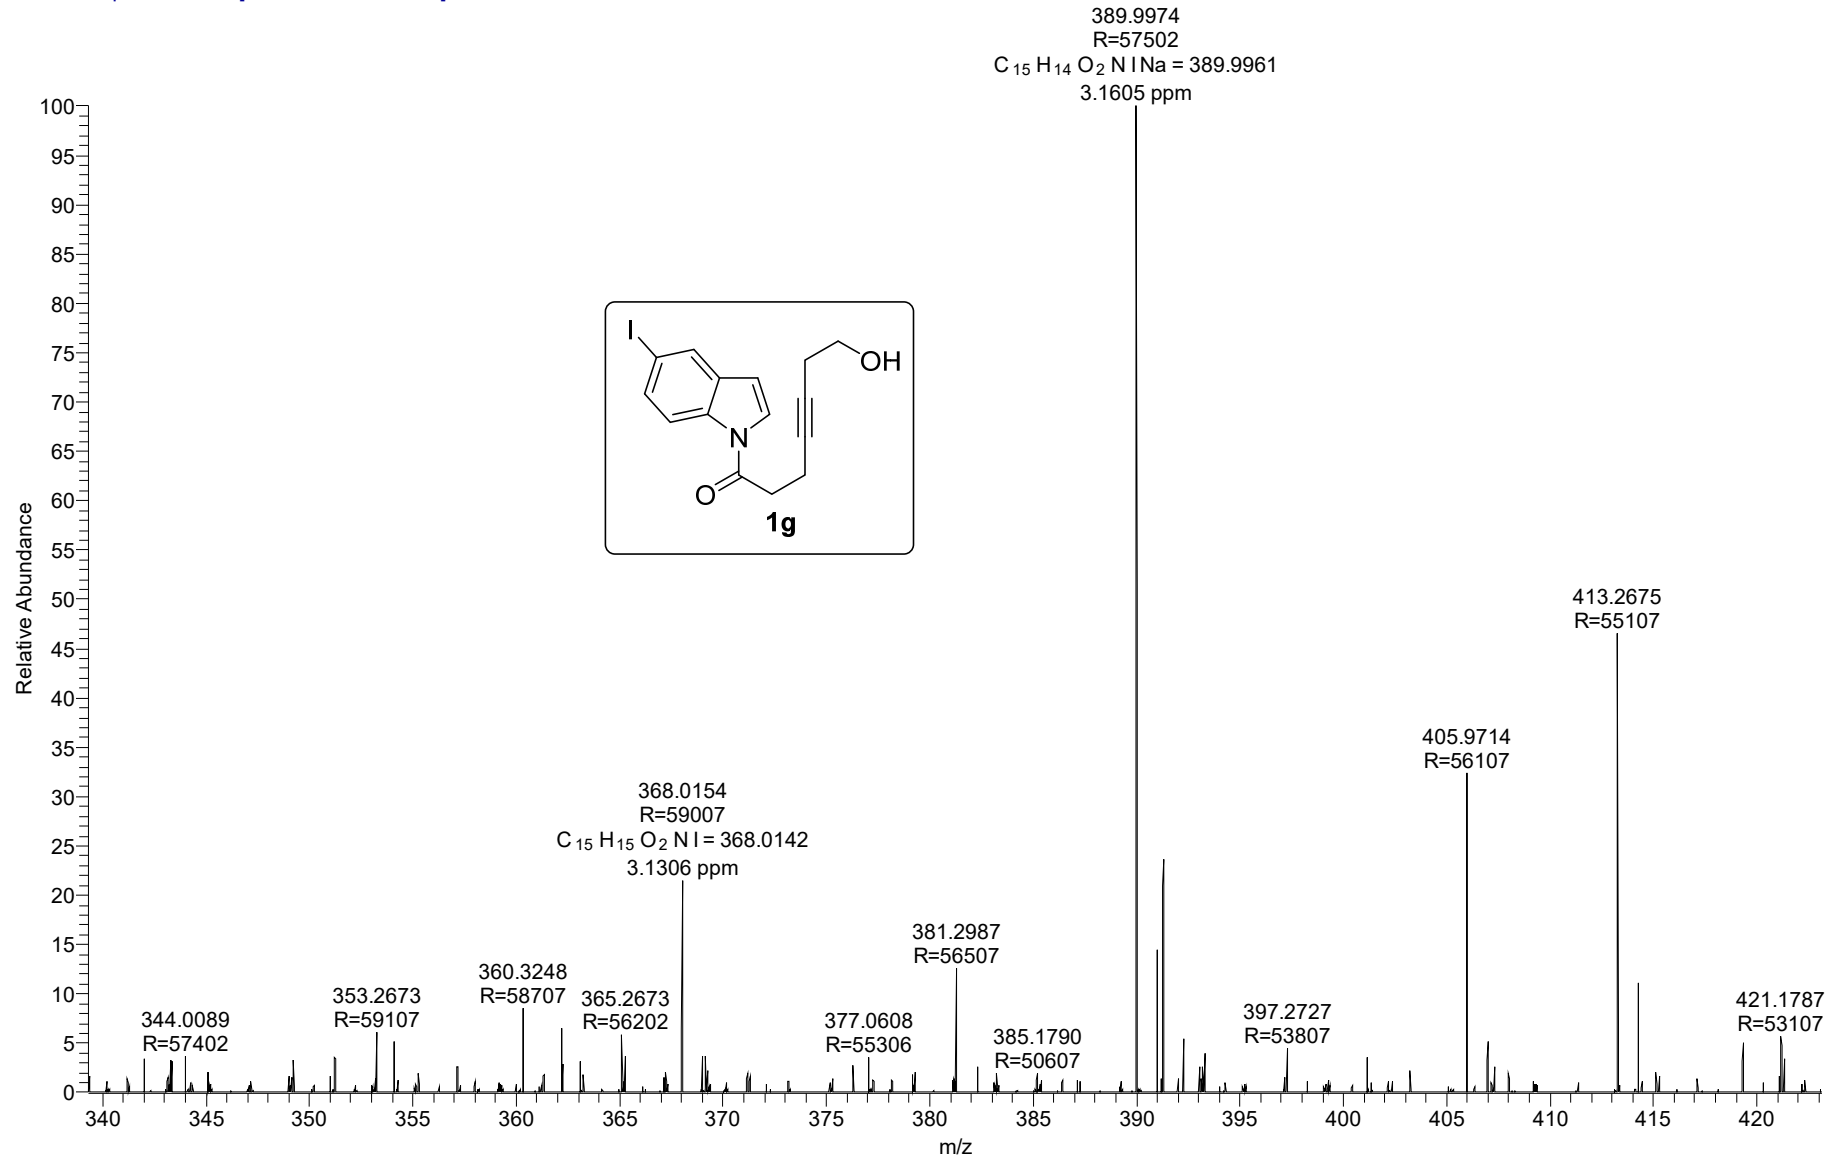

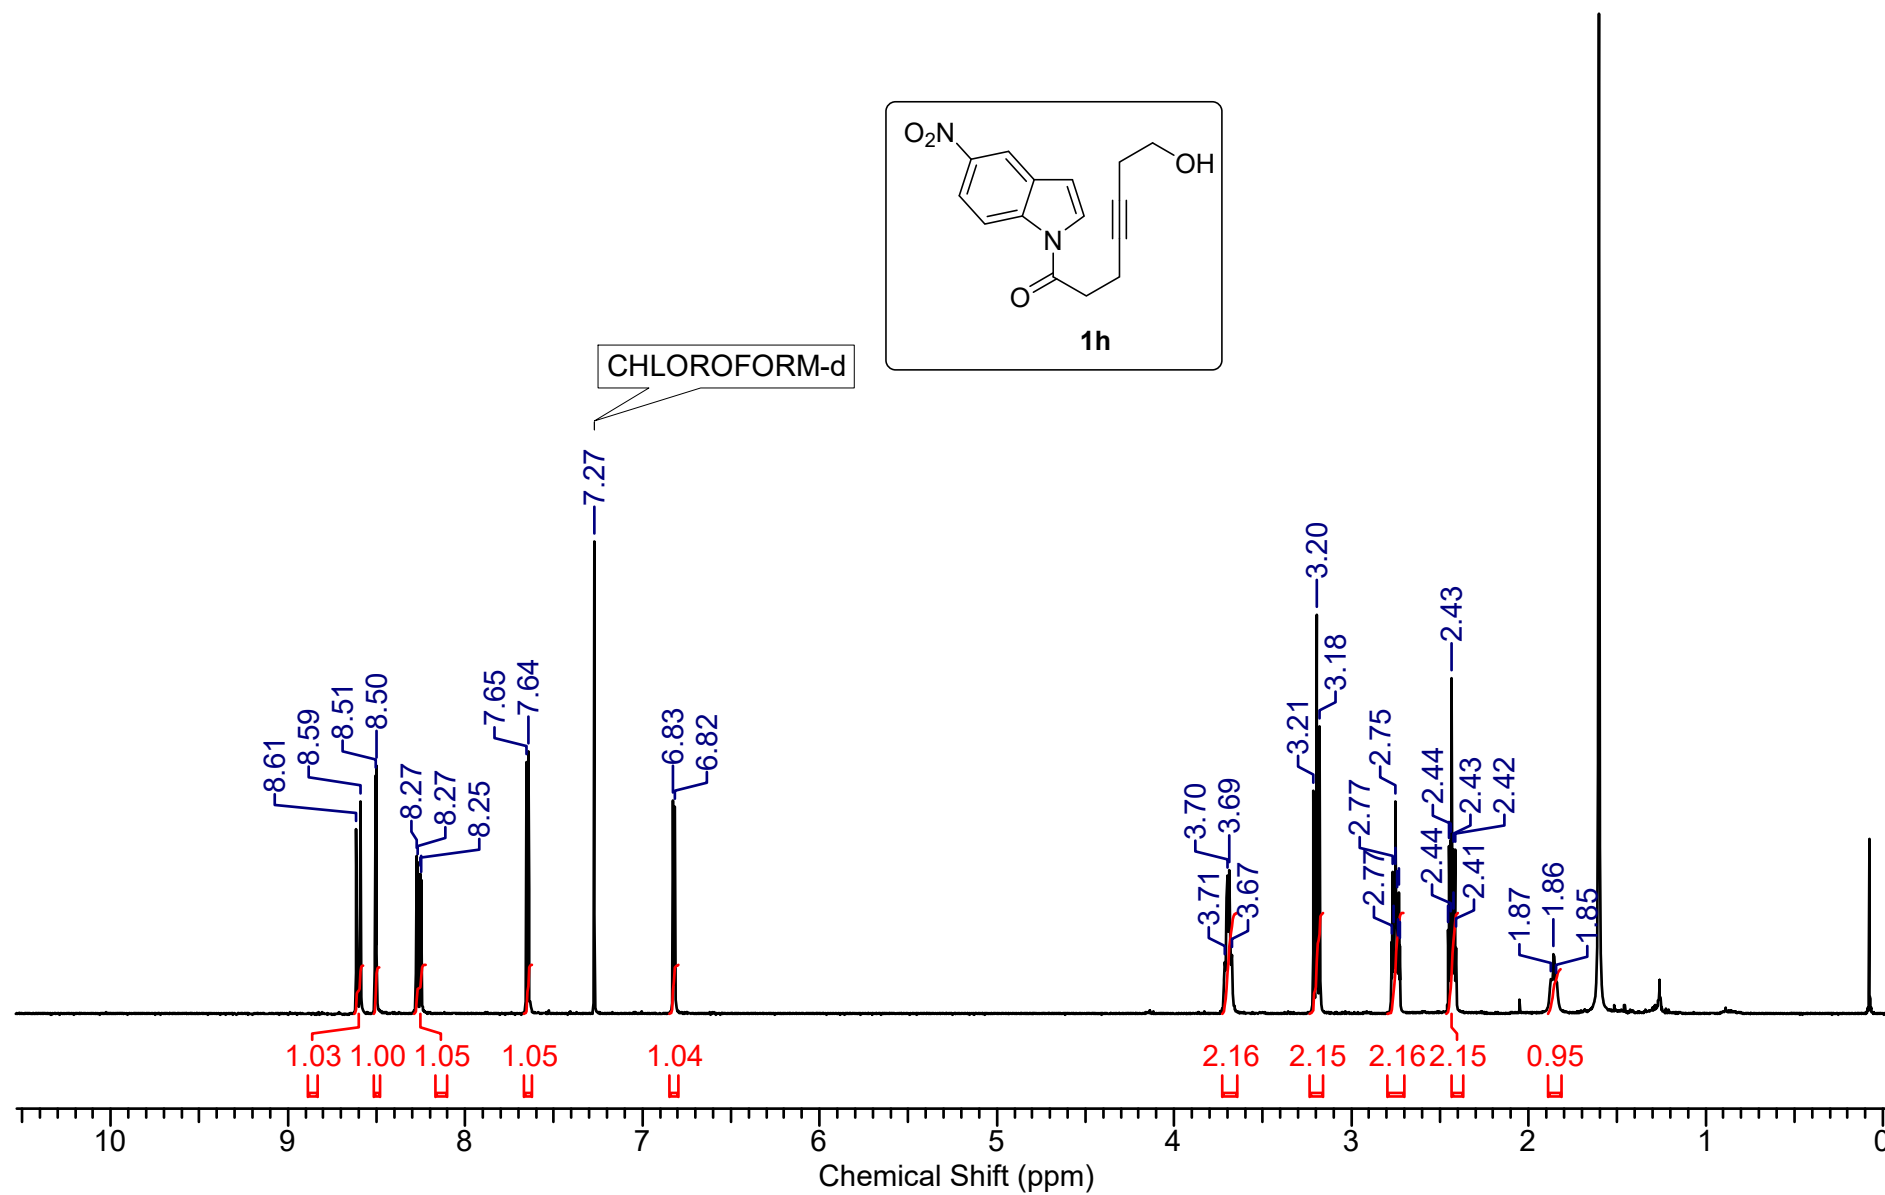

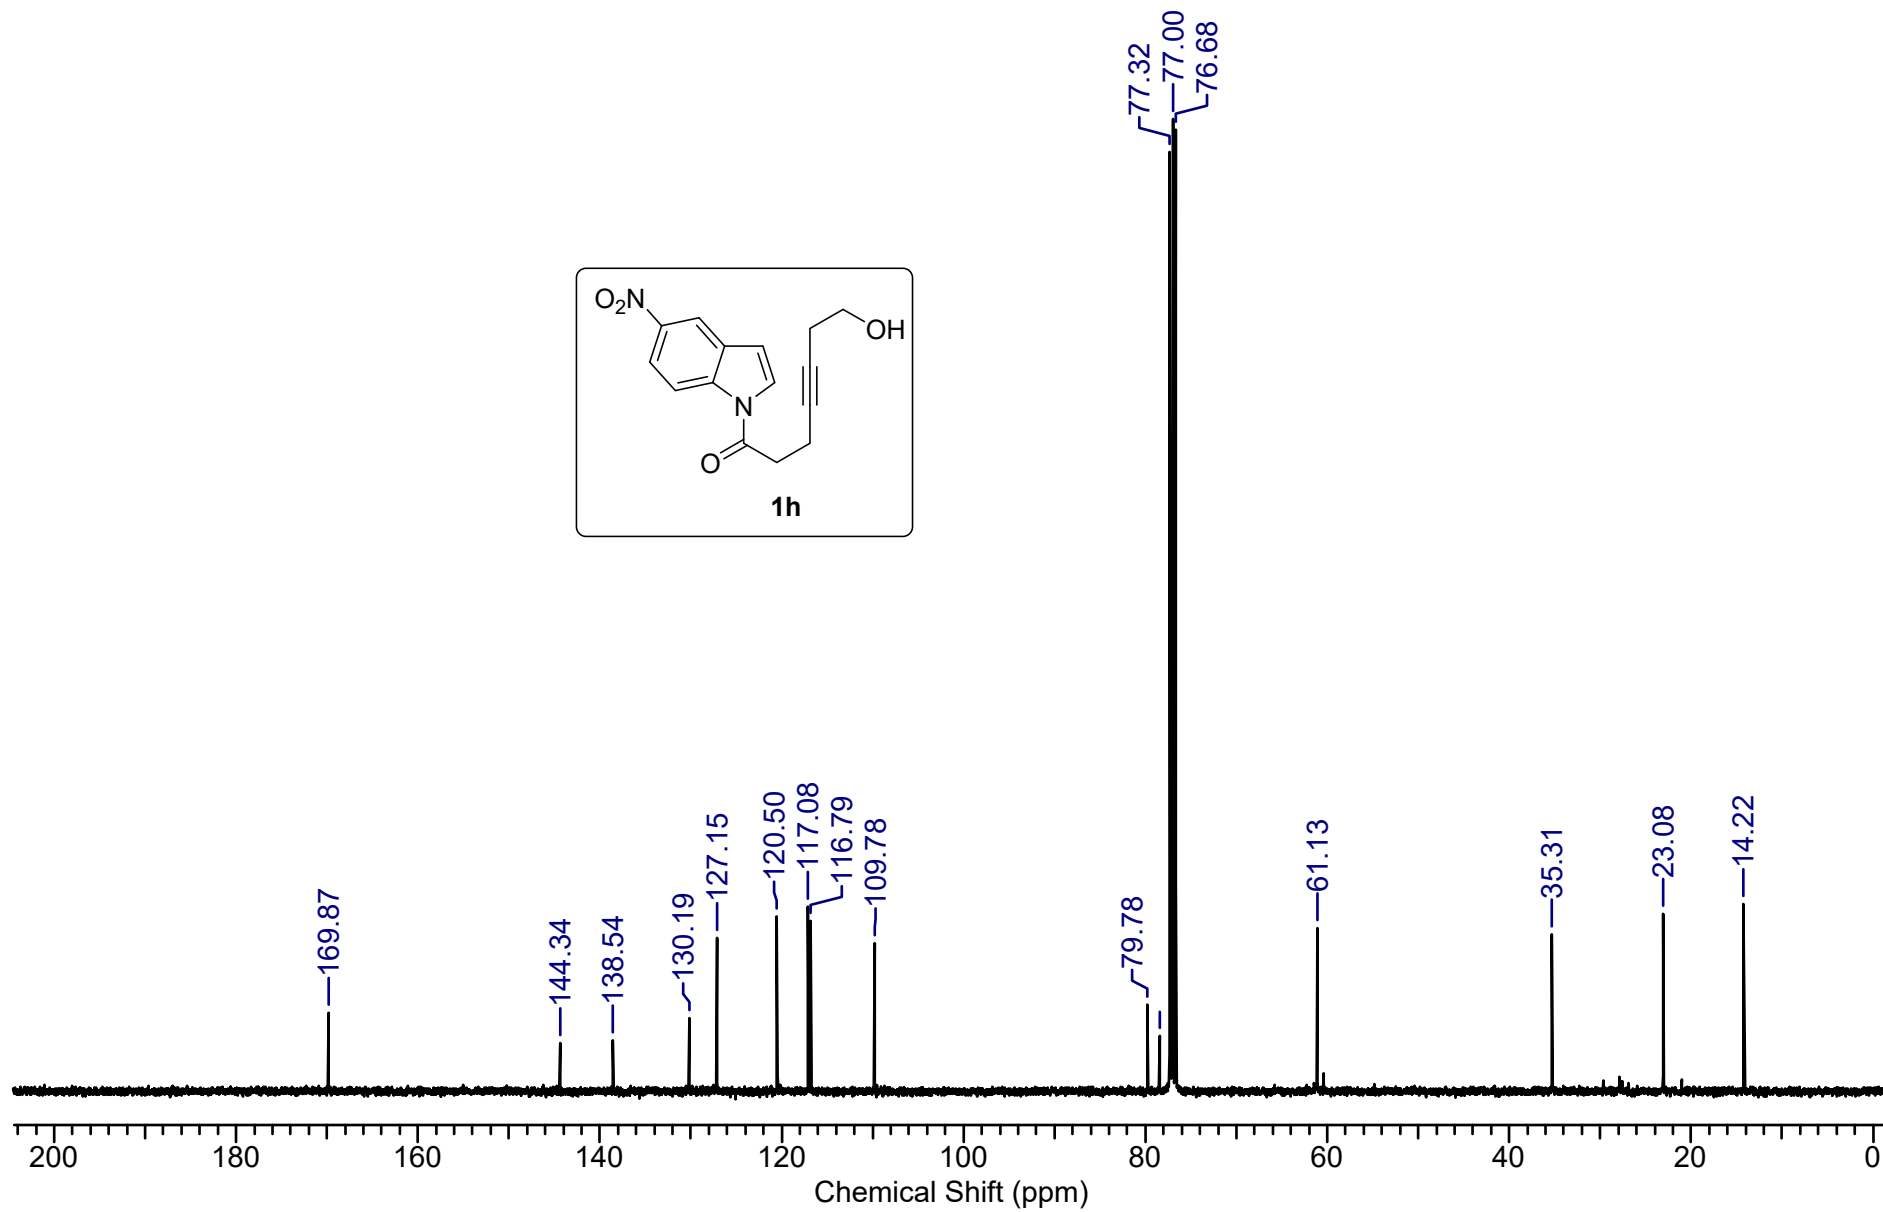



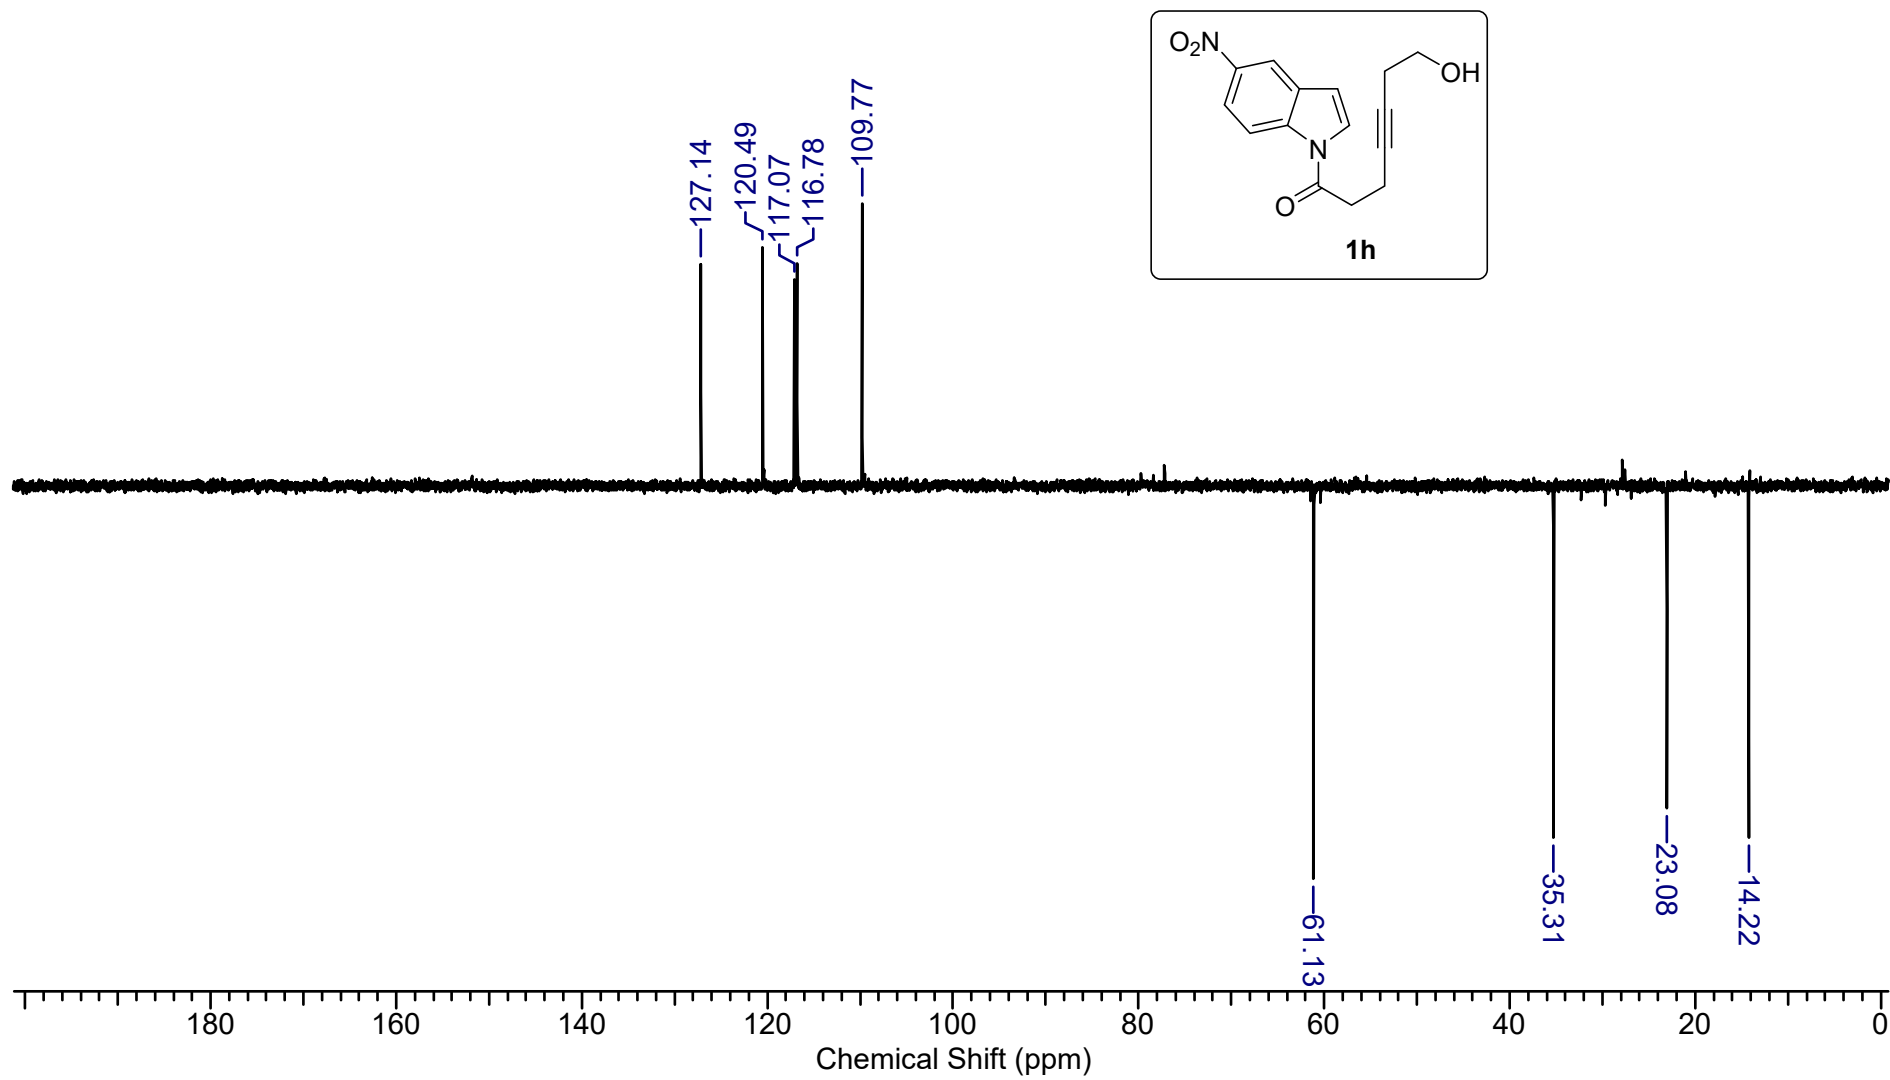

MS-8 #268 RT: 1.44 AV: 1 NL: 5.49E7  
T: FTMS + p ESI Full ms [100.0000-1500.0000]

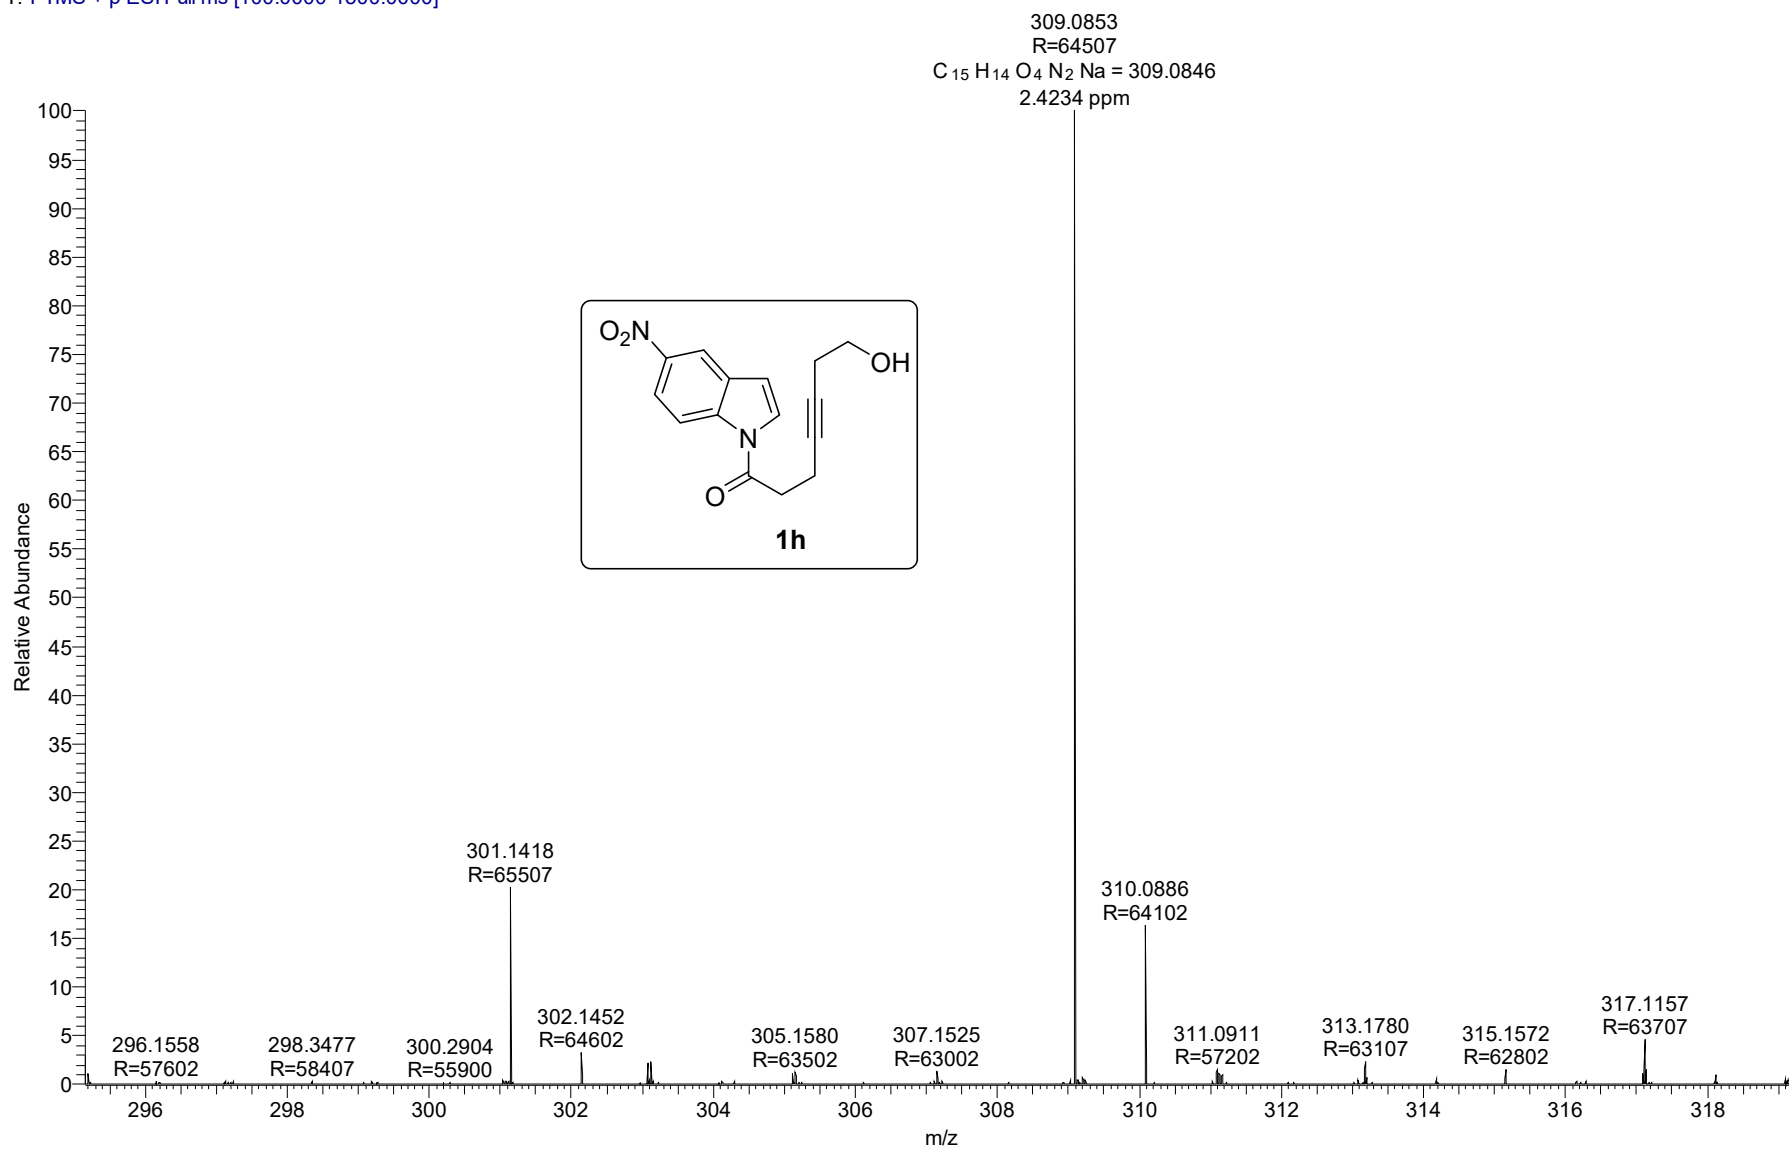

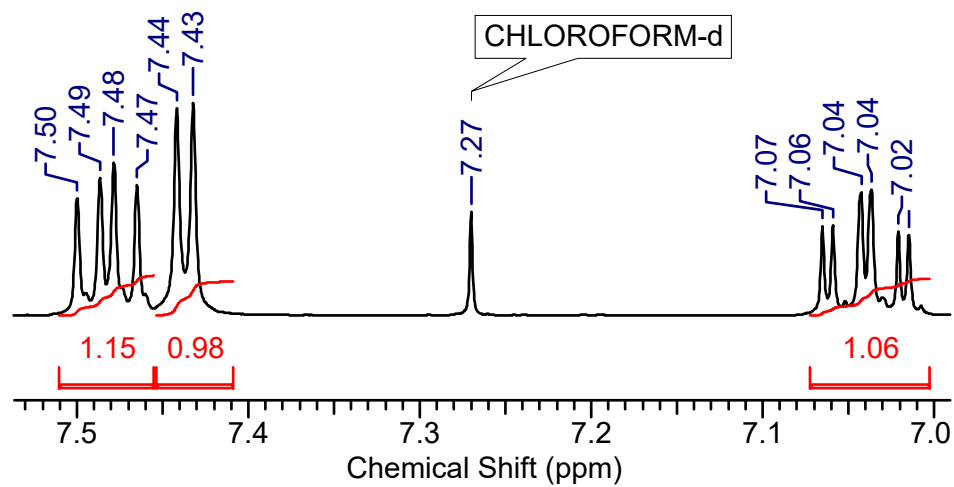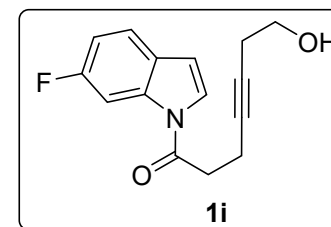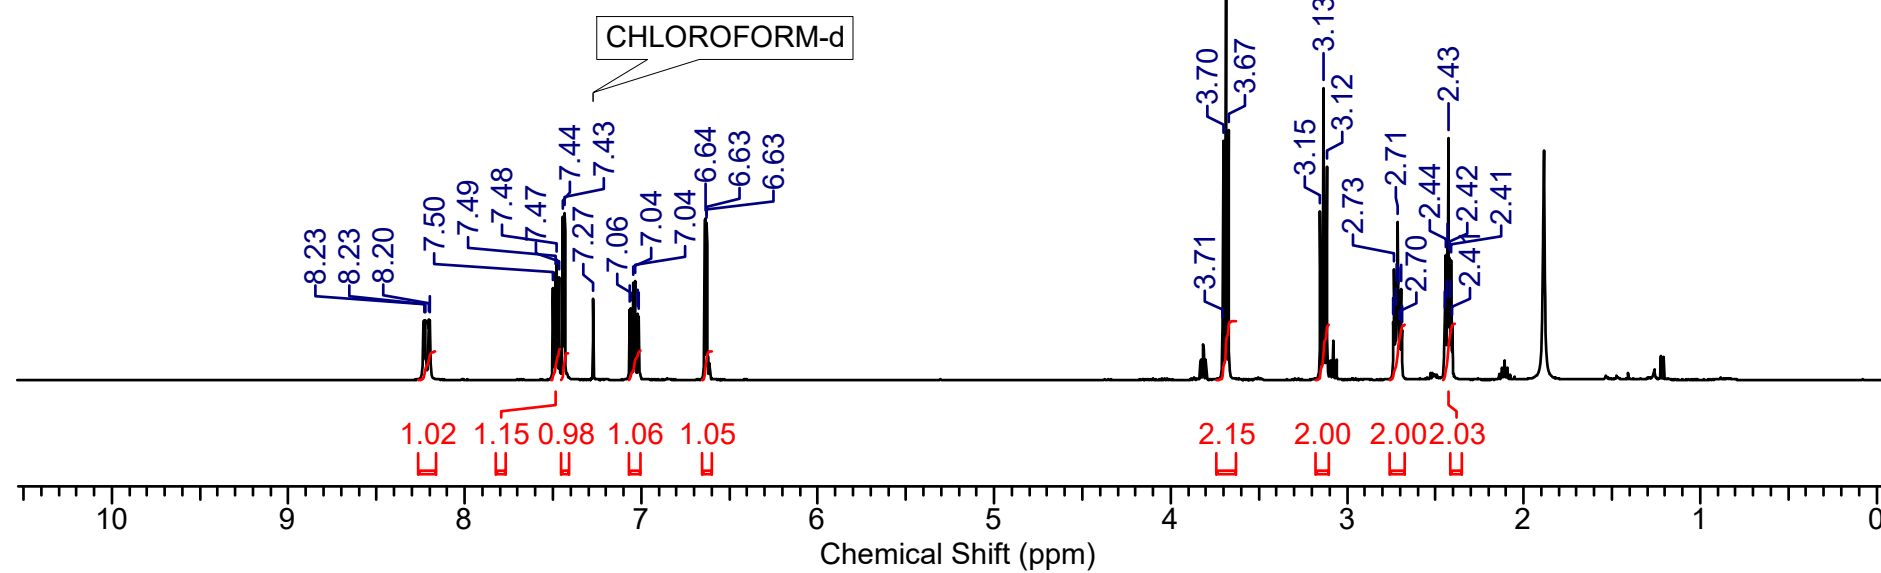

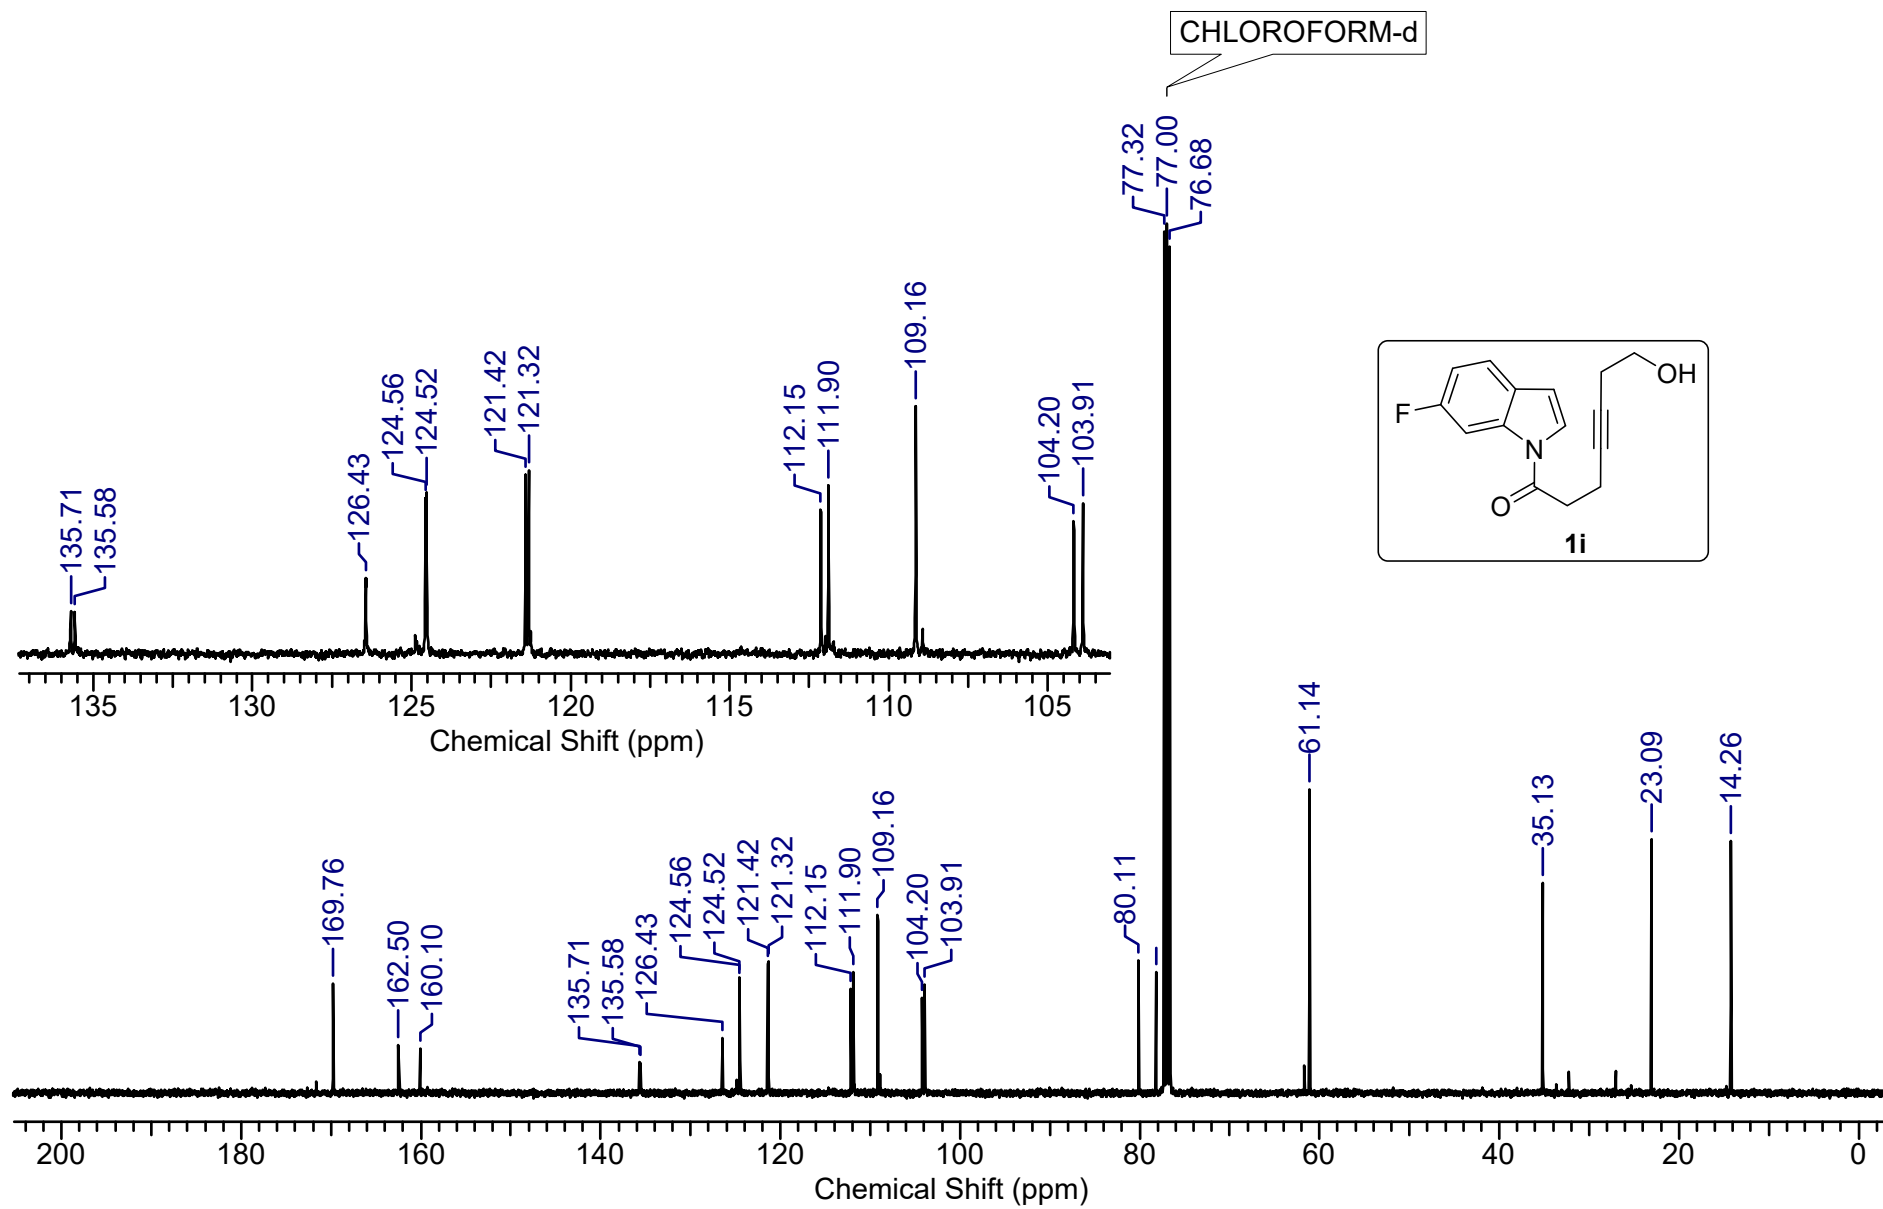

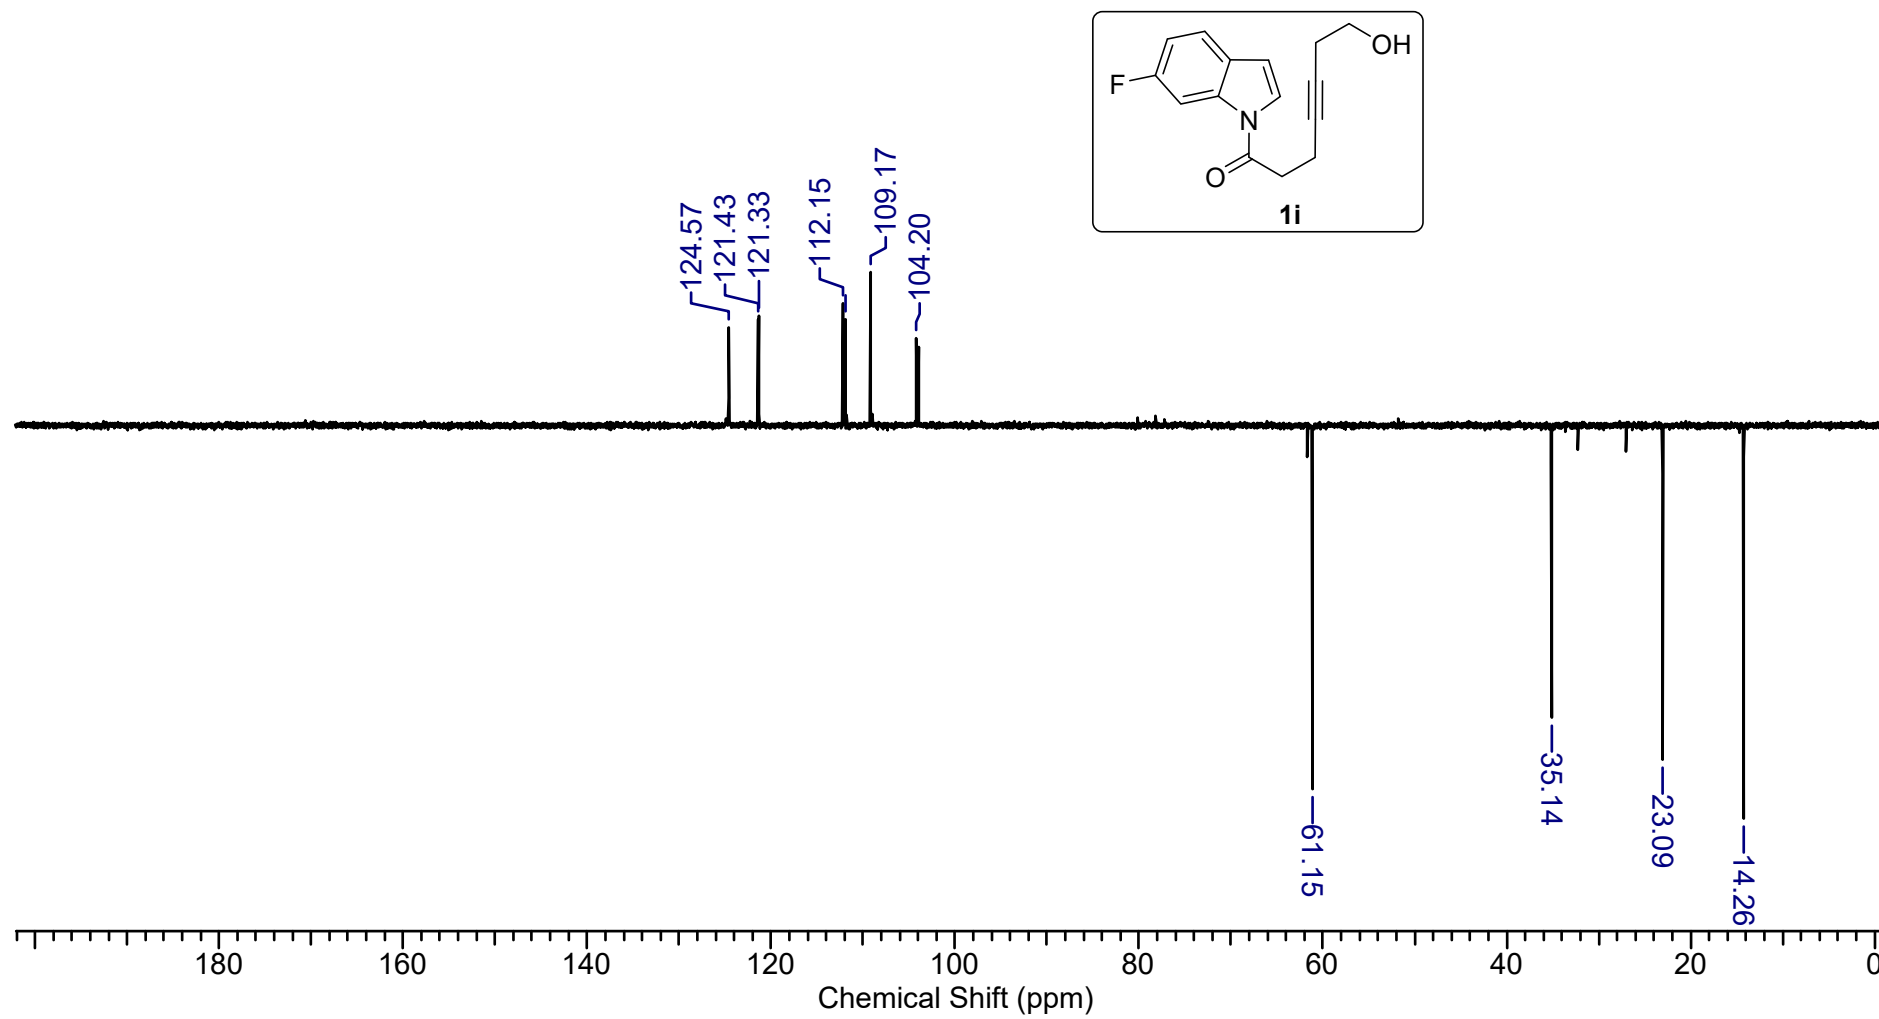

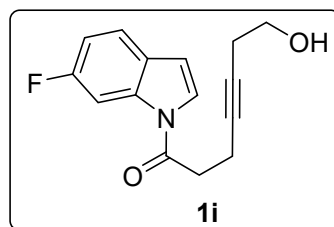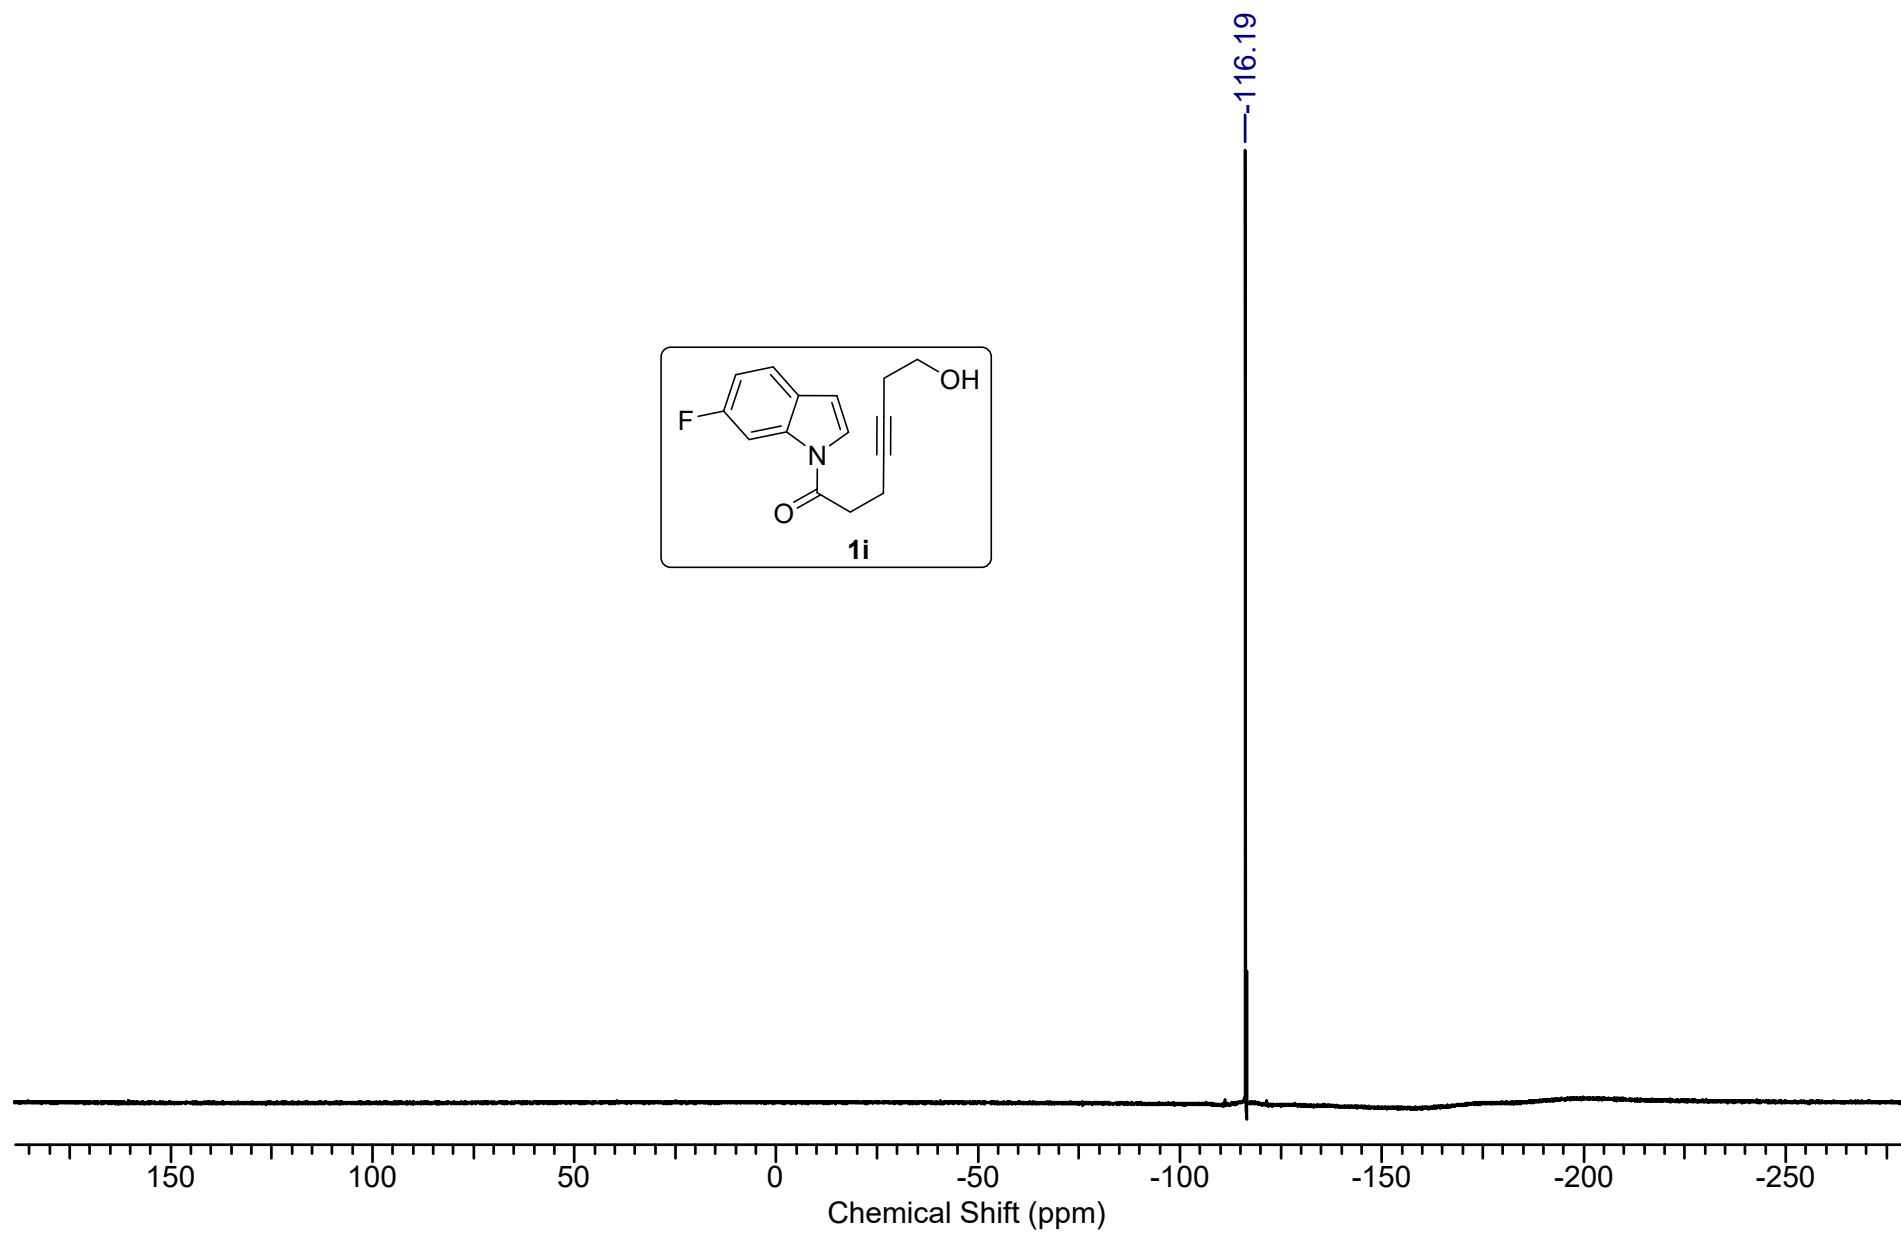

MSH-42 #260 RT: 1.42 AV: 1 NL: 8.17E7  
T: FTMS + p ESI Full ms [100.0000-1500.0000]

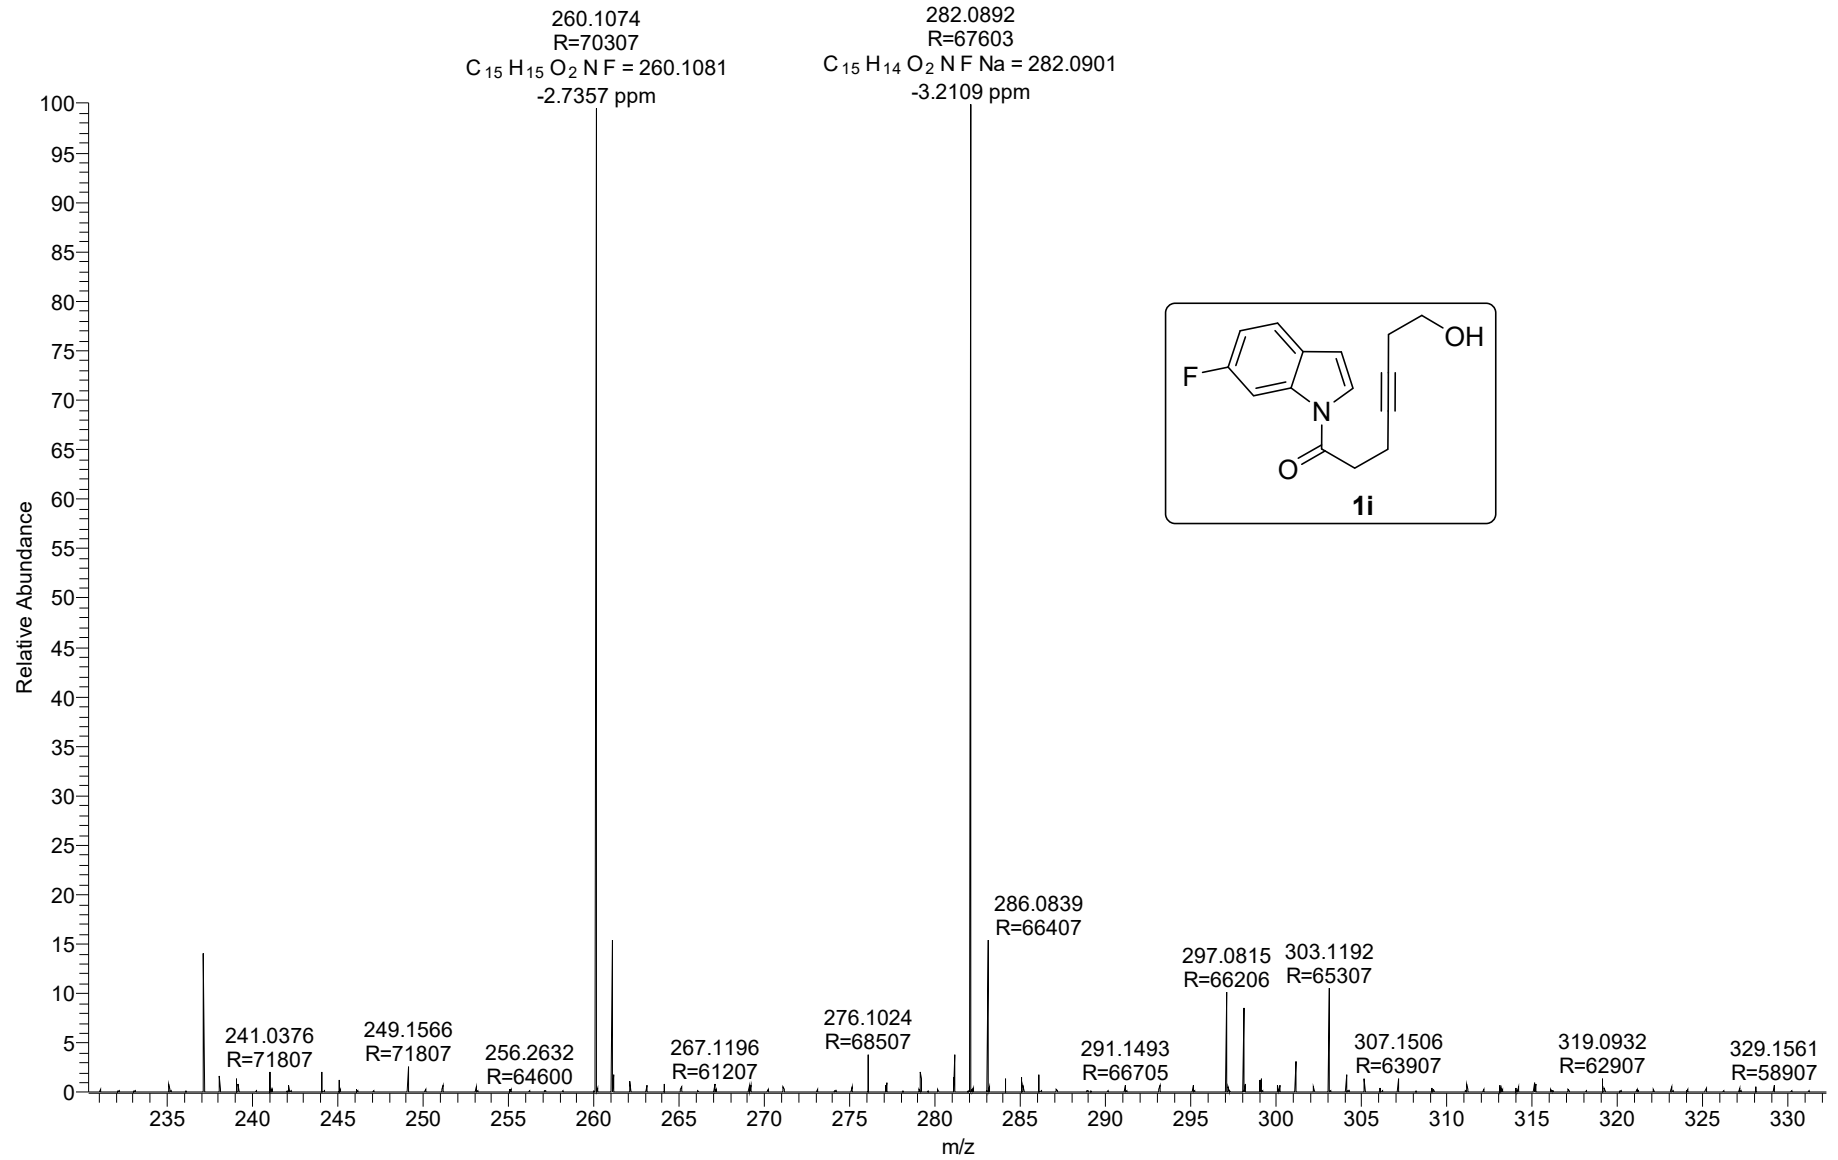

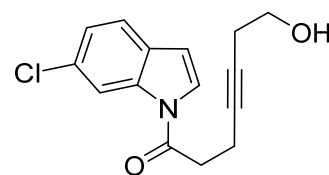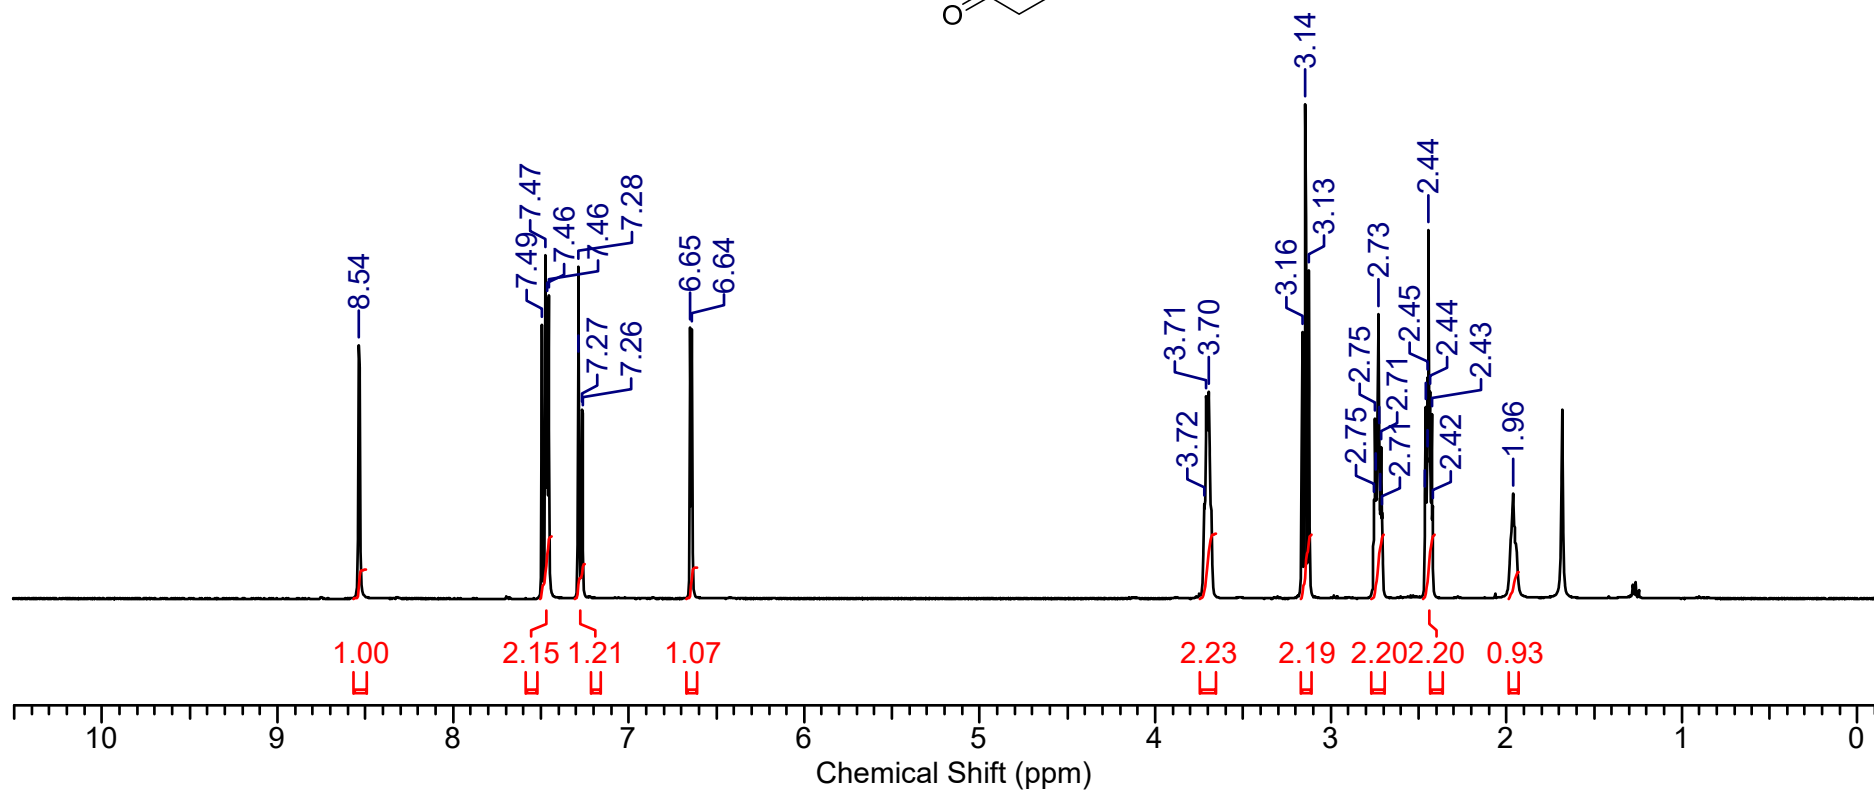



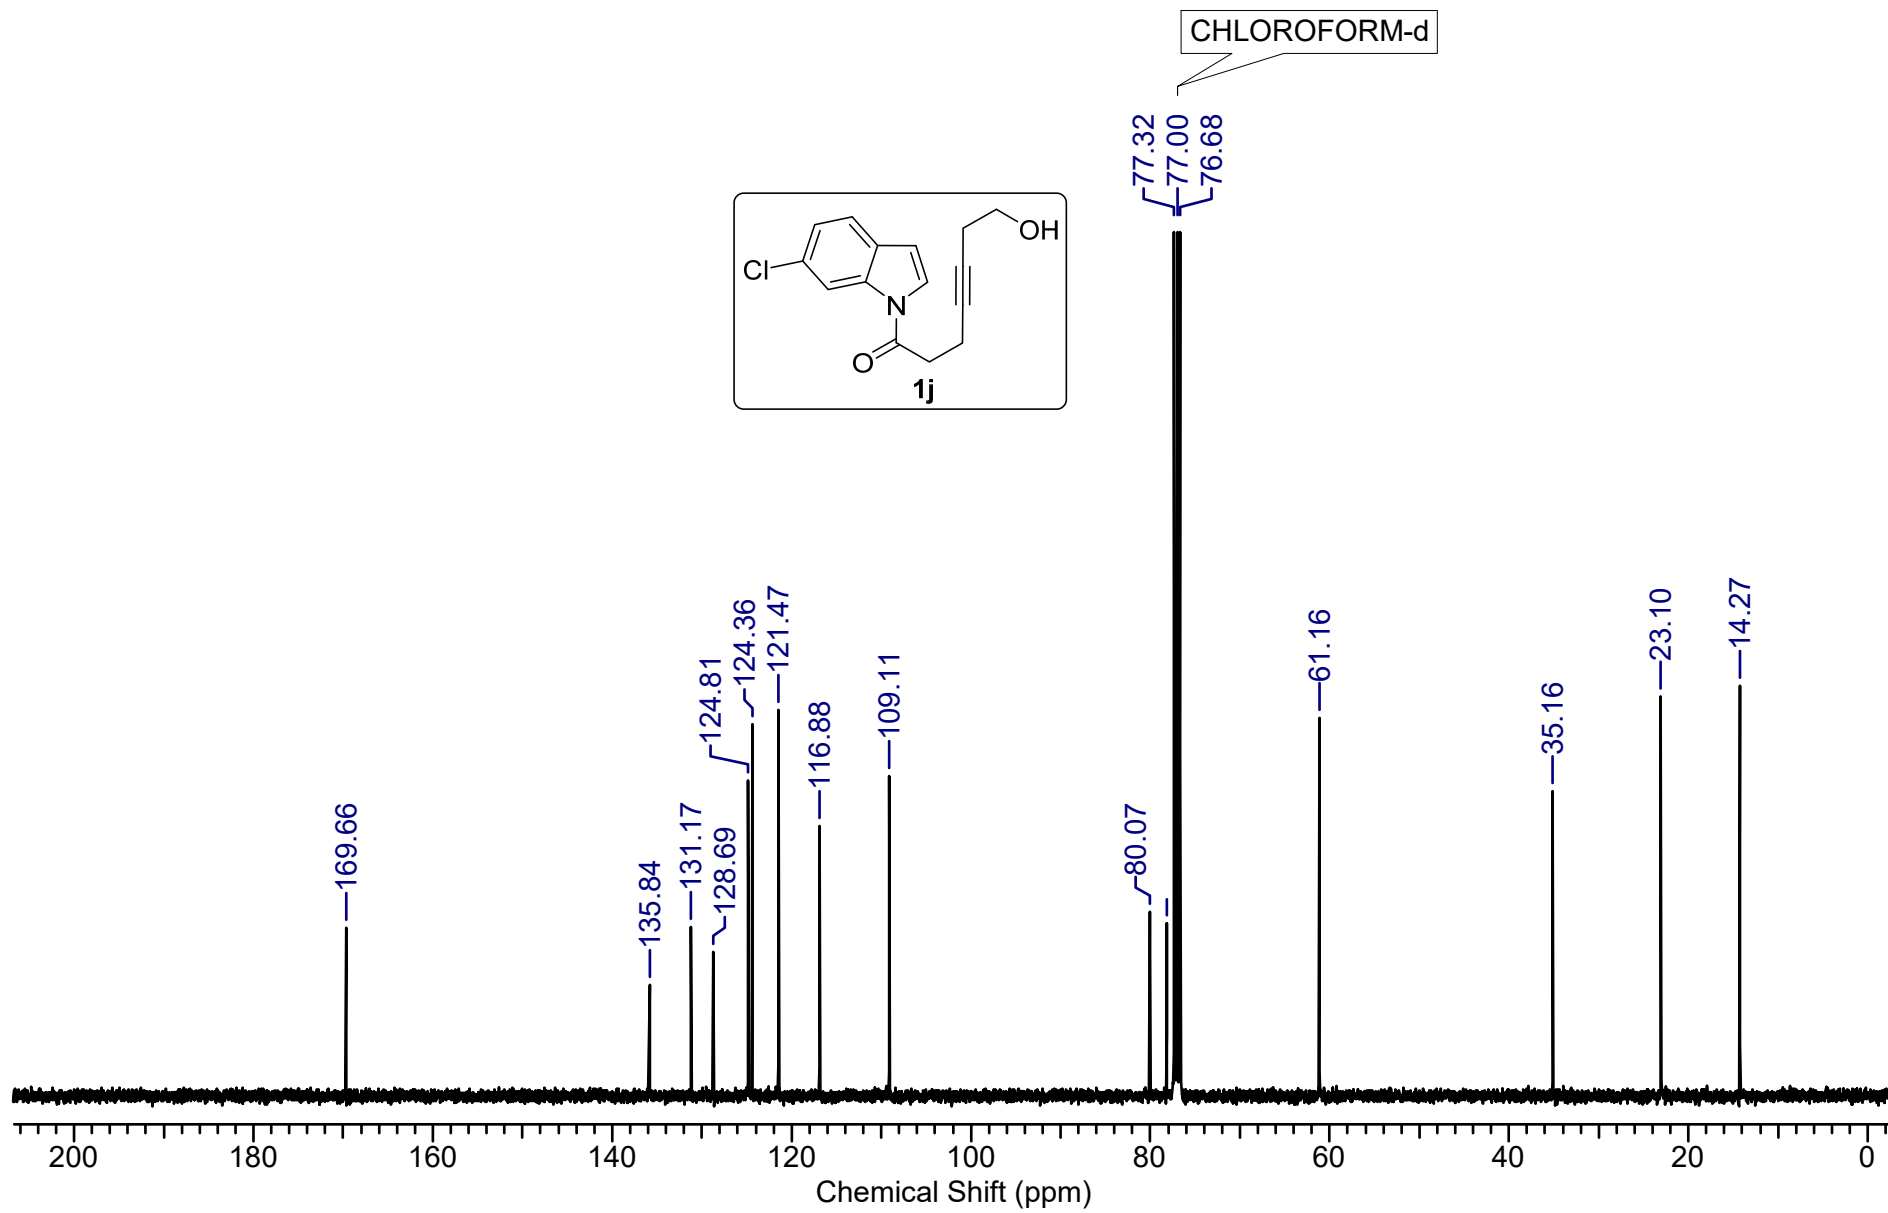

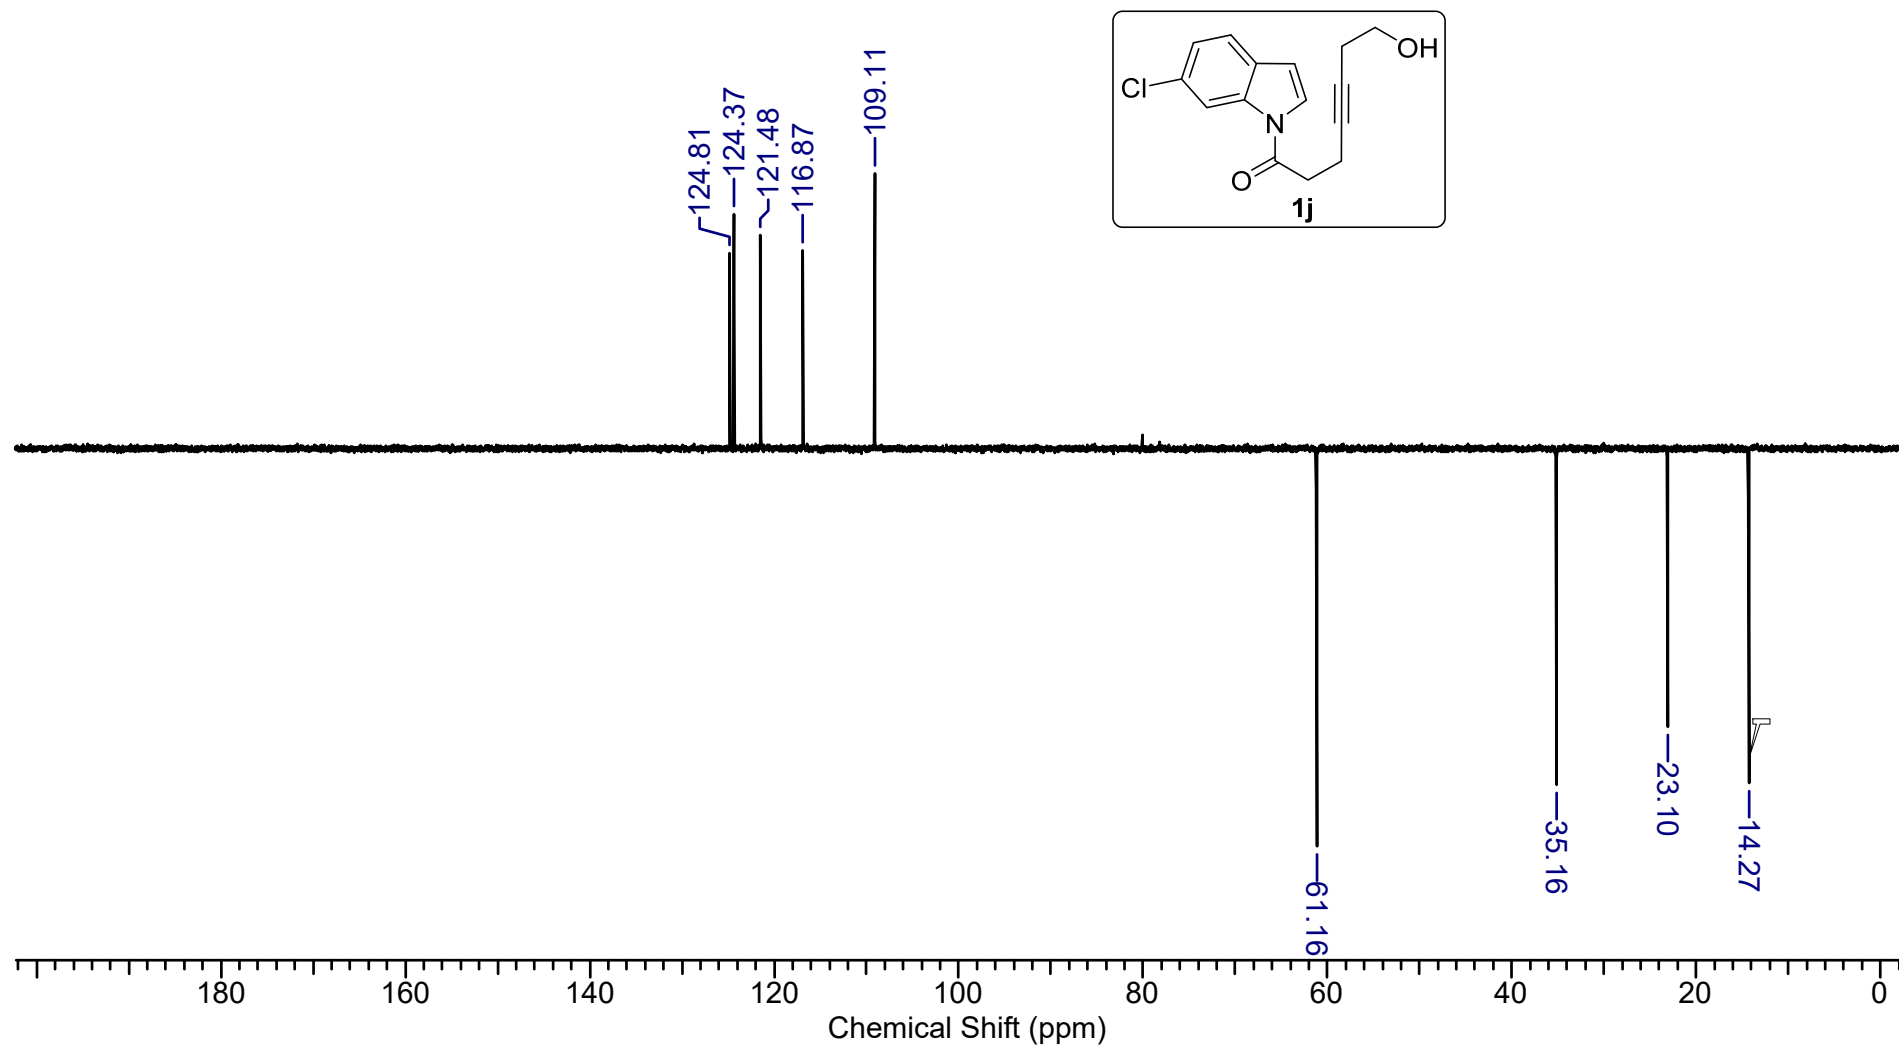

MSH-52 #248 RT: 1.35 AV: 1 NL: 1.57E8  
T: FTMS + p ESI Full ms [100.0000-1500.0000]

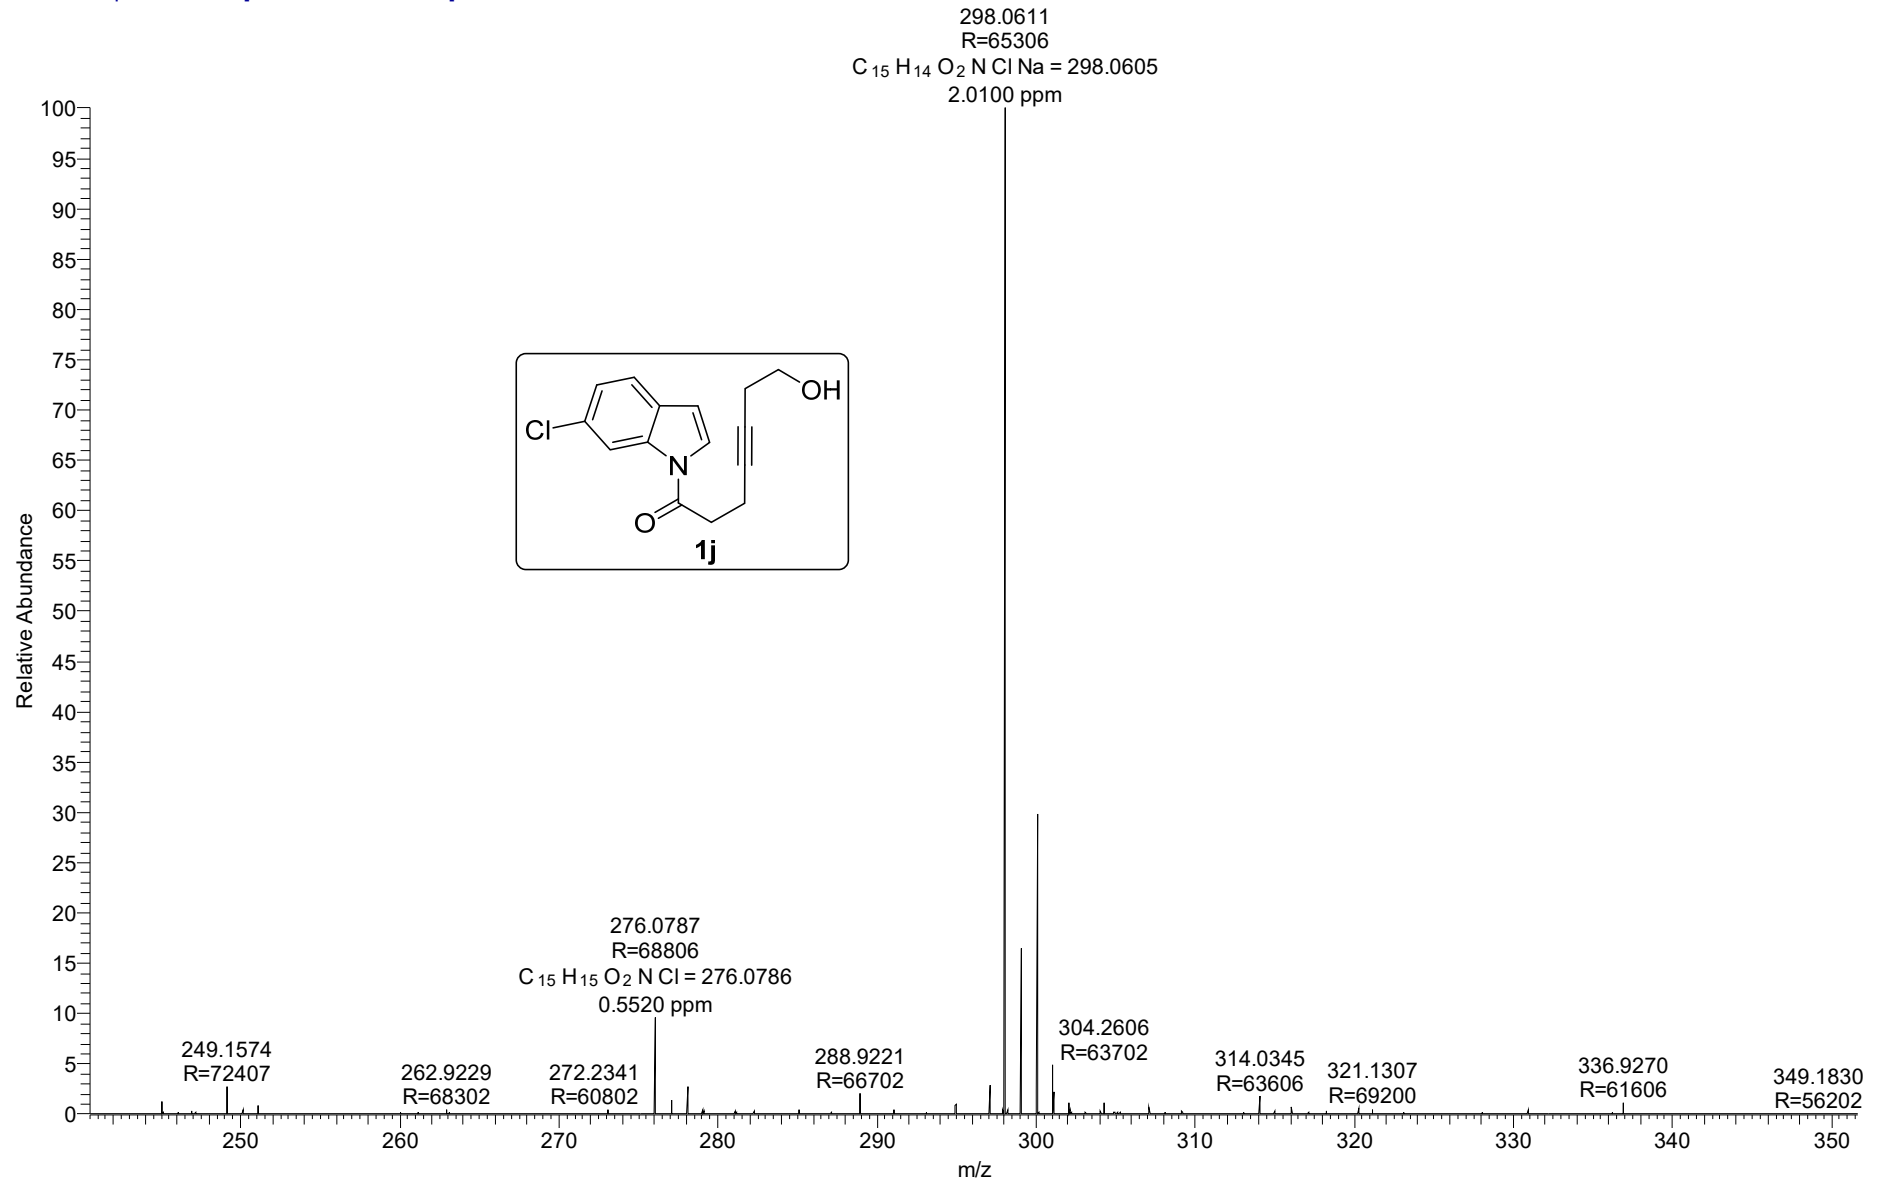

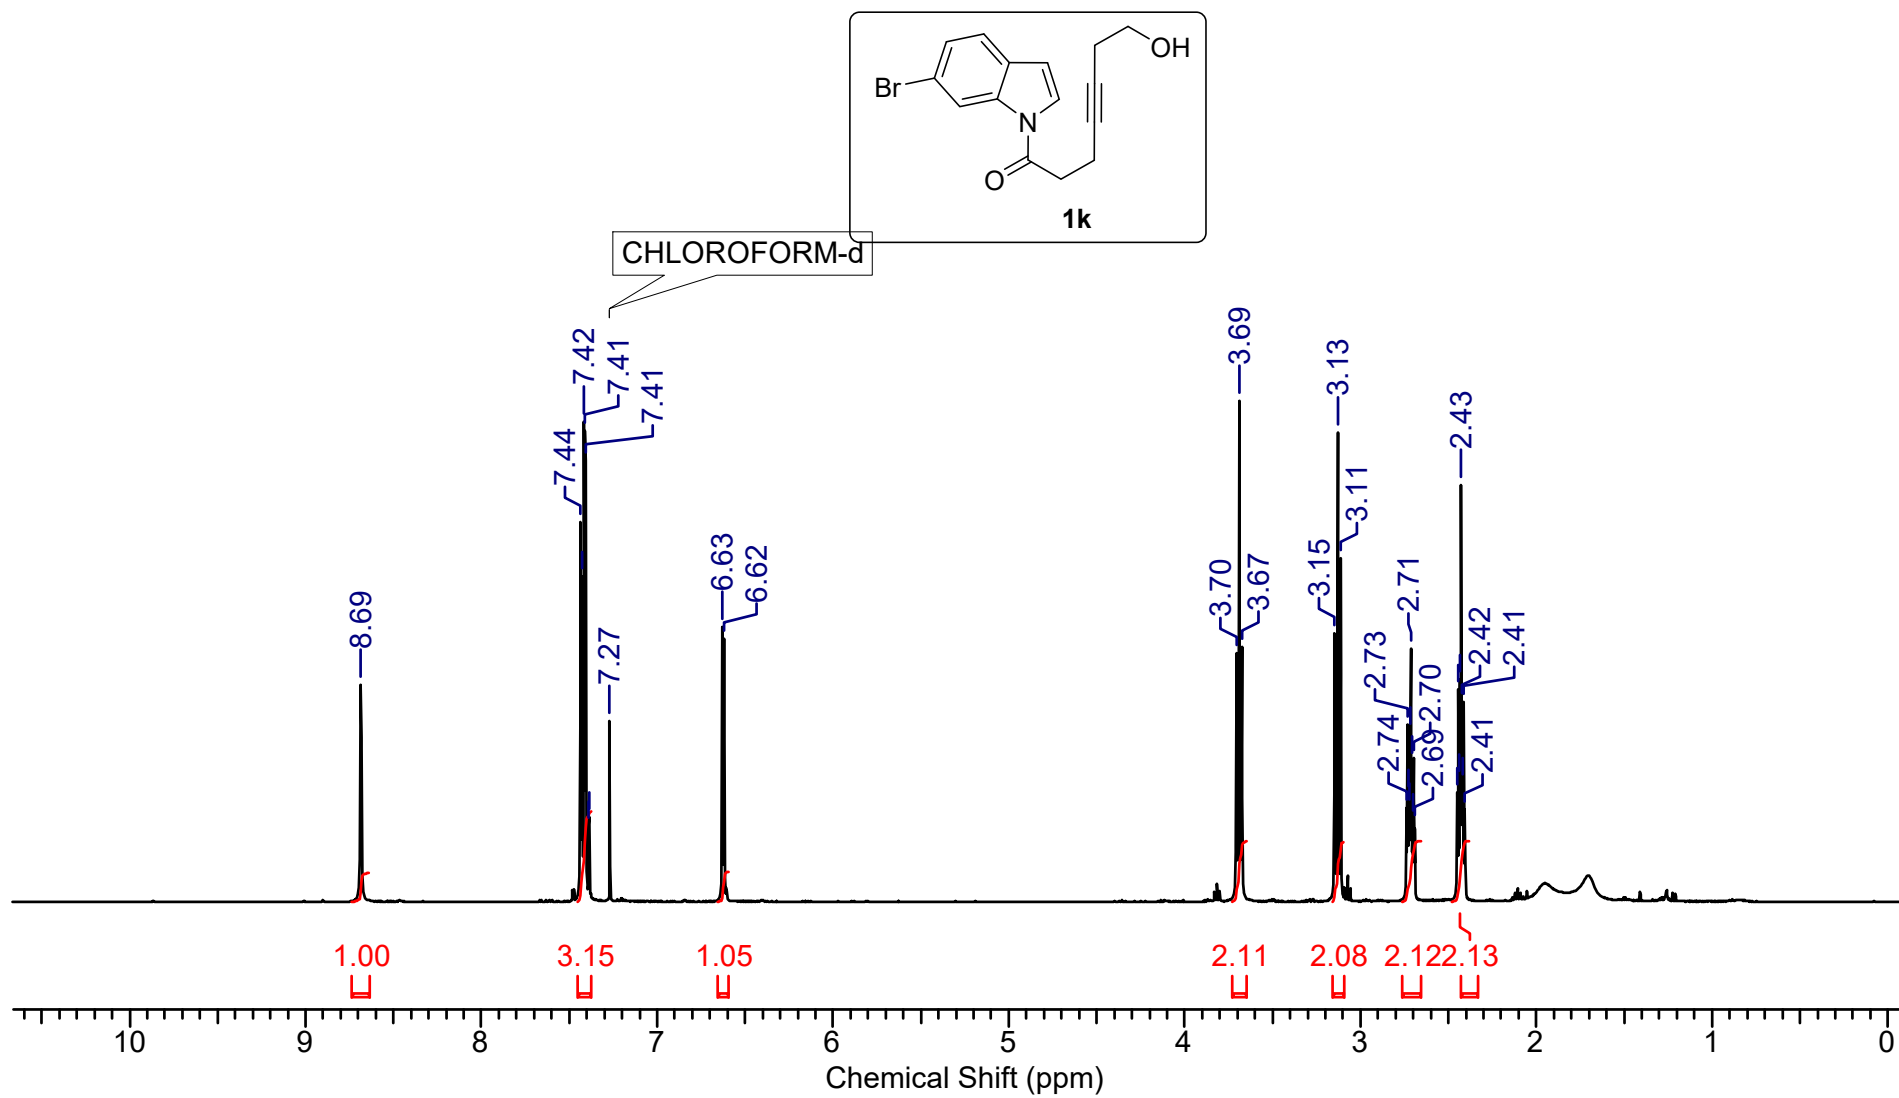

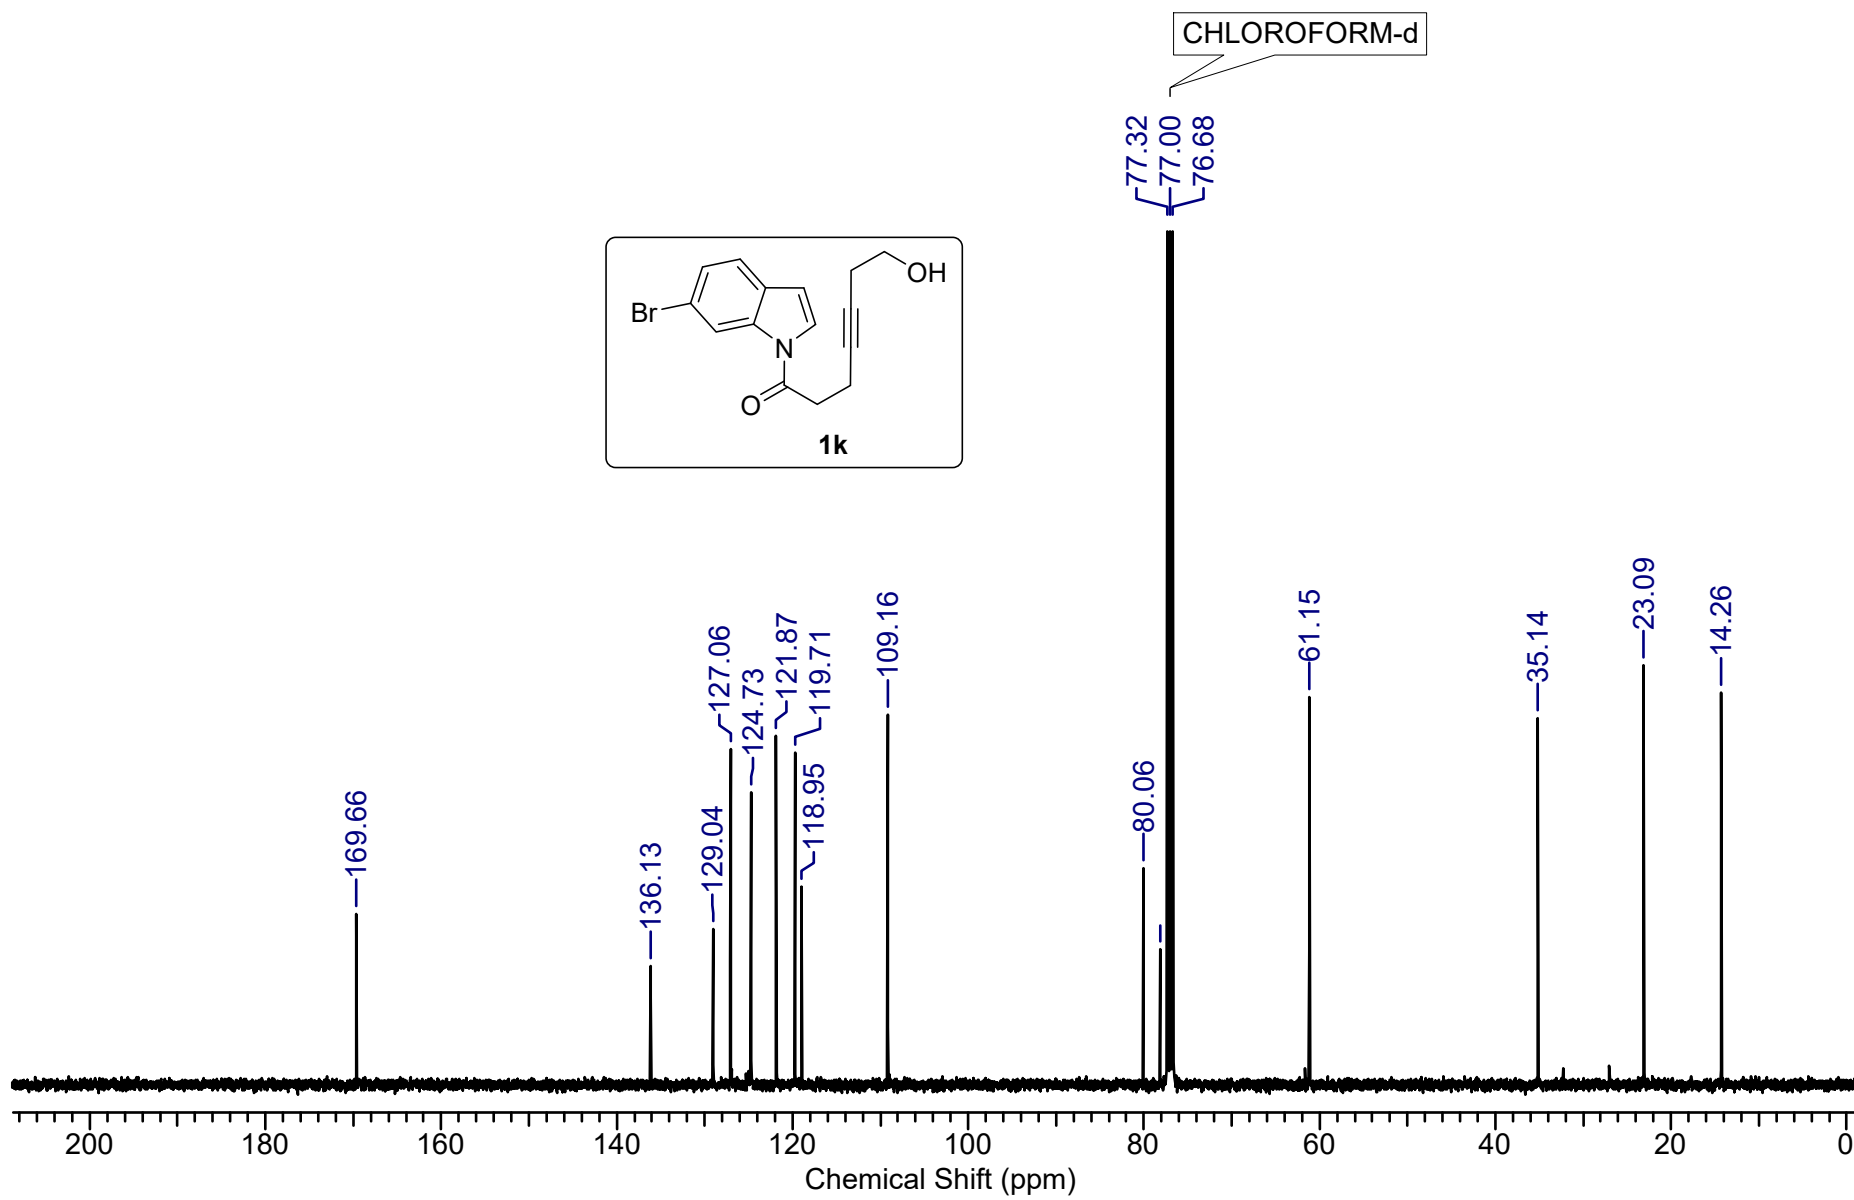

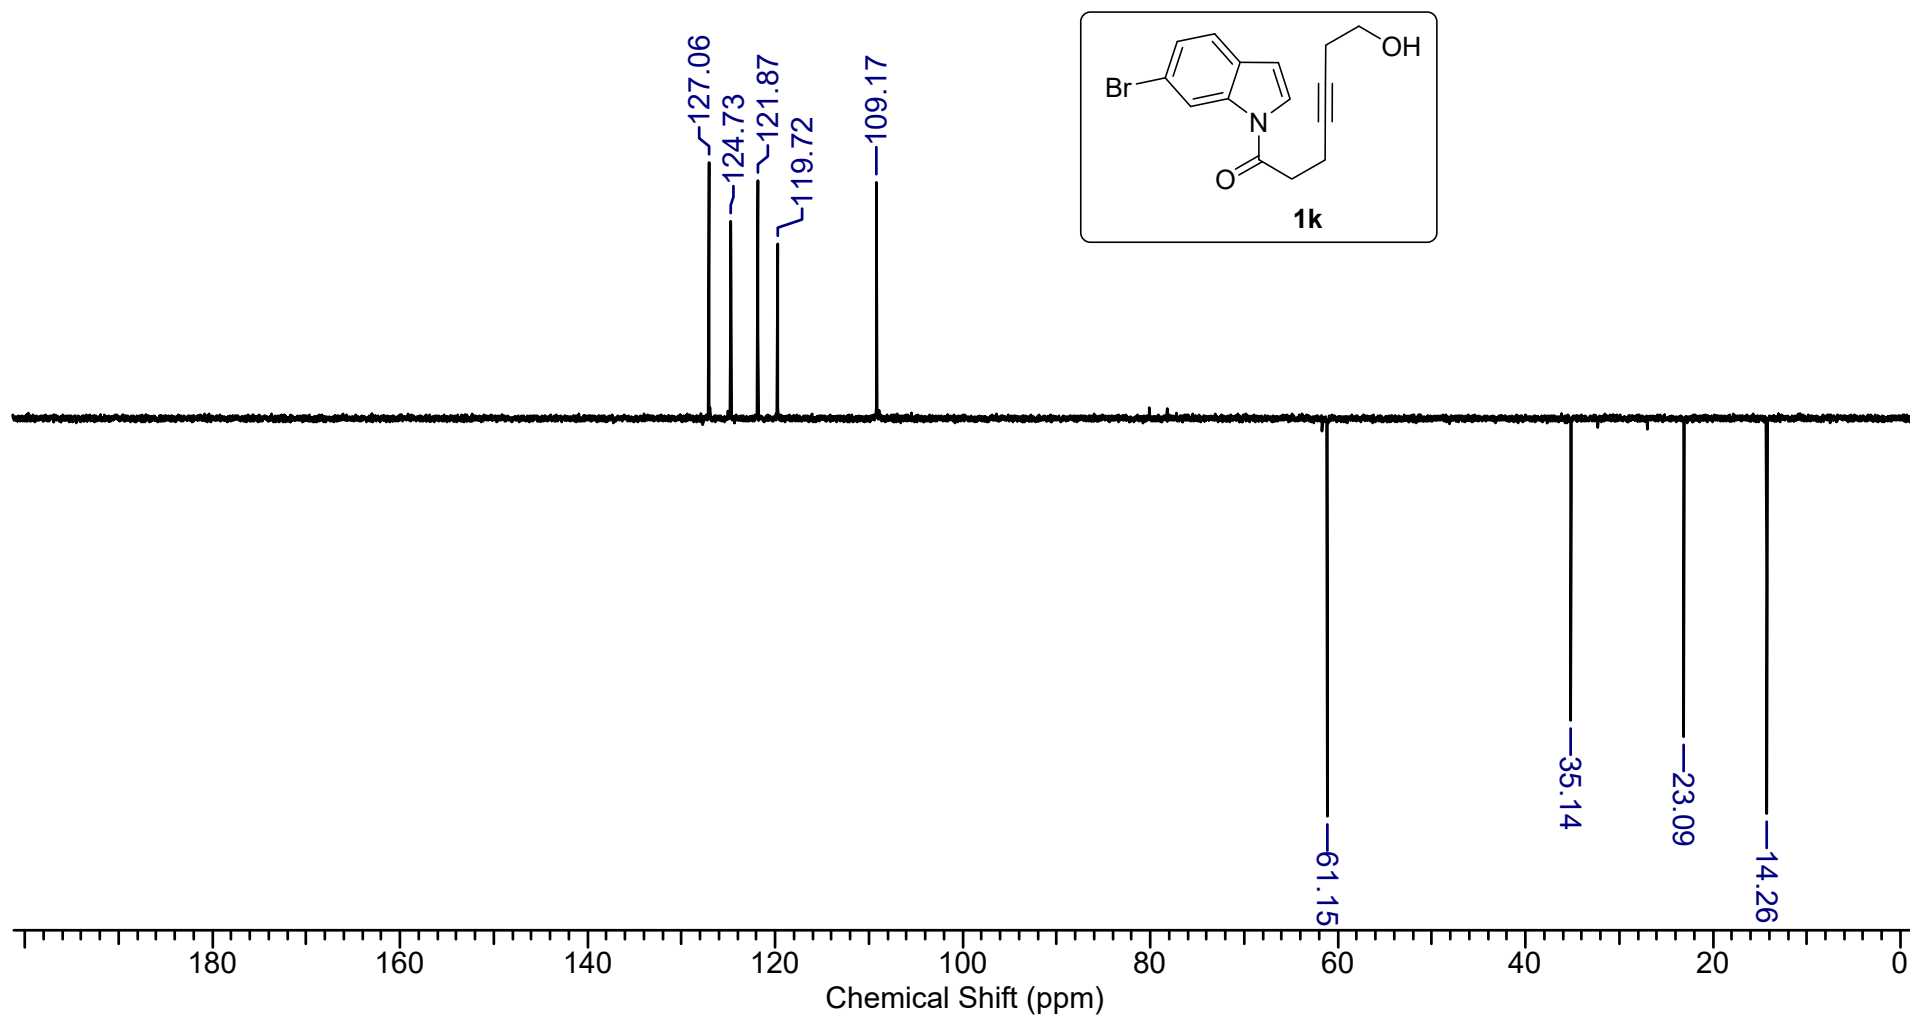

MSH-40 #290 RT: 1.58 AV: 1 NL: 4.28E8  
T: FTMS + p ESI Full ms [100.0000-1500.0000]

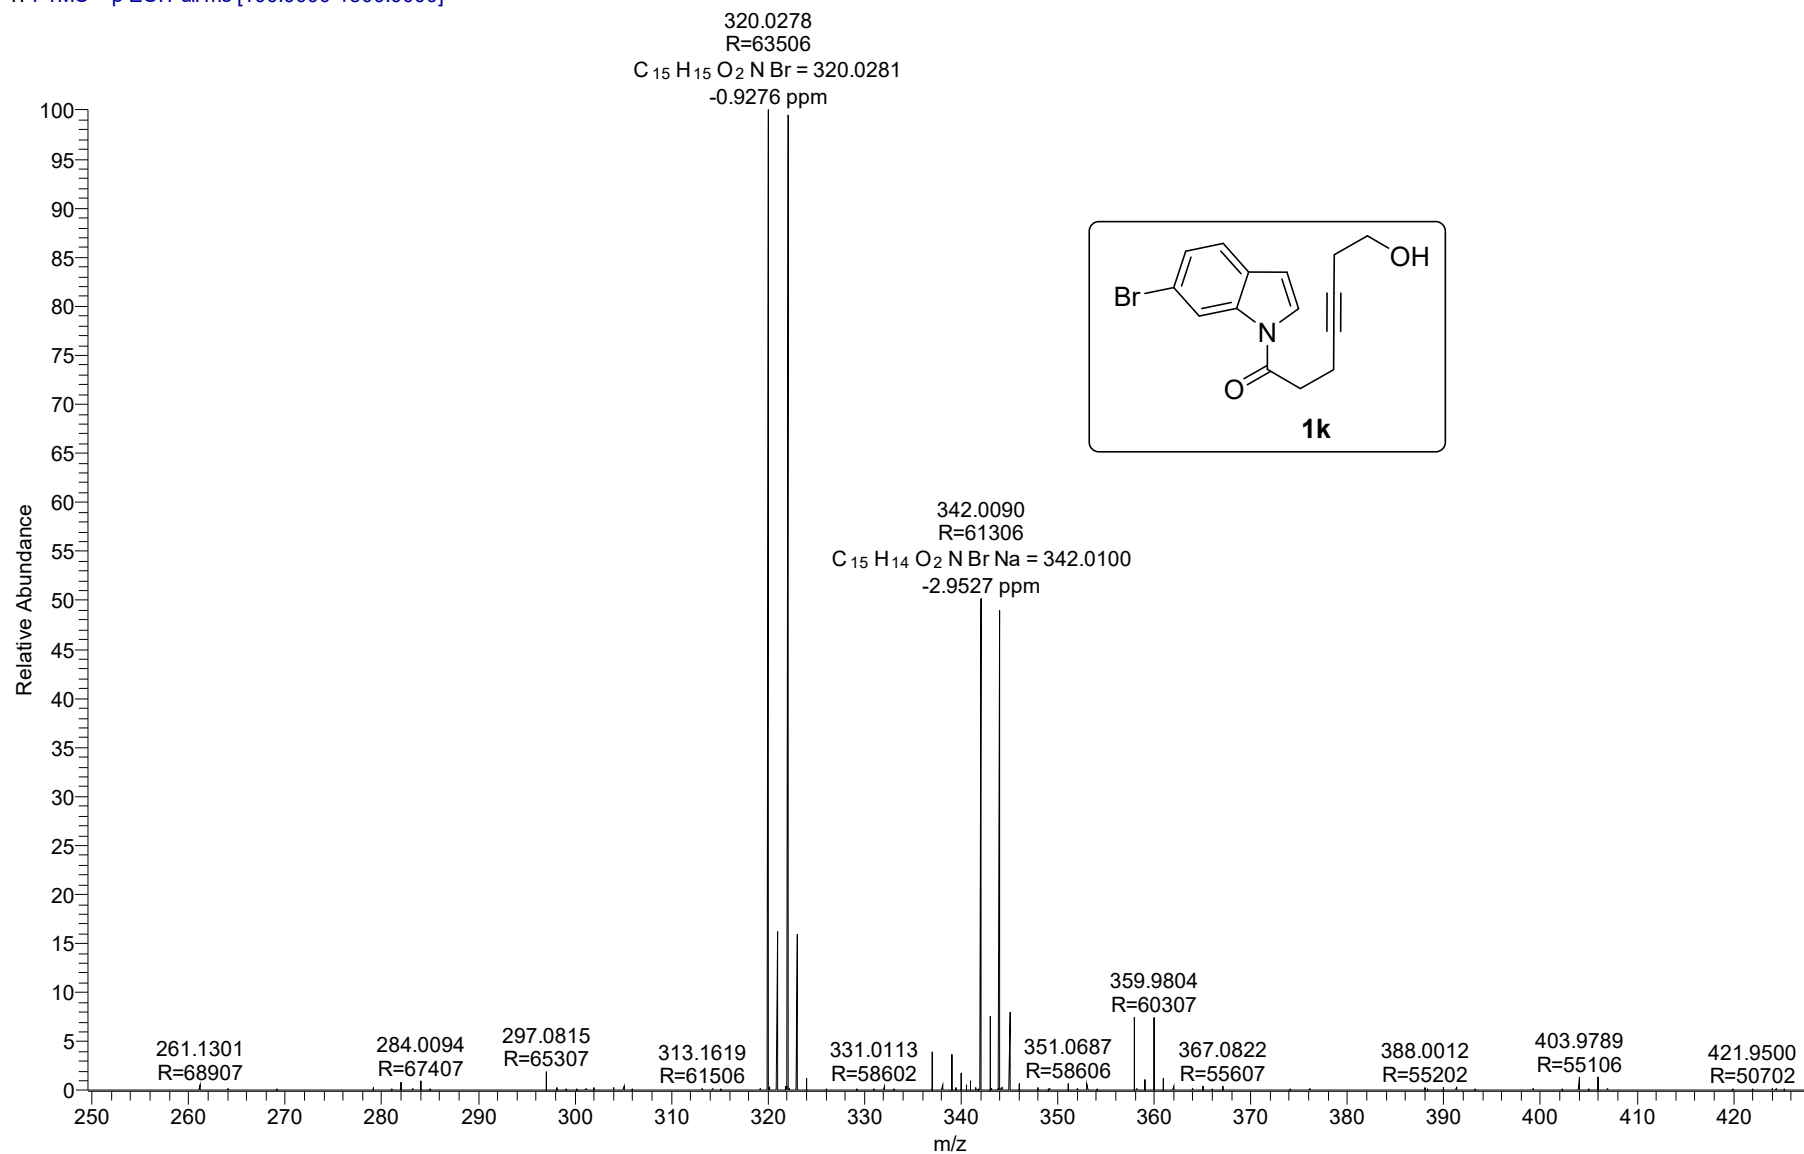

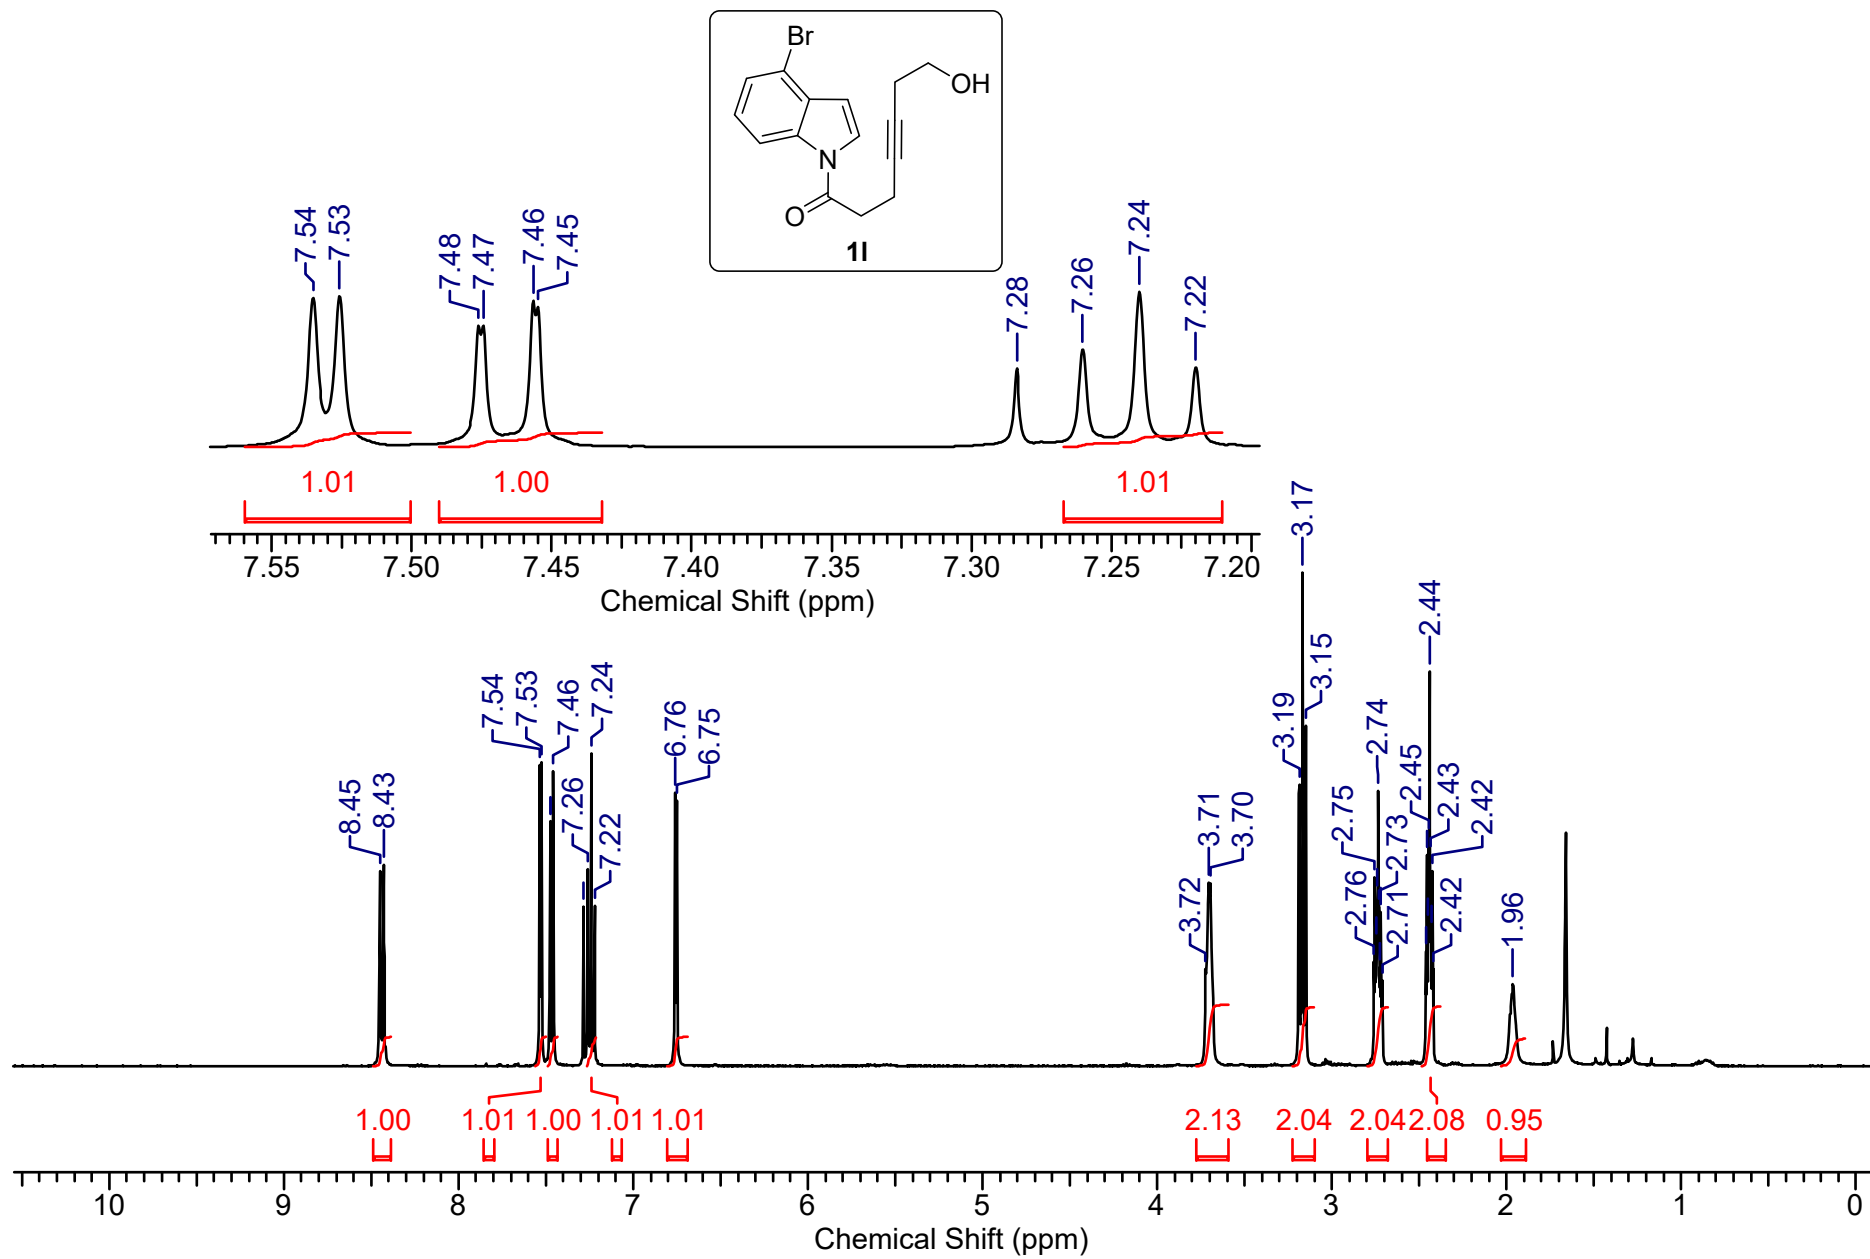



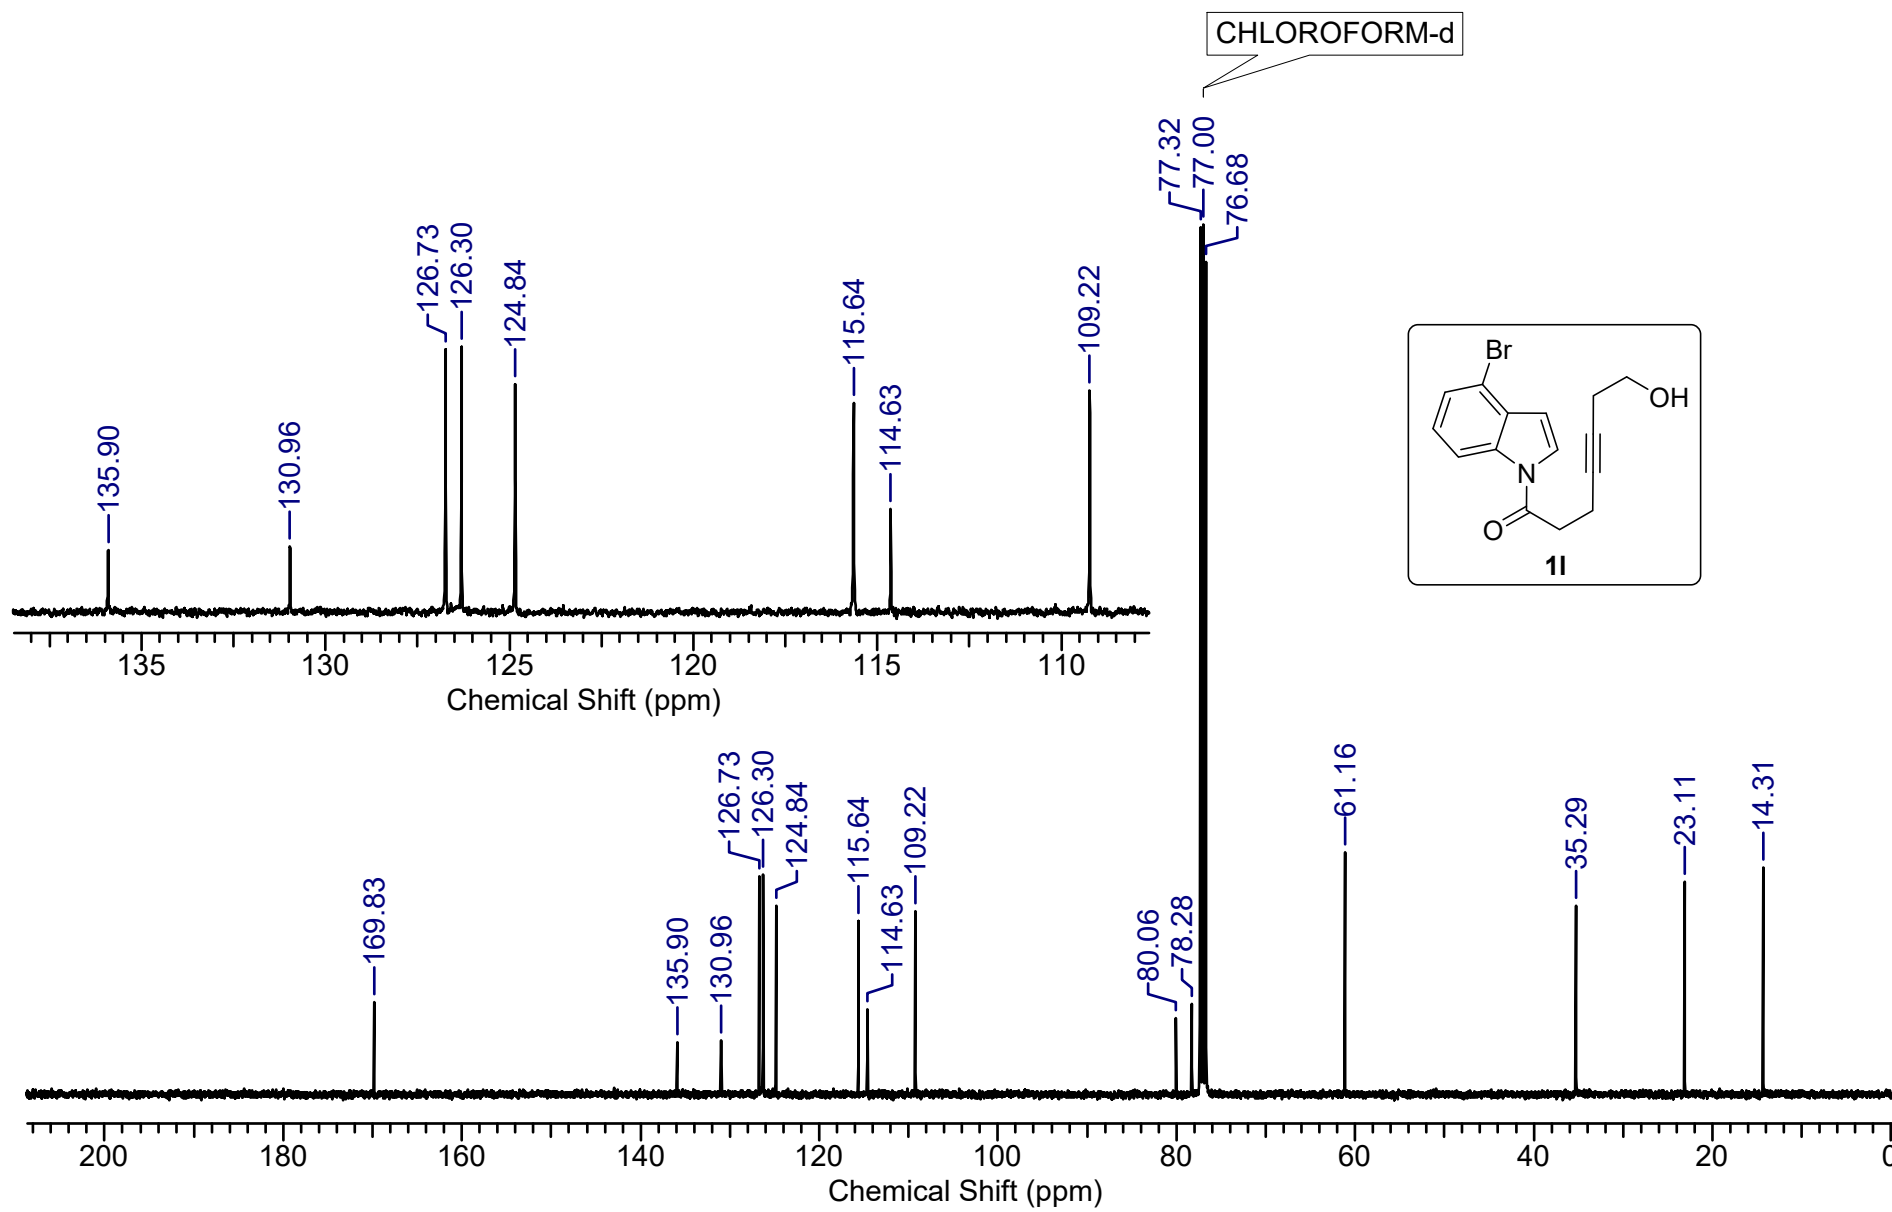

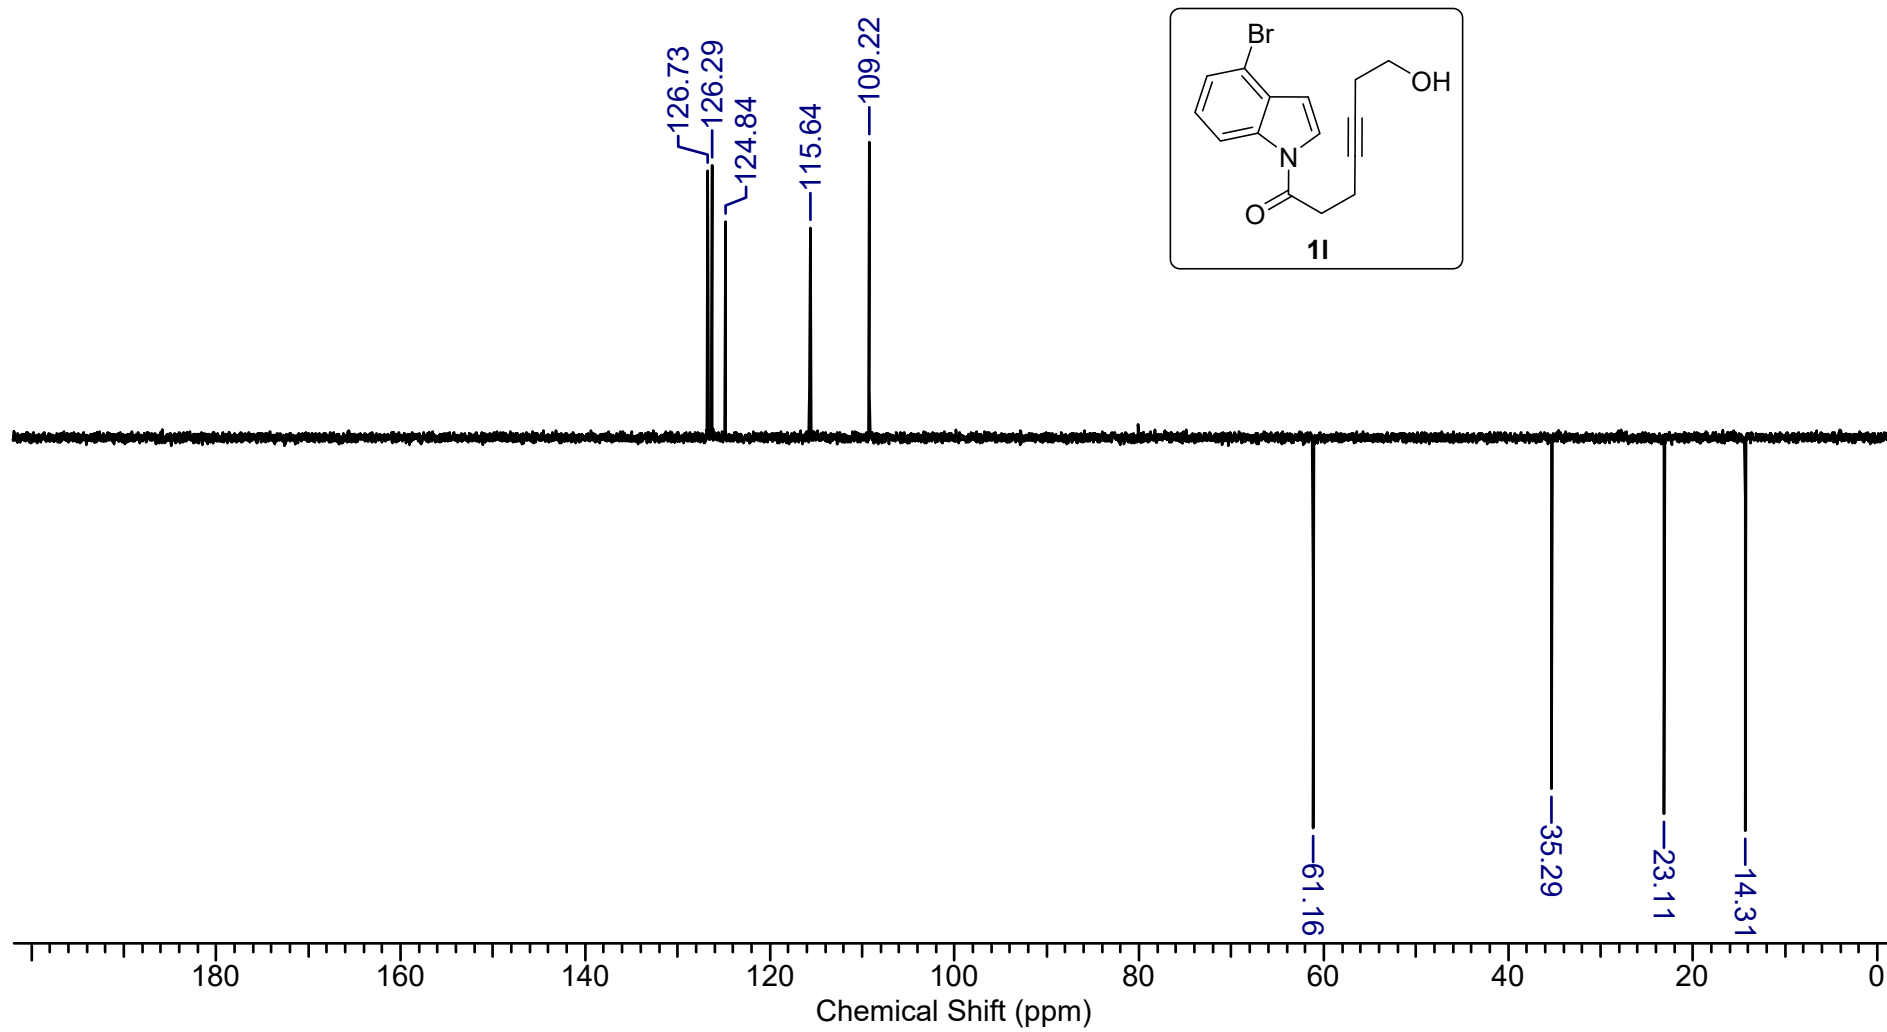

MS-11 #297 RT: 1.59 AV: 1 NL: 6.04E7  
T: FTMS + p ESI Full ms [100.0000-1500.0000]

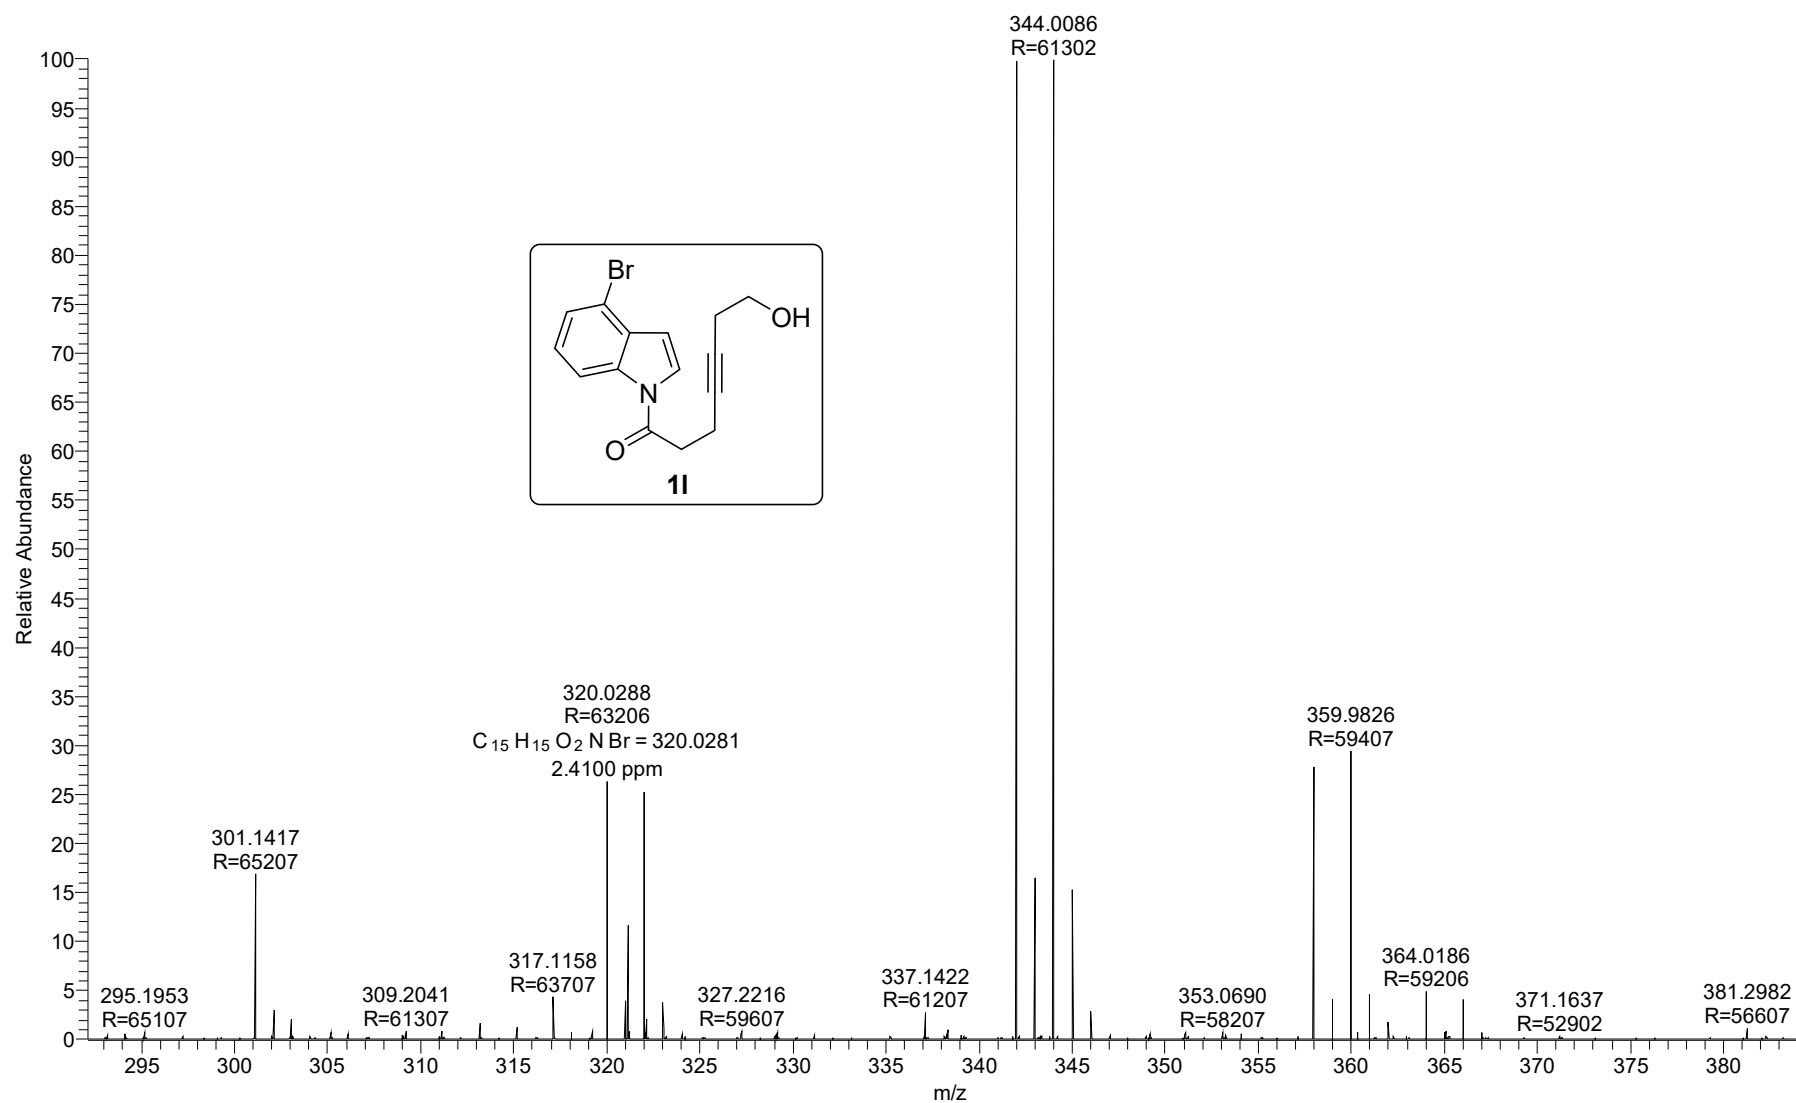

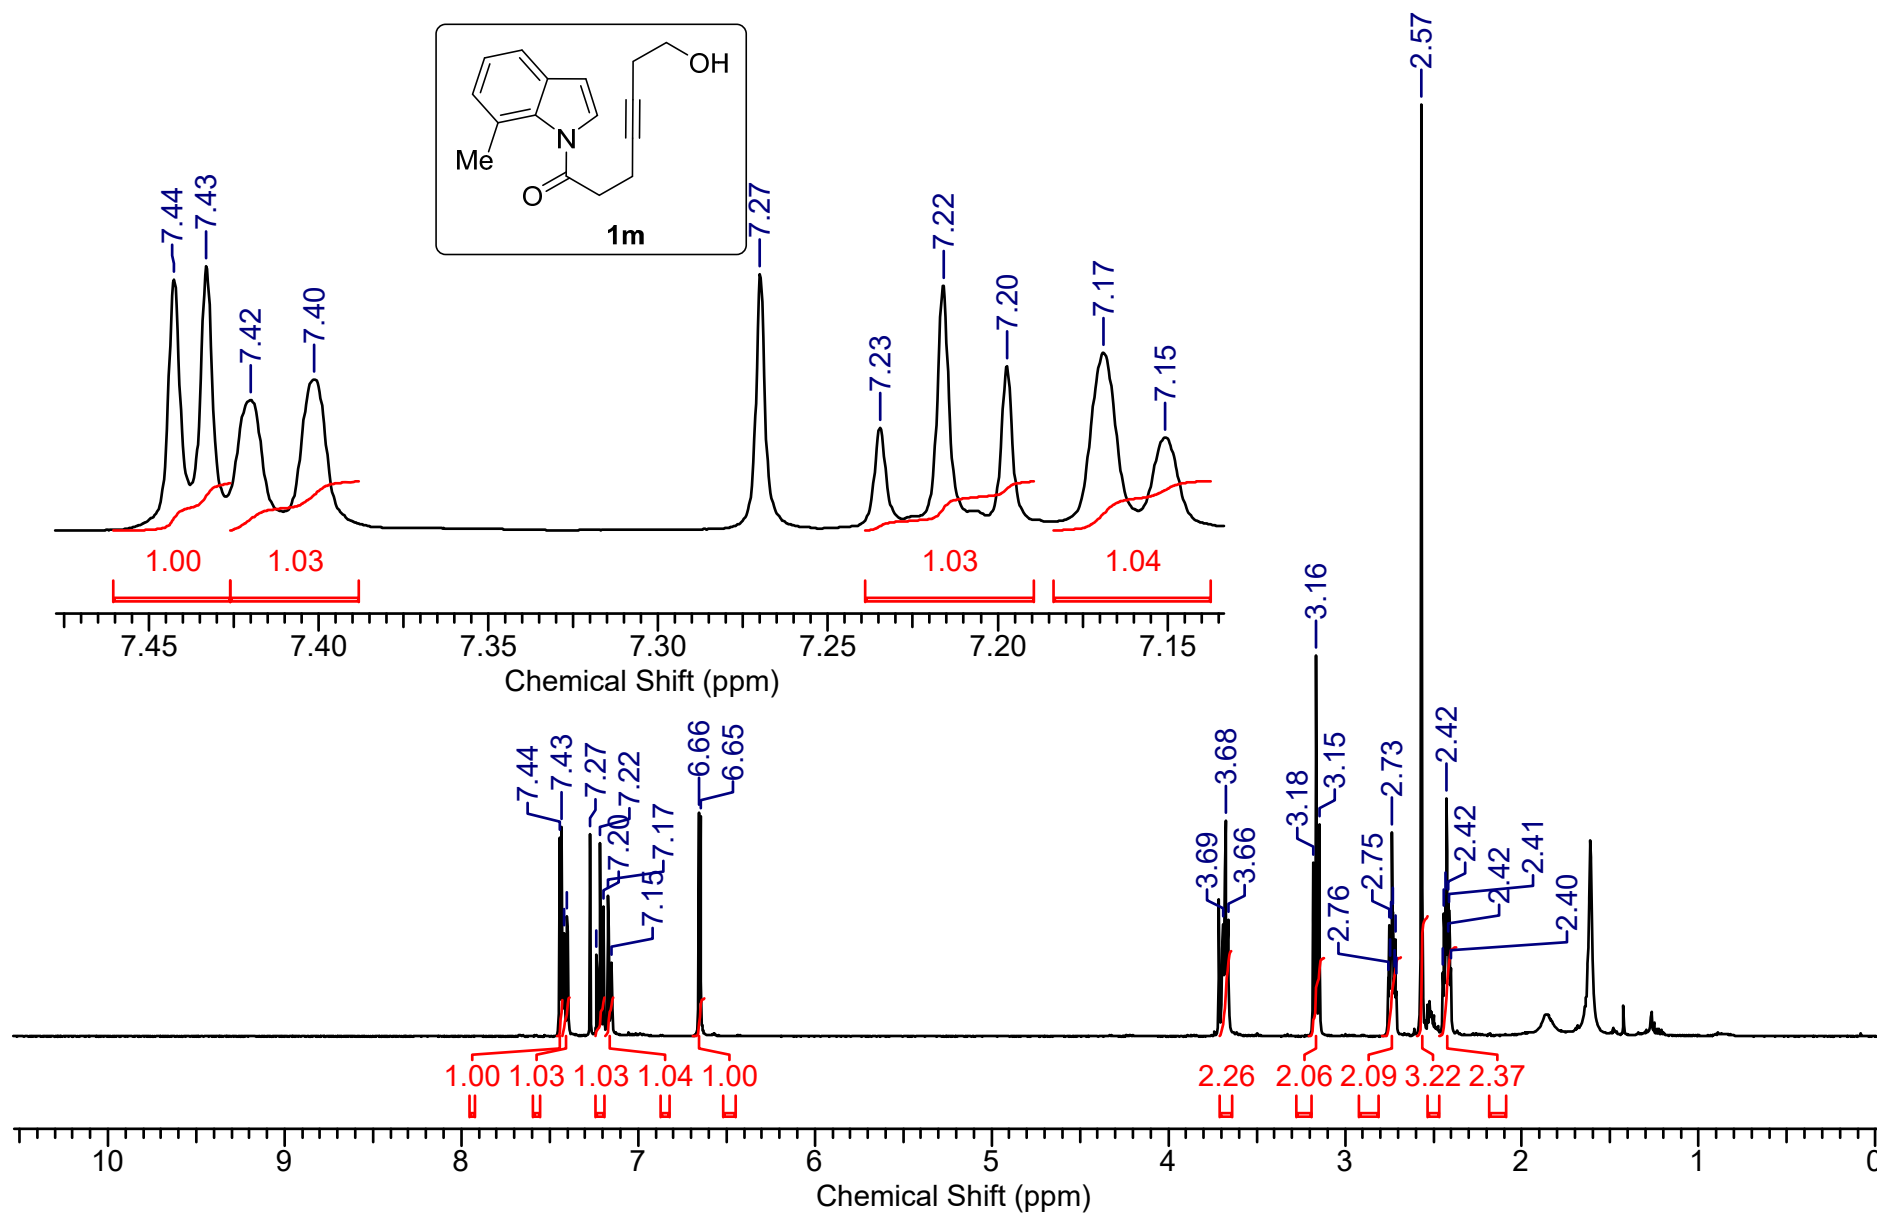

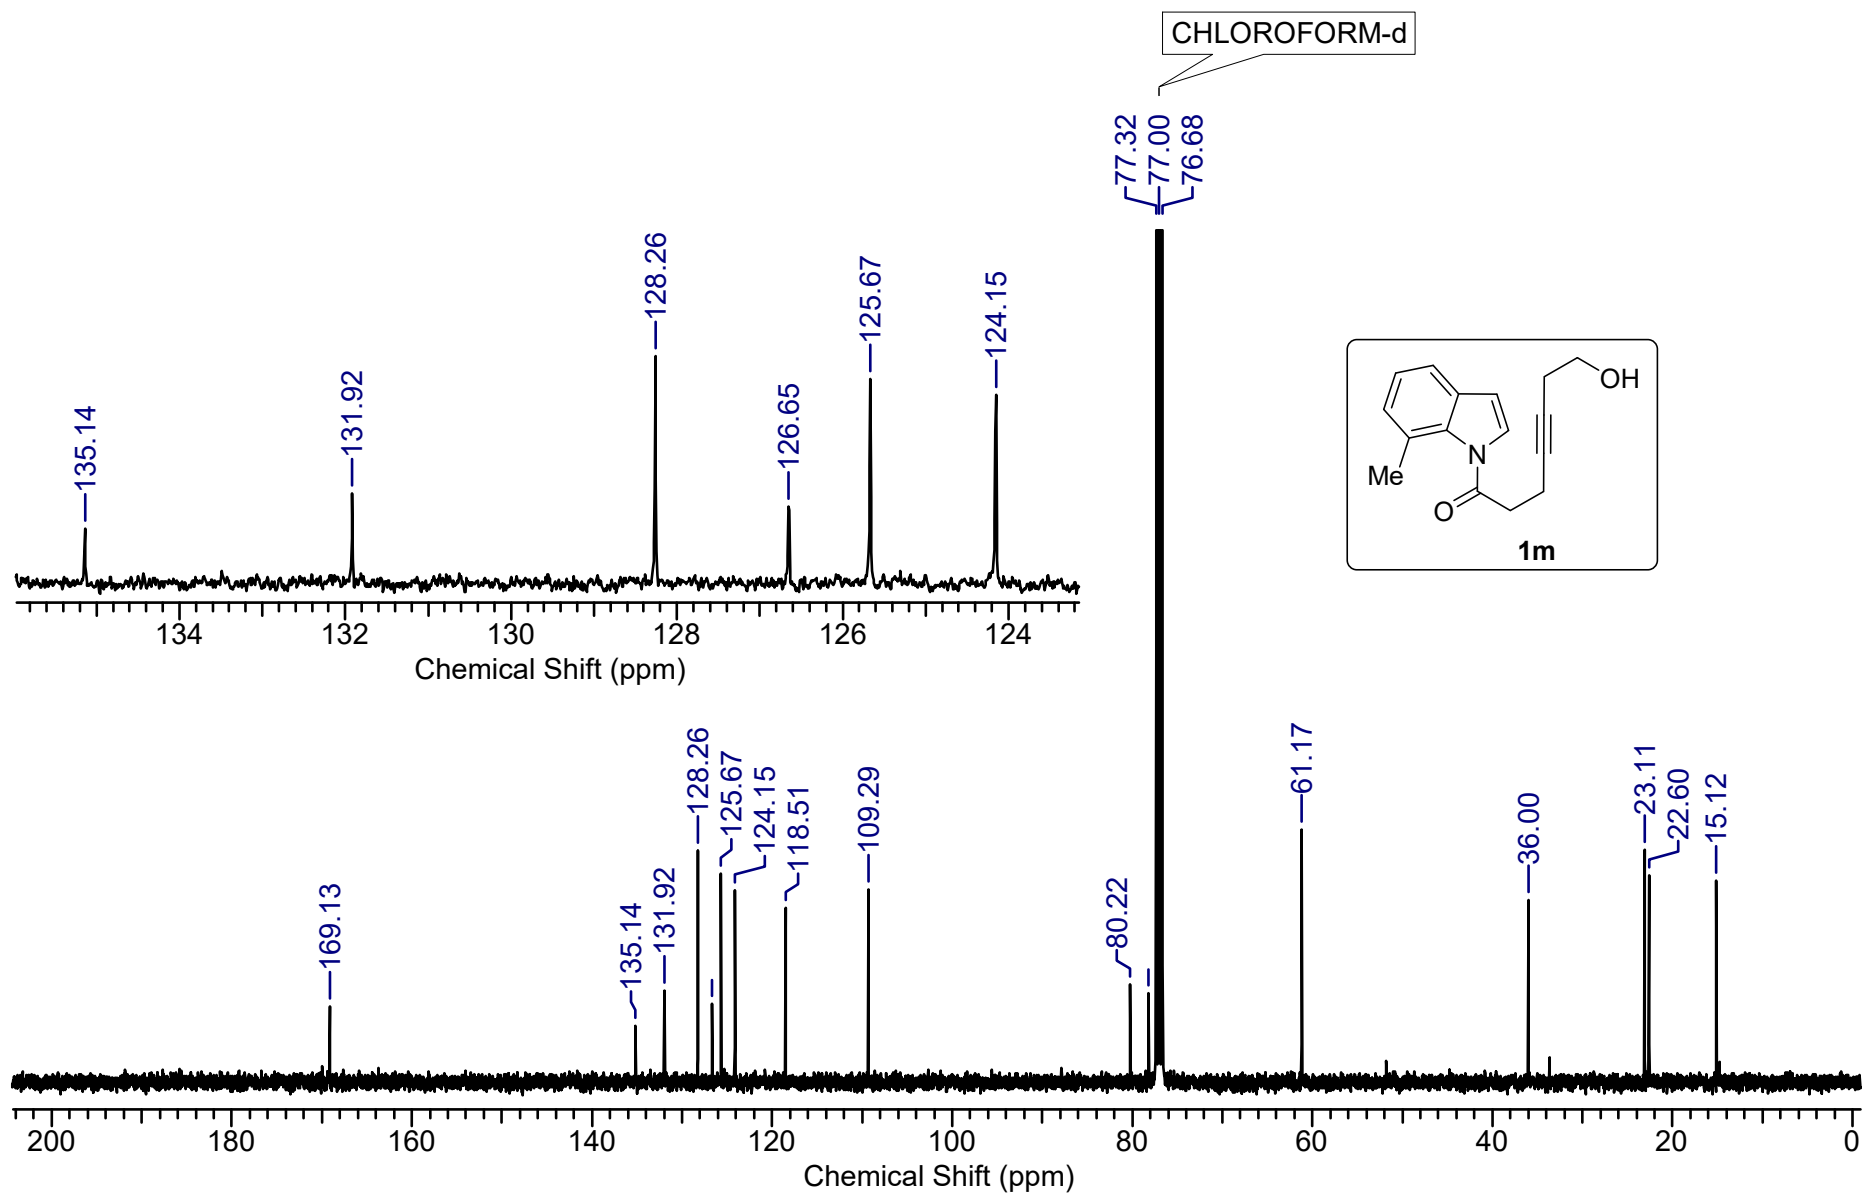

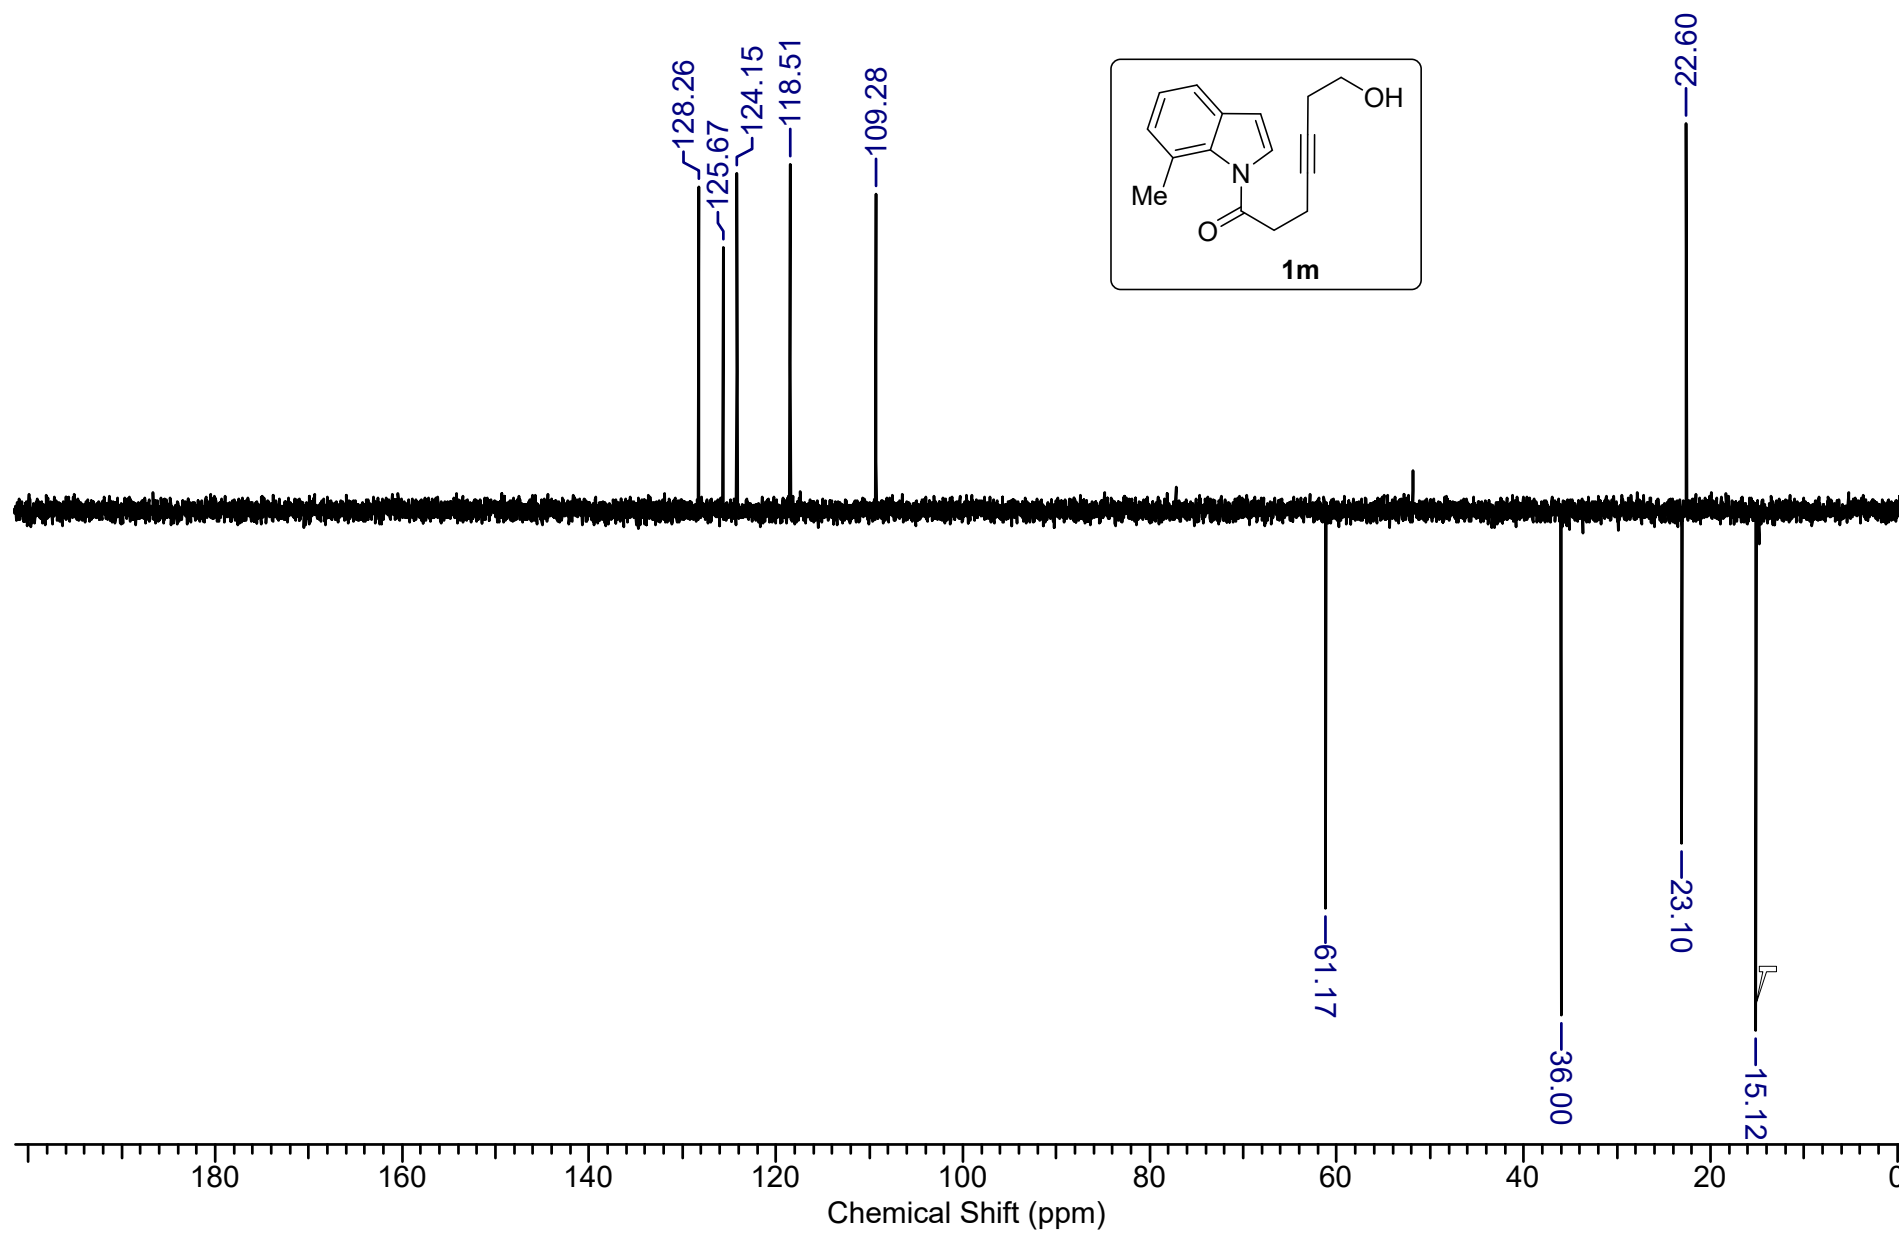

MSH-36 #288 RT: 1.57 AV: 1 NL: 9.59E8  
T: FTMS + p ESI Full ms [100.0000-1500.0000]

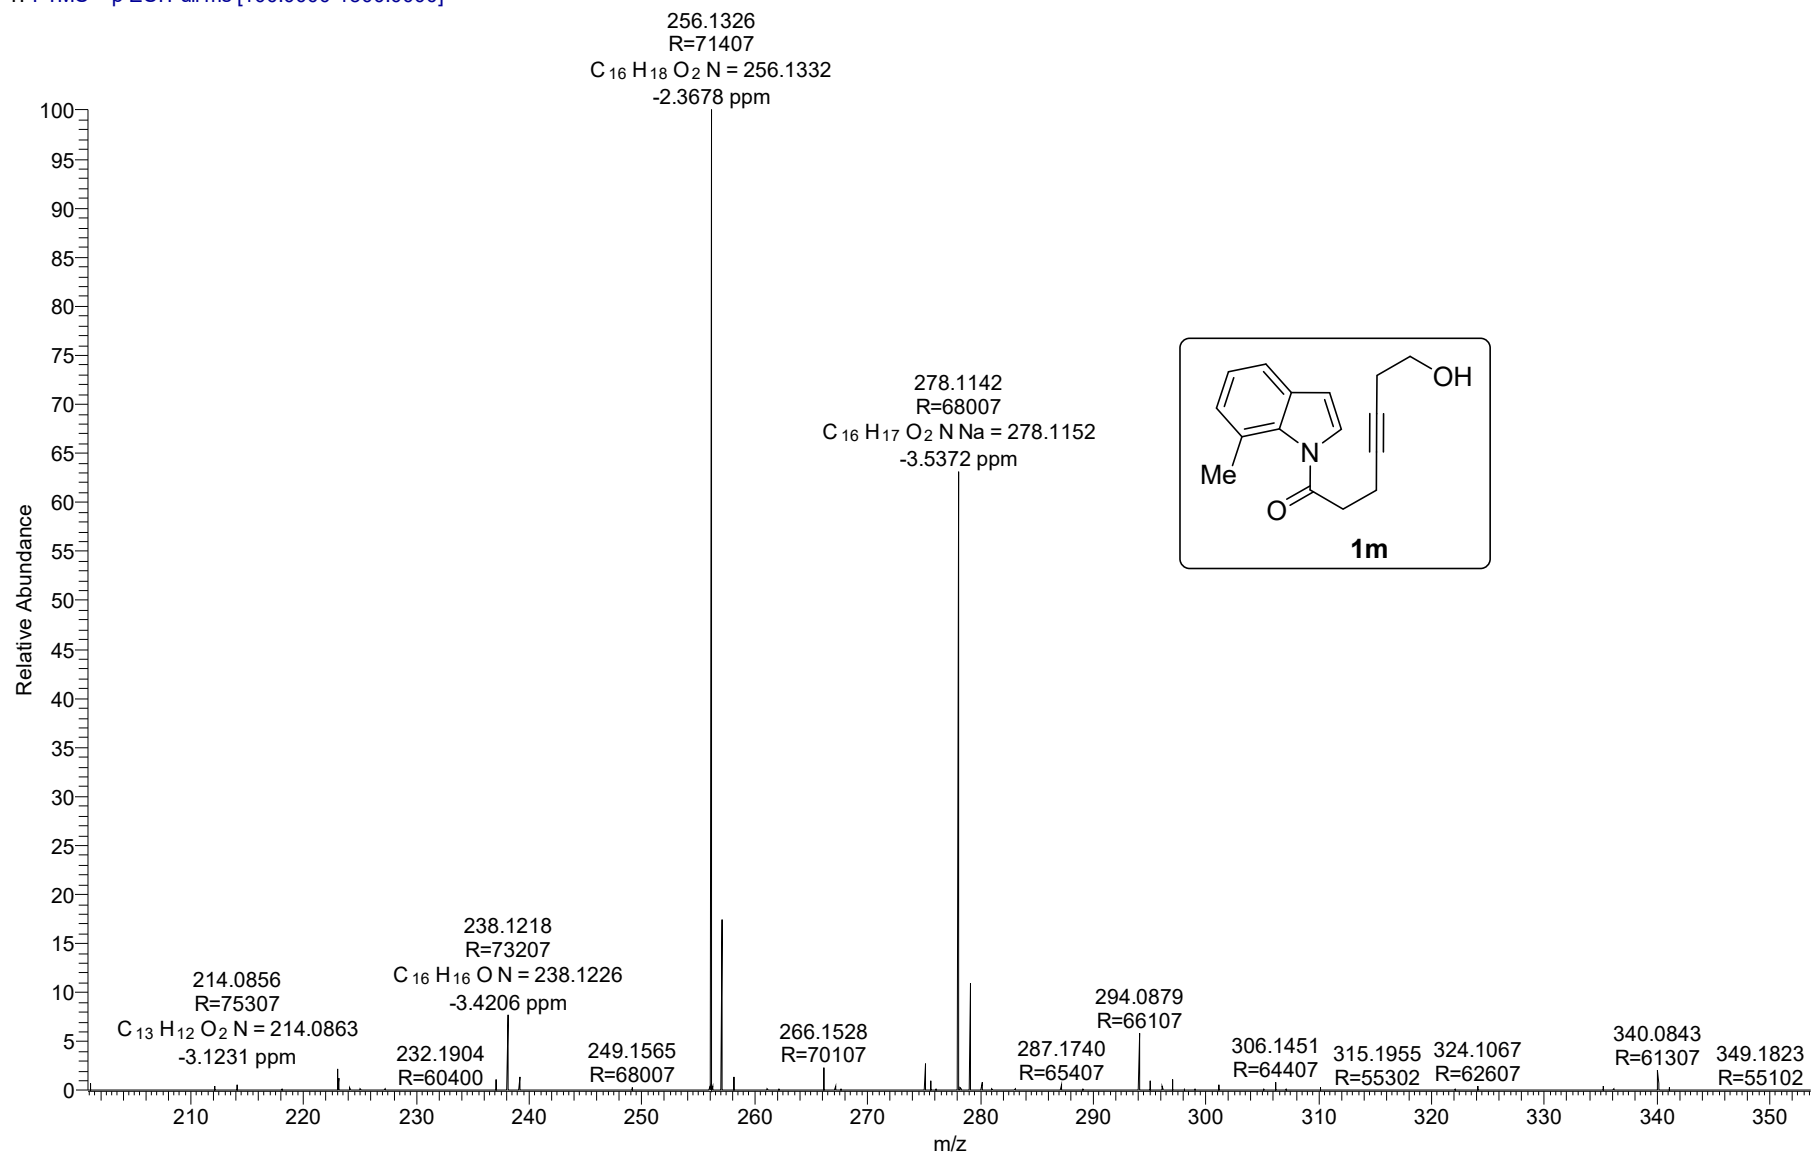

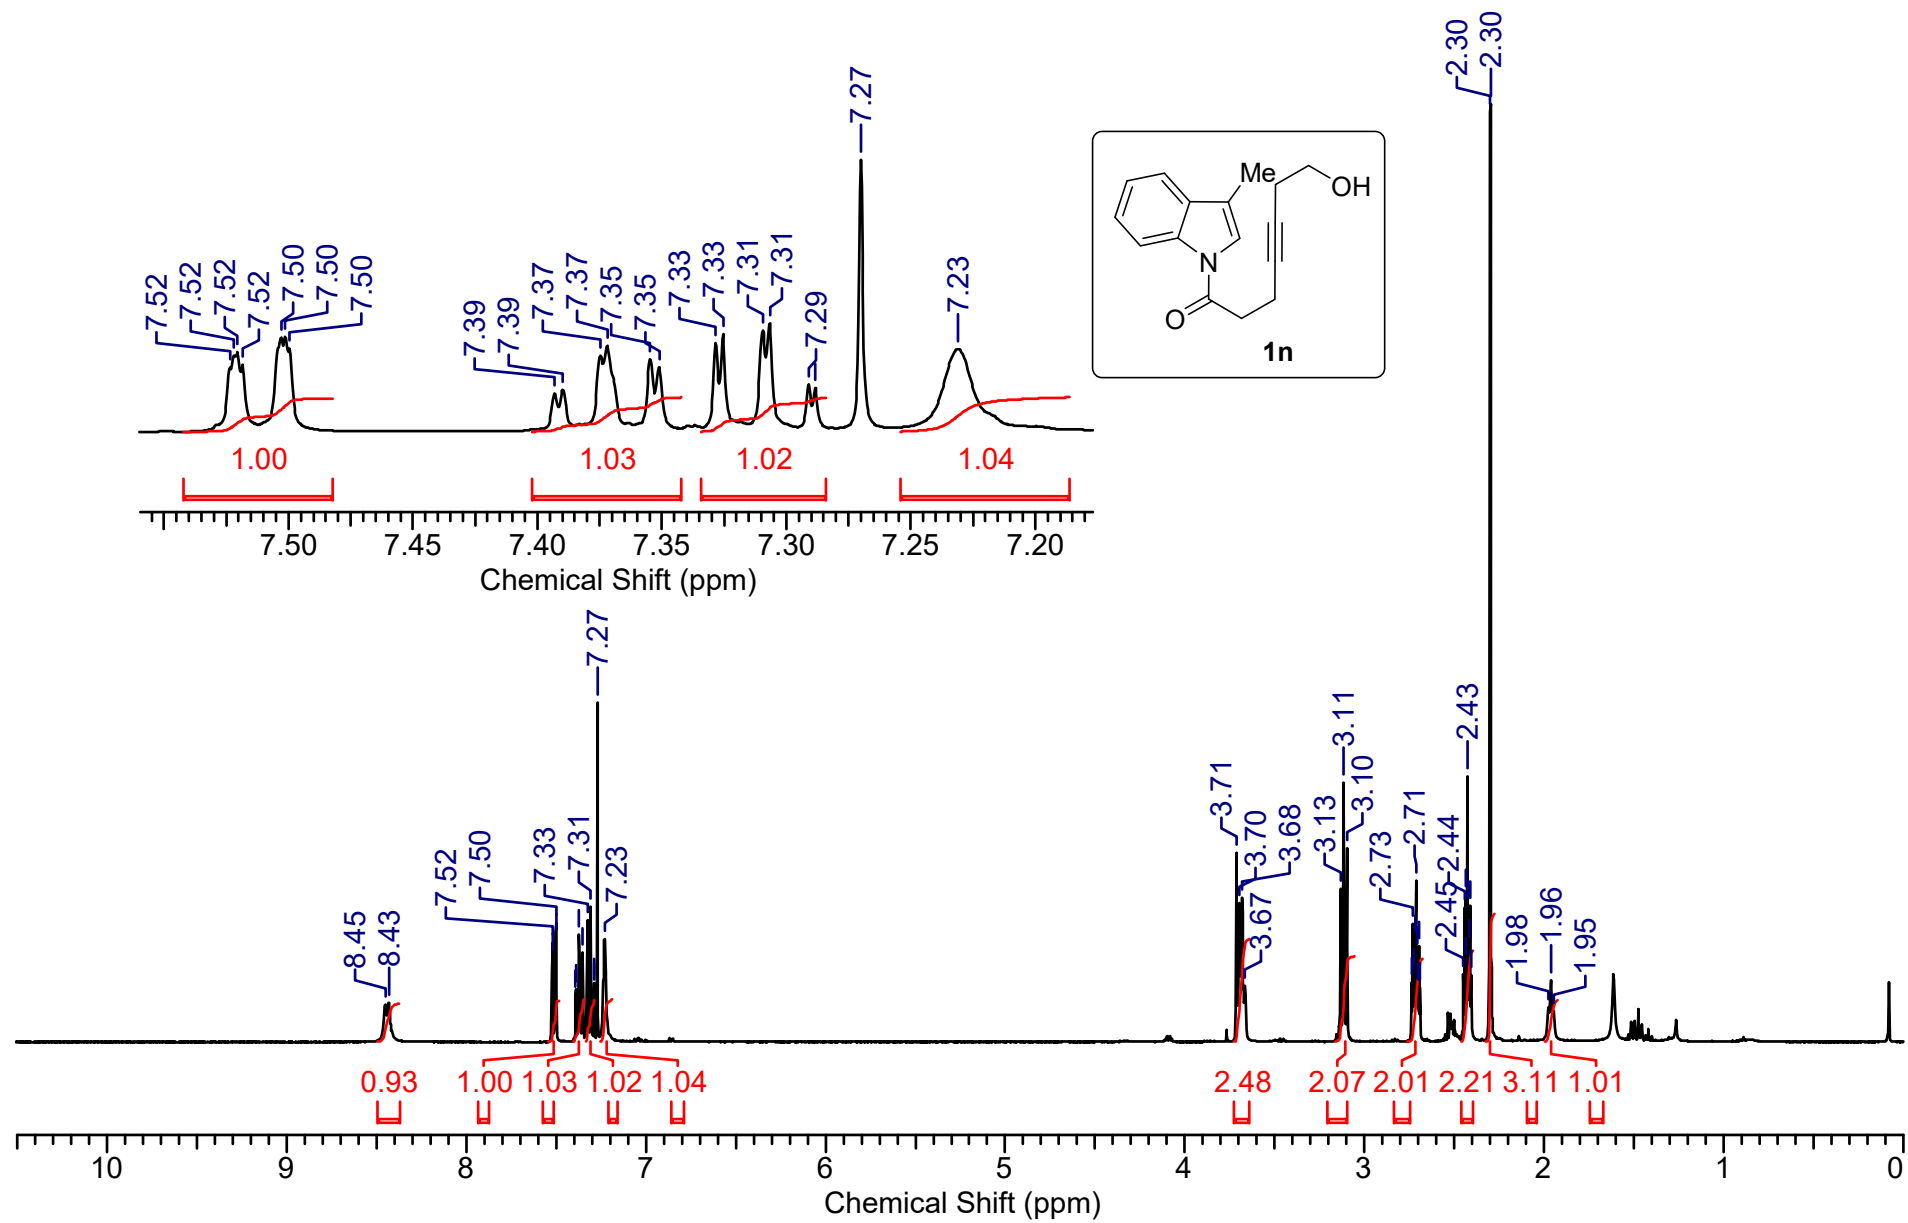



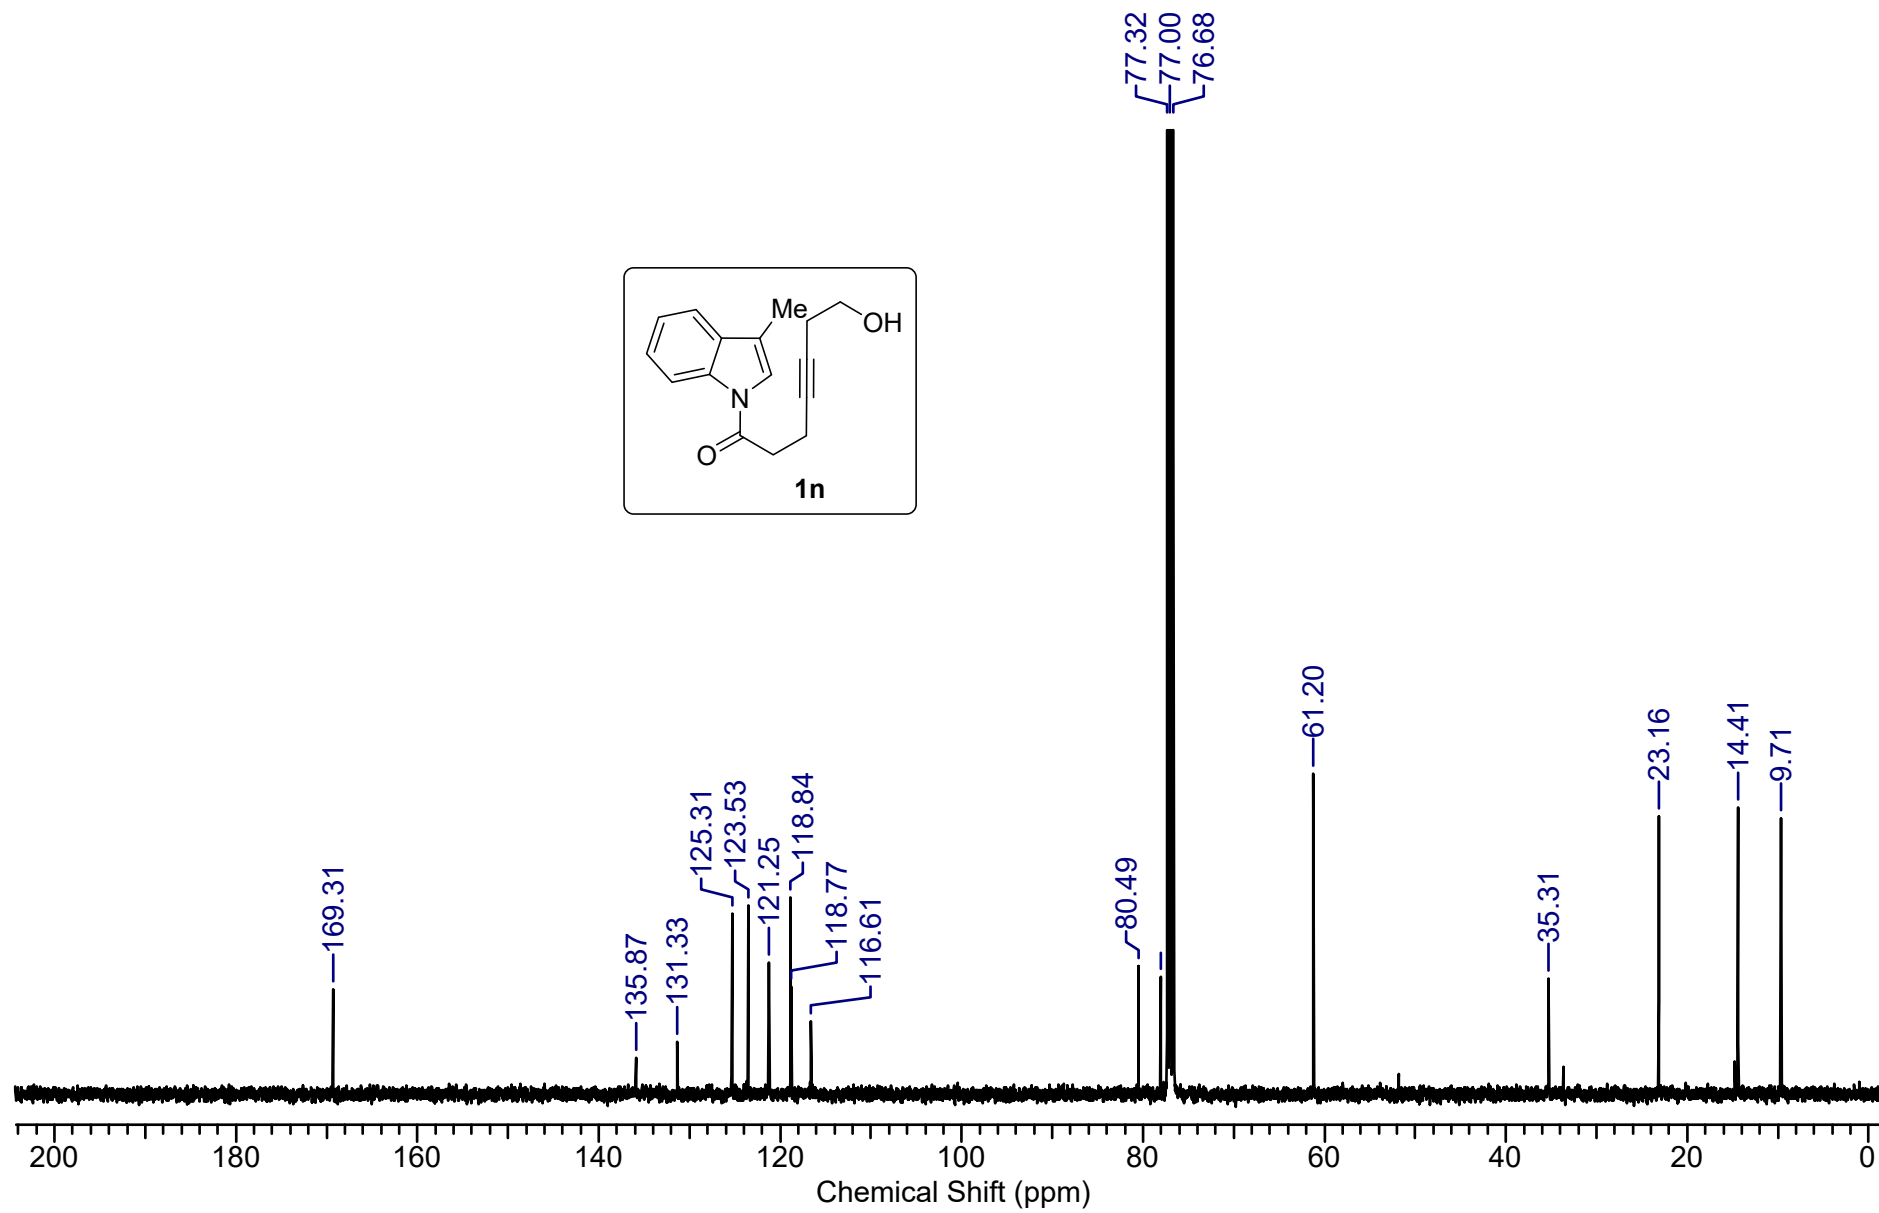

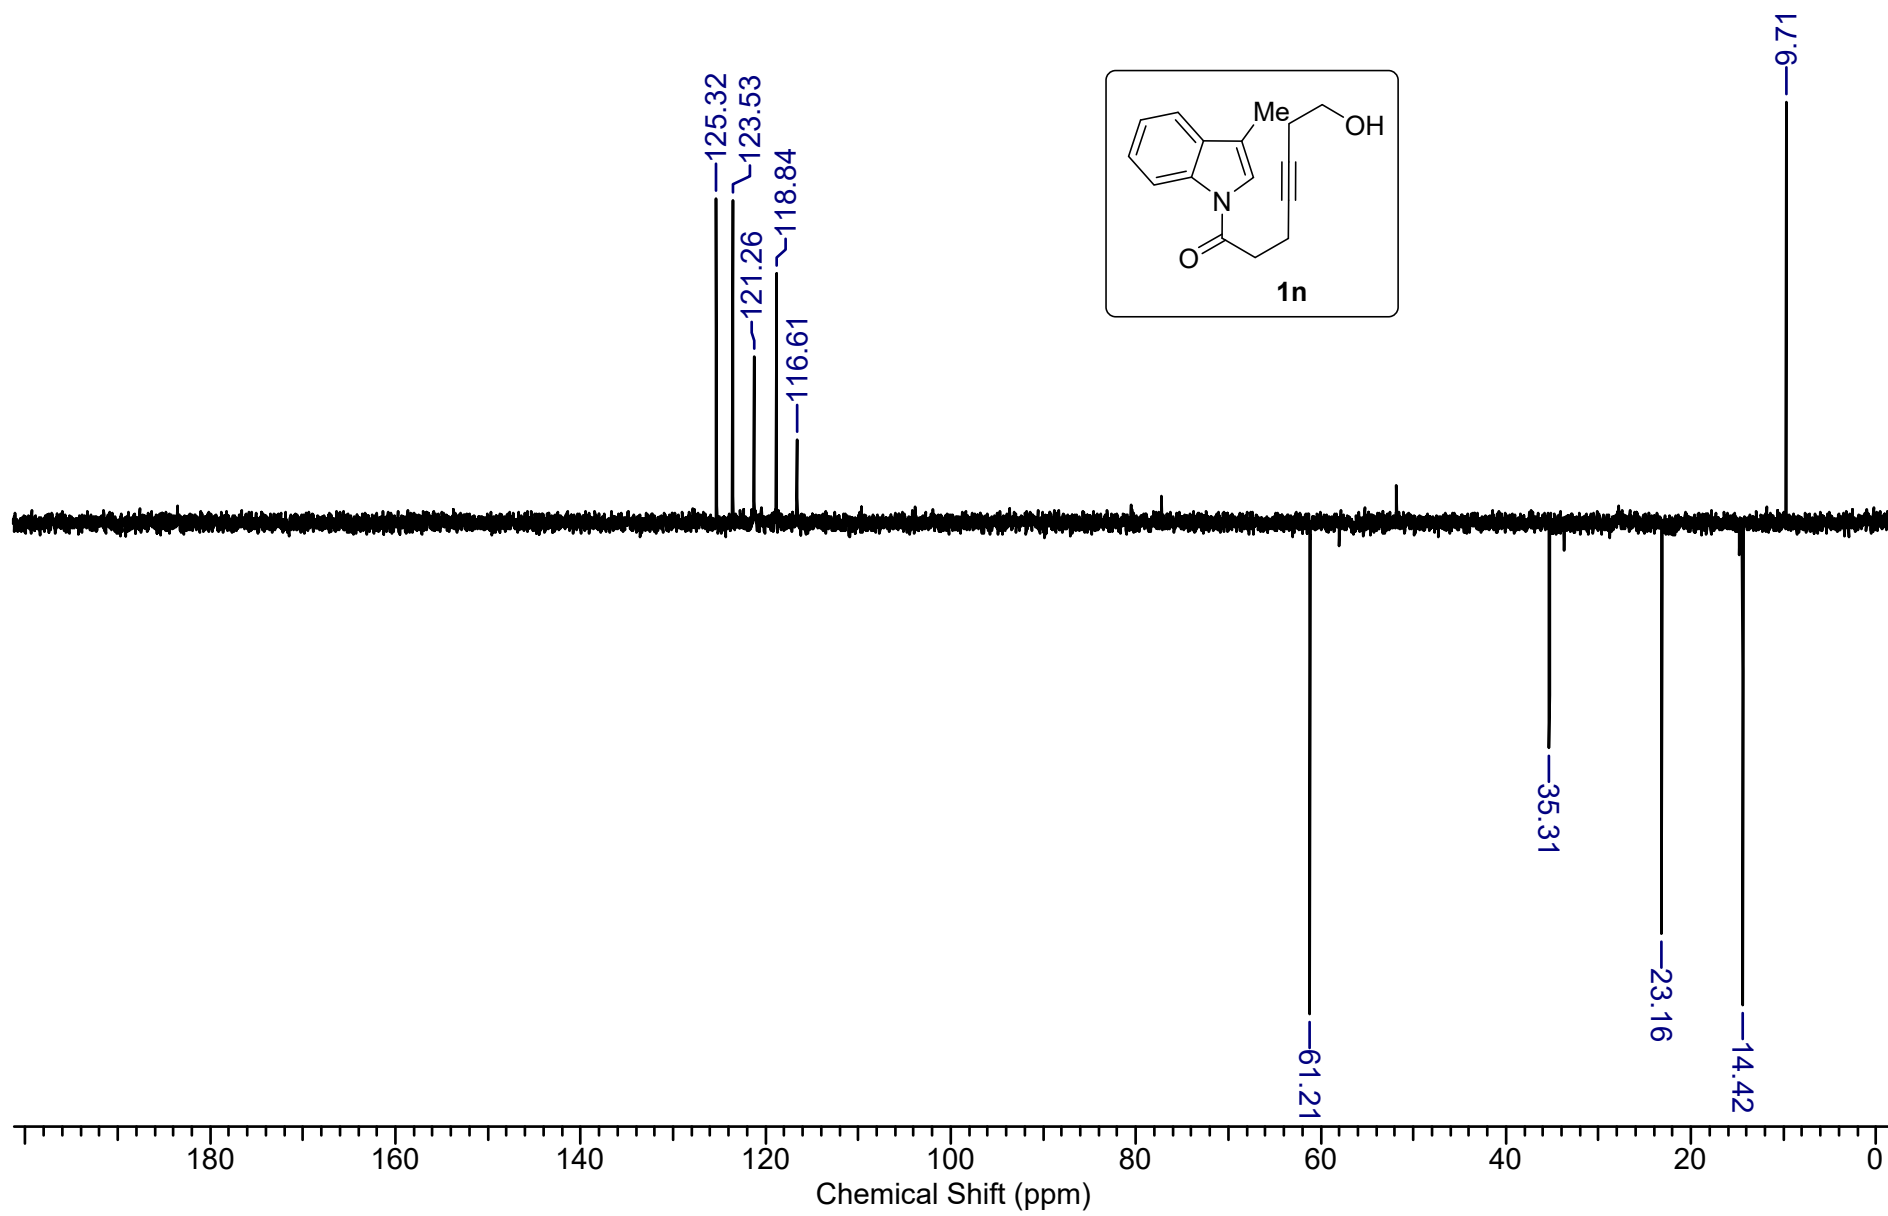

MS-10 #275 RT: 1.47 AV: 1 NL: 1.83E8  
T: FTMS + p ESI Full ms [100.0000-1500.0000]

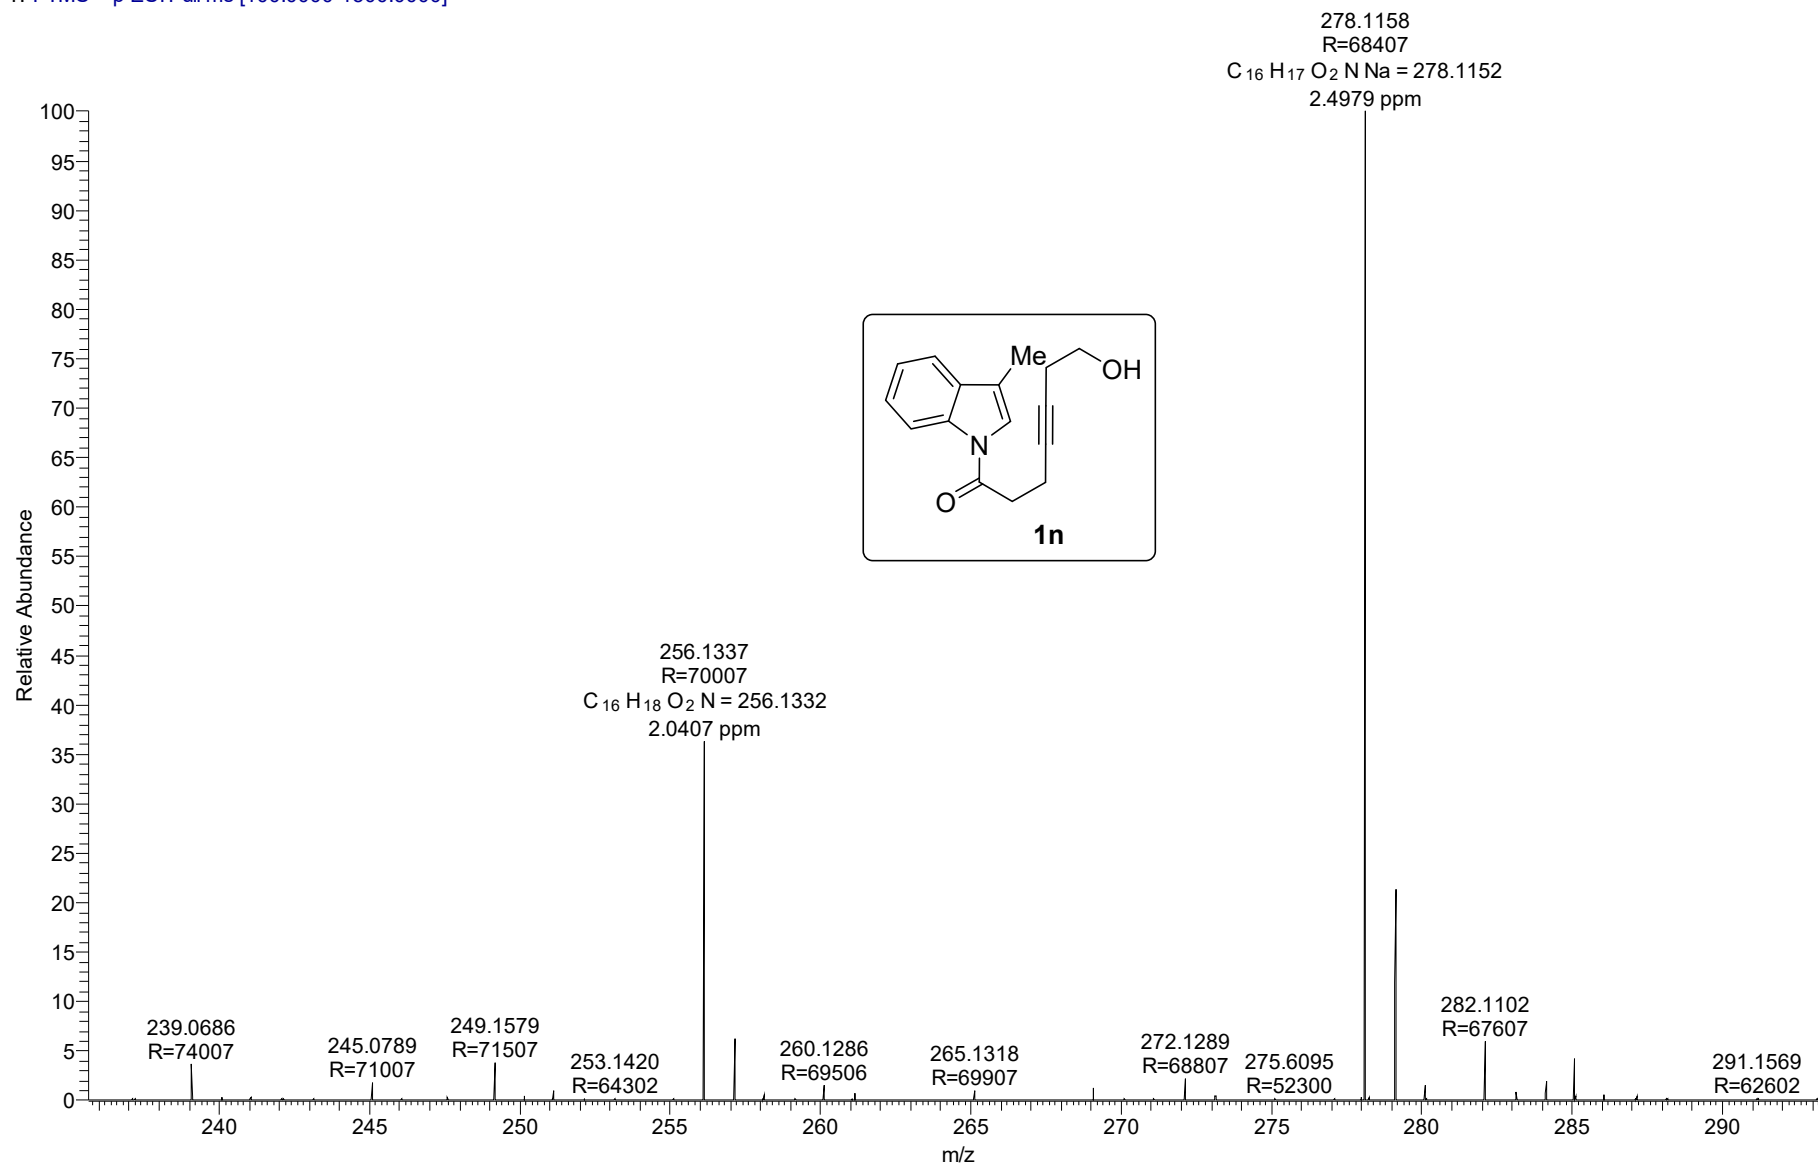

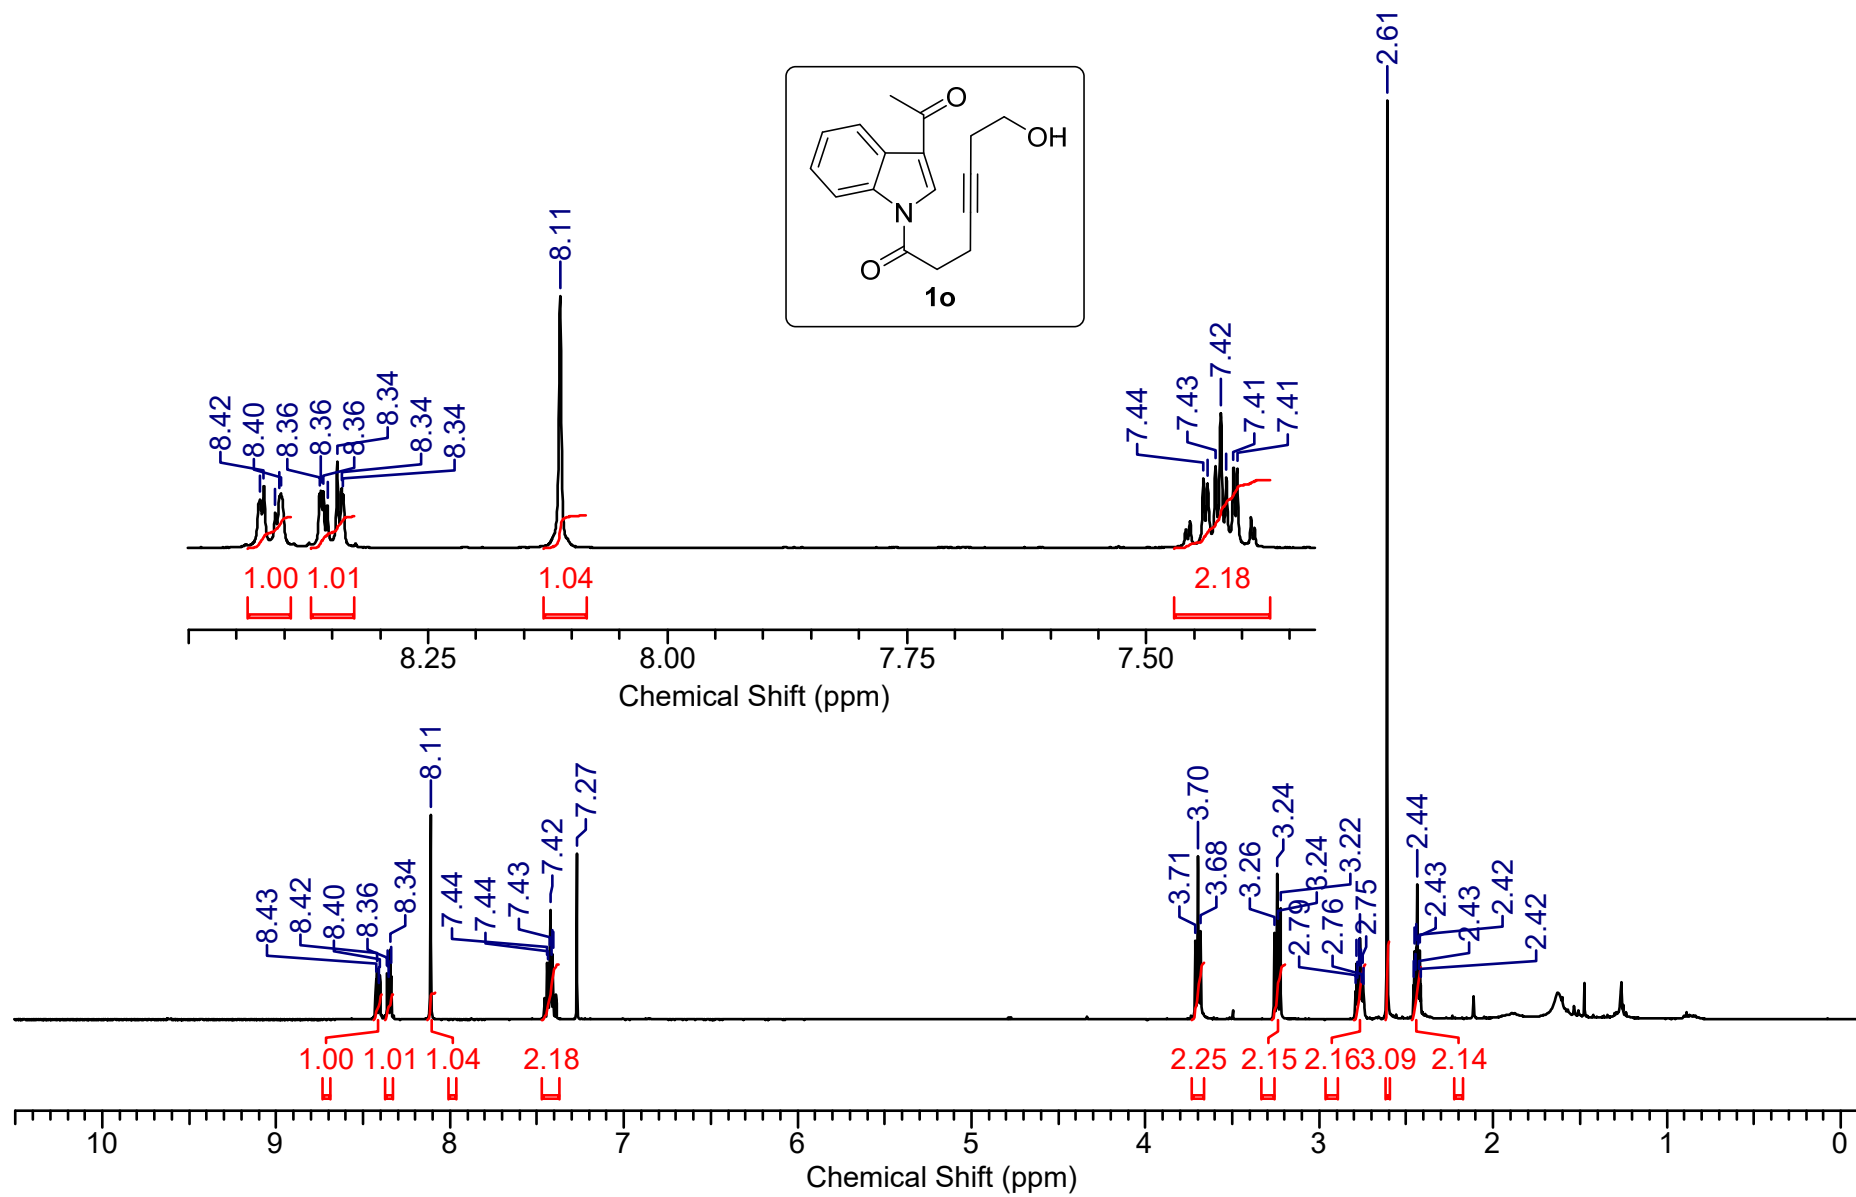

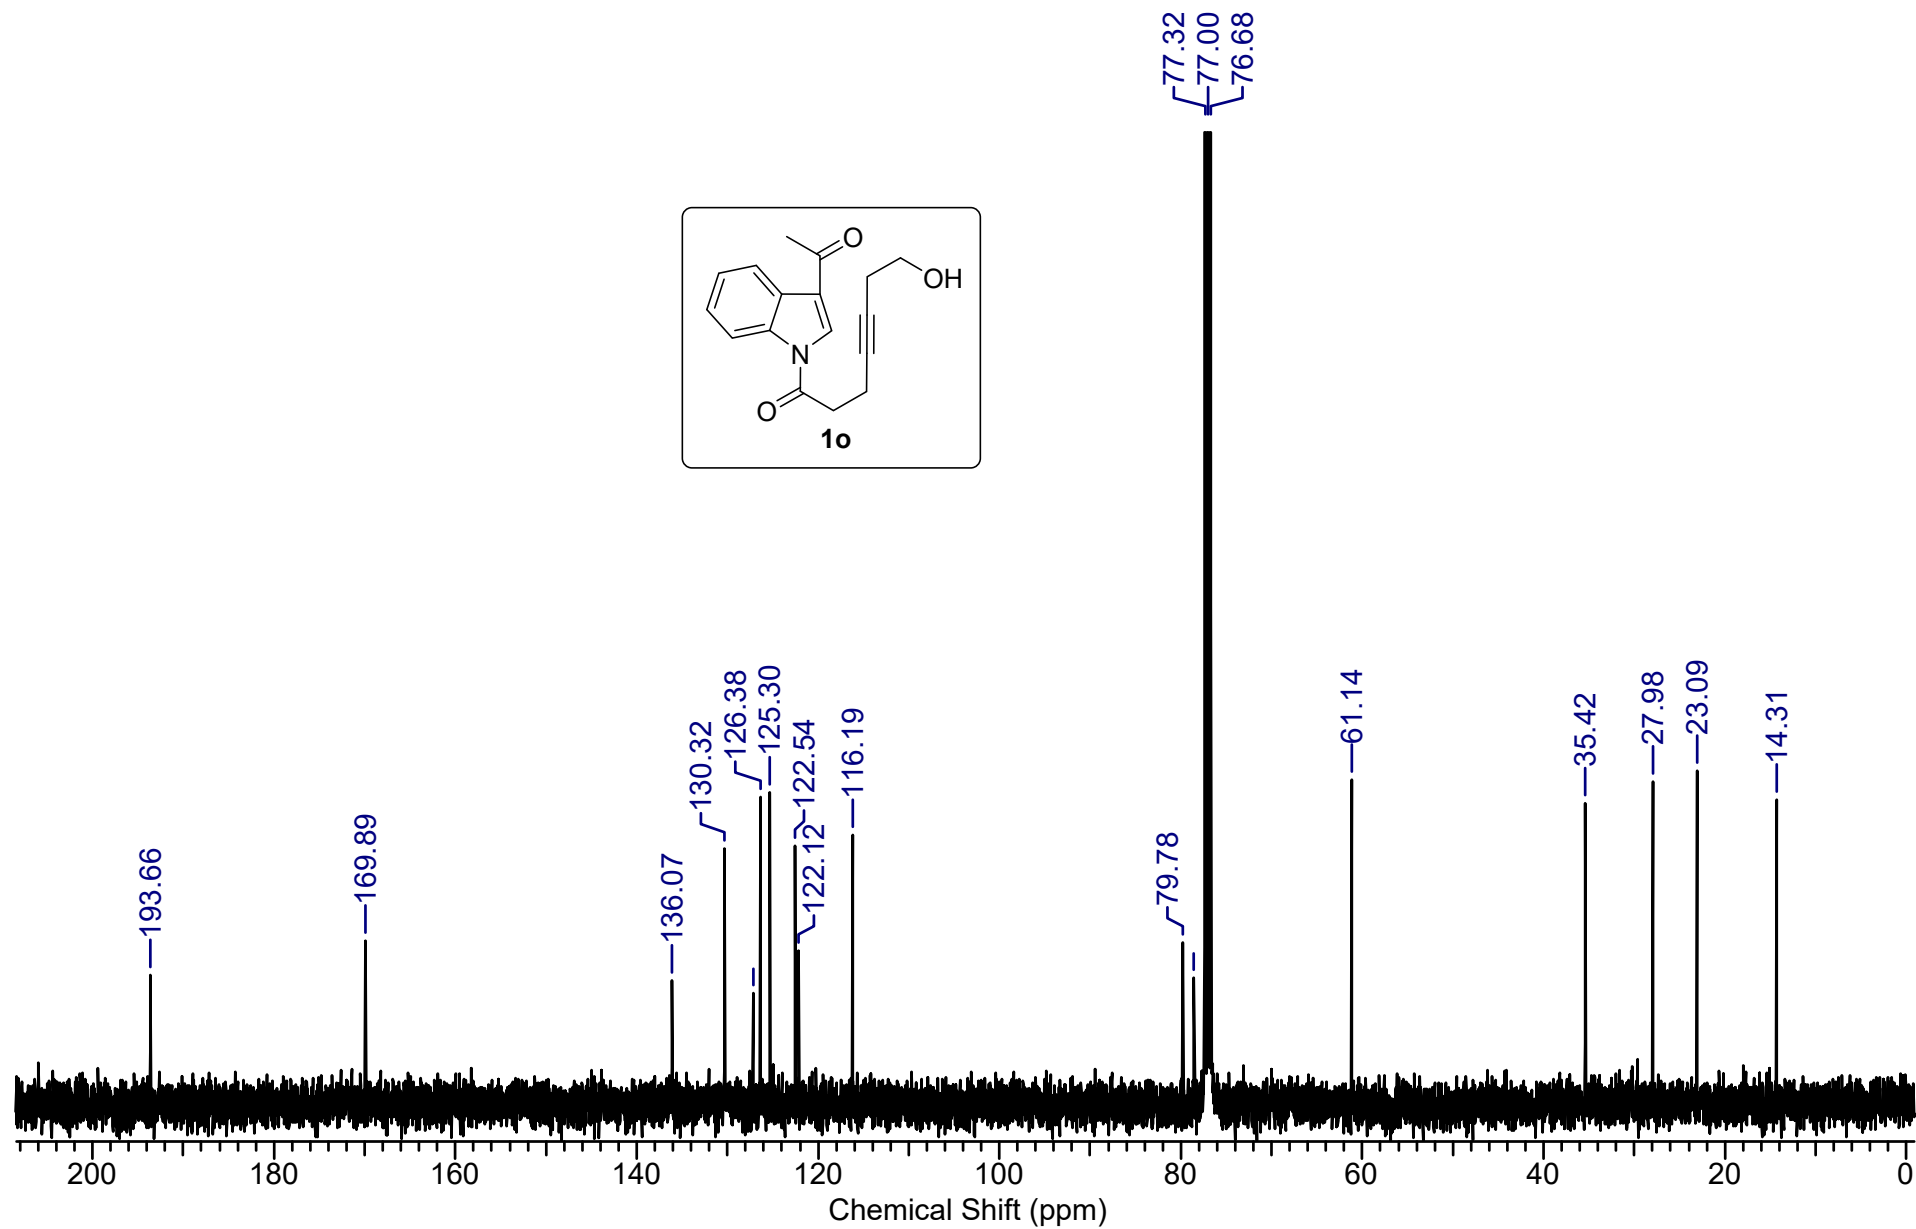

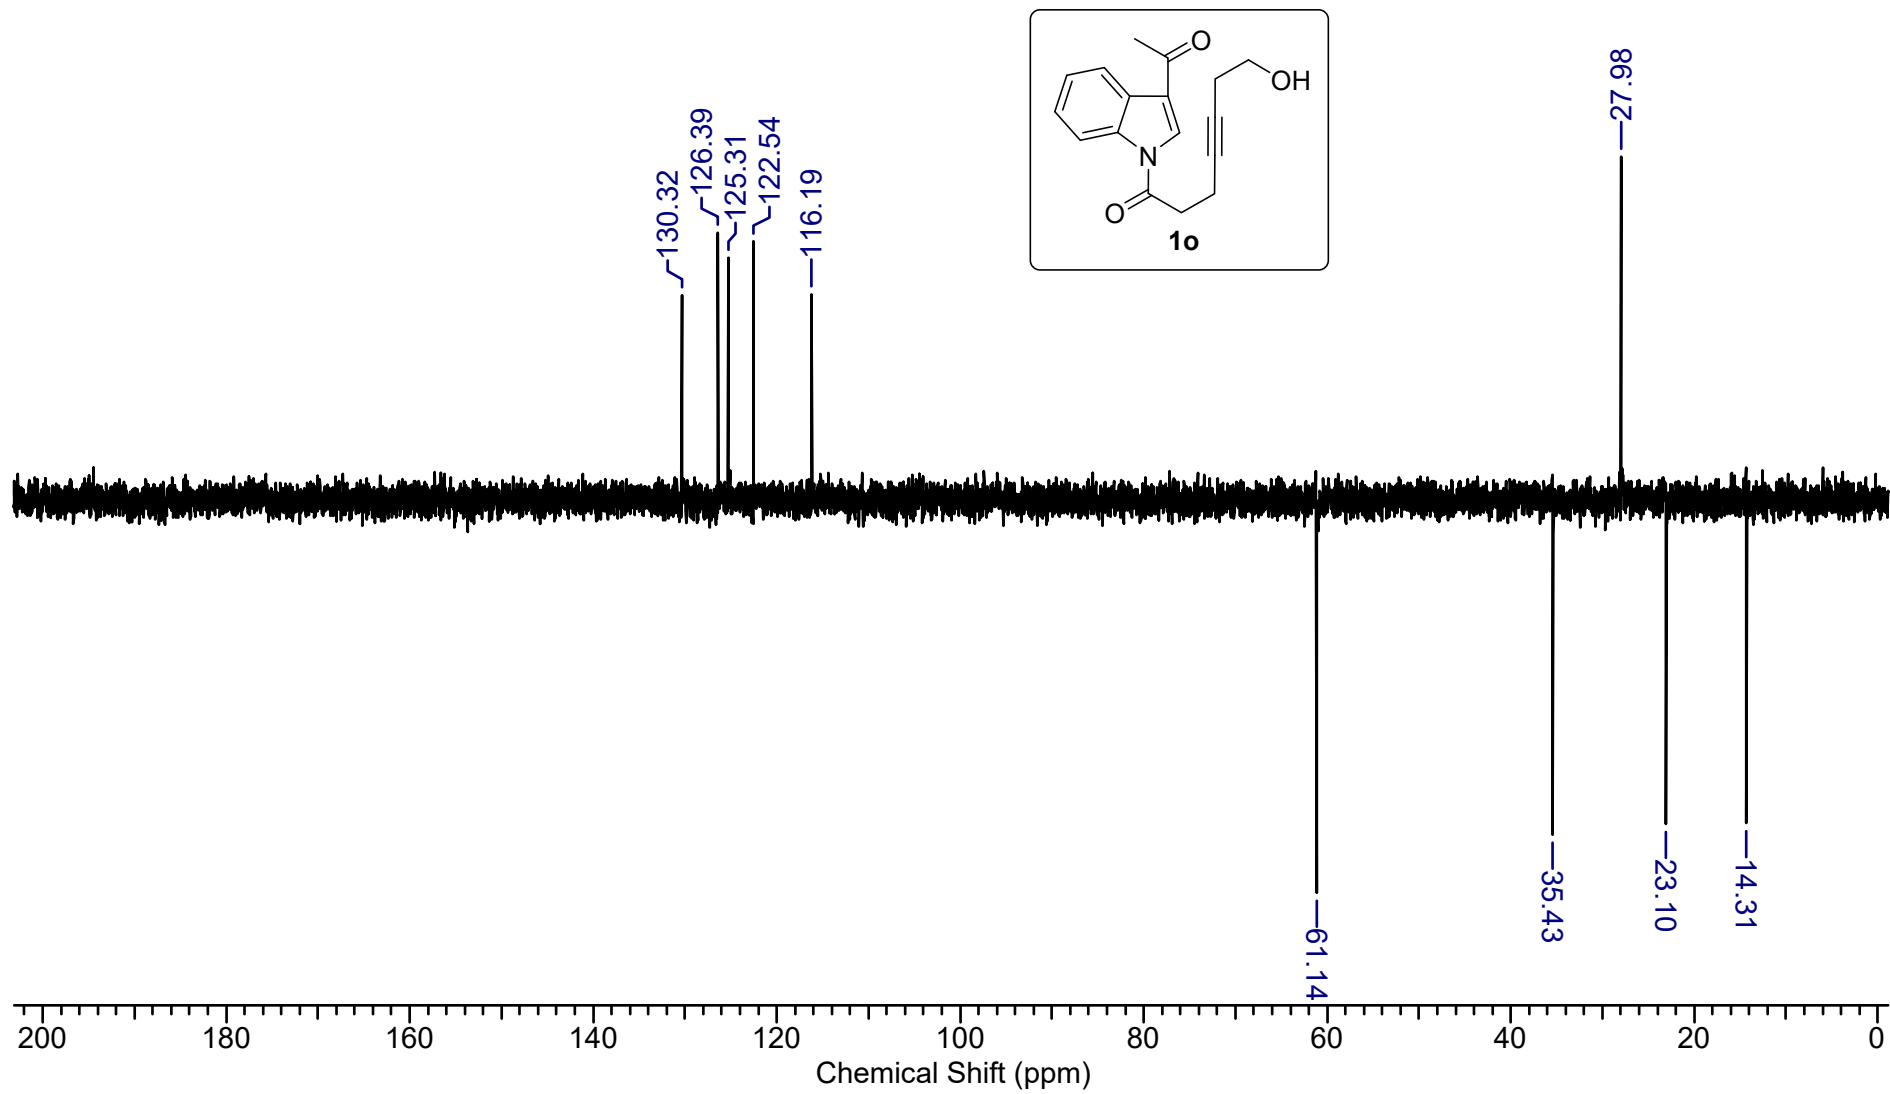

MS-9 #268 RT: 1.43 AV: 1 NL: 3.62E8  
T: FTMS + p ESI Full ms [100.0000-1500.0000]

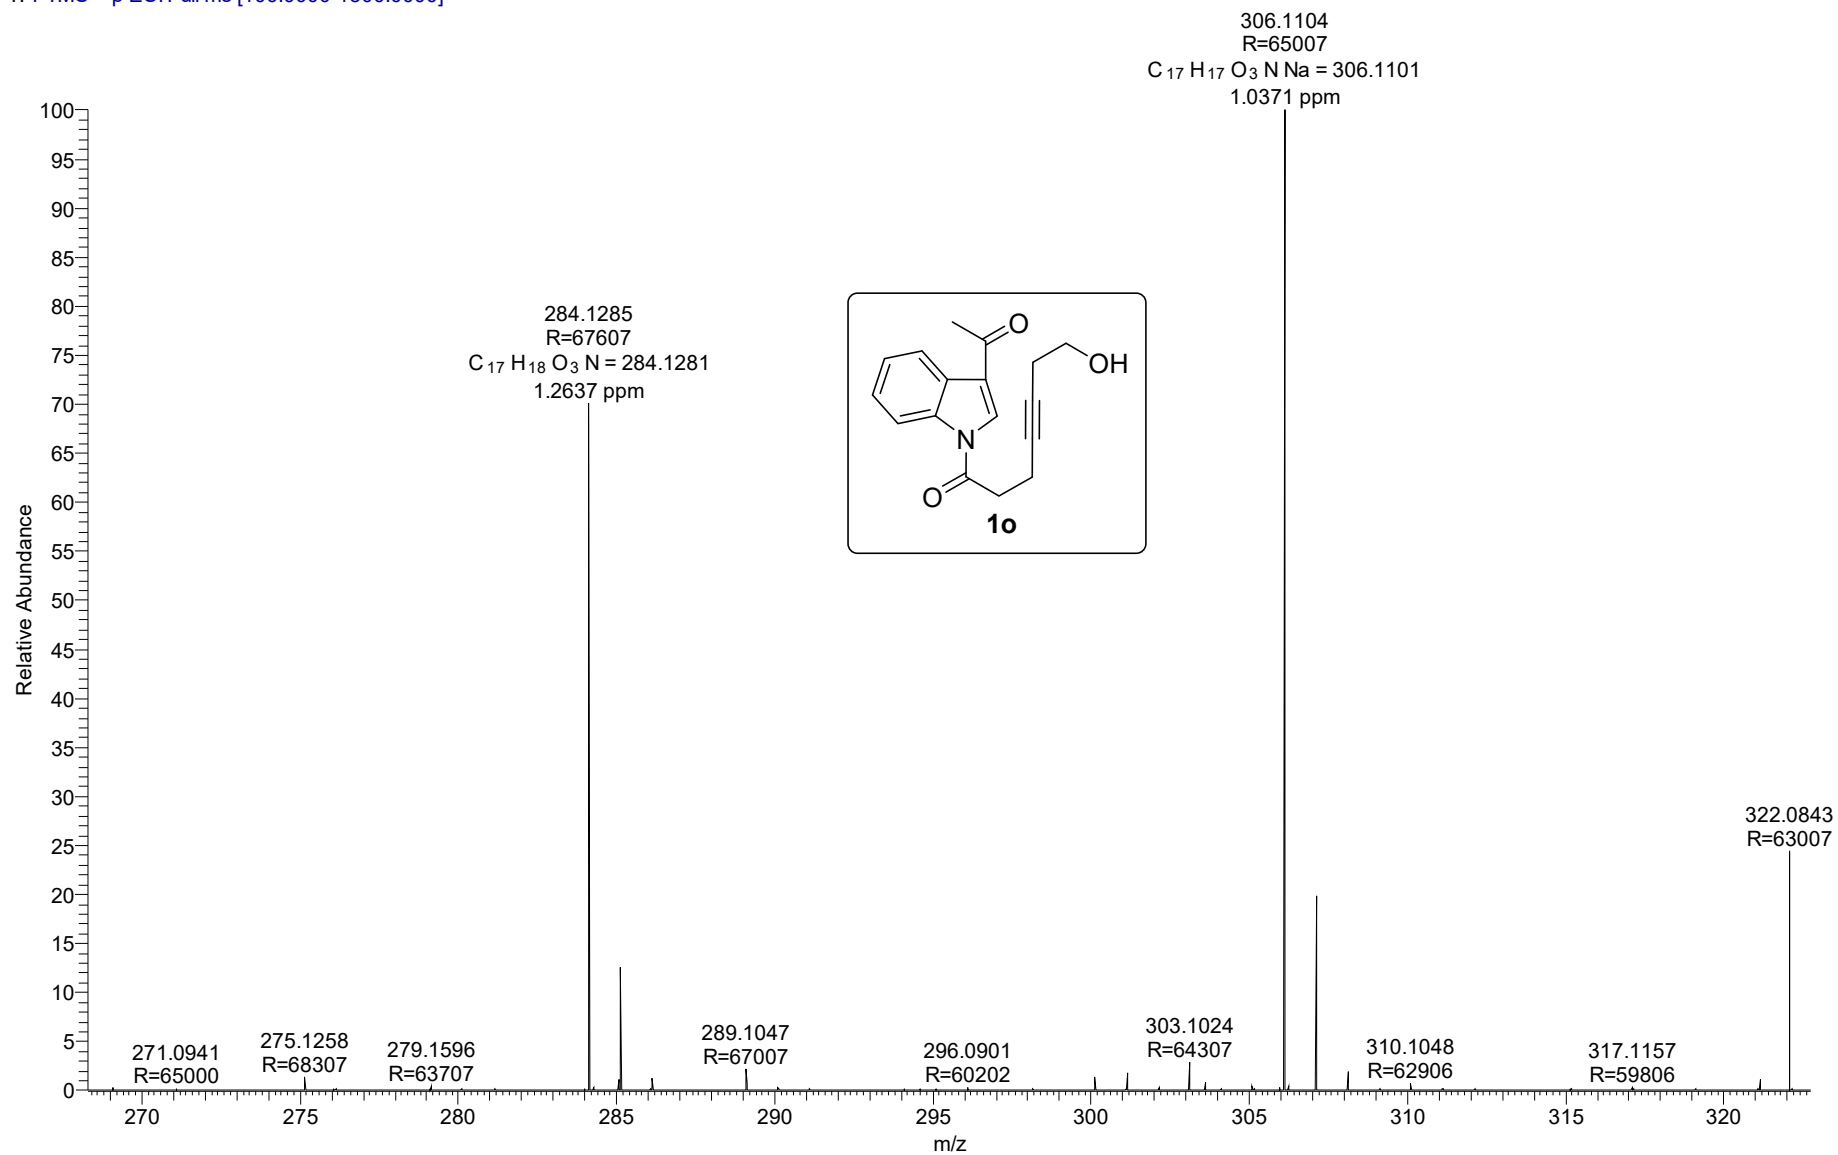

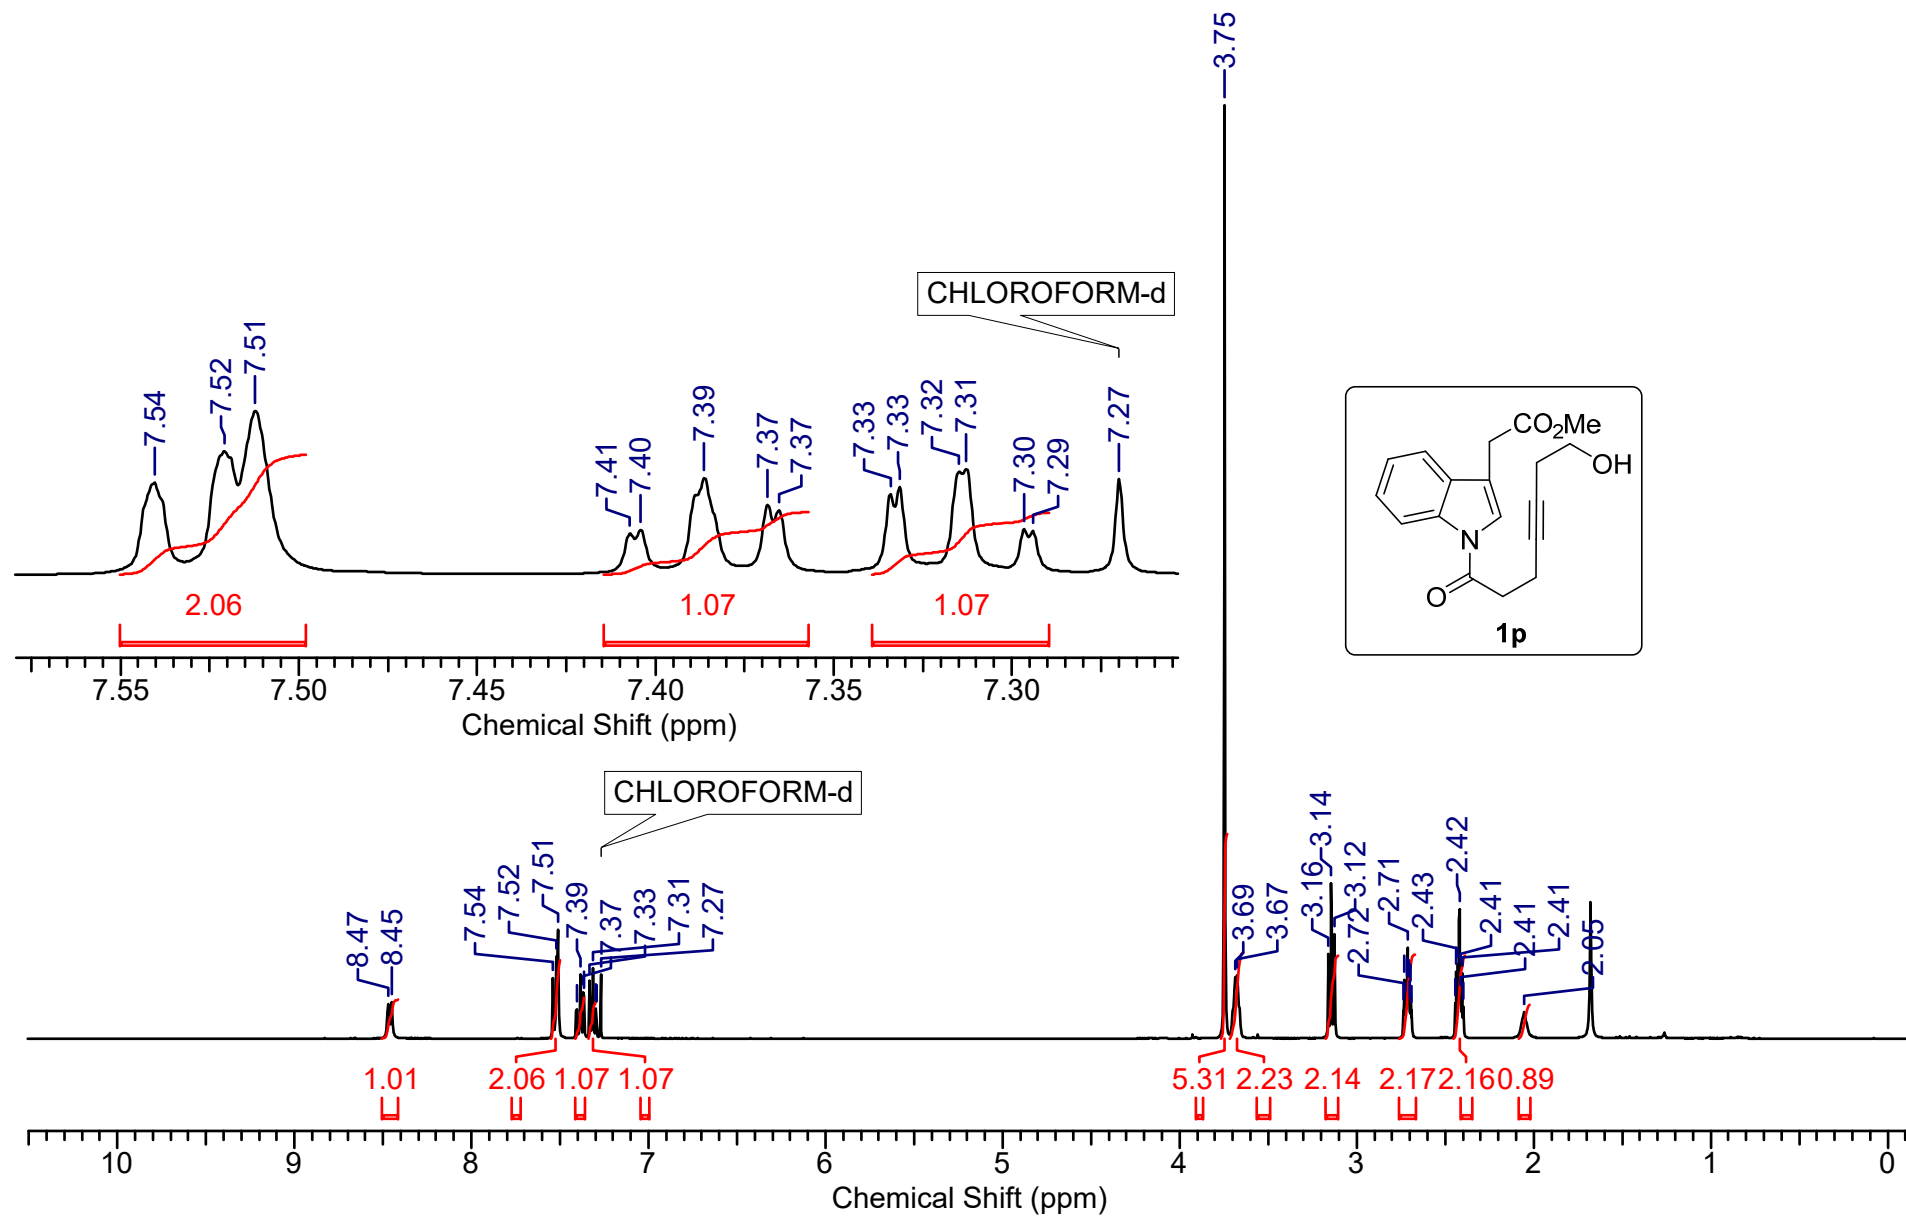



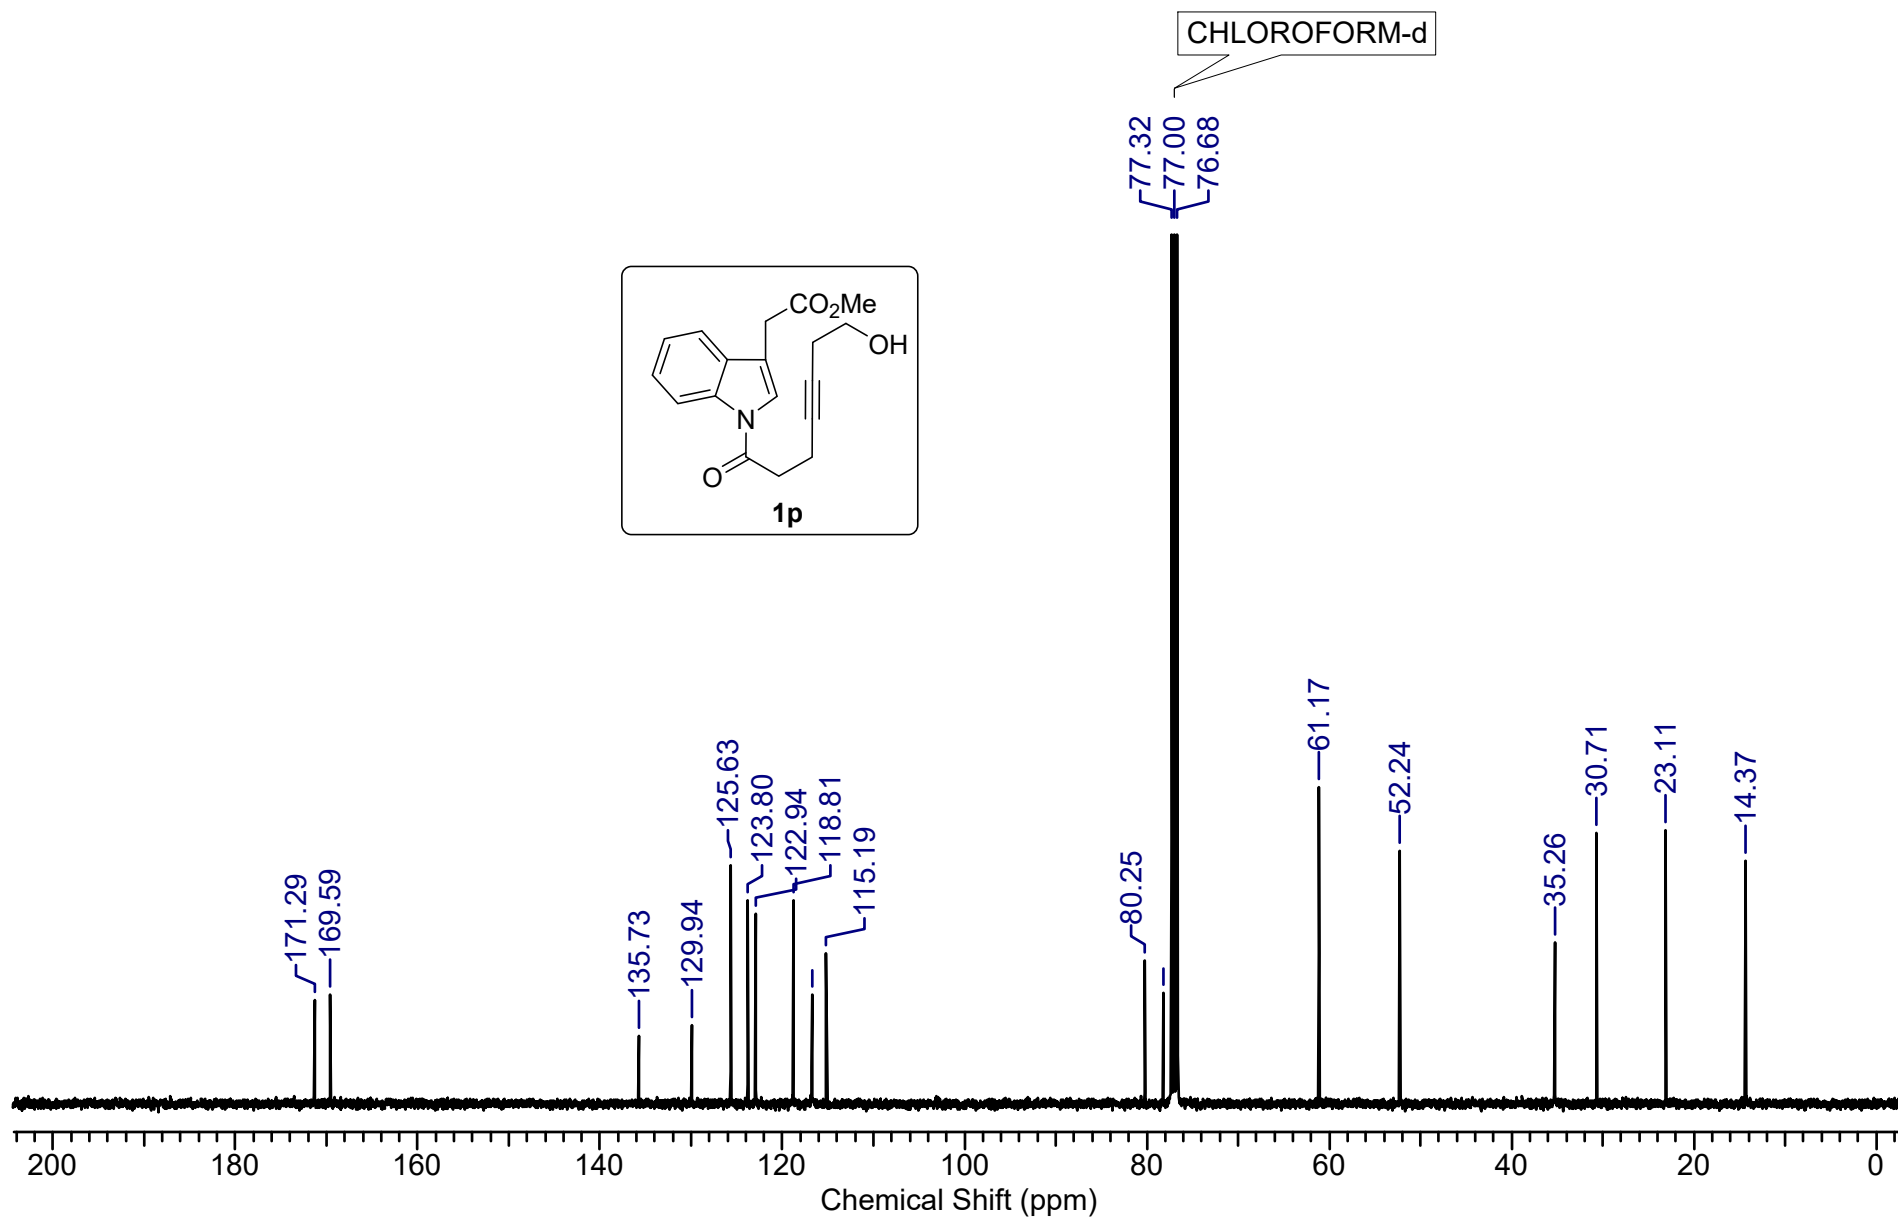

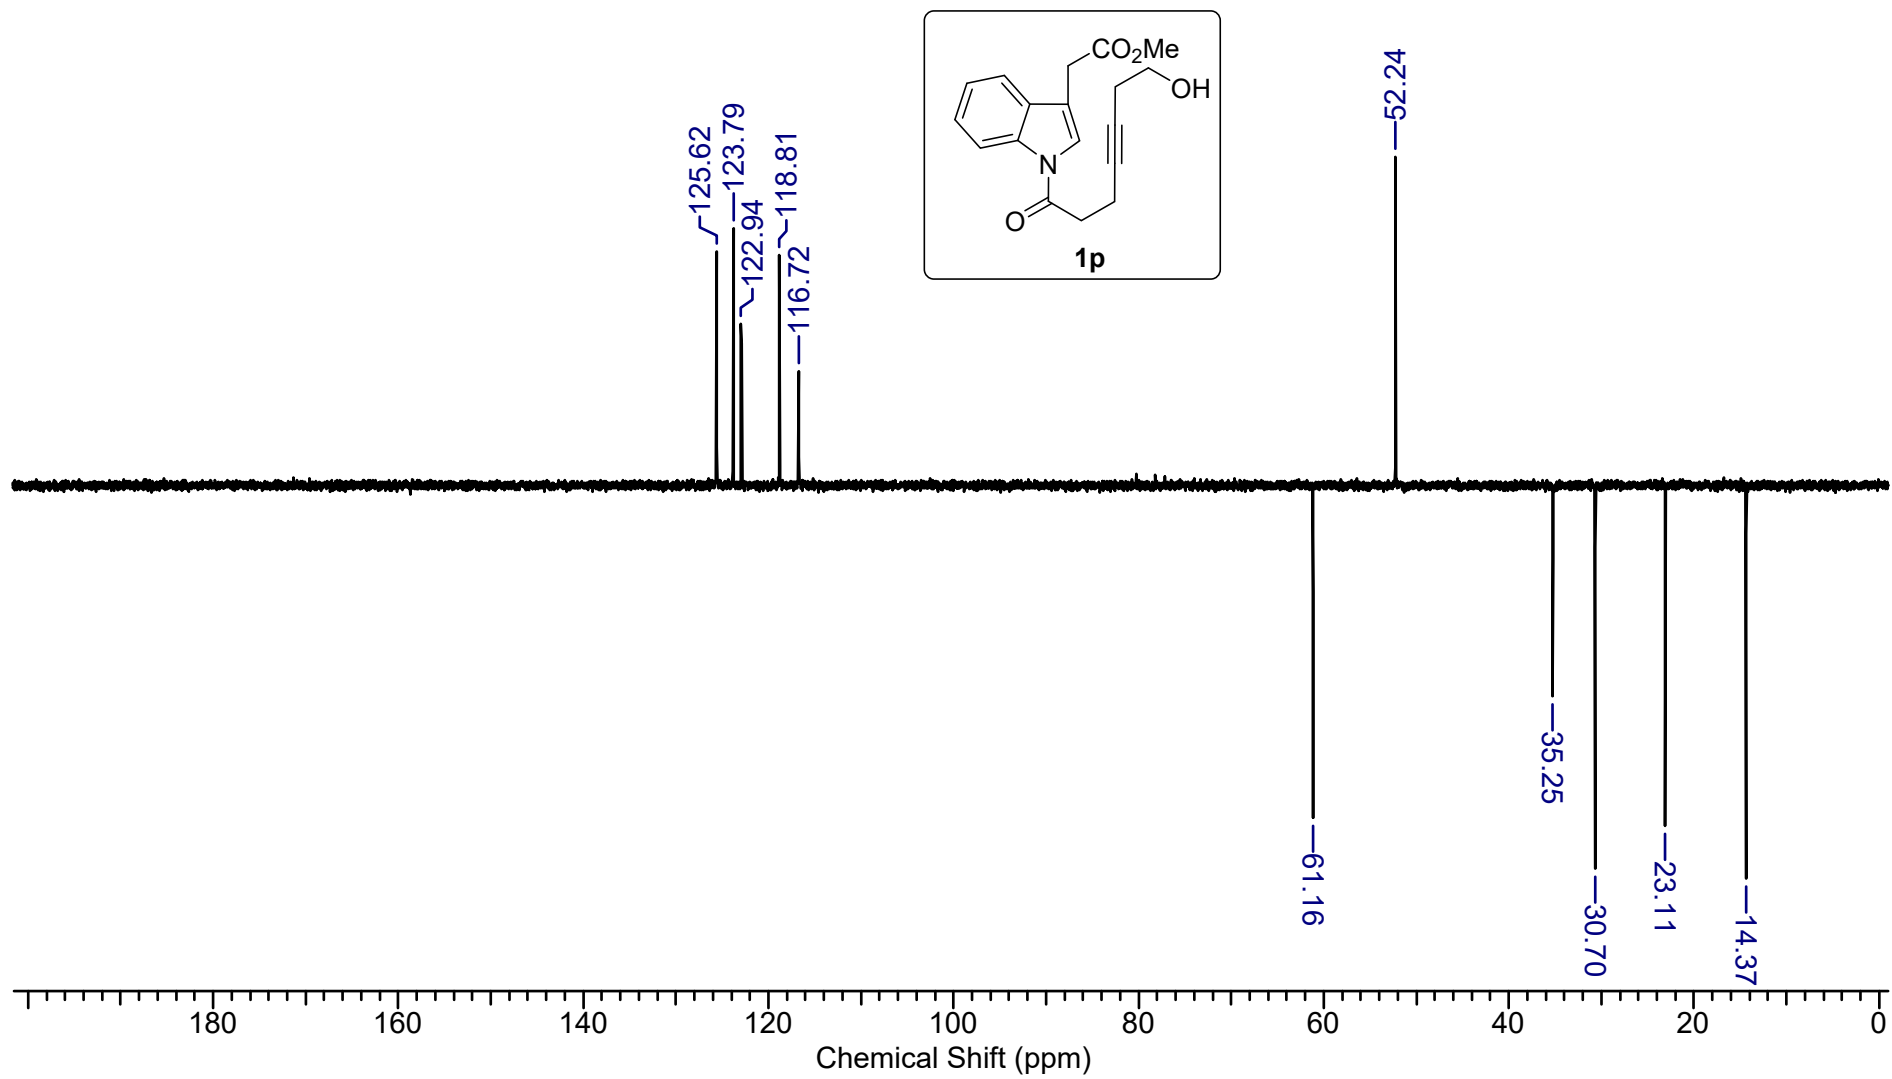

MSH-39 #267 RT: 1.46 AV: 1 NL: 5.41E8  
T: FTMS + p ESI Full ms [100.0000-1500.0000]

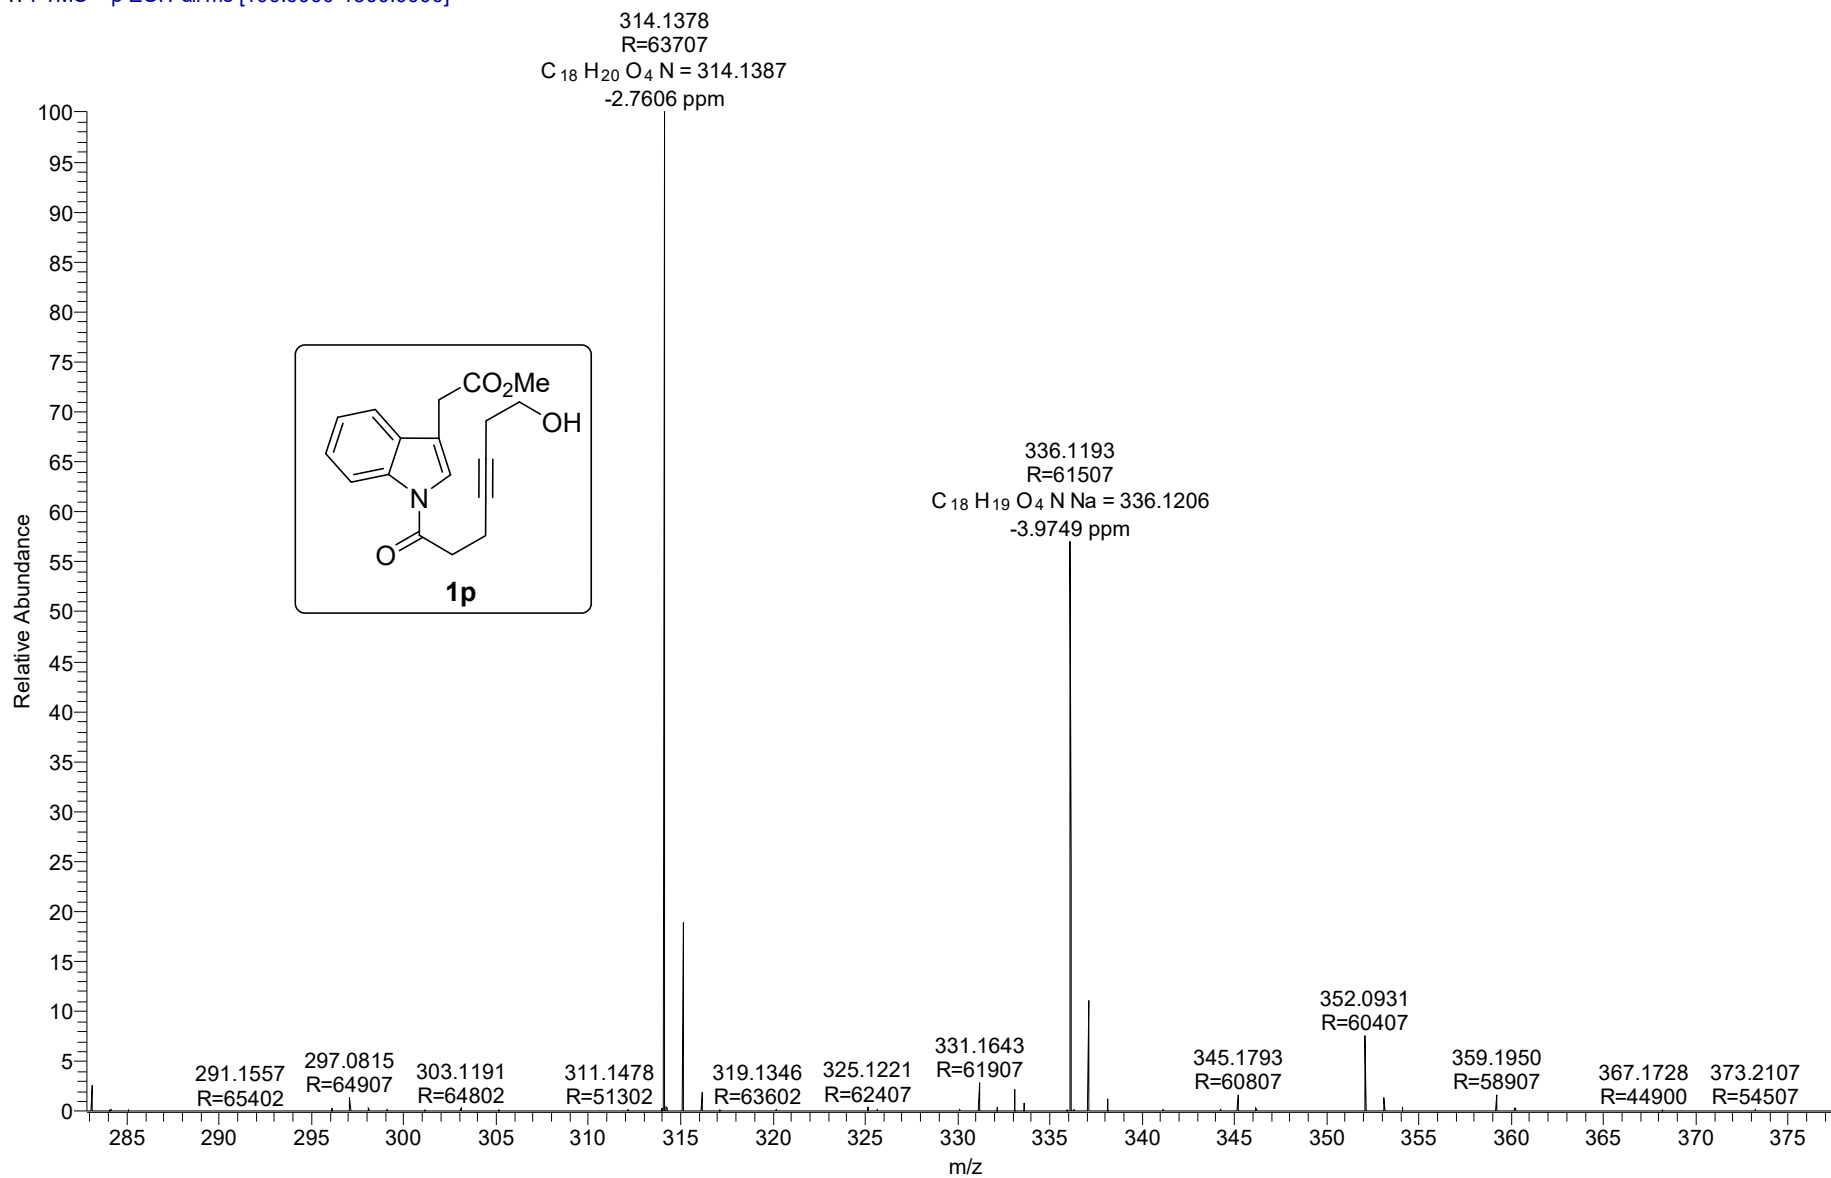

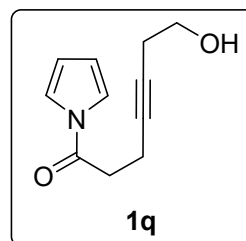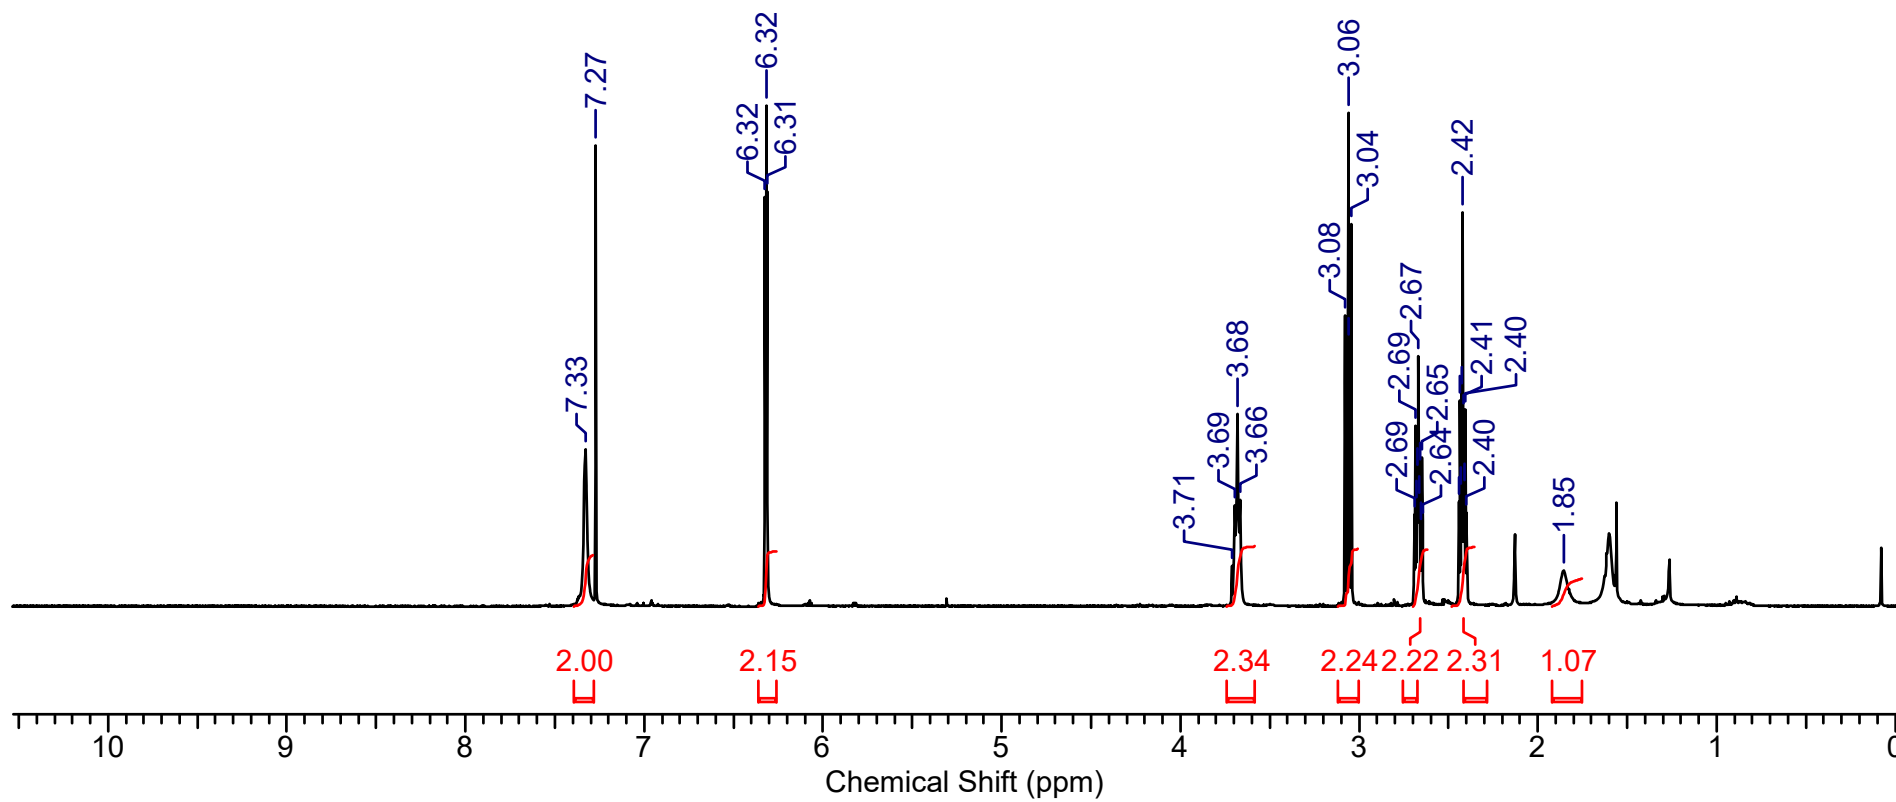

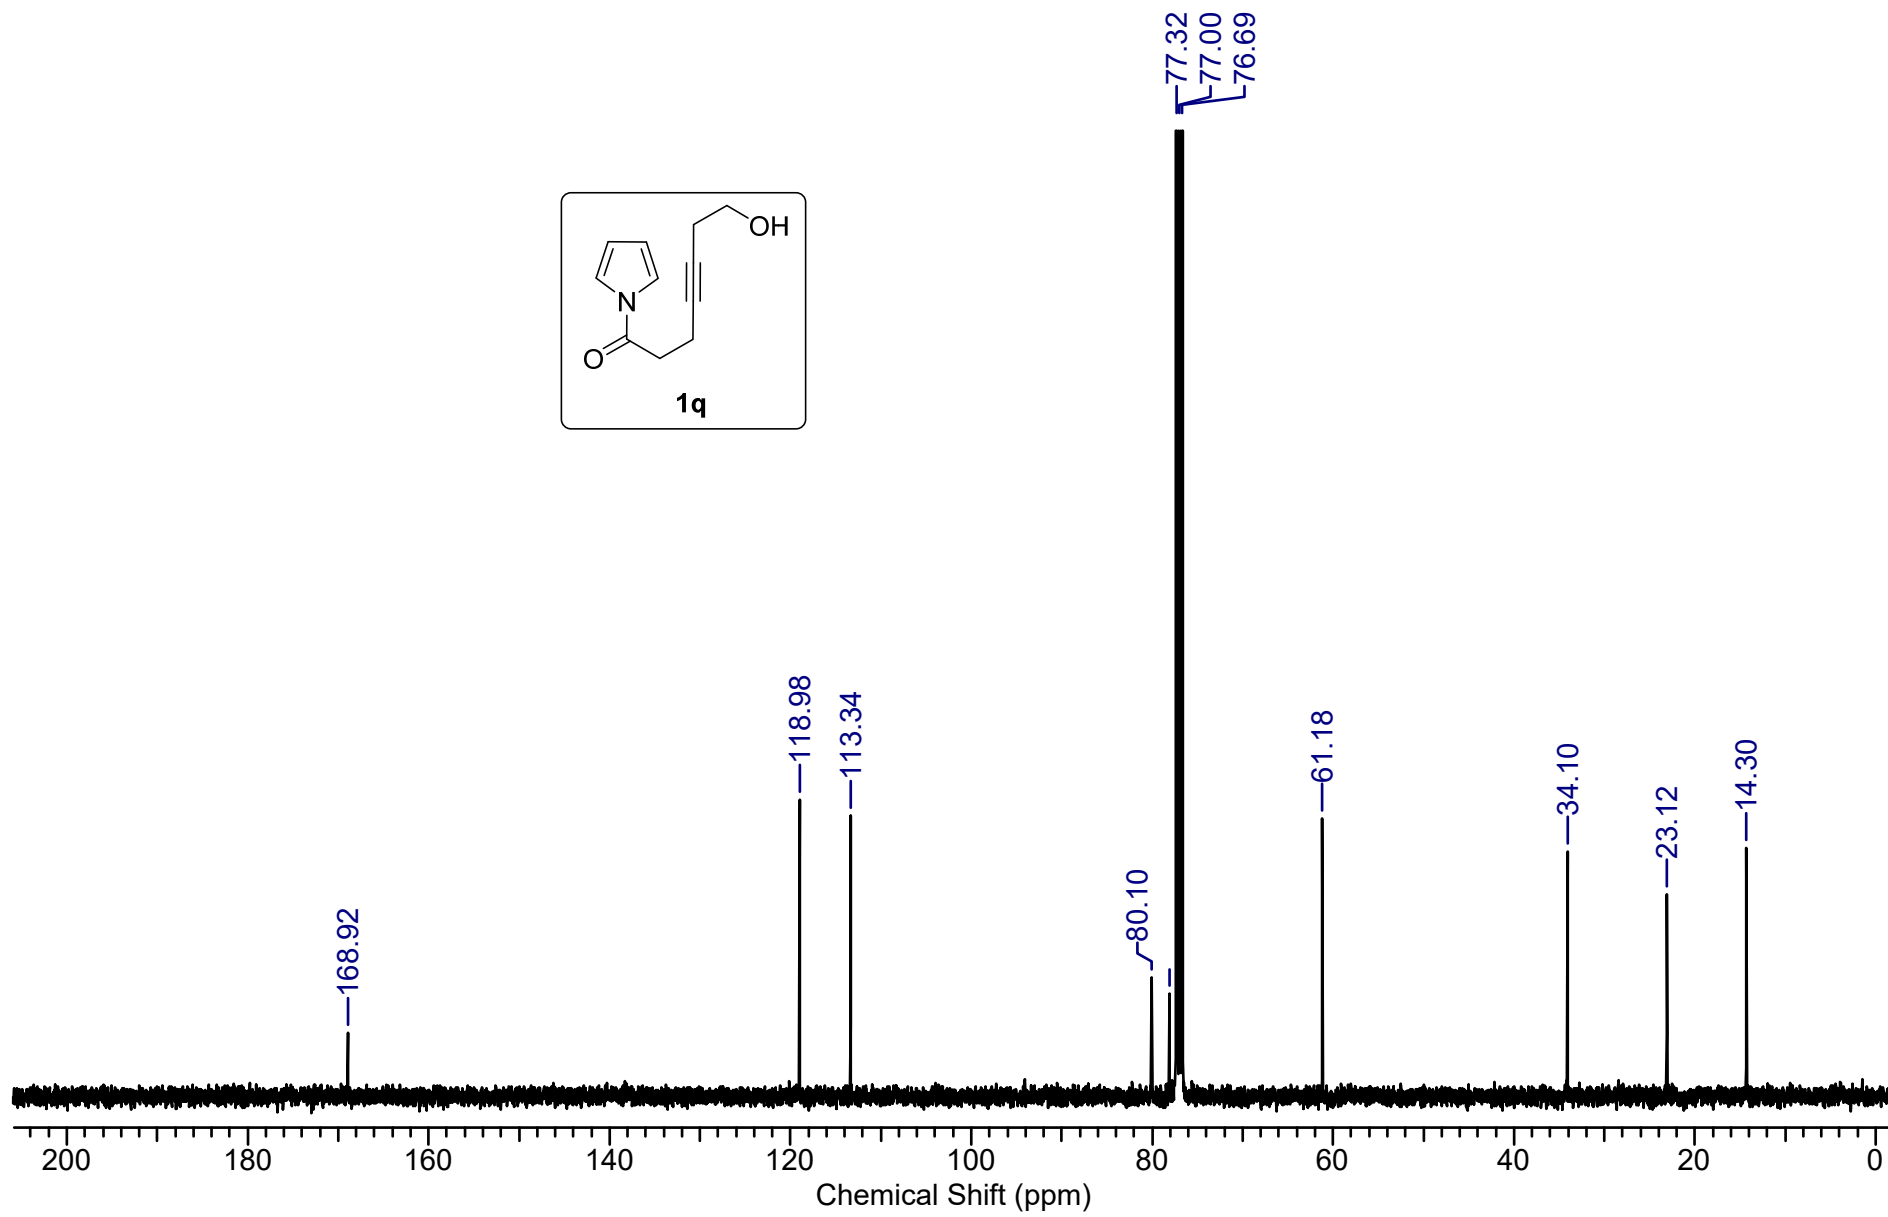

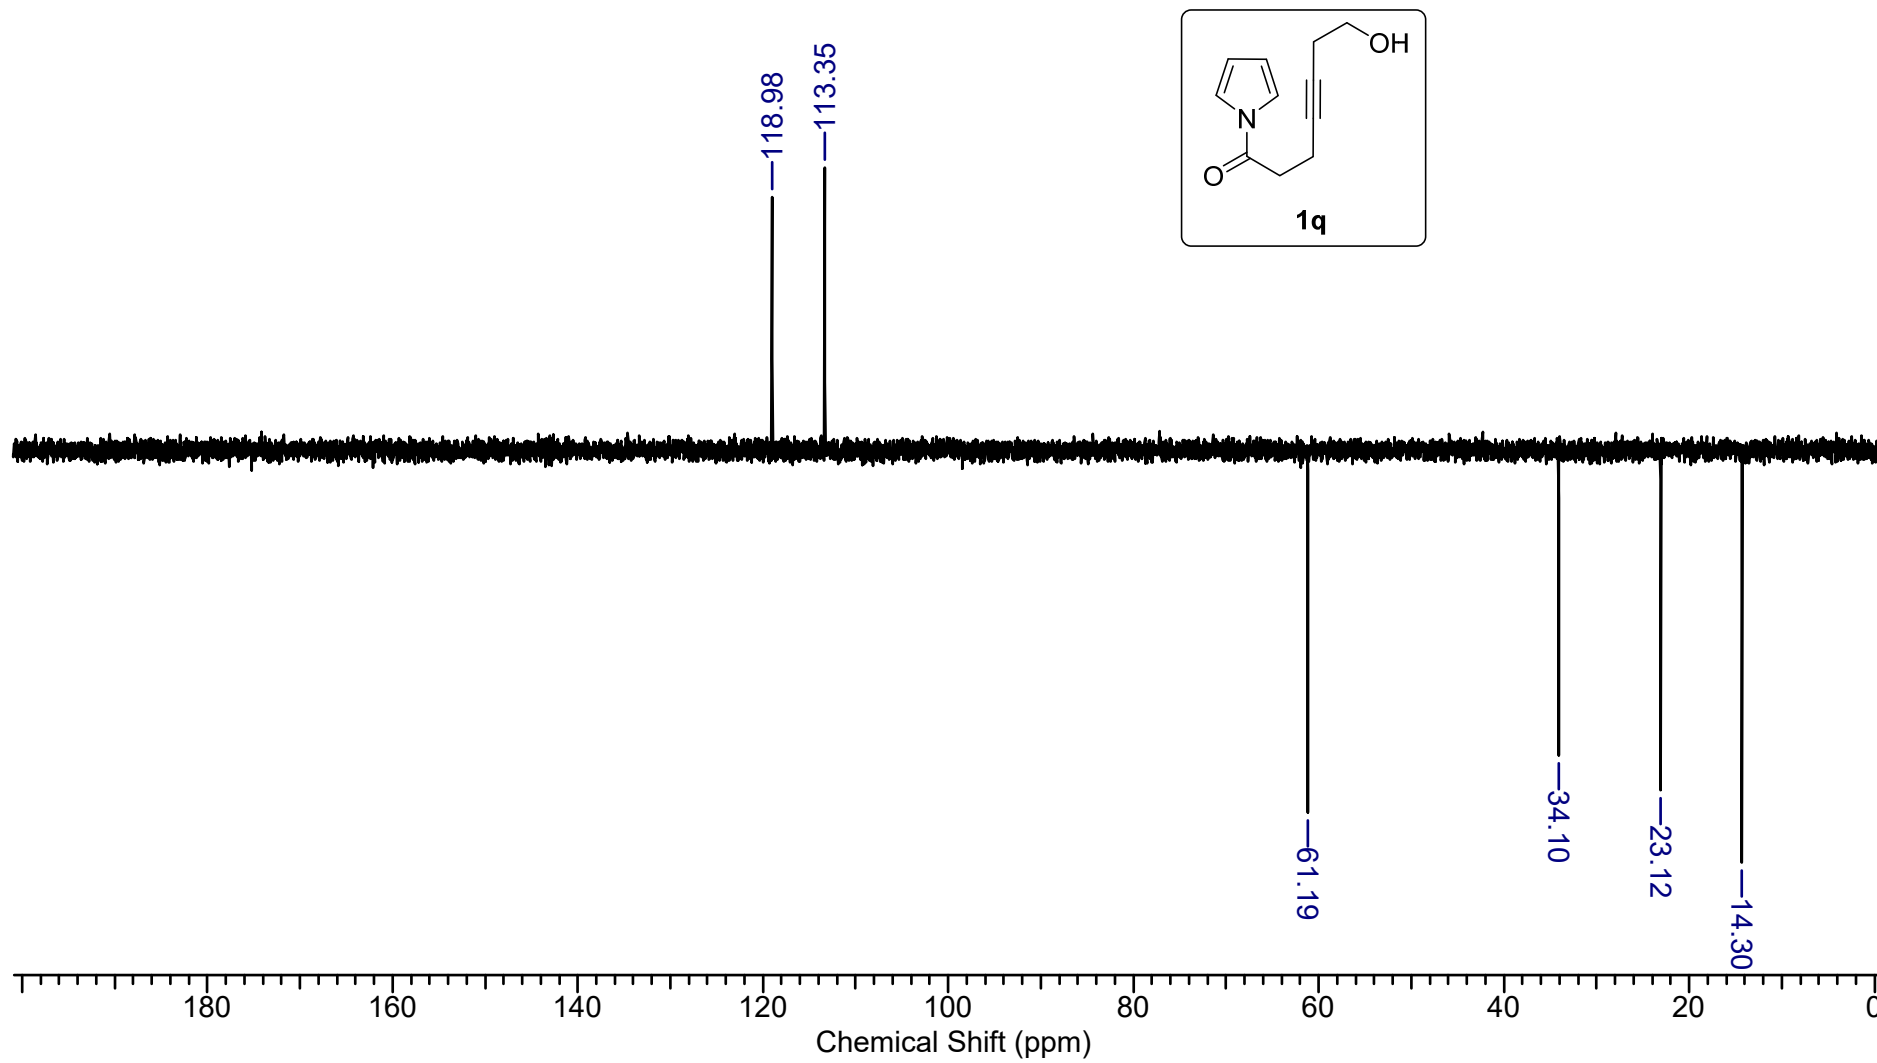

MS-14 #257 RT: 1.38 AV: 1 NL: 2.98E8  
T: FTMS + p ESI Full ms [100.0000-1500.0000]

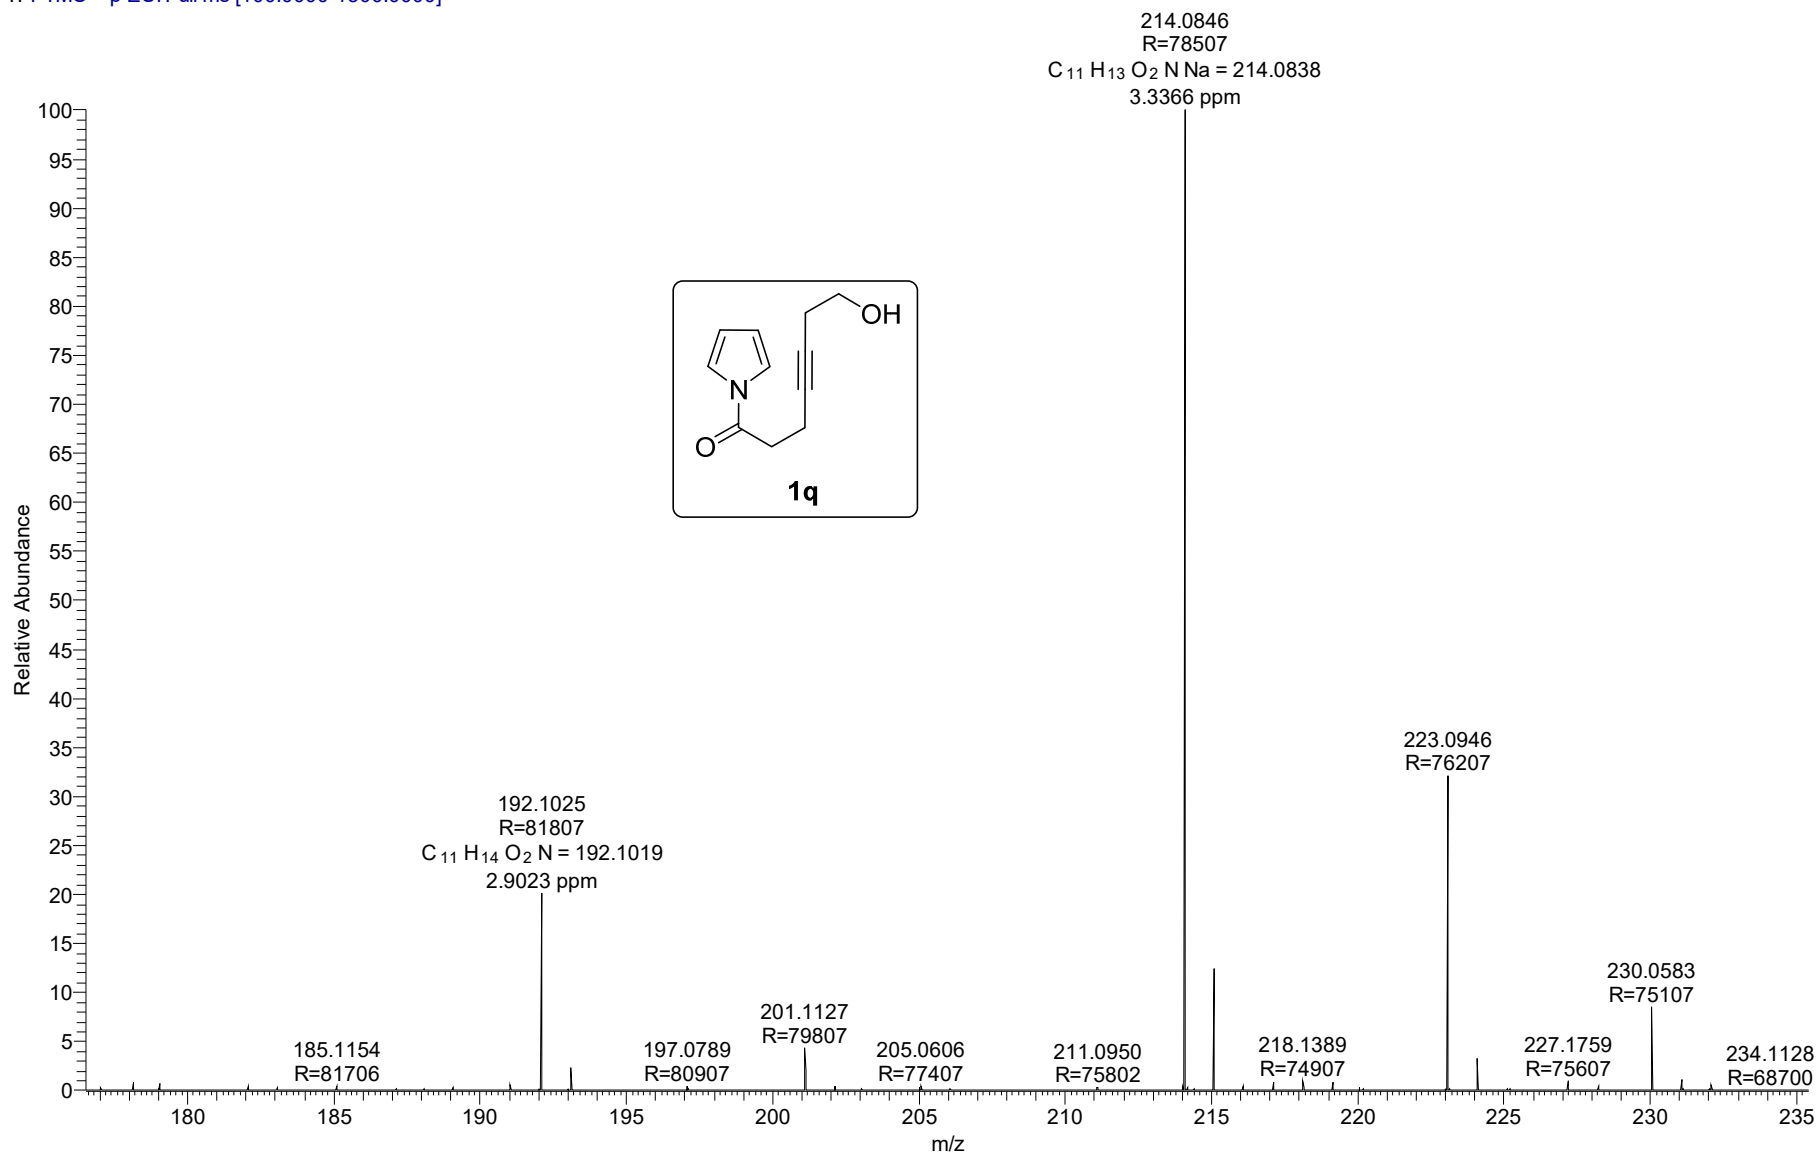

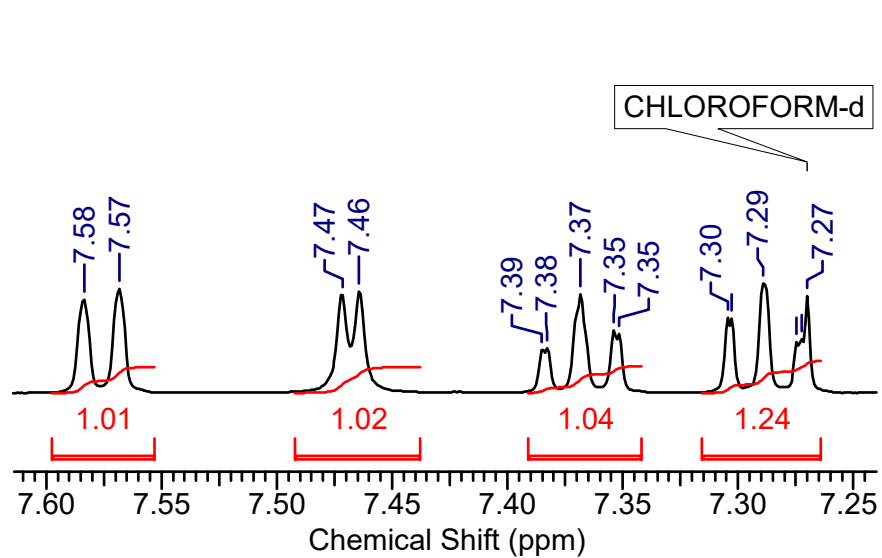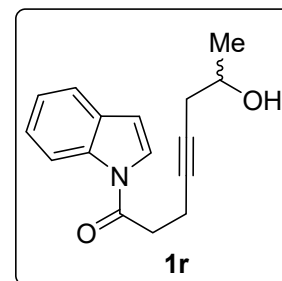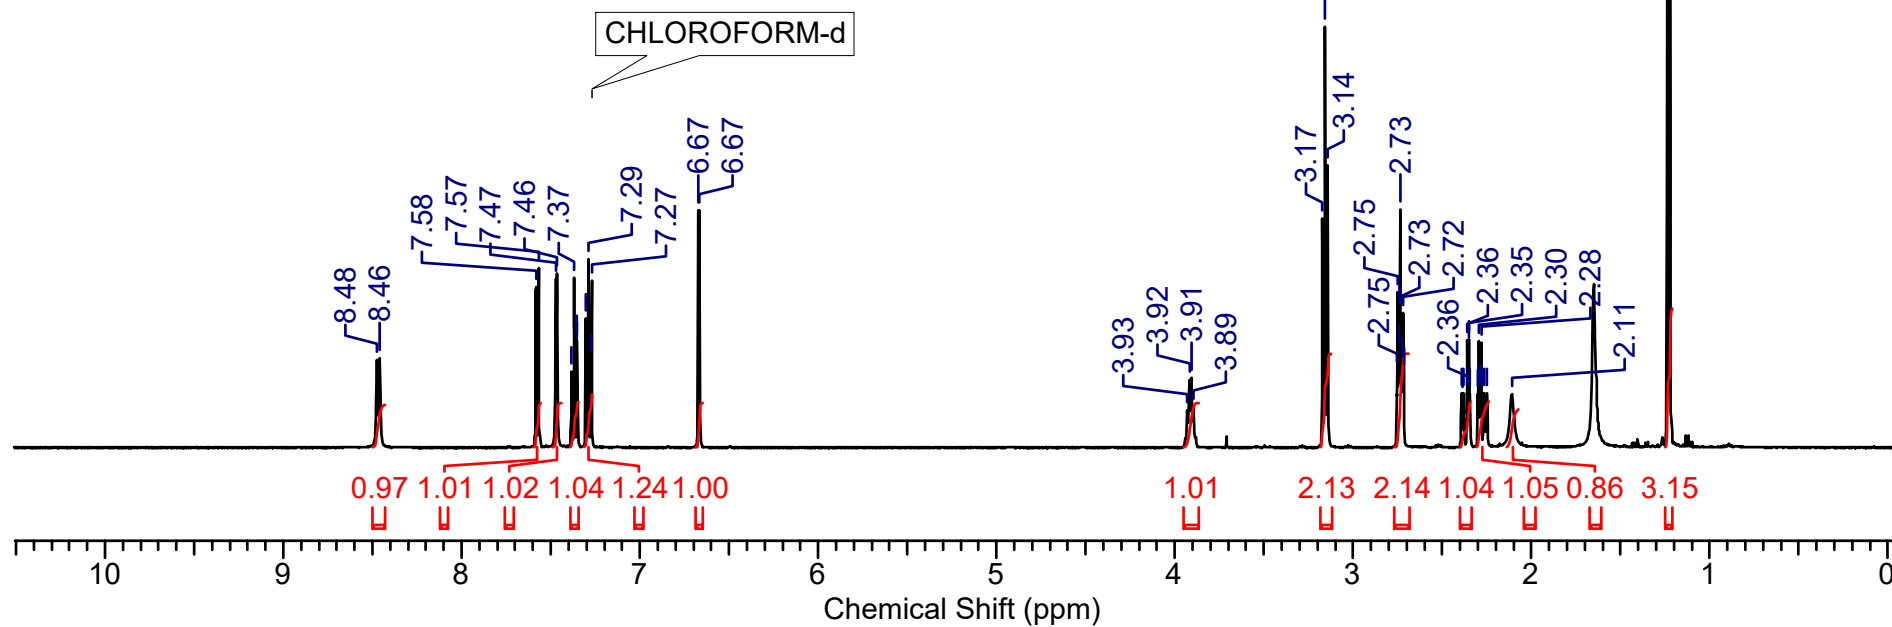



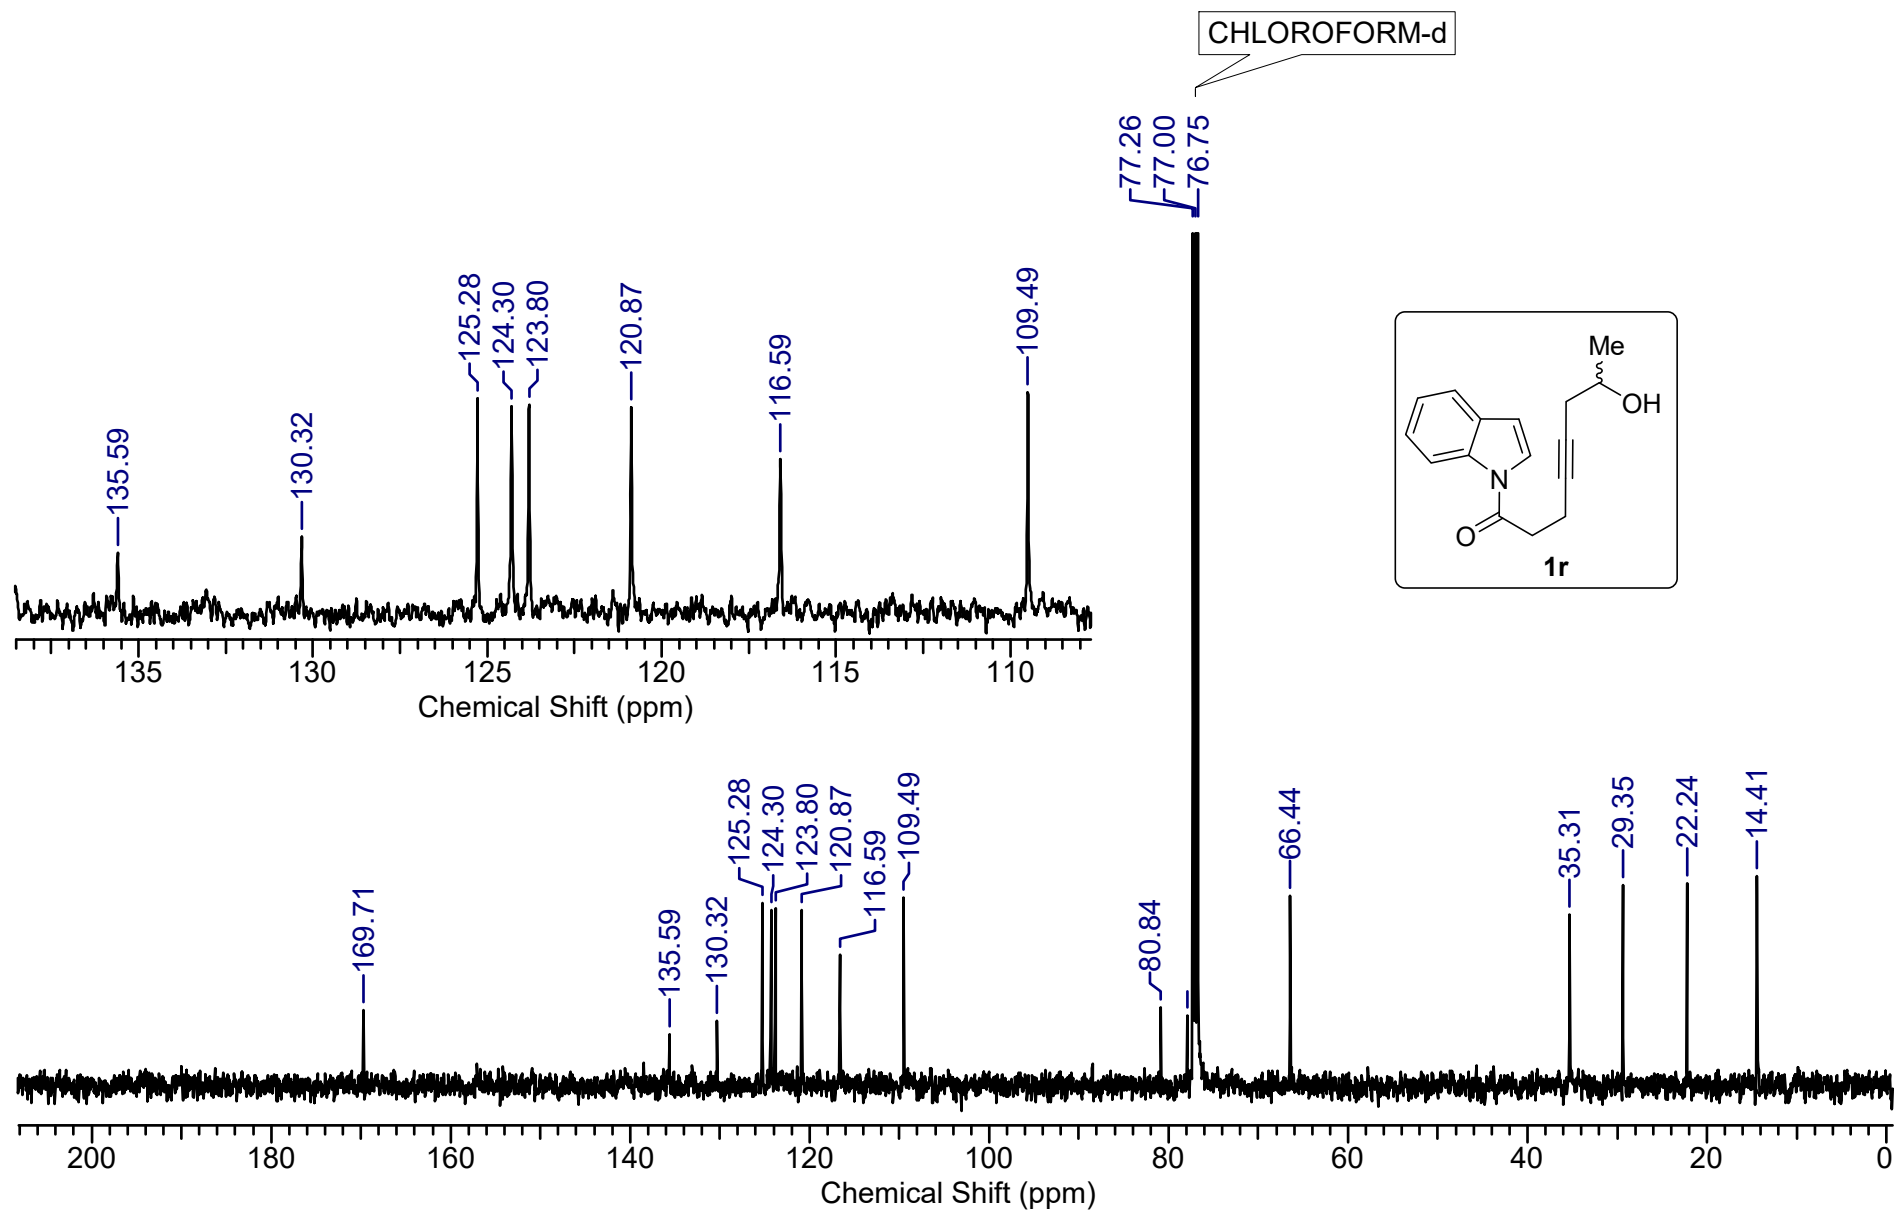

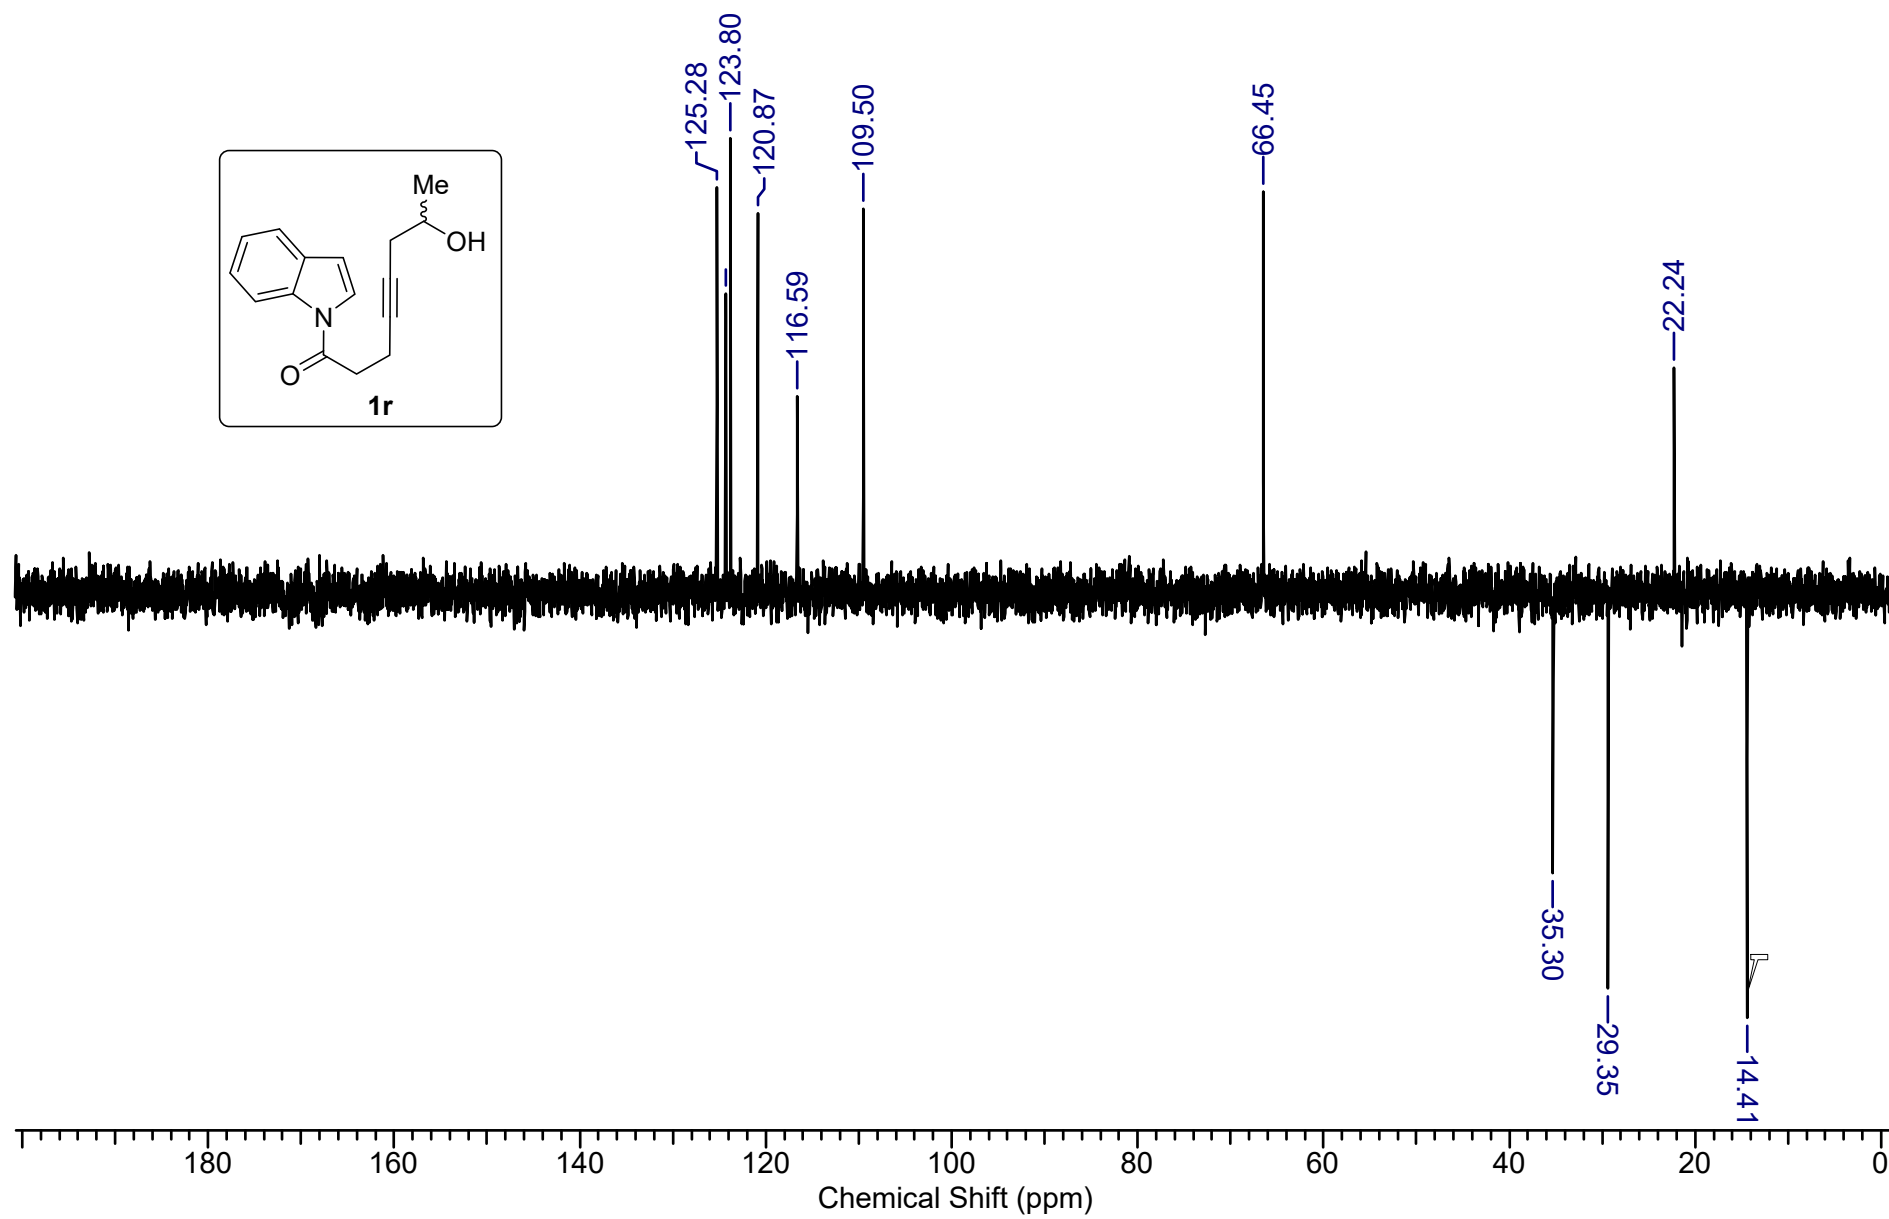

MSH-35 #272 RT: 1.49 AV: 1 NL: 1.40E9  
T: FTMS + p ESI Full ms [100.0000-1500.0000]

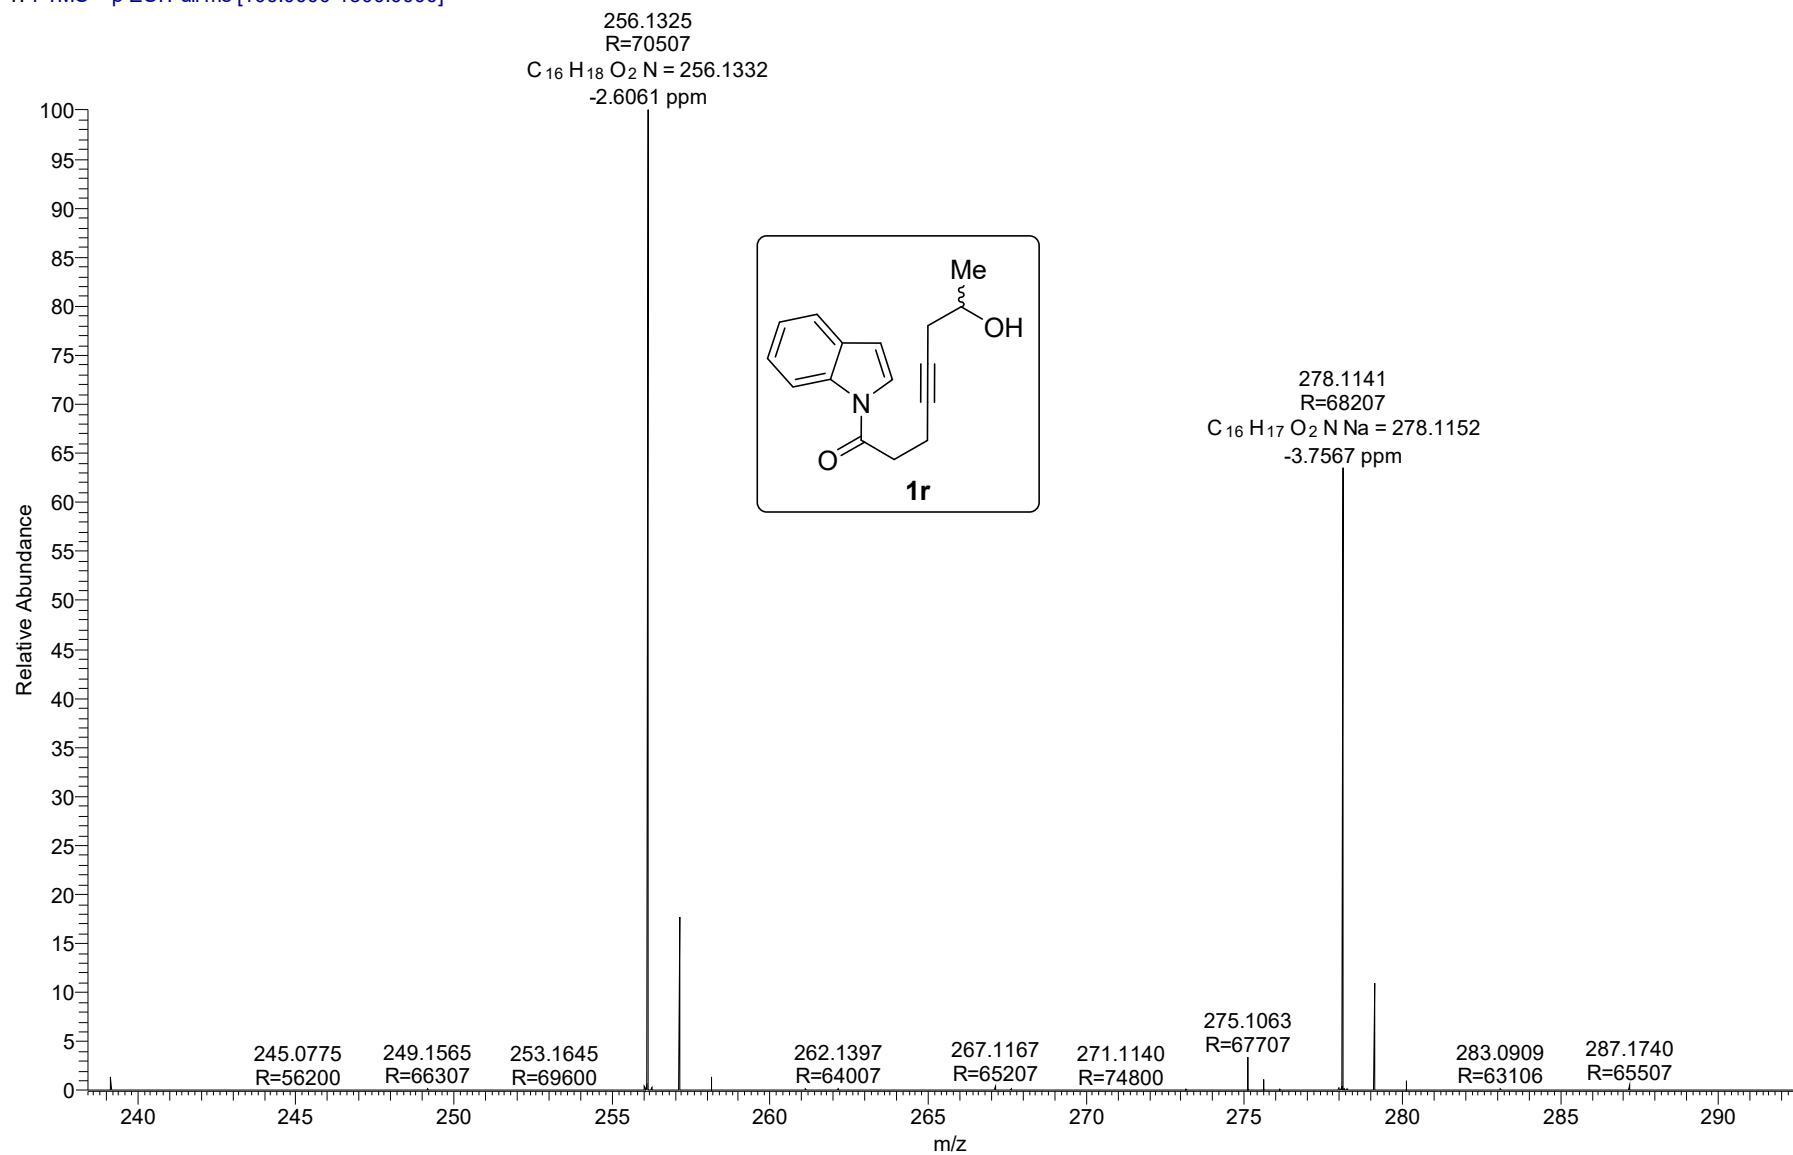

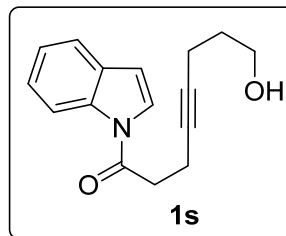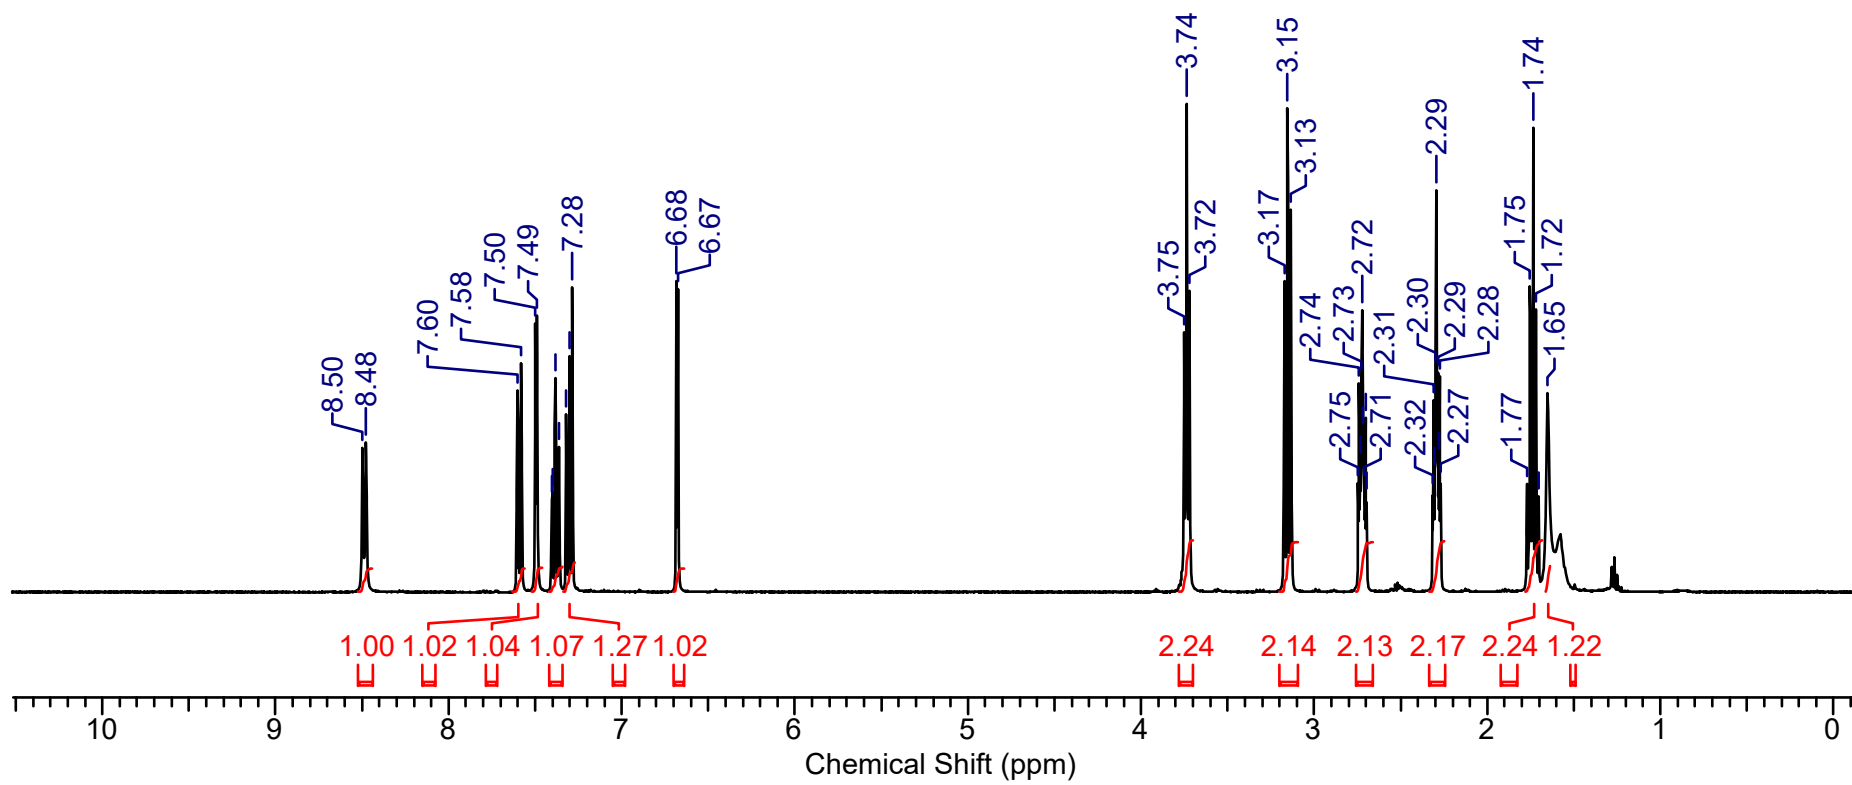

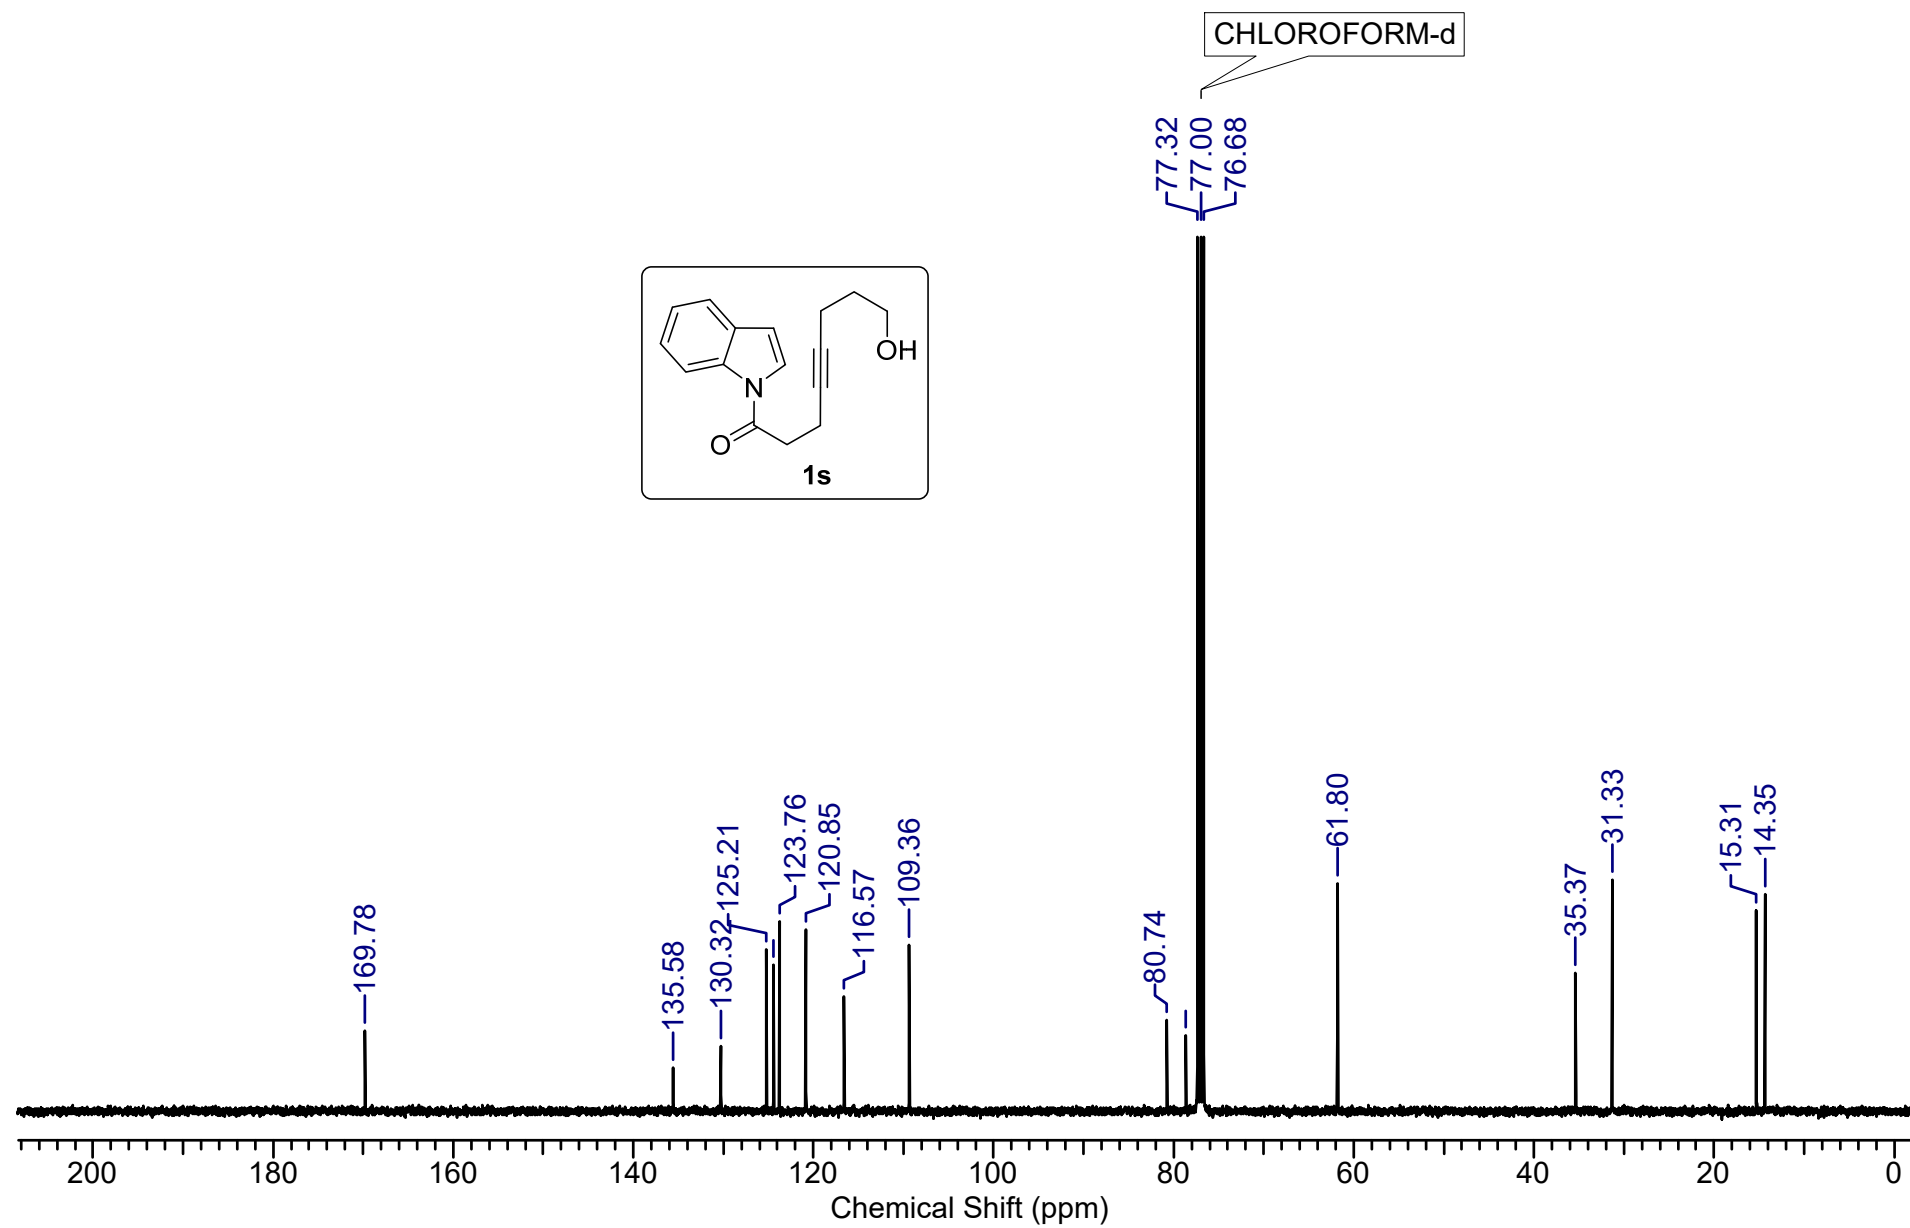

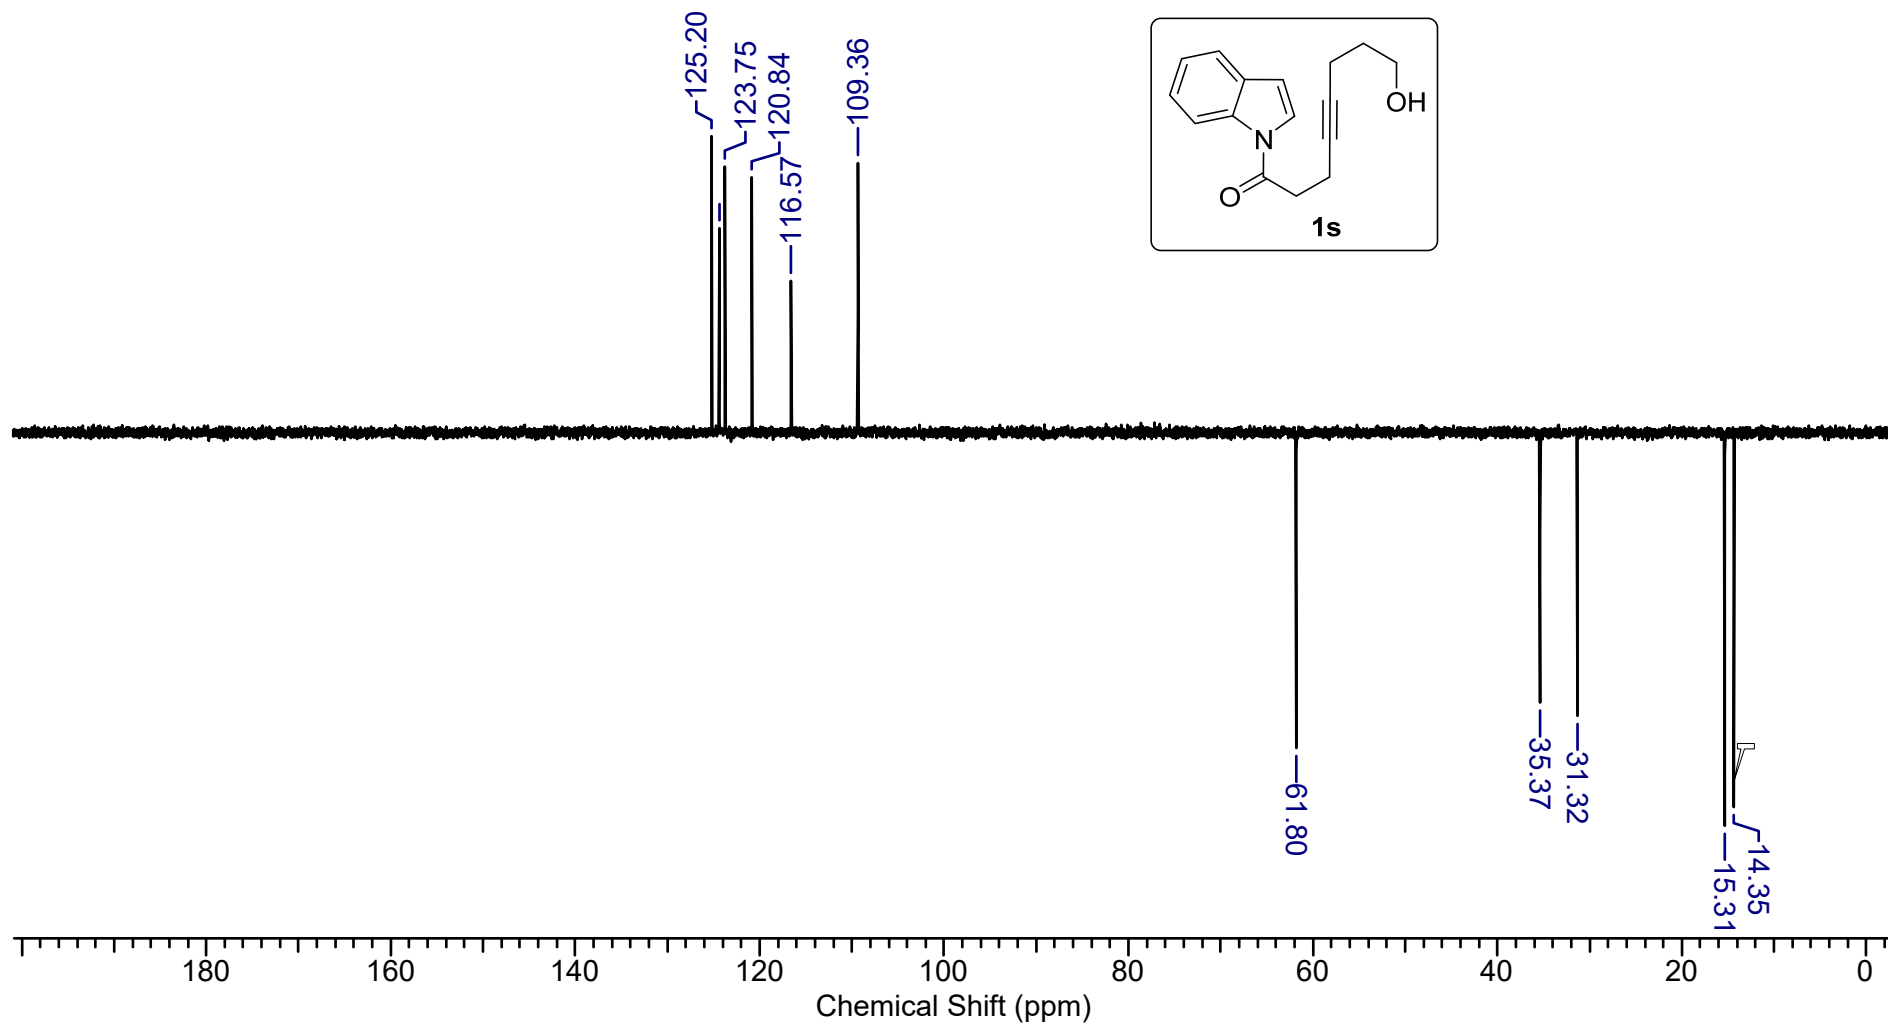

MSH-34 #265 RT: 1.45 AV: 1 NL: 3.27E8  
T: FTMS + p ESI Full ms [100.0000-1500.0000]

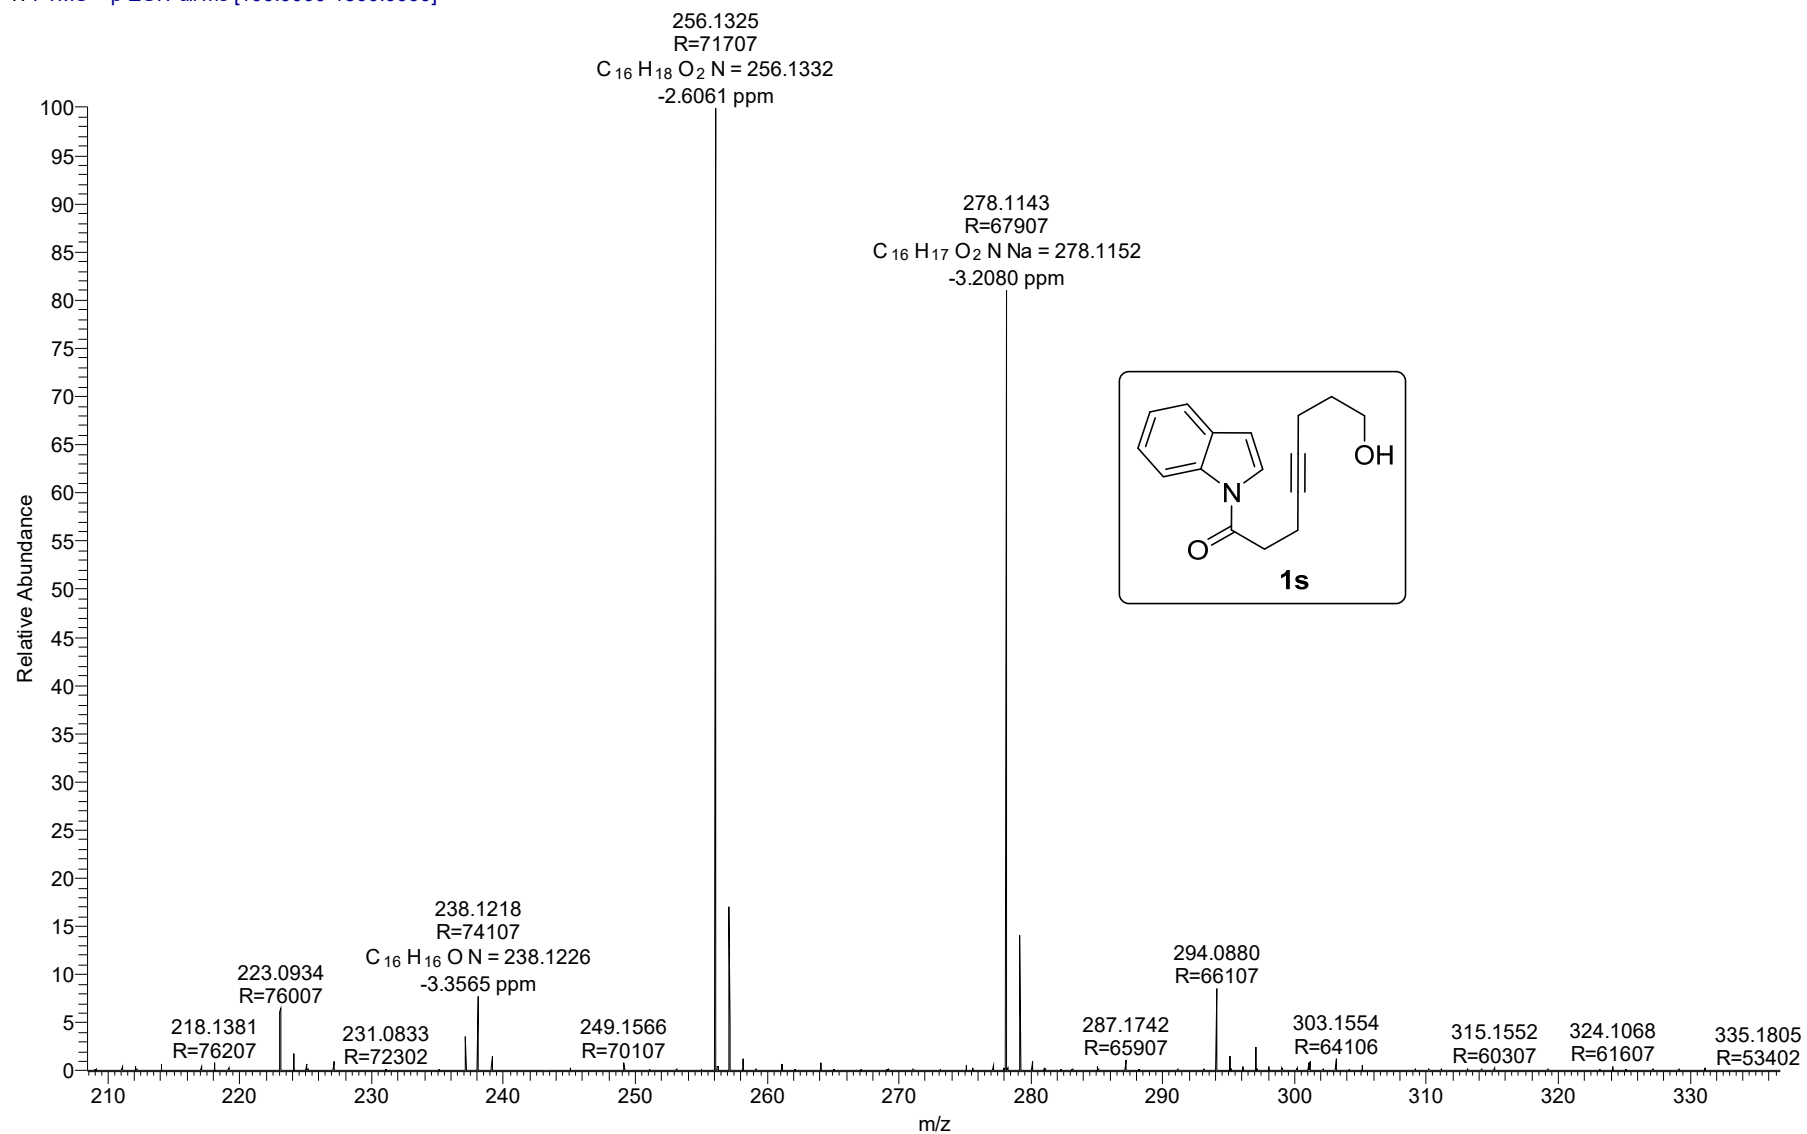

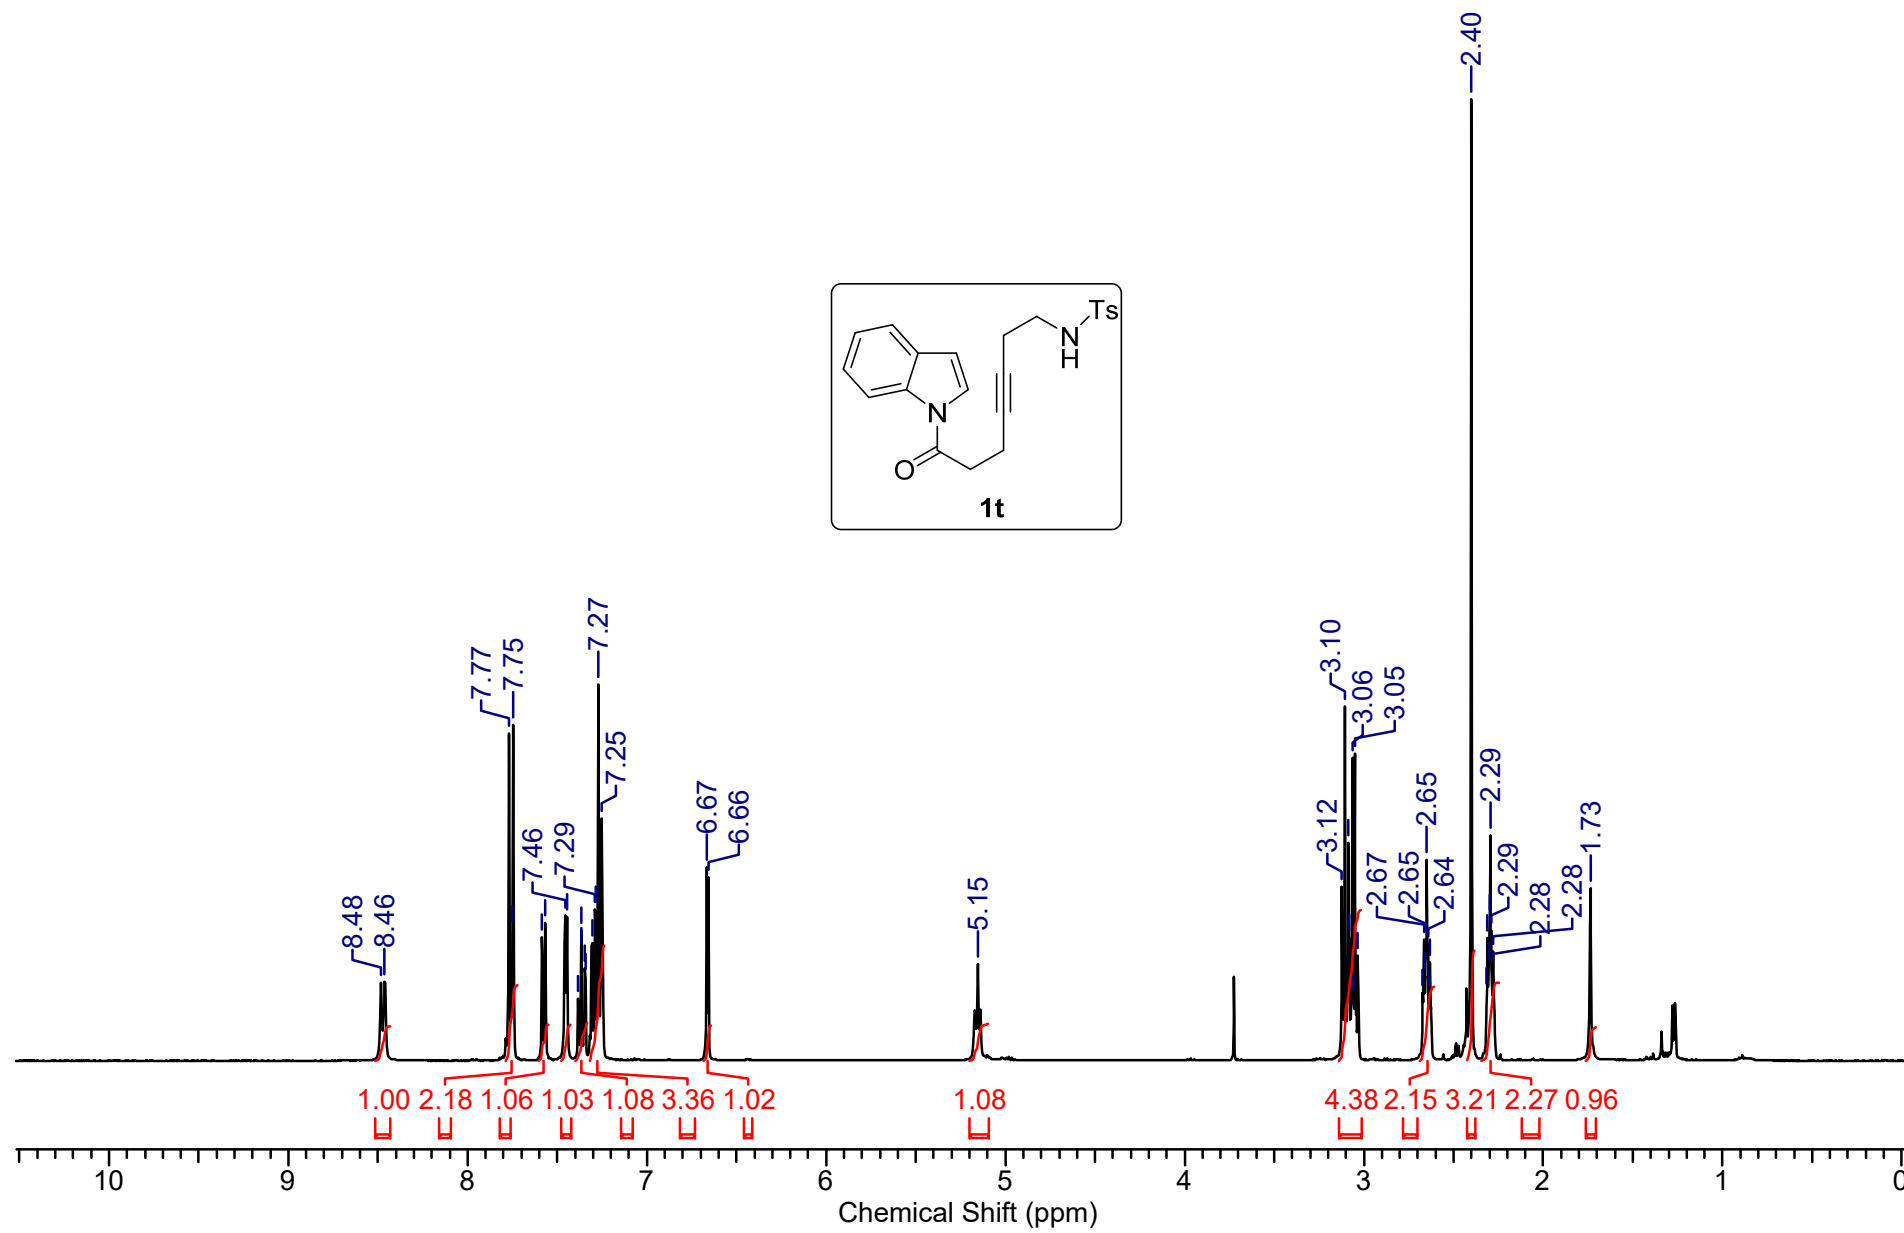



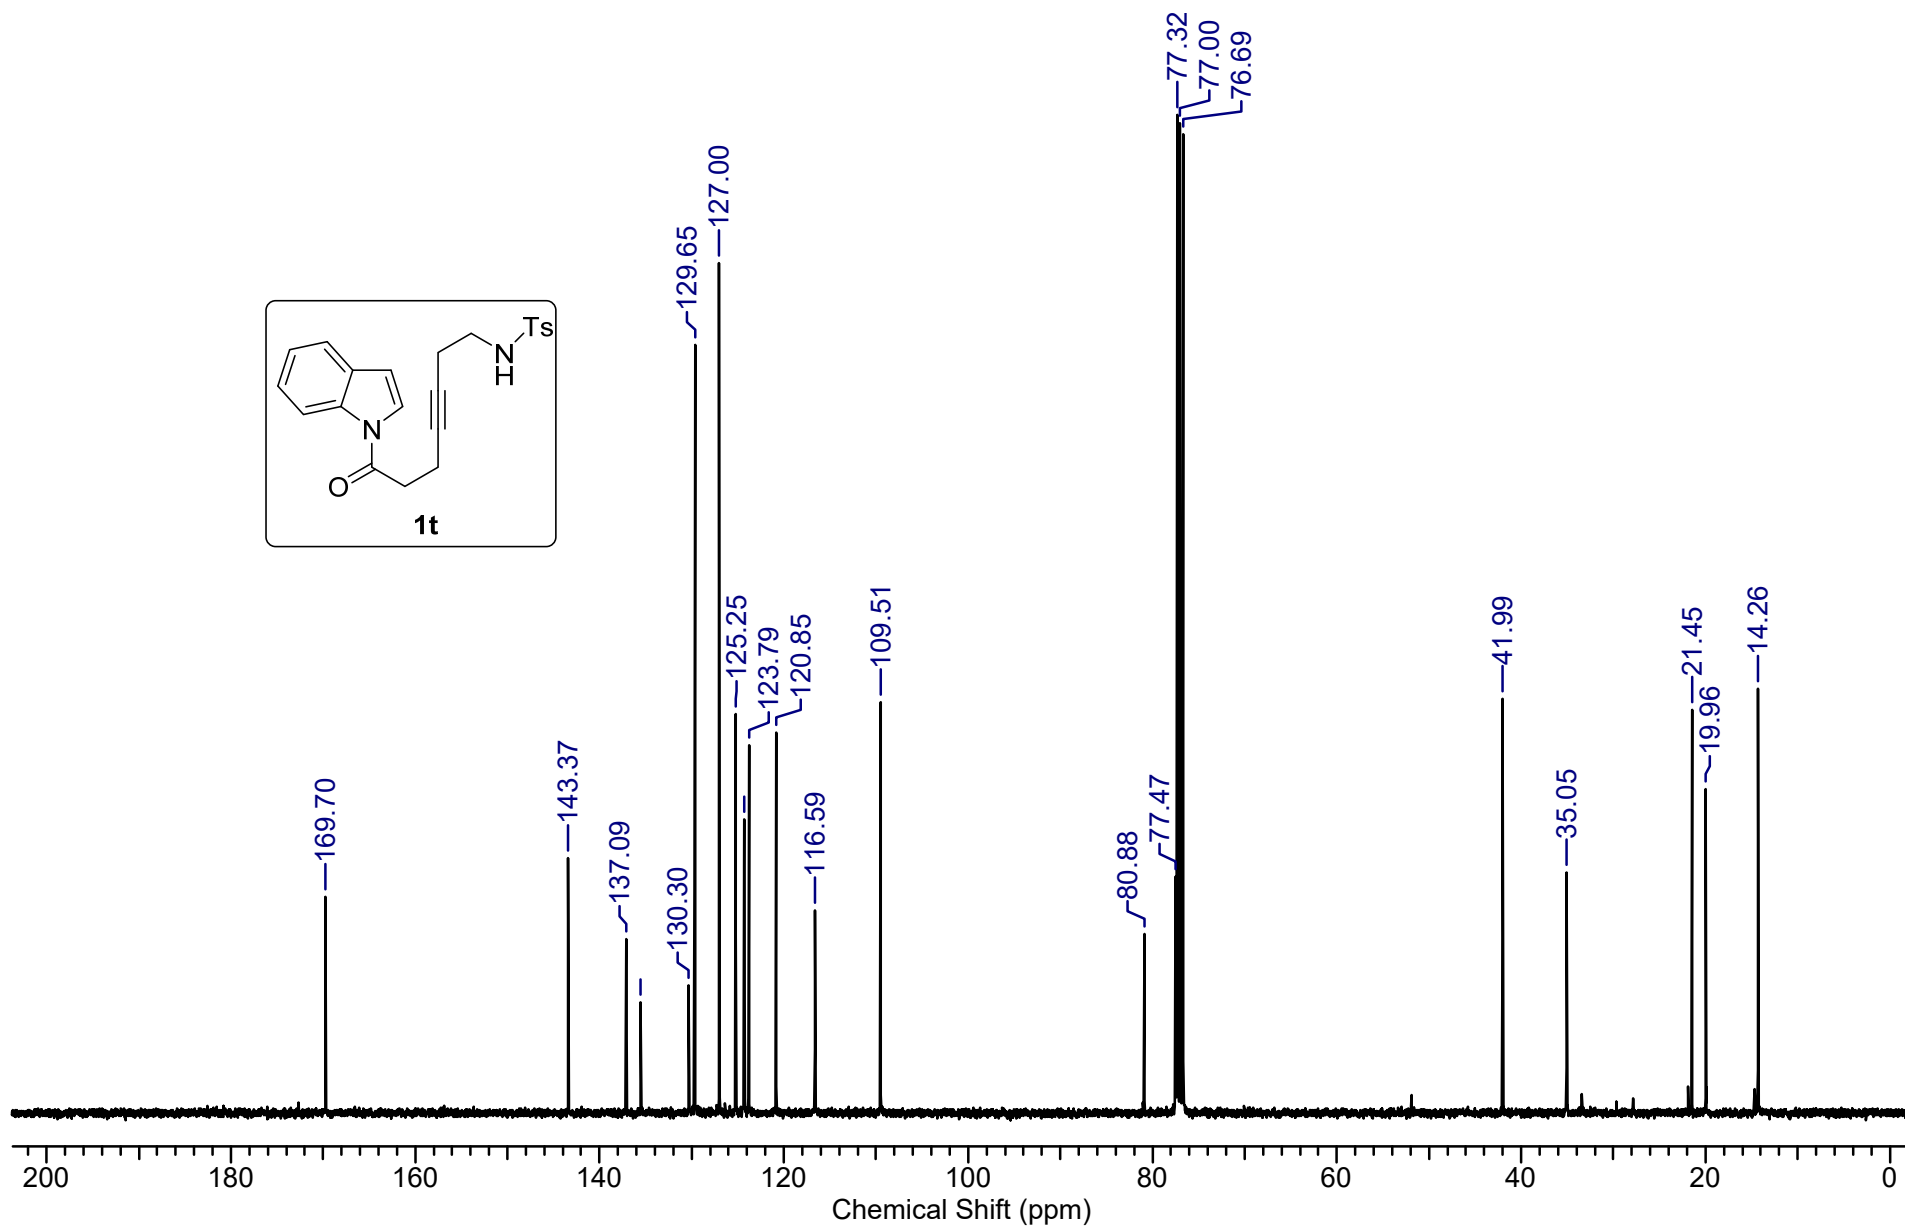

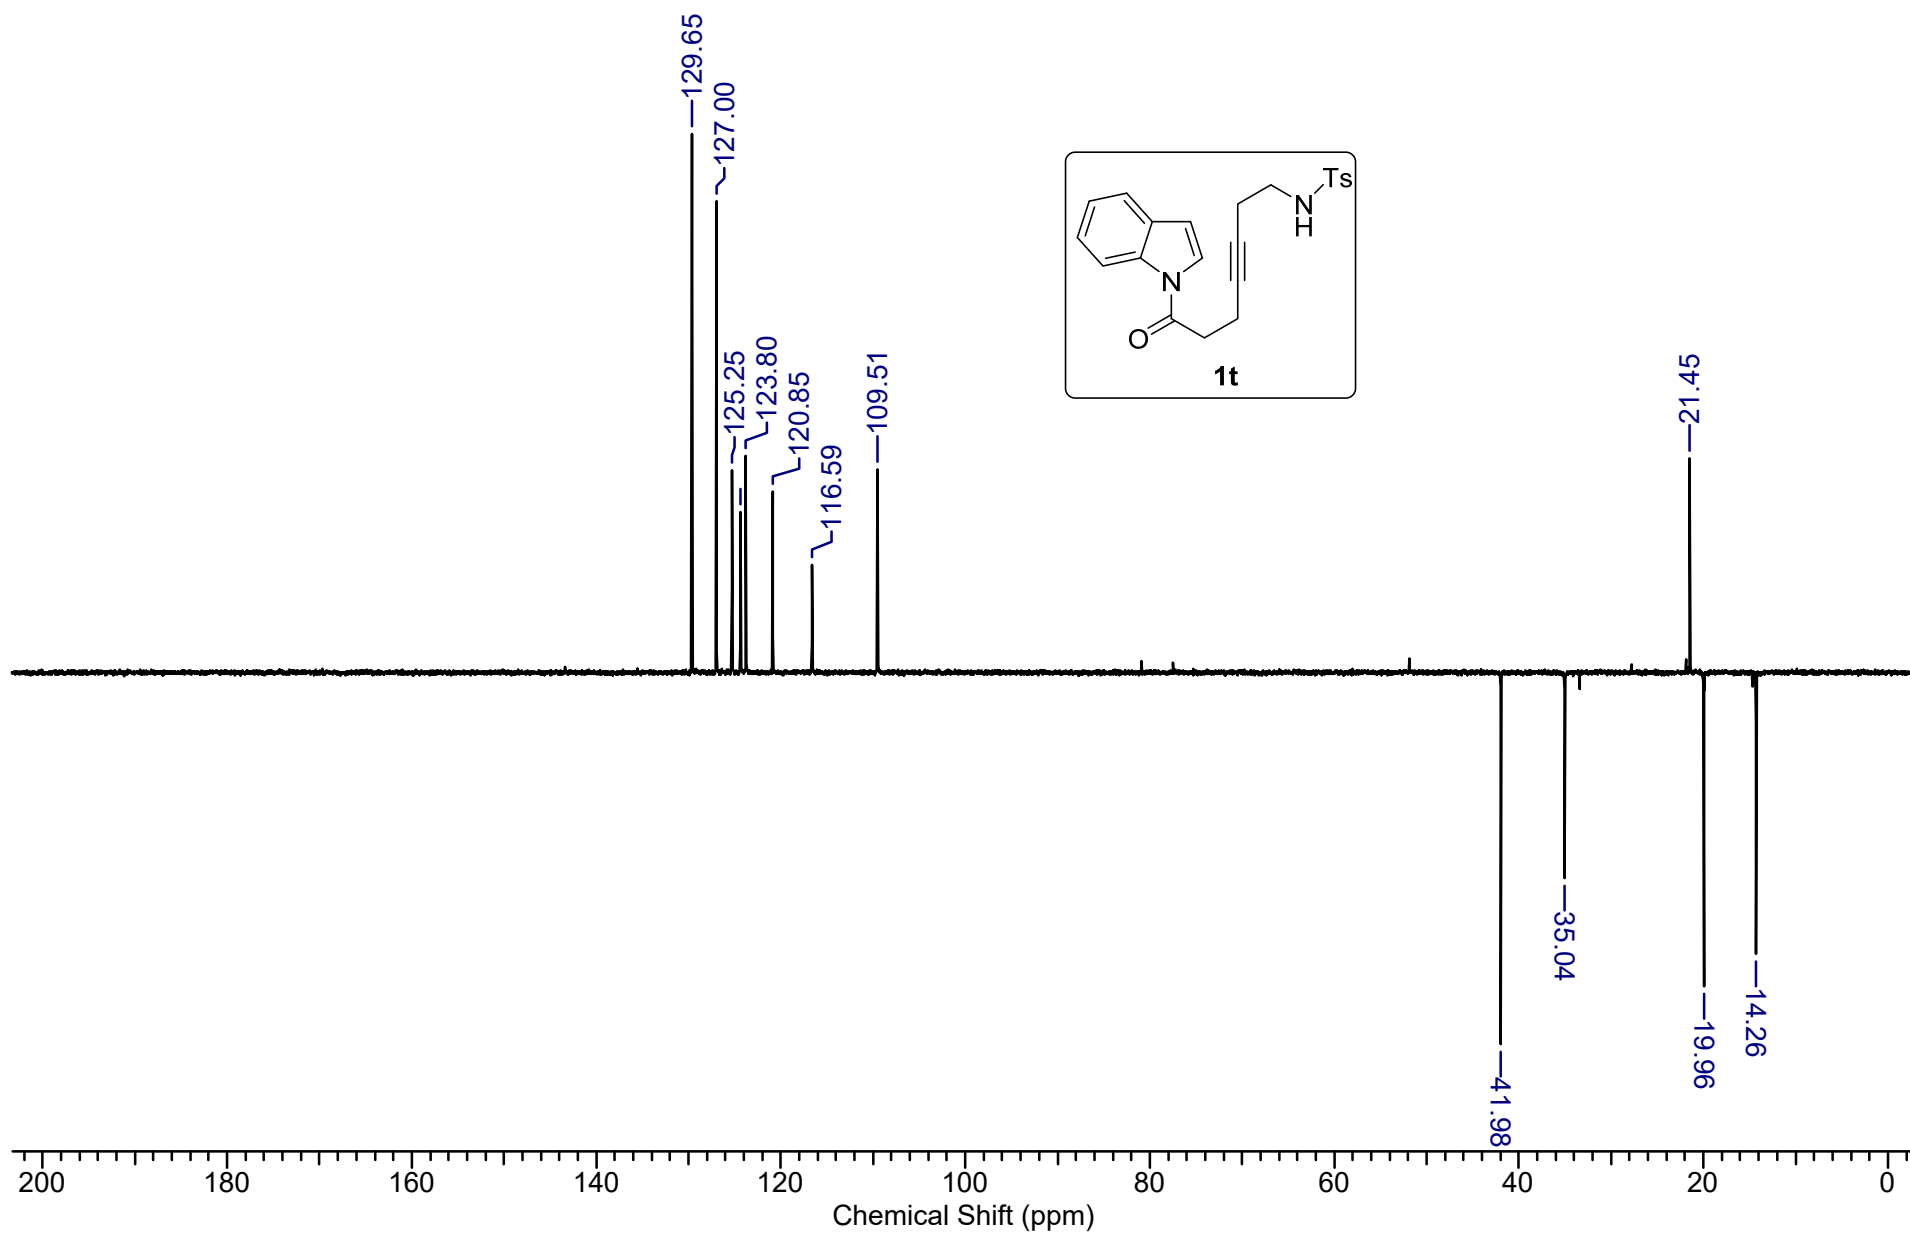

MS-12 #266 RT: 1.42 AV: 1 NL: 5.96E7  
T: FTMS + p ESI Full ms [100.0000-1500.0000]

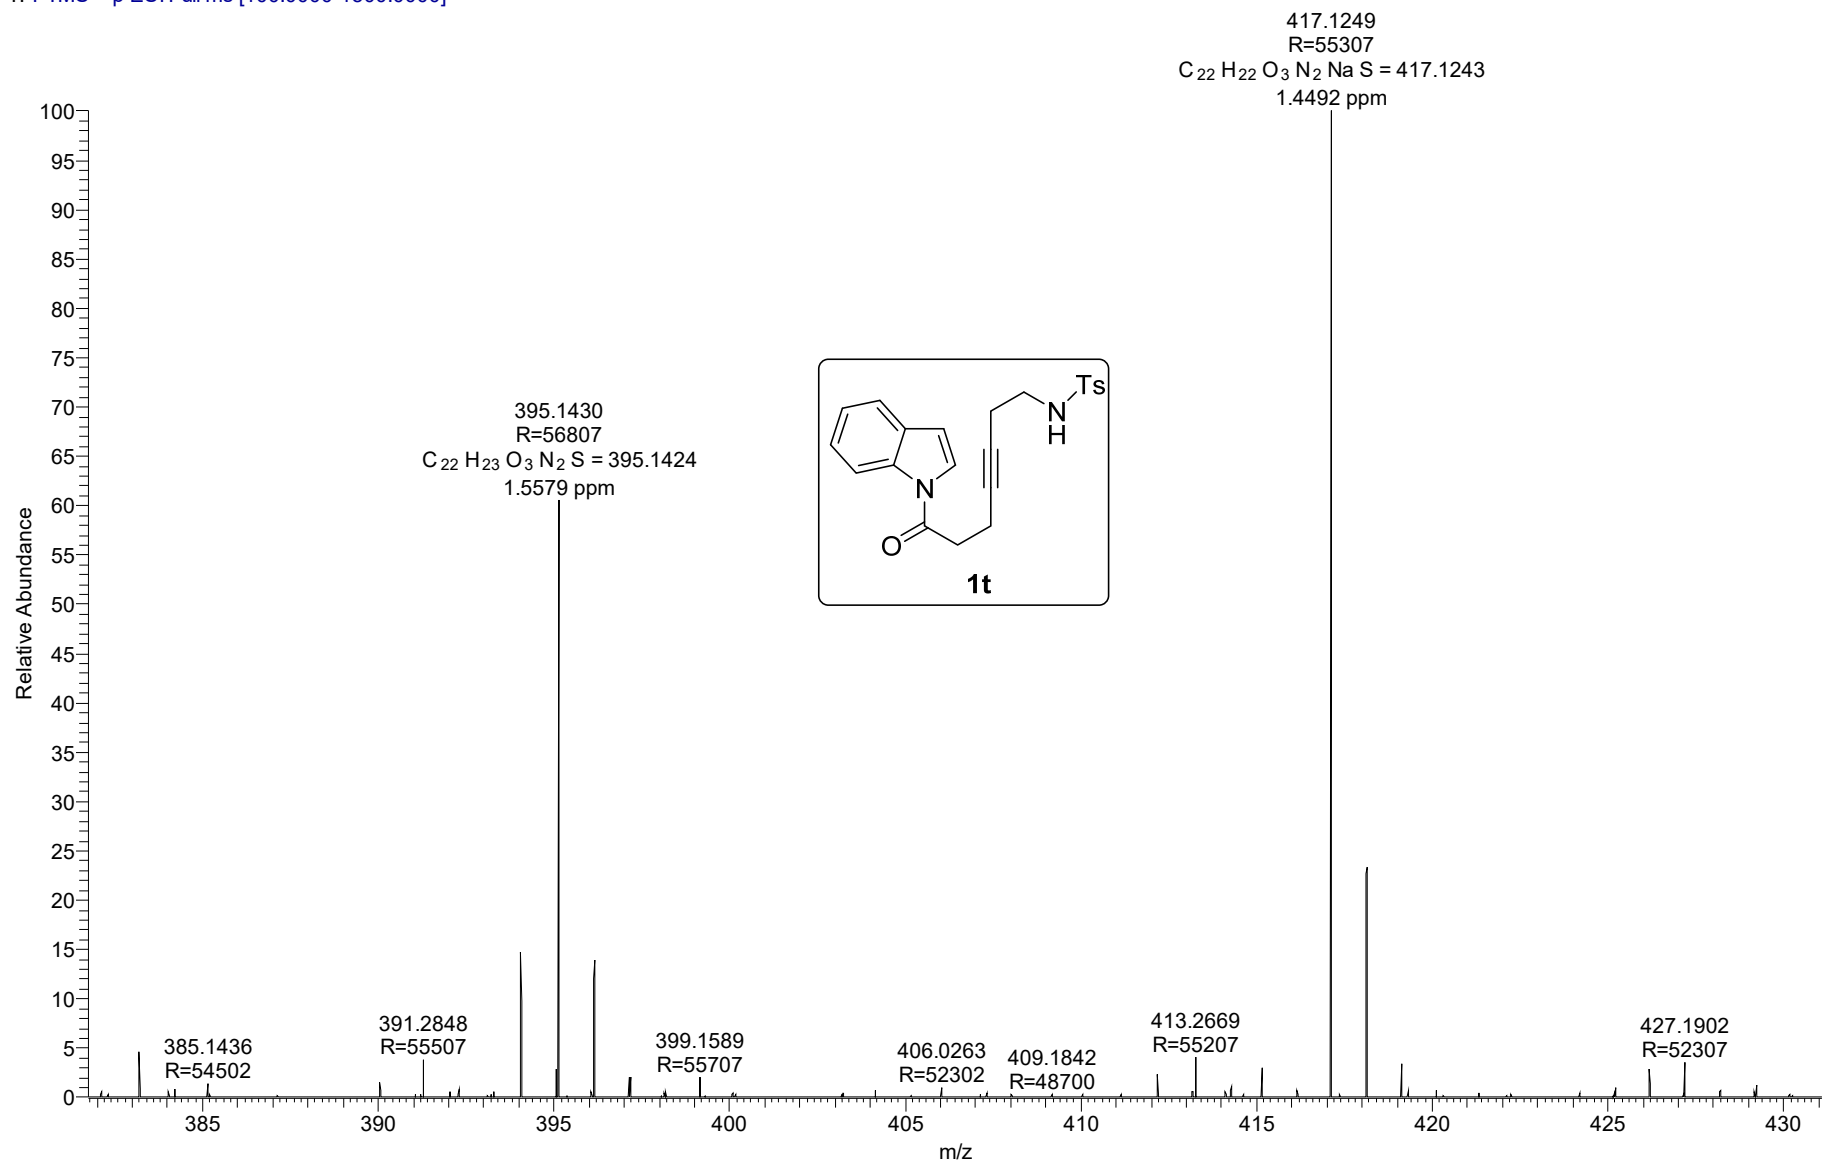

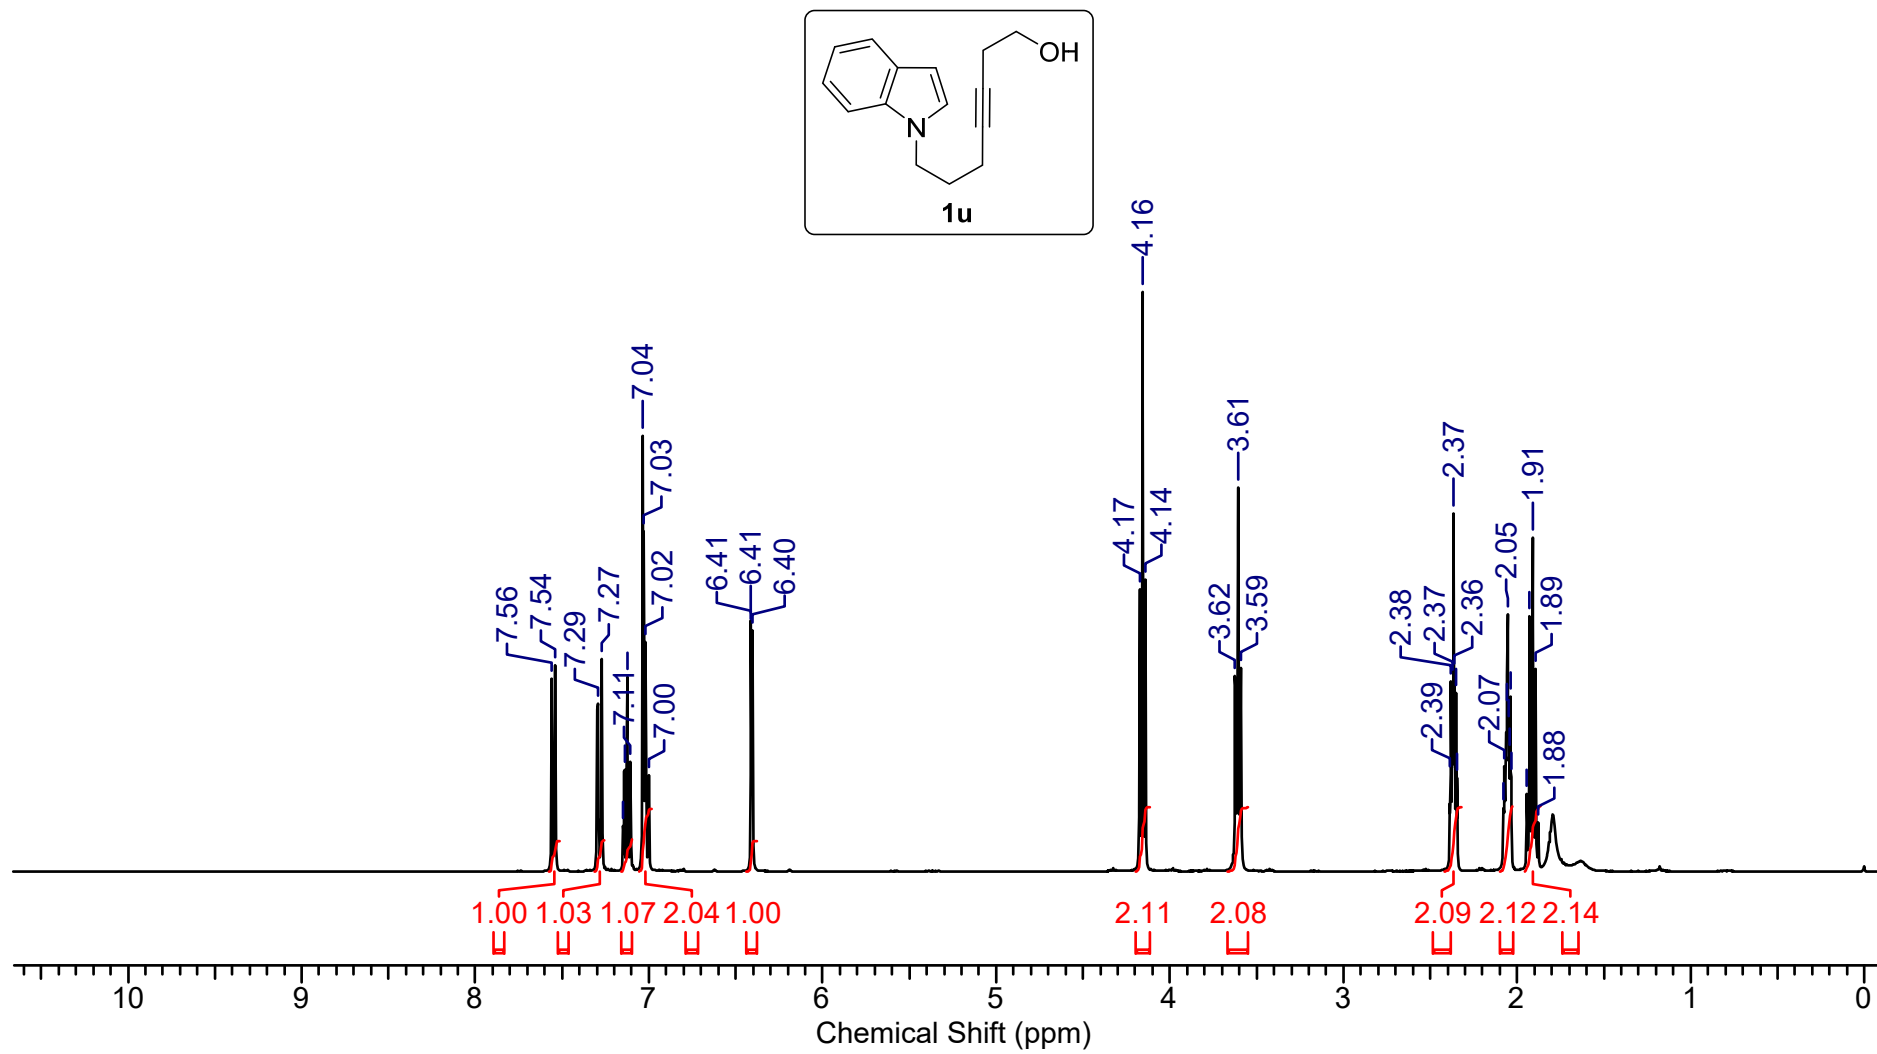

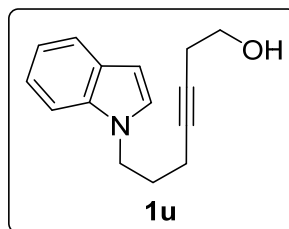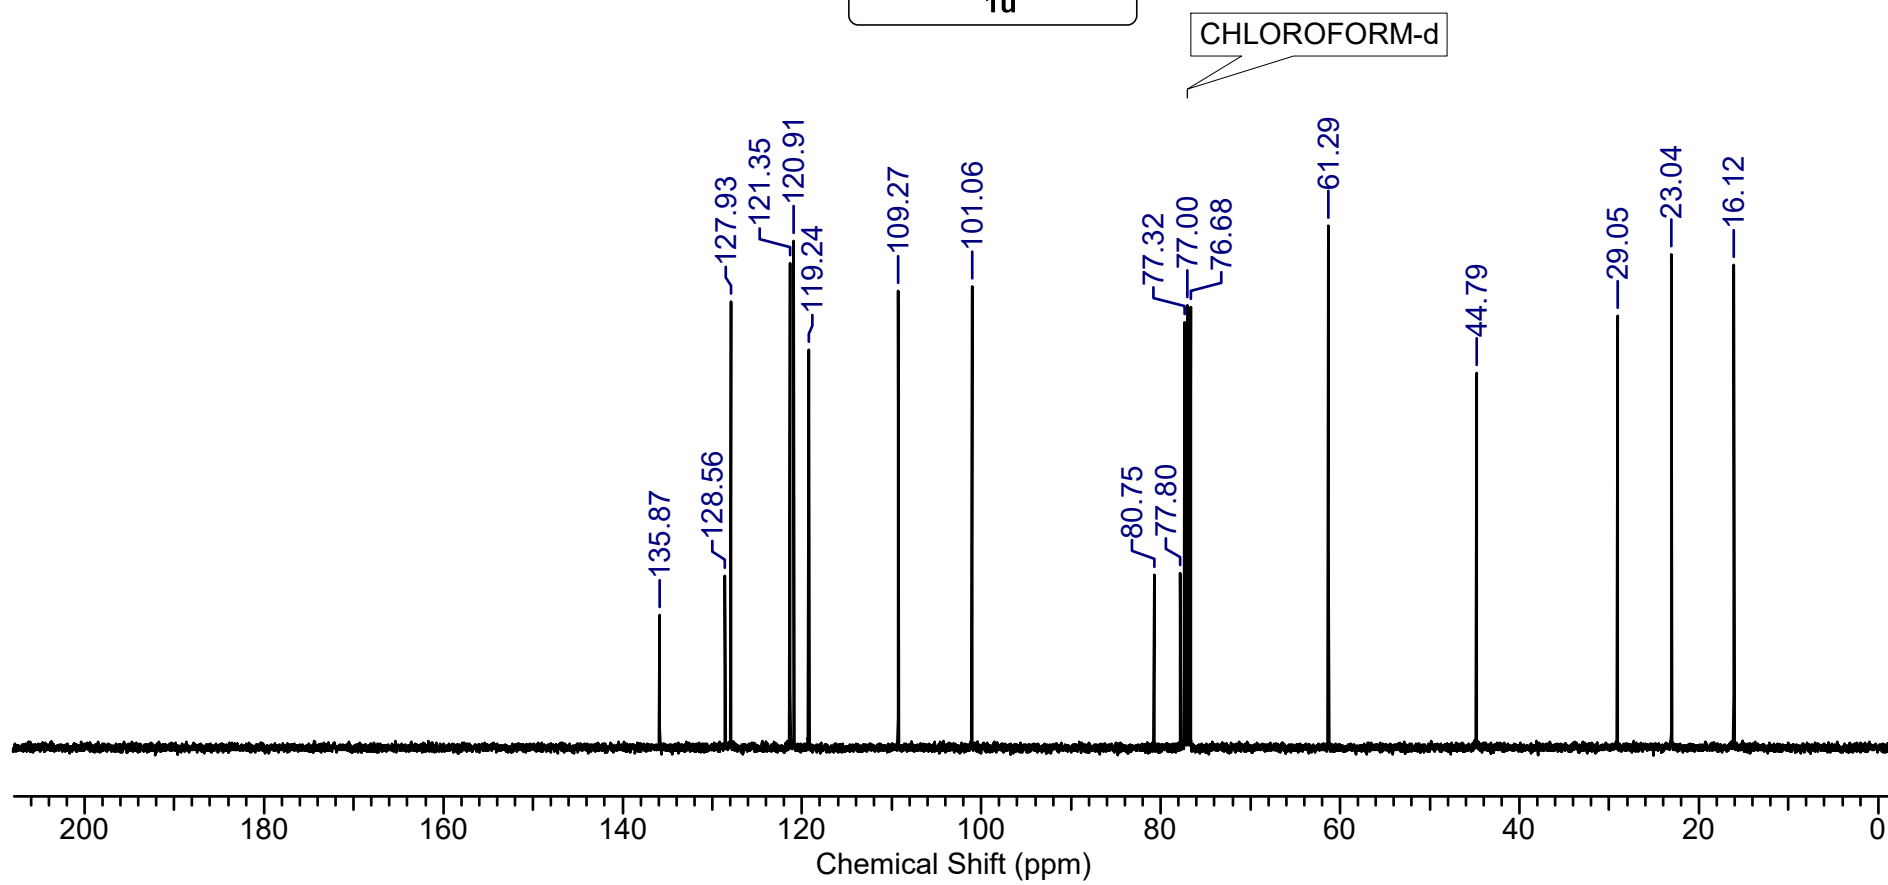

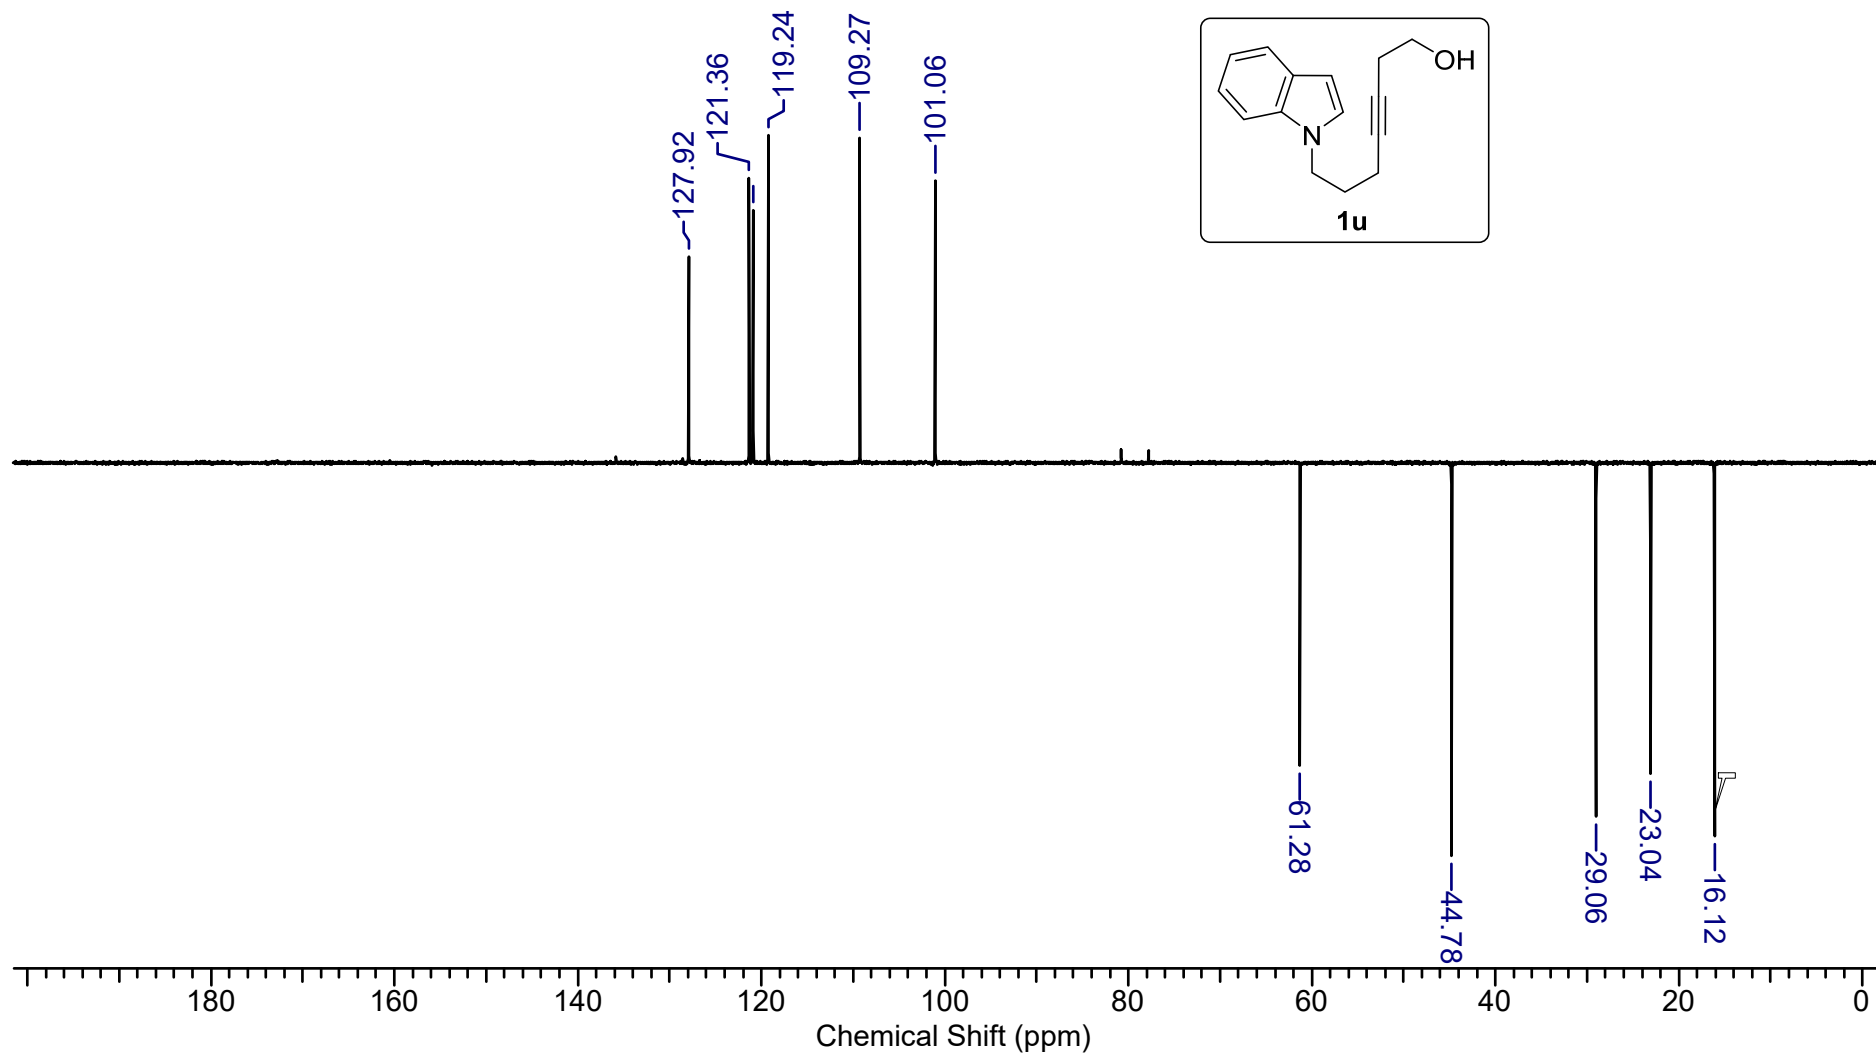

MS-13 #277 RT: 1.48 AV: 1 NL: 1.16E8  
T: FTMS + p ESI Full ms [100.0000-1500.0000]

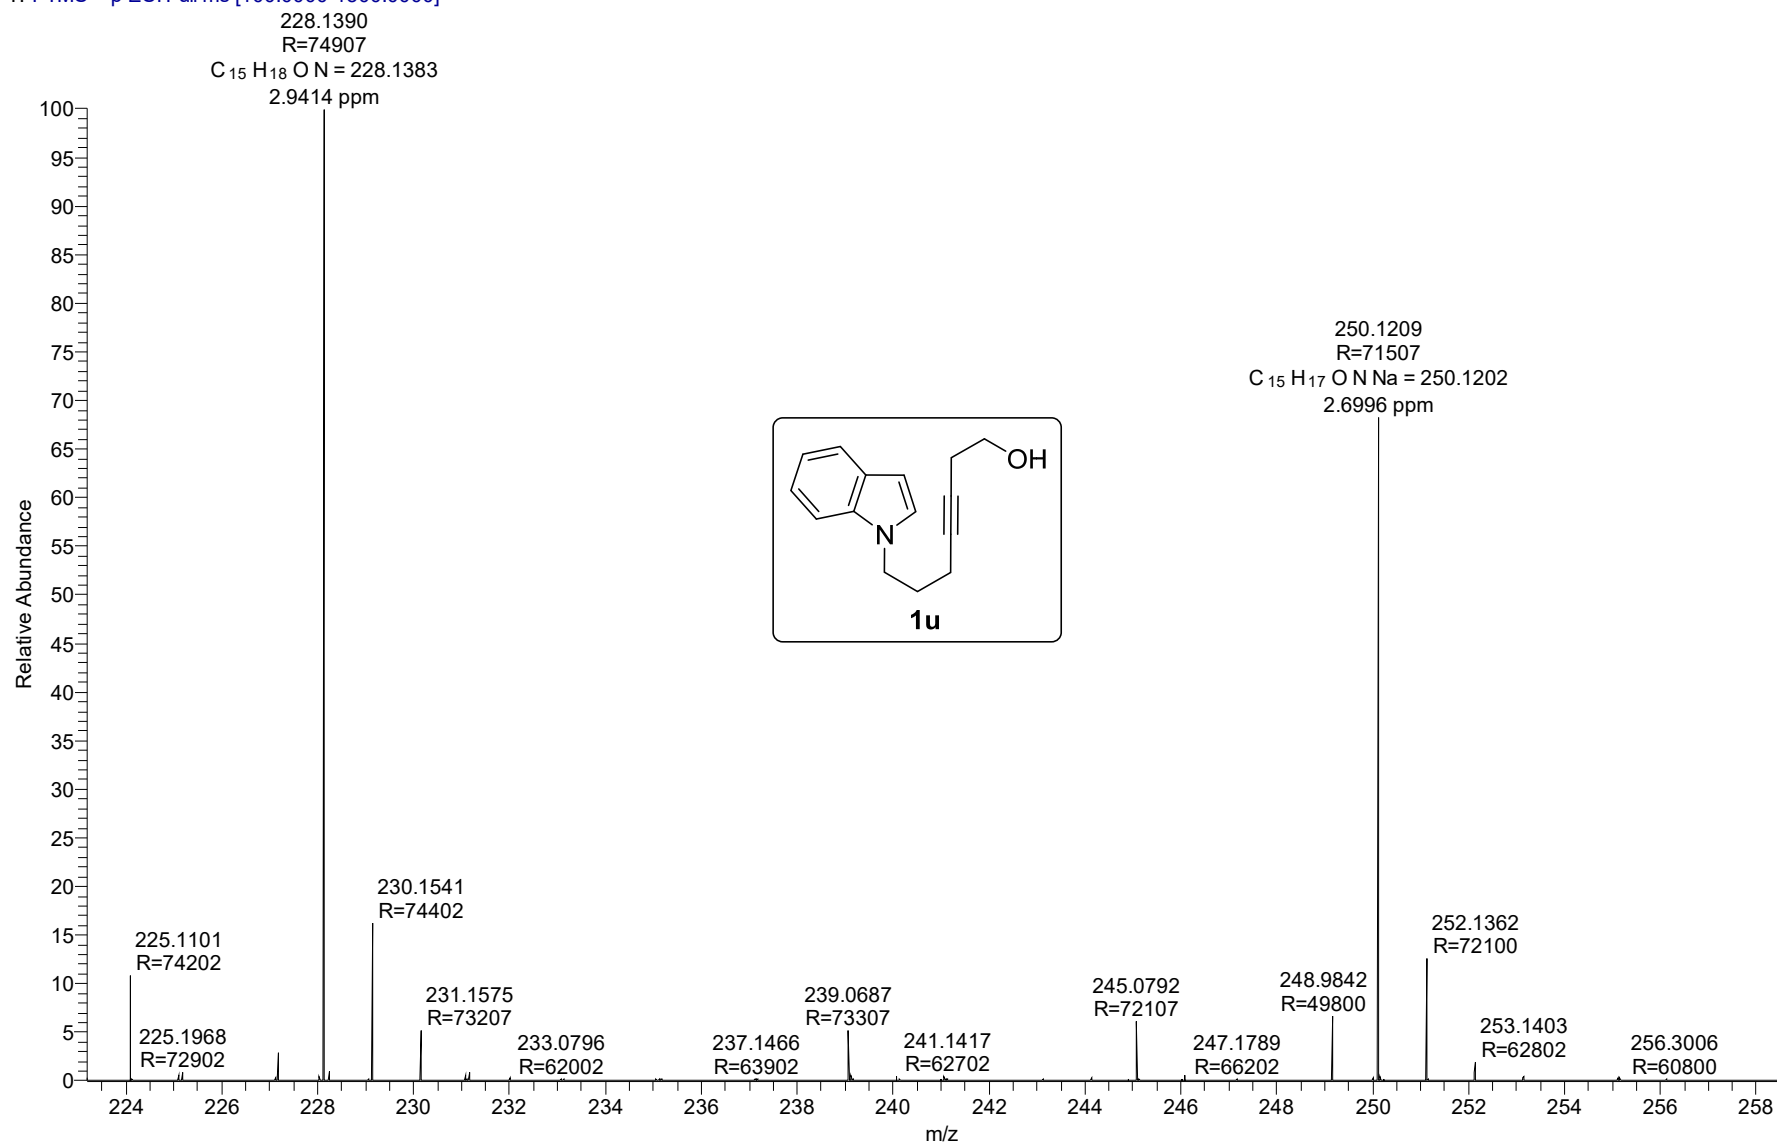

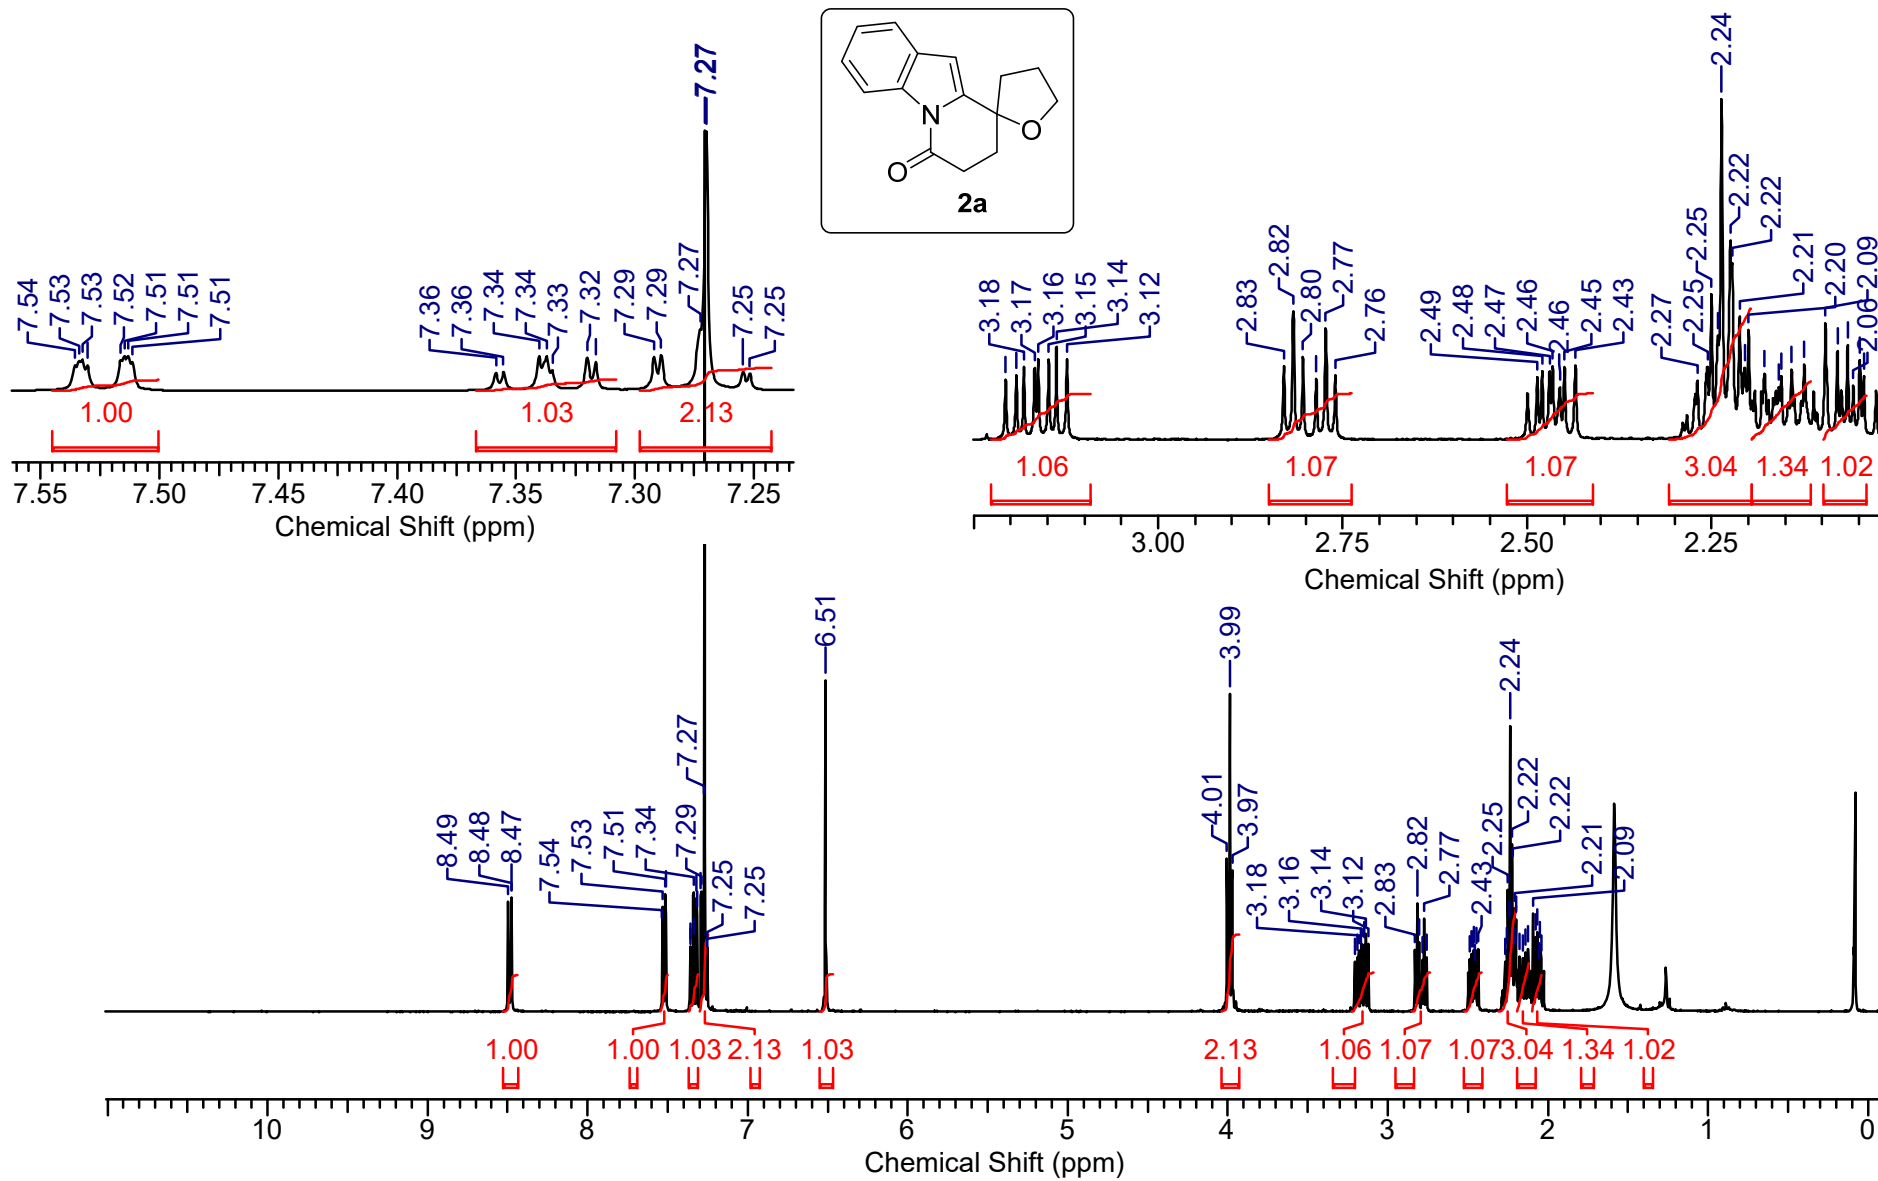



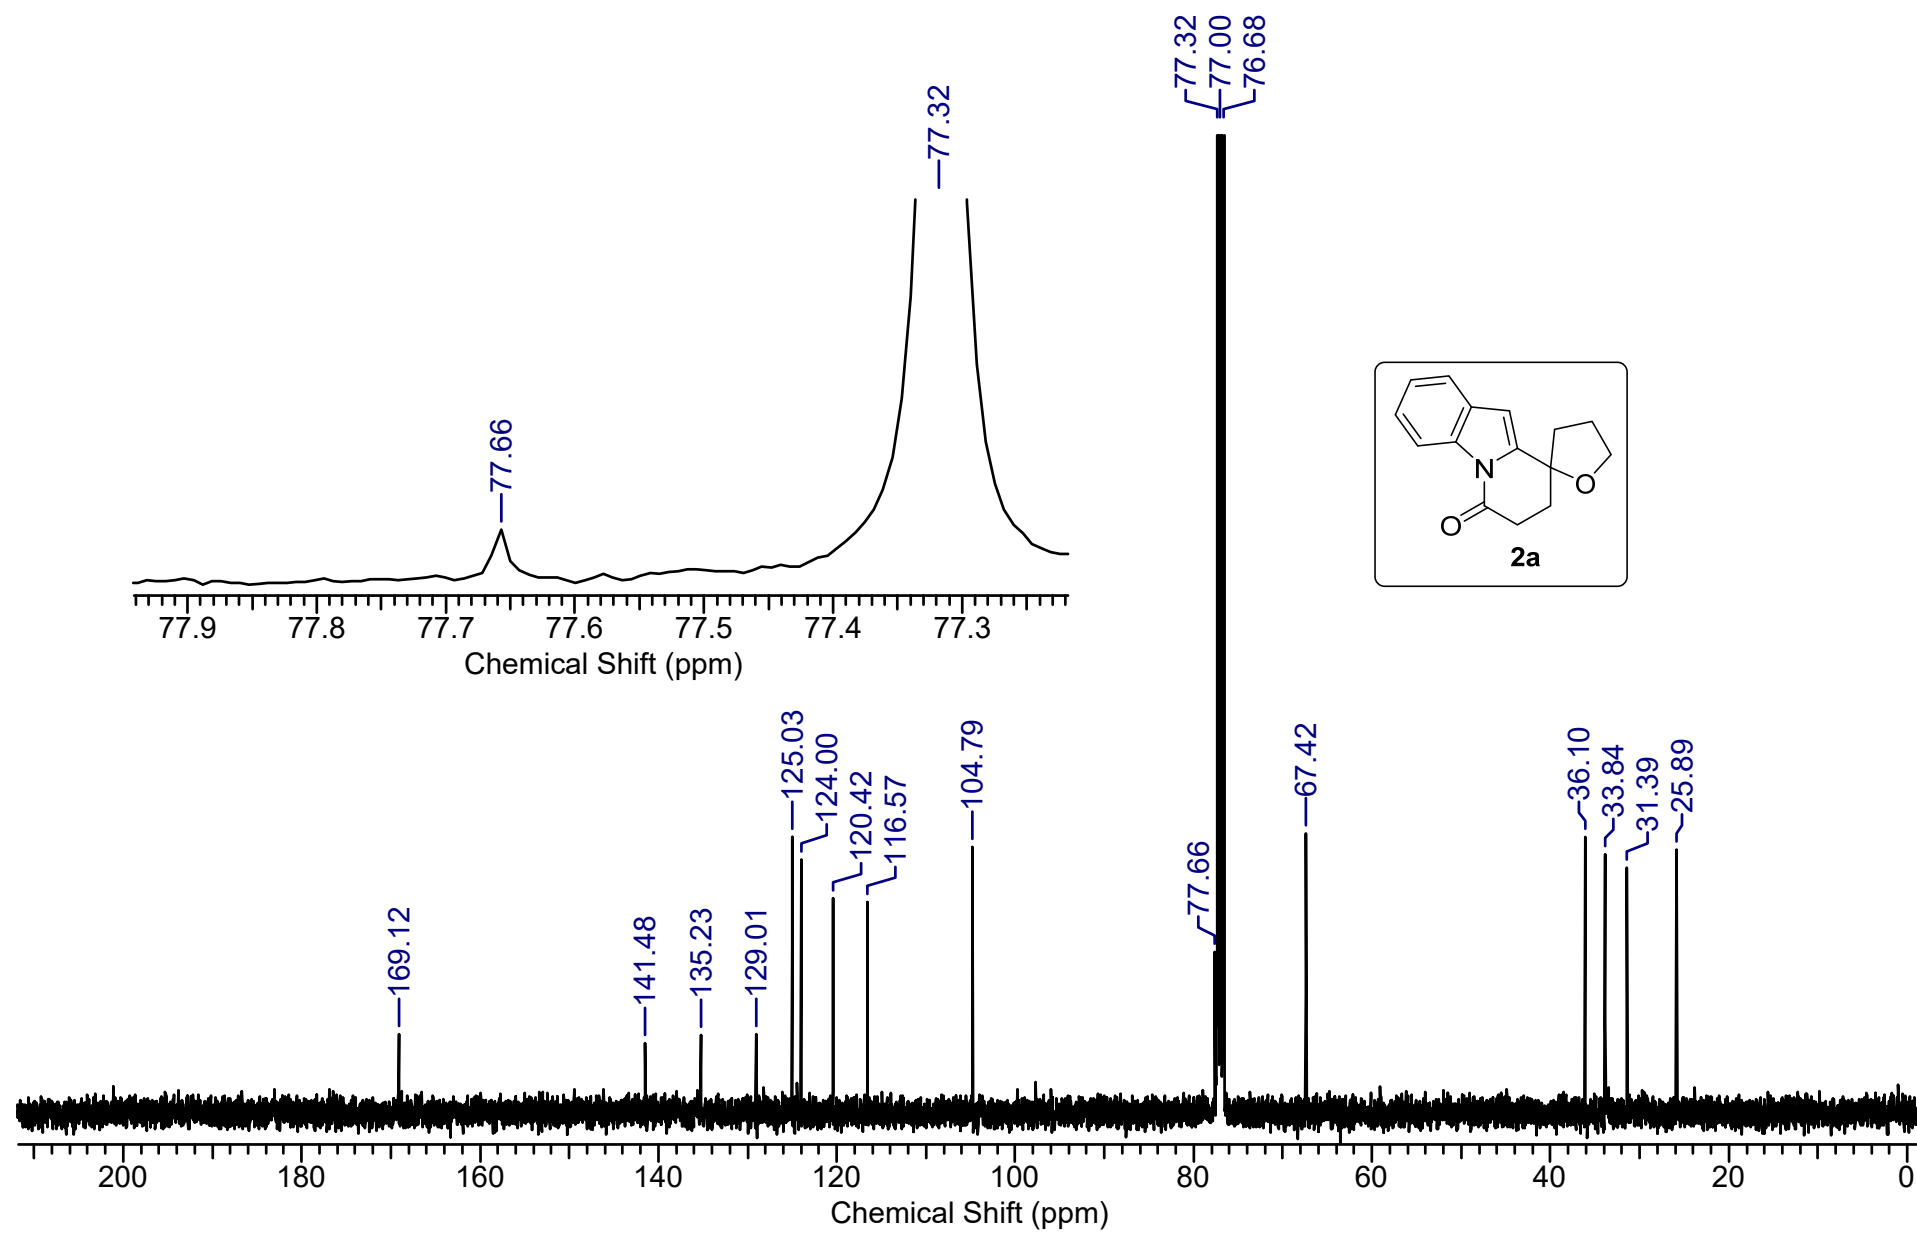

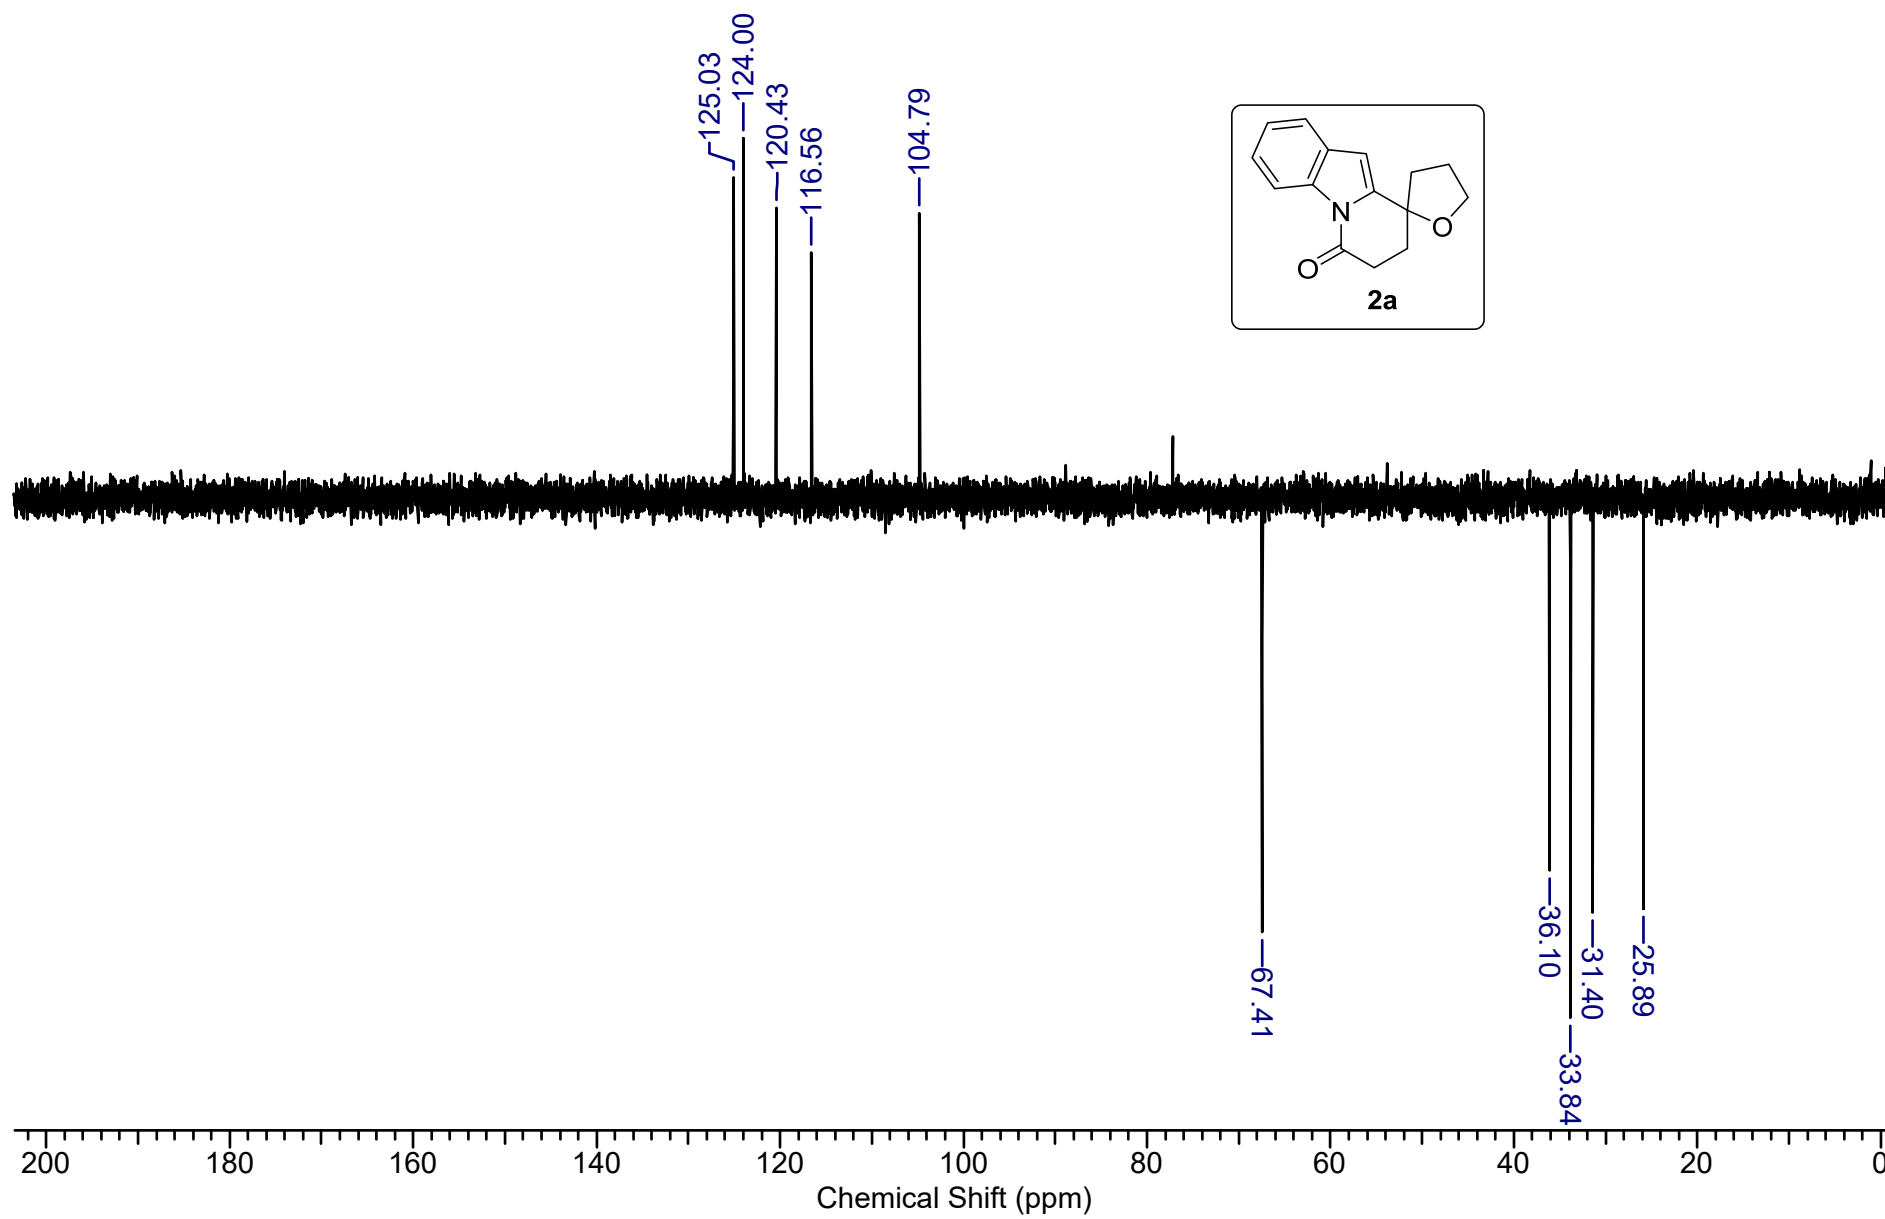

M-8 #457 RT: 2.75 AV: 1 NL: 4.62E8  
T: FTMS + p ESI Full ms [100.0000-1500.0000]

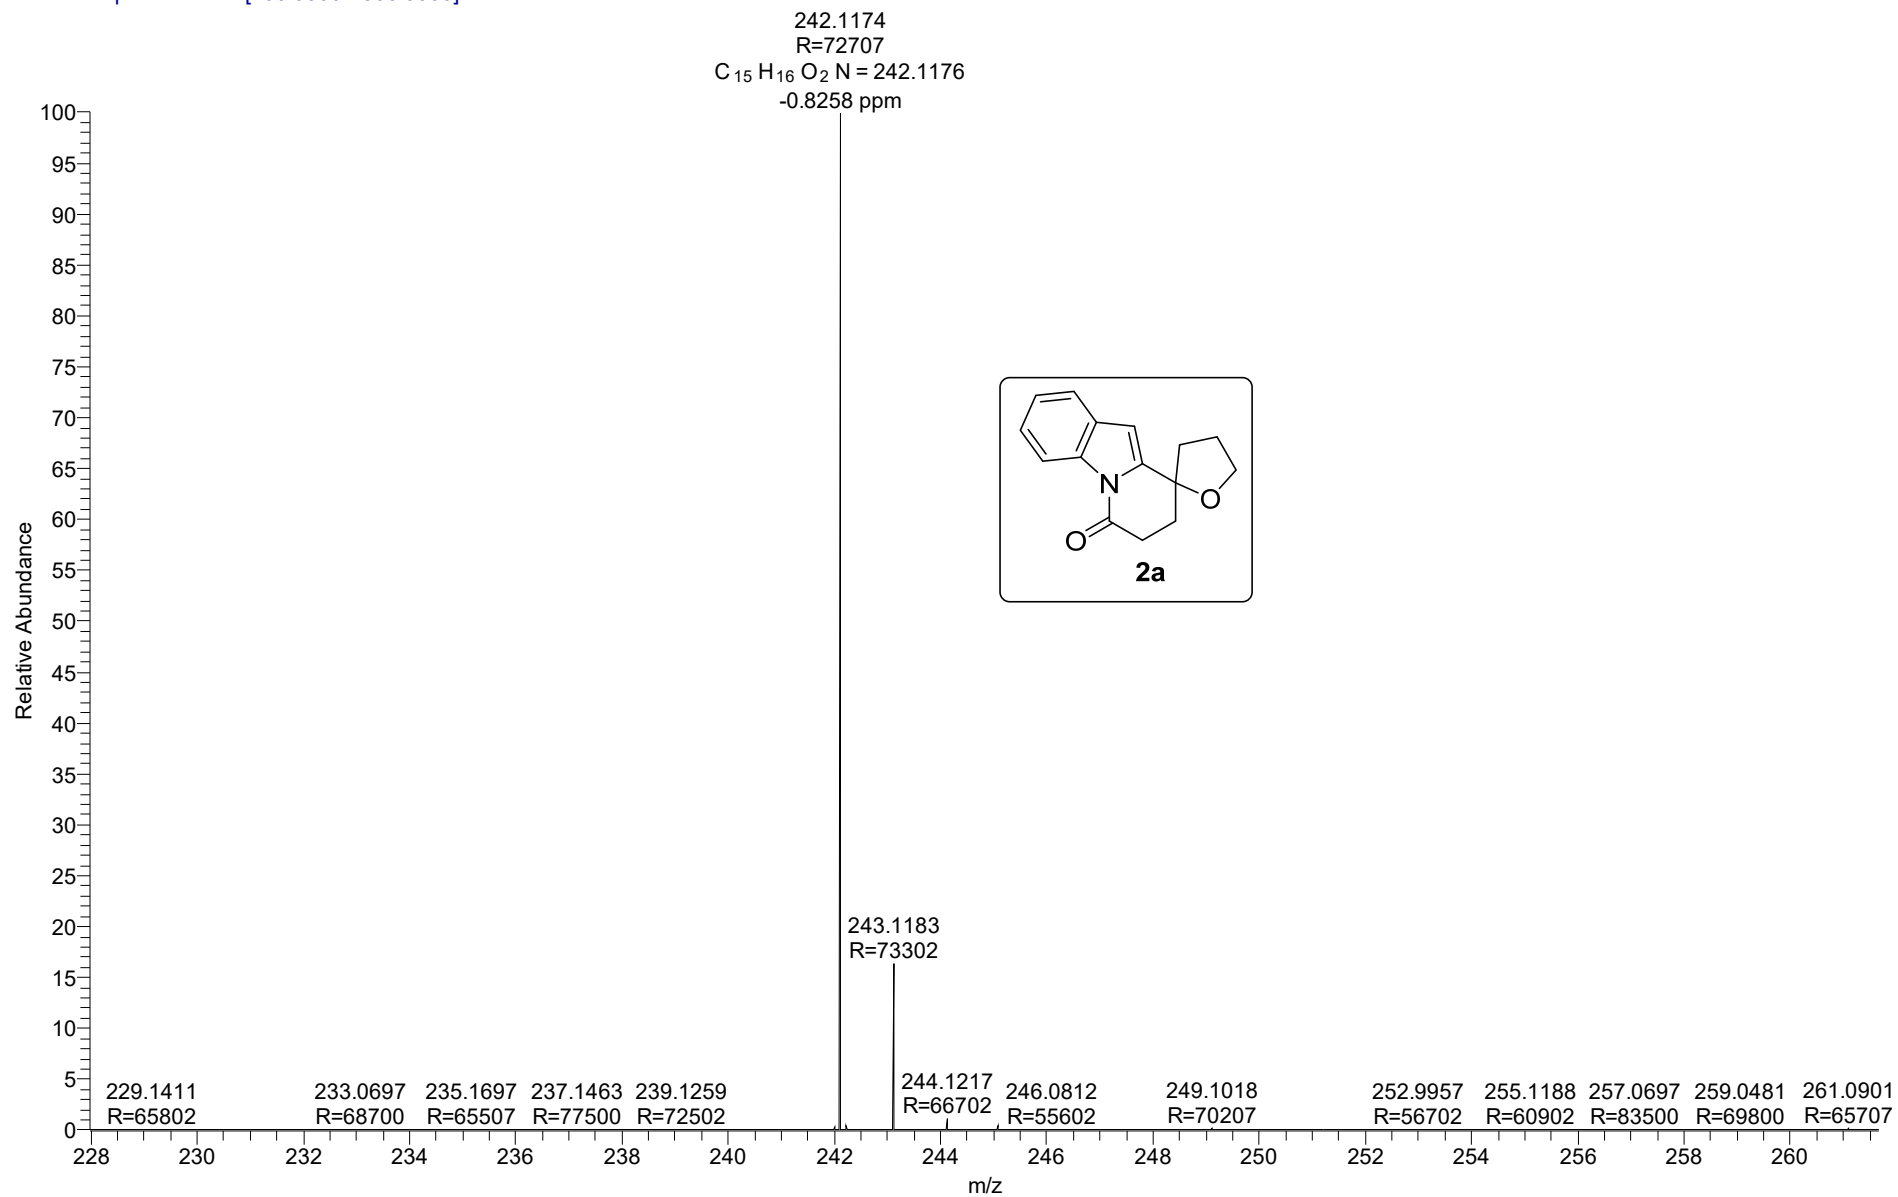

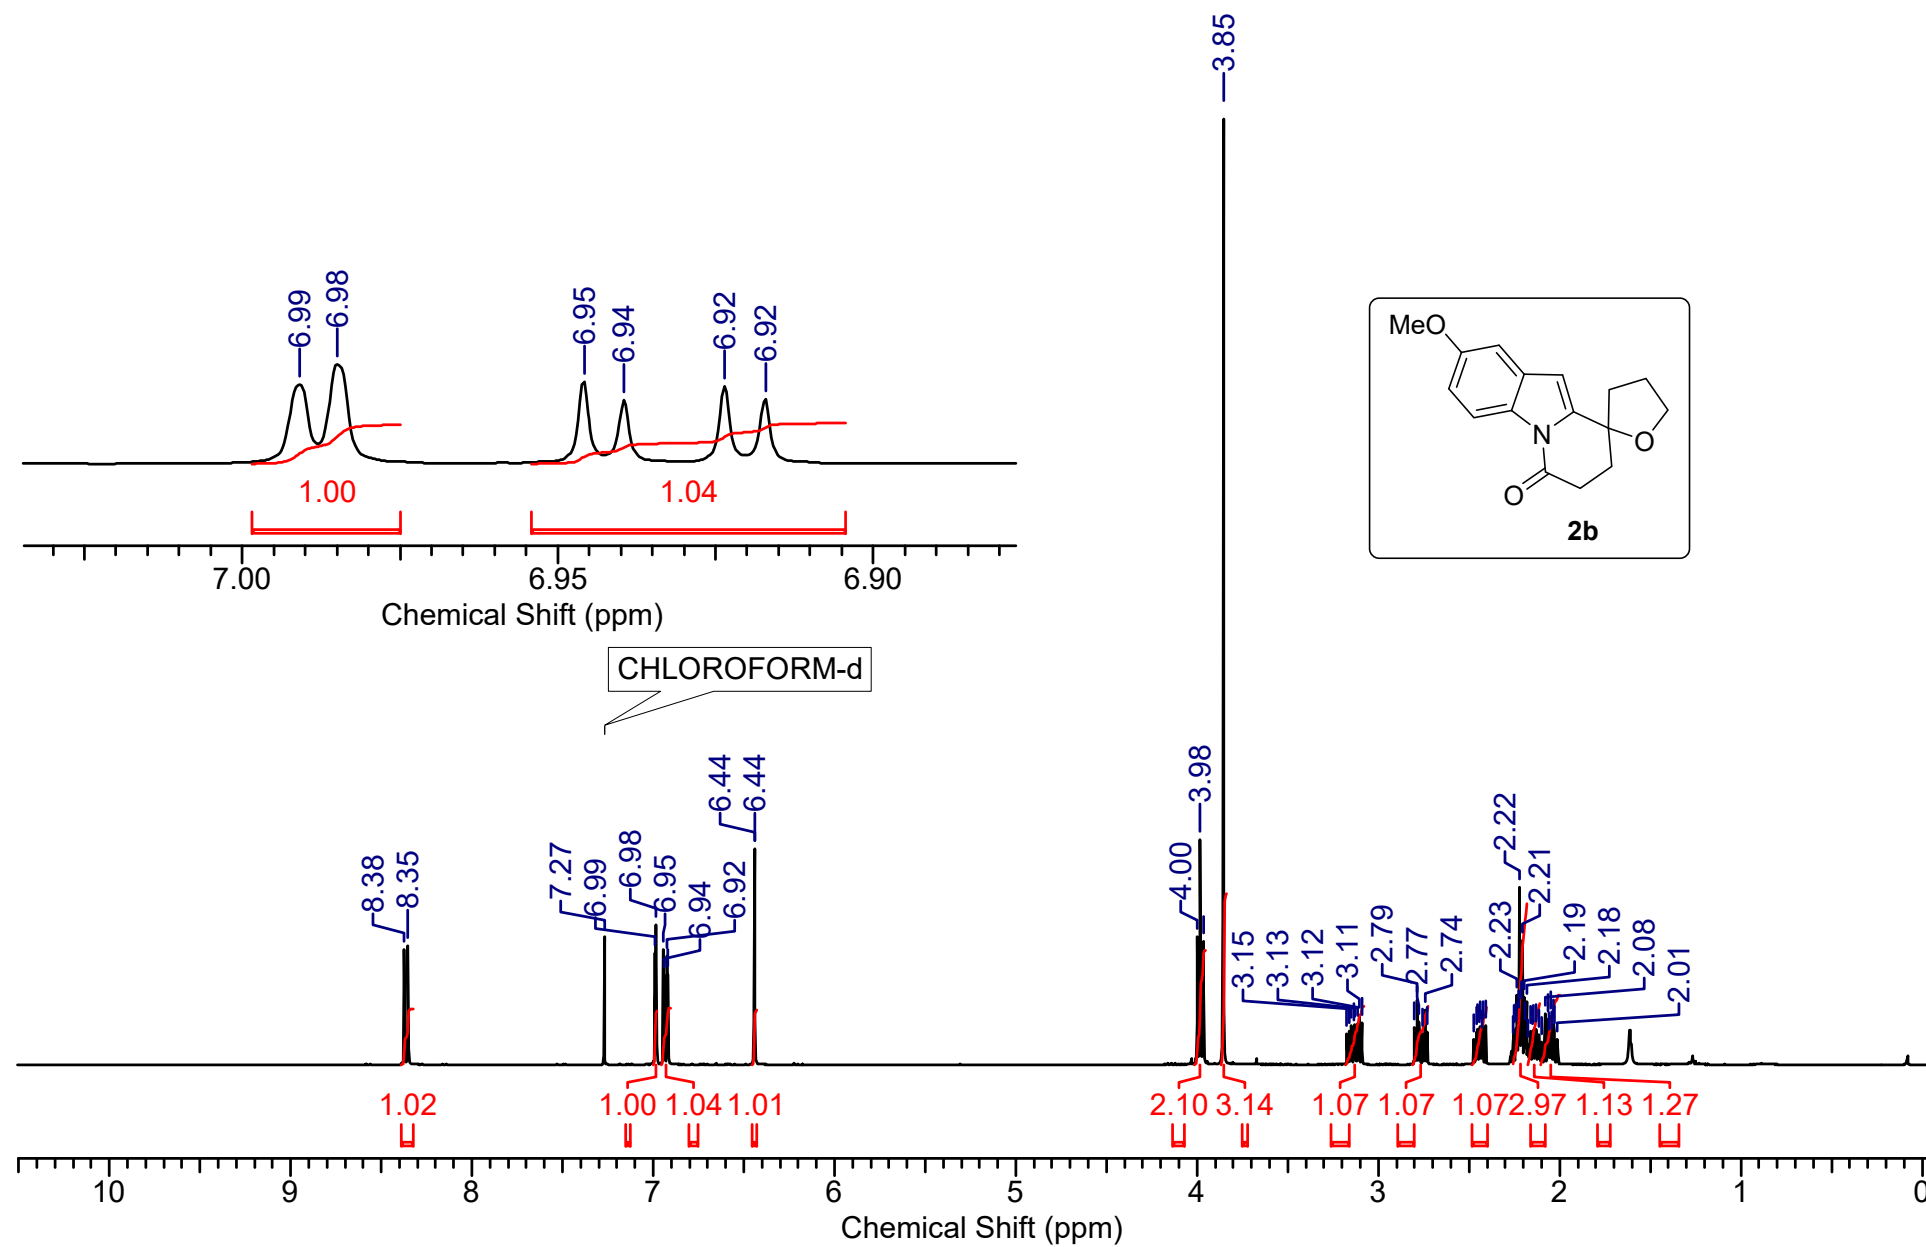

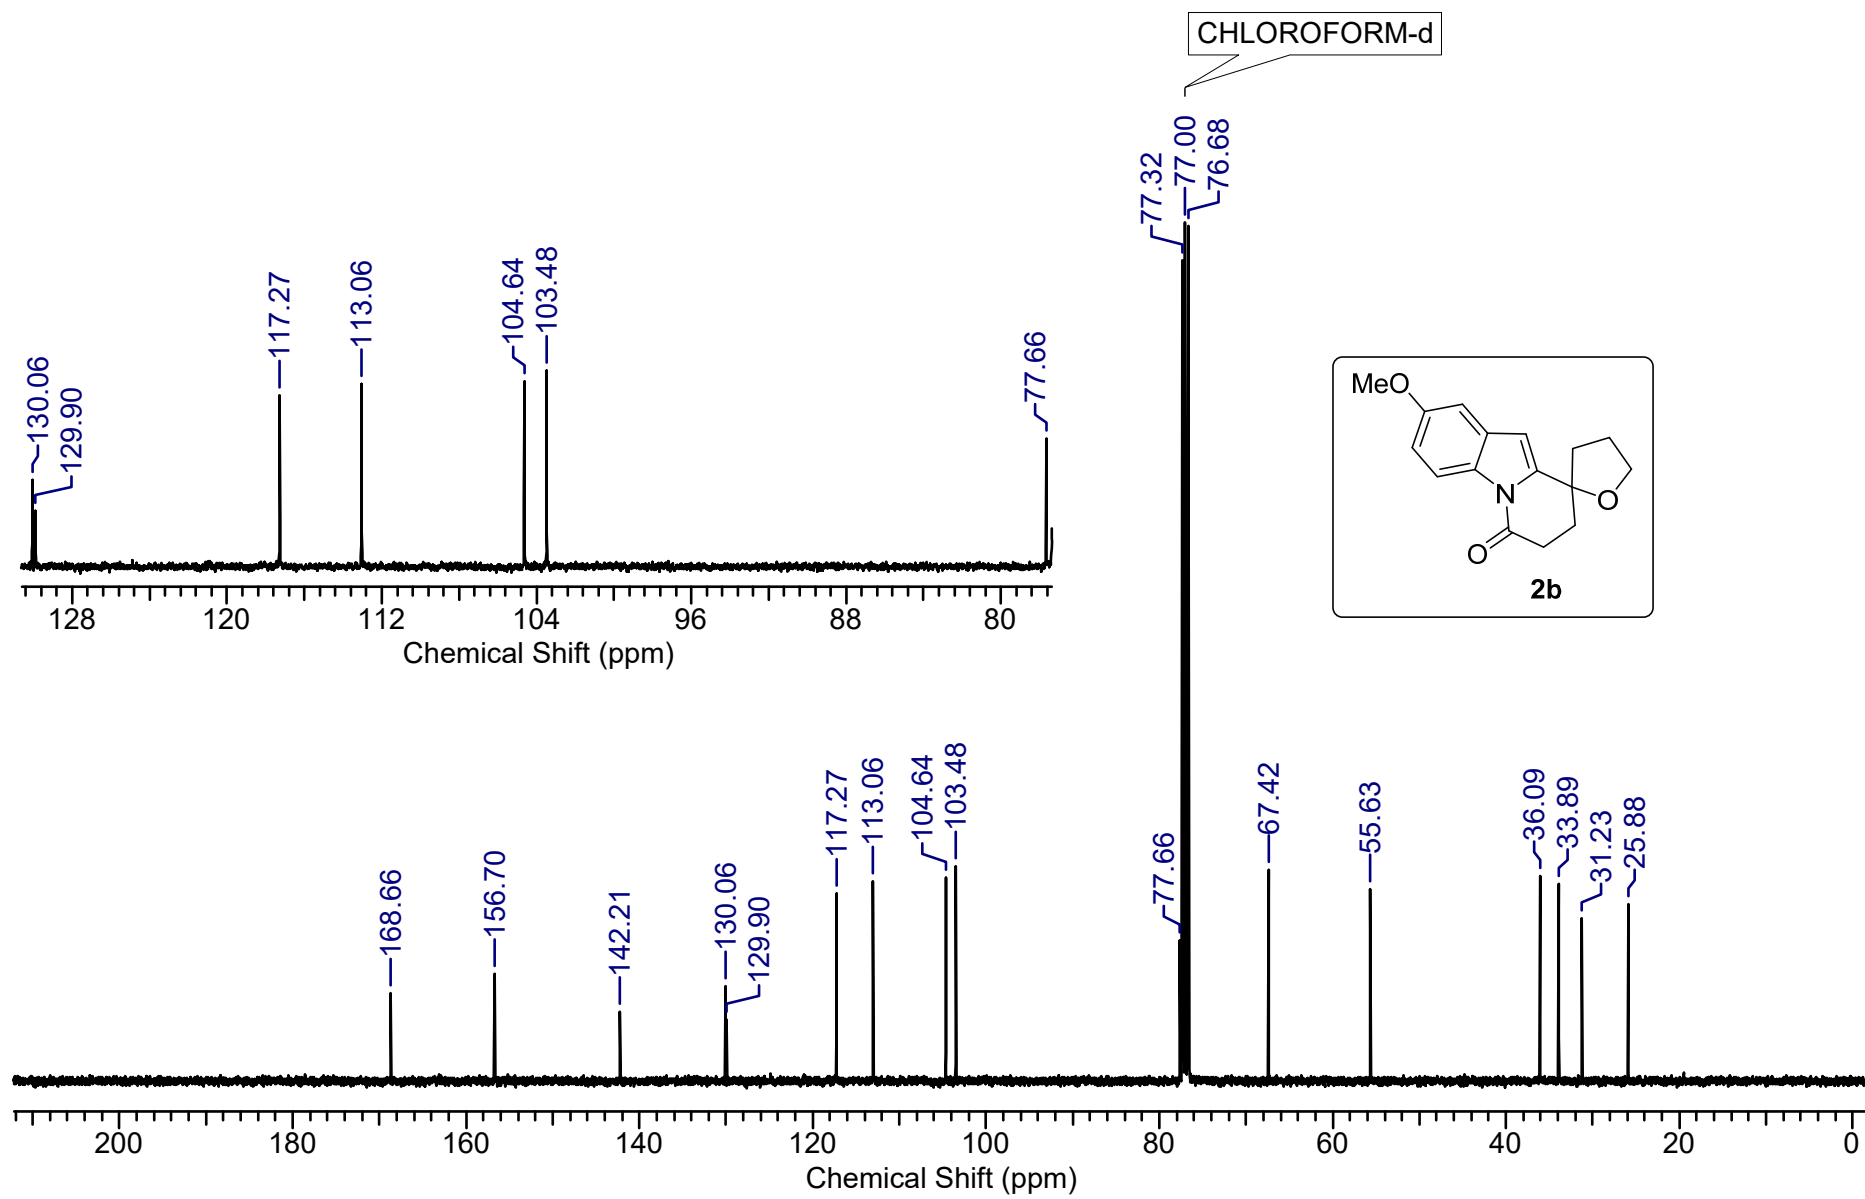

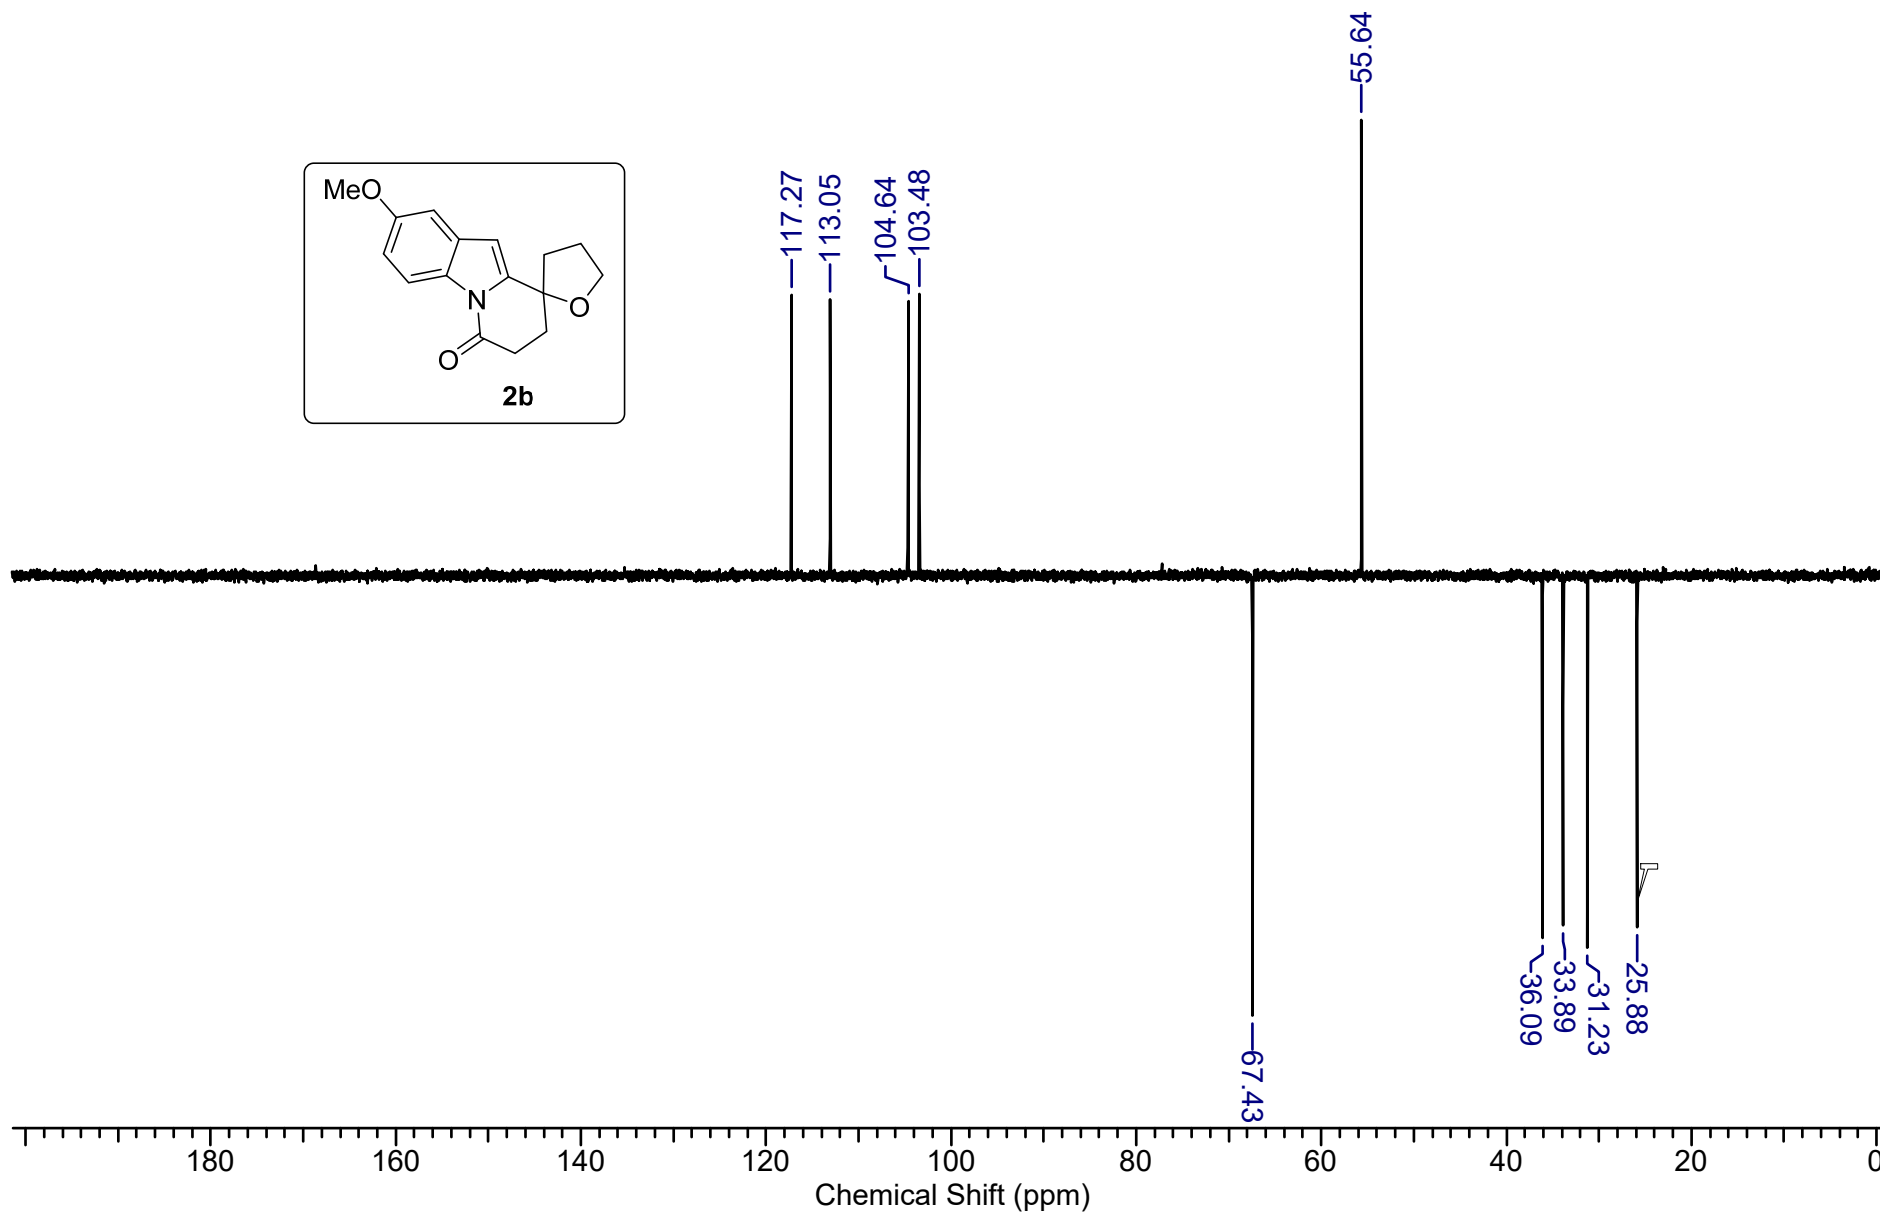

MS-3a #250 RT: 1.34 AV: 1 NL: 3.72E7  
T: FTMS + p ESI Full ms [100.0000-1500.0000]

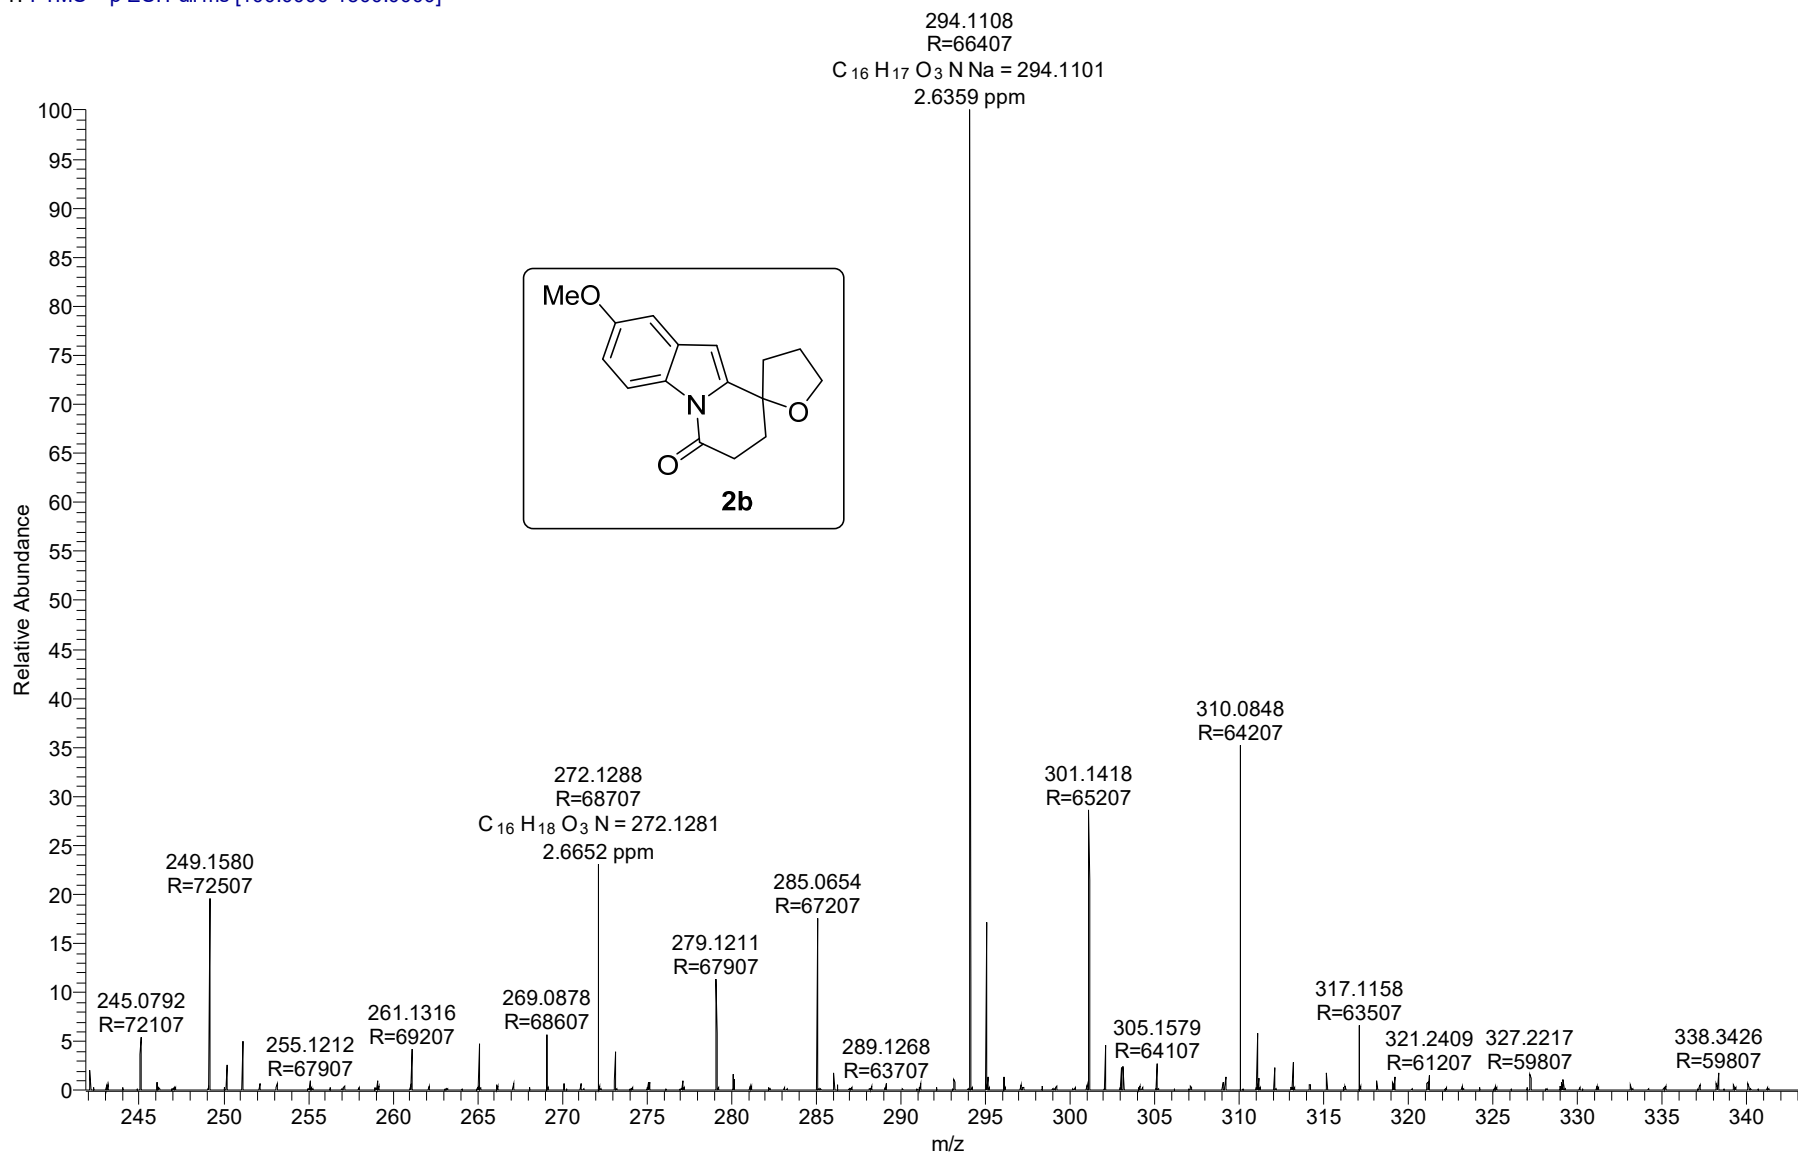

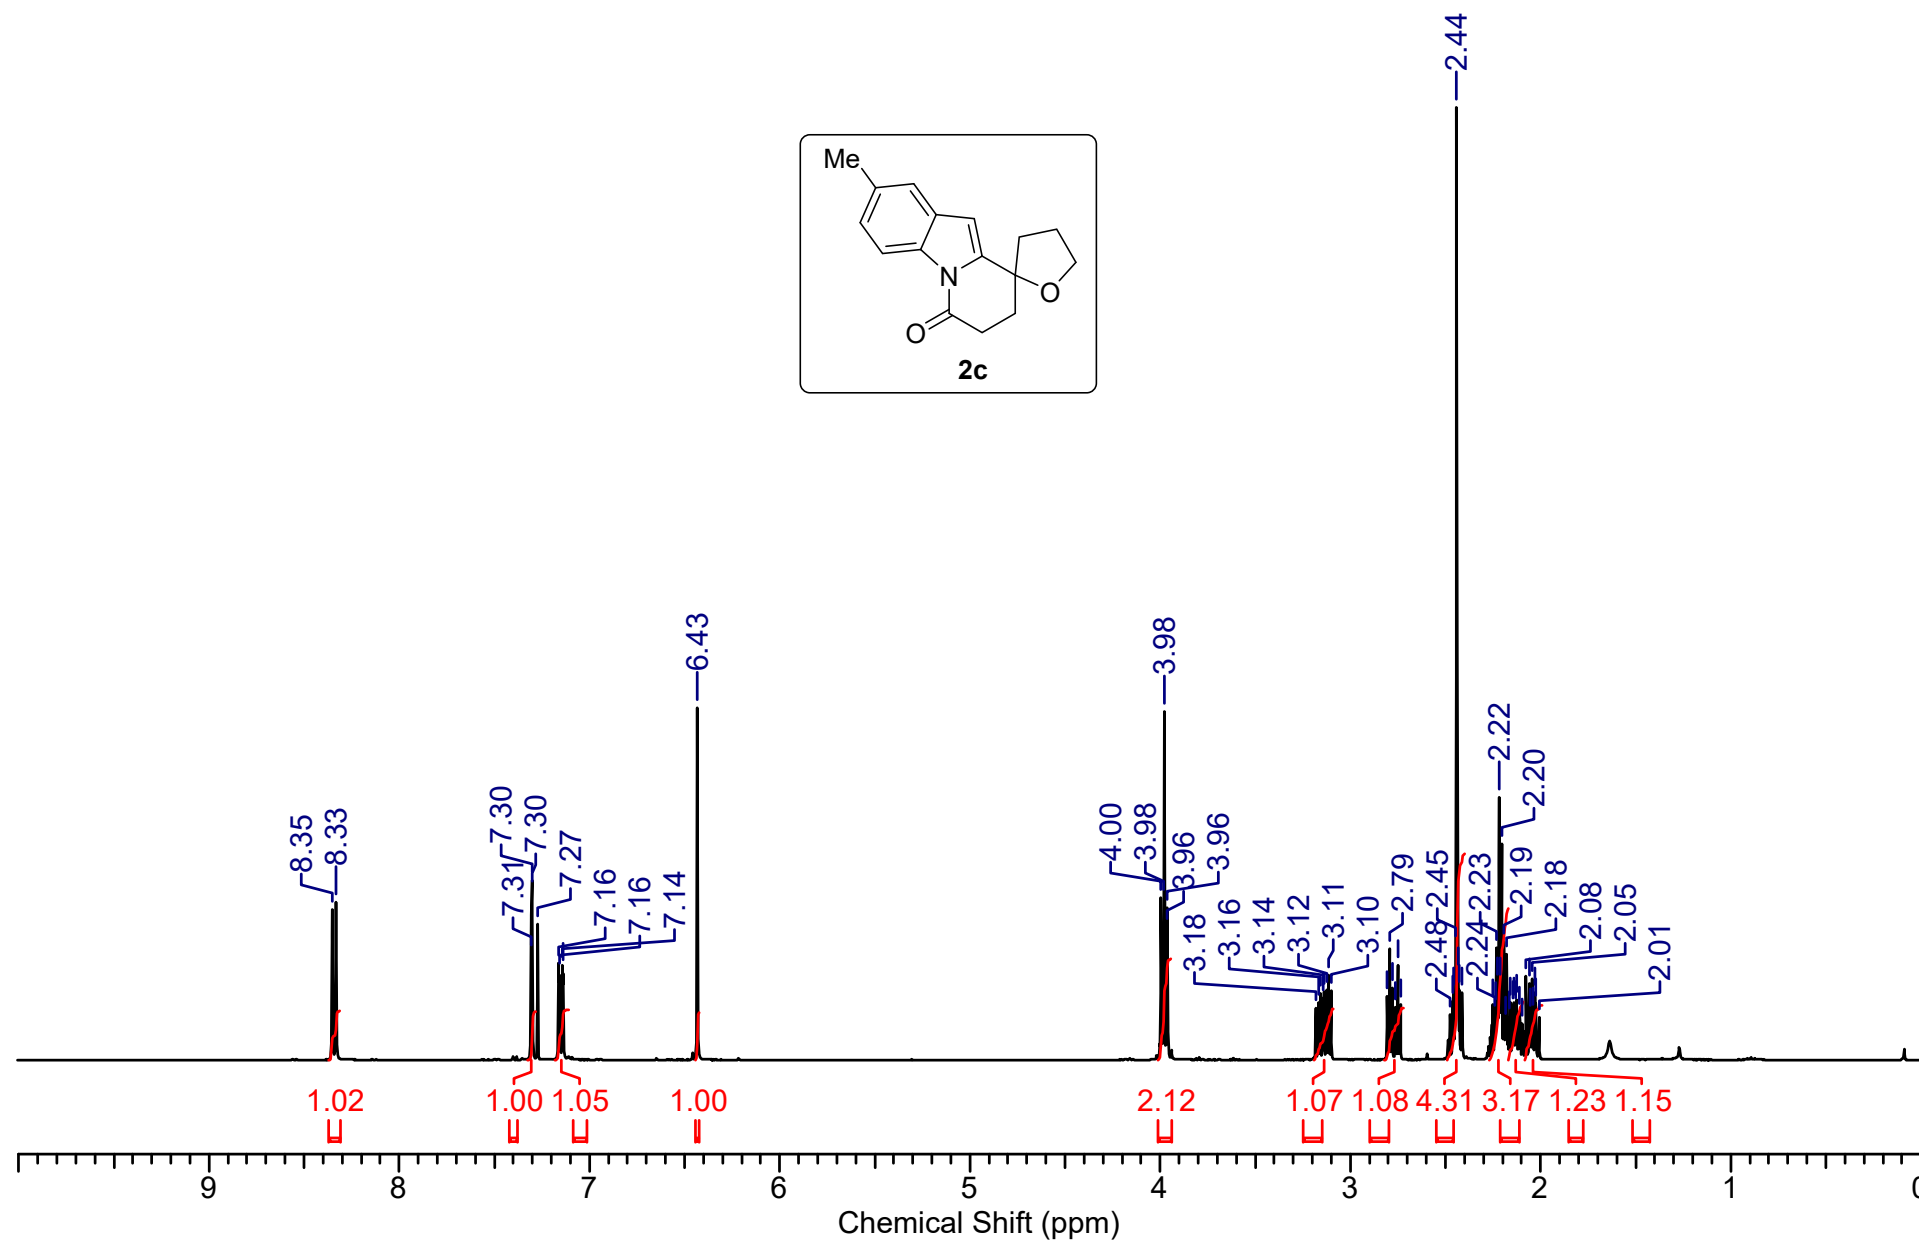



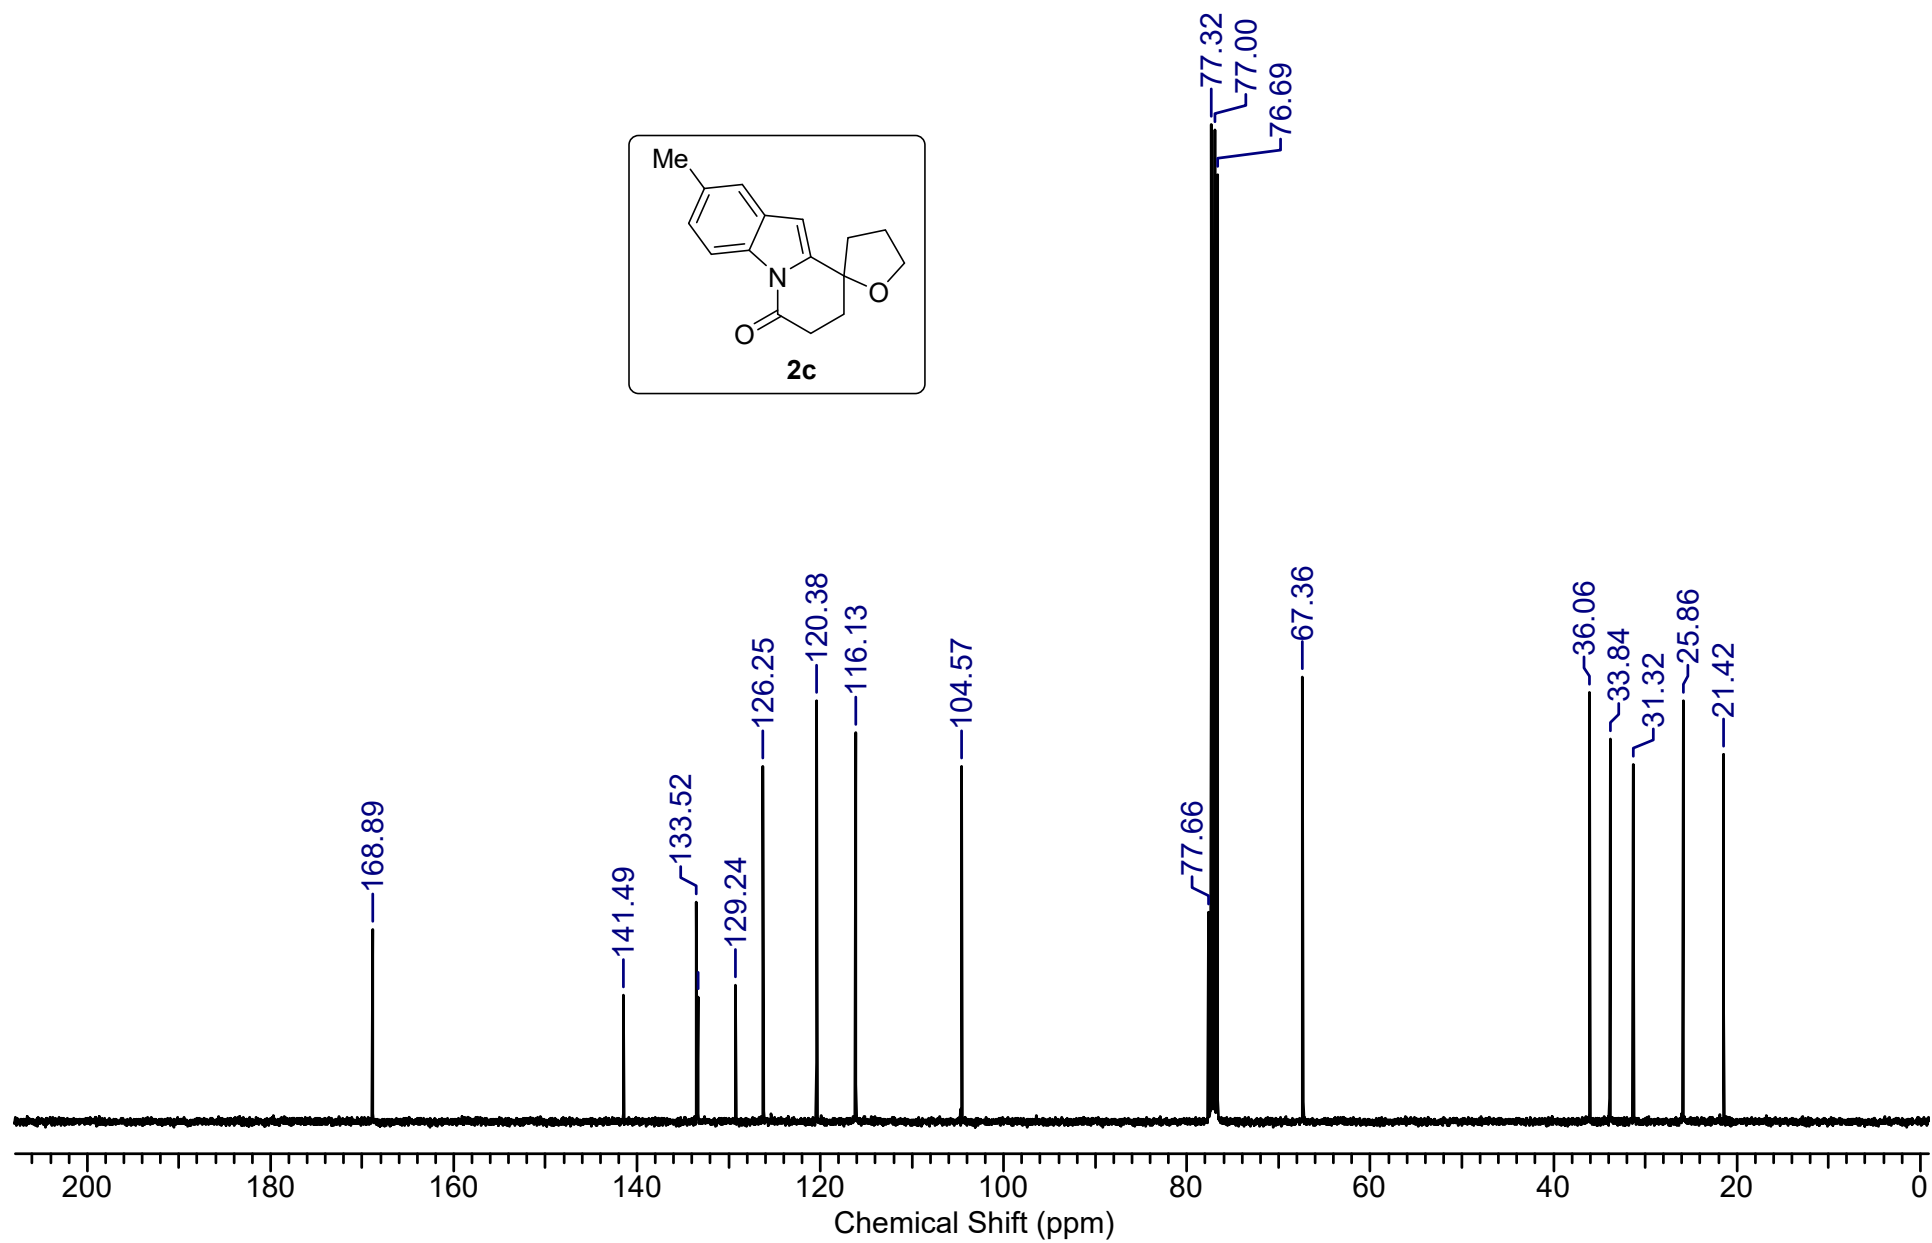

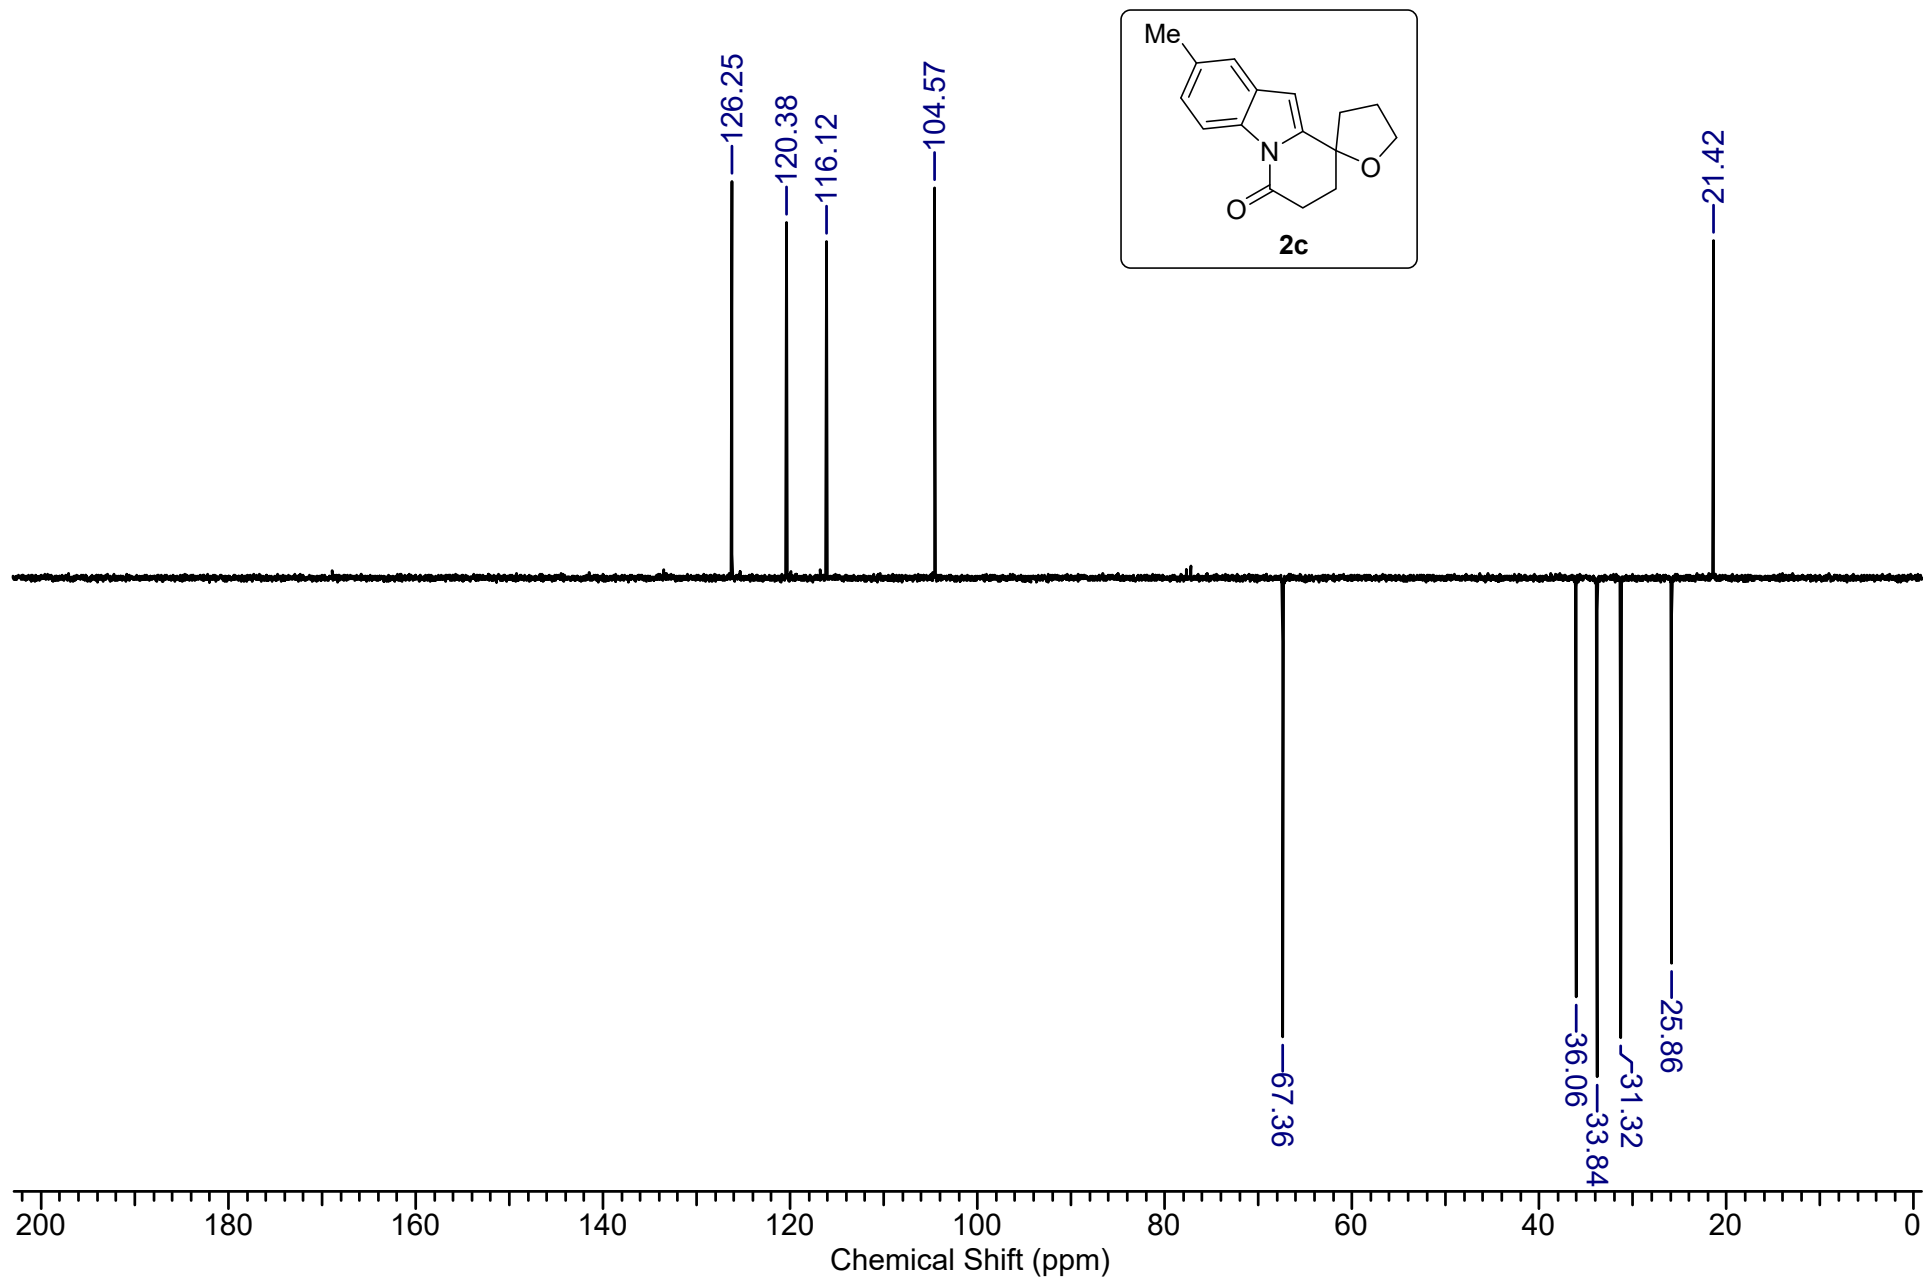

MS-2a #302 RT: 1.61 AV: 1 NL: 9.27E7  
T: FTMS + p ESI Full ms [100.0000-1500.0000]

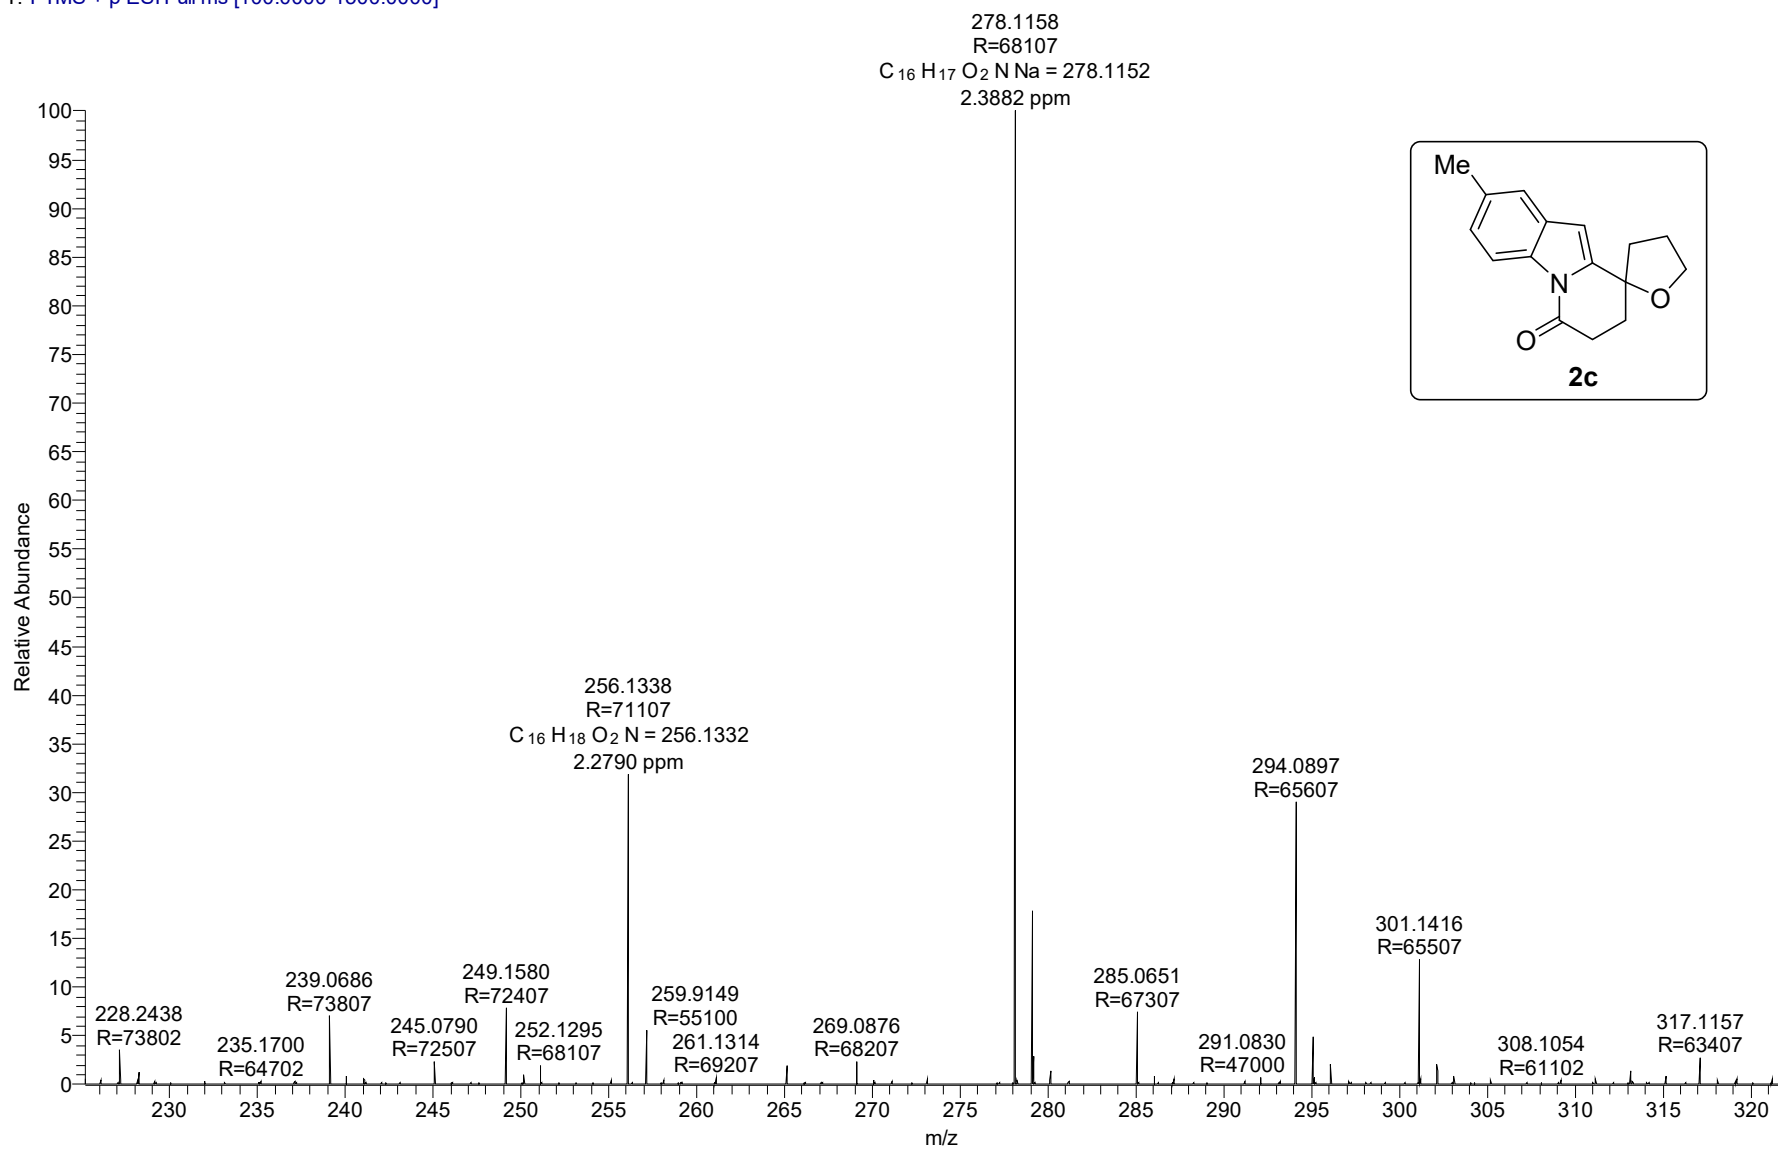

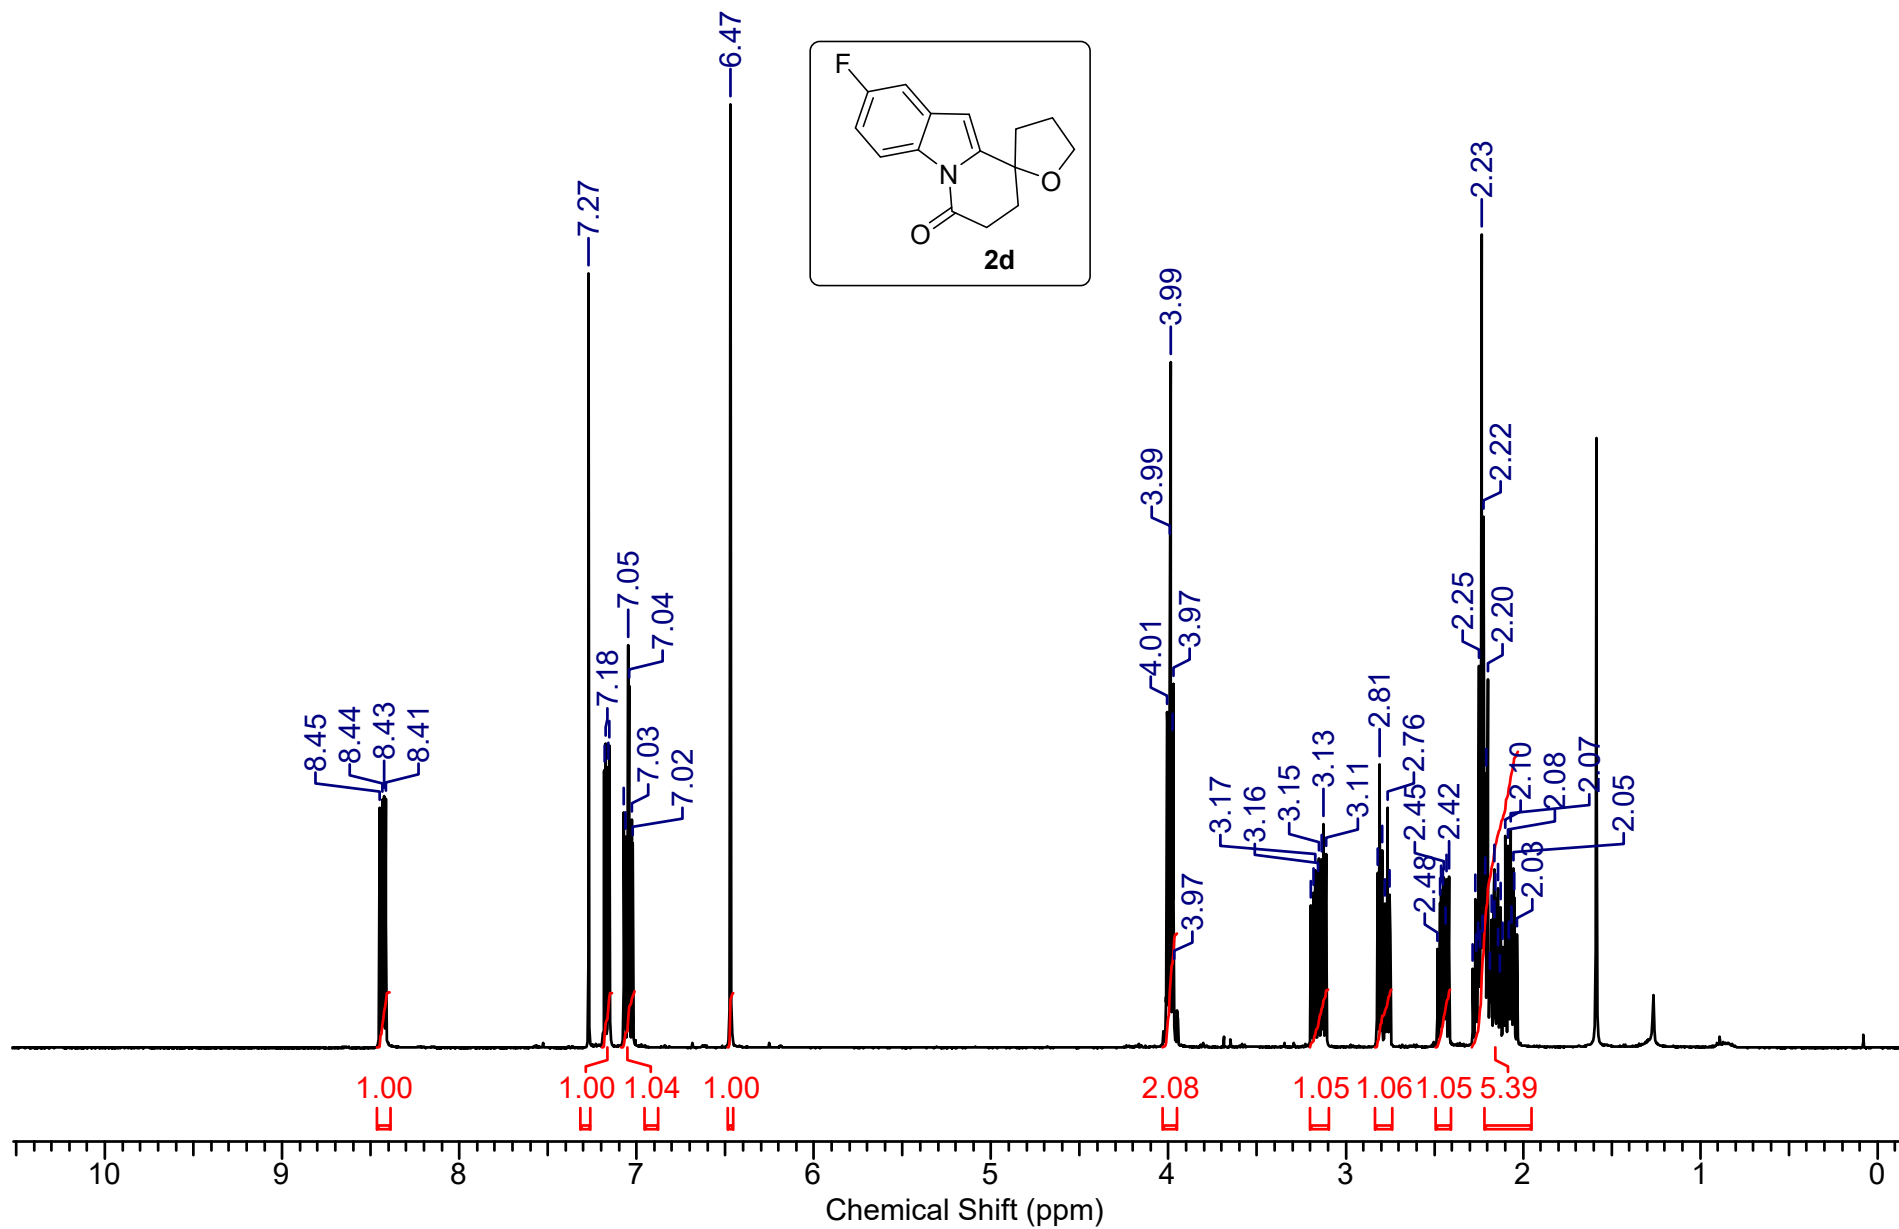

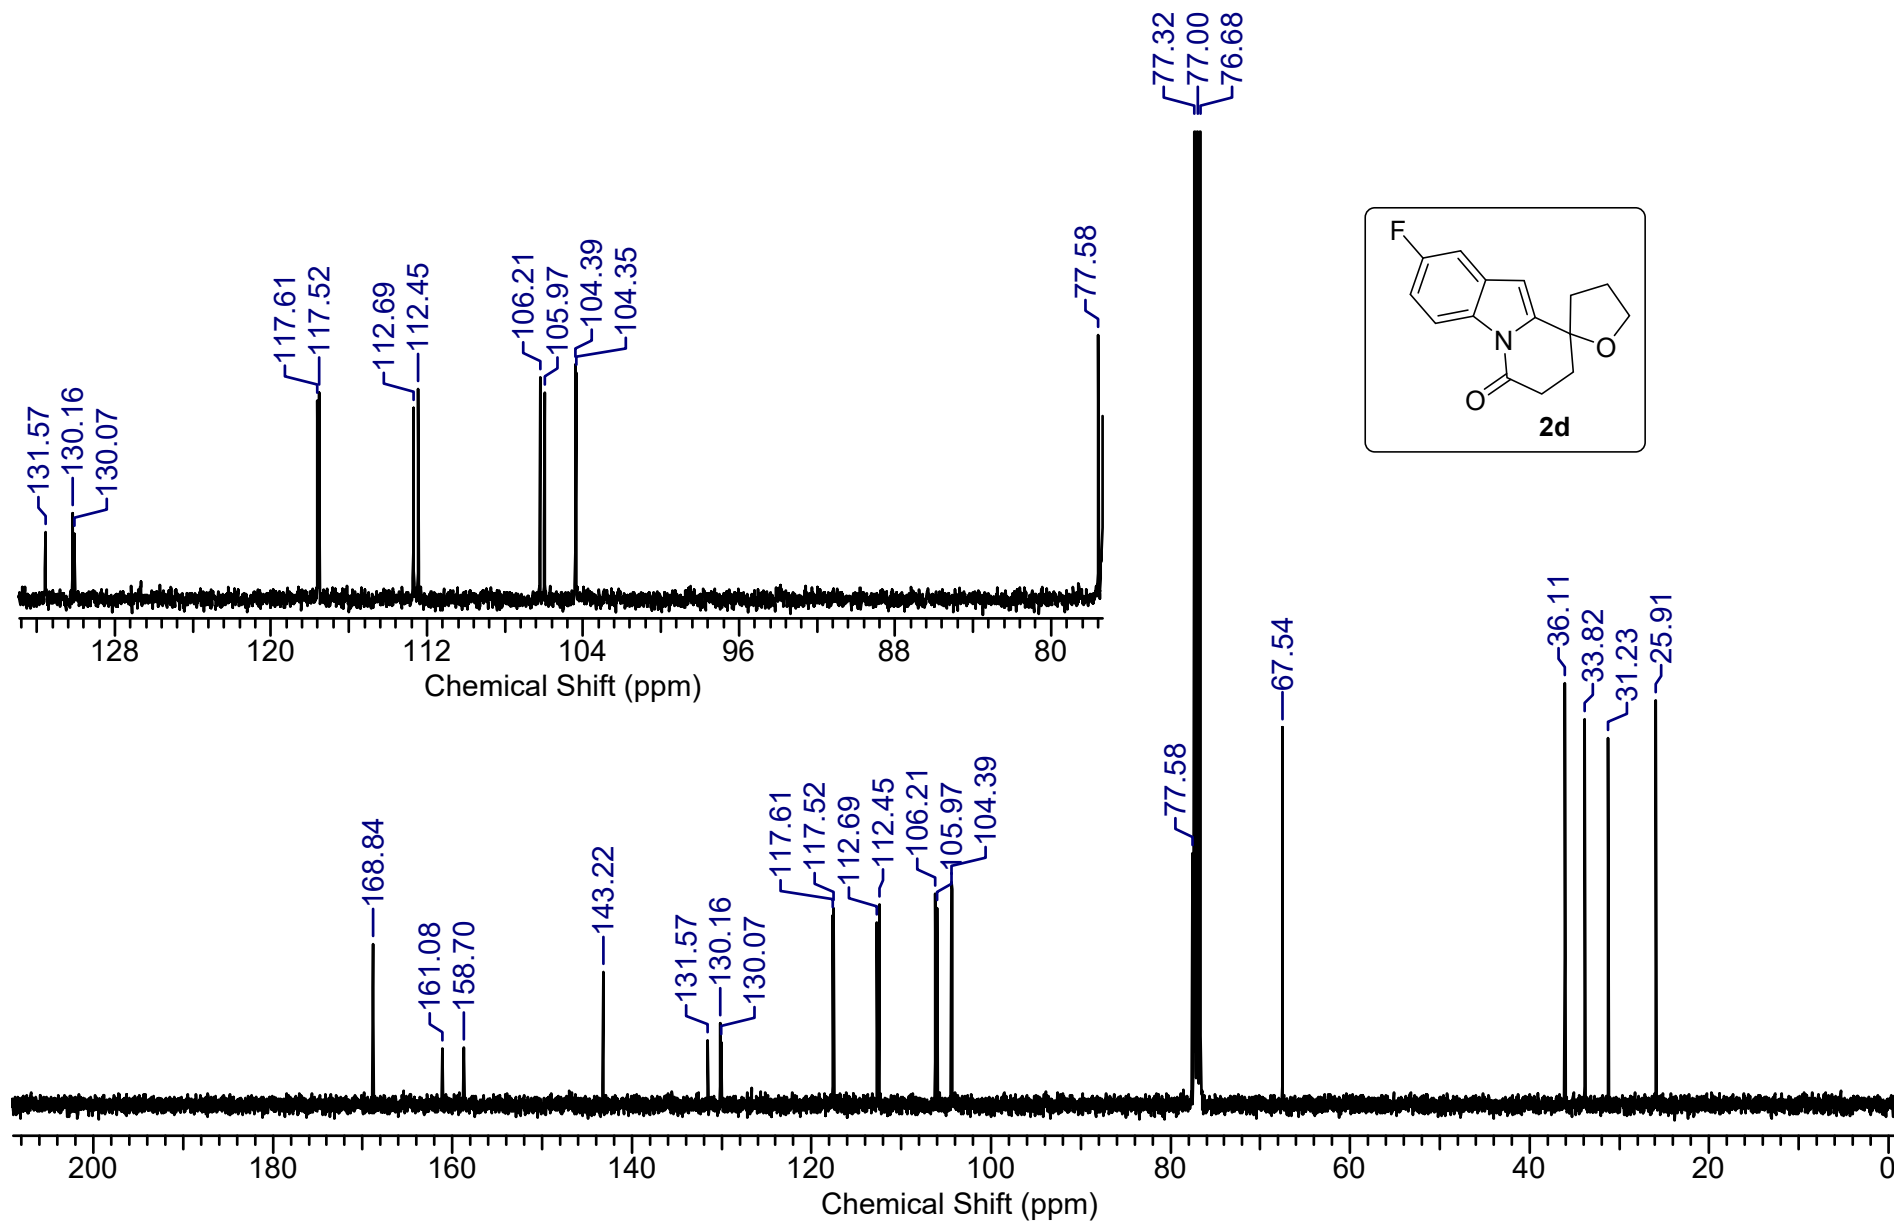

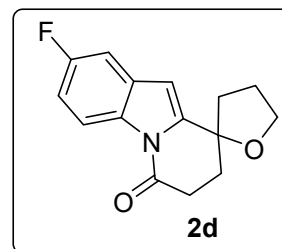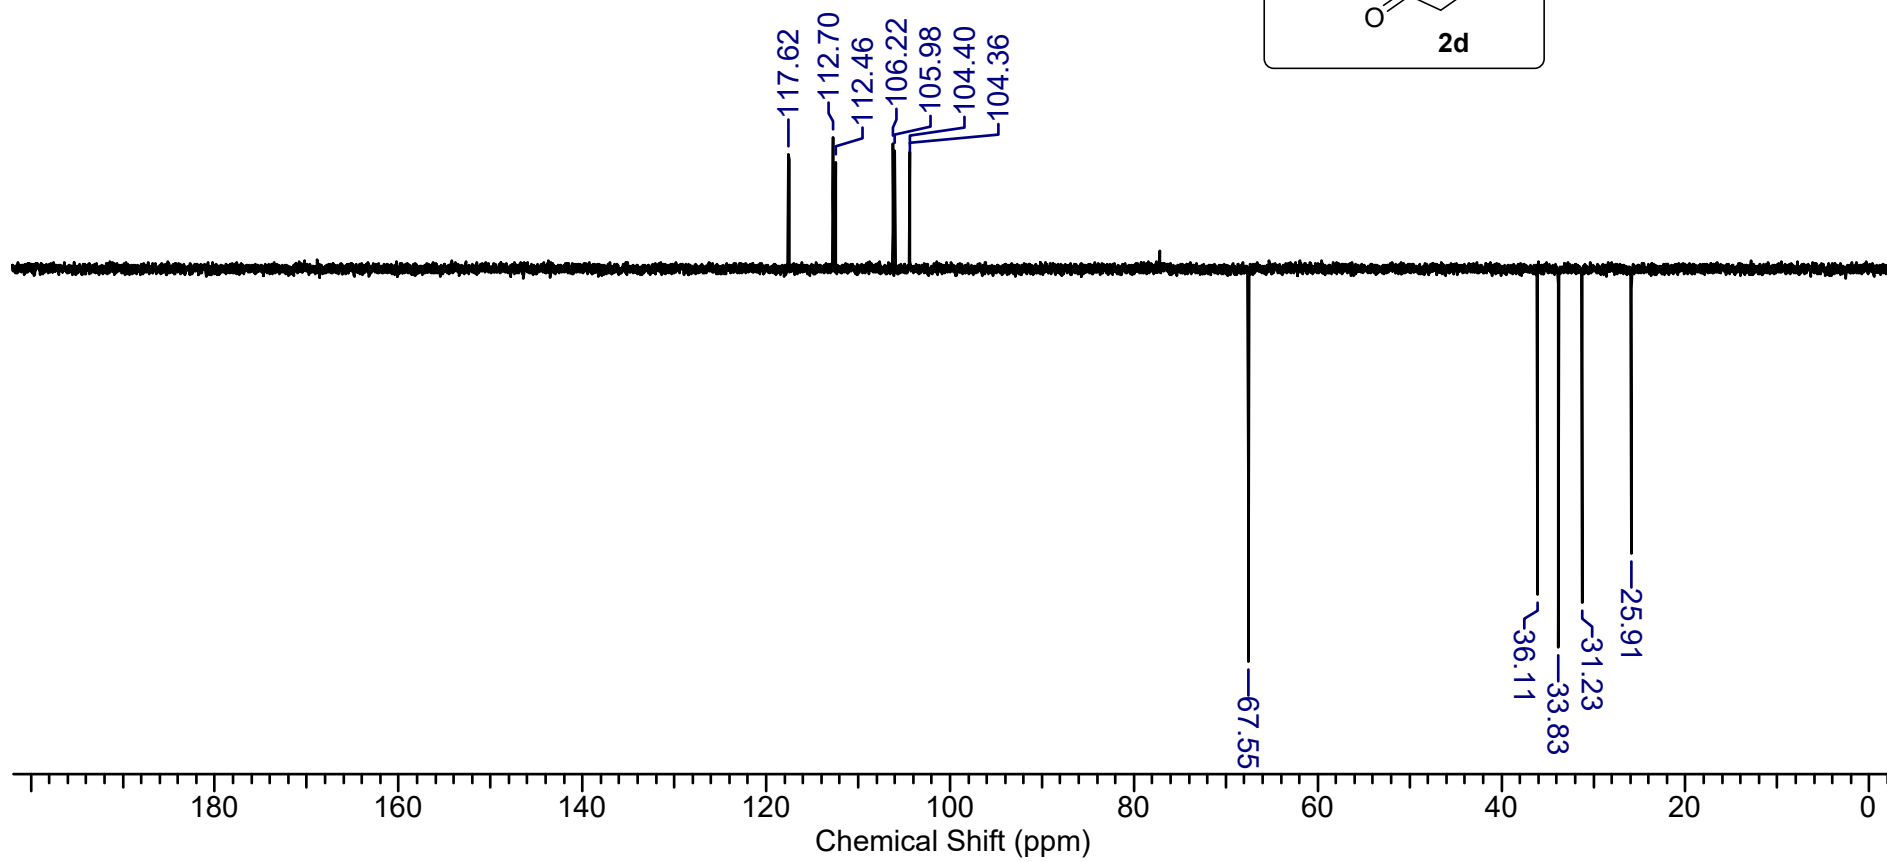

-118.85

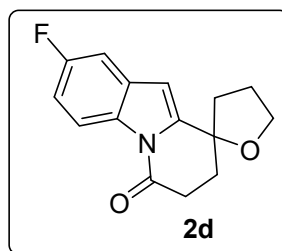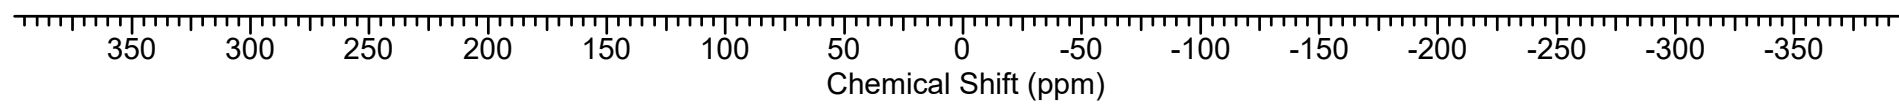

MS-4a #253 RT: 1.35 AV: 1 NL: 3.65E7  
T: FTMS + p ESI Full ms [100.0000-1500.0000]

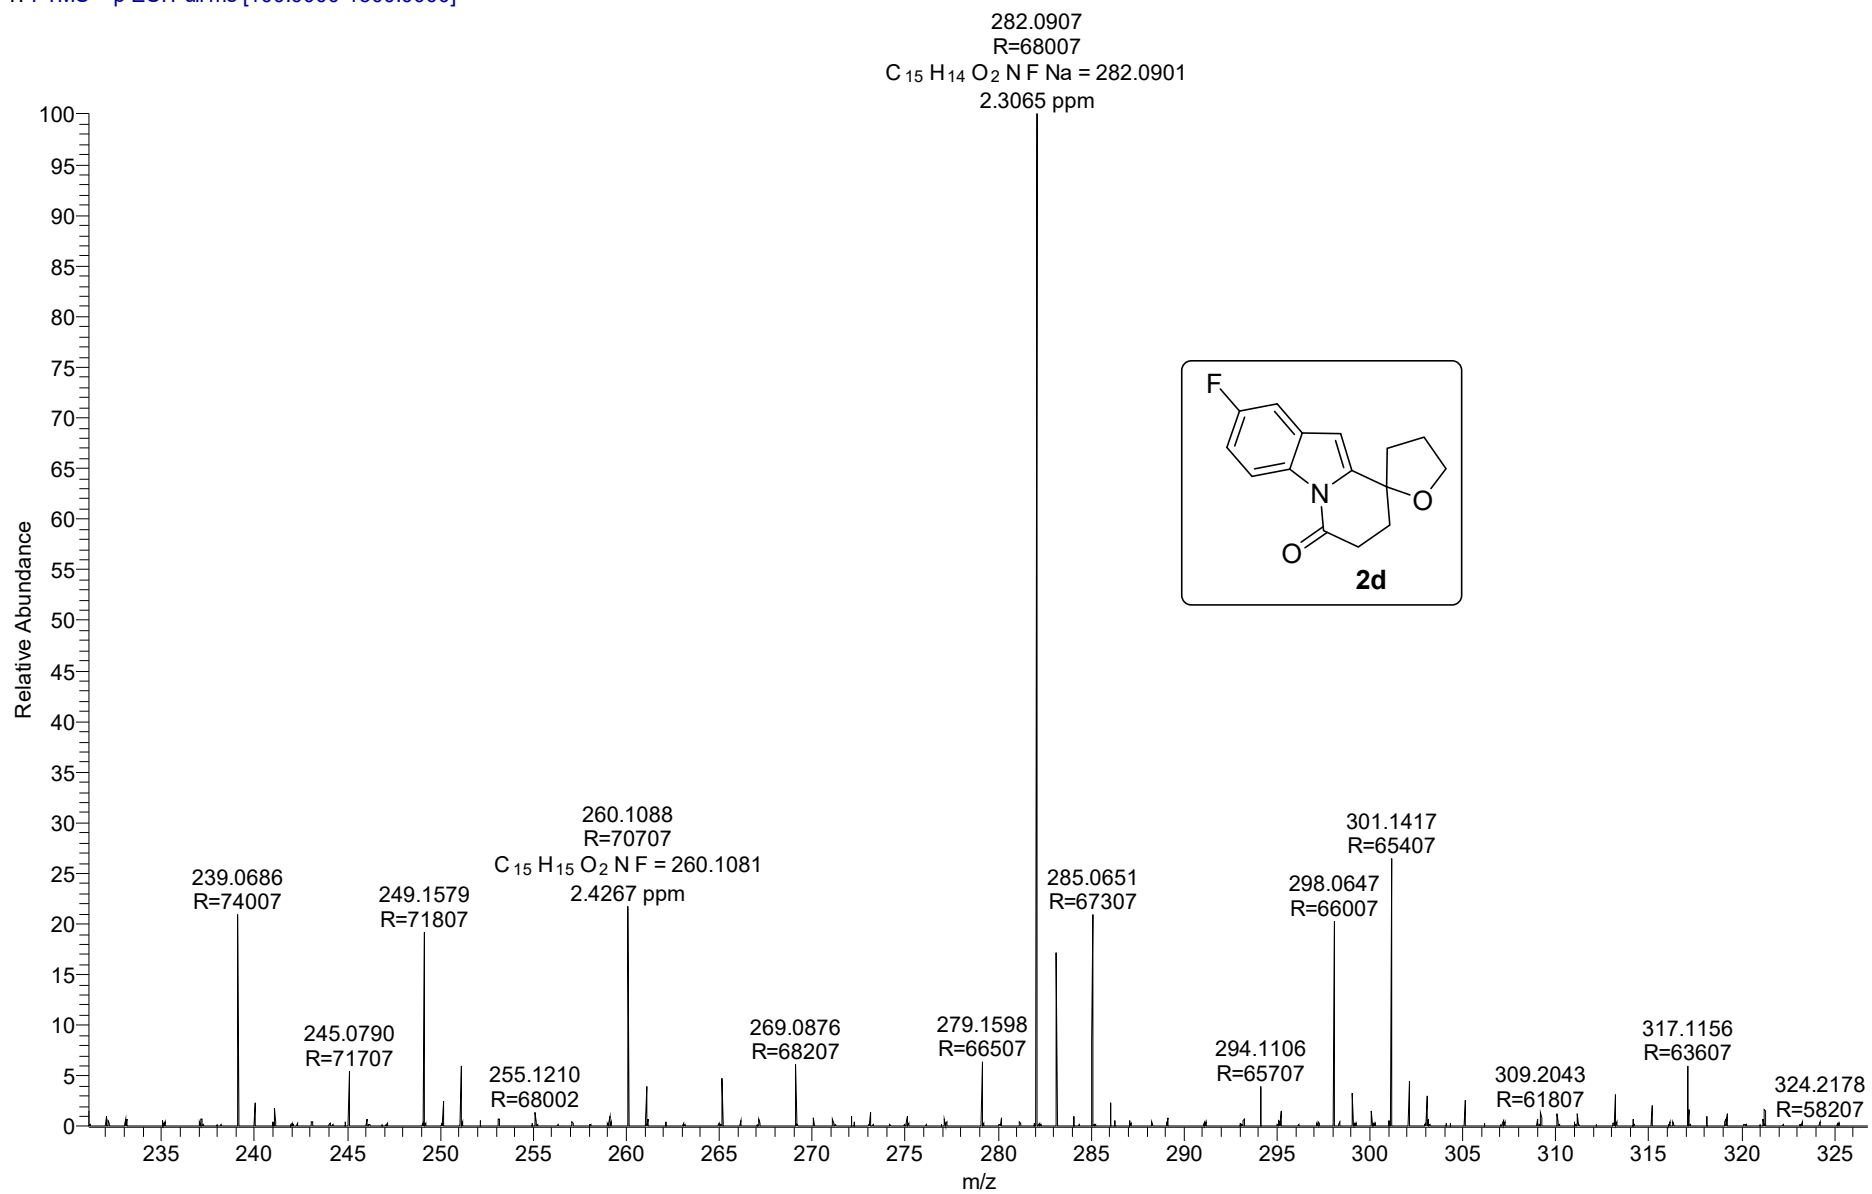



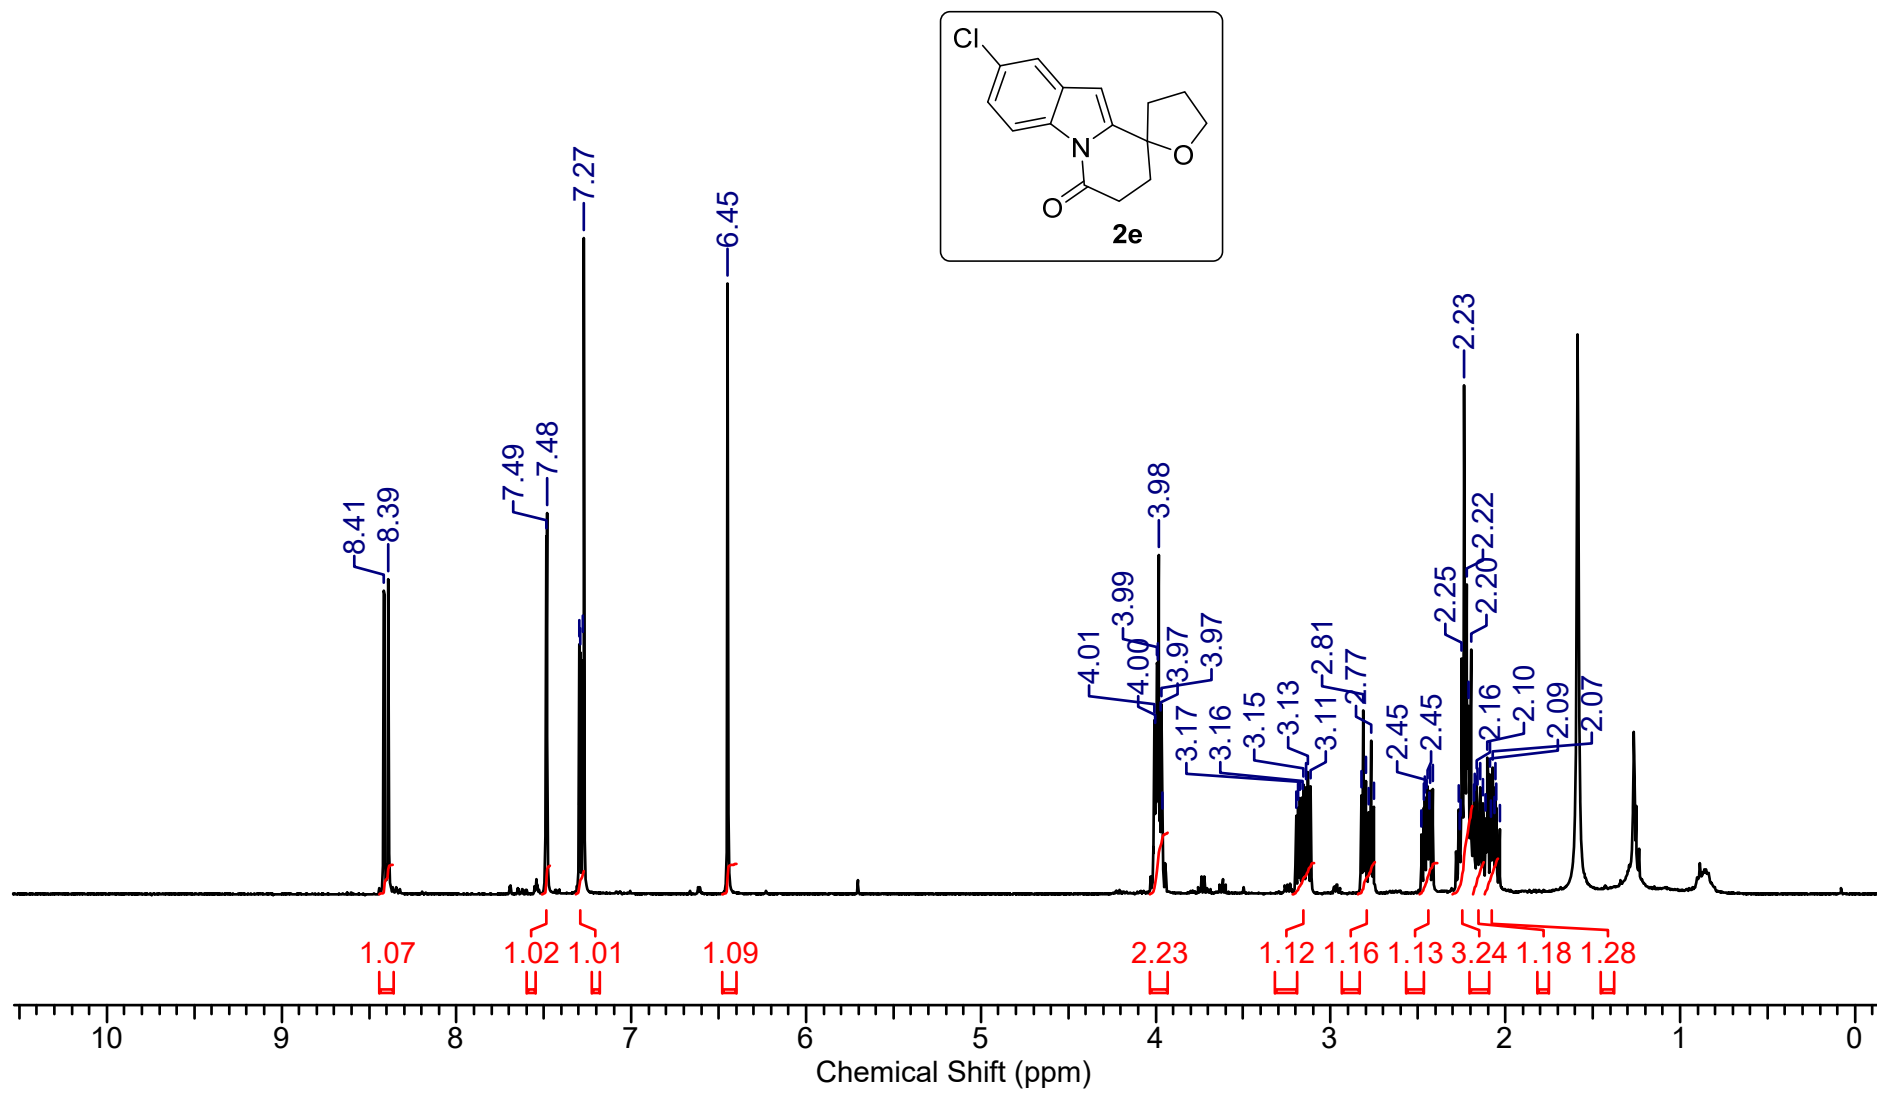

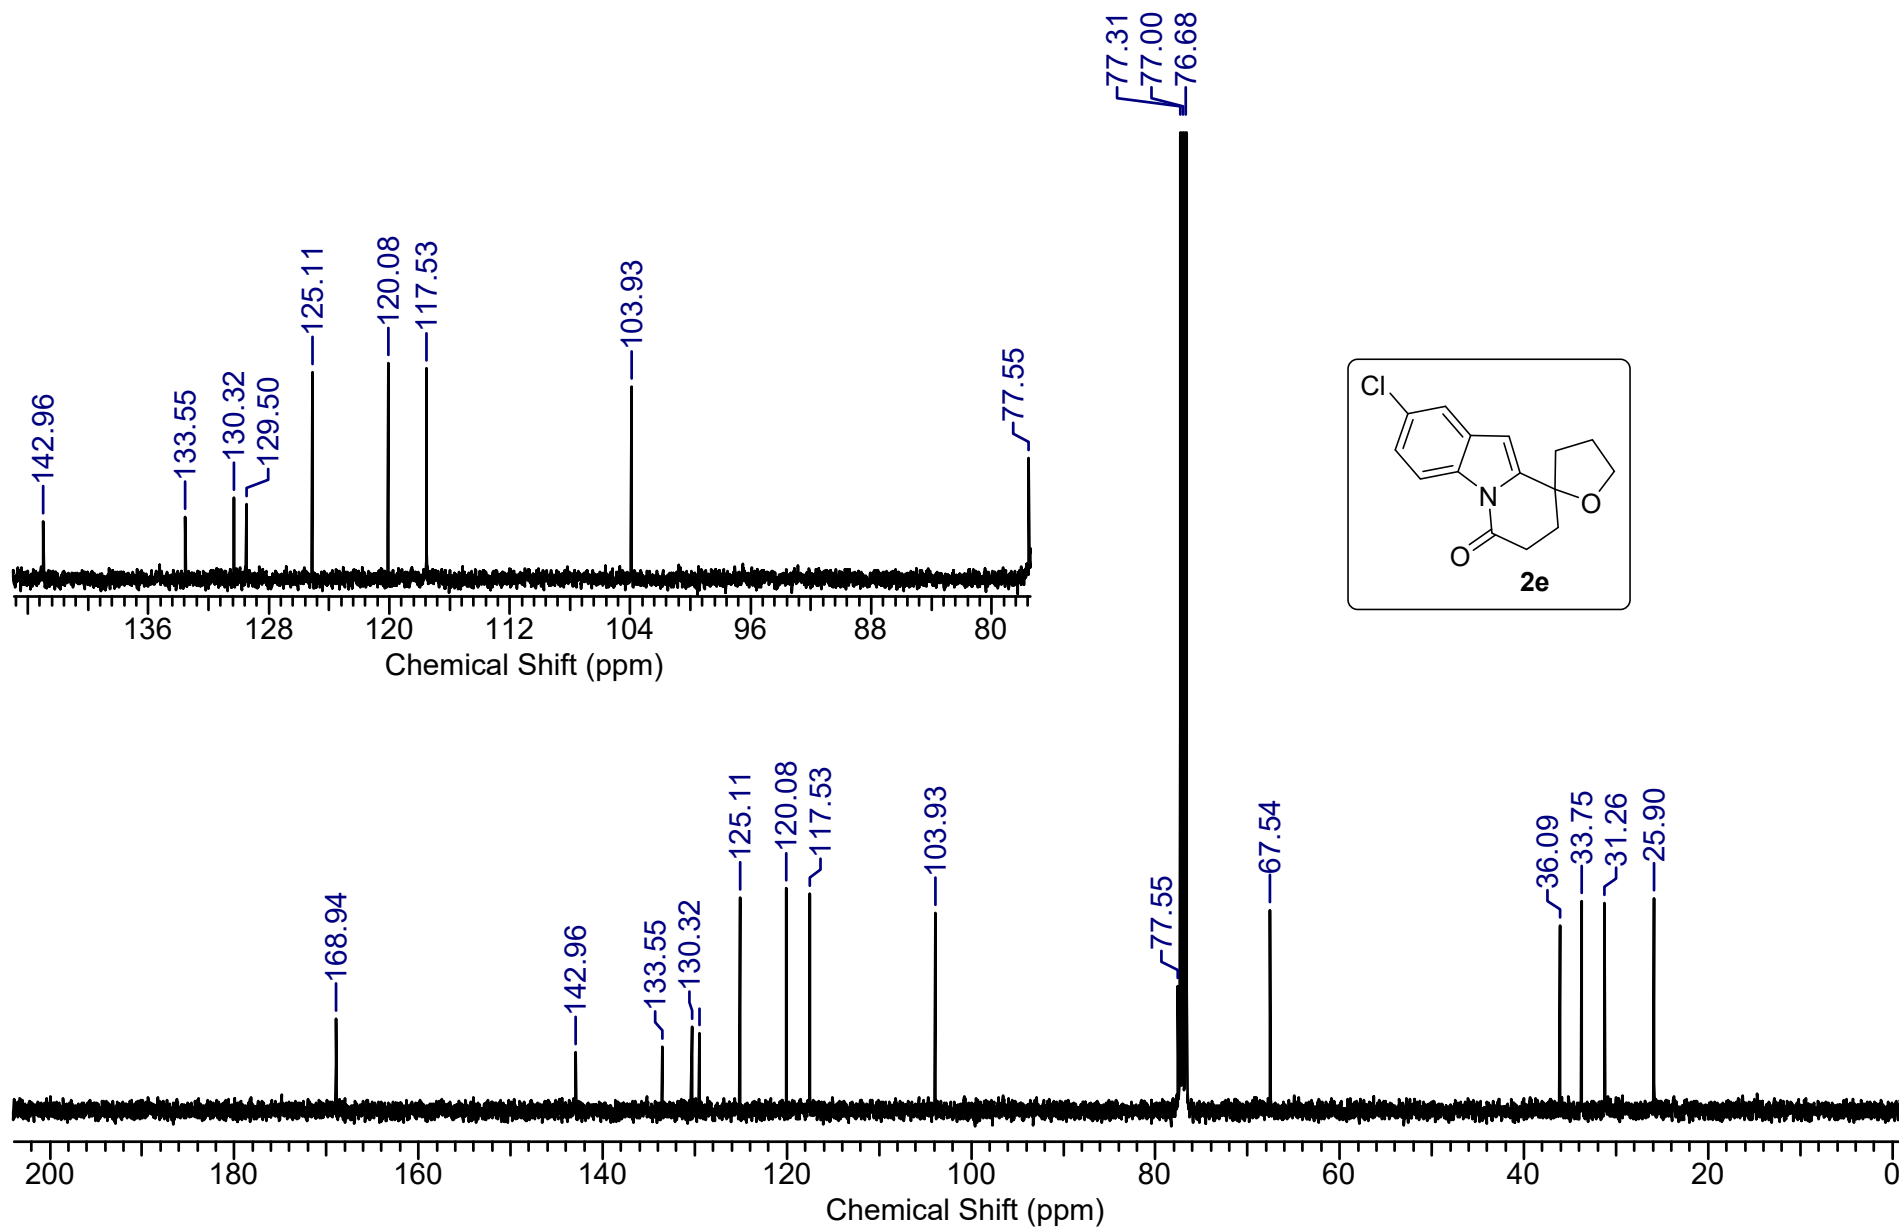

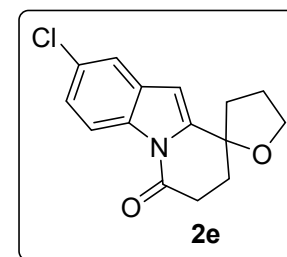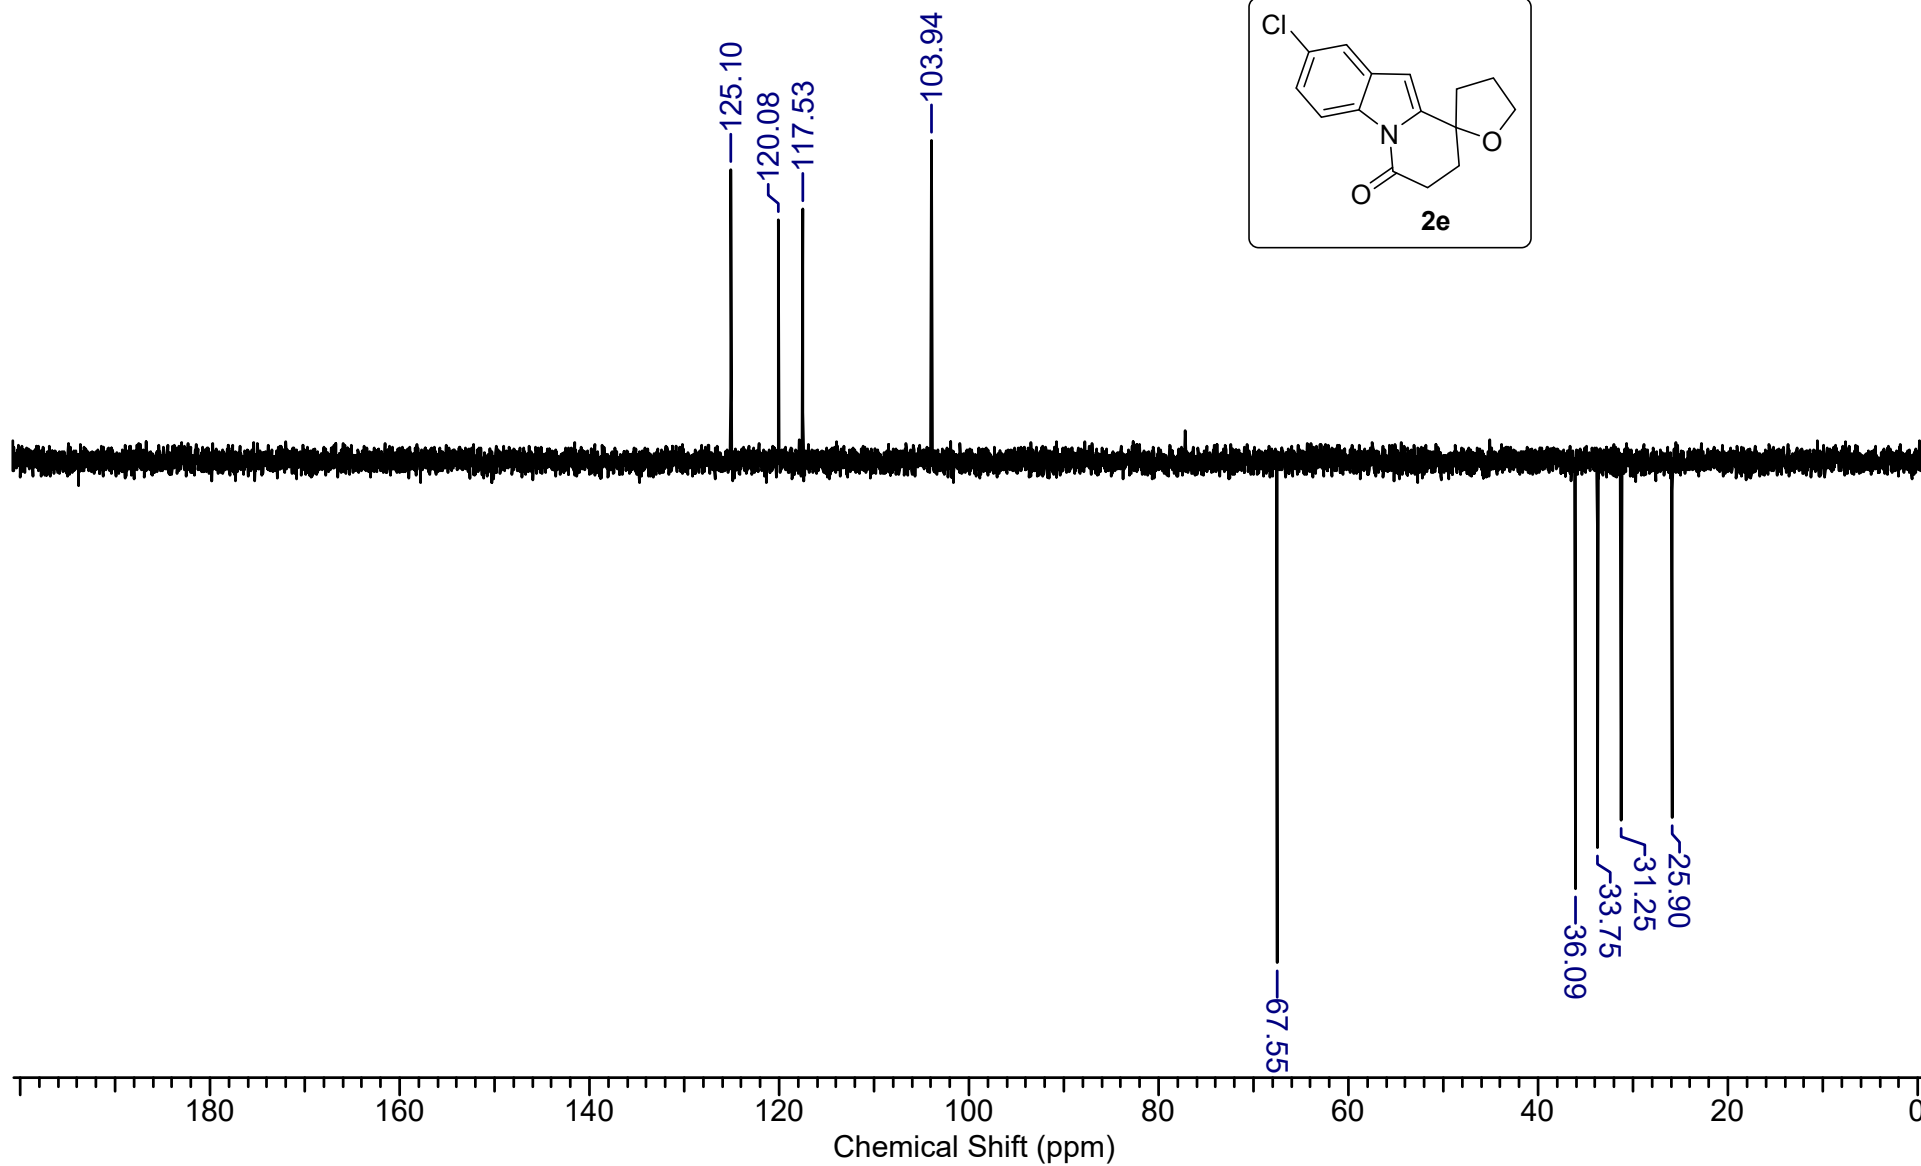

MS-5a #274 RT: 1.47 AV: 1 NL: 4.56E7  
T: FTMS + p ESI Full ms [100.0000-1500.0000]

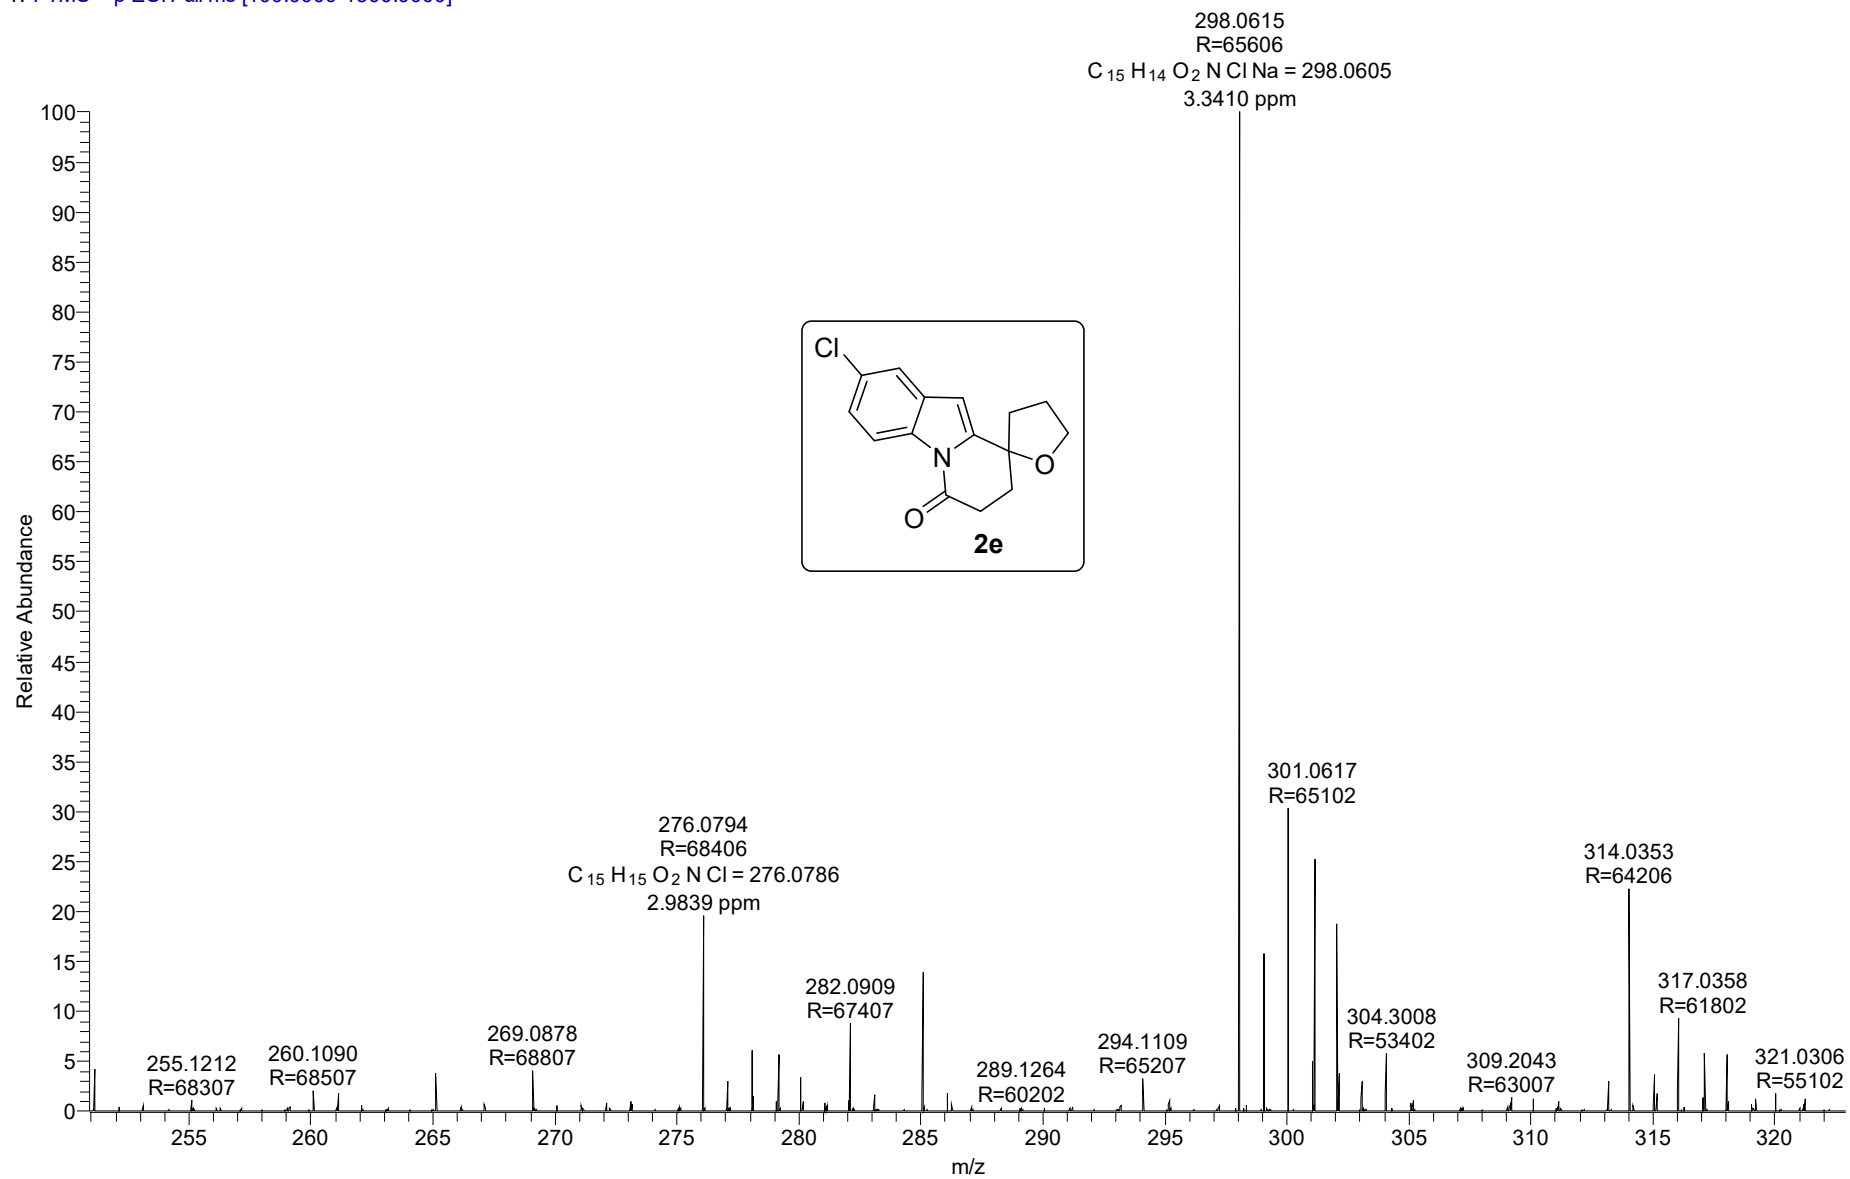

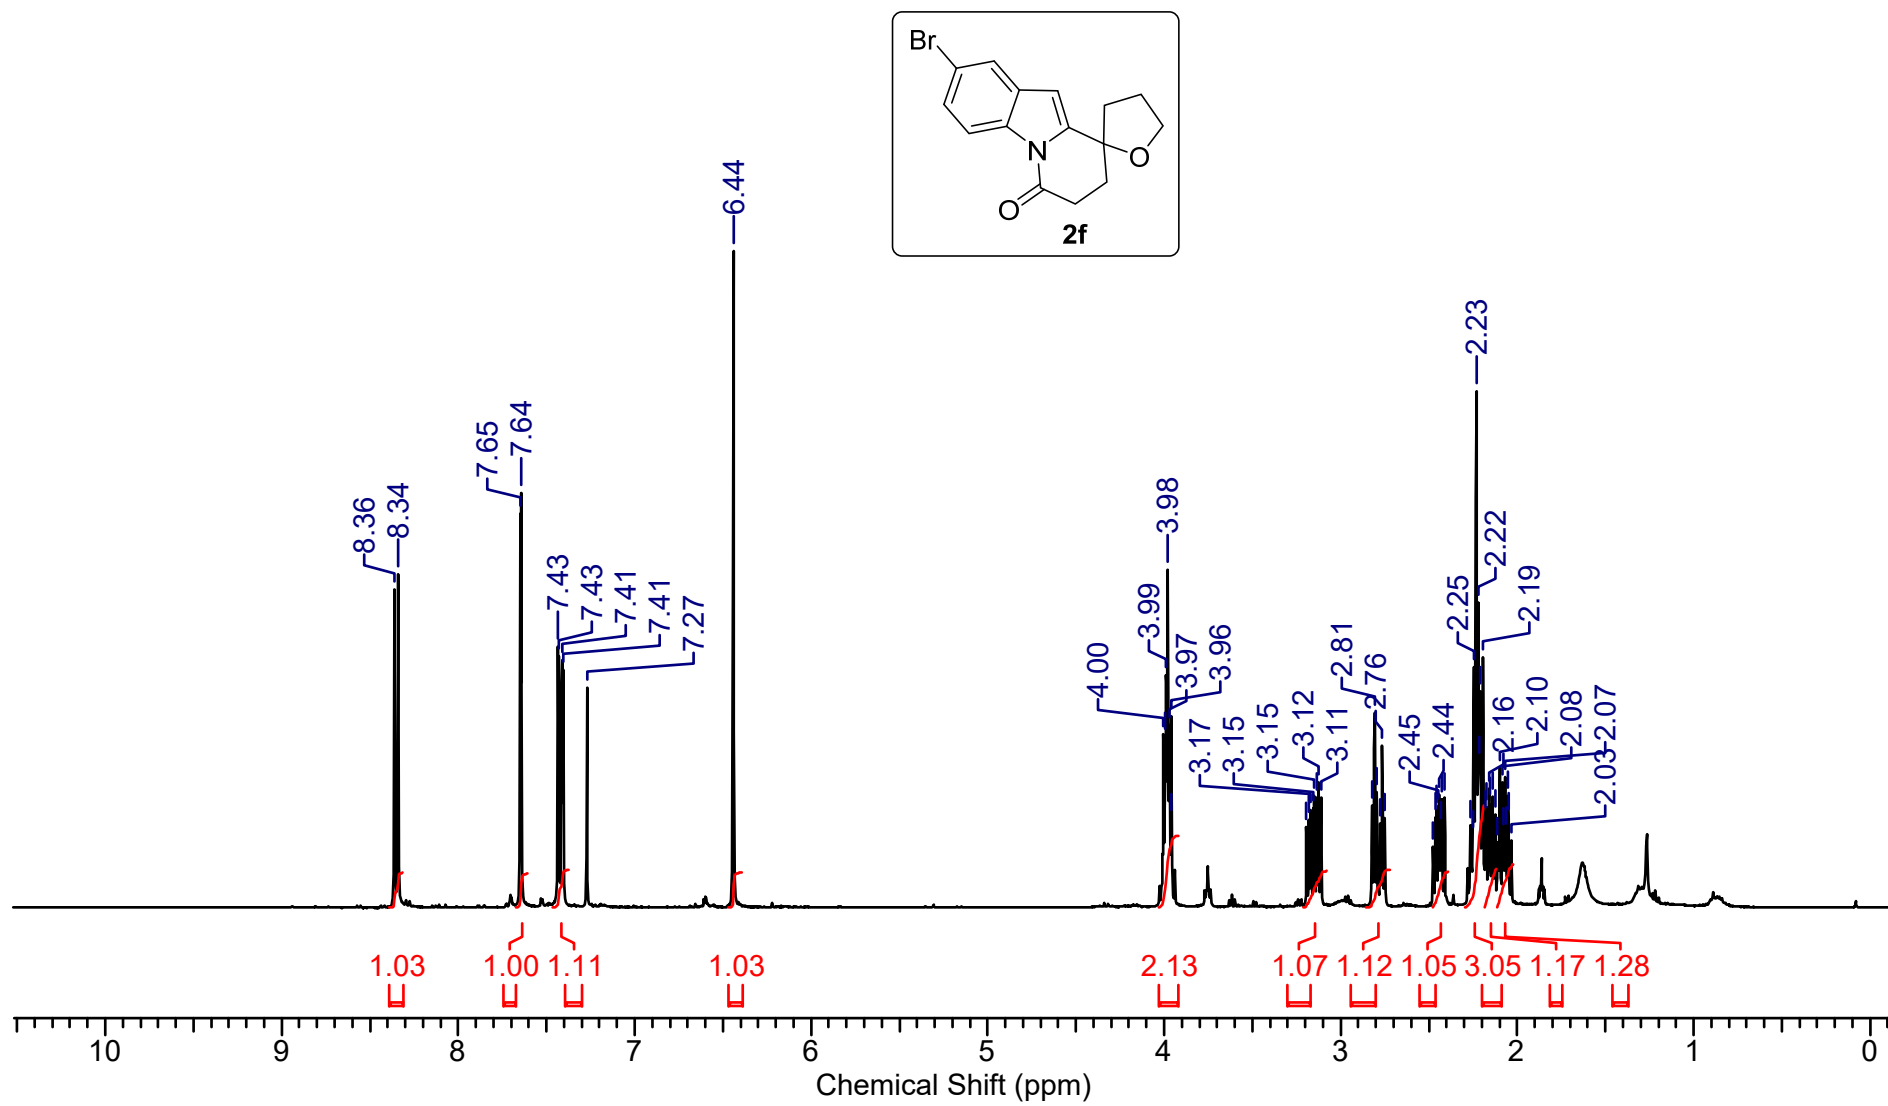

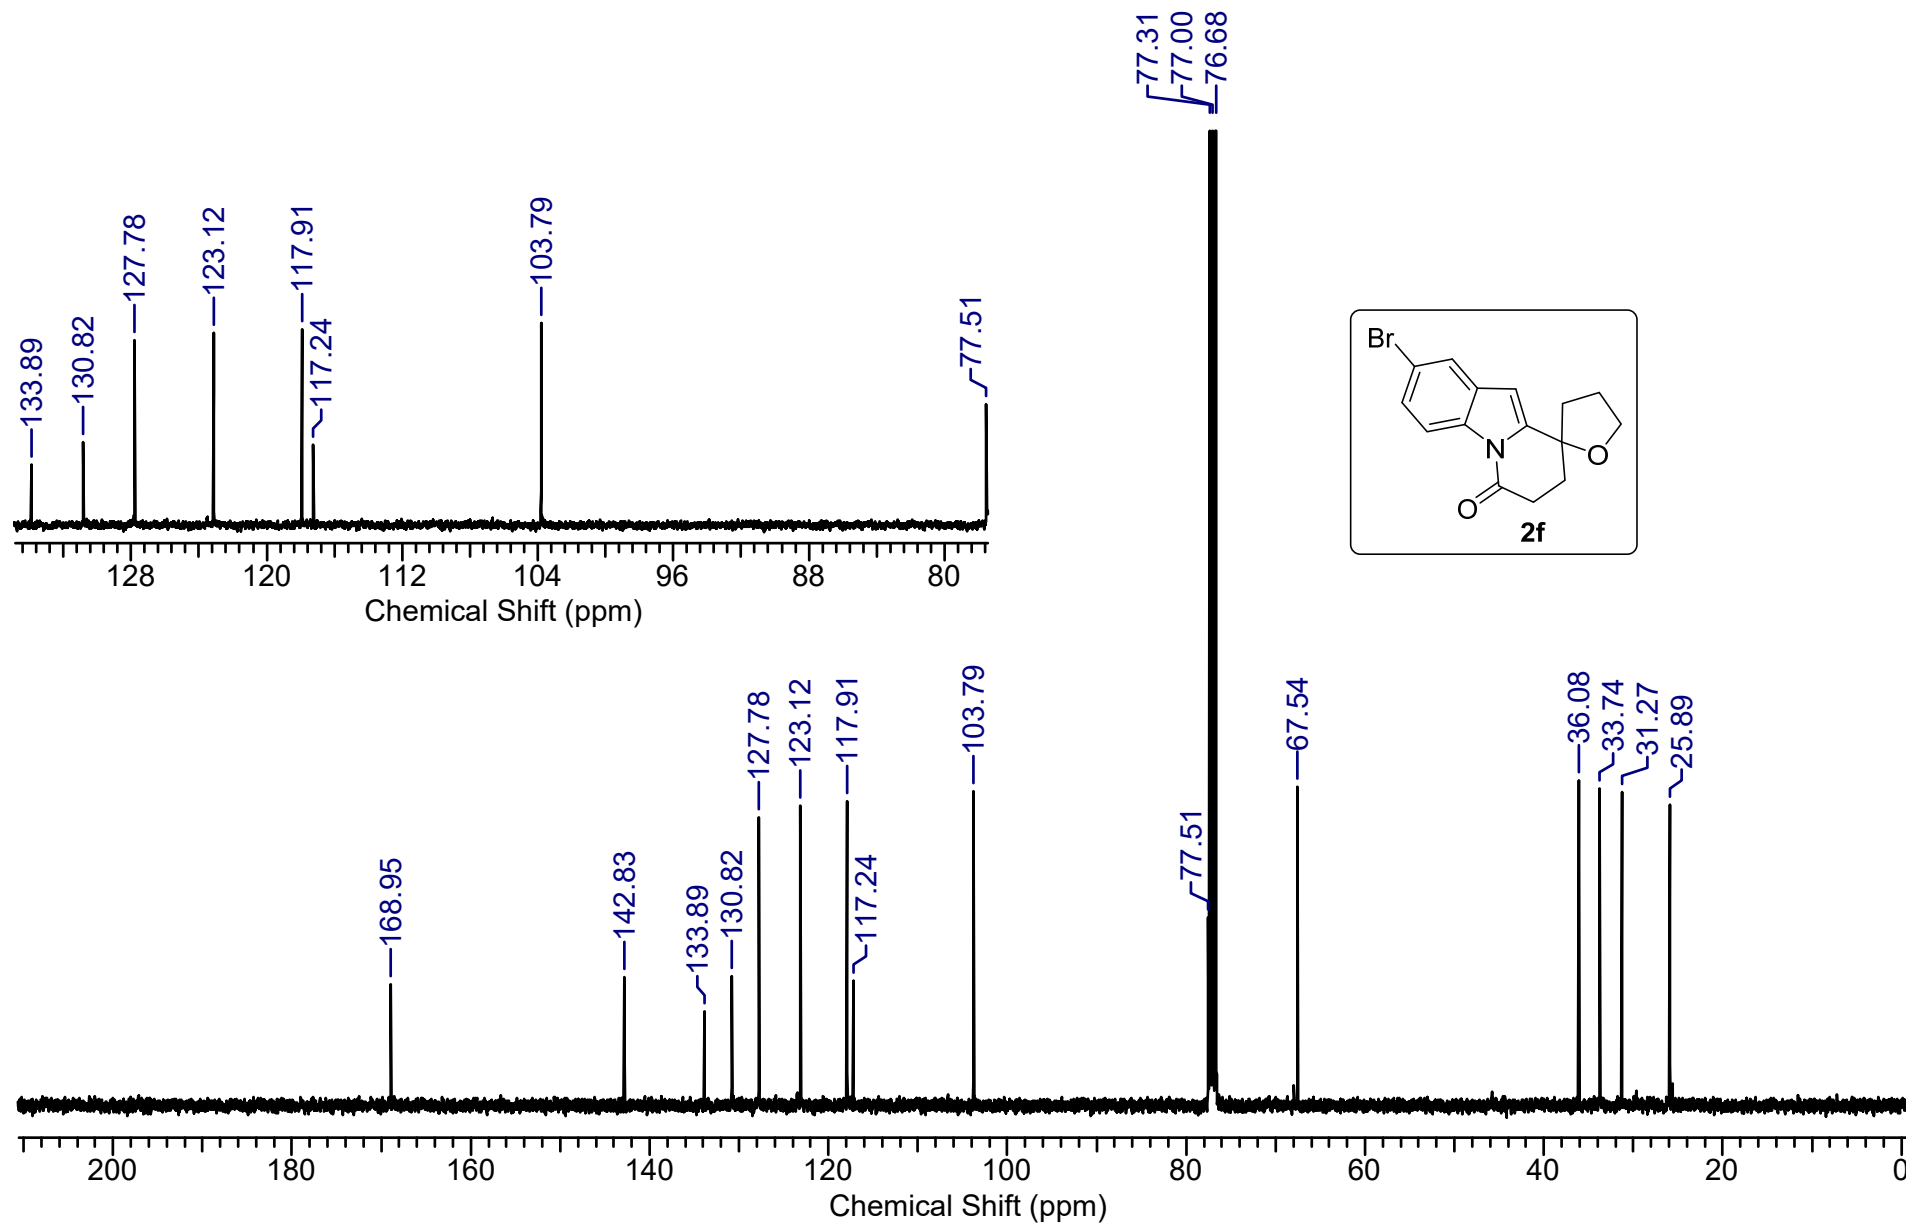

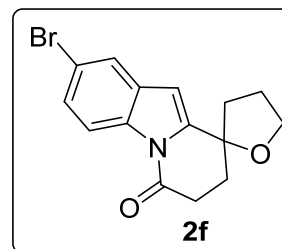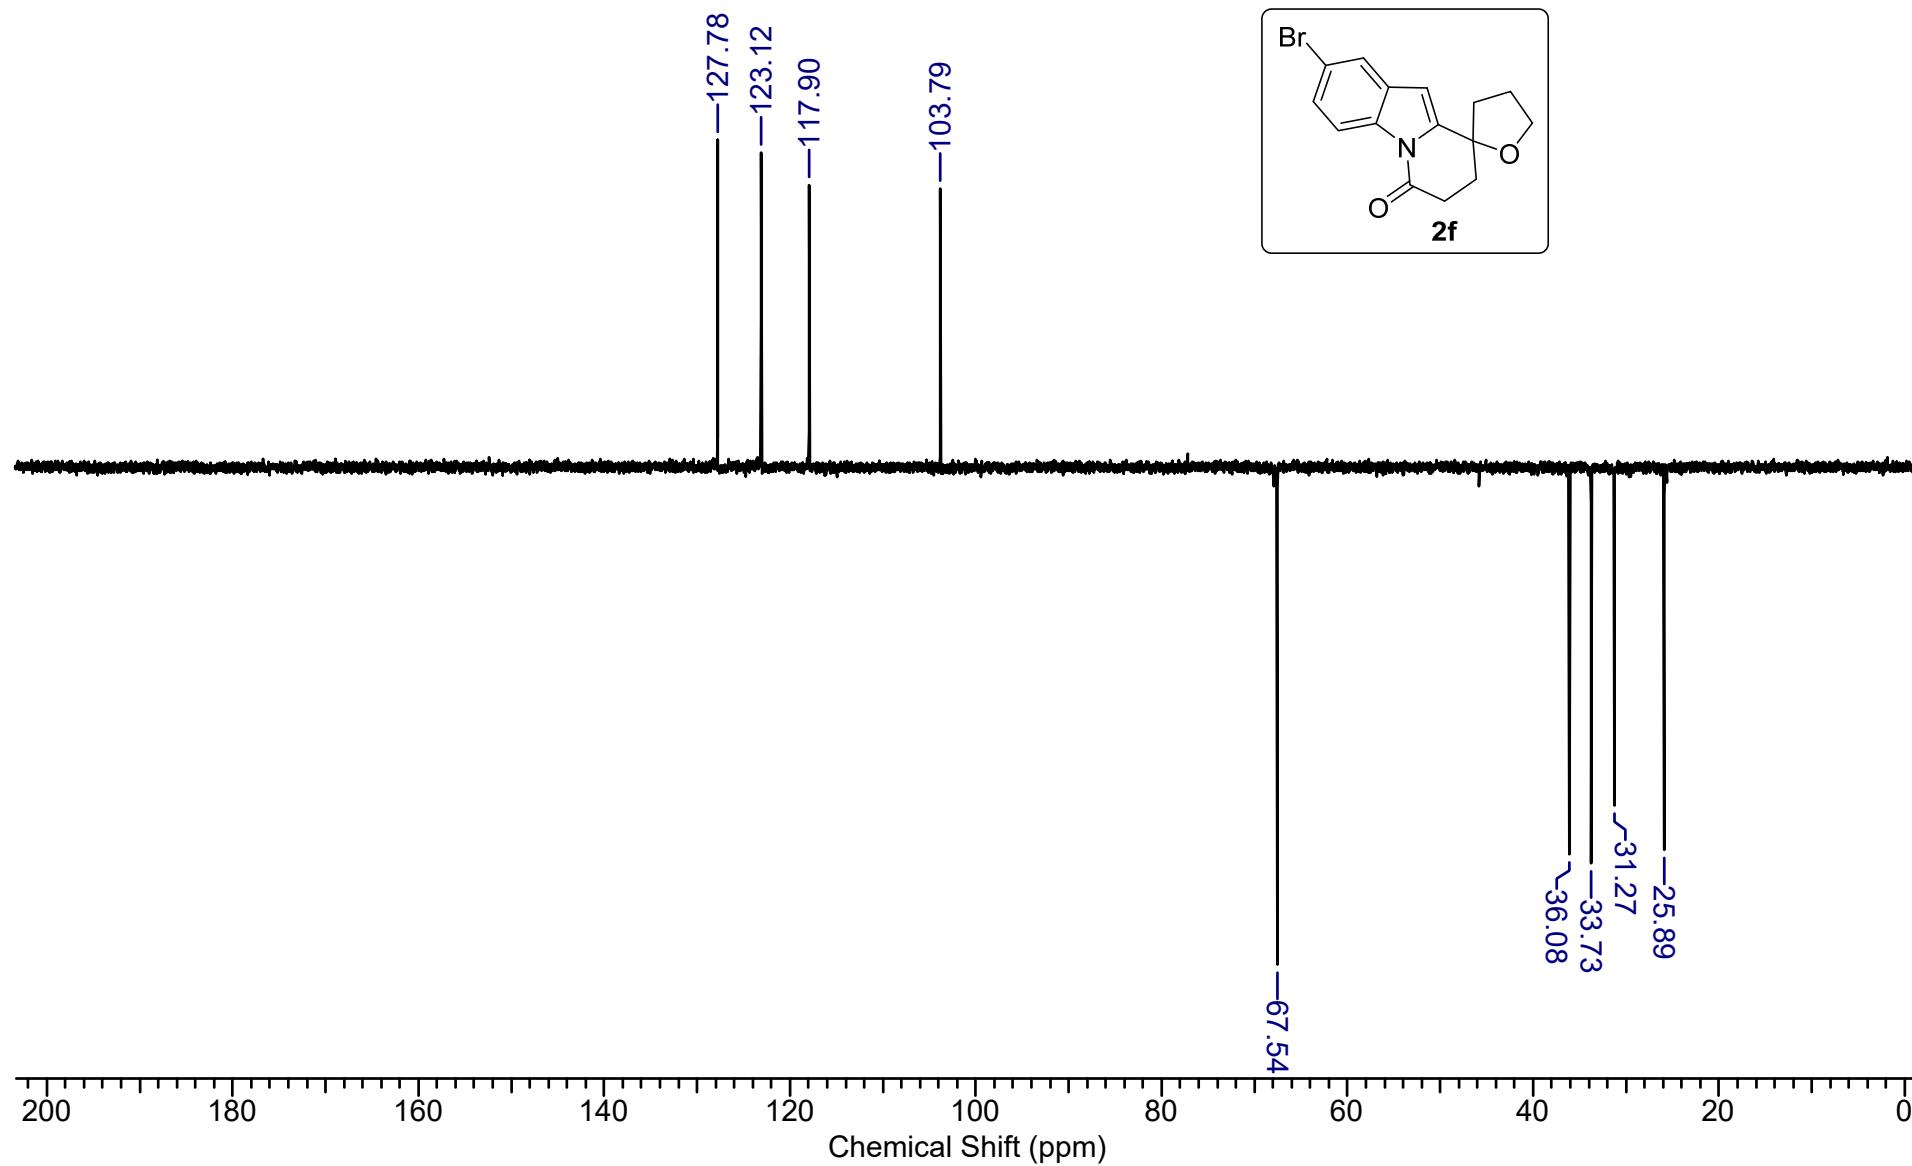

MS-6a #275 RT: 1.47 AV: 1 NL: 2.85E7  
T: FTMS + p ESI Full ms [100.0000-1500.0000]

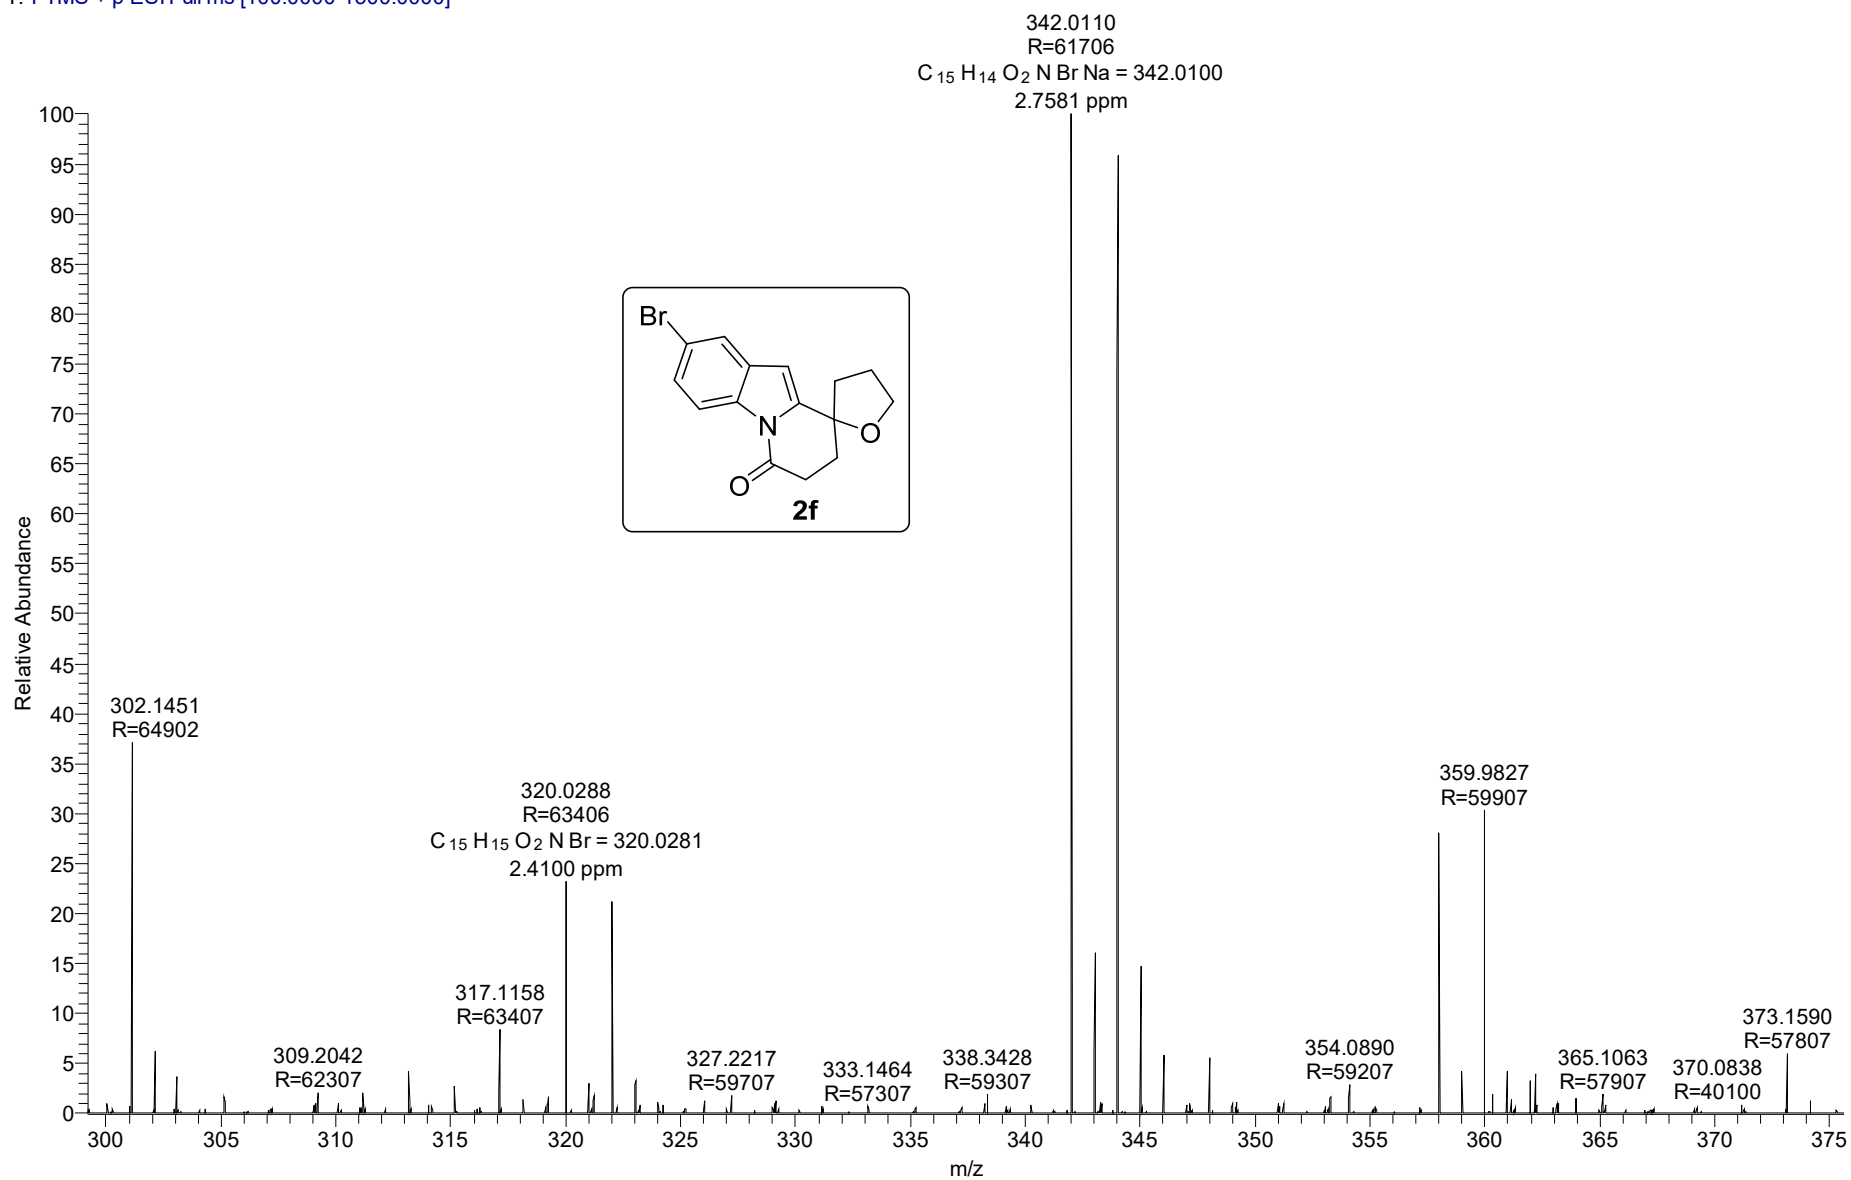



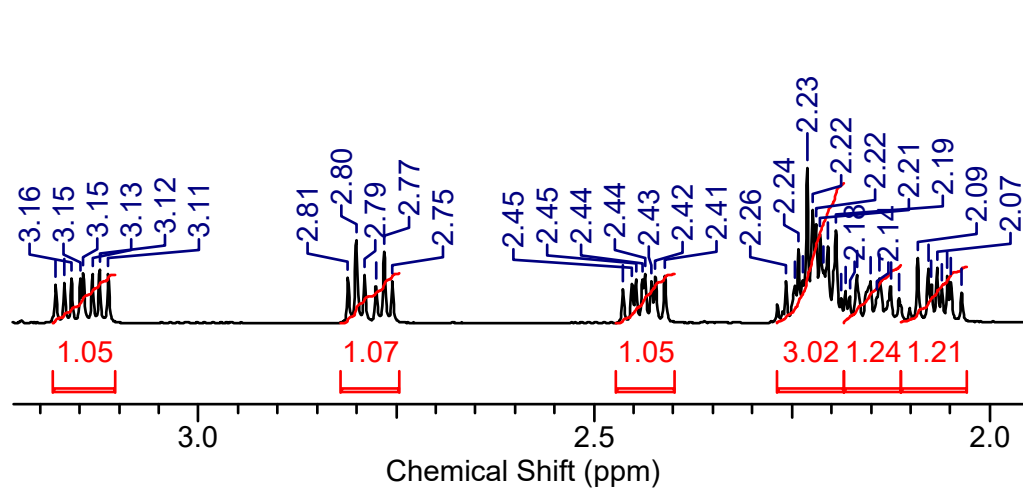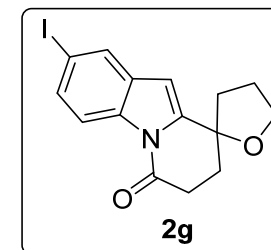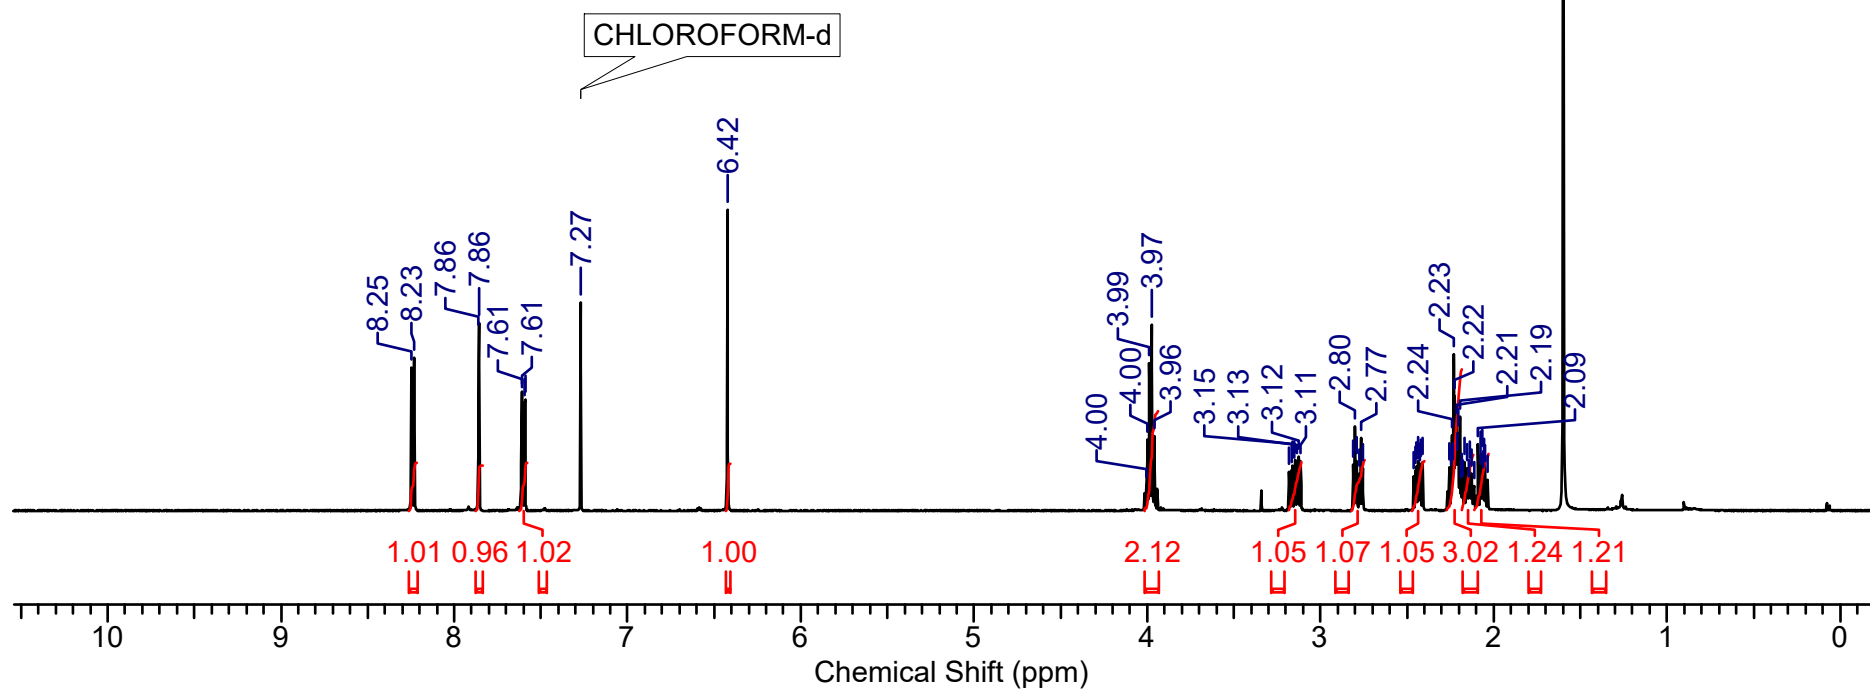

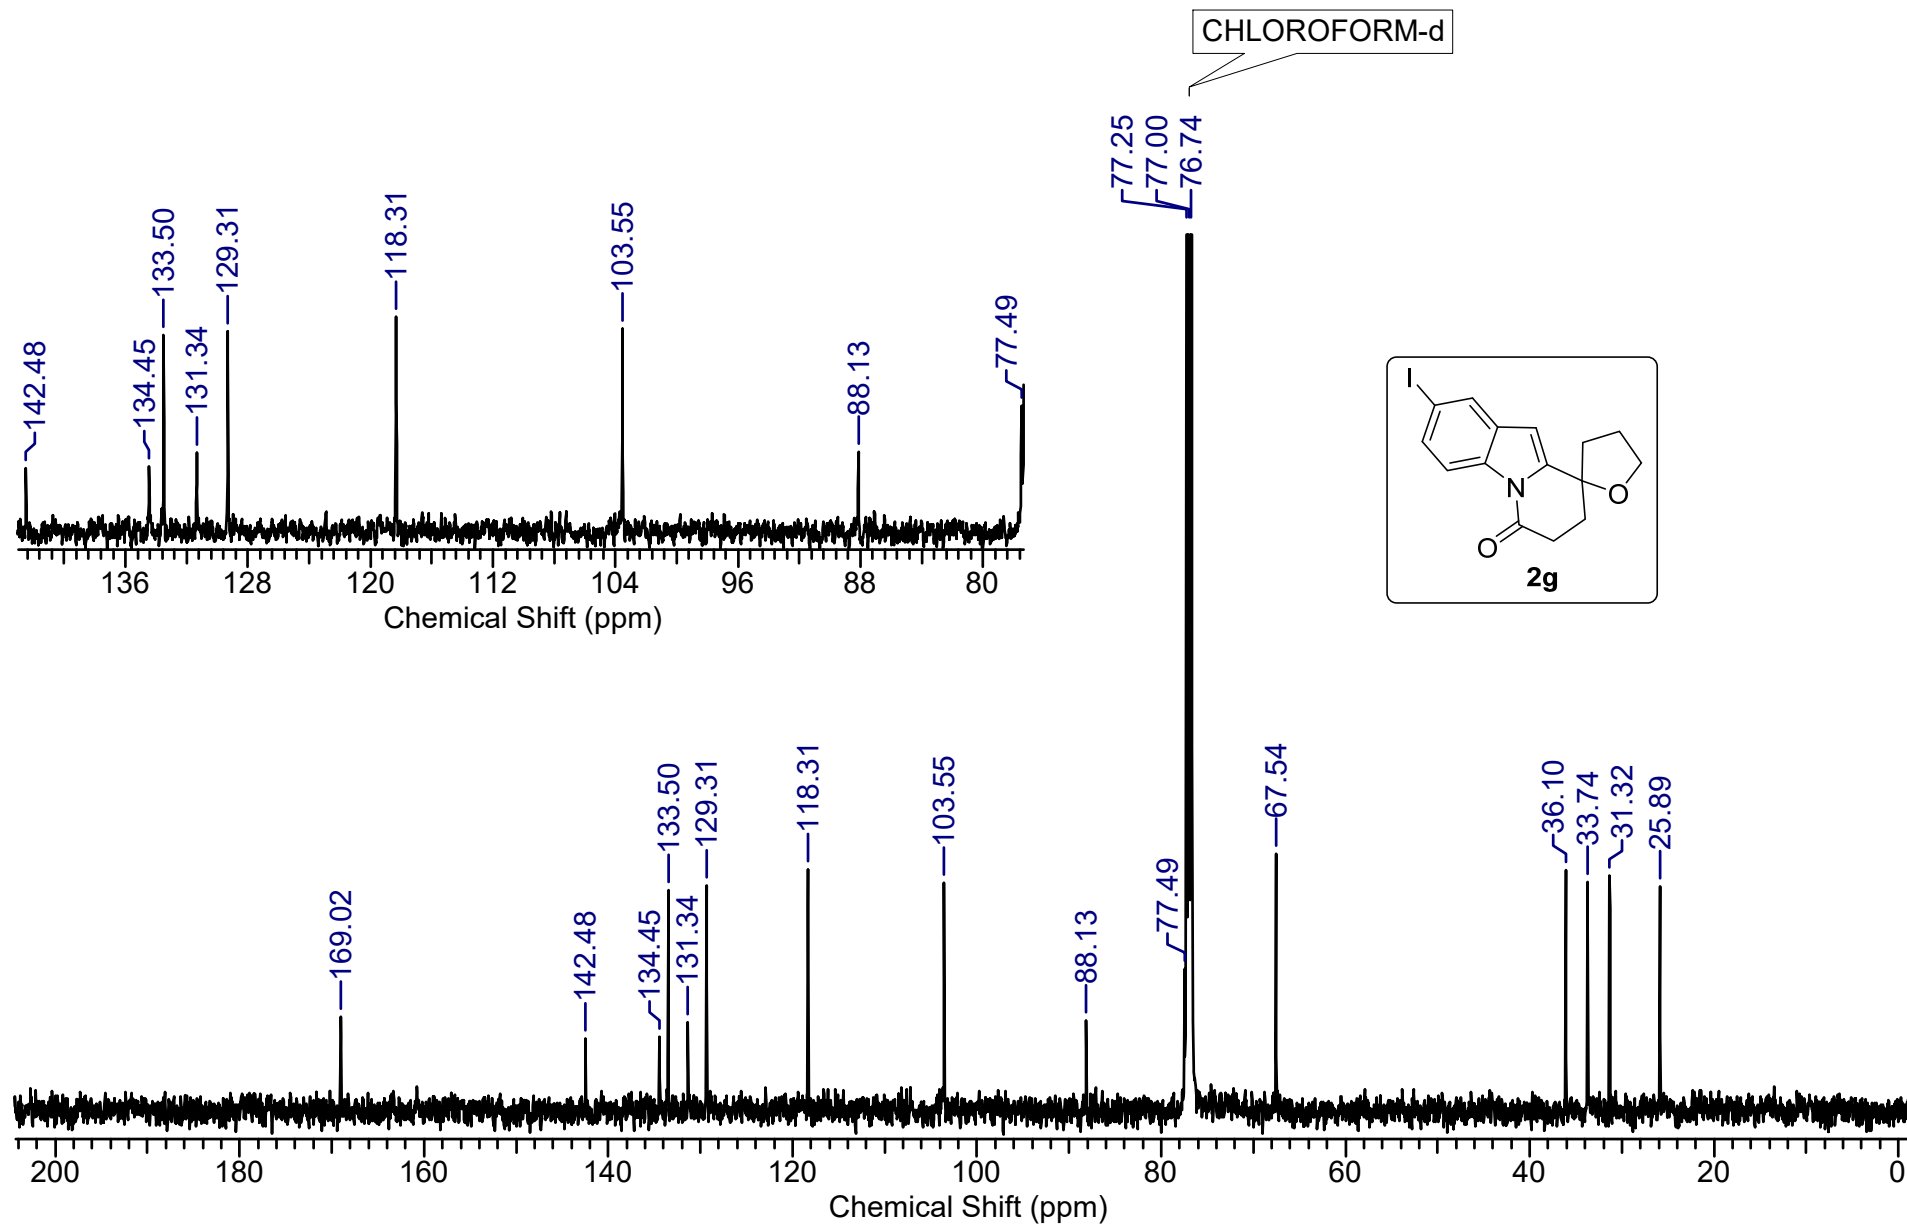

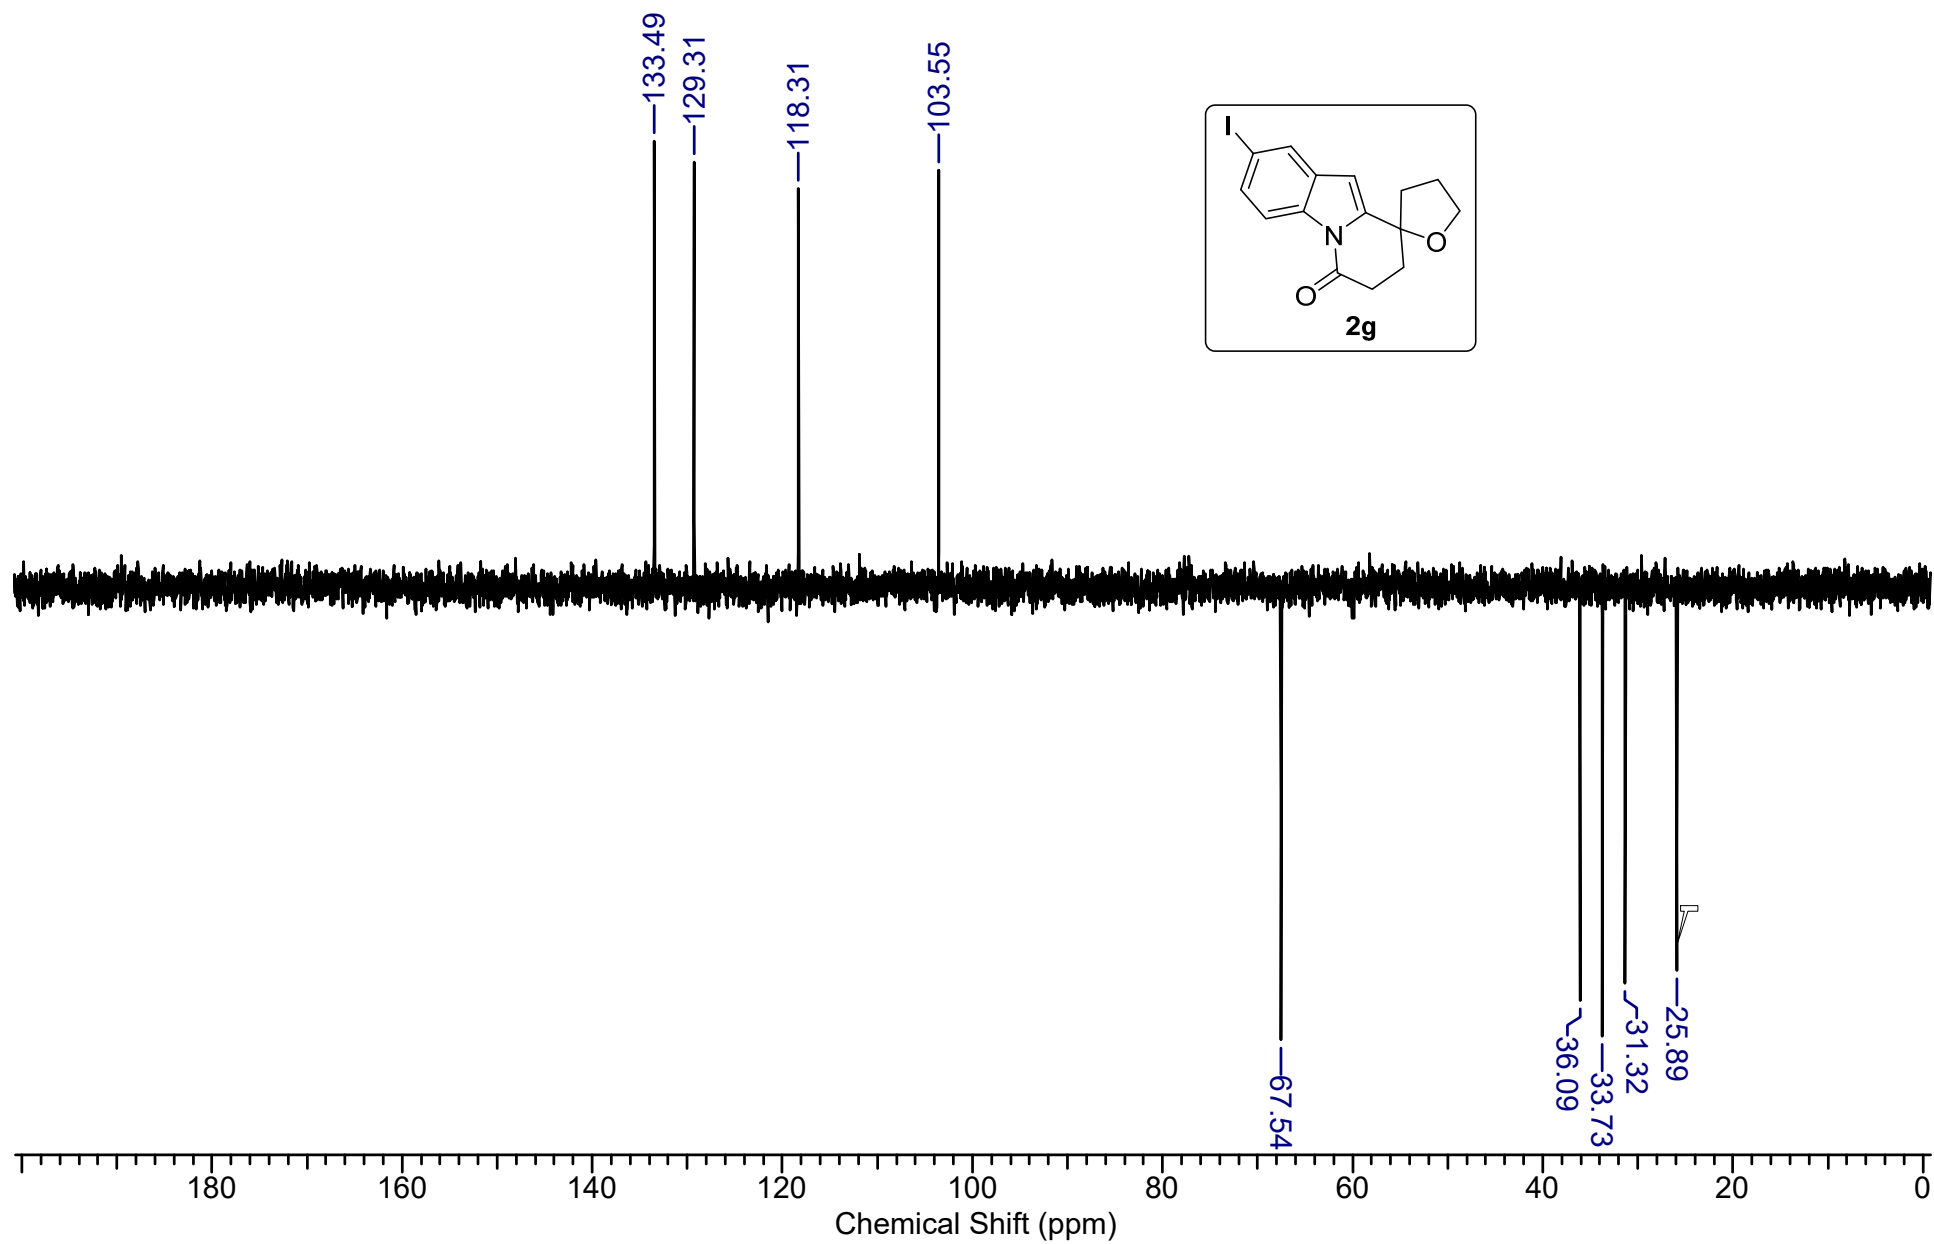

MS-7a #327 RT: 1.75 AV: 1 NL: 5.81E5  
T: FTMS + p ESIFull ms [100.0000-1500.0000]

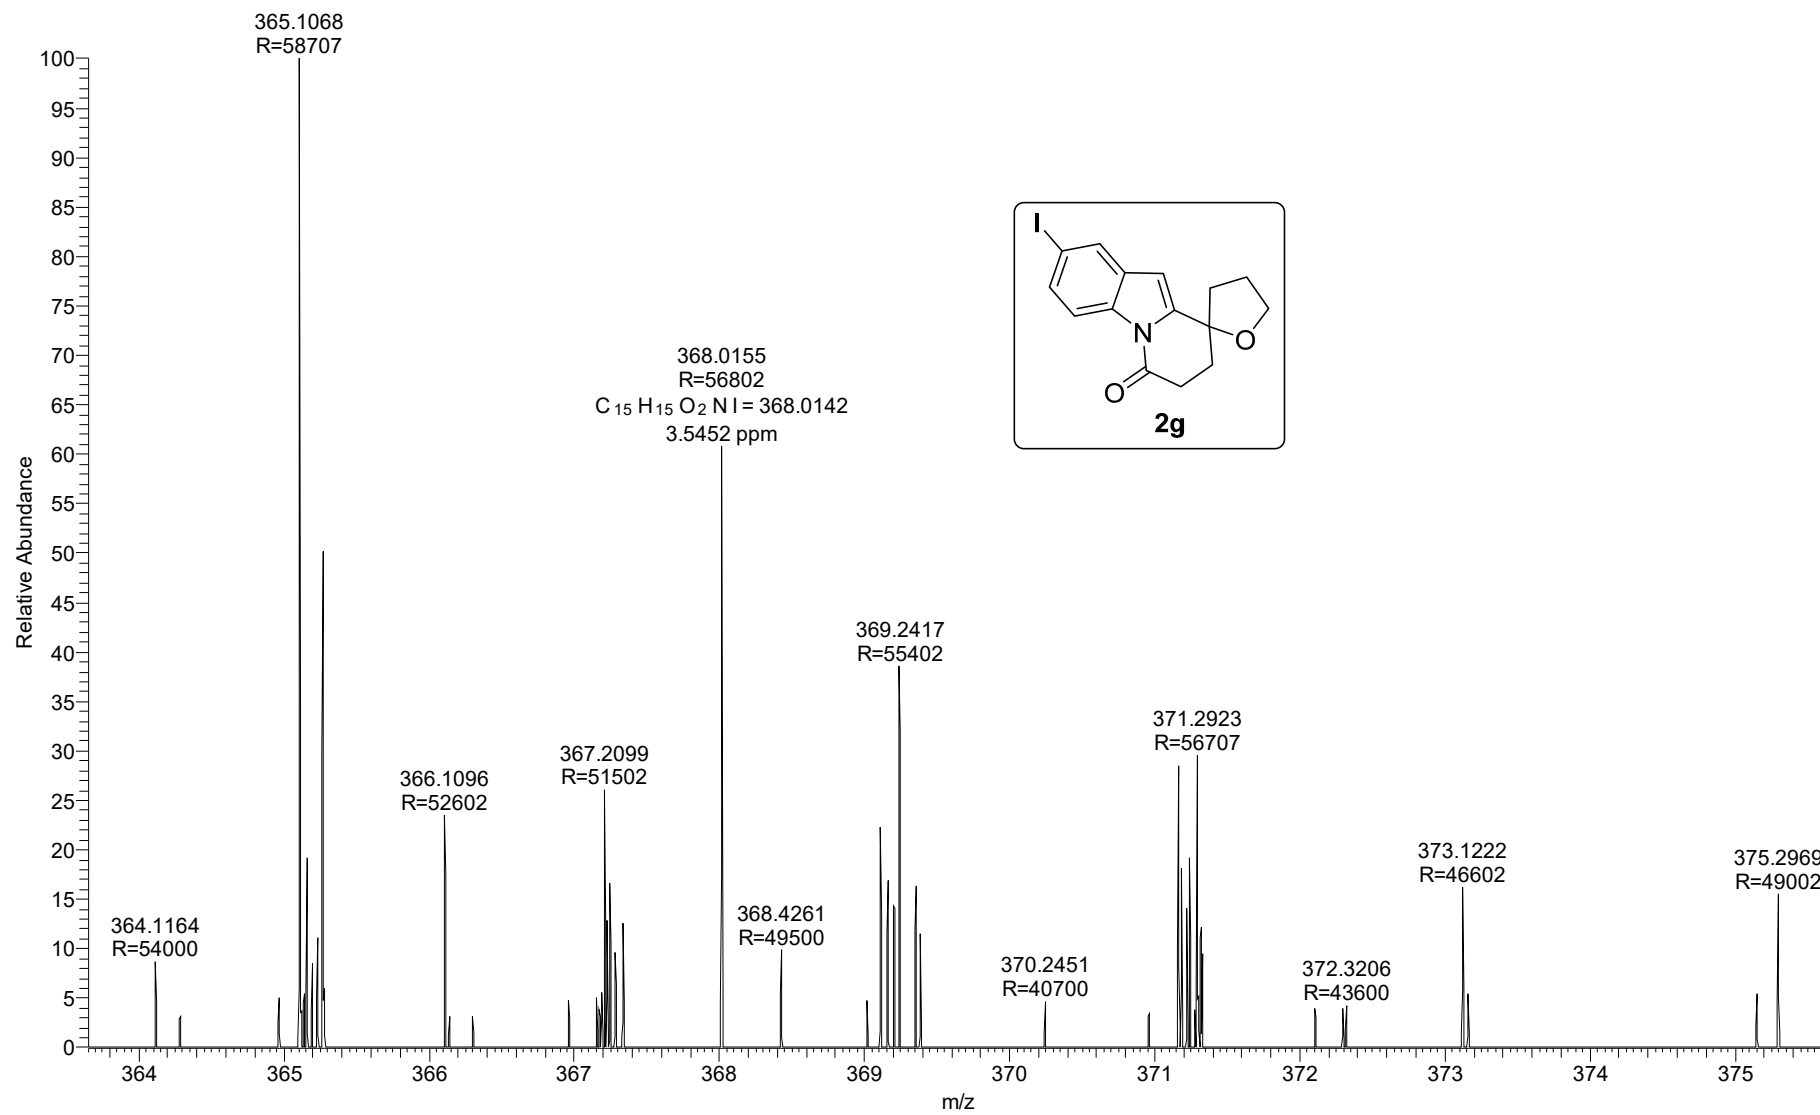

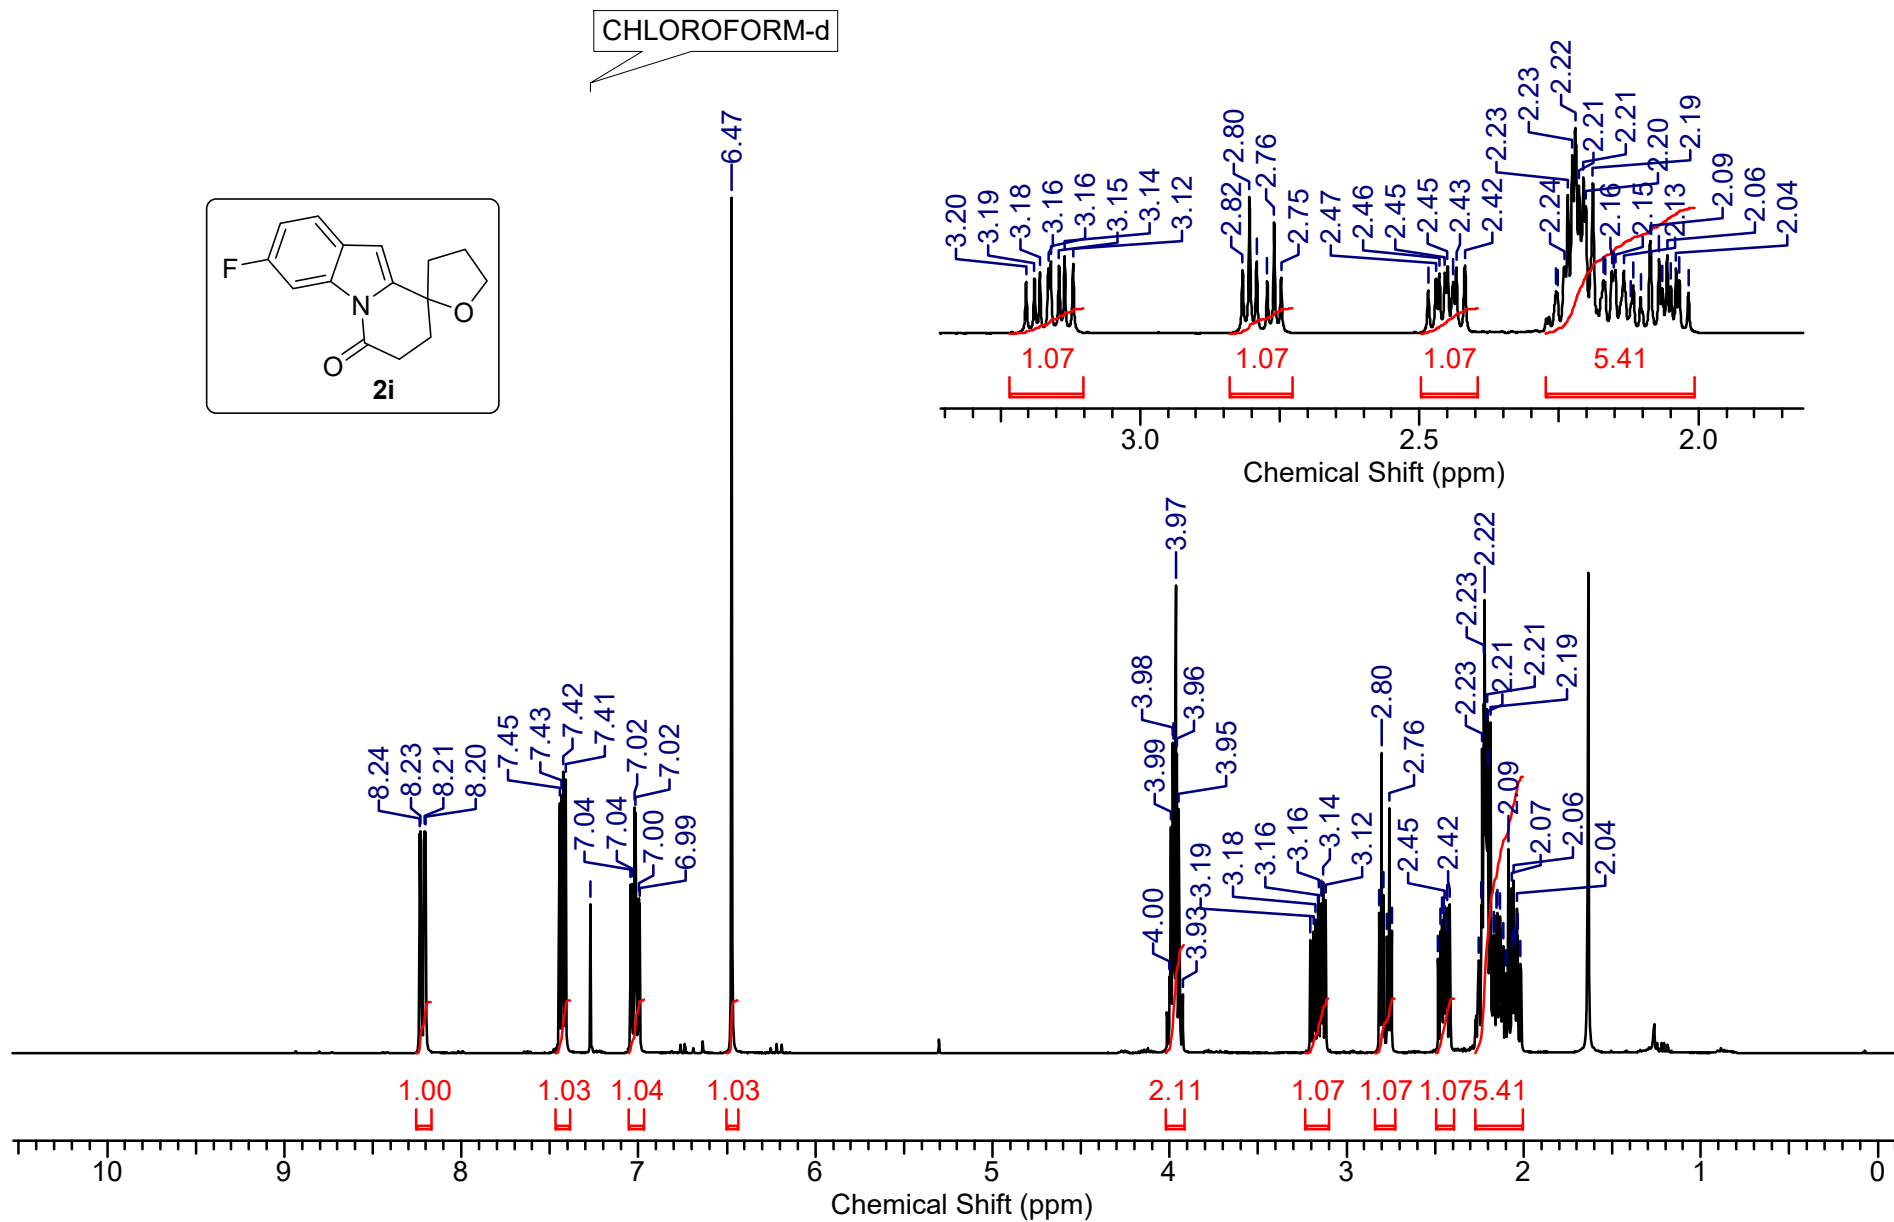

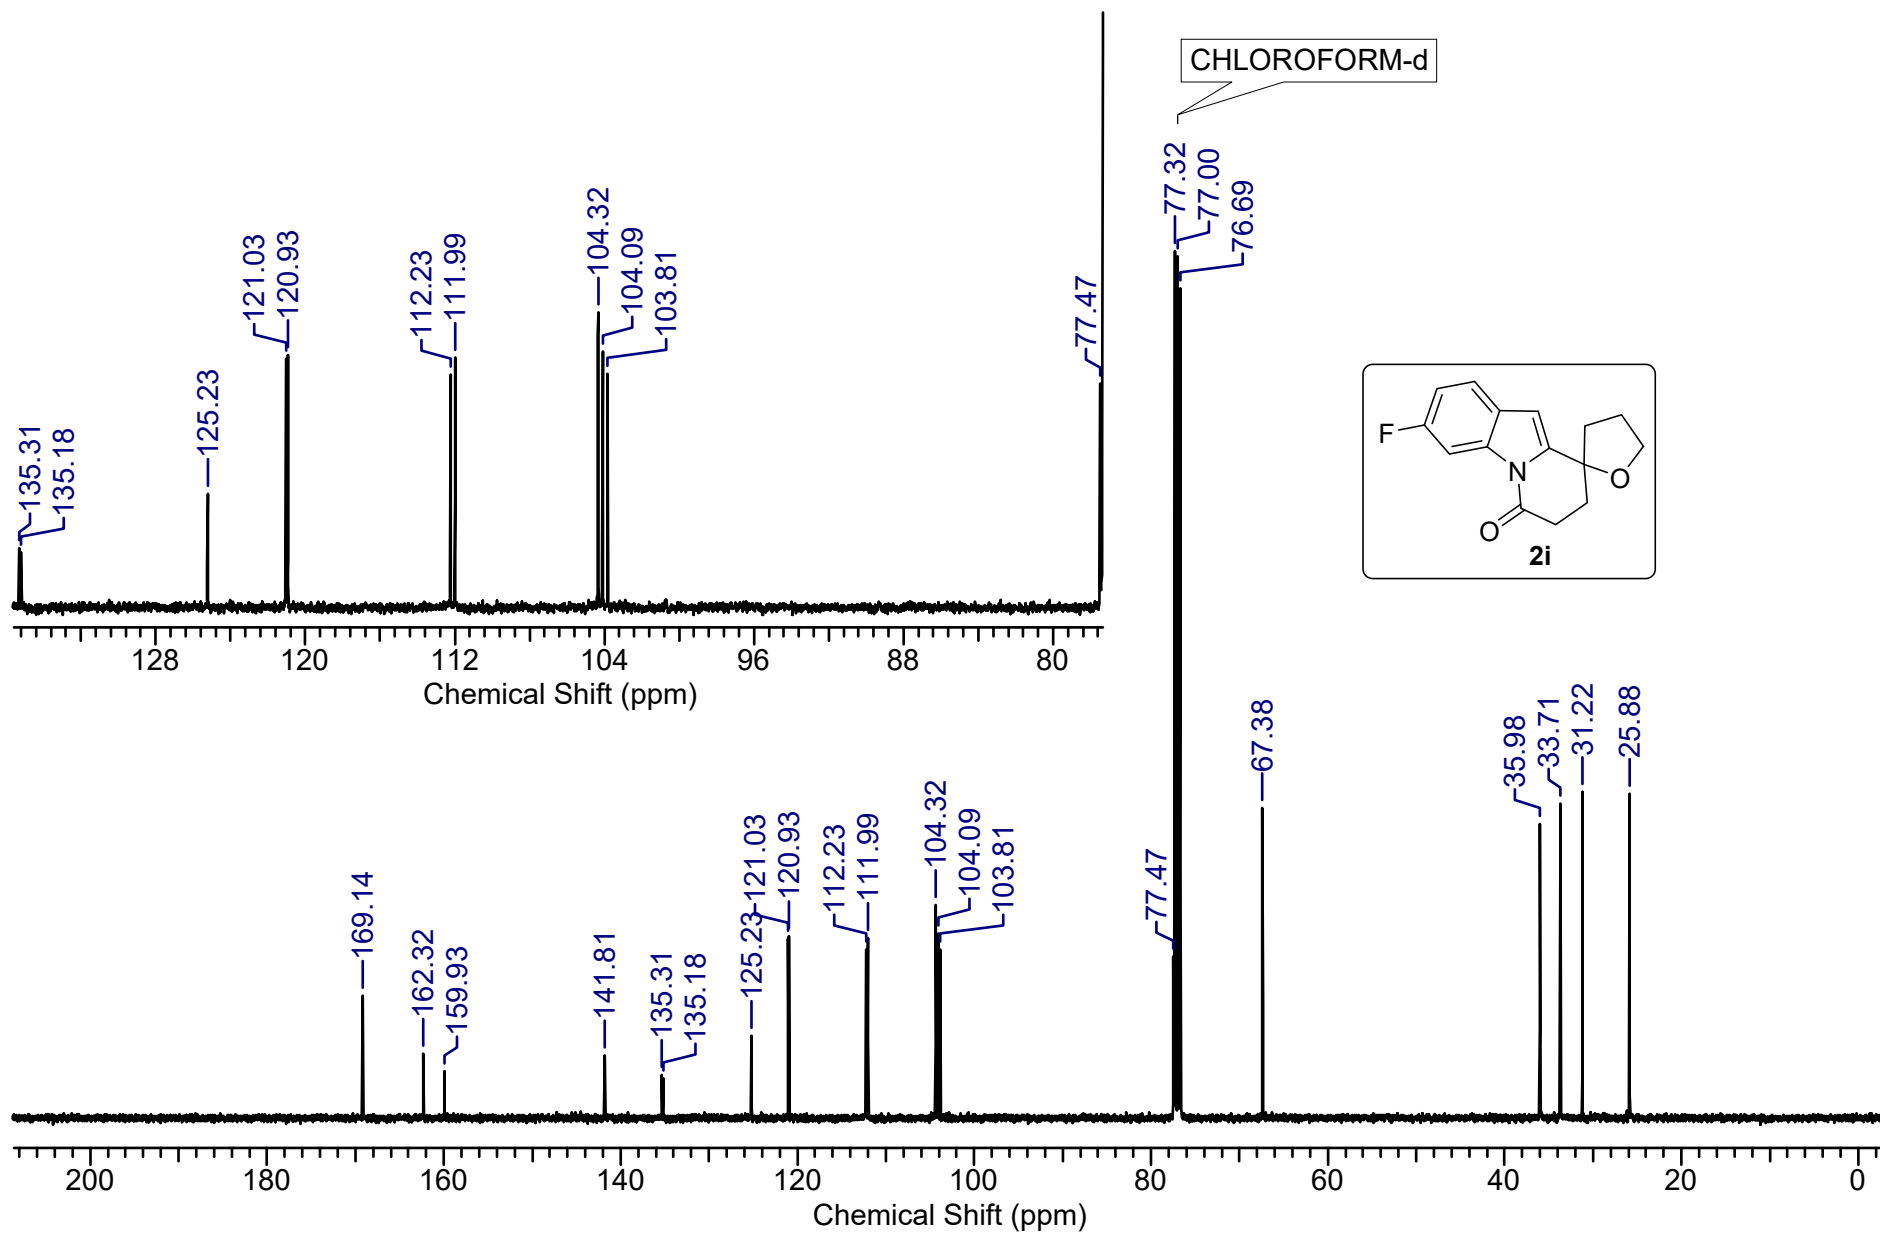

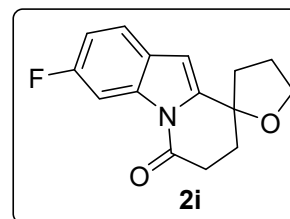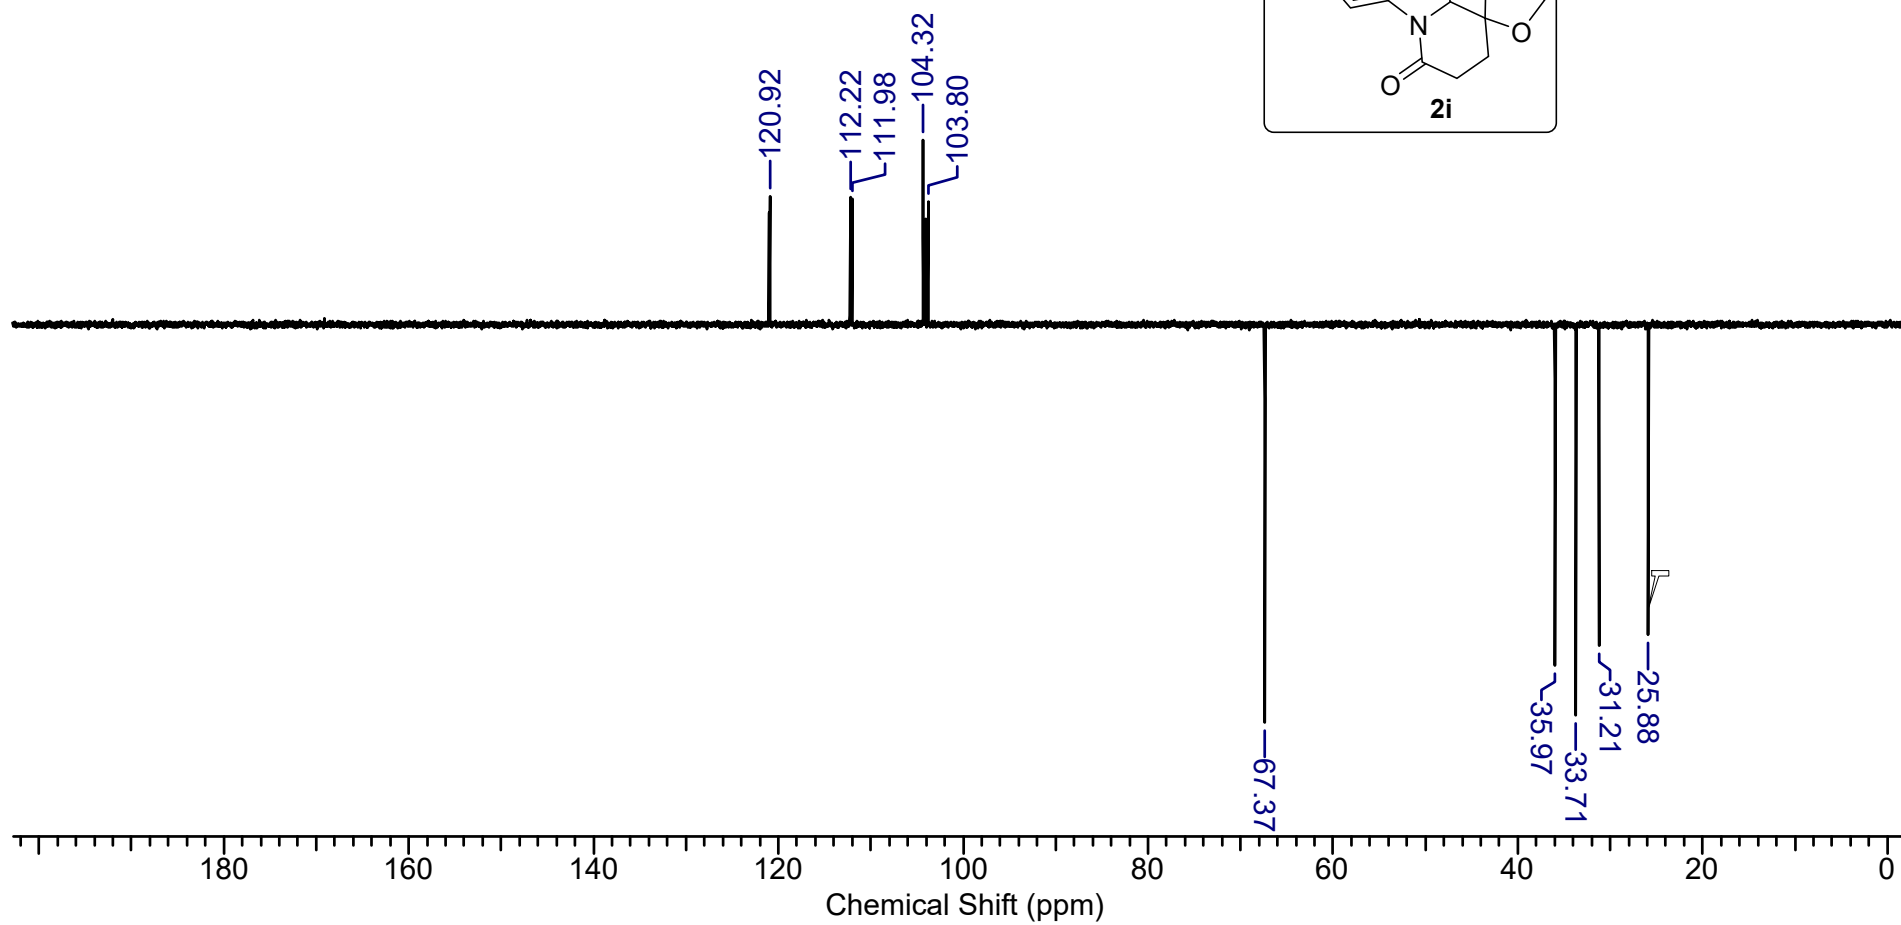

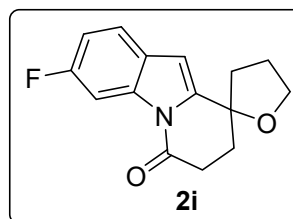

-116.47

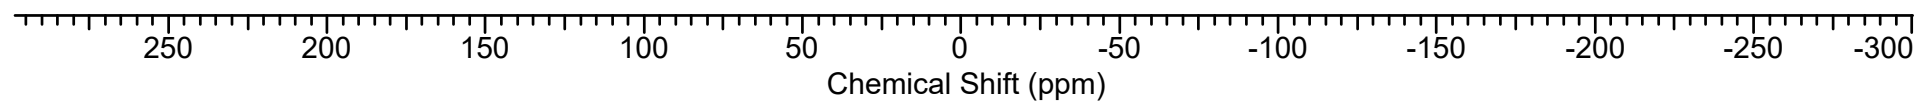



MSH-43 #275 RT: 1.50 AV: 1 NL: 1.11E9  
T: FTMS + p ESI Full ms [100.0000-1500.0000]

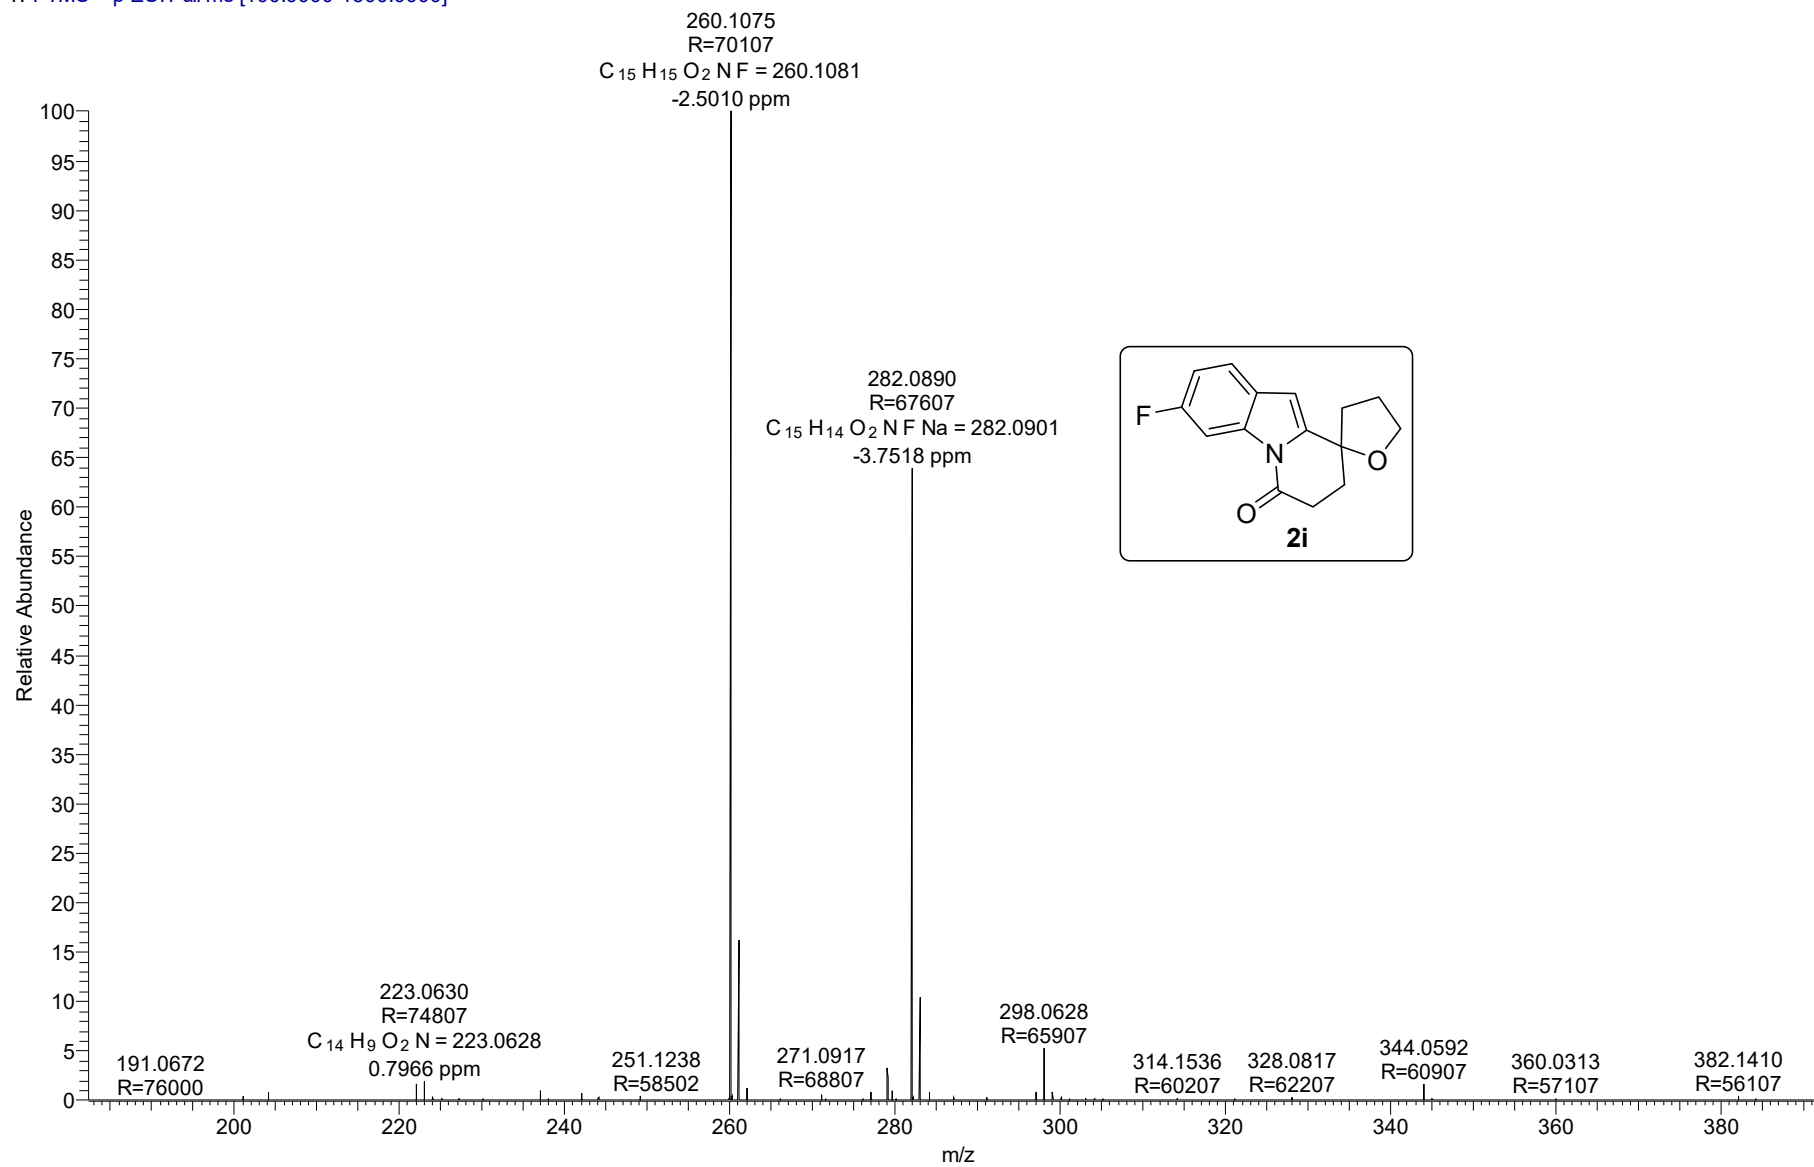

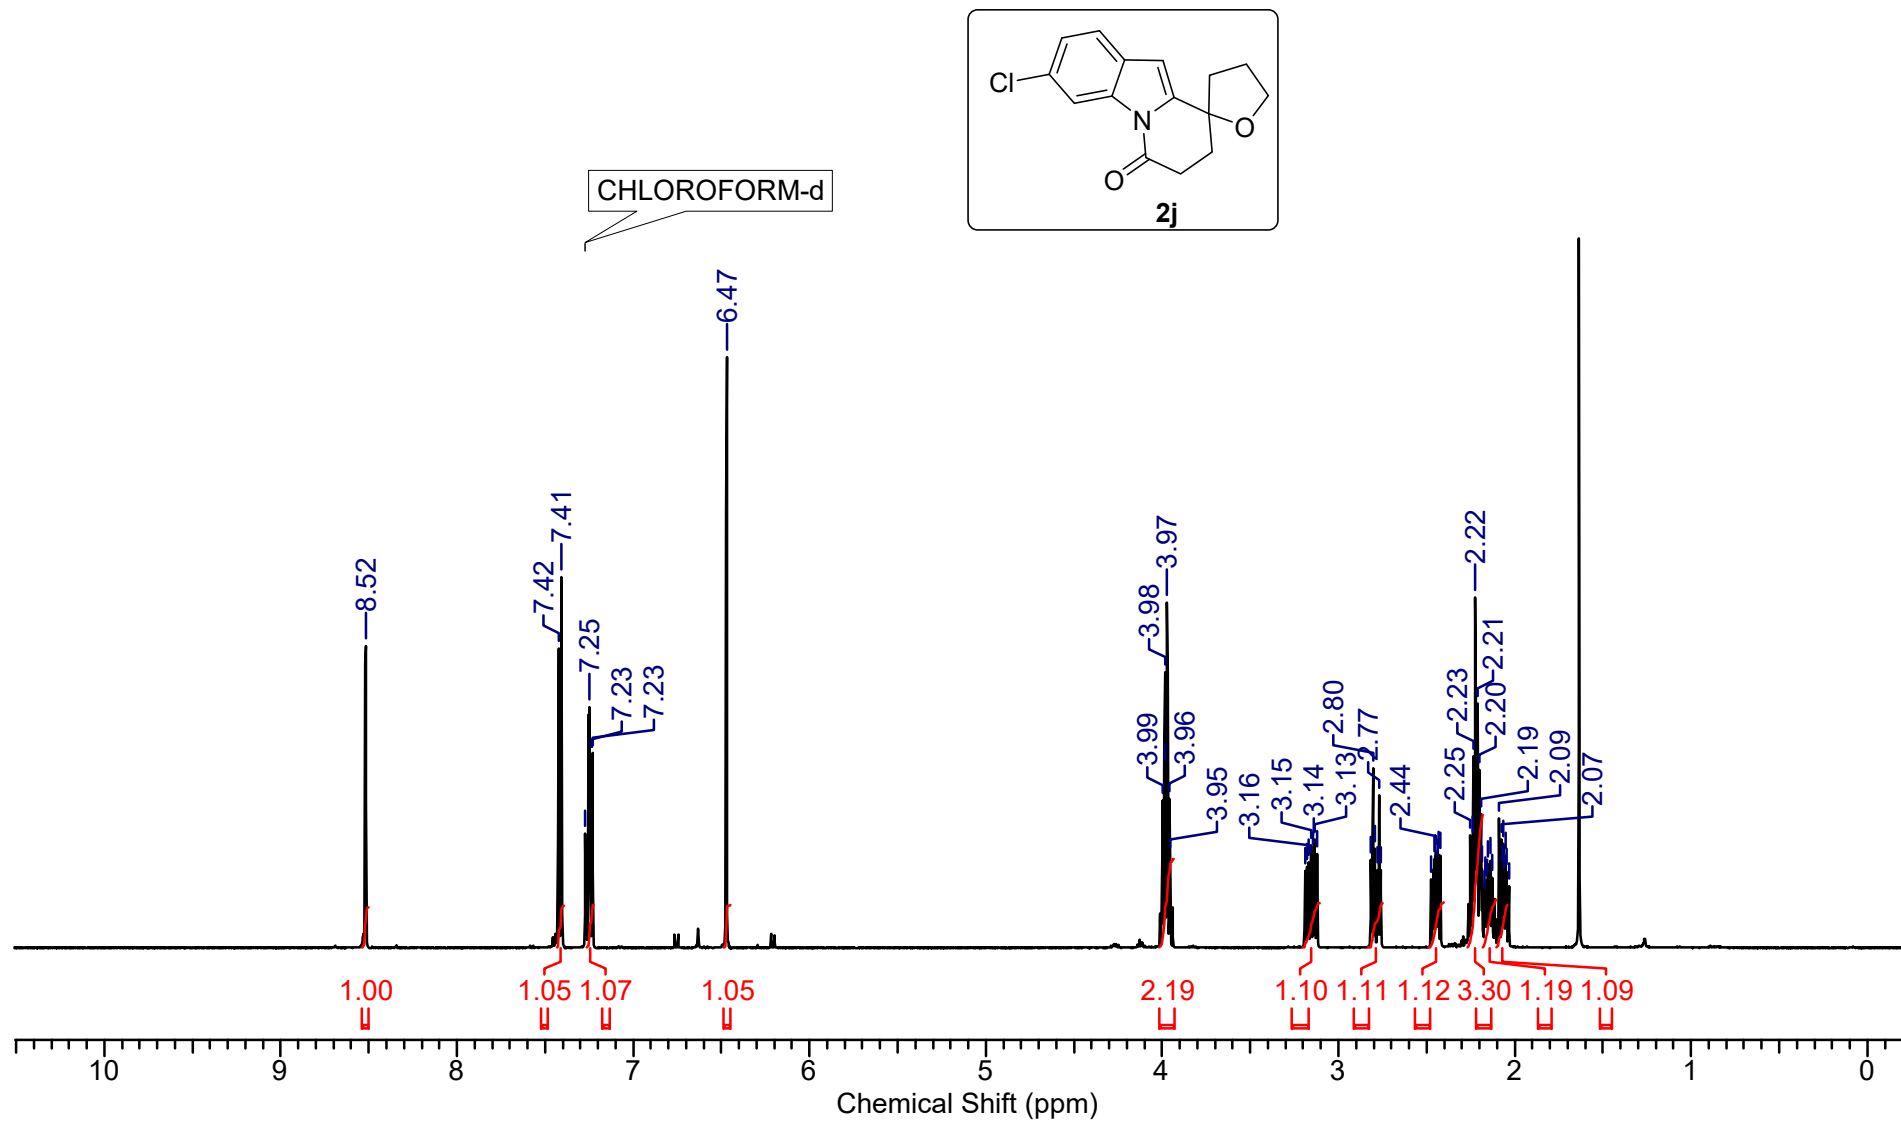

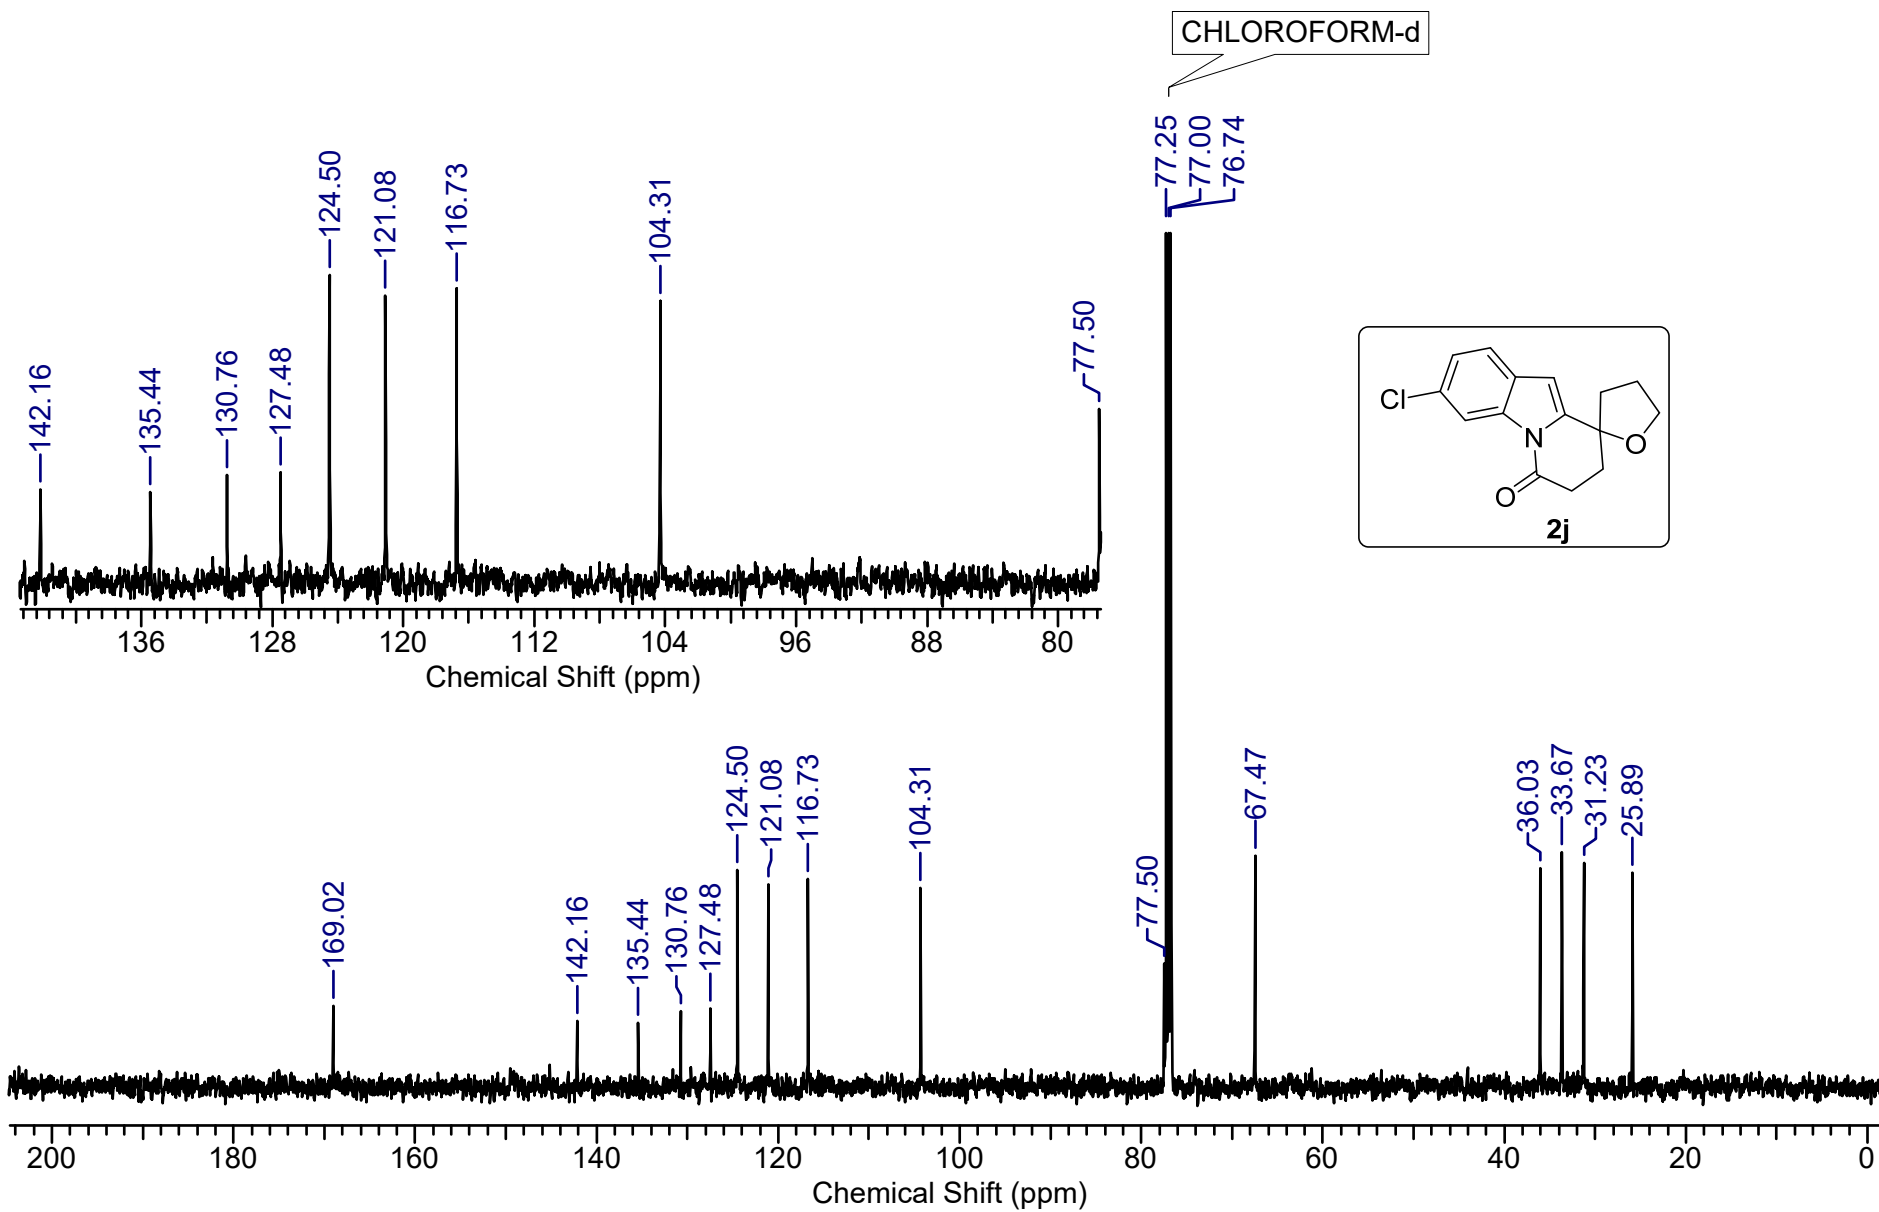

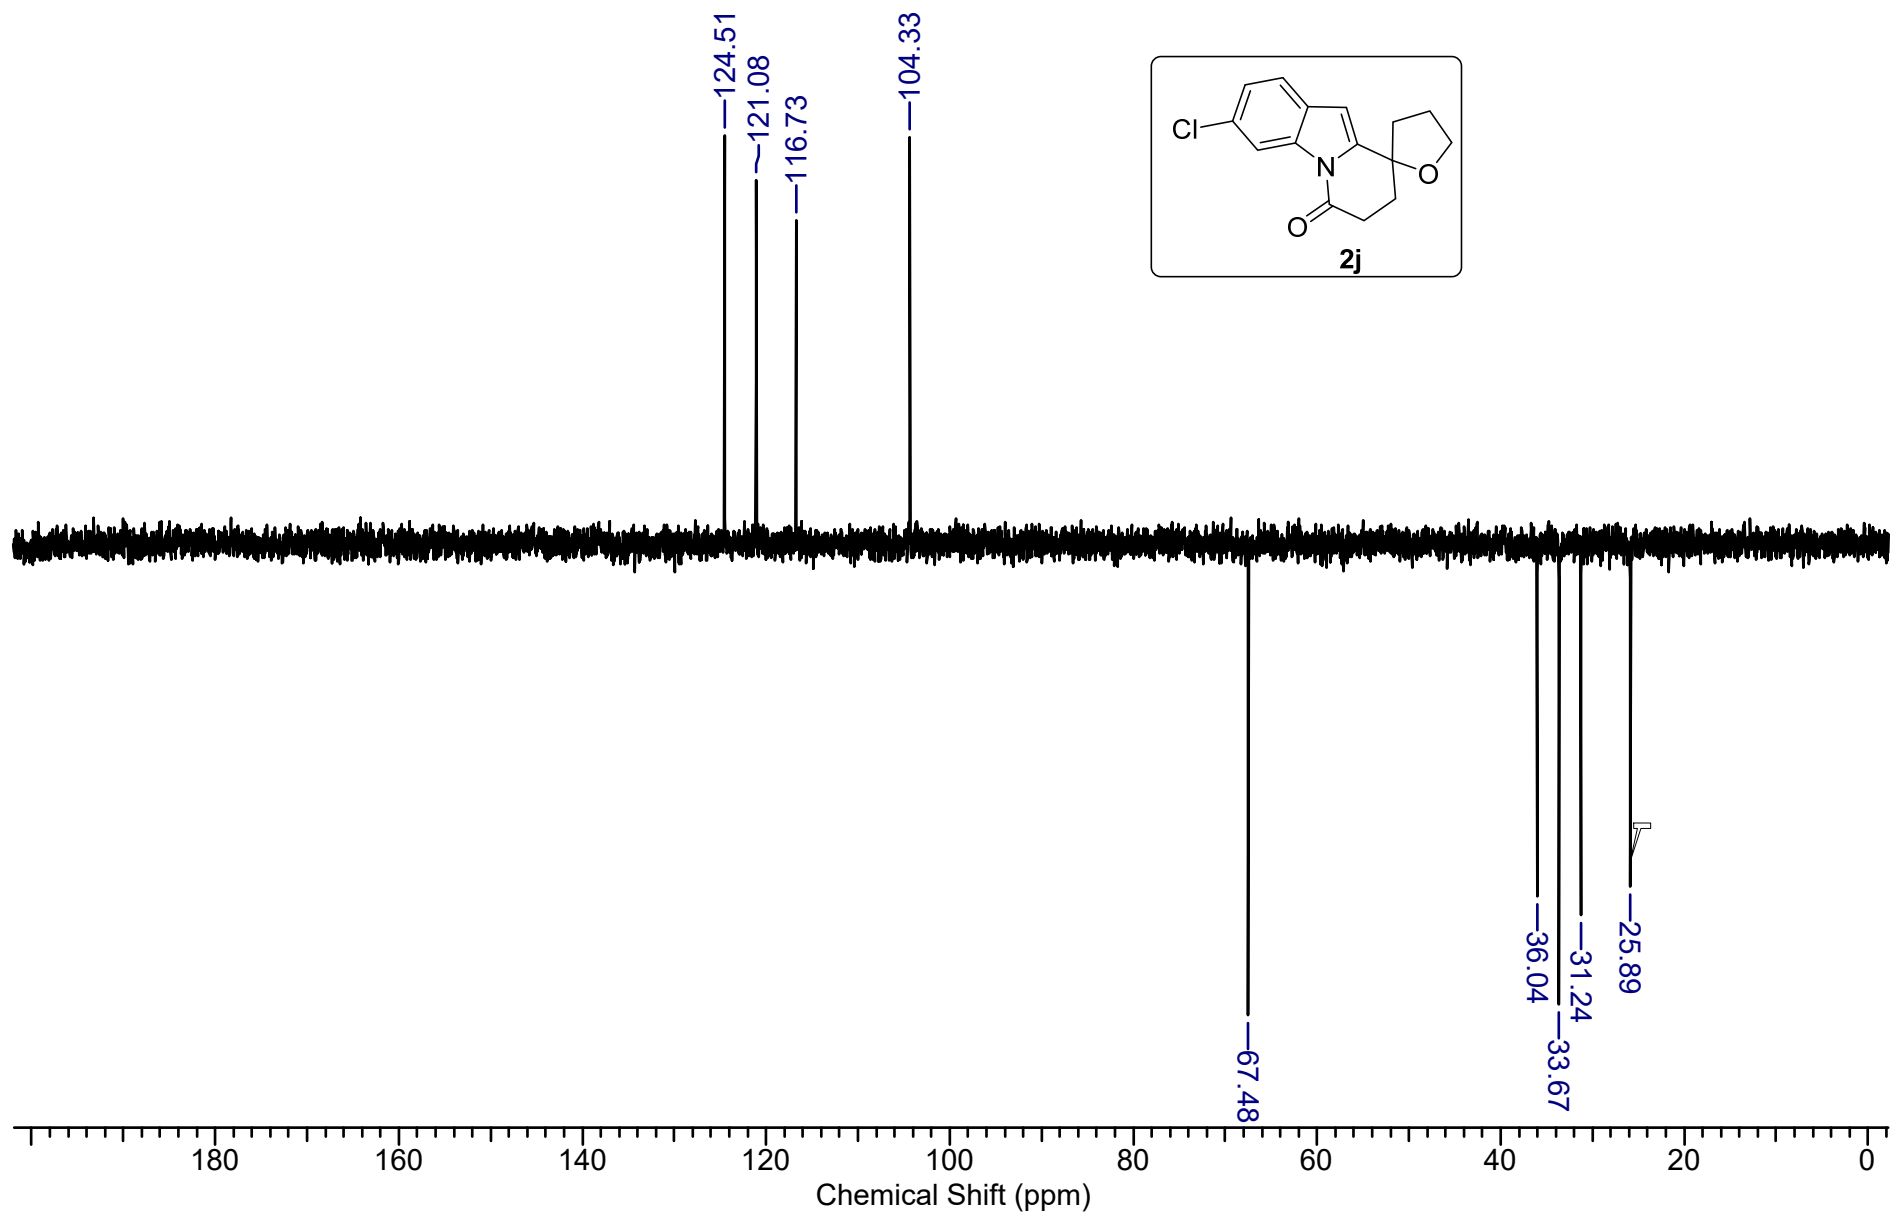

MSH-53 #308 RT: 1.67 AV: 1 NL: 5.54E8  
T: FTMS + p ESI Full ms [100.0000-1500.0000]

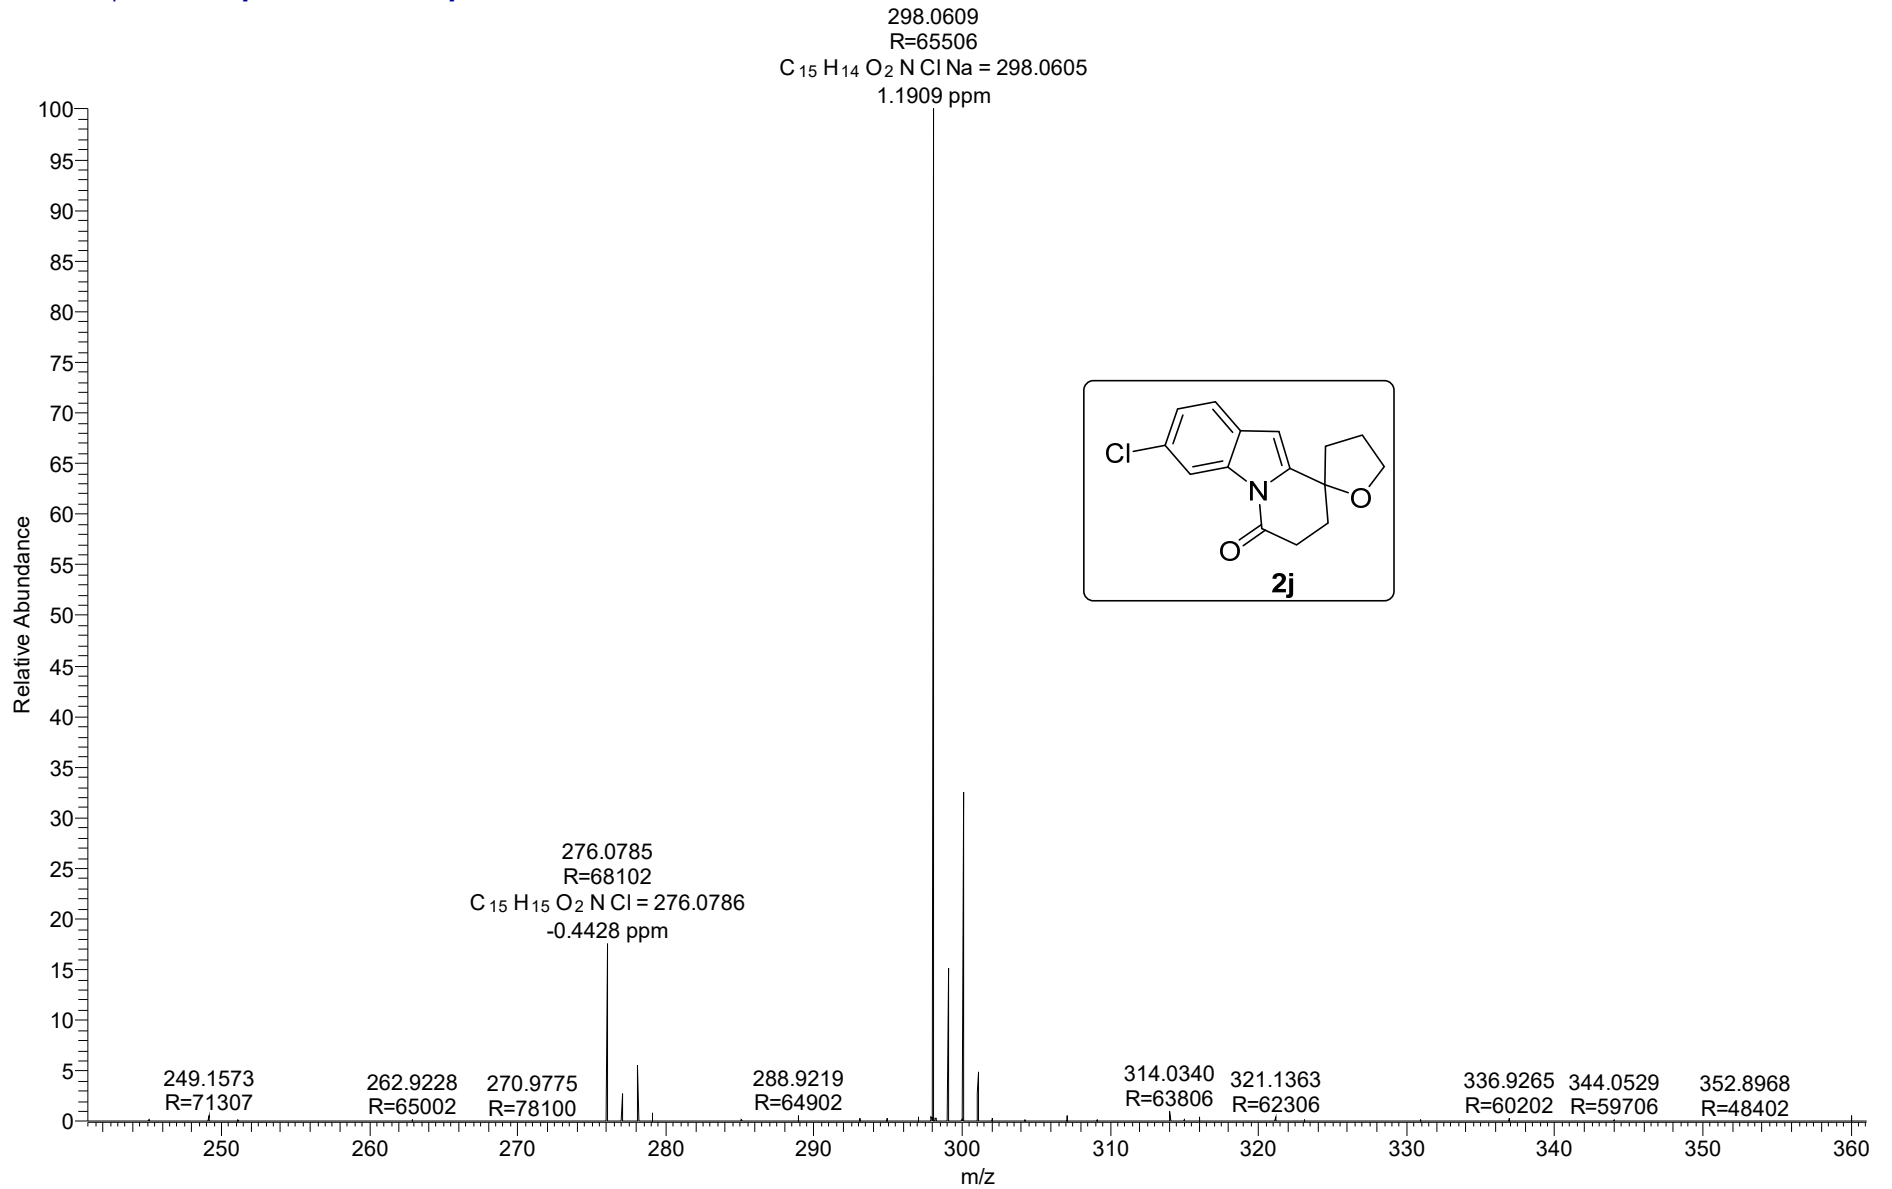

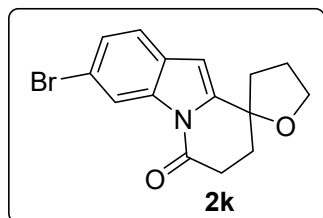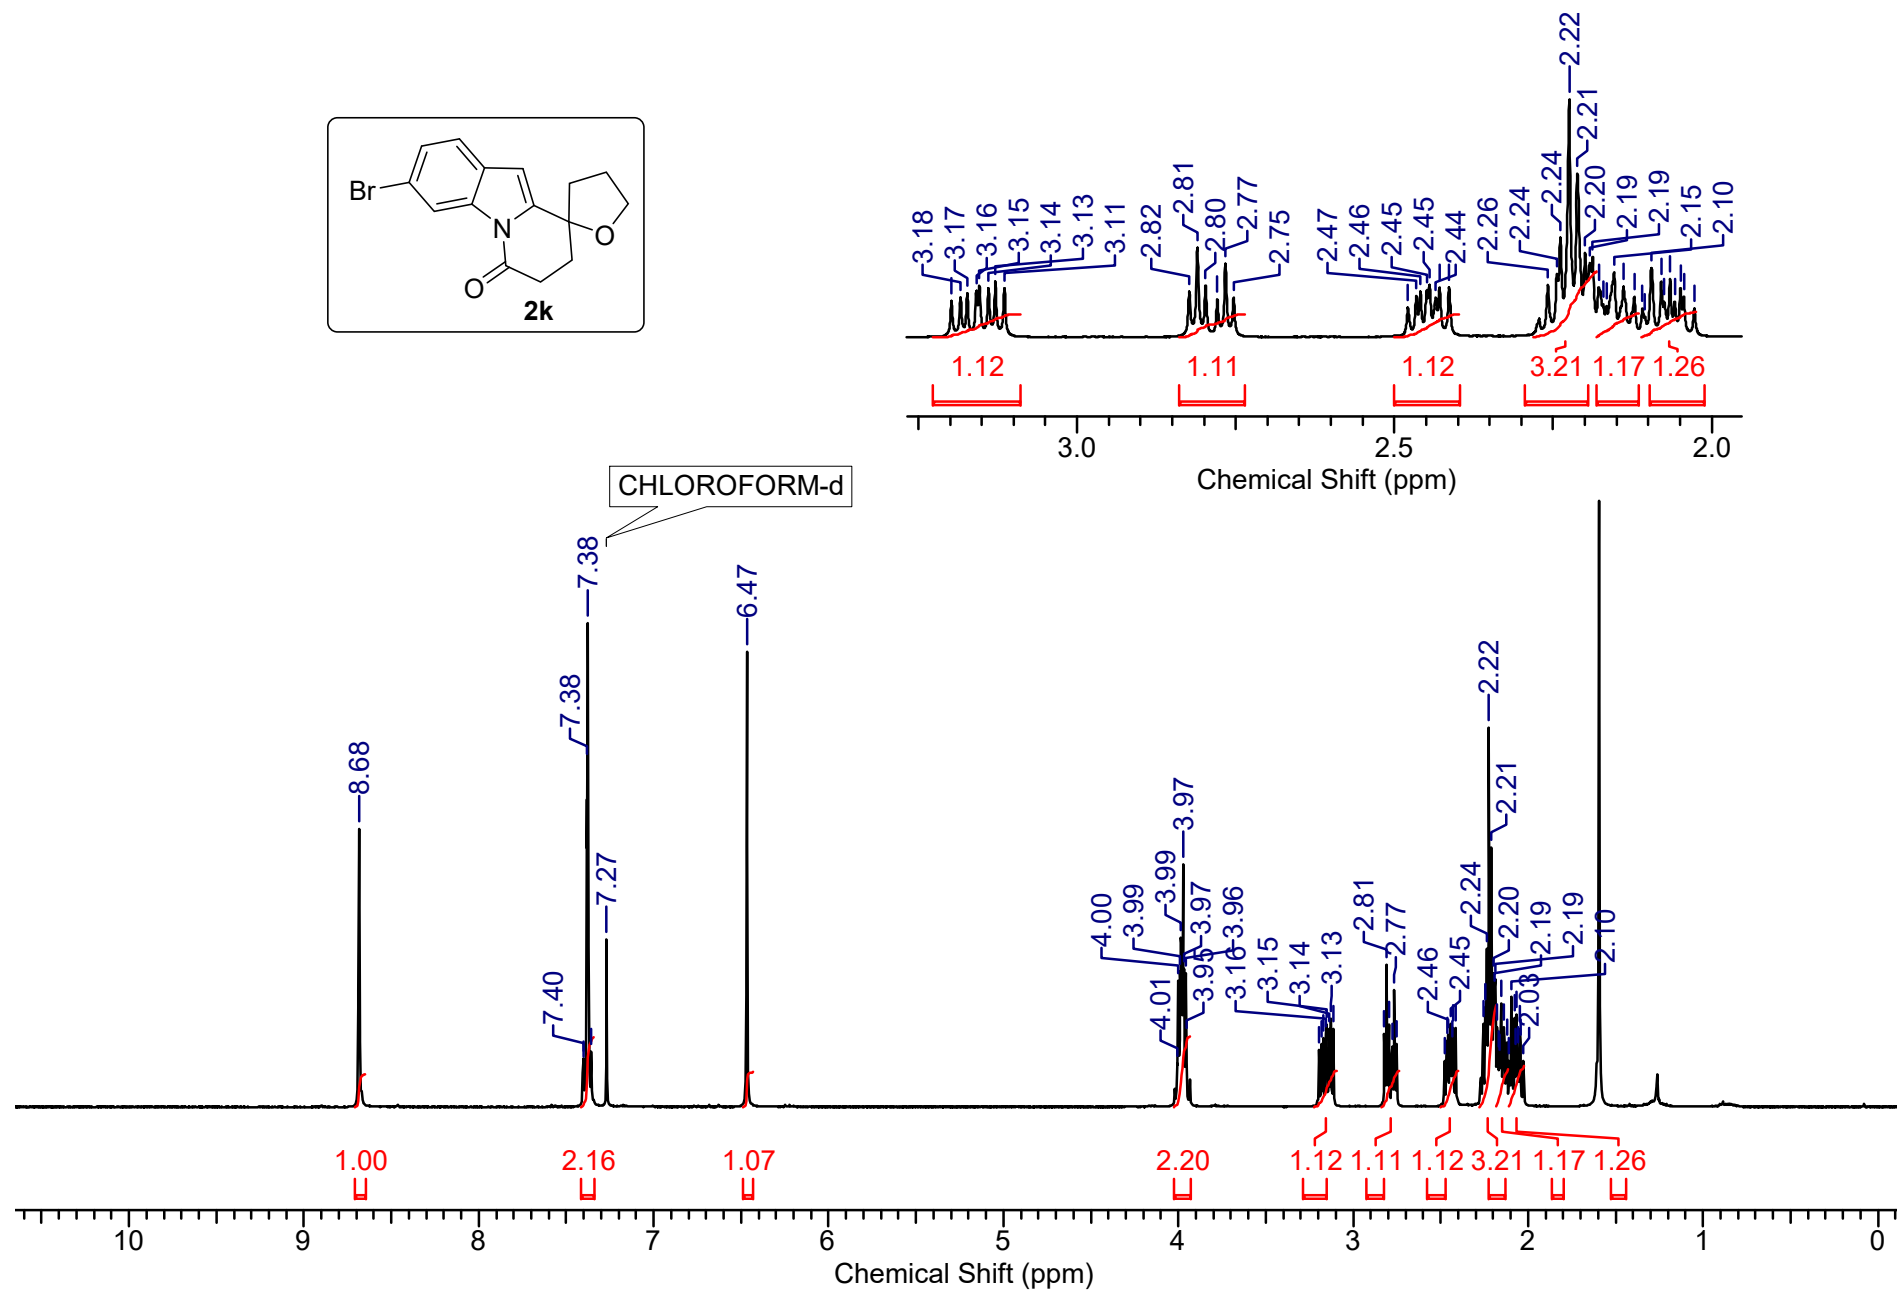

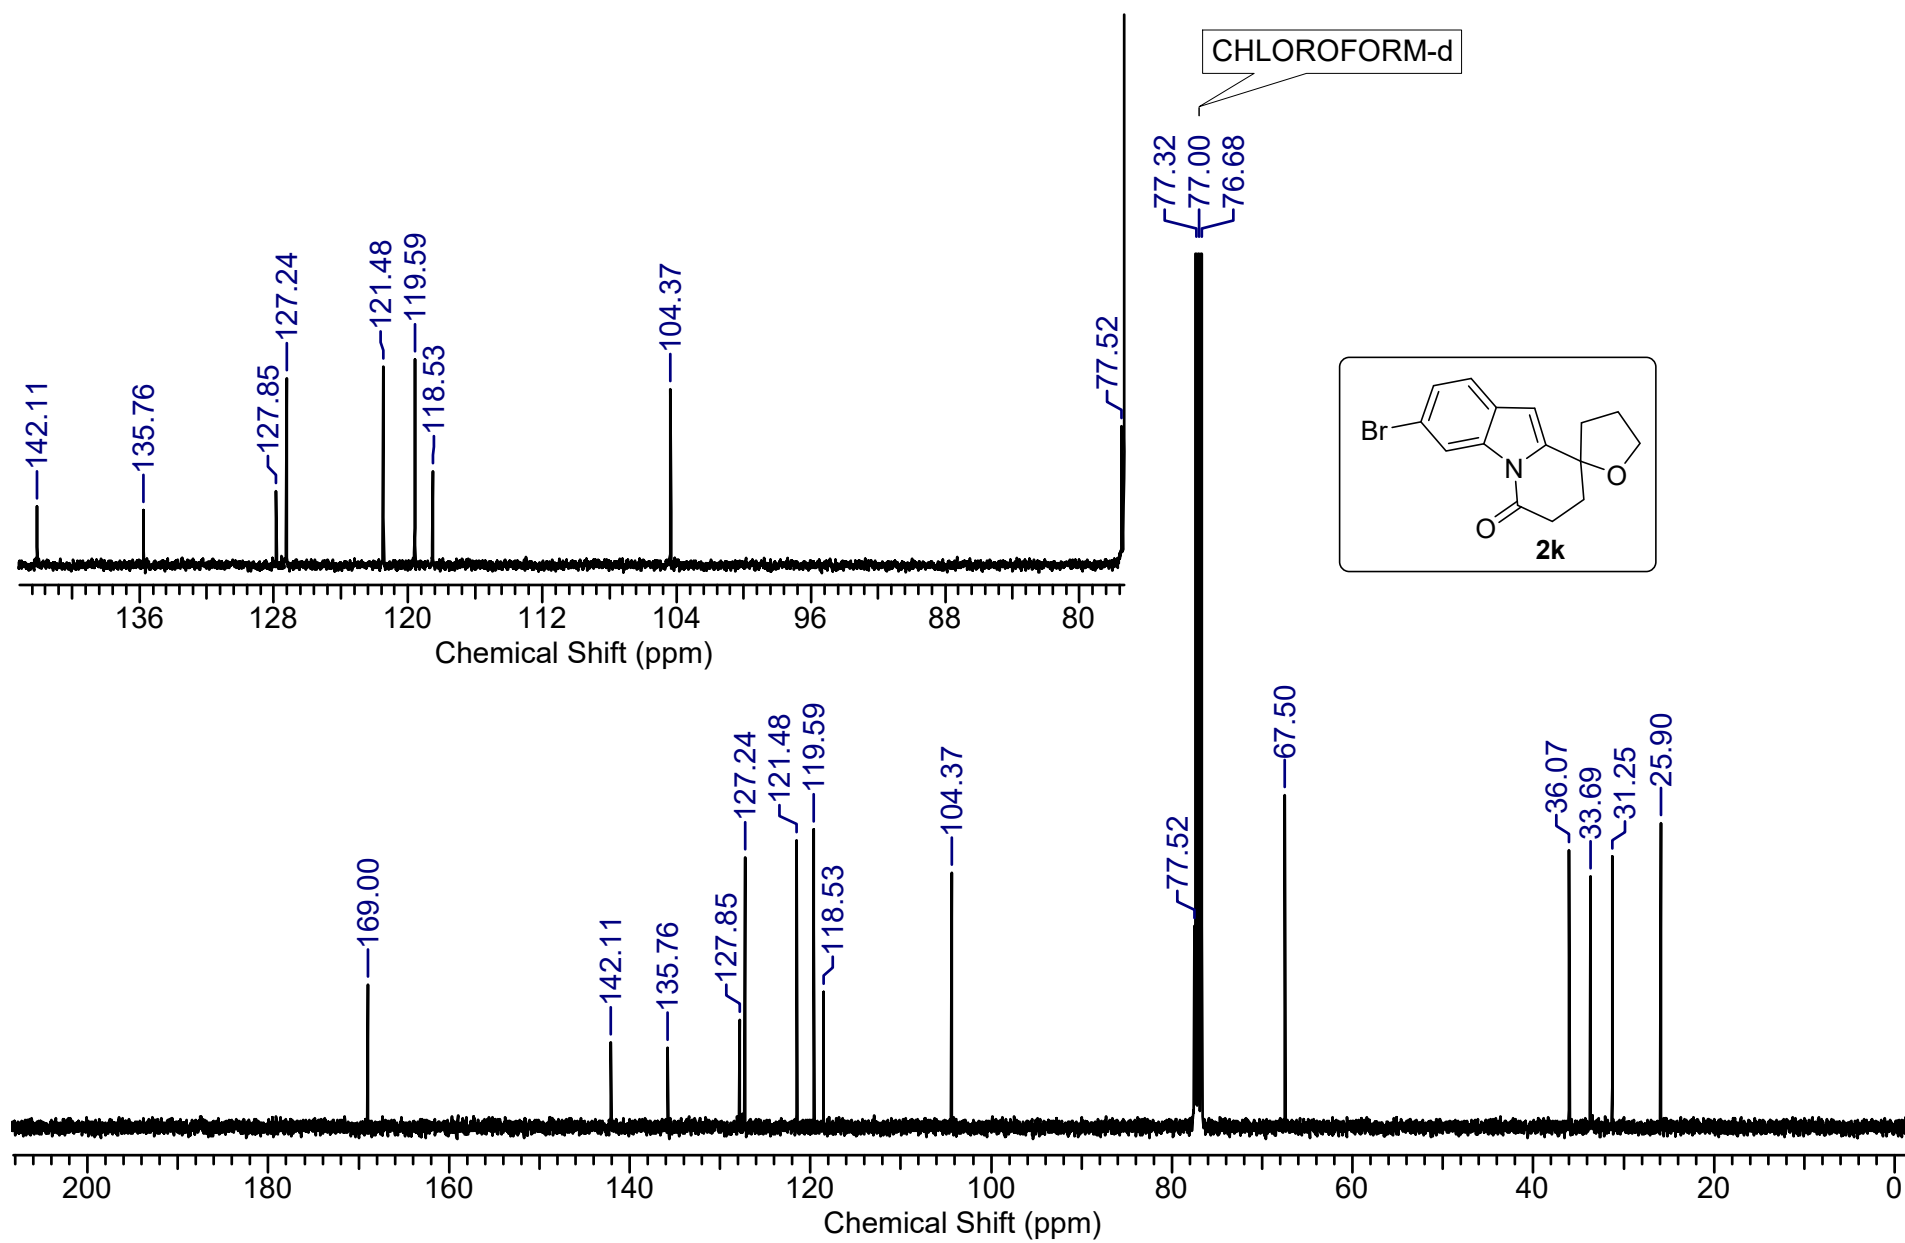

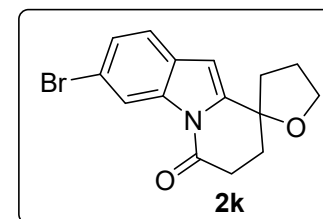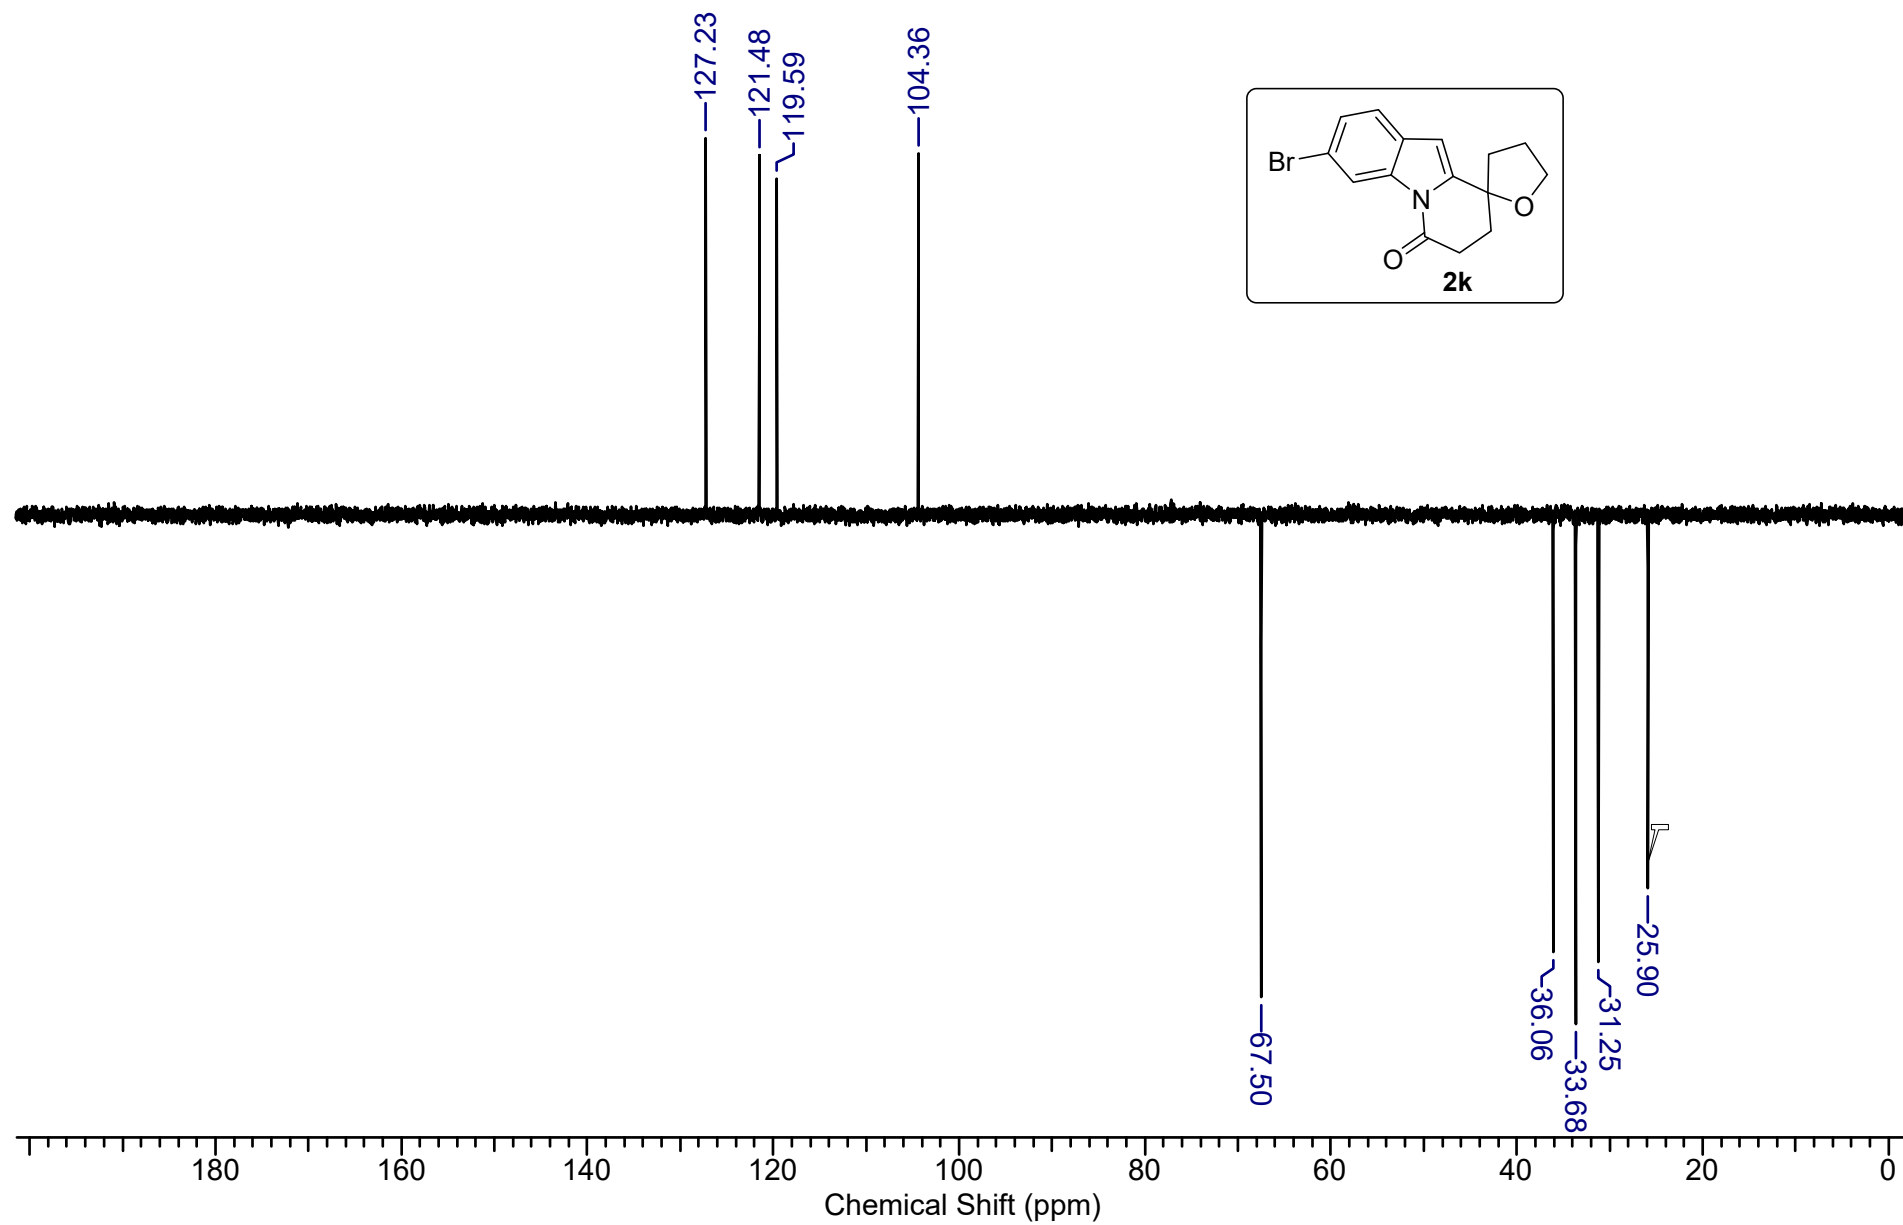



MSH-41 #333 RT: 1.81 AV: 1 NL: 7.76E7  
T: FTMS + p ESI Full ms [100.0000-1500.0000]

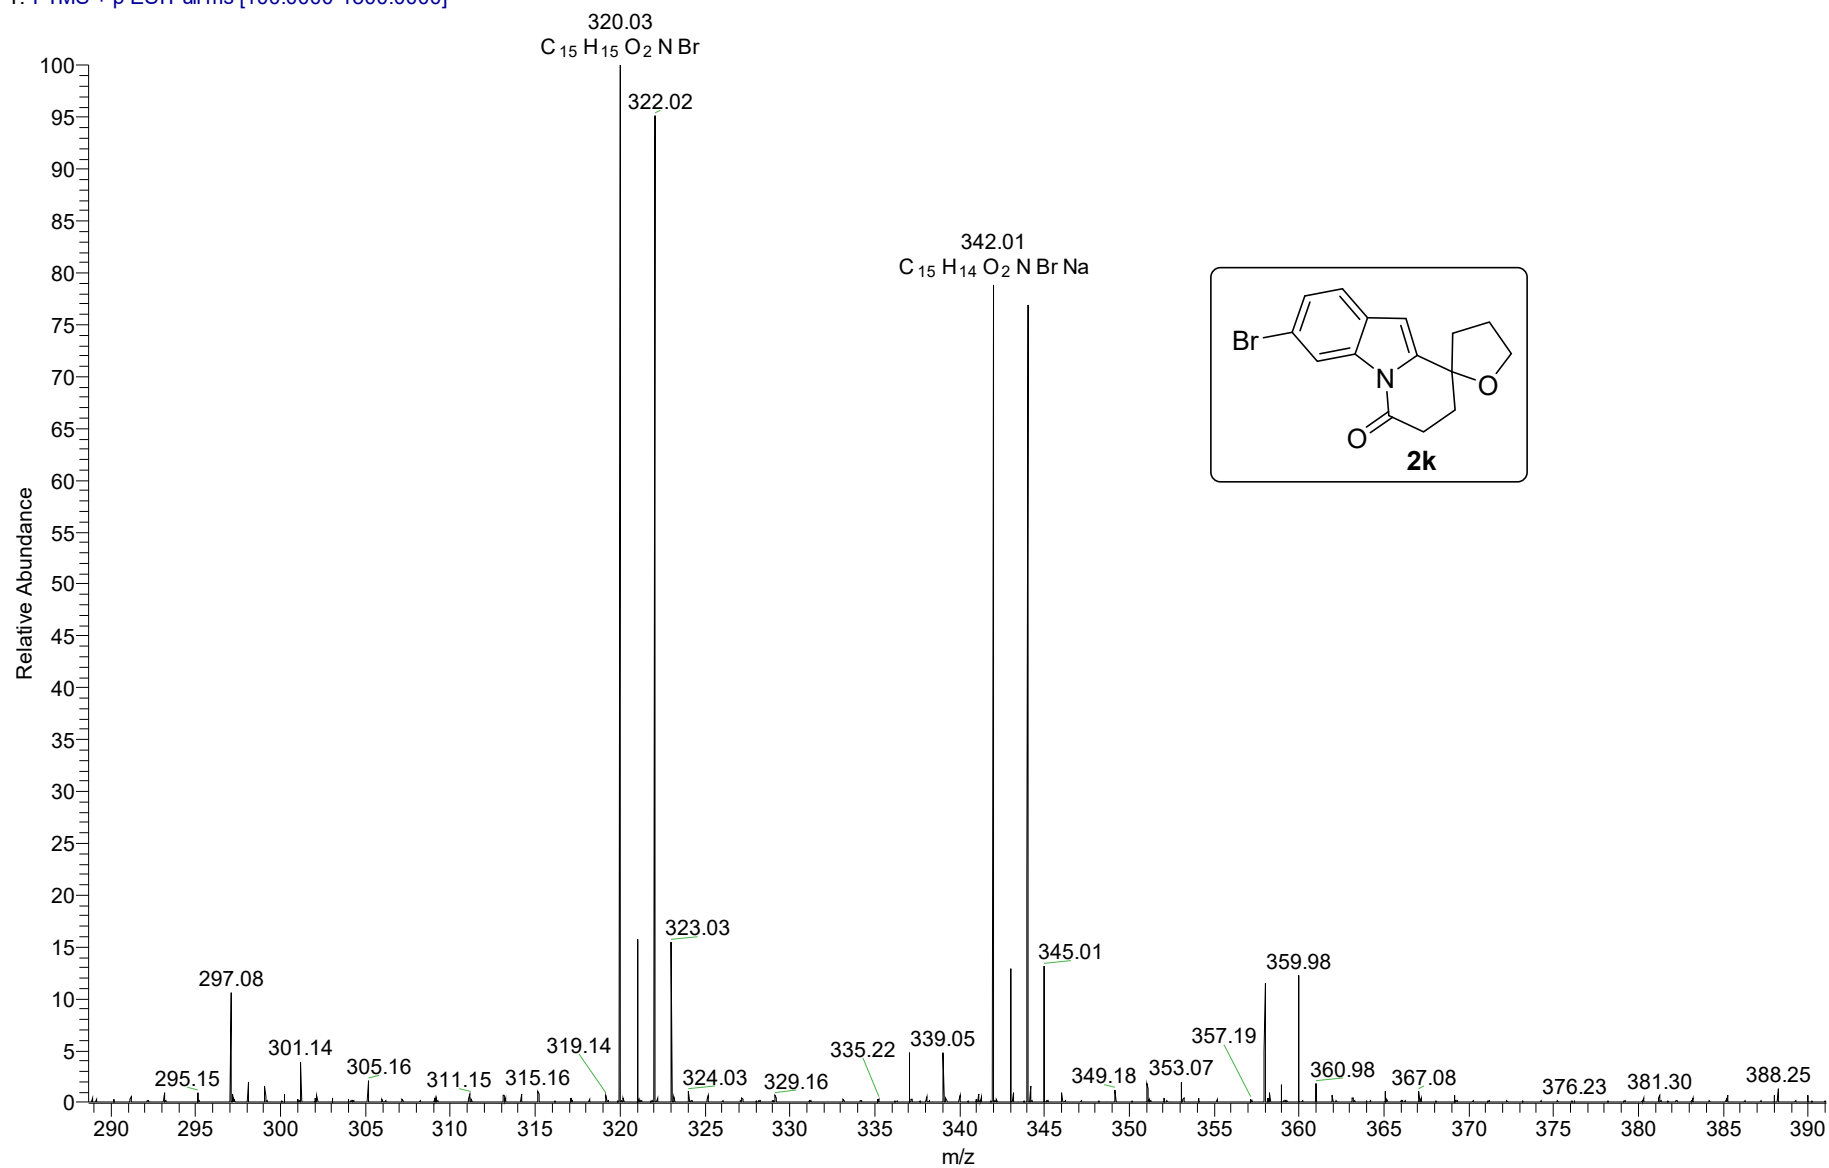

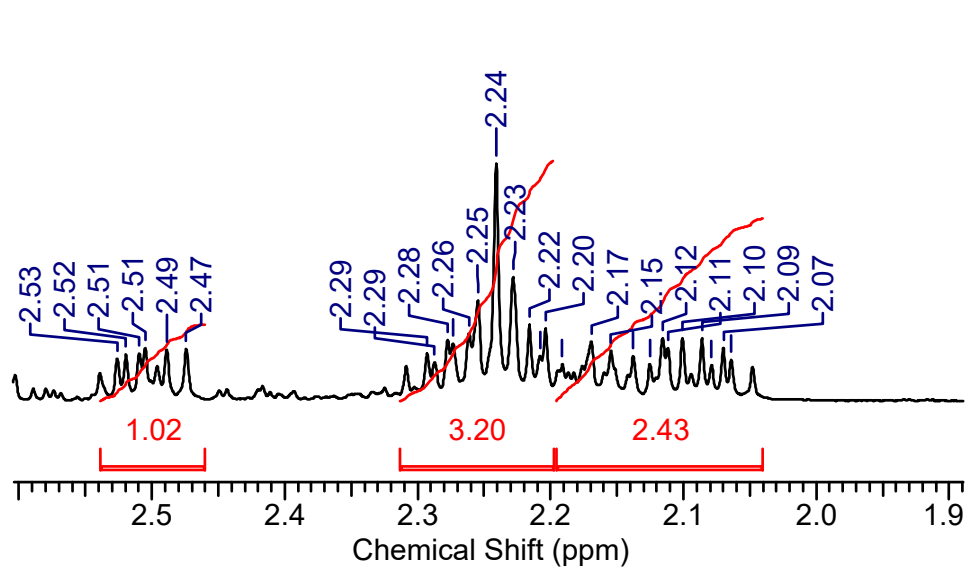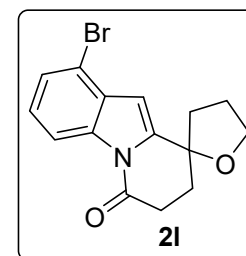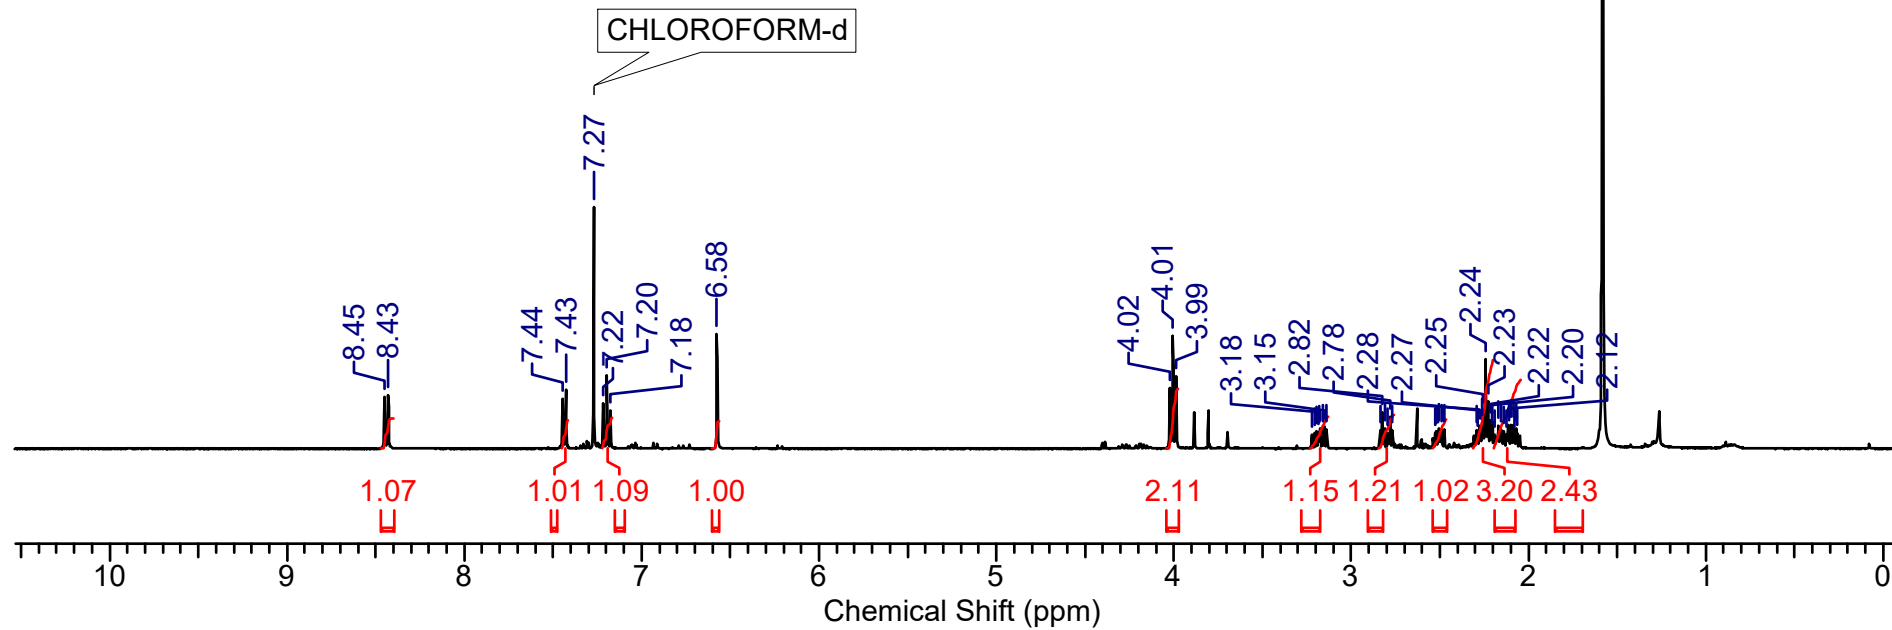

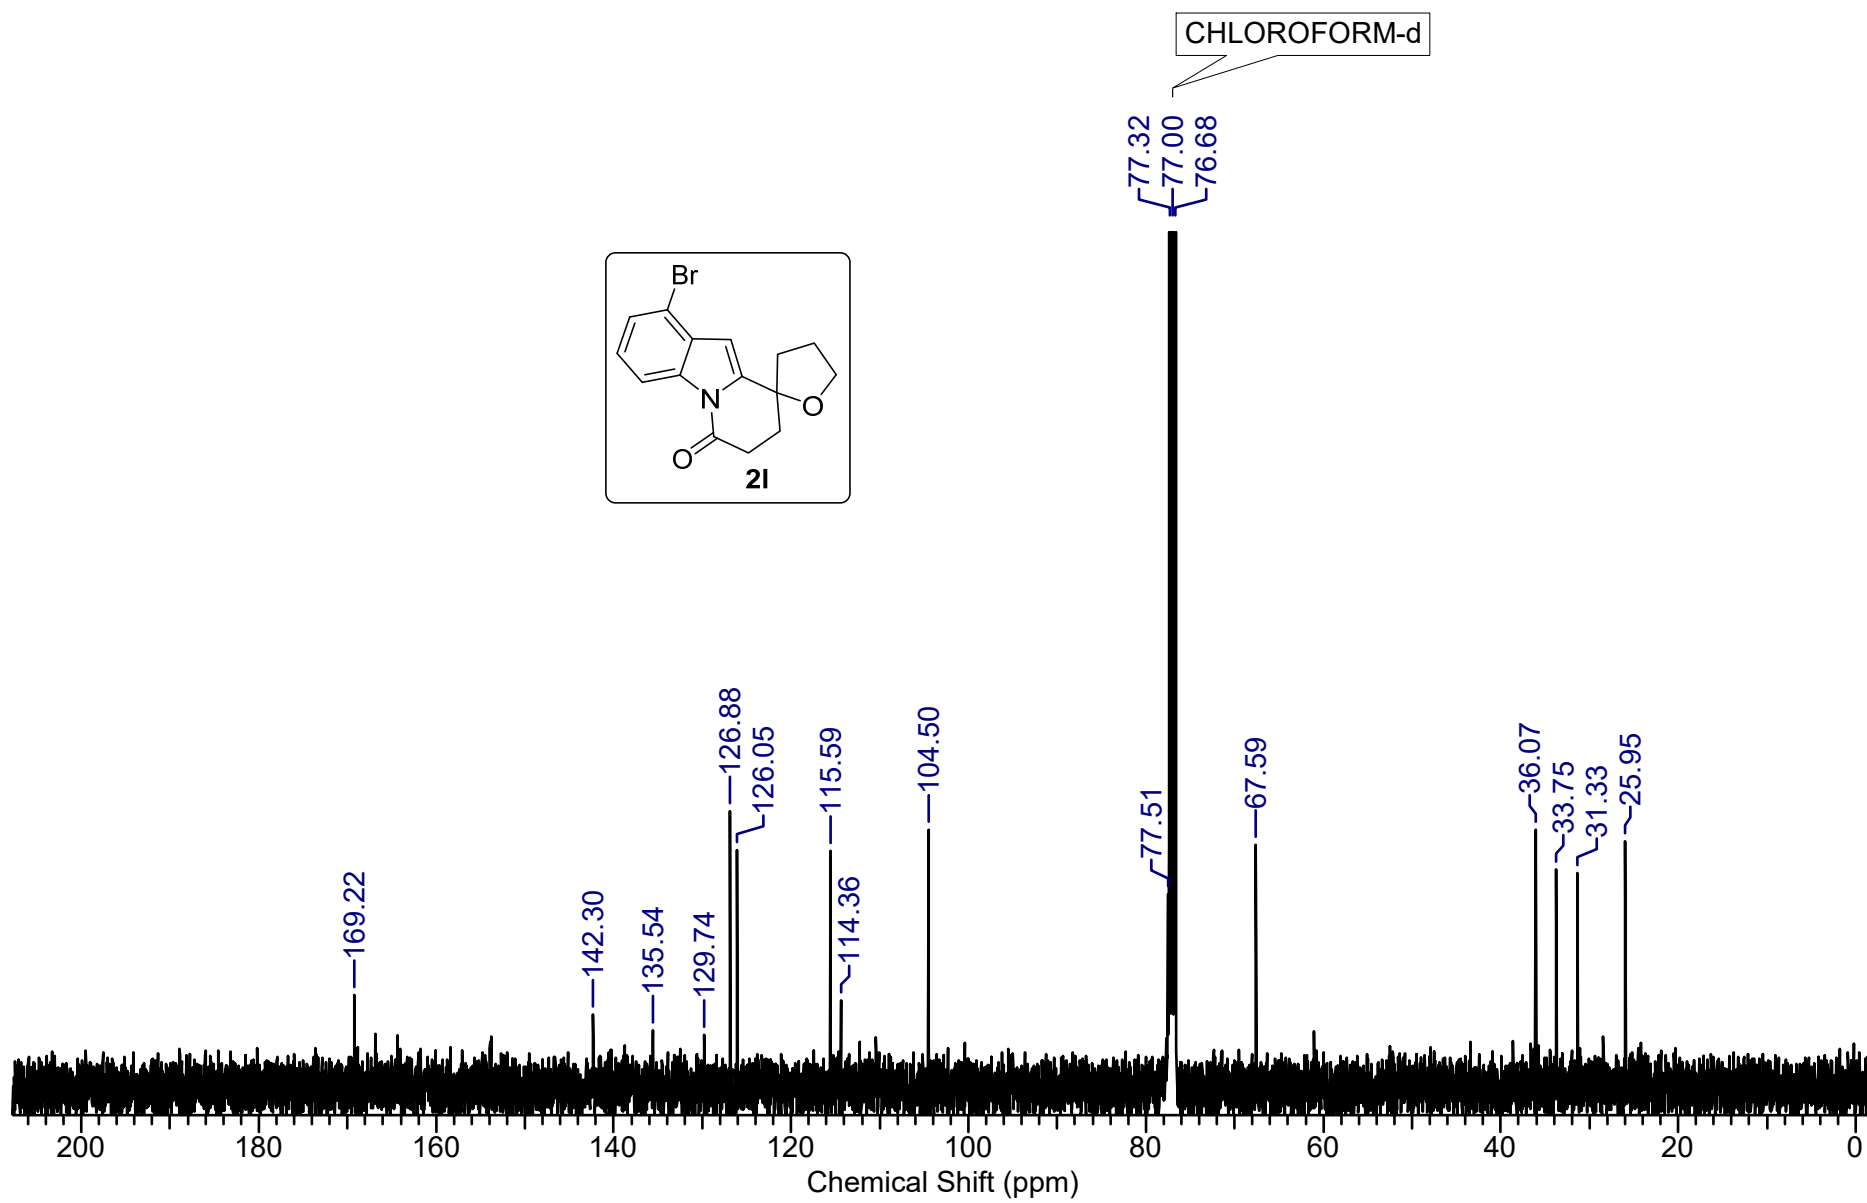

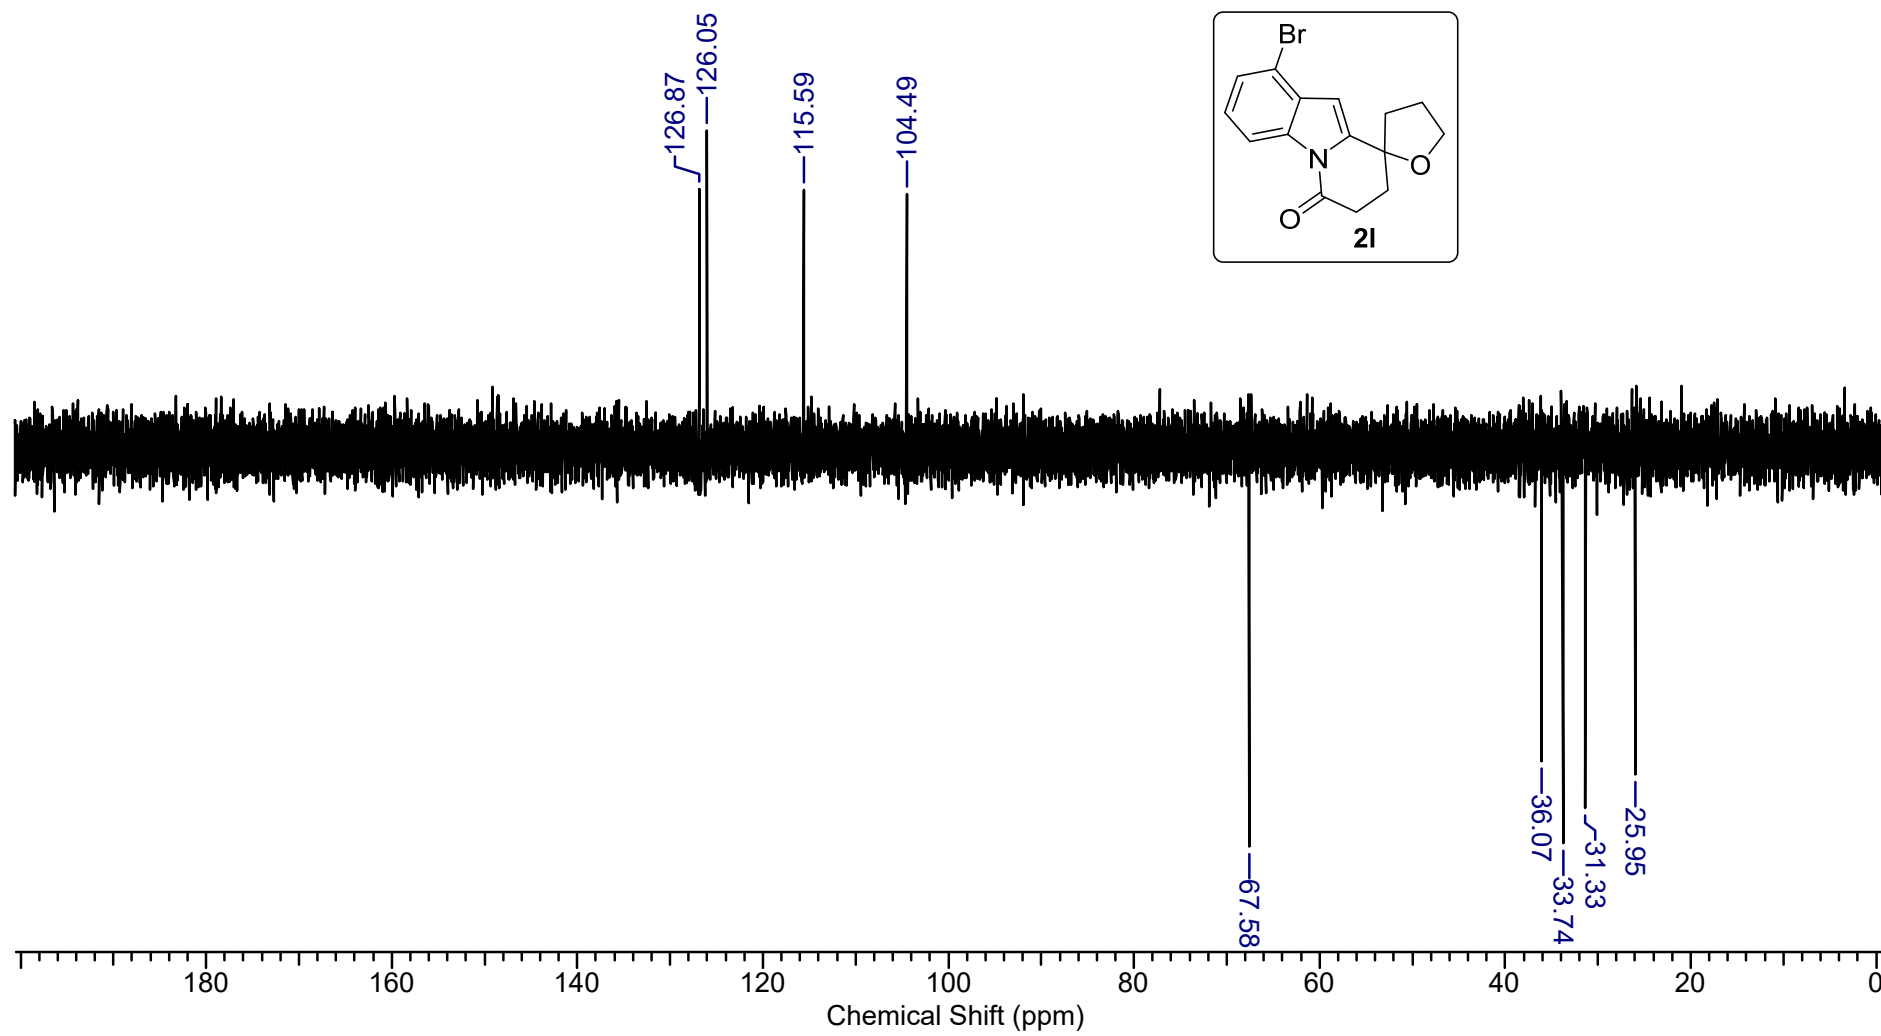

MS-11a #313 RT: 1.68 AV: 1 NL: 2.30E7  
T: FTMS + p ESI Full ms [100.0000-1500.0000]

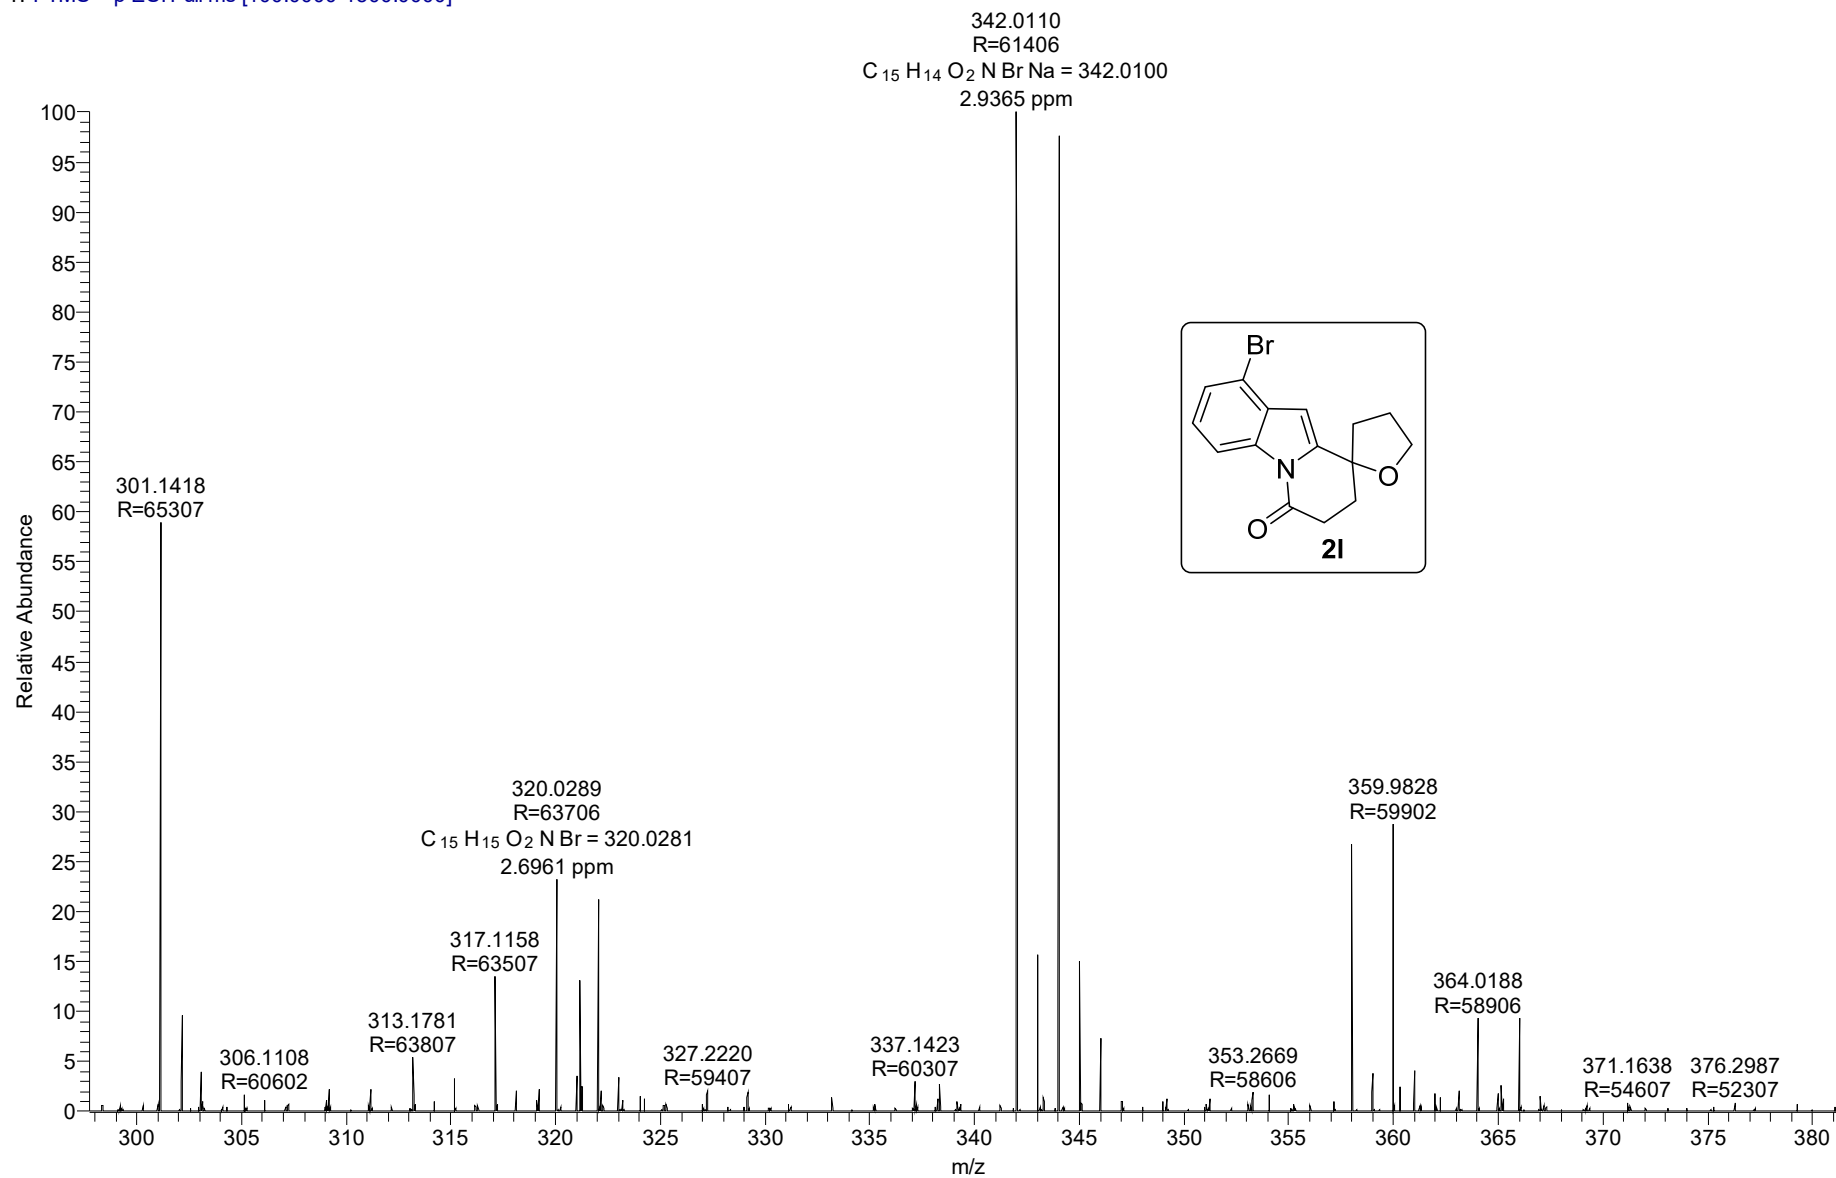

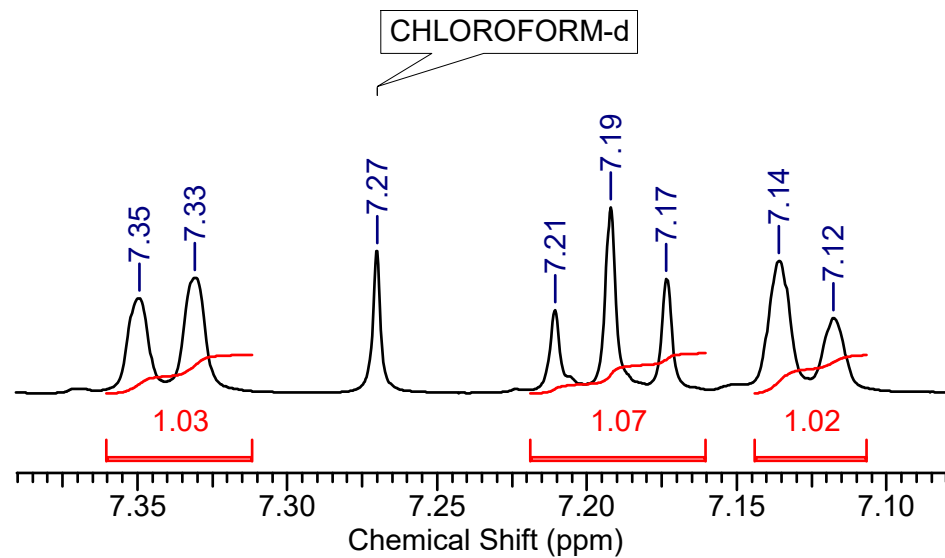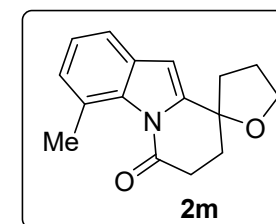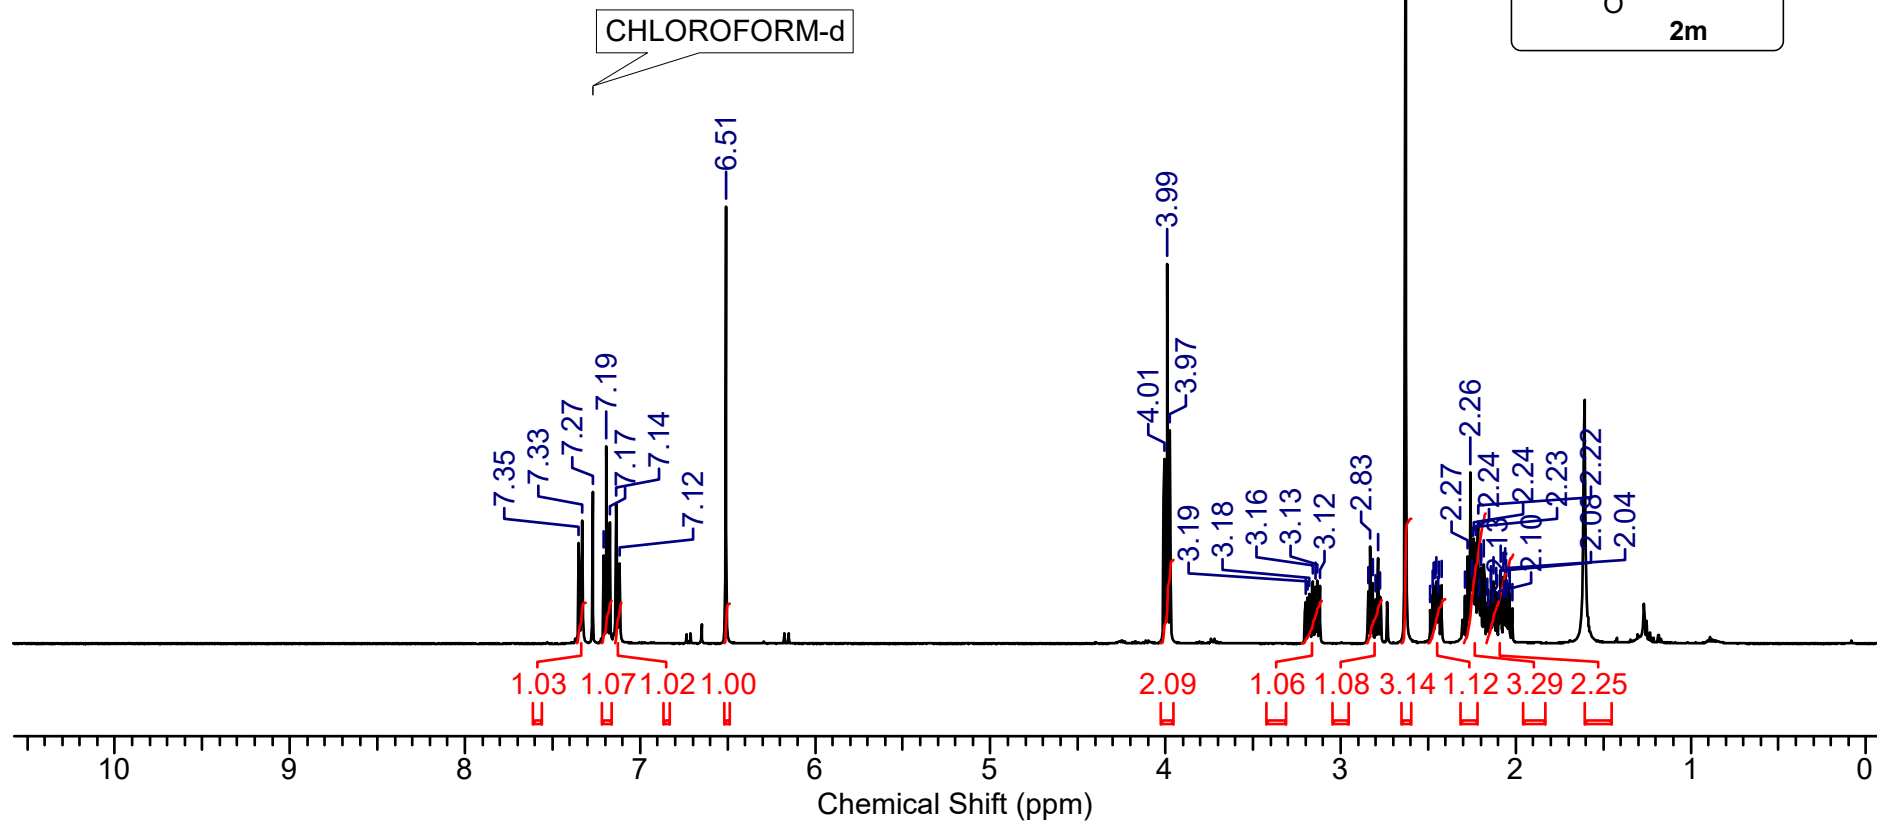

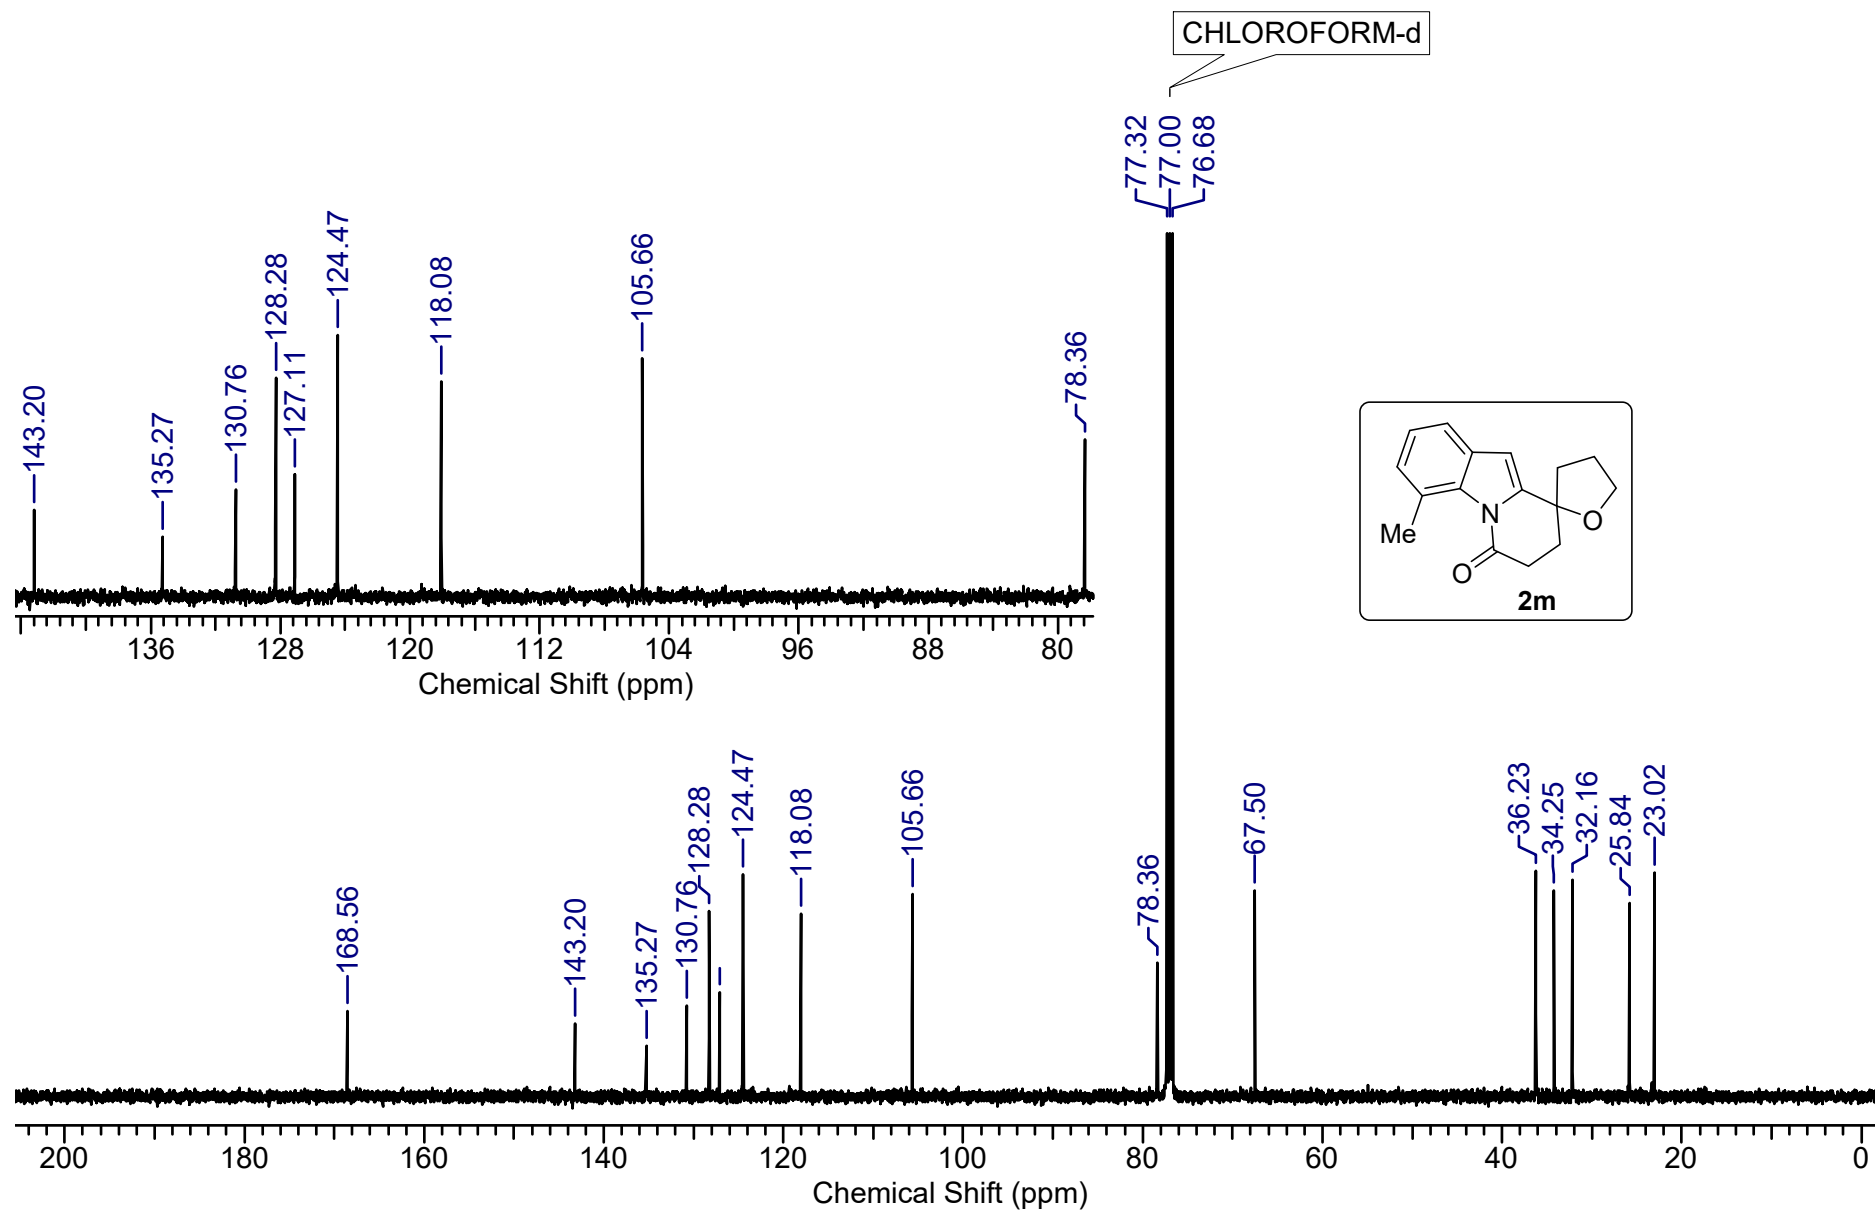





MSH-38 #292 RT: 1.59 AV: 1 NL: 7.47E8  
T: FTMS + p ESI Full ms [100.0000-1500.0000]

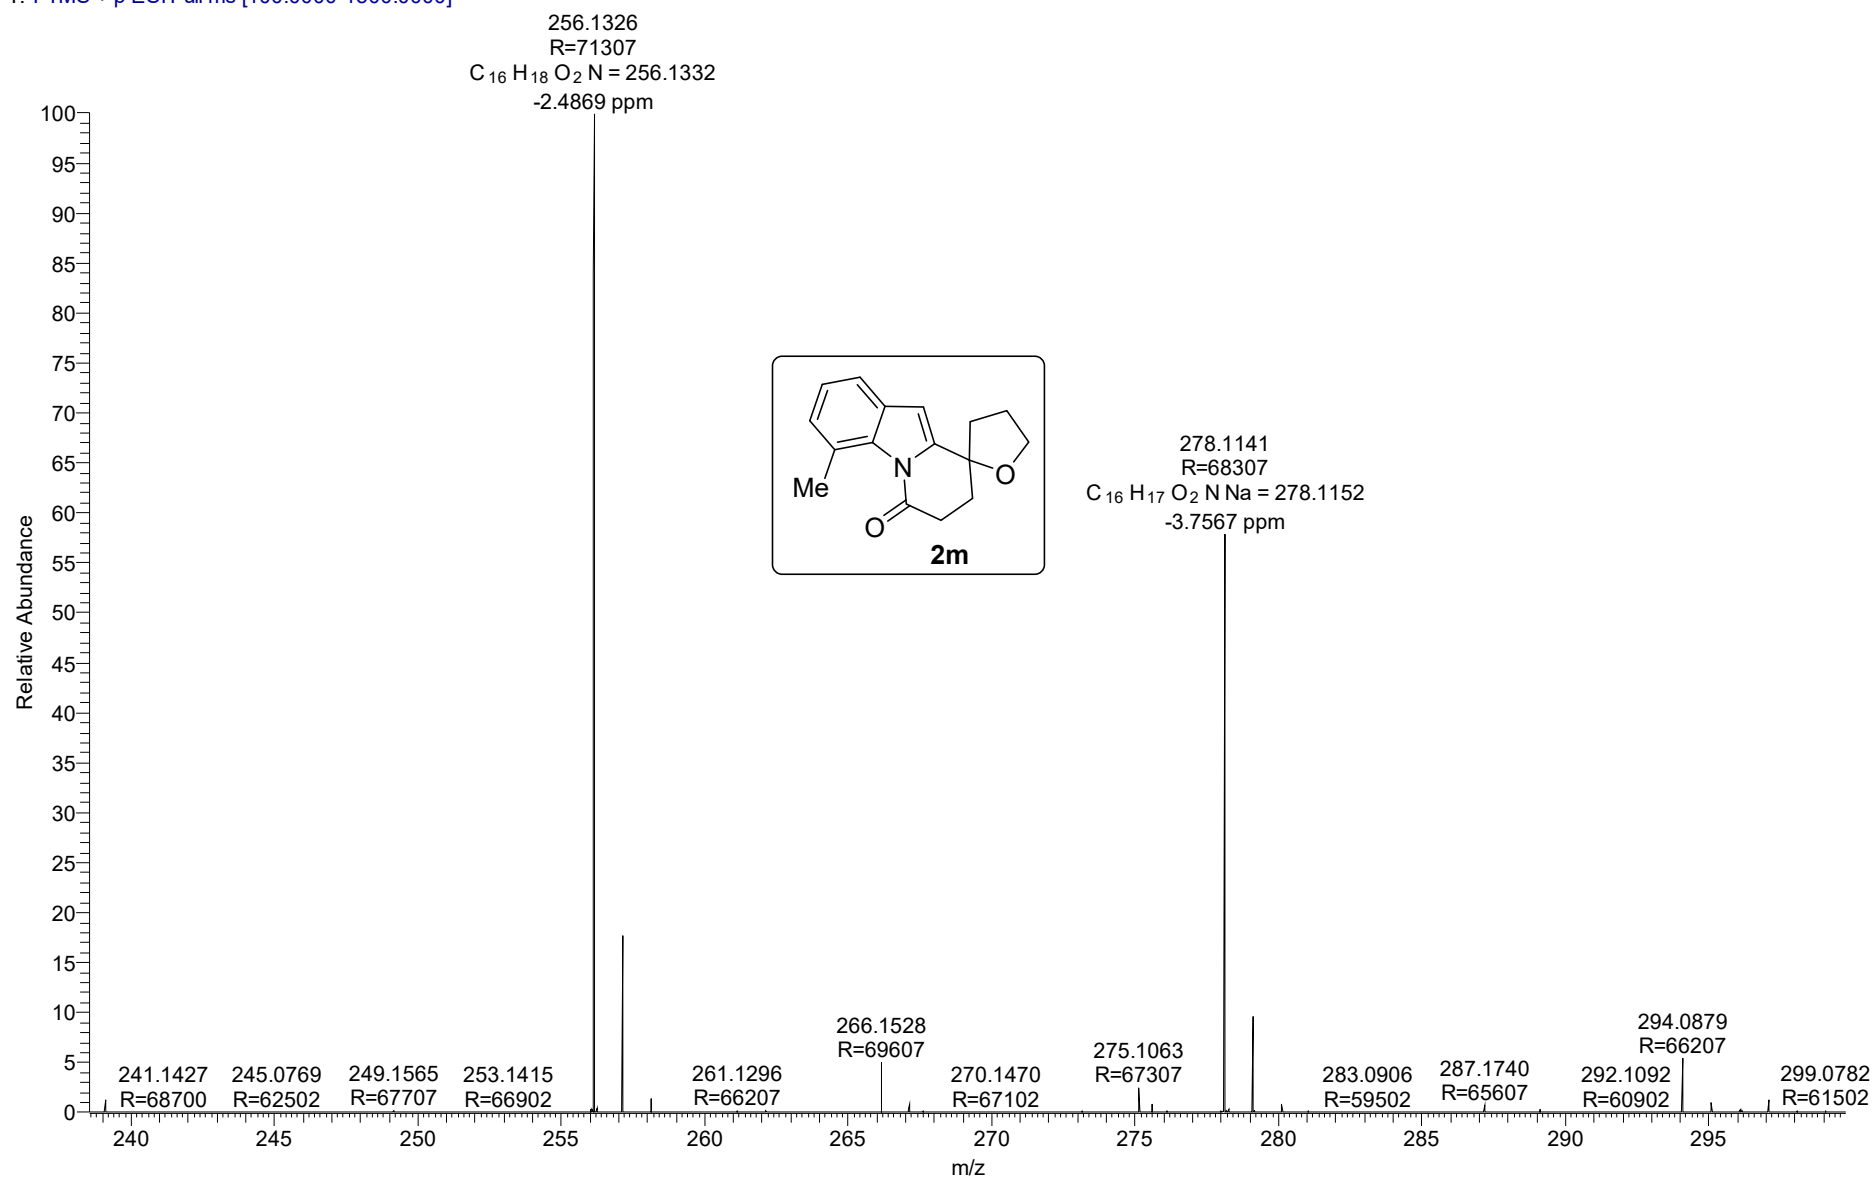

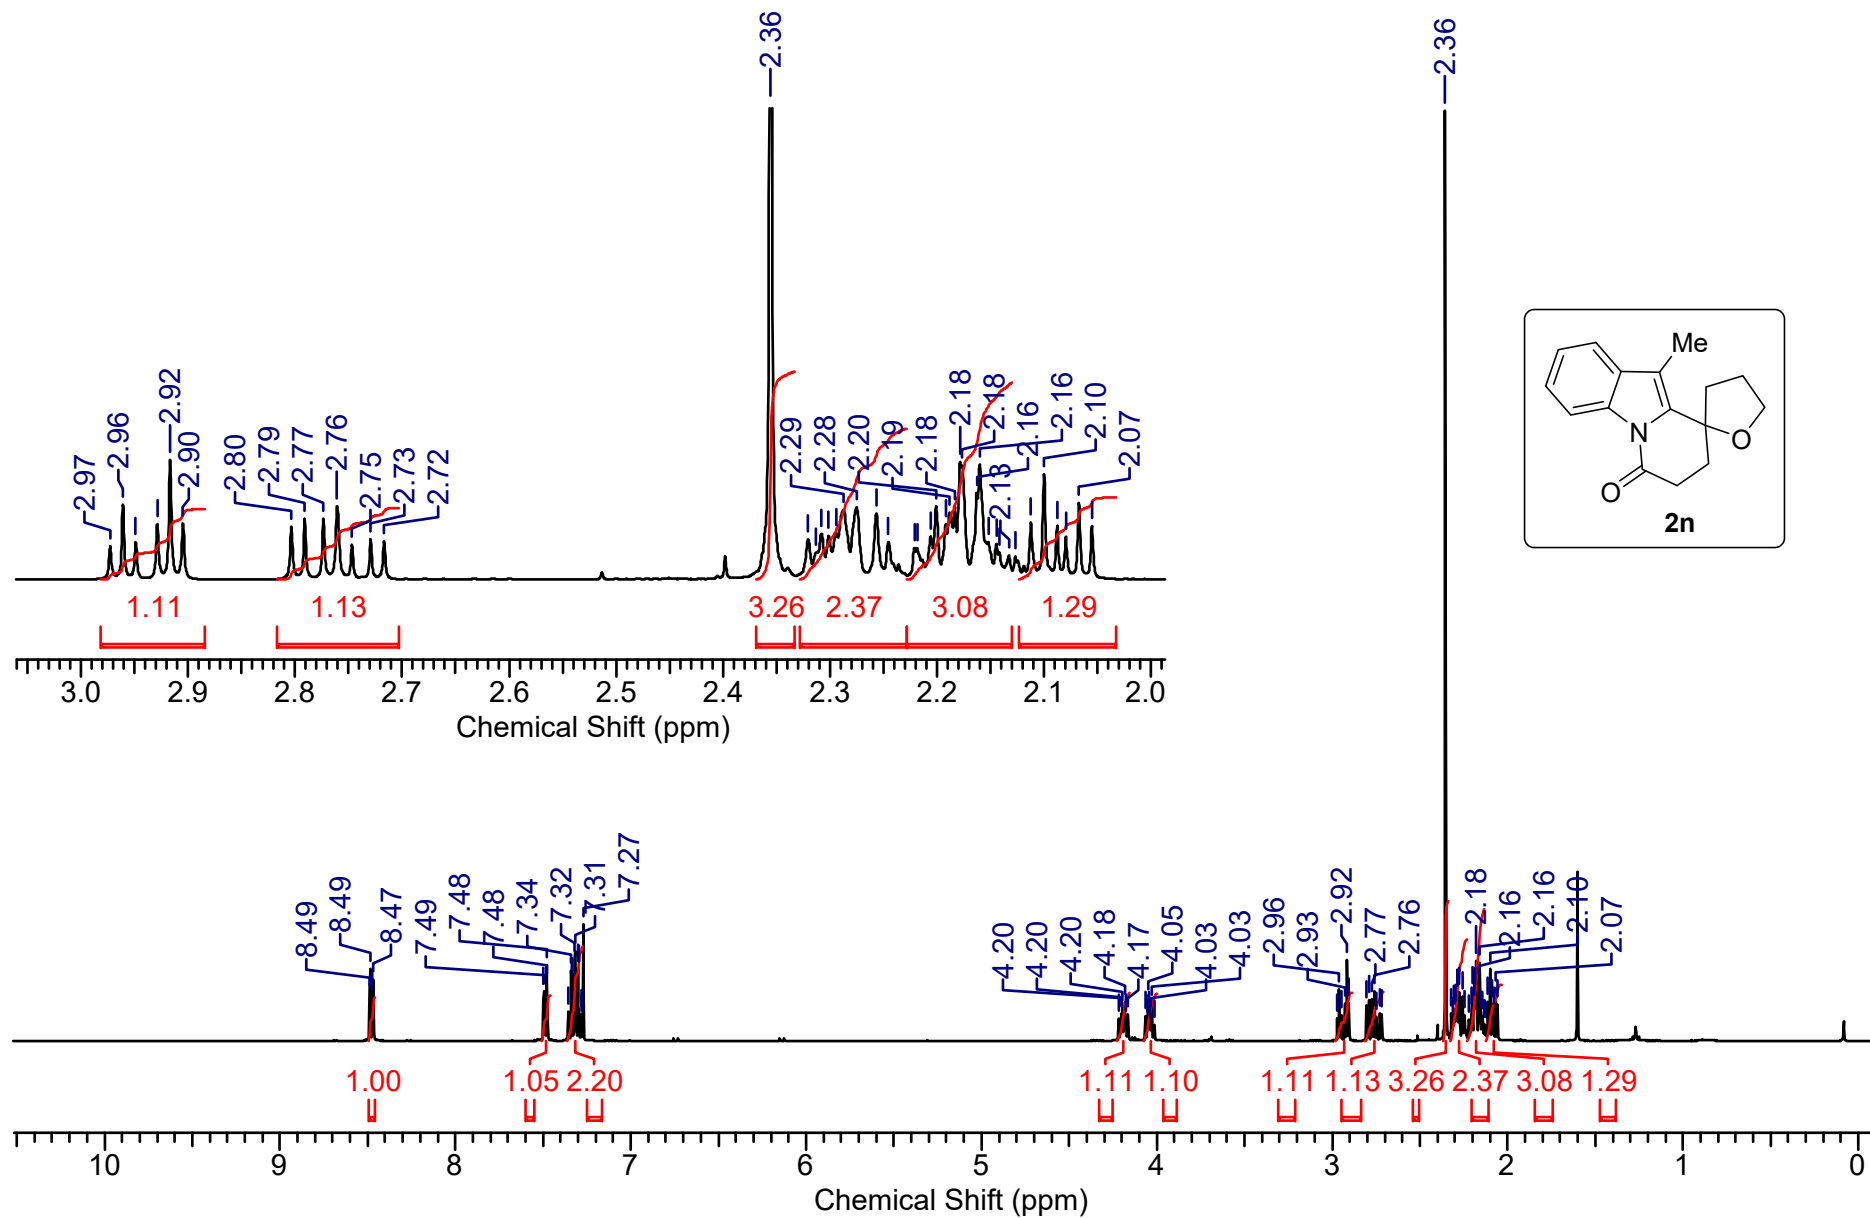

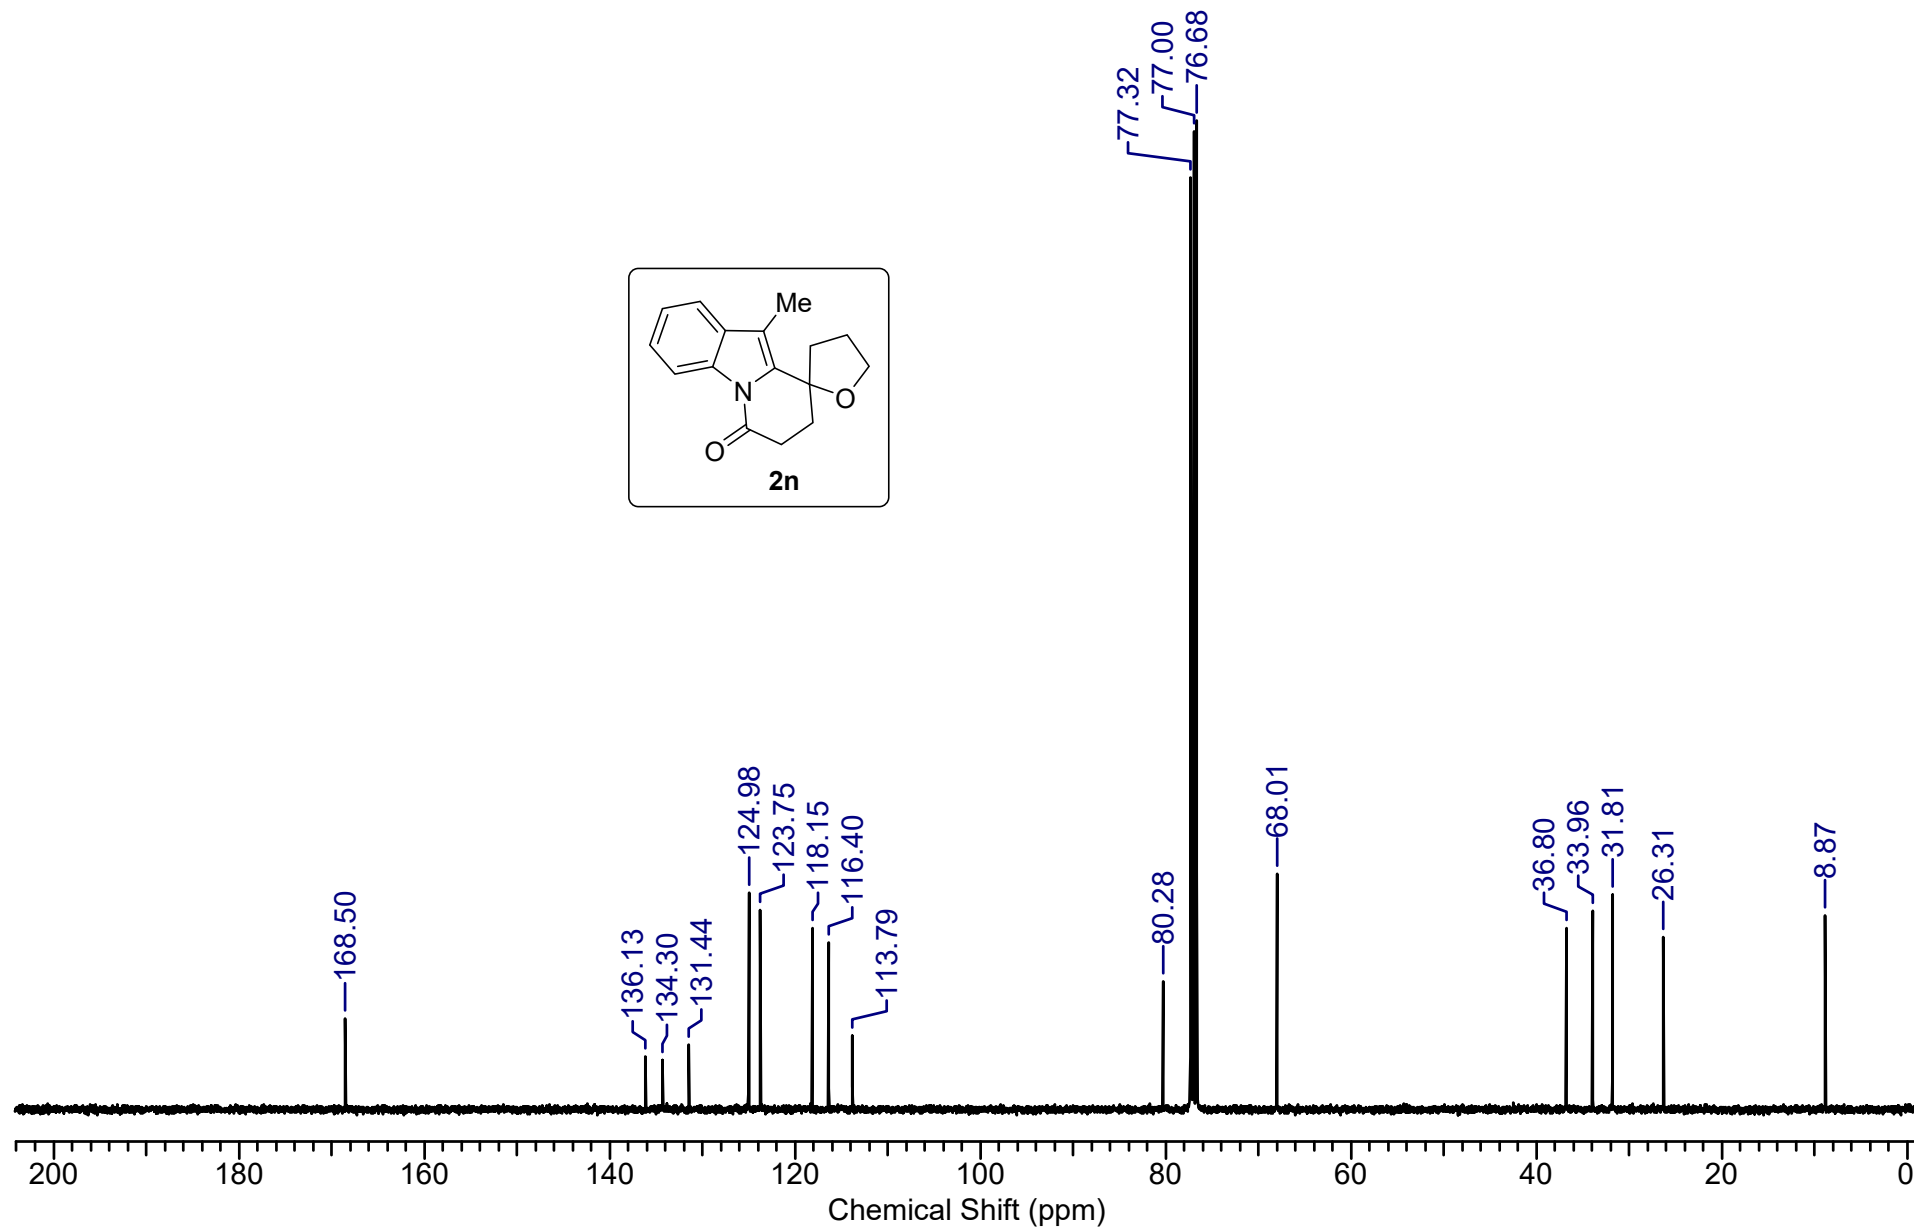

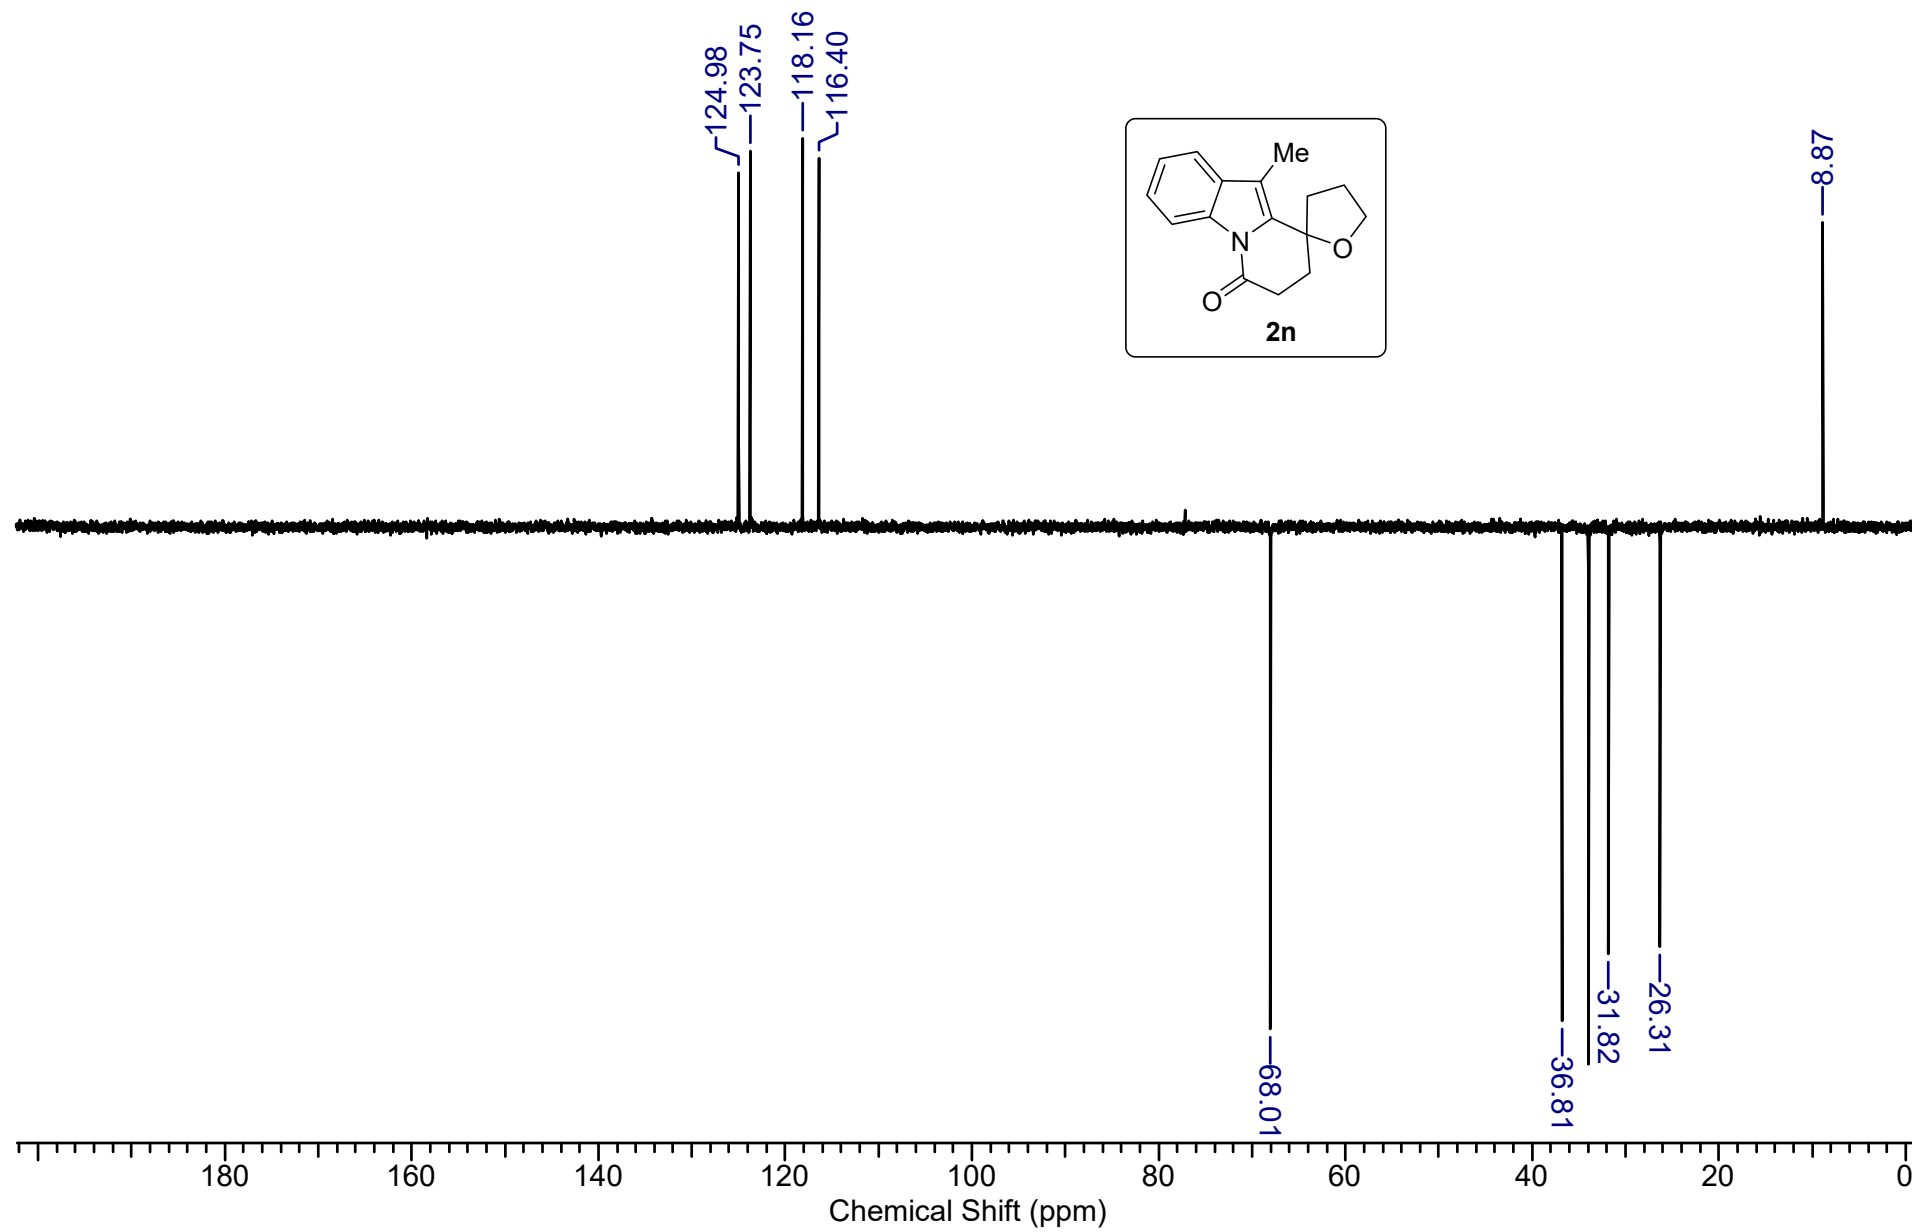

MS-10a #312 RT: 1.67 AV: 1 NL: 4.32E7  
T: FTMS + p ESI Full ms [100.0000-1500.0000]

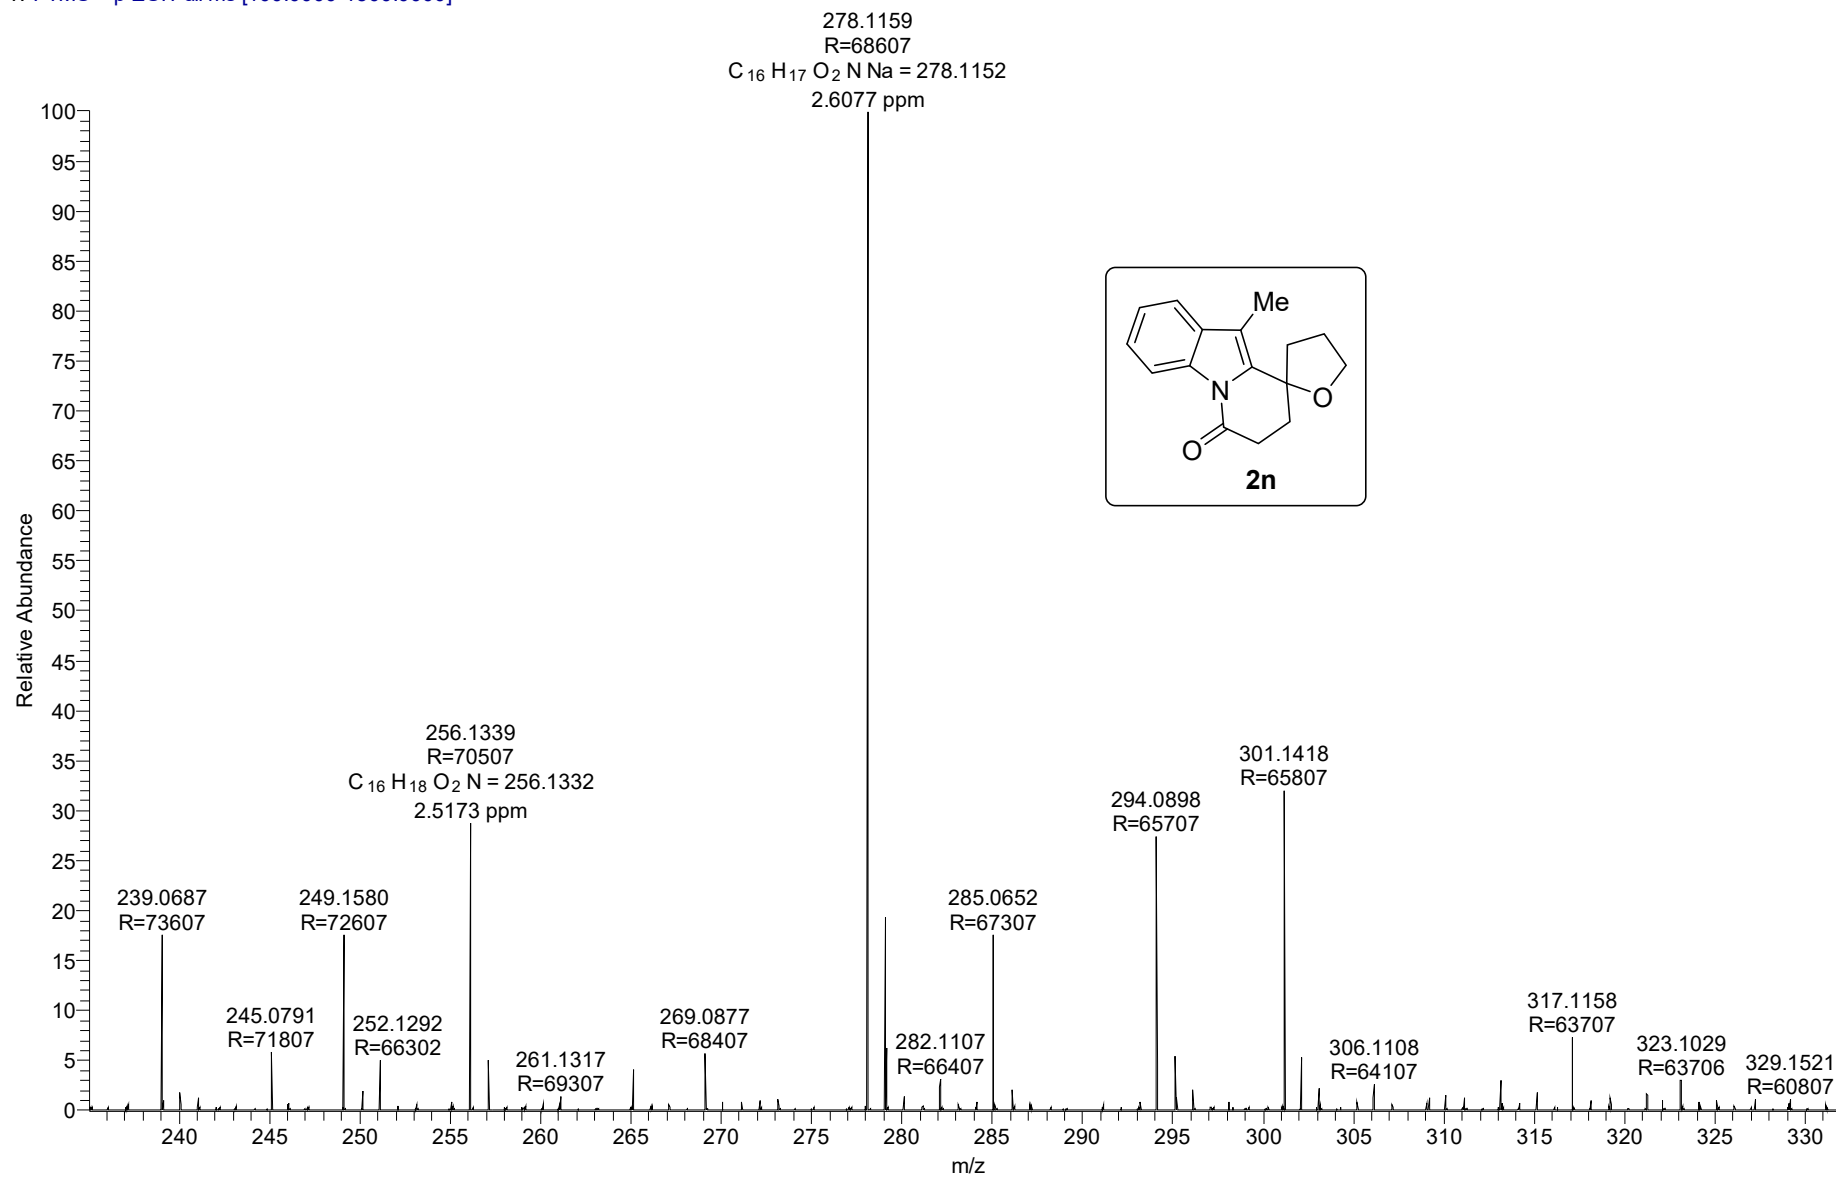

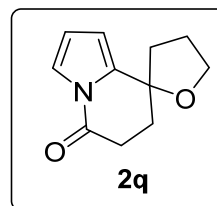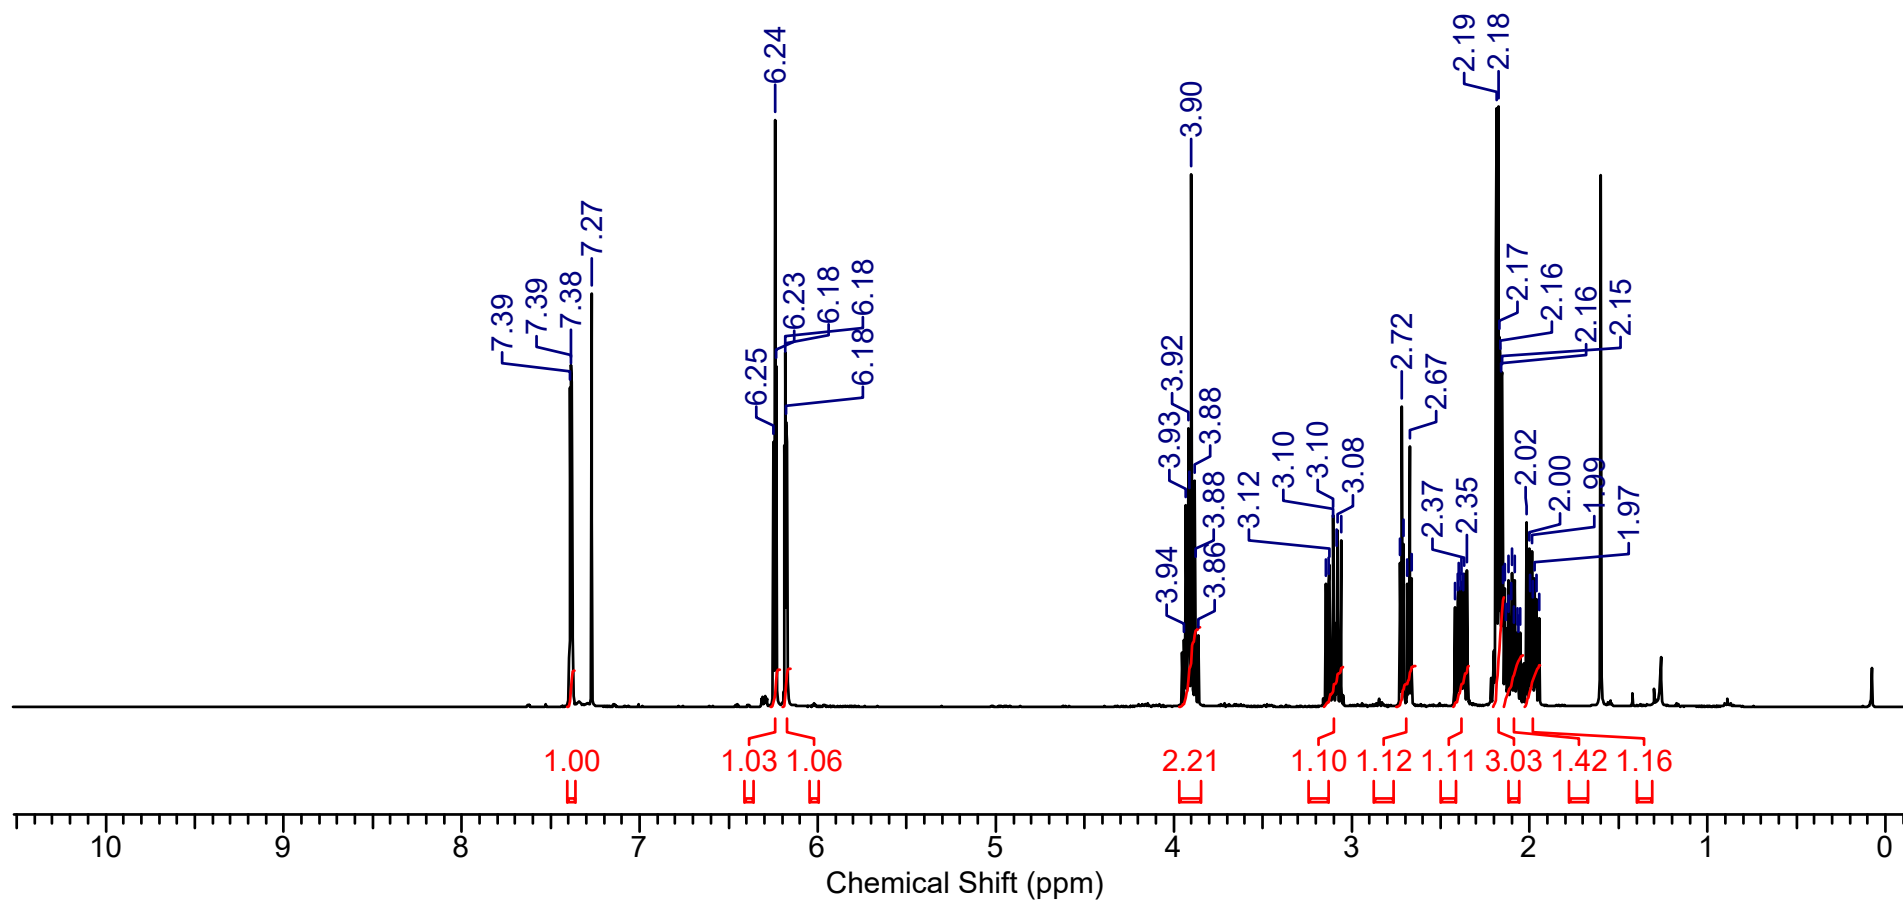

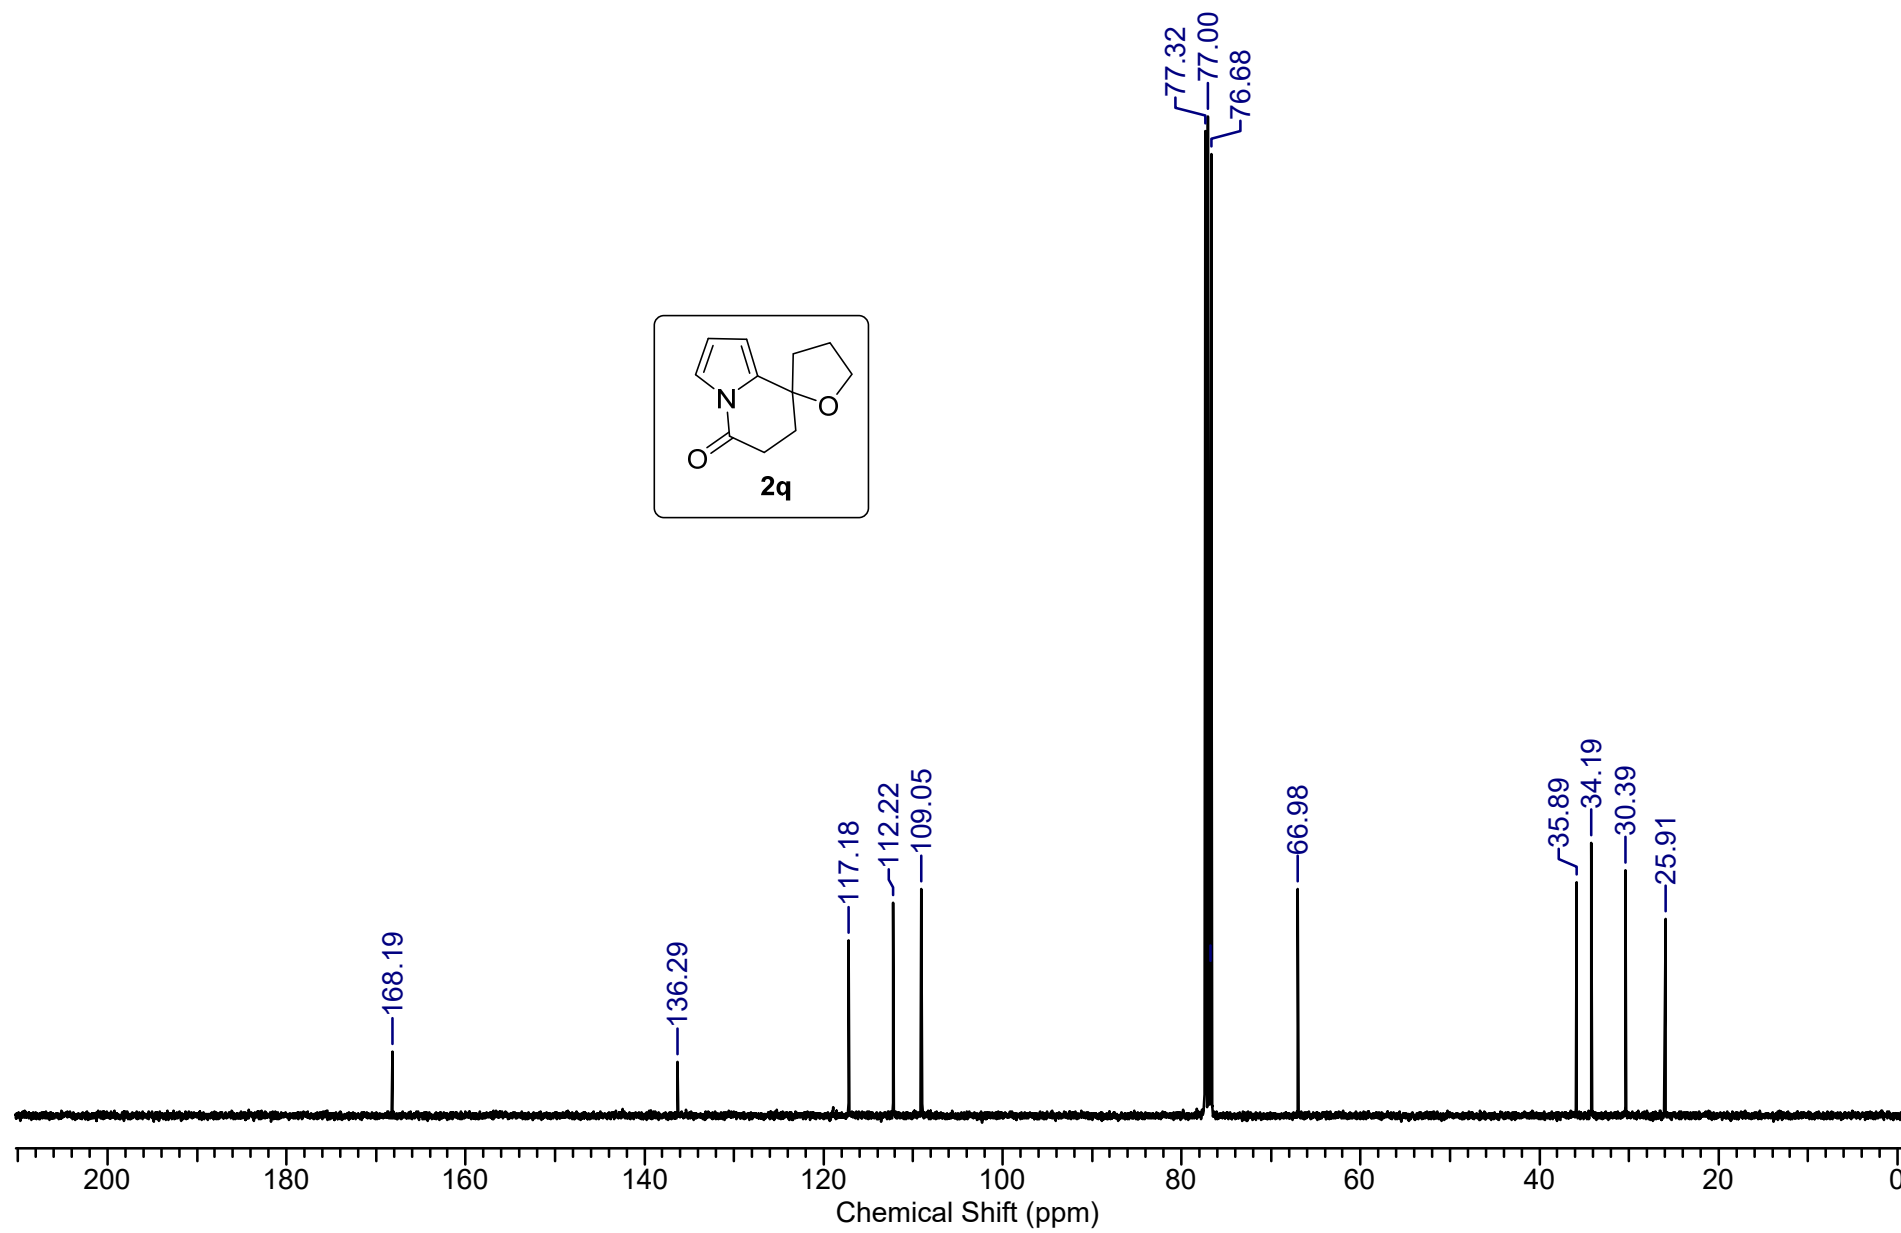

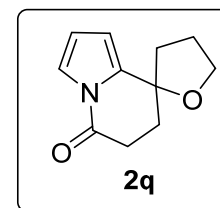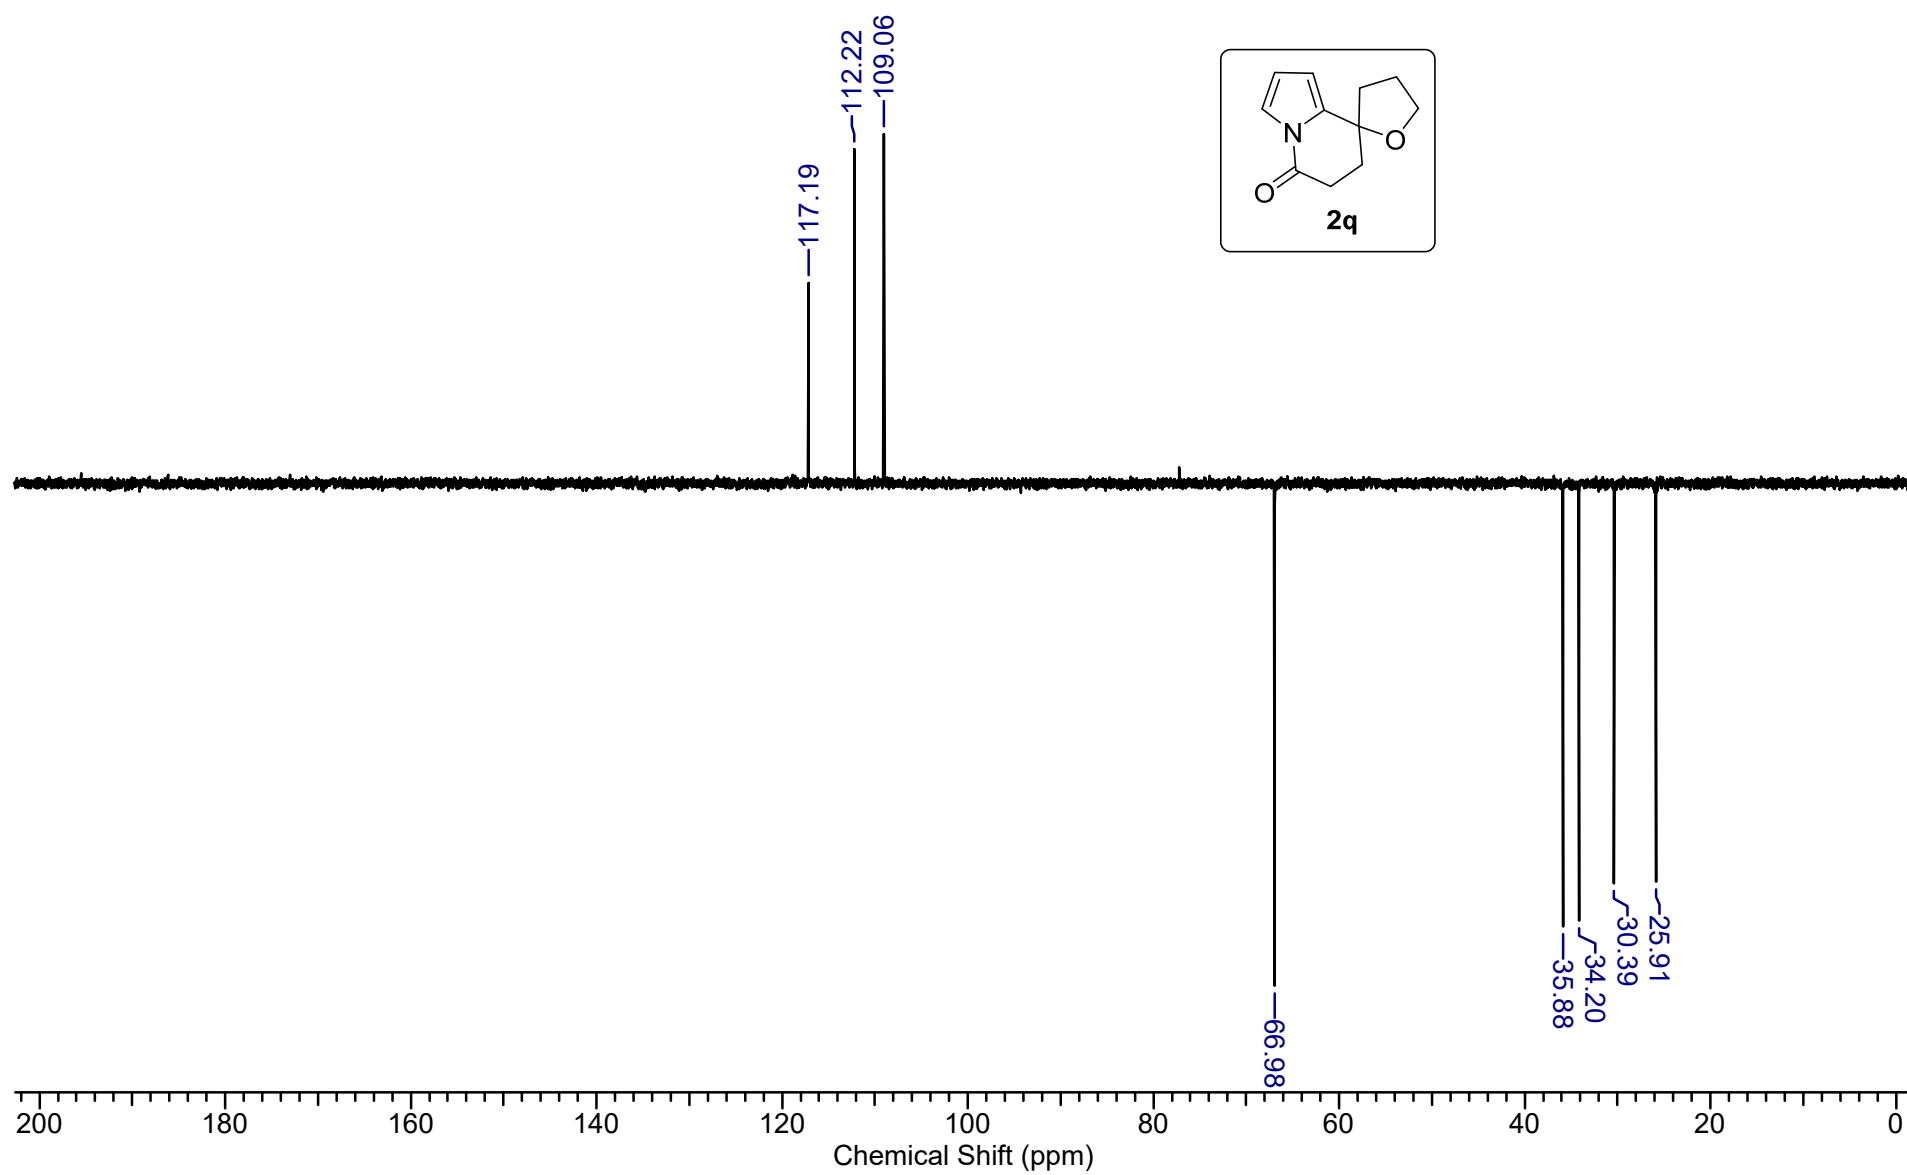



MS-14a #276 RT: 1.48 AV: 1 NL: 1.26E8  
T: FTMS + p ESI Full ms [100.0000-1500.0000]

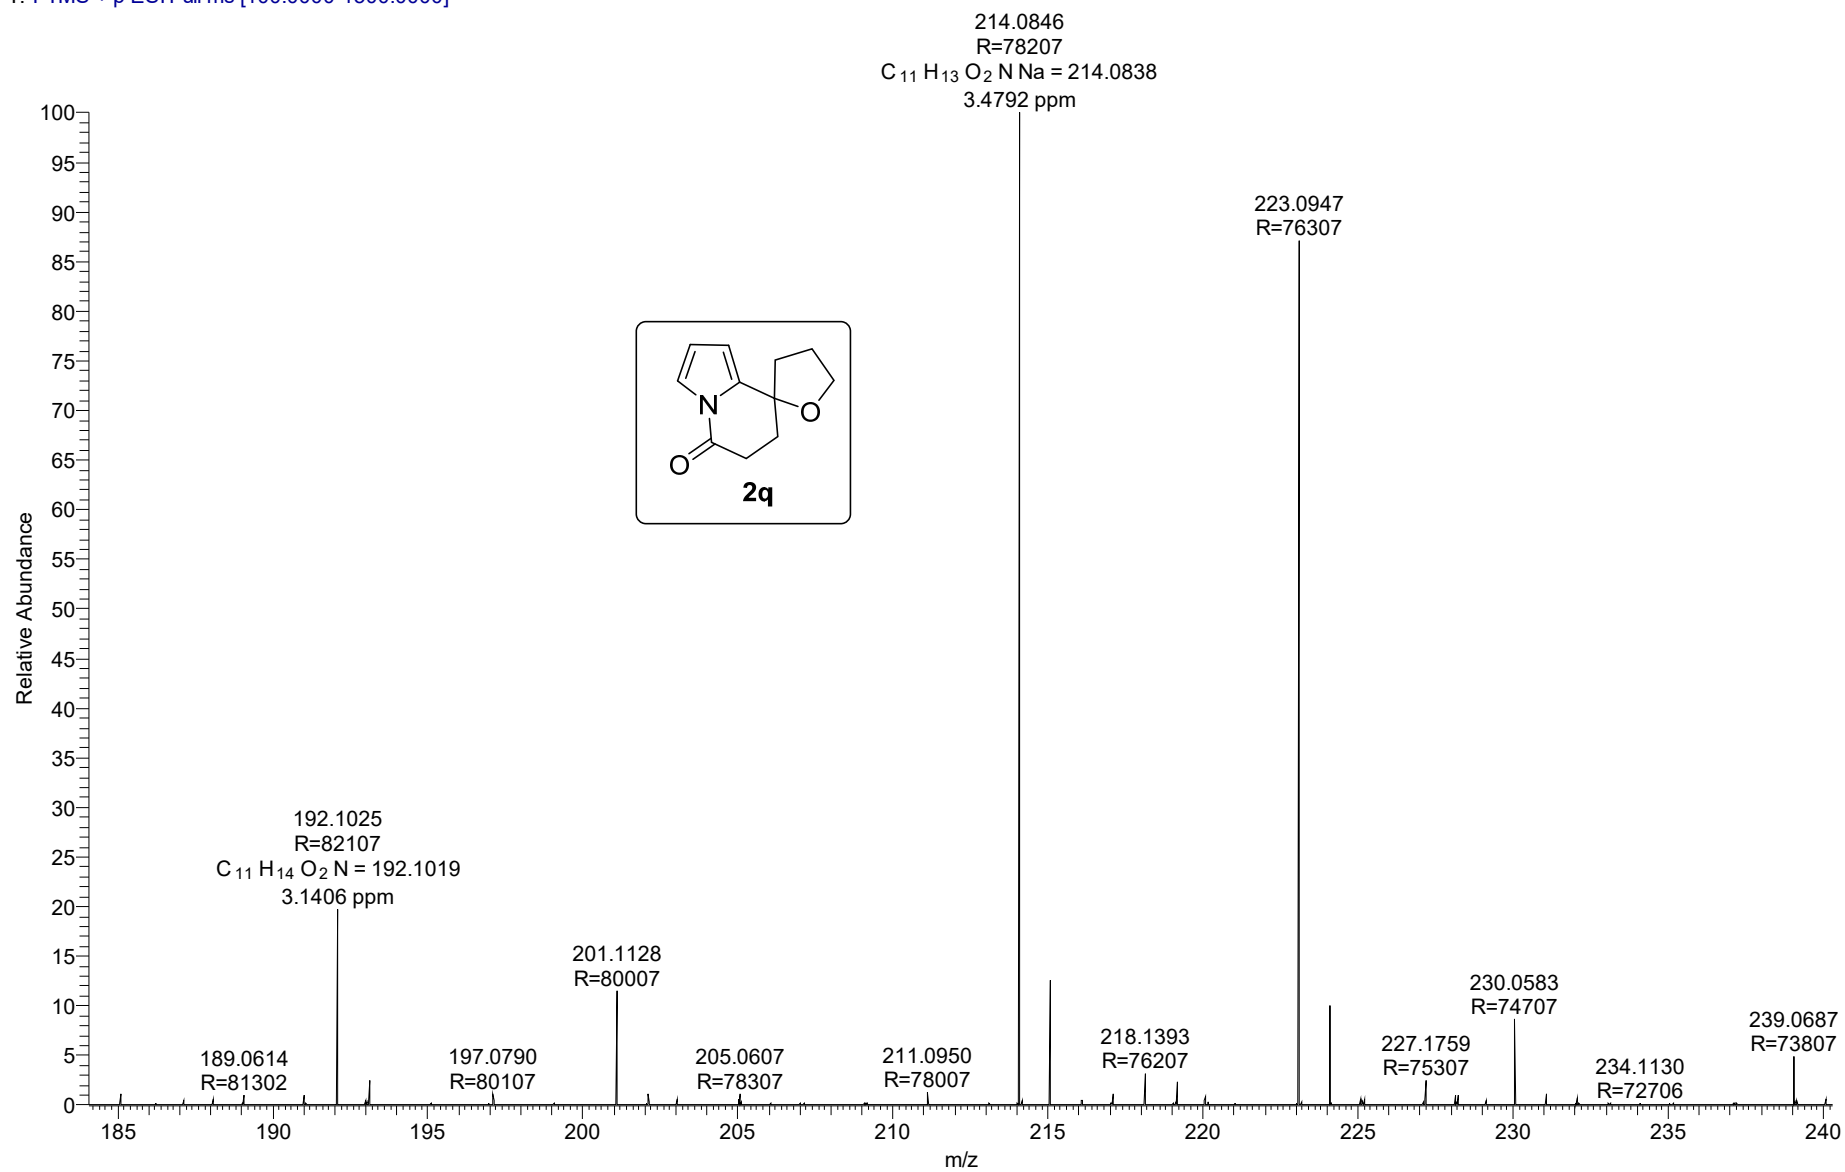

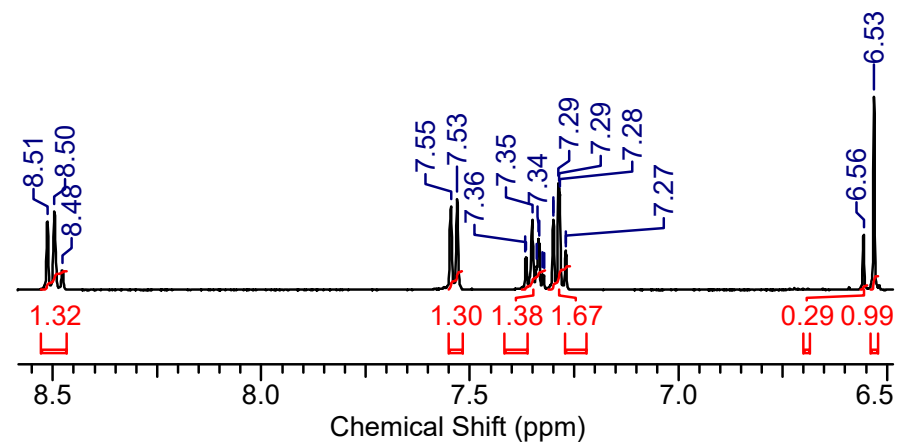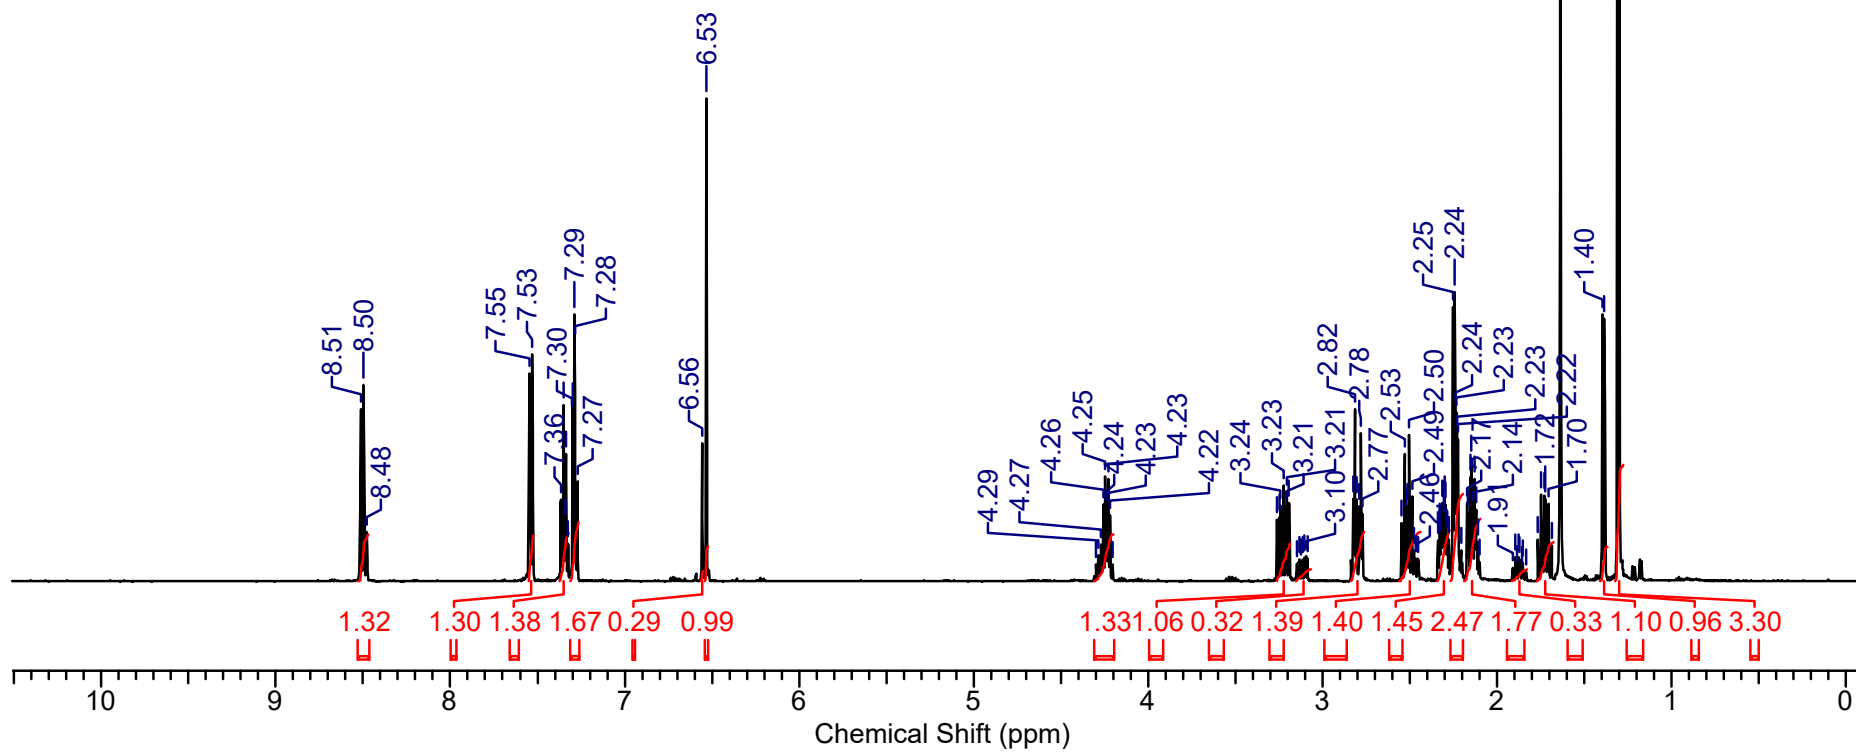

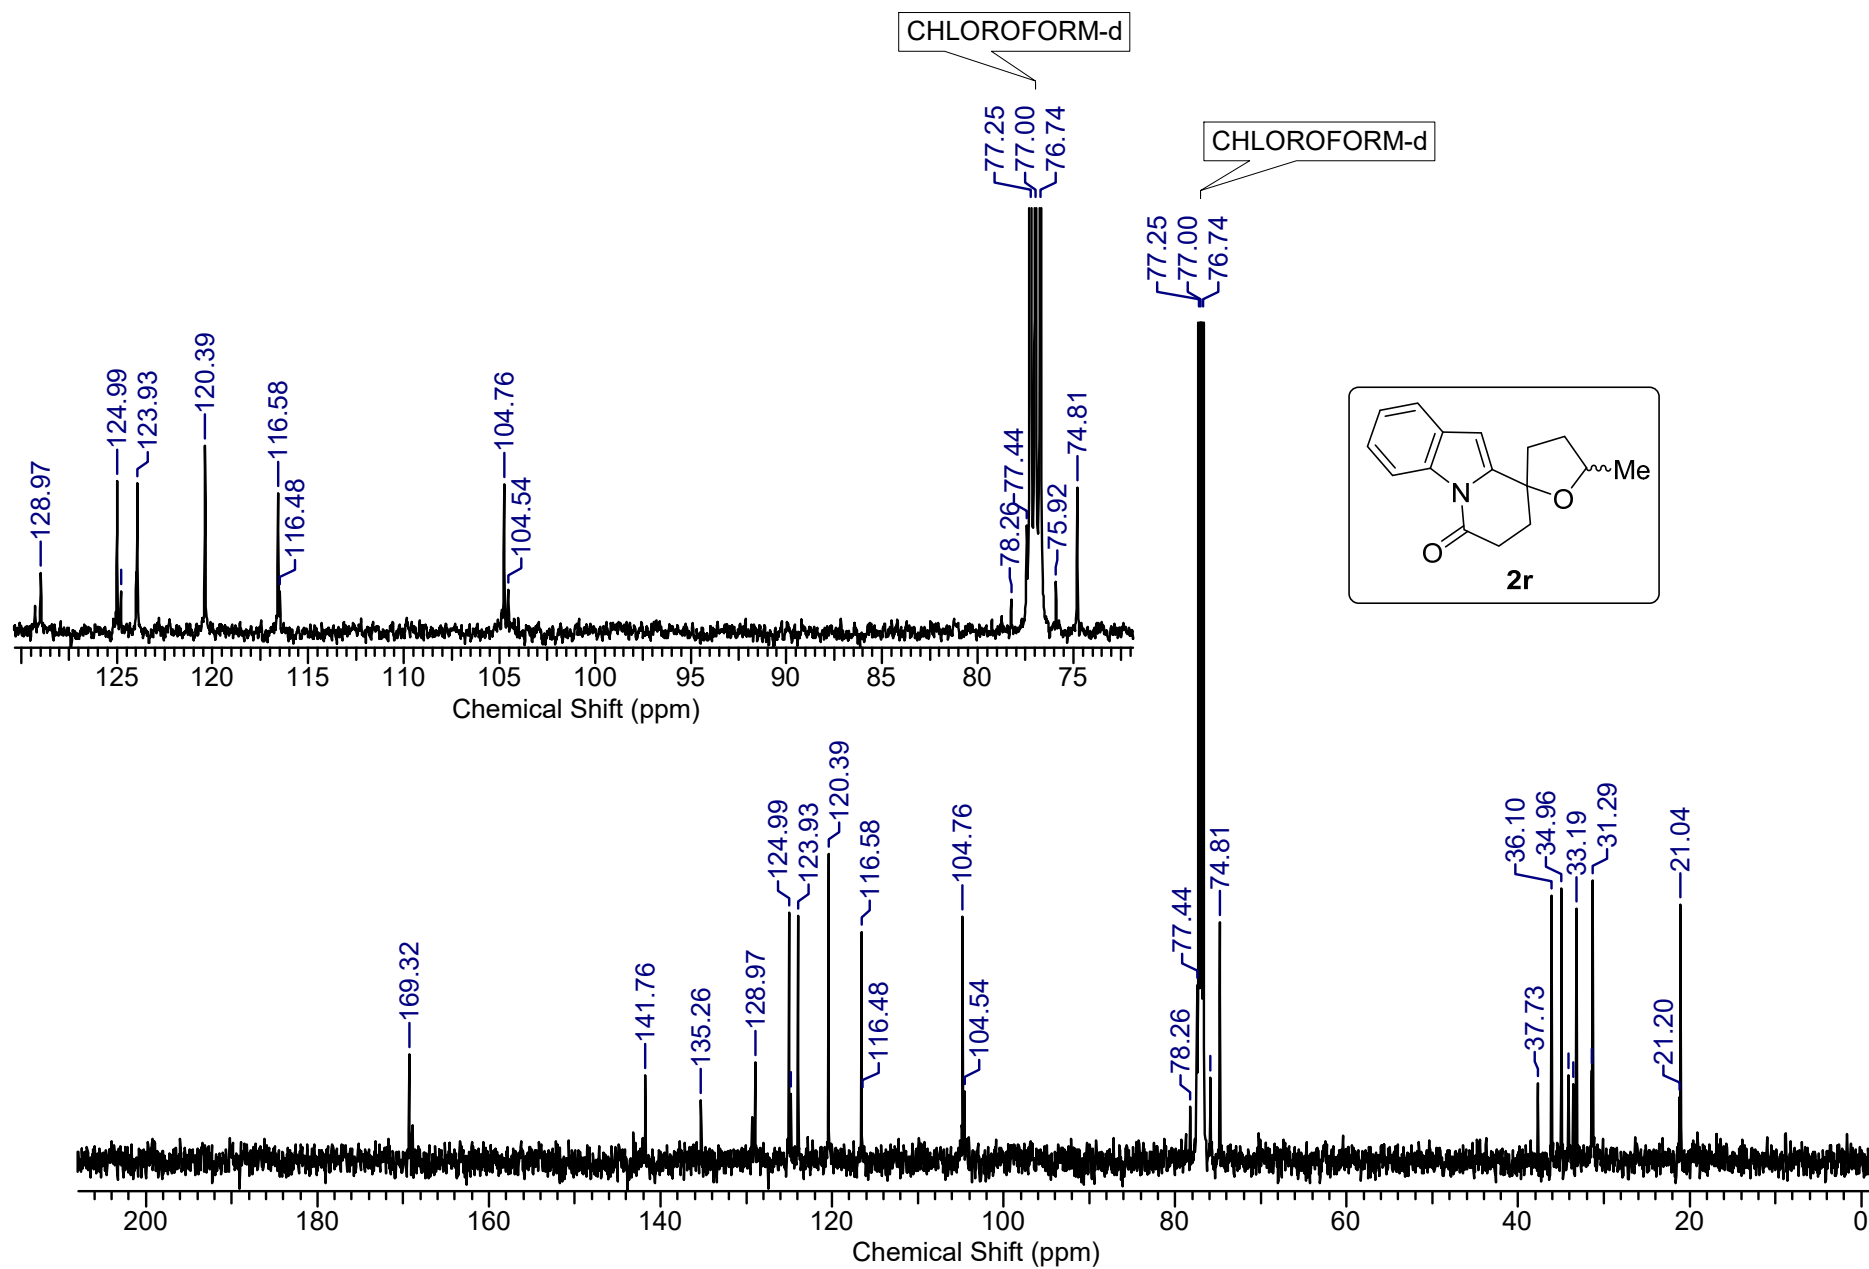

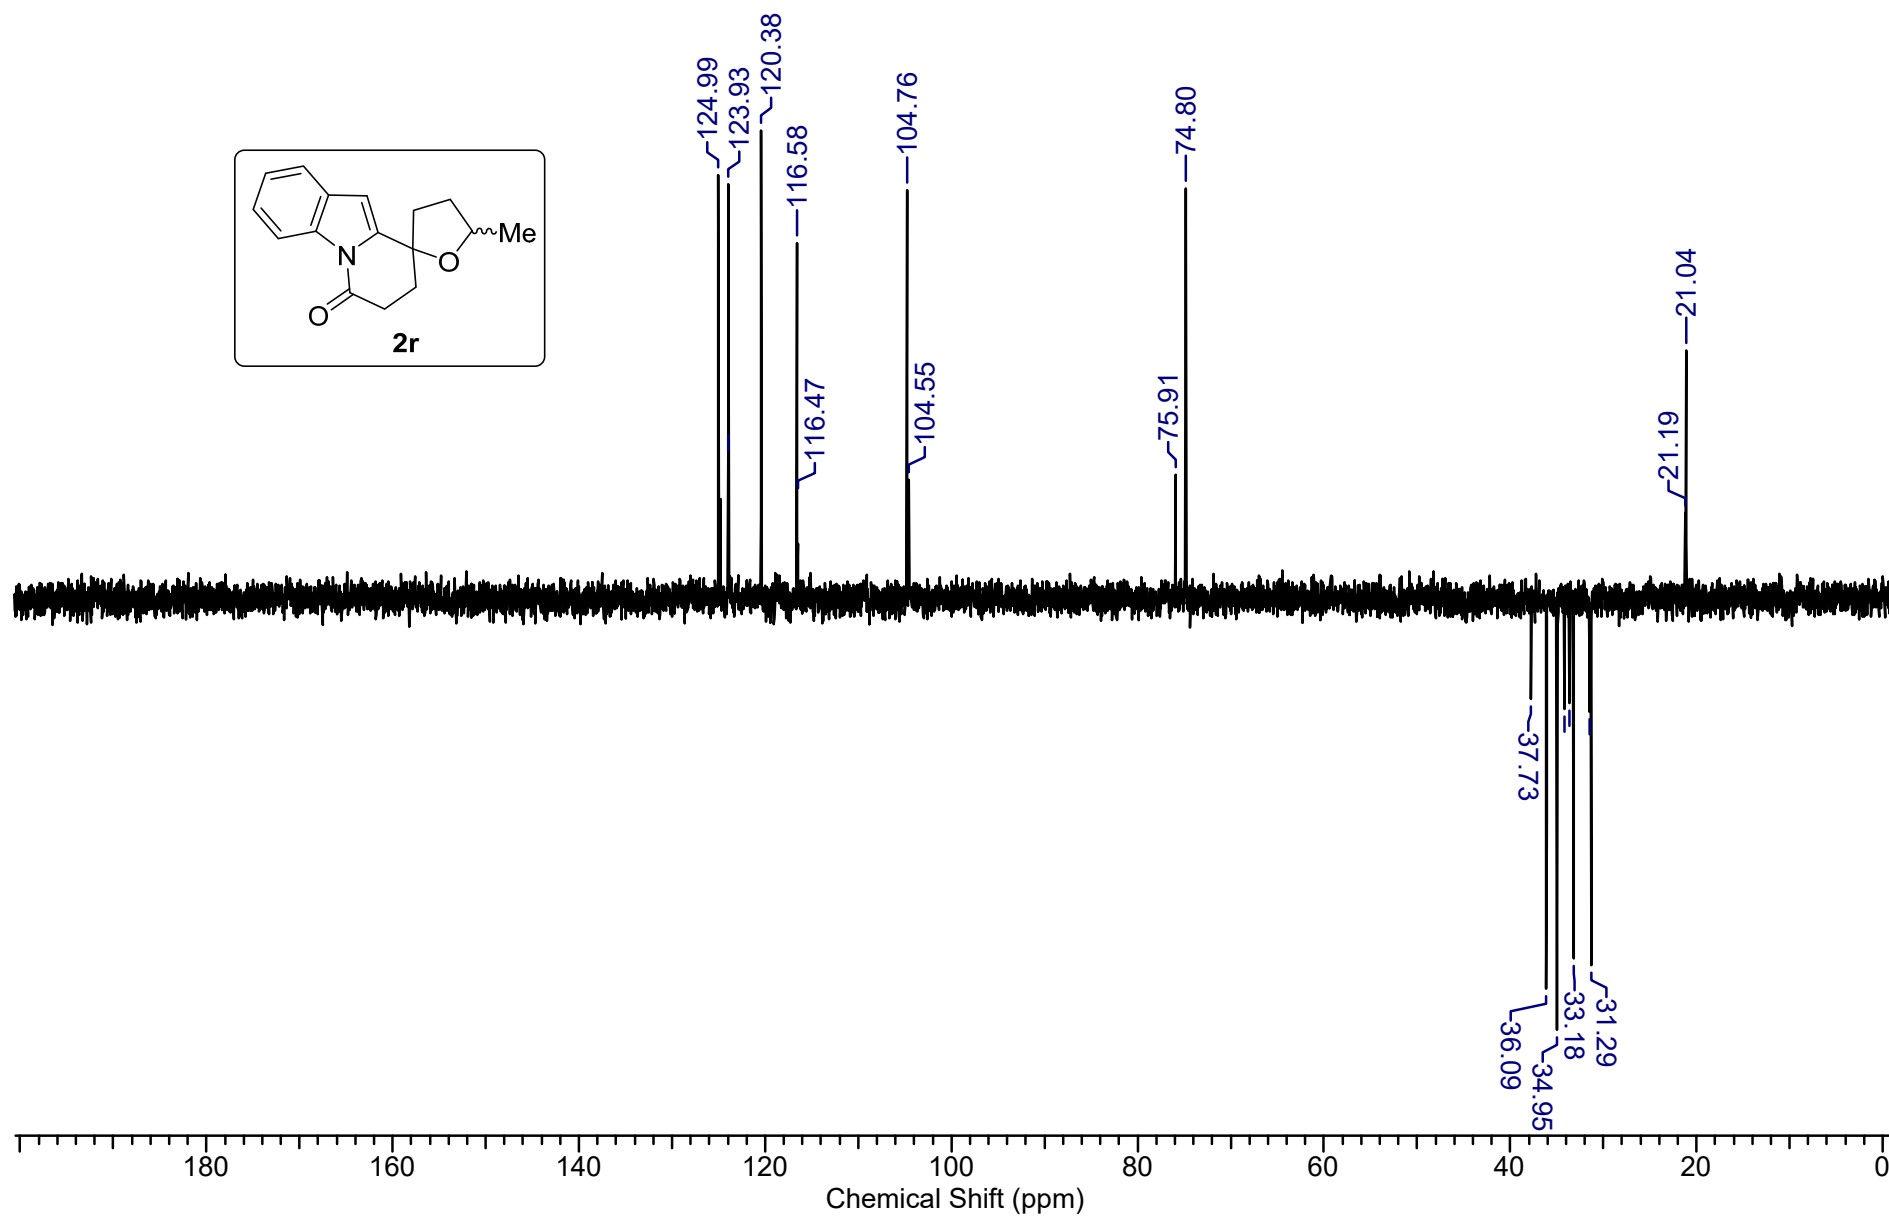

MSH-37 #374 RT: 2.03 AV: 1 NL: 3.36E7  
T: FTMS + p ESI Full ms [100.0000-1500.0000]

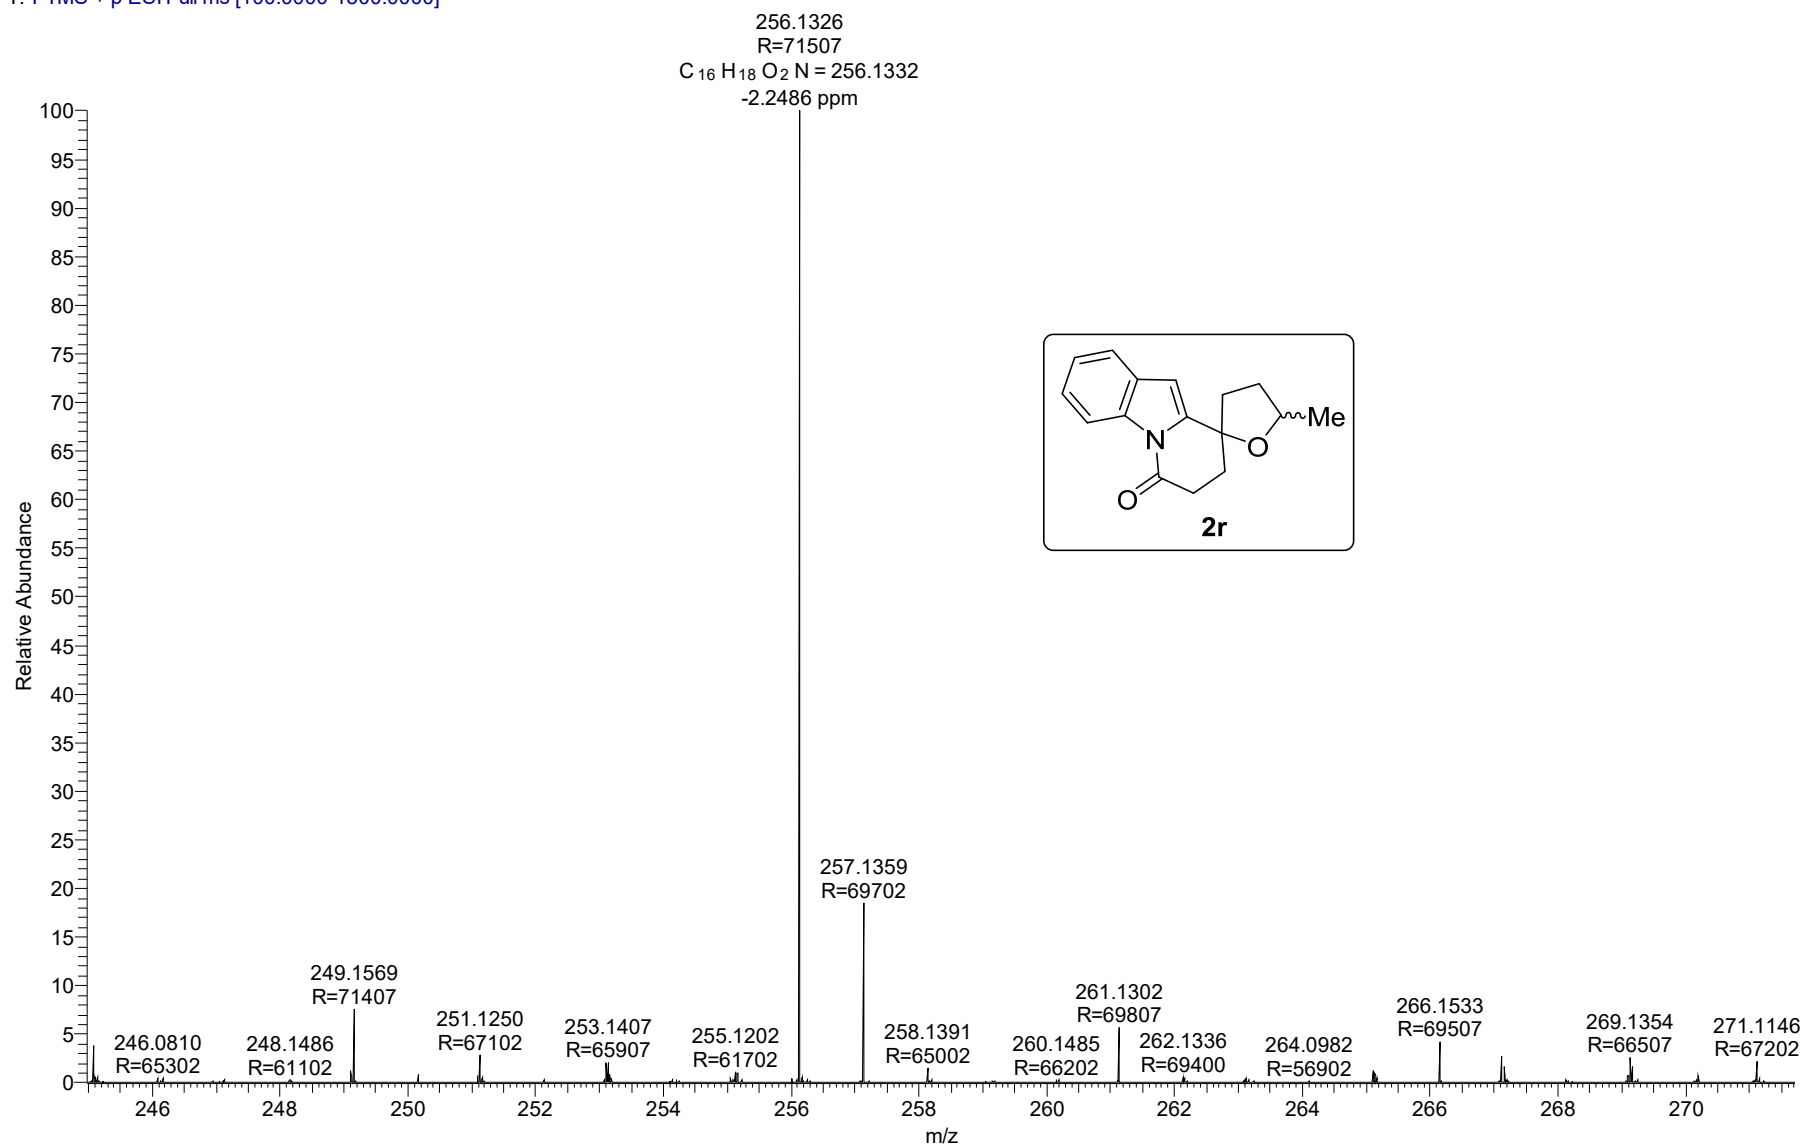

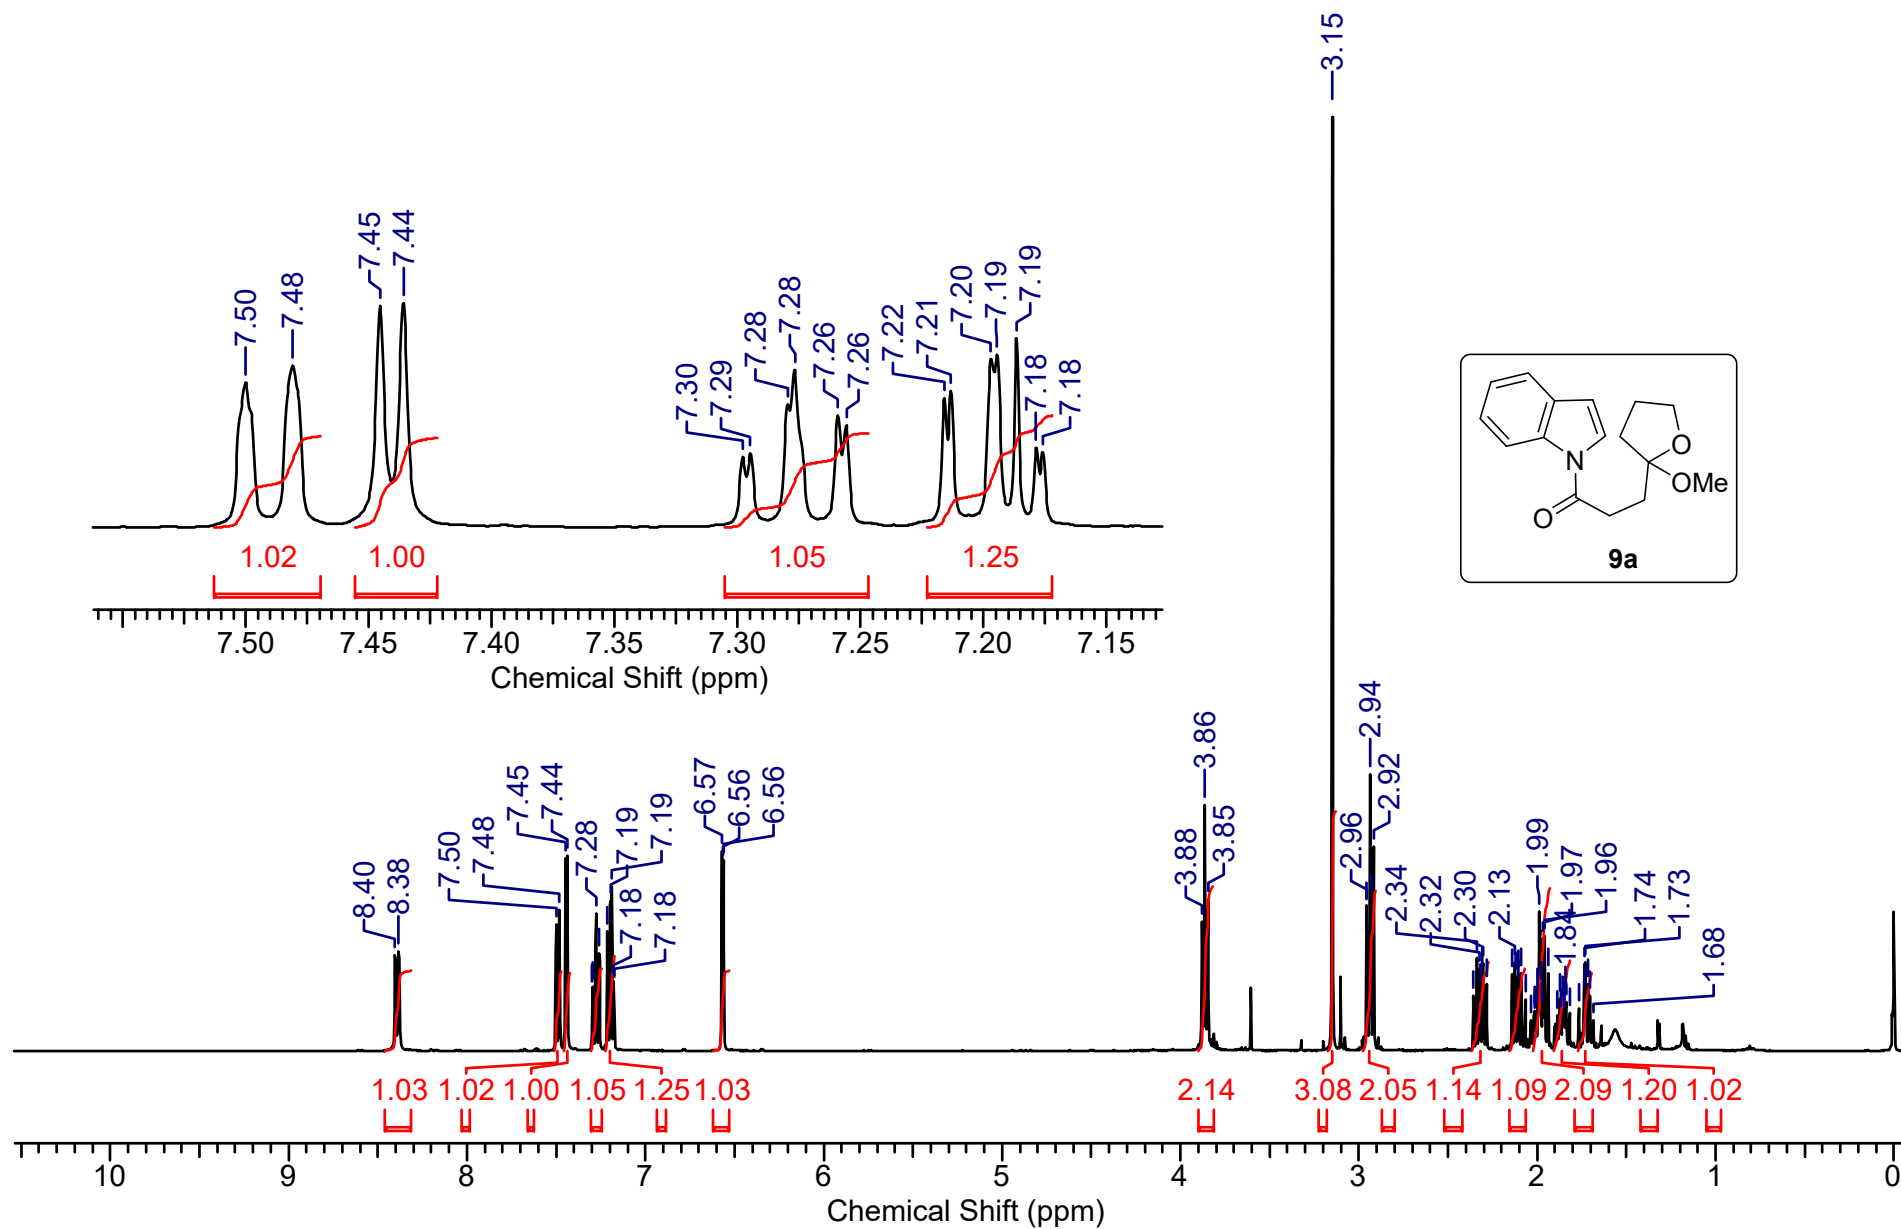

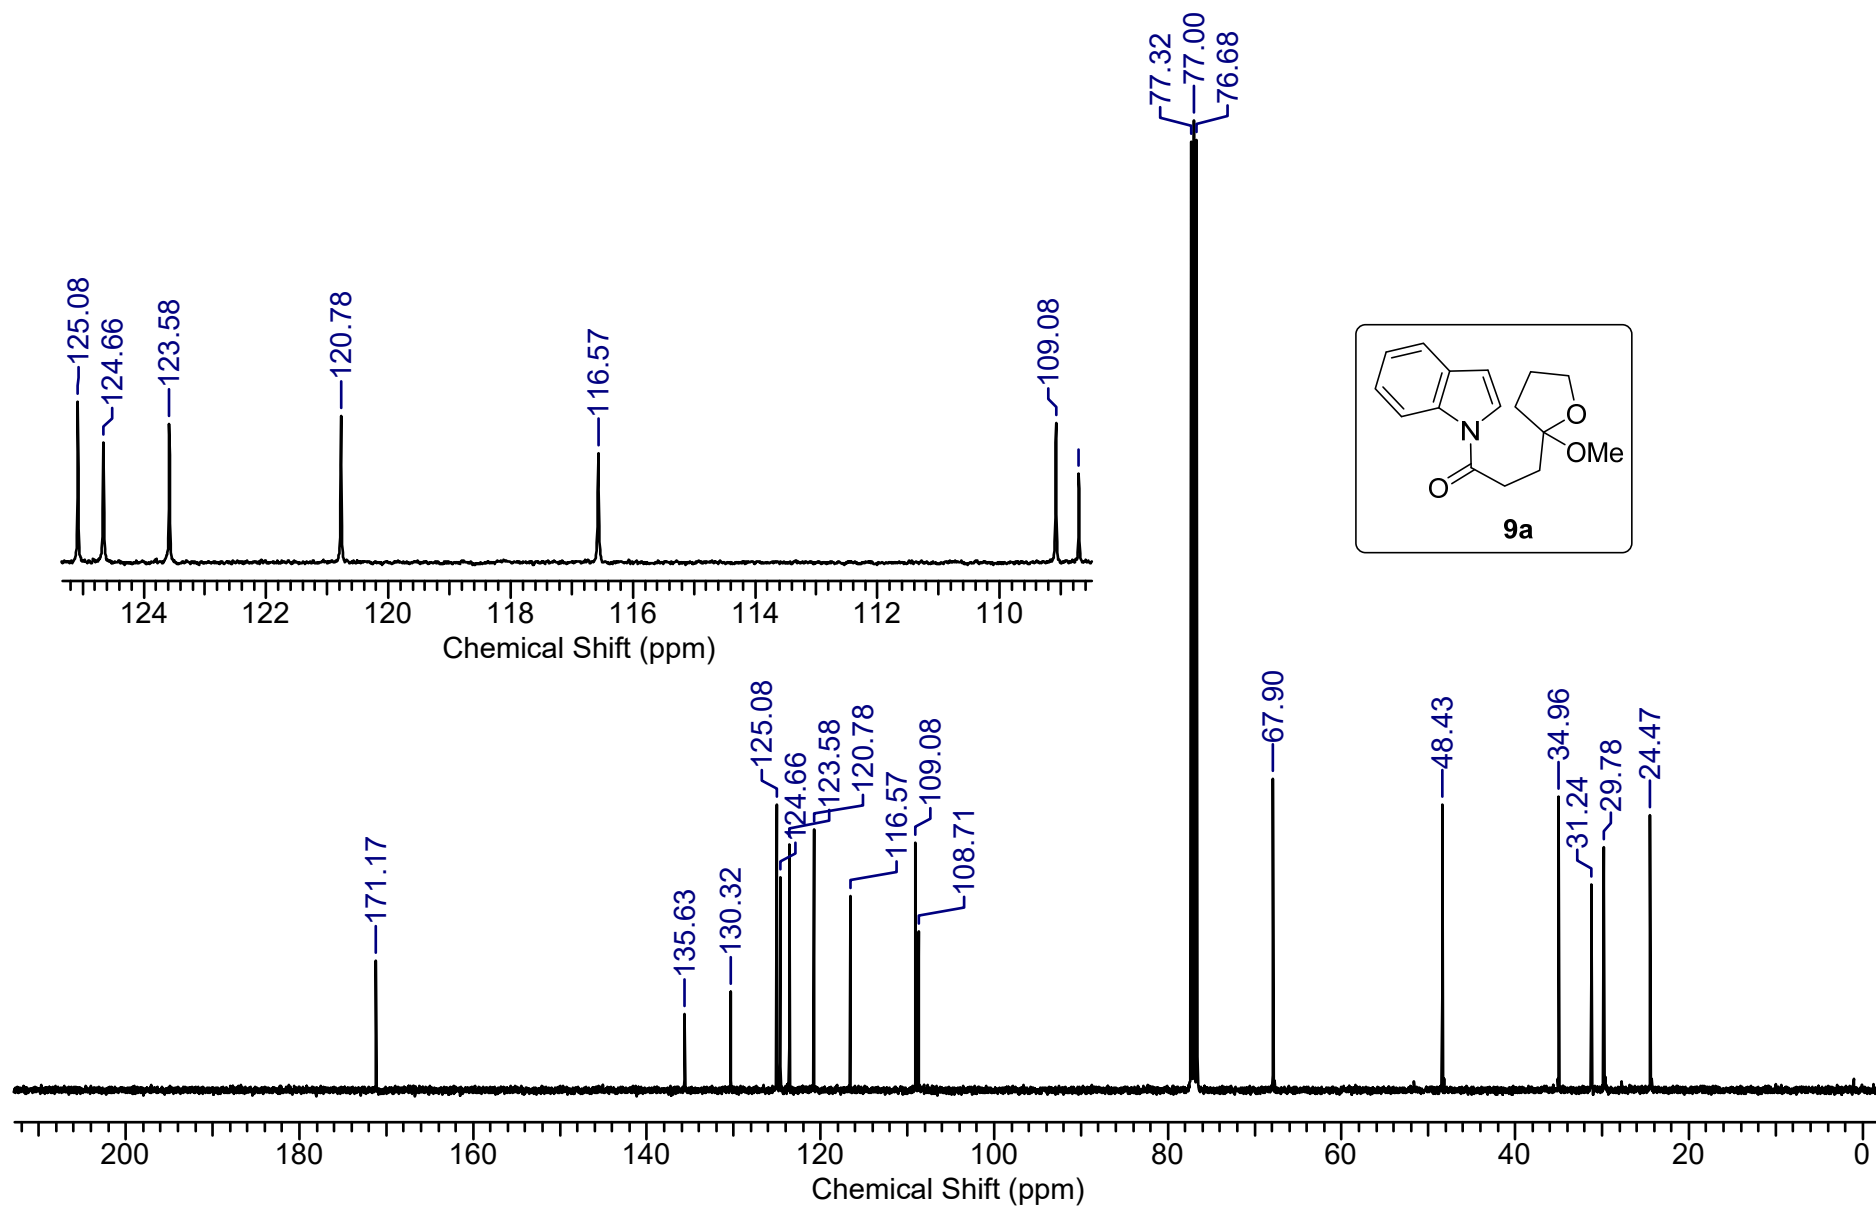

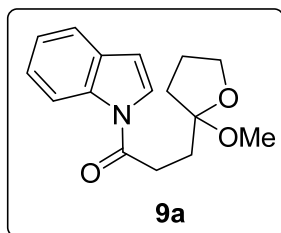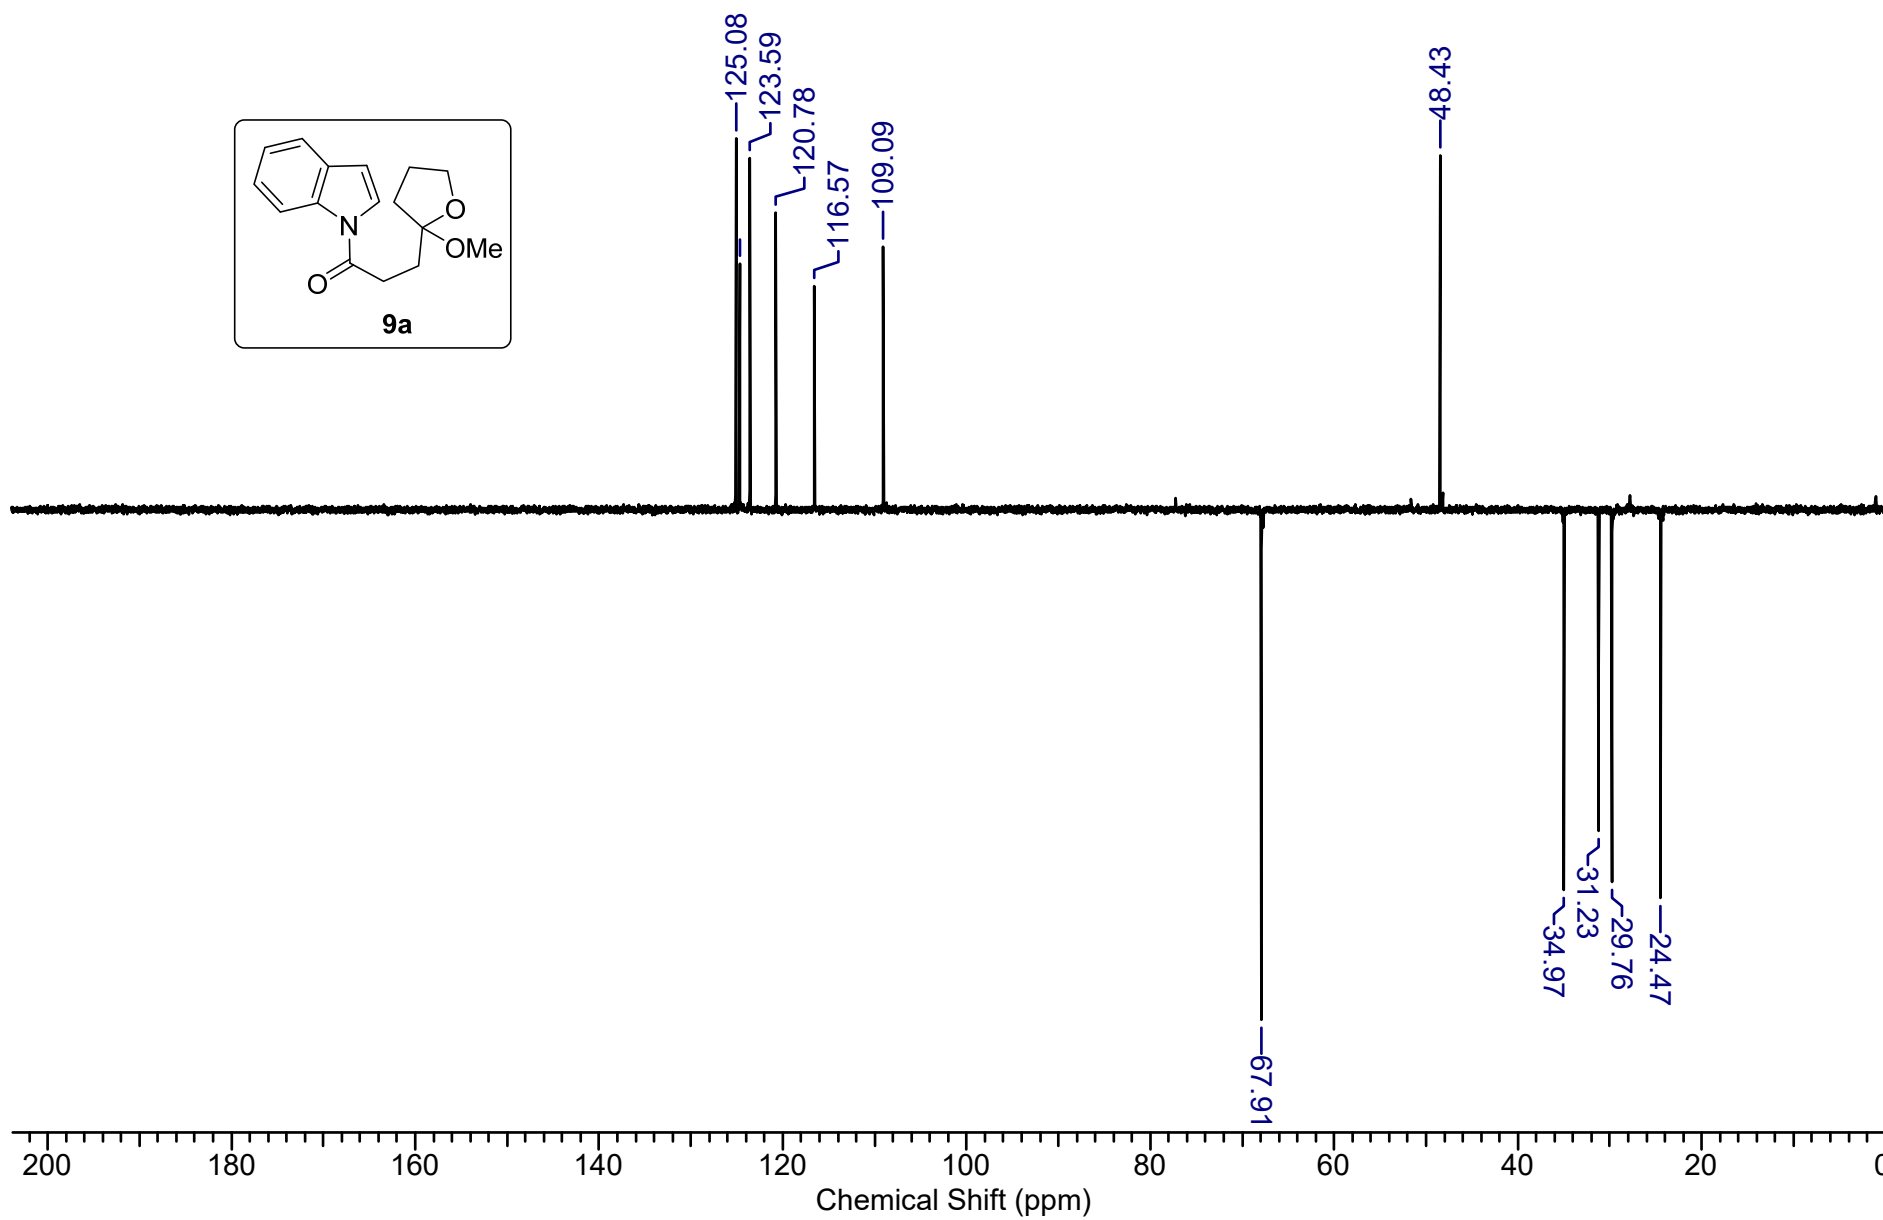



MSH-1 #318 RT: 1.71 AV: 1 NL: 3.59E8  
T: FTMS + p ESI Full ms [100.0000-1500.0000]

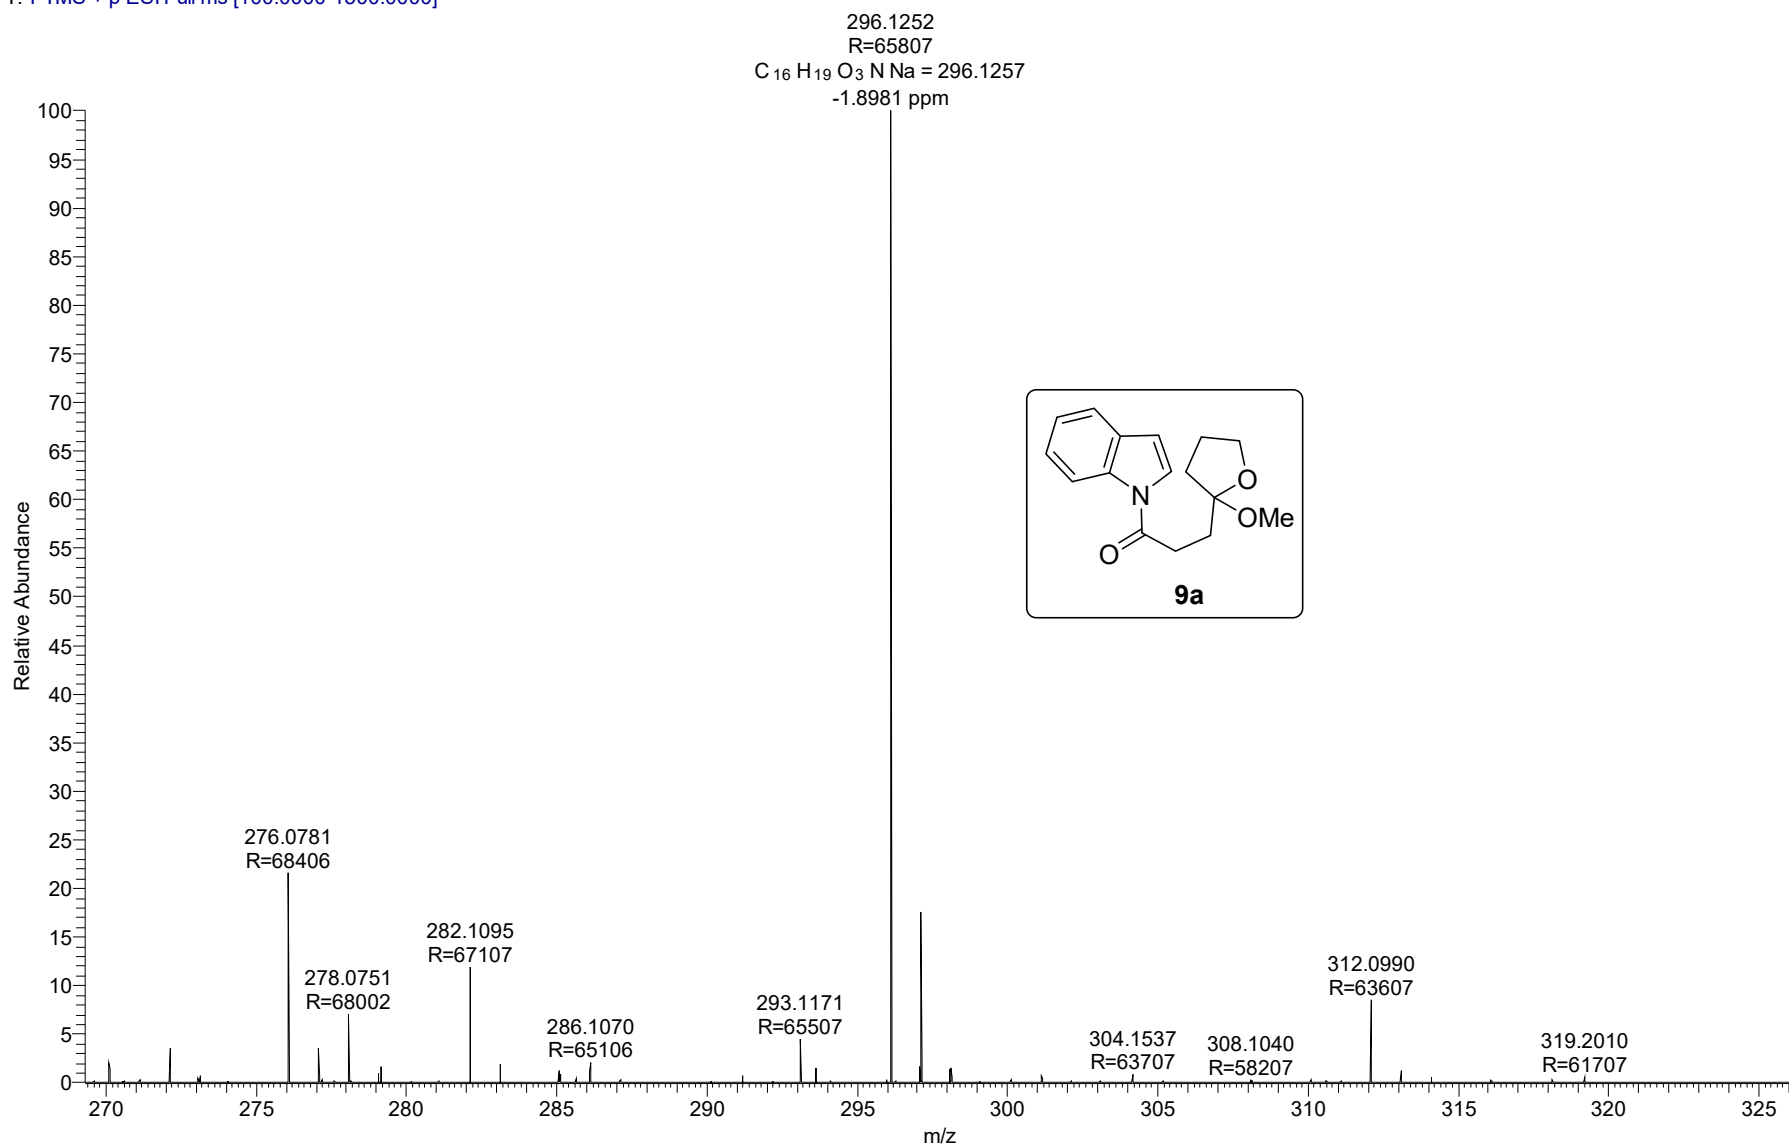

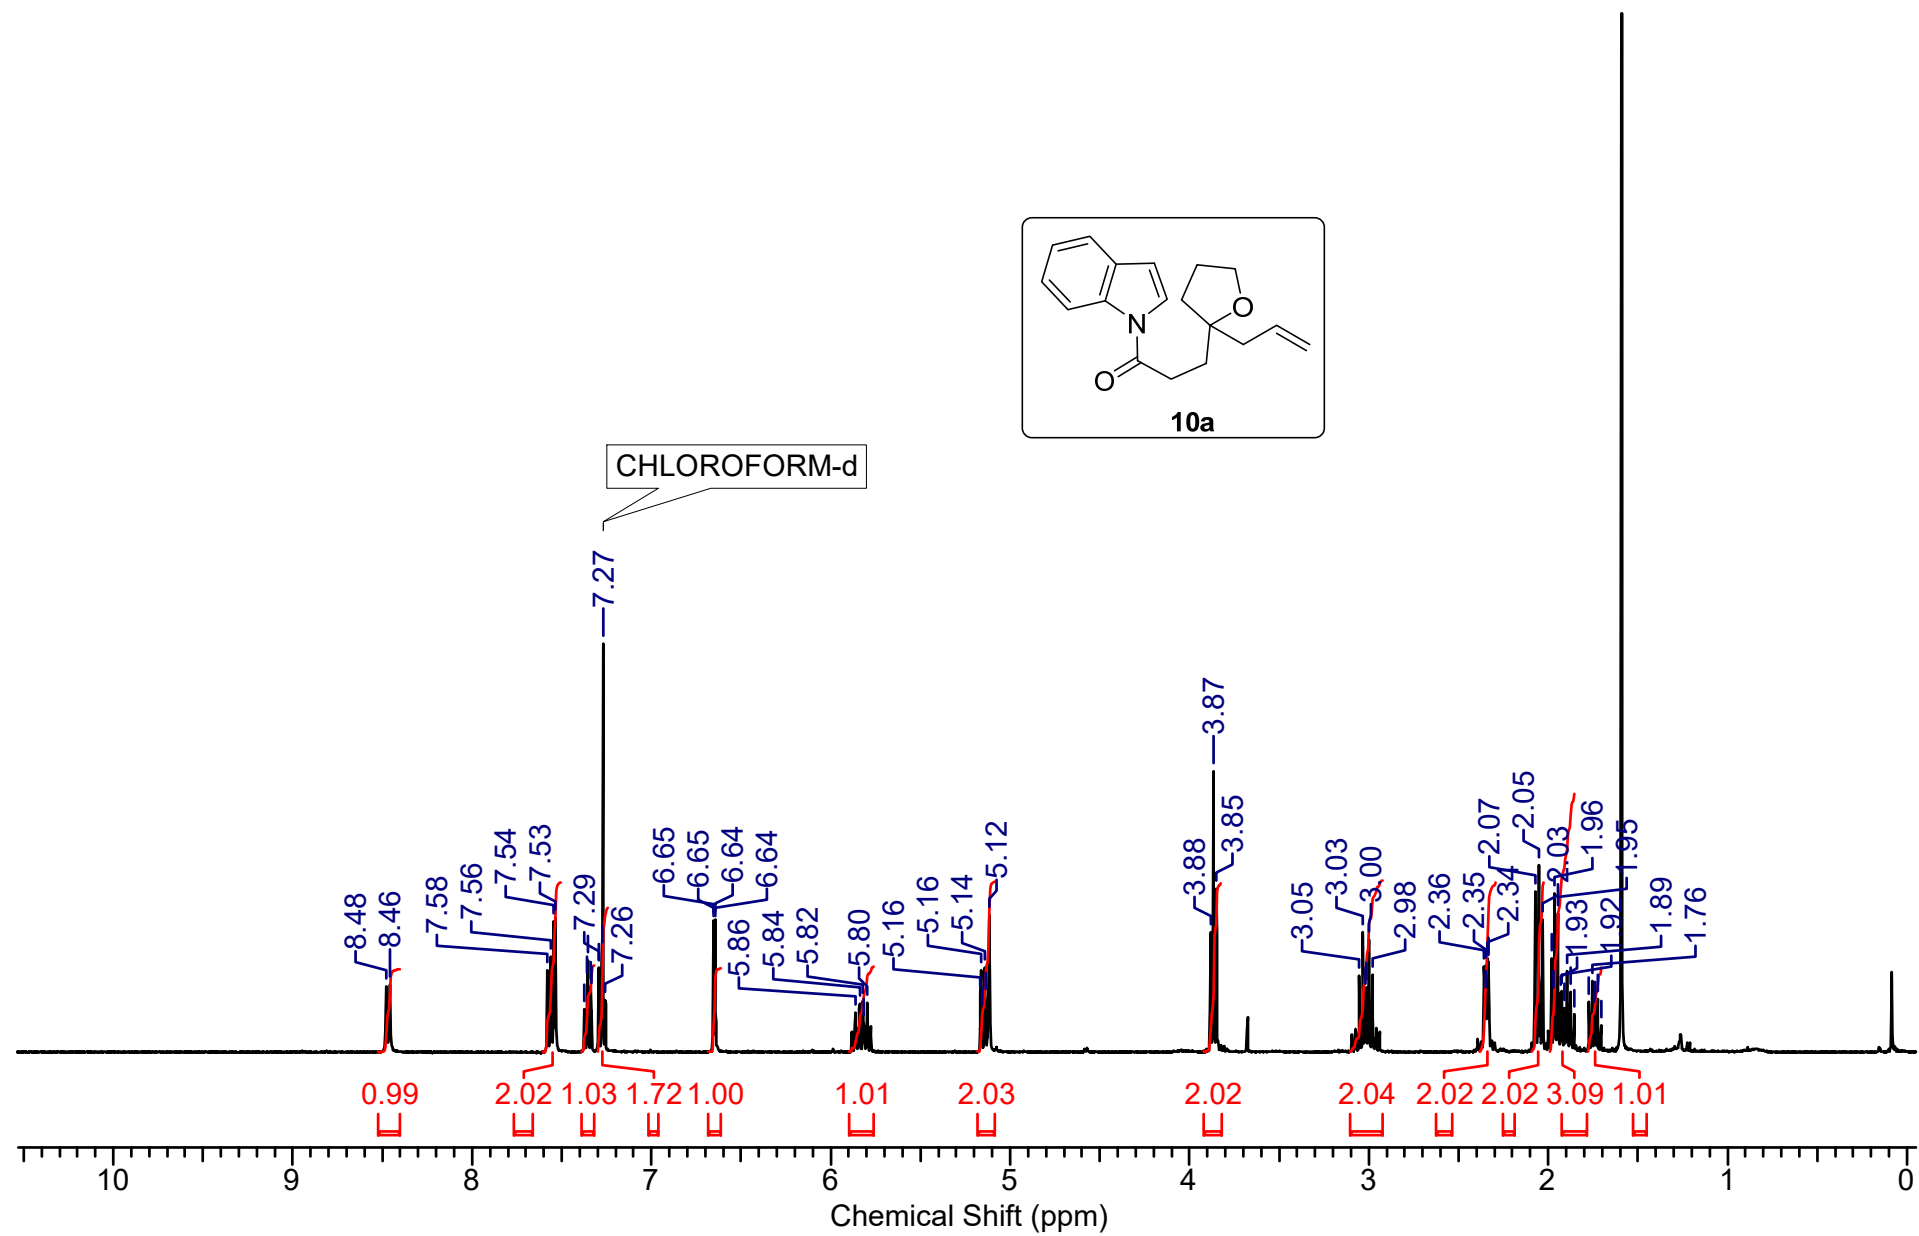

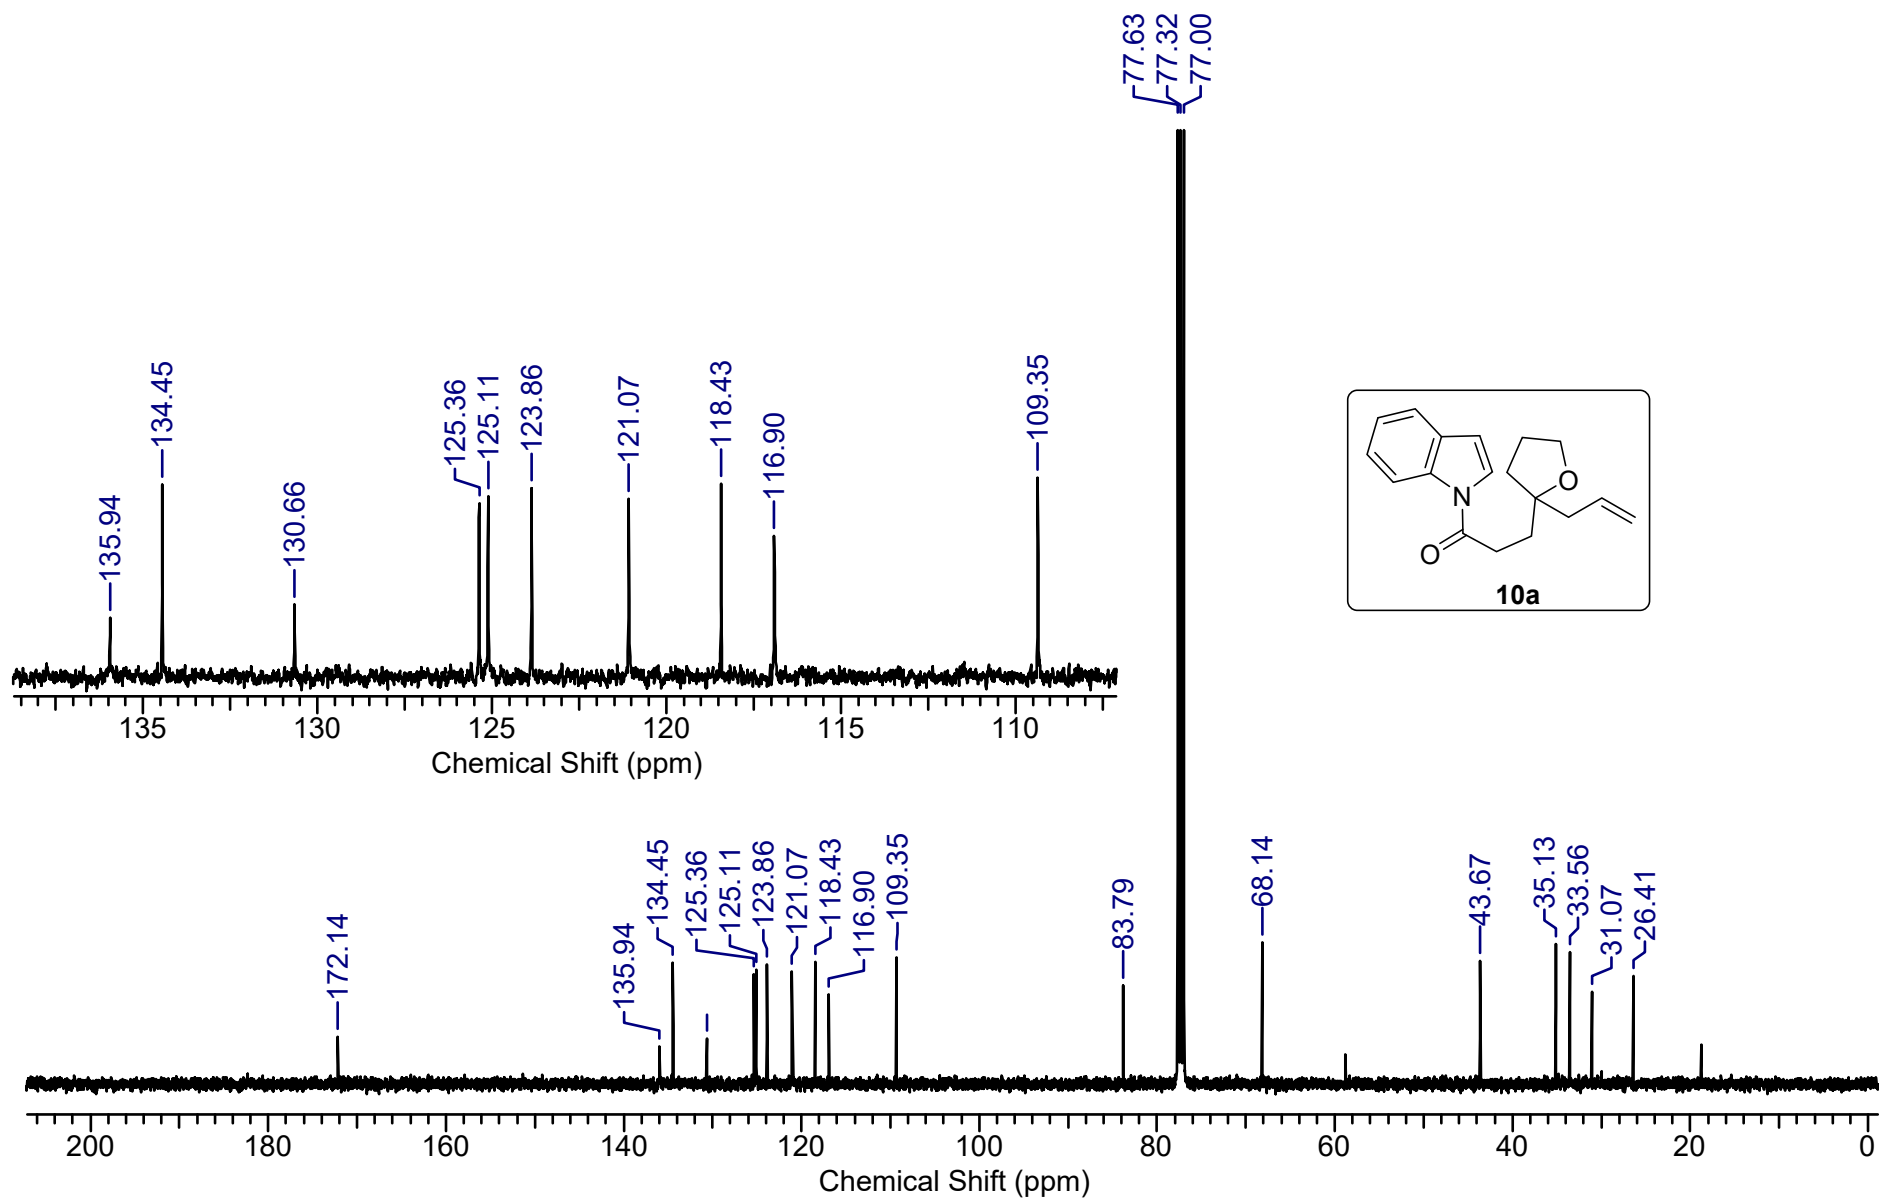

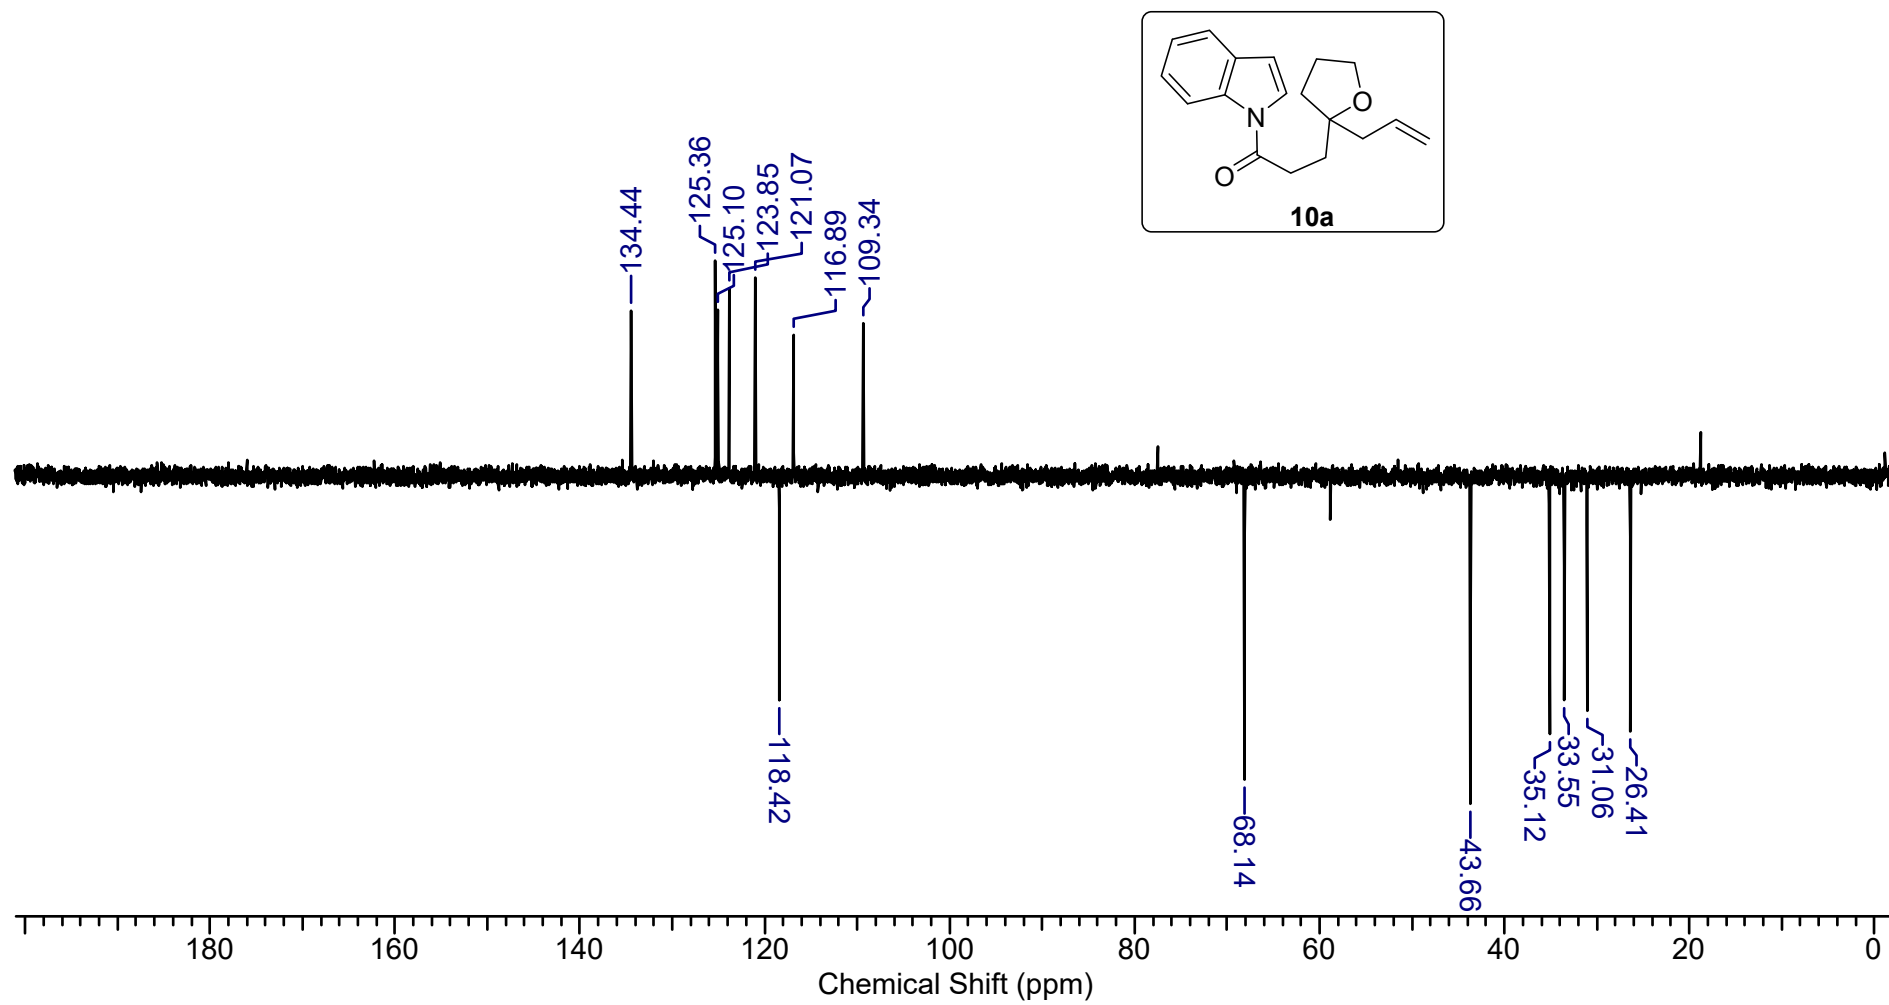

MS-16 #316 RT: 1.69 AV: 1 NL: 1.45E8  
T: FTMS + p ESI Full ms [100.0000-1500.0000]

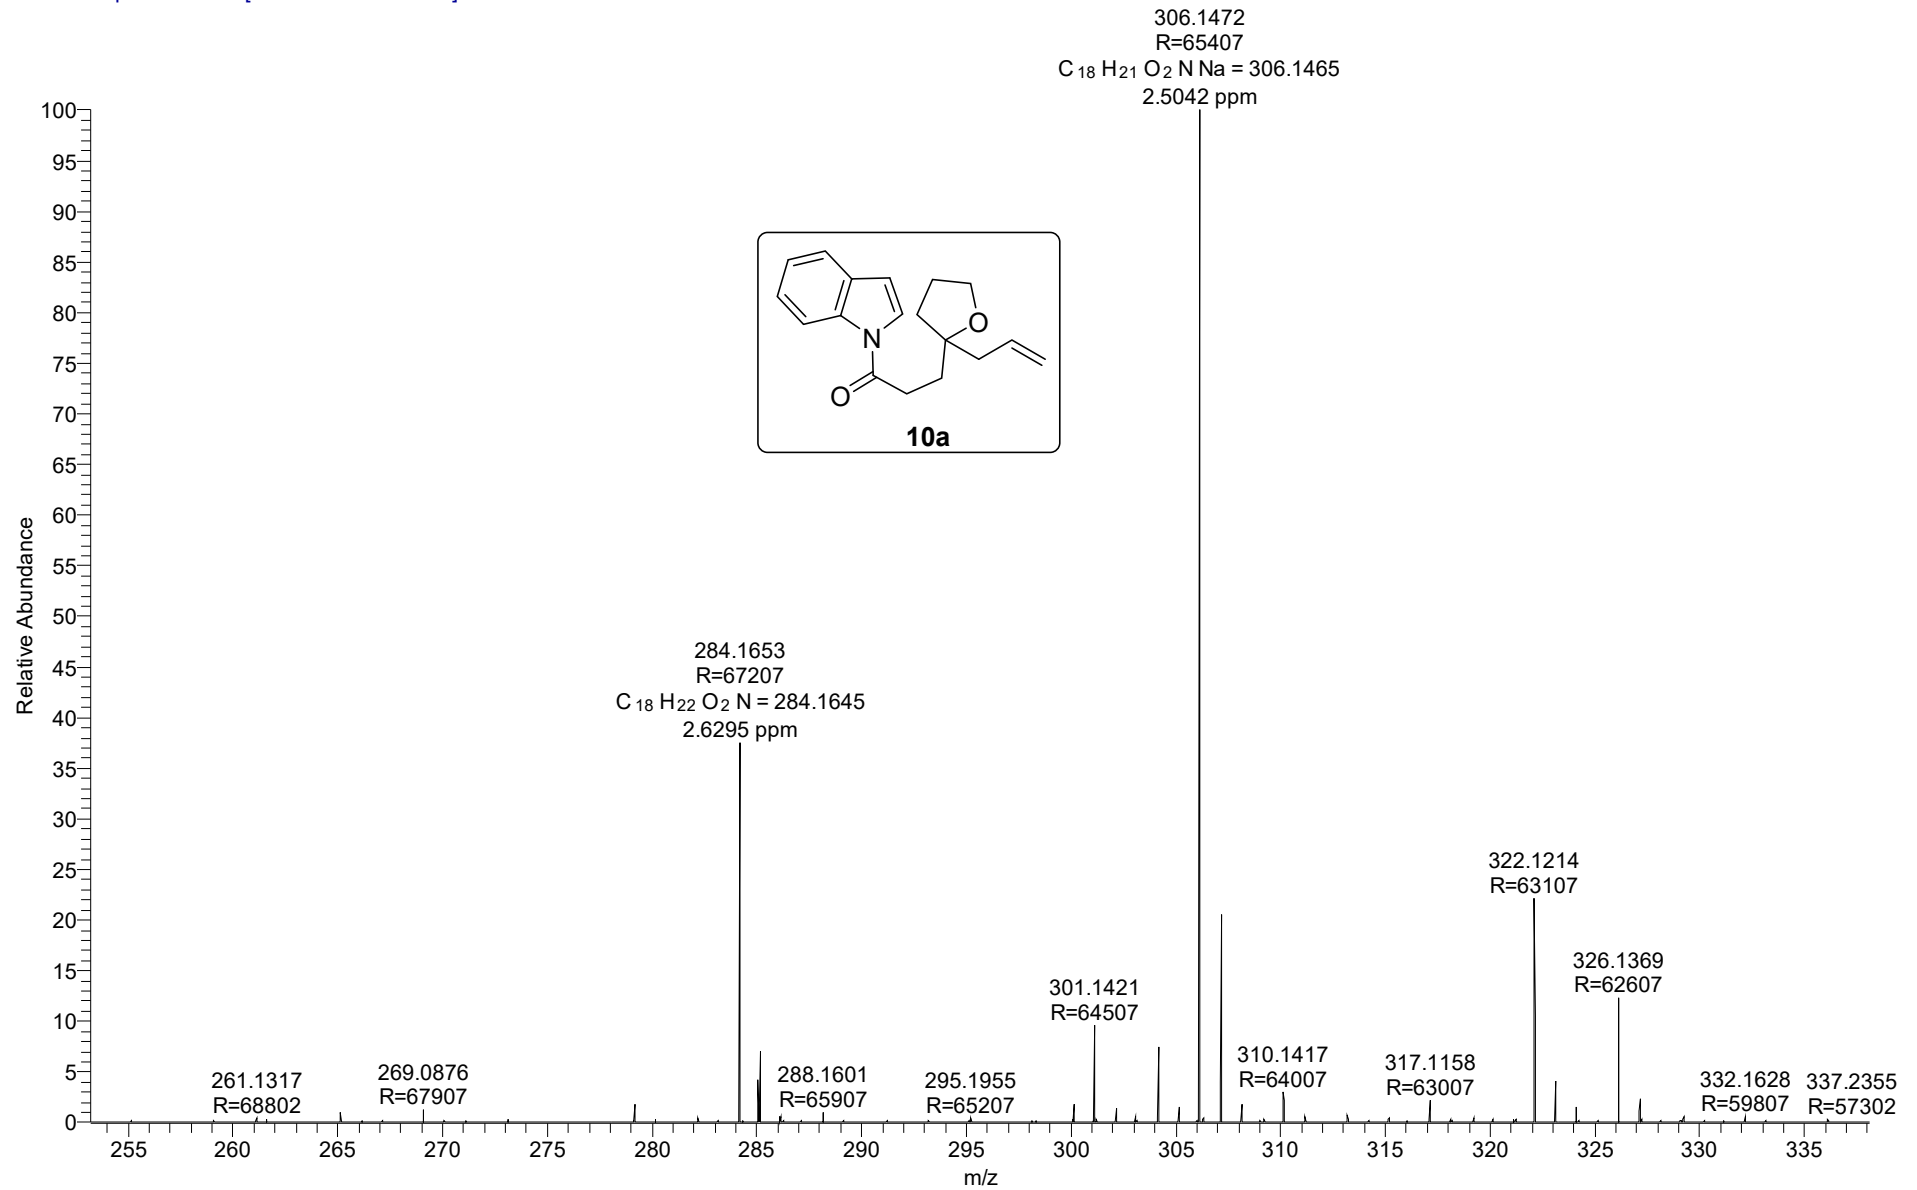

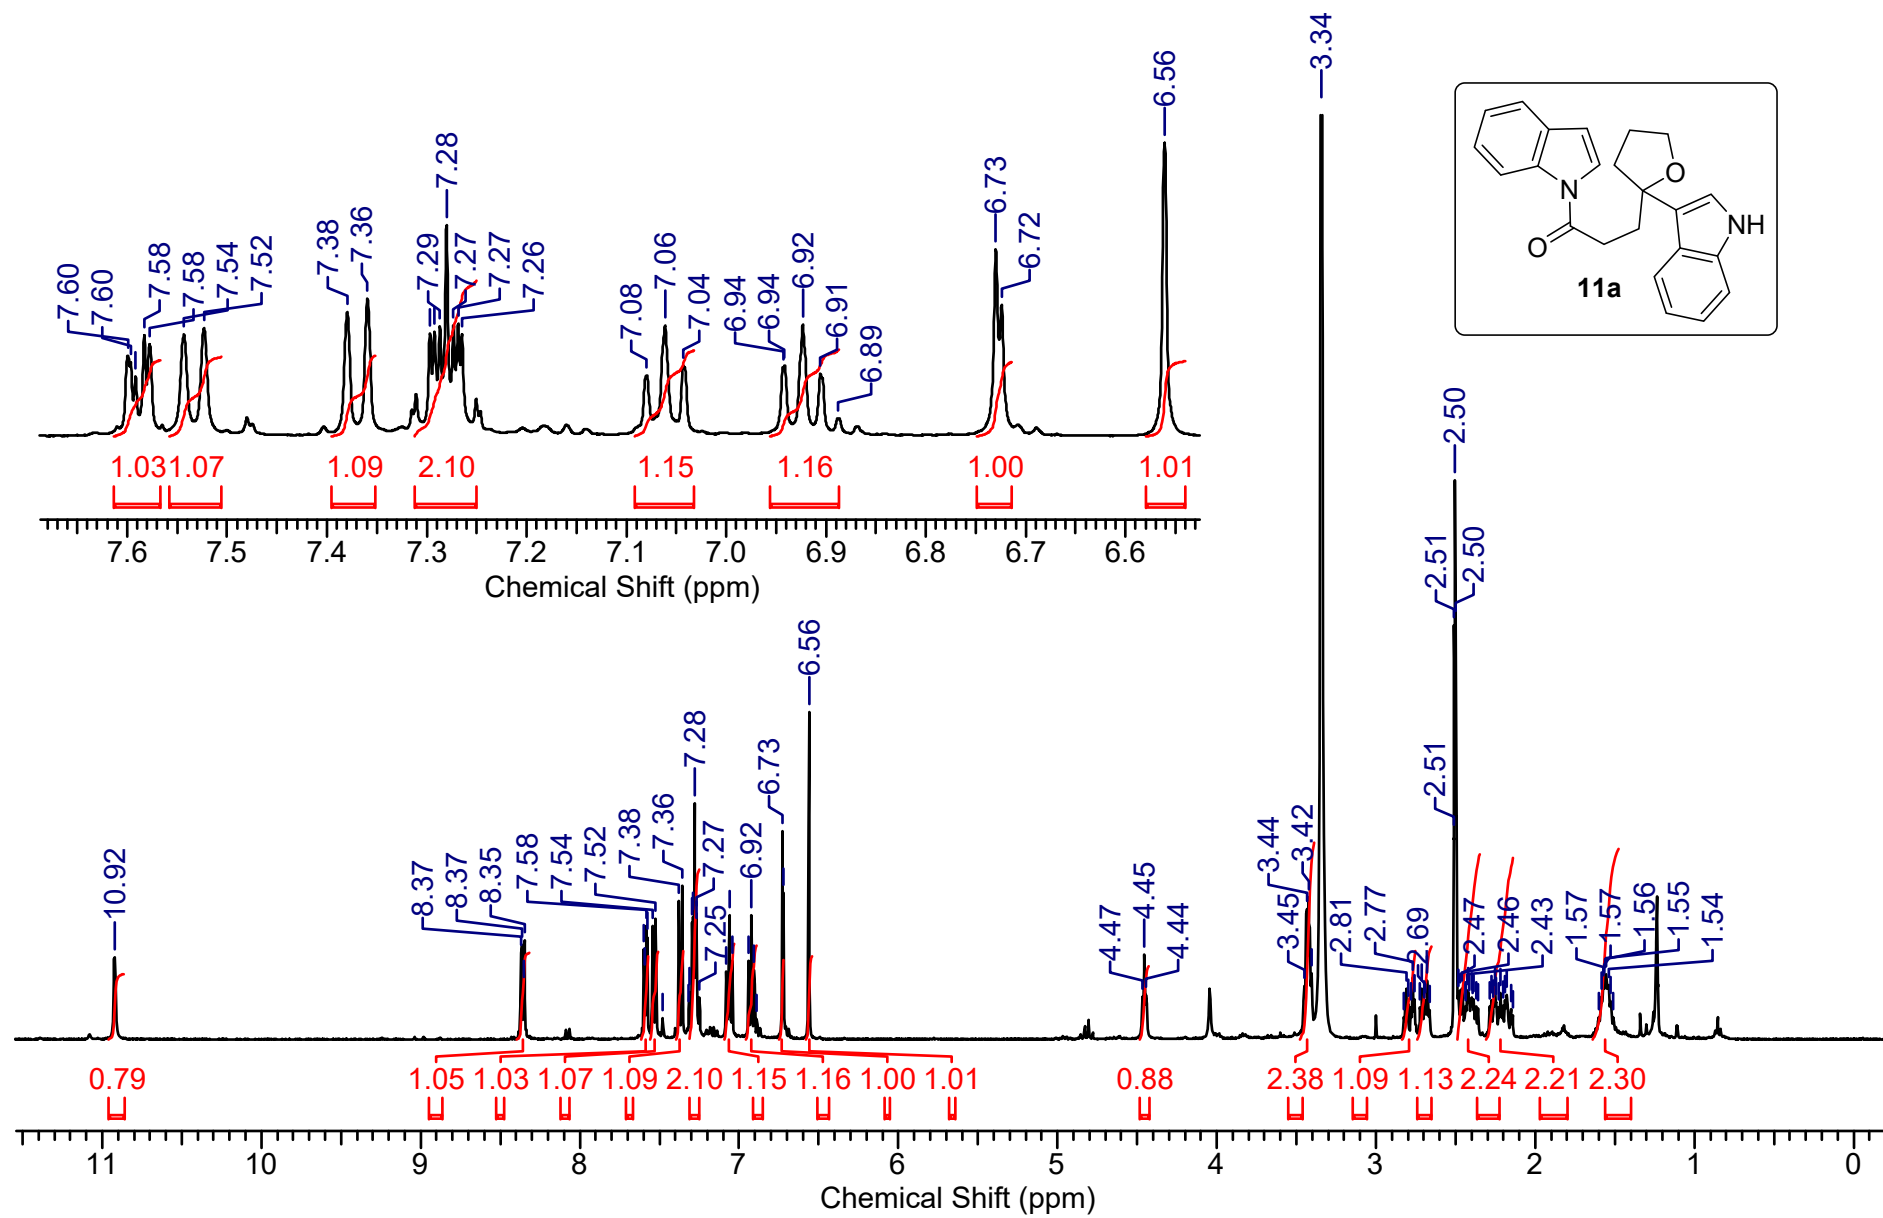

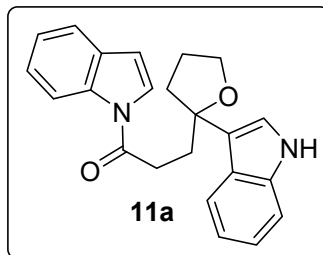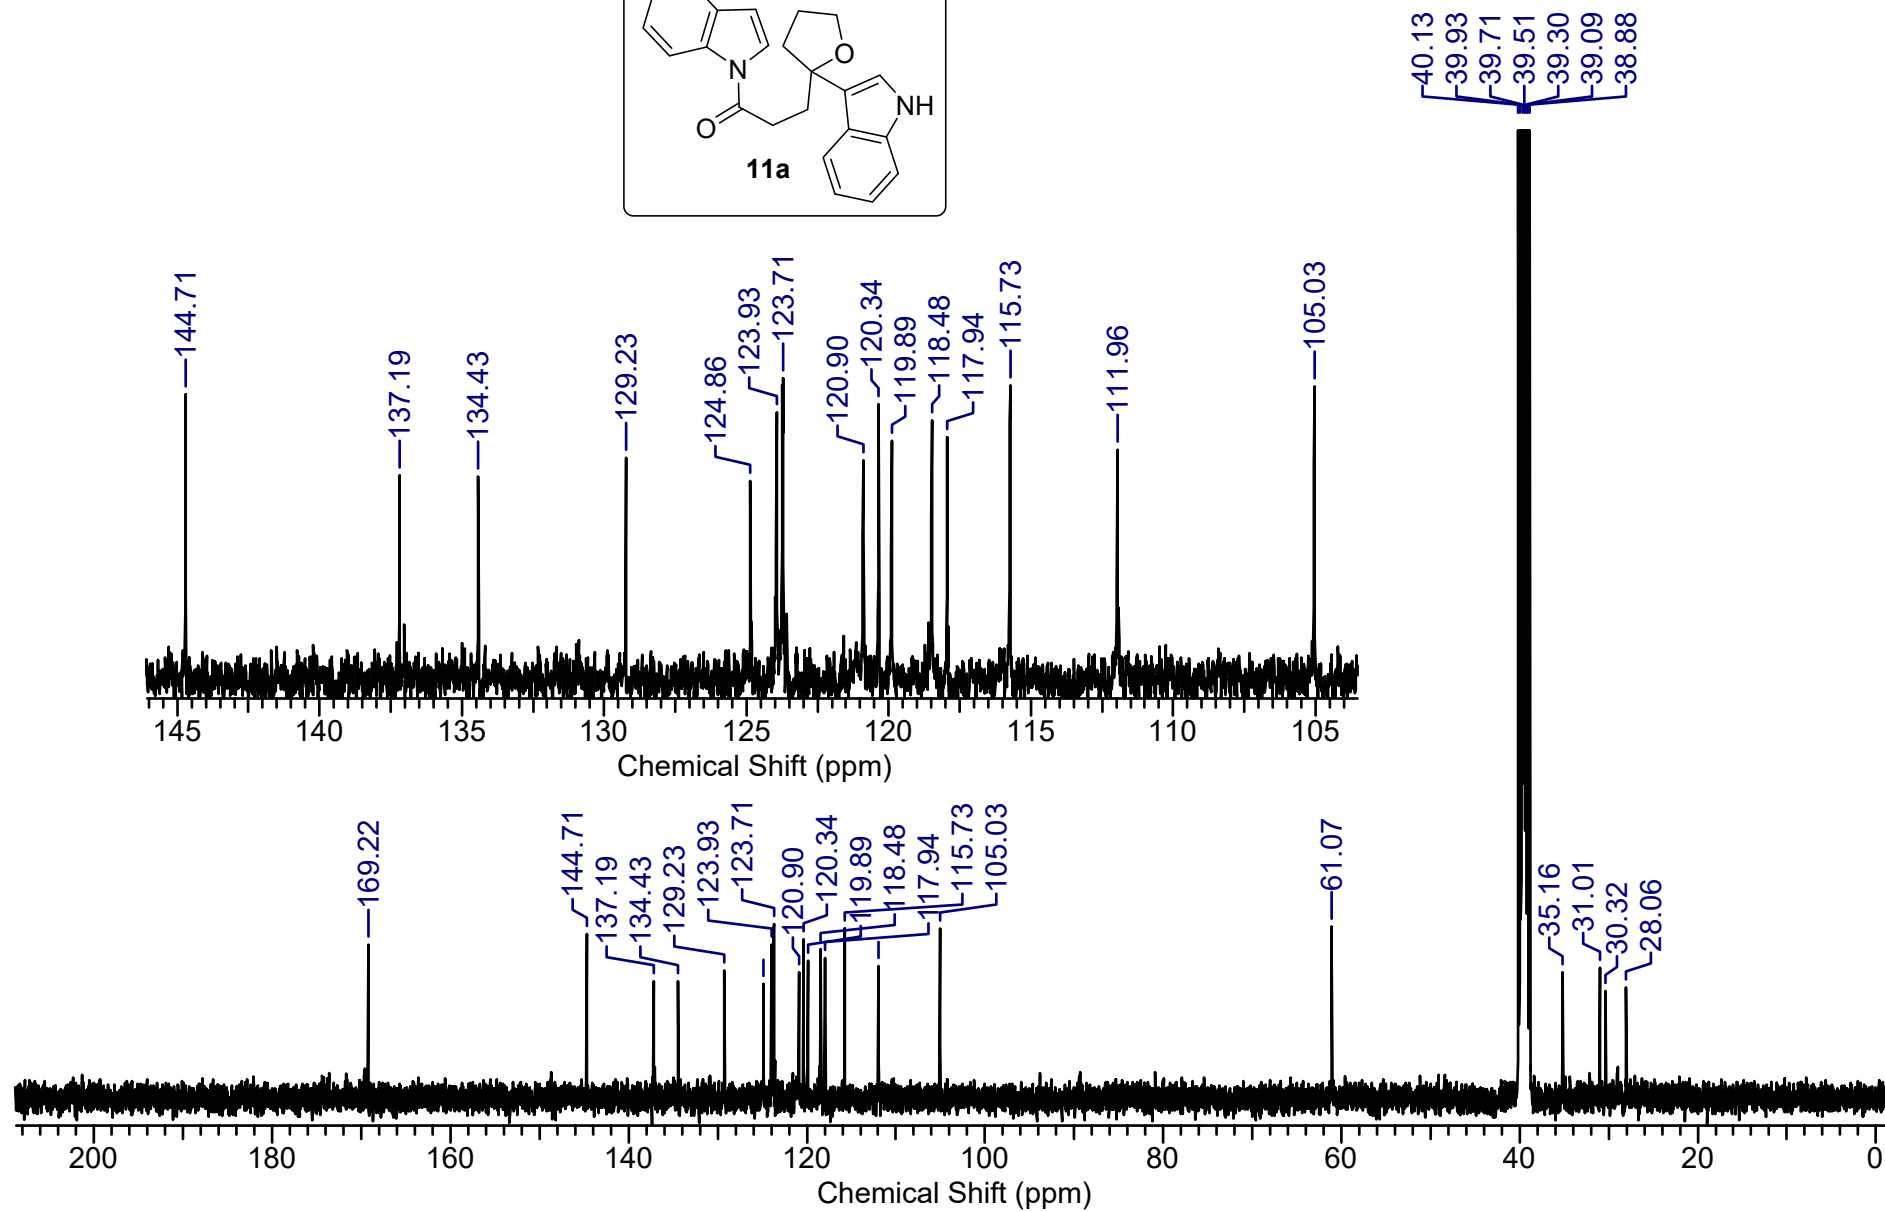

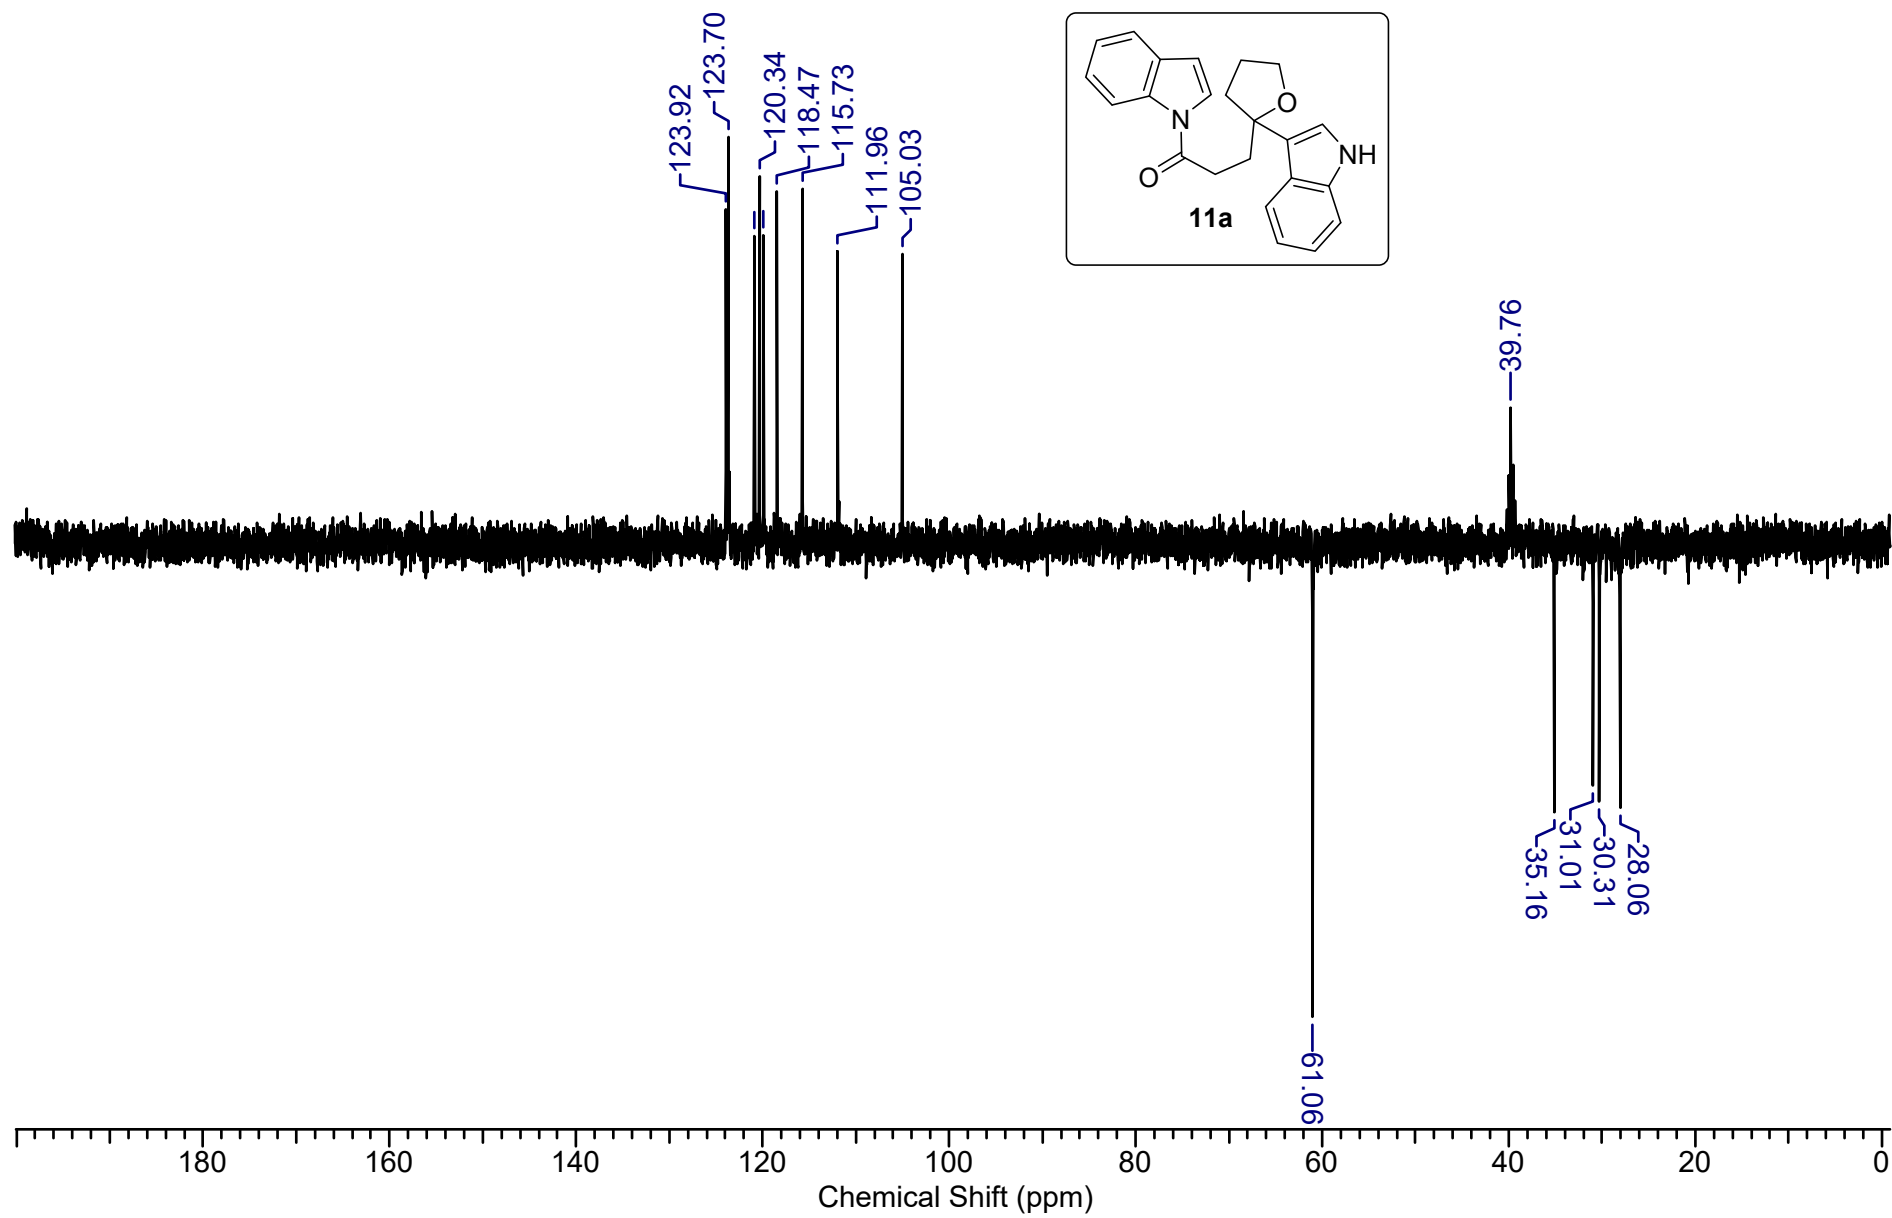



MS-15 #320 RT: 1.71 AV: 1 NL: 3.19E6  
T: FTMS + p ESI Full ms [100.0000-1500.0000]

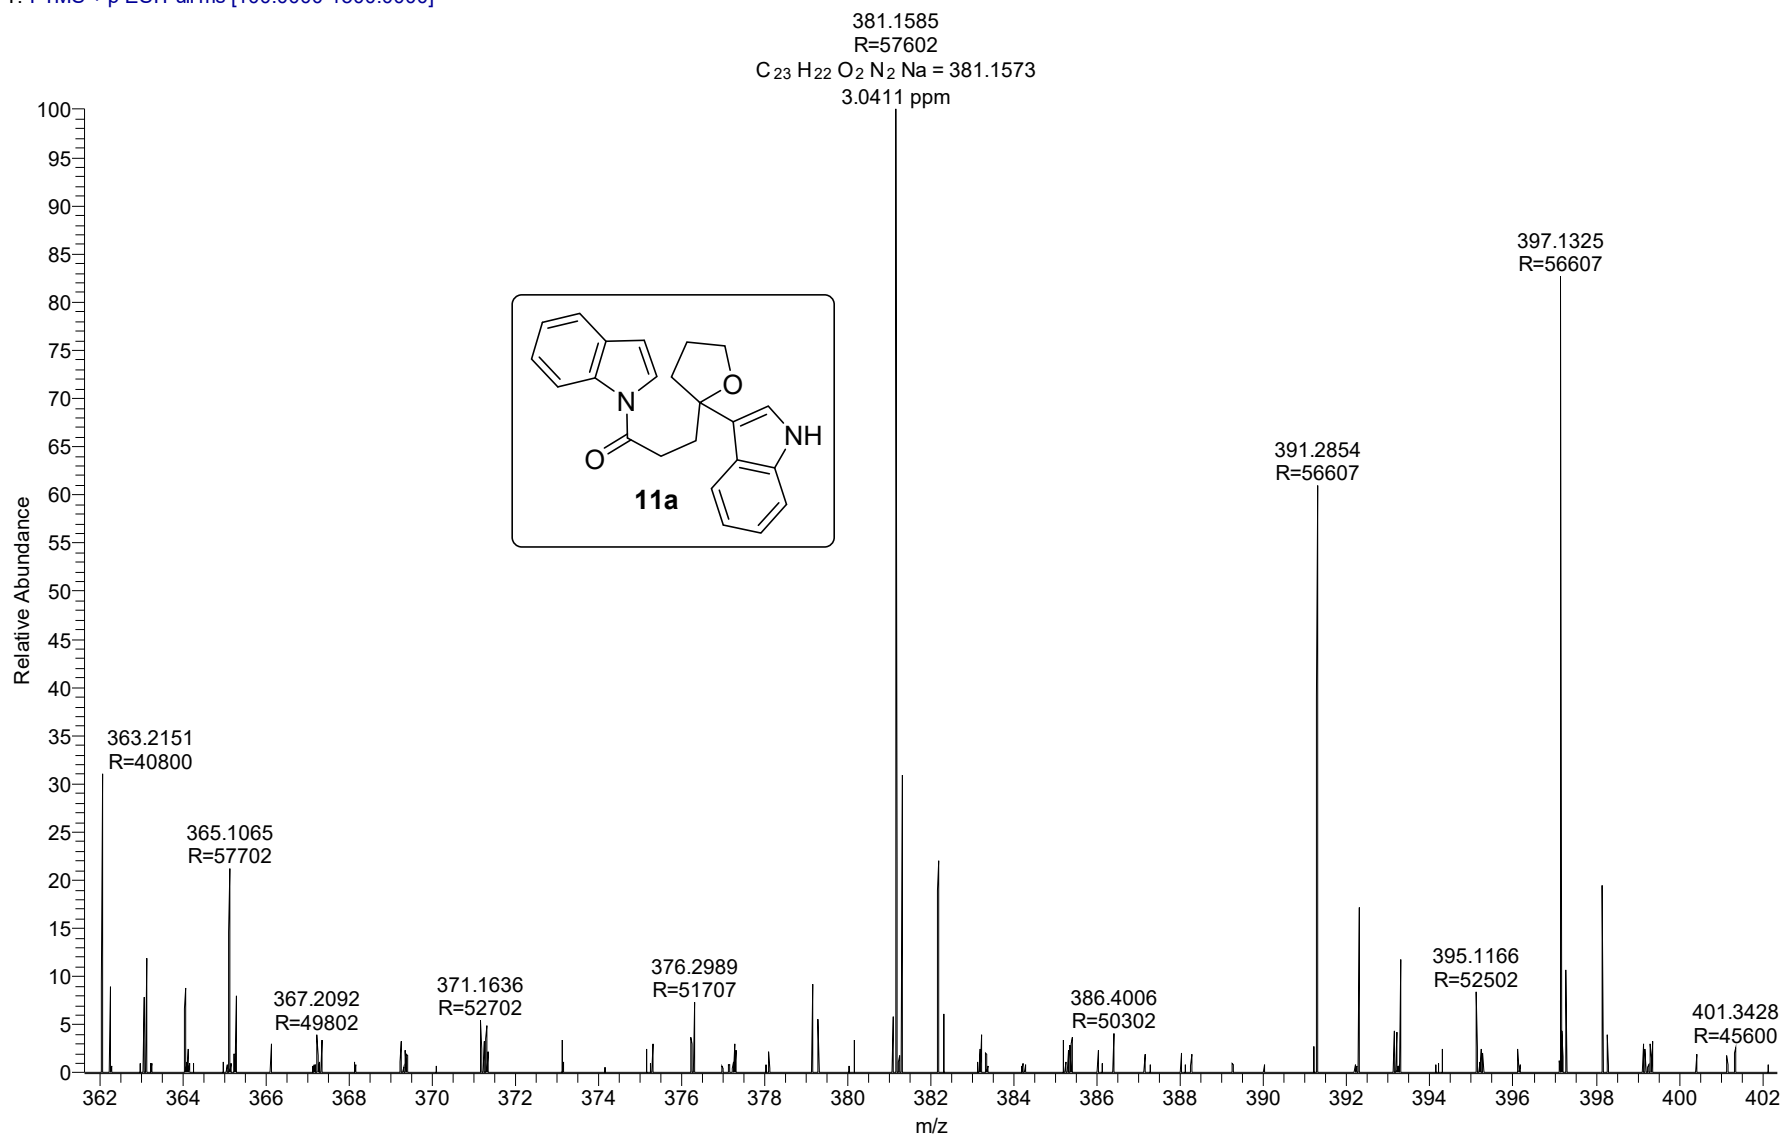

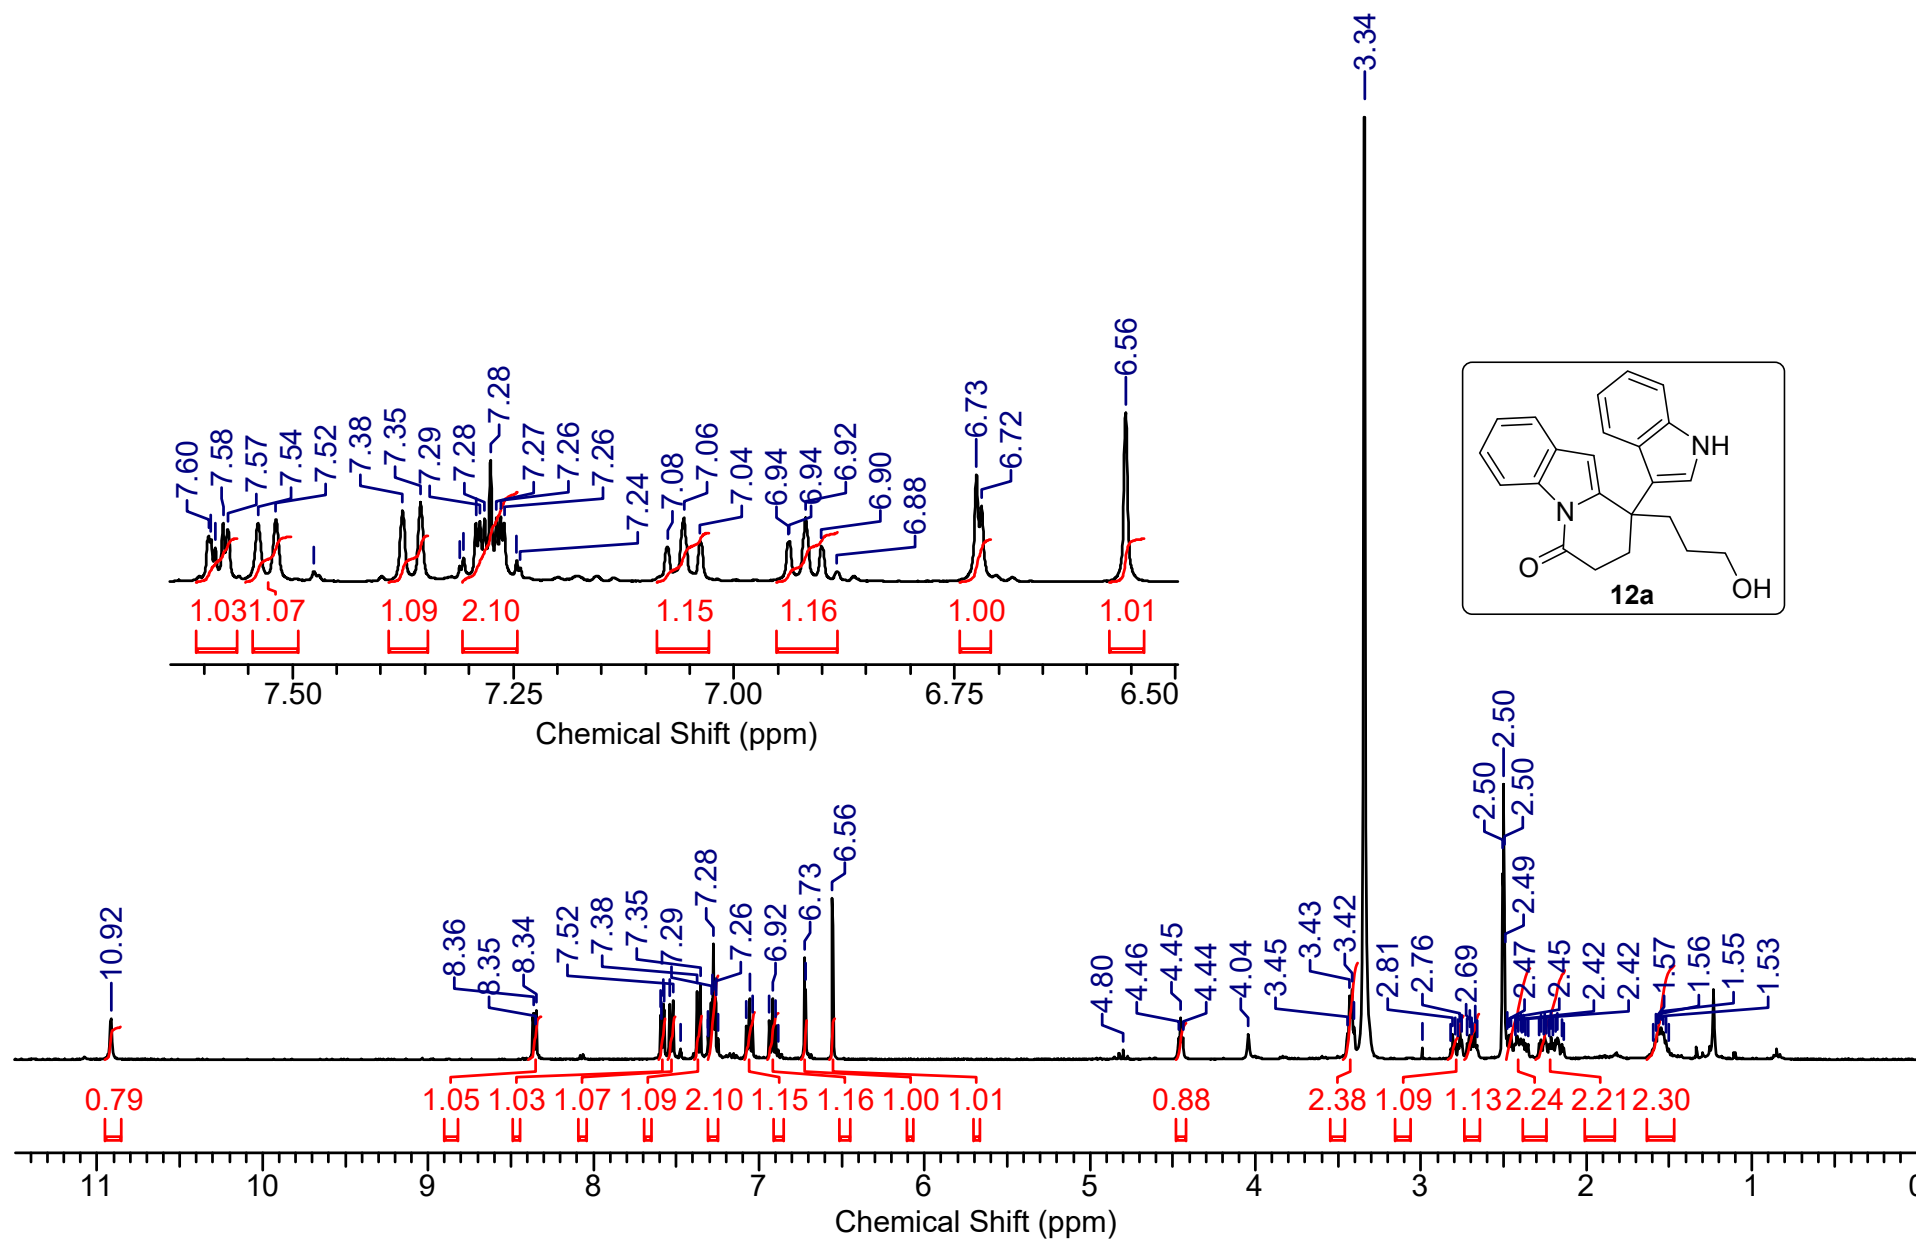

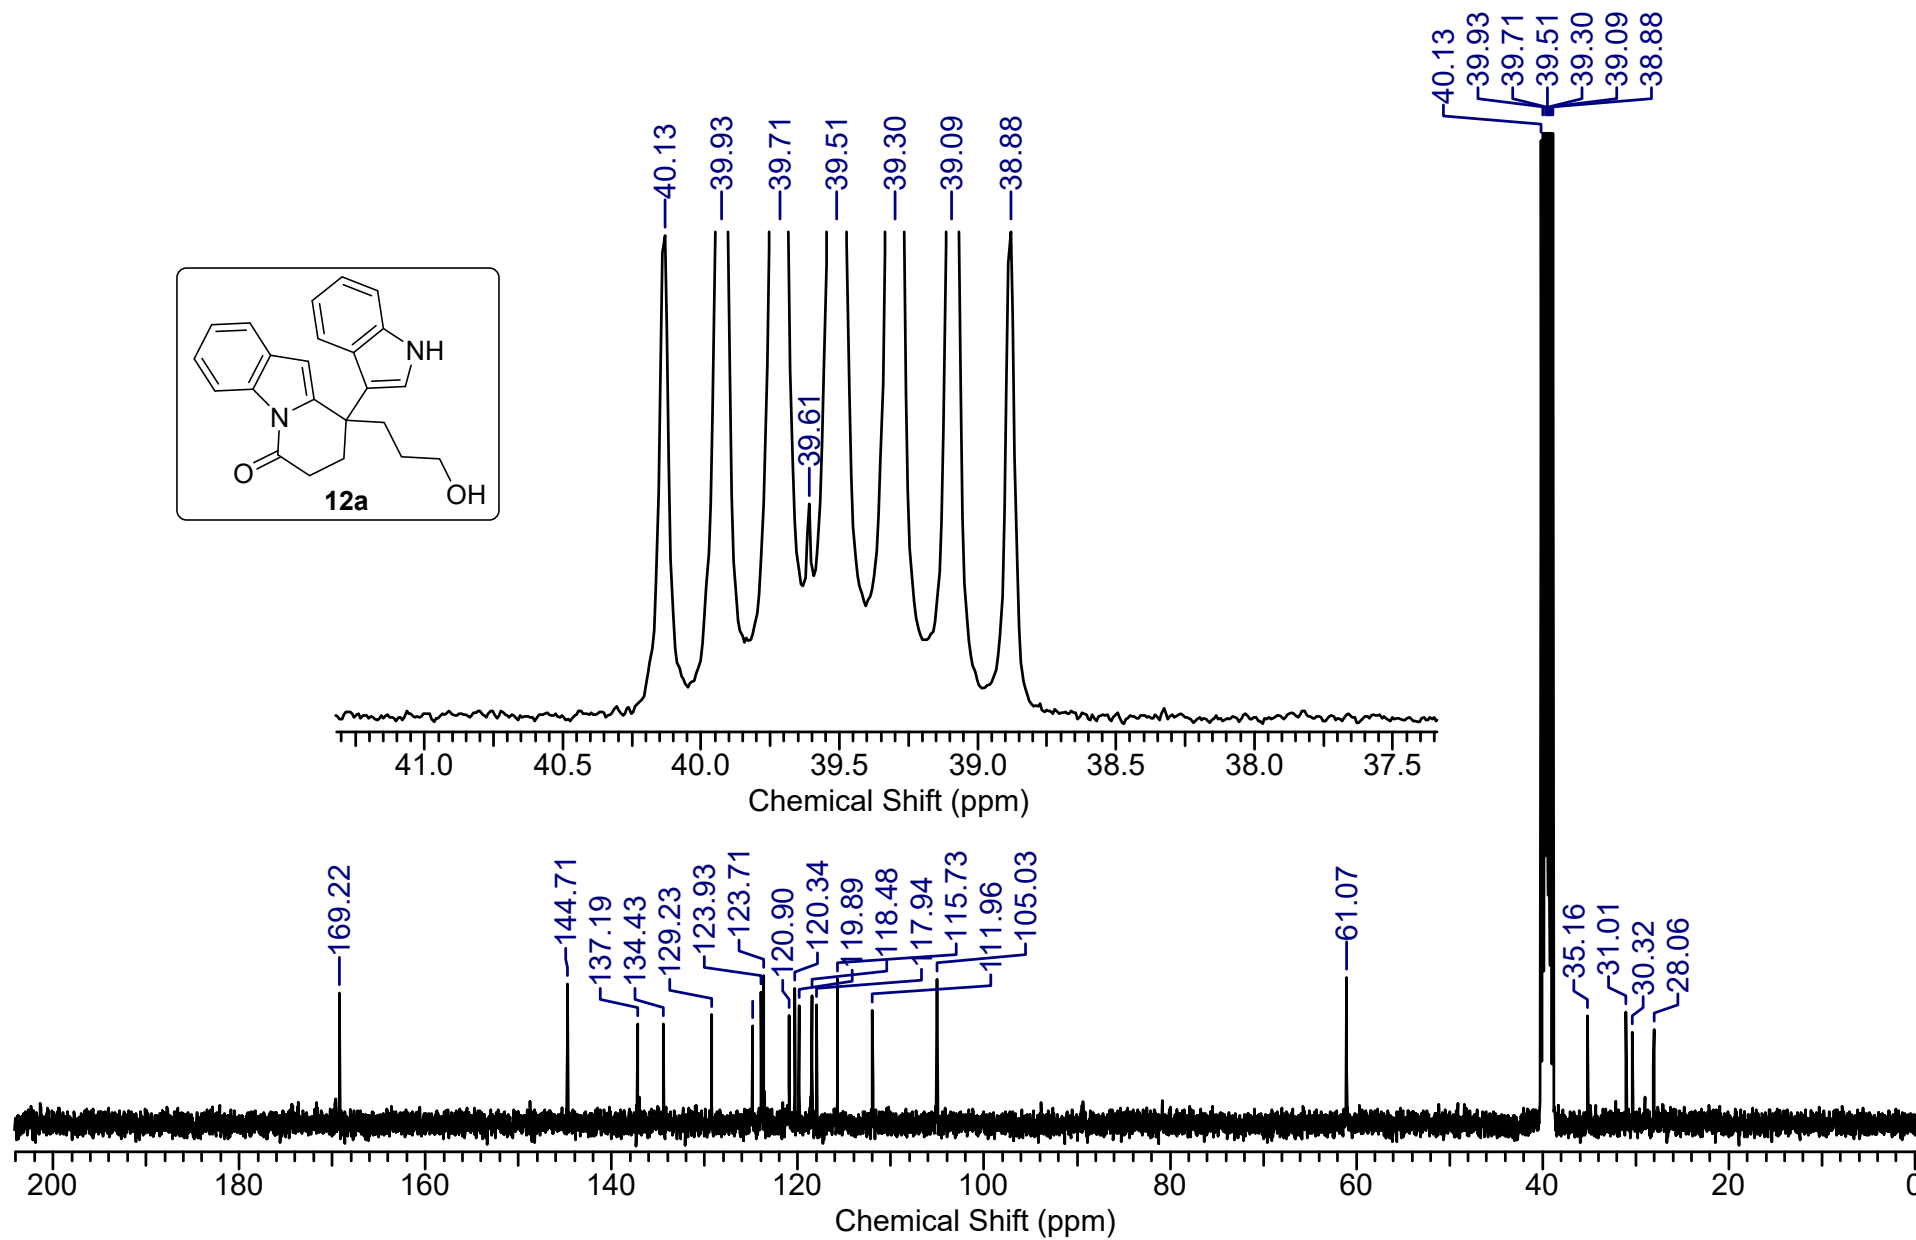

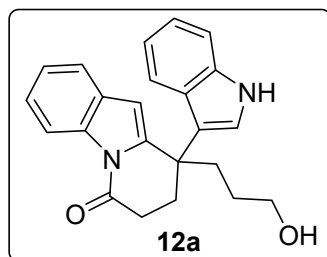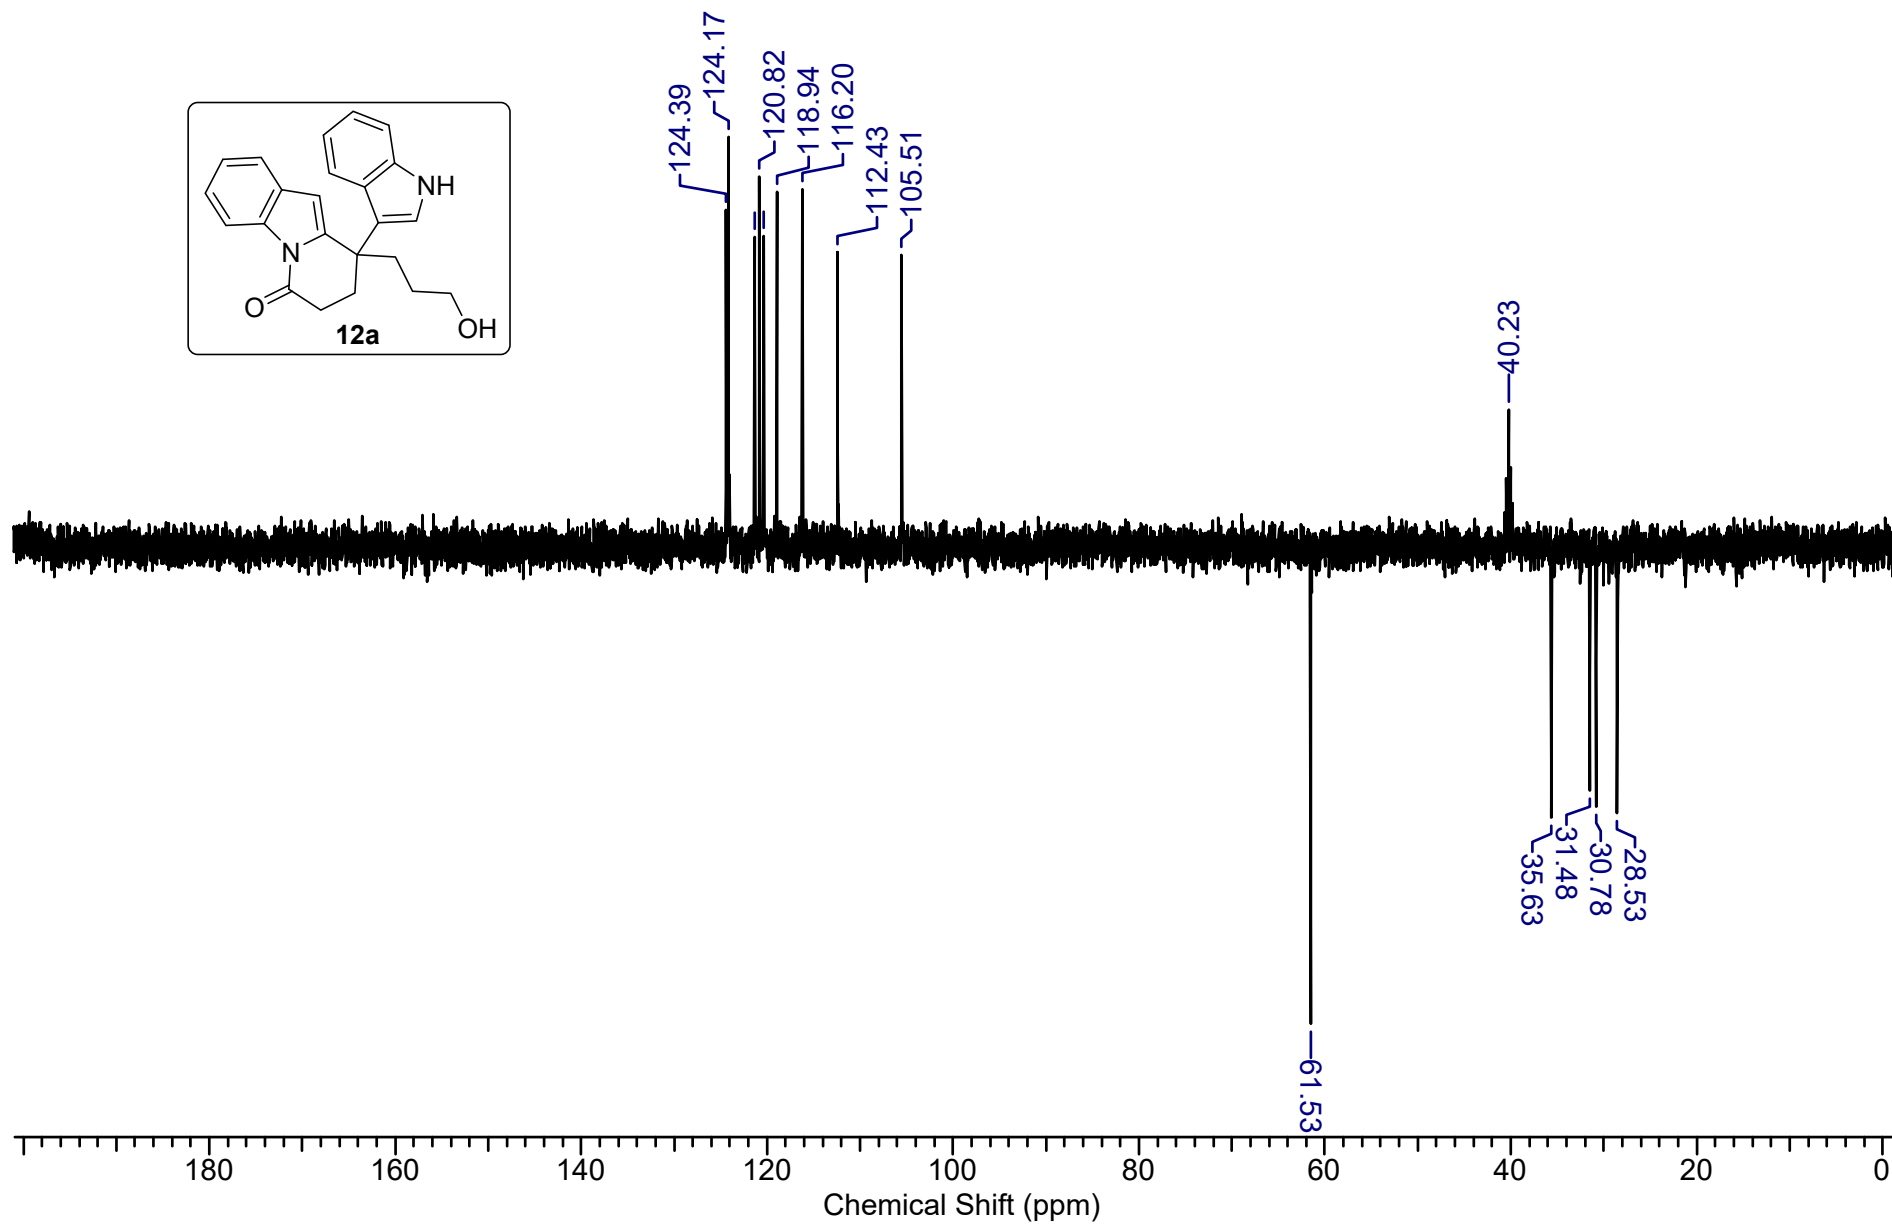

MS-15a #310 RT: 1.66 AV: 1 NL: 2.58E6  
T: FTMS + p ESI Full ms [100.0000-1500.0000]

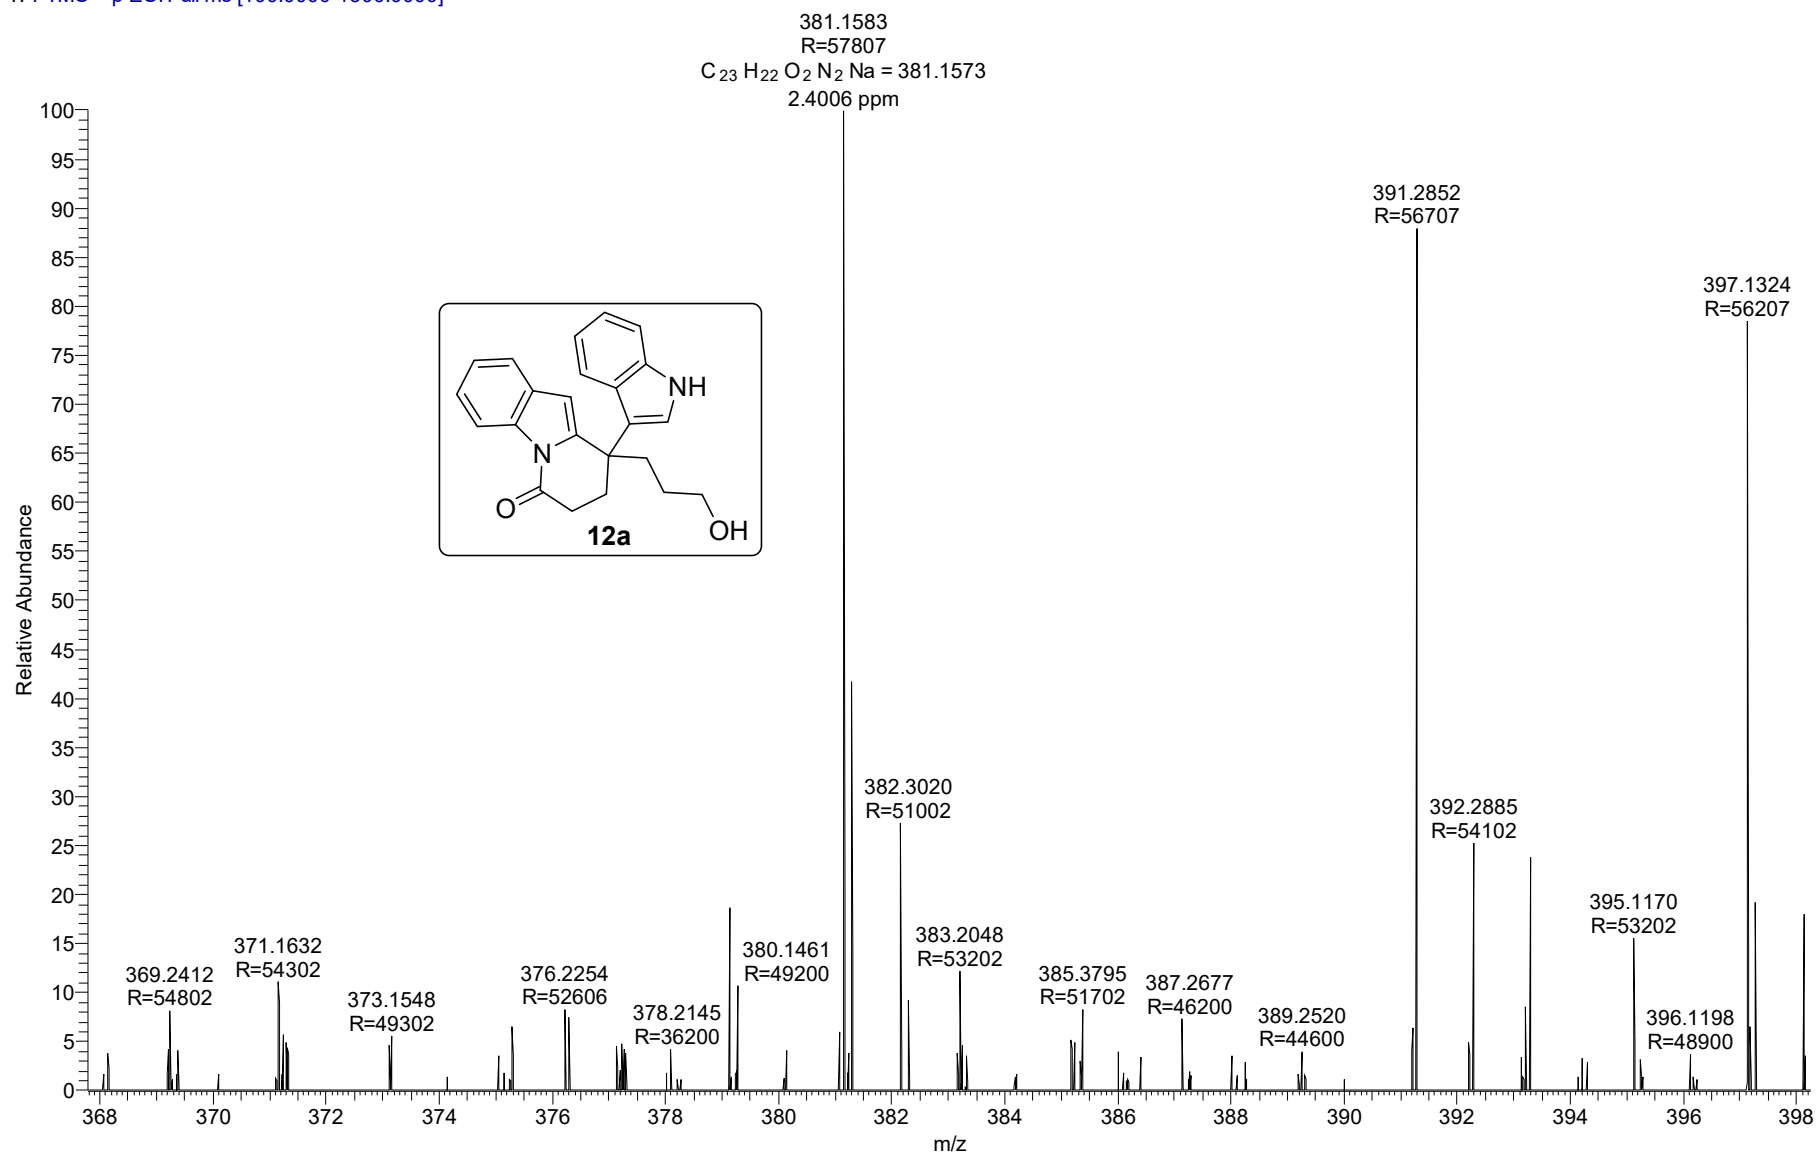

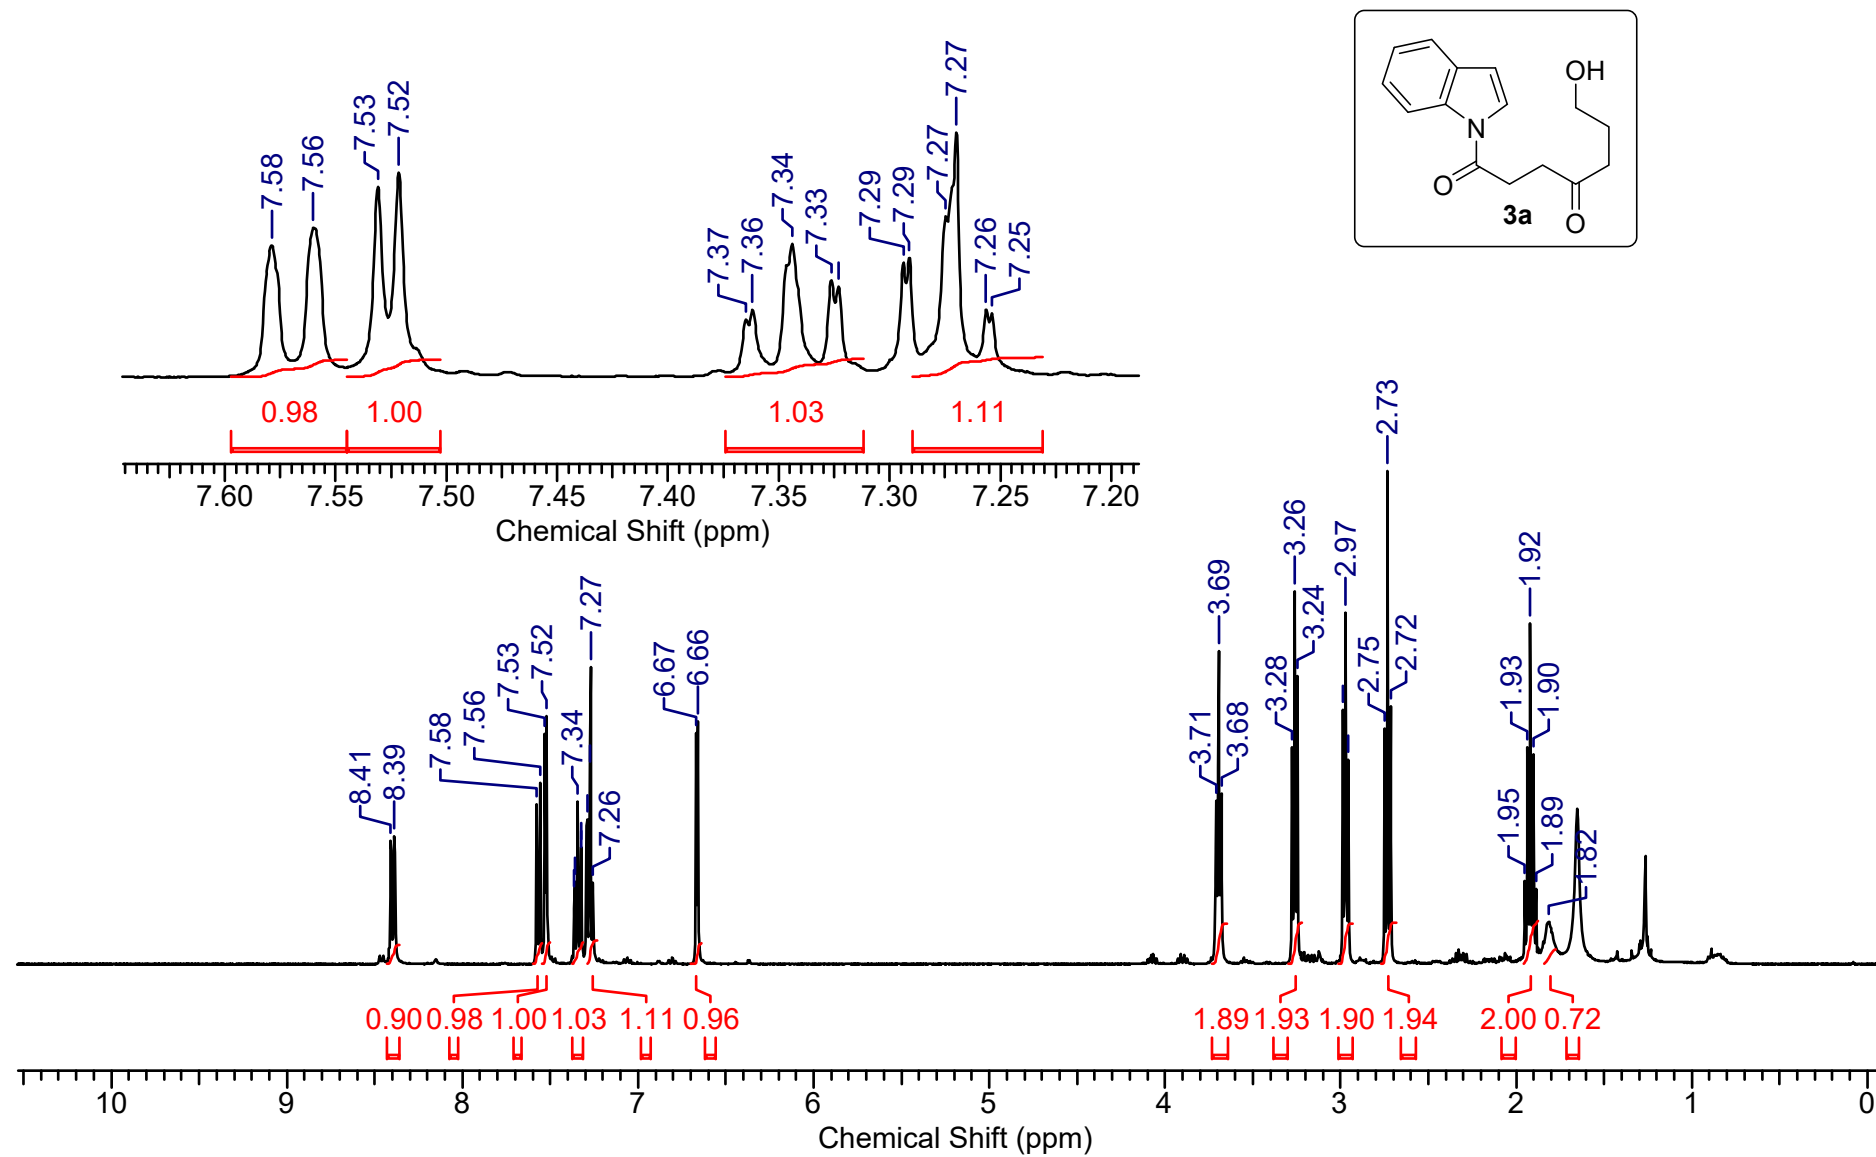

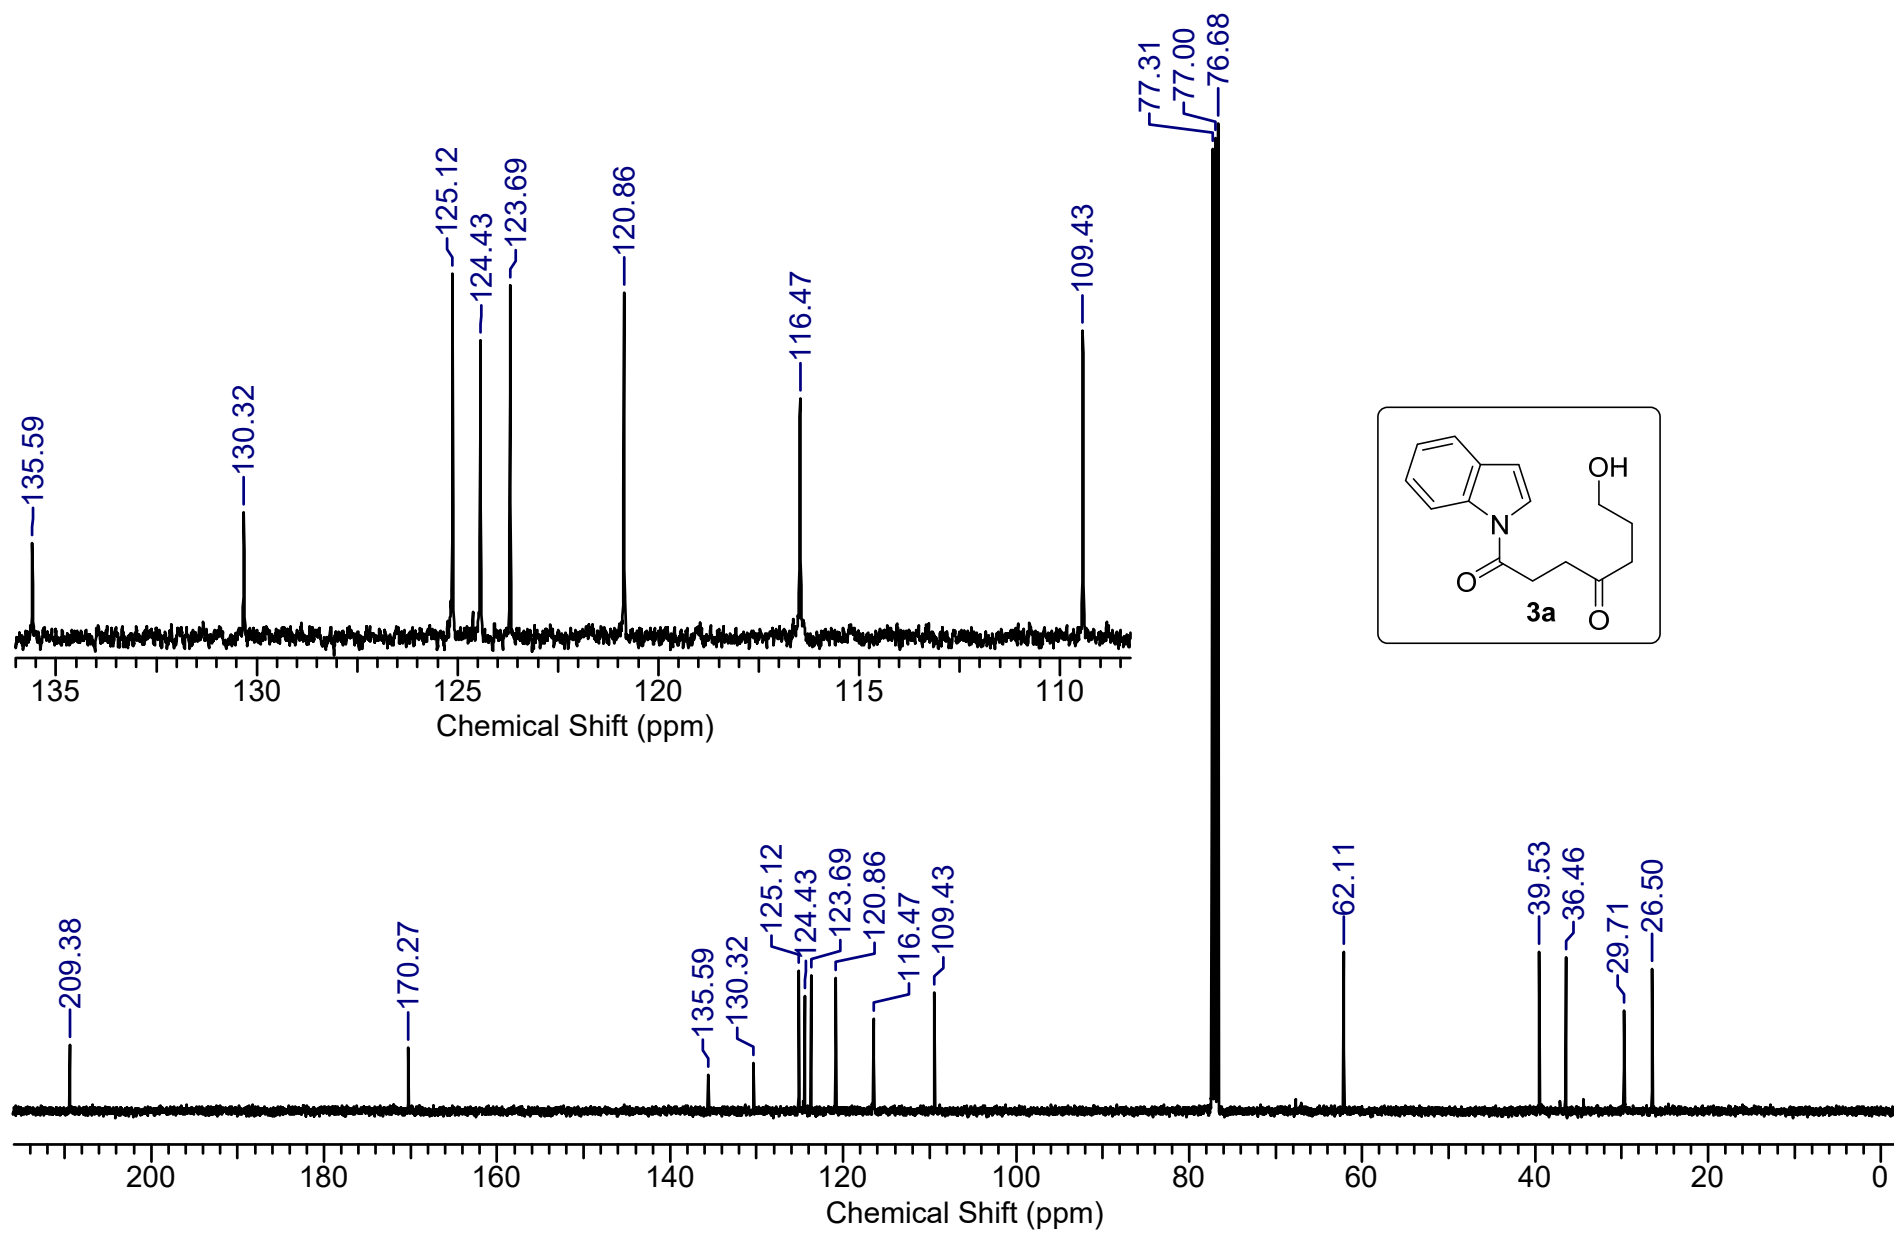

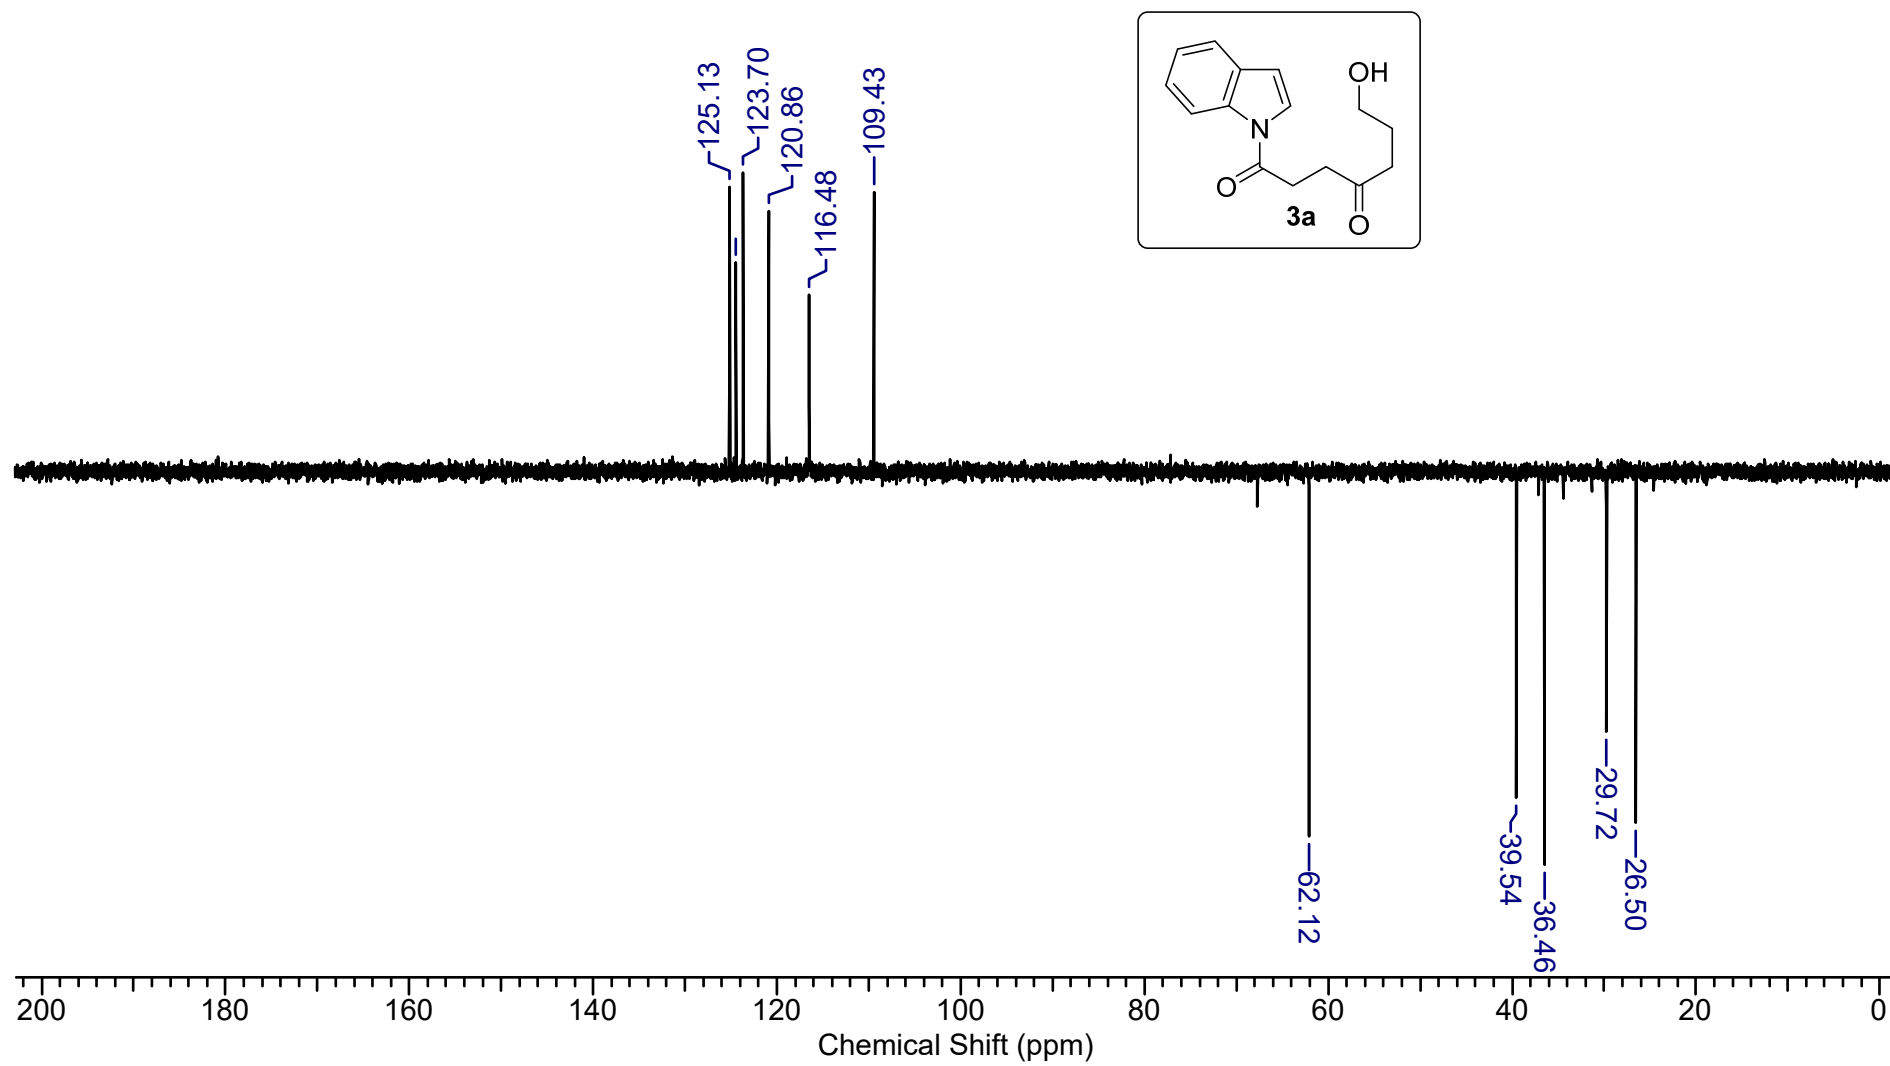



MS-17 #267 RT: 1.43 AV: 1 NL: 7.22E8  
T: FTMS + p ESI Full ms [100.0000-1500.0000]

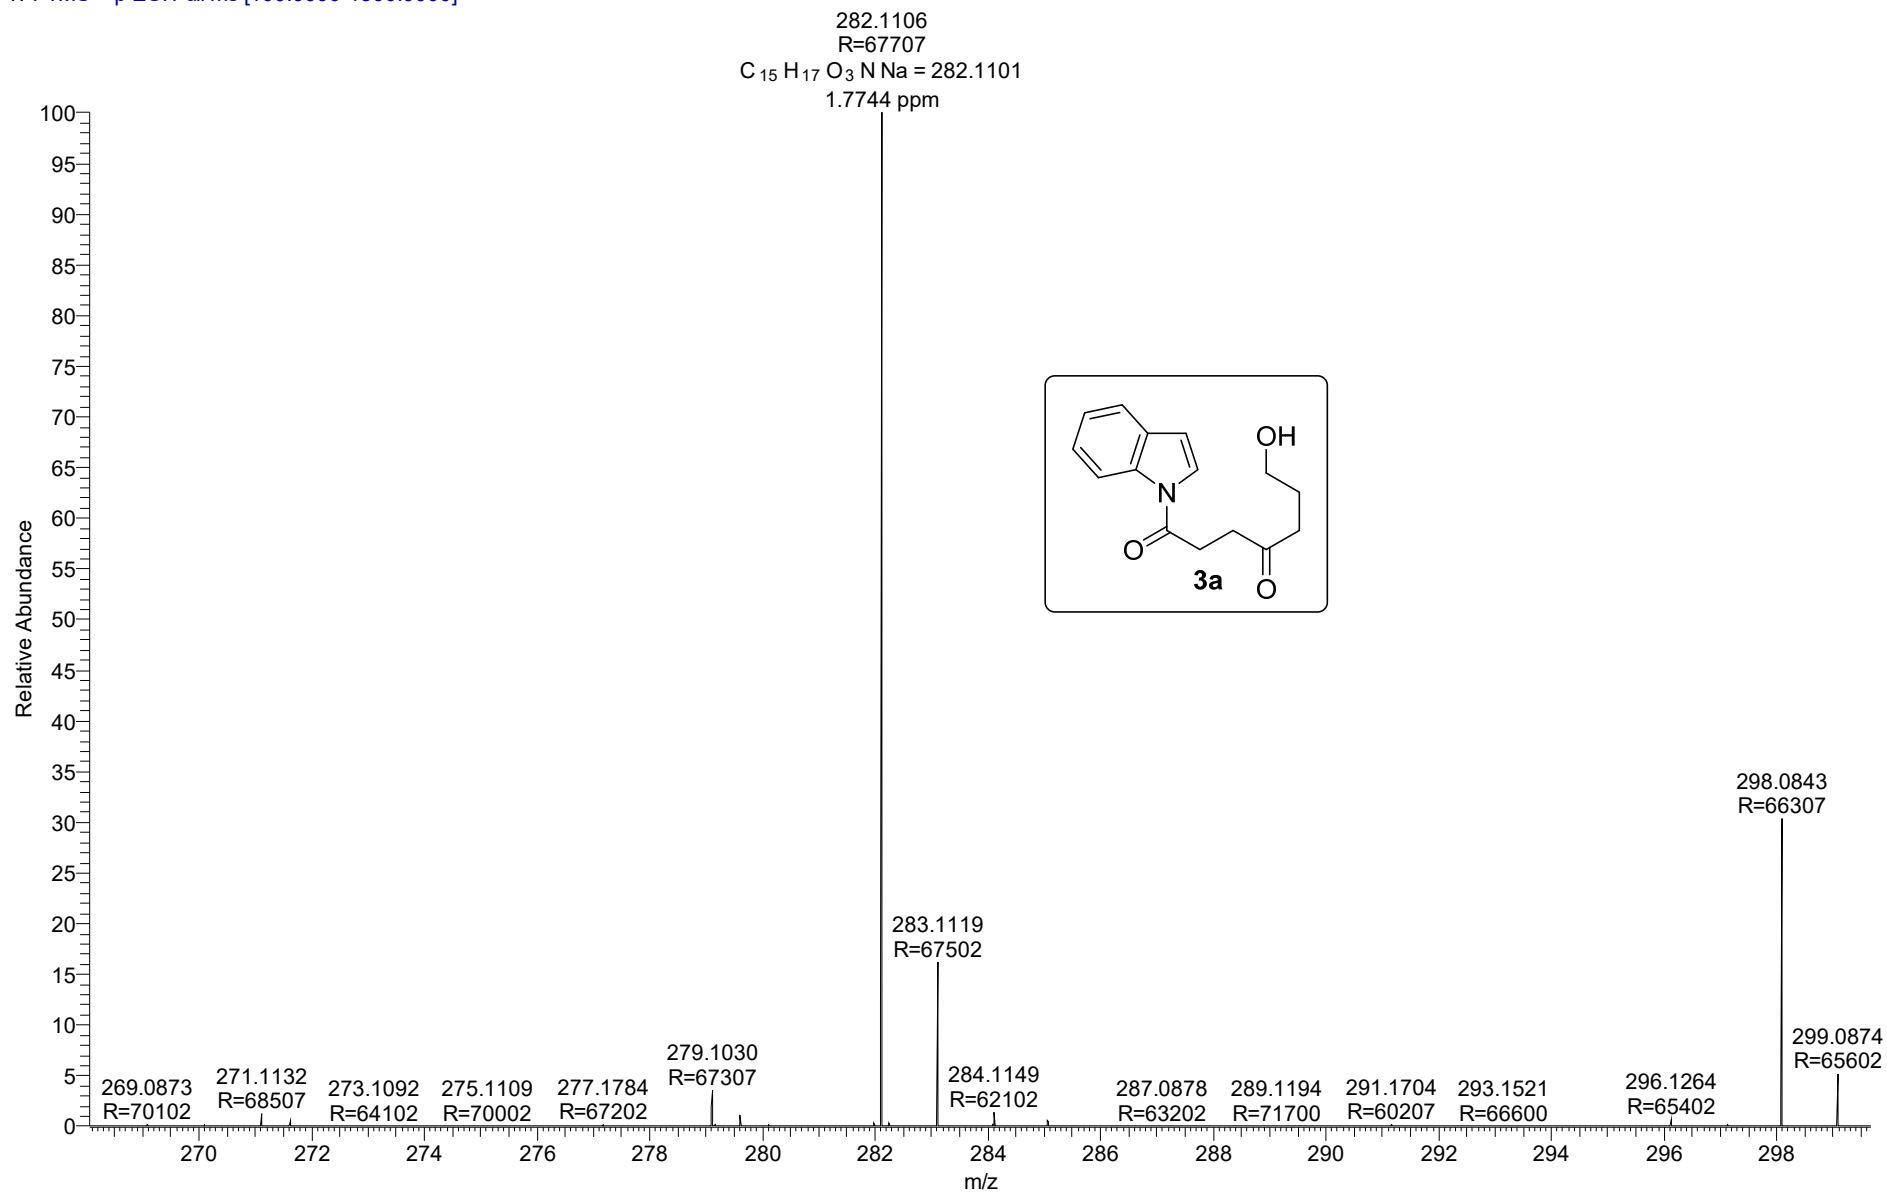

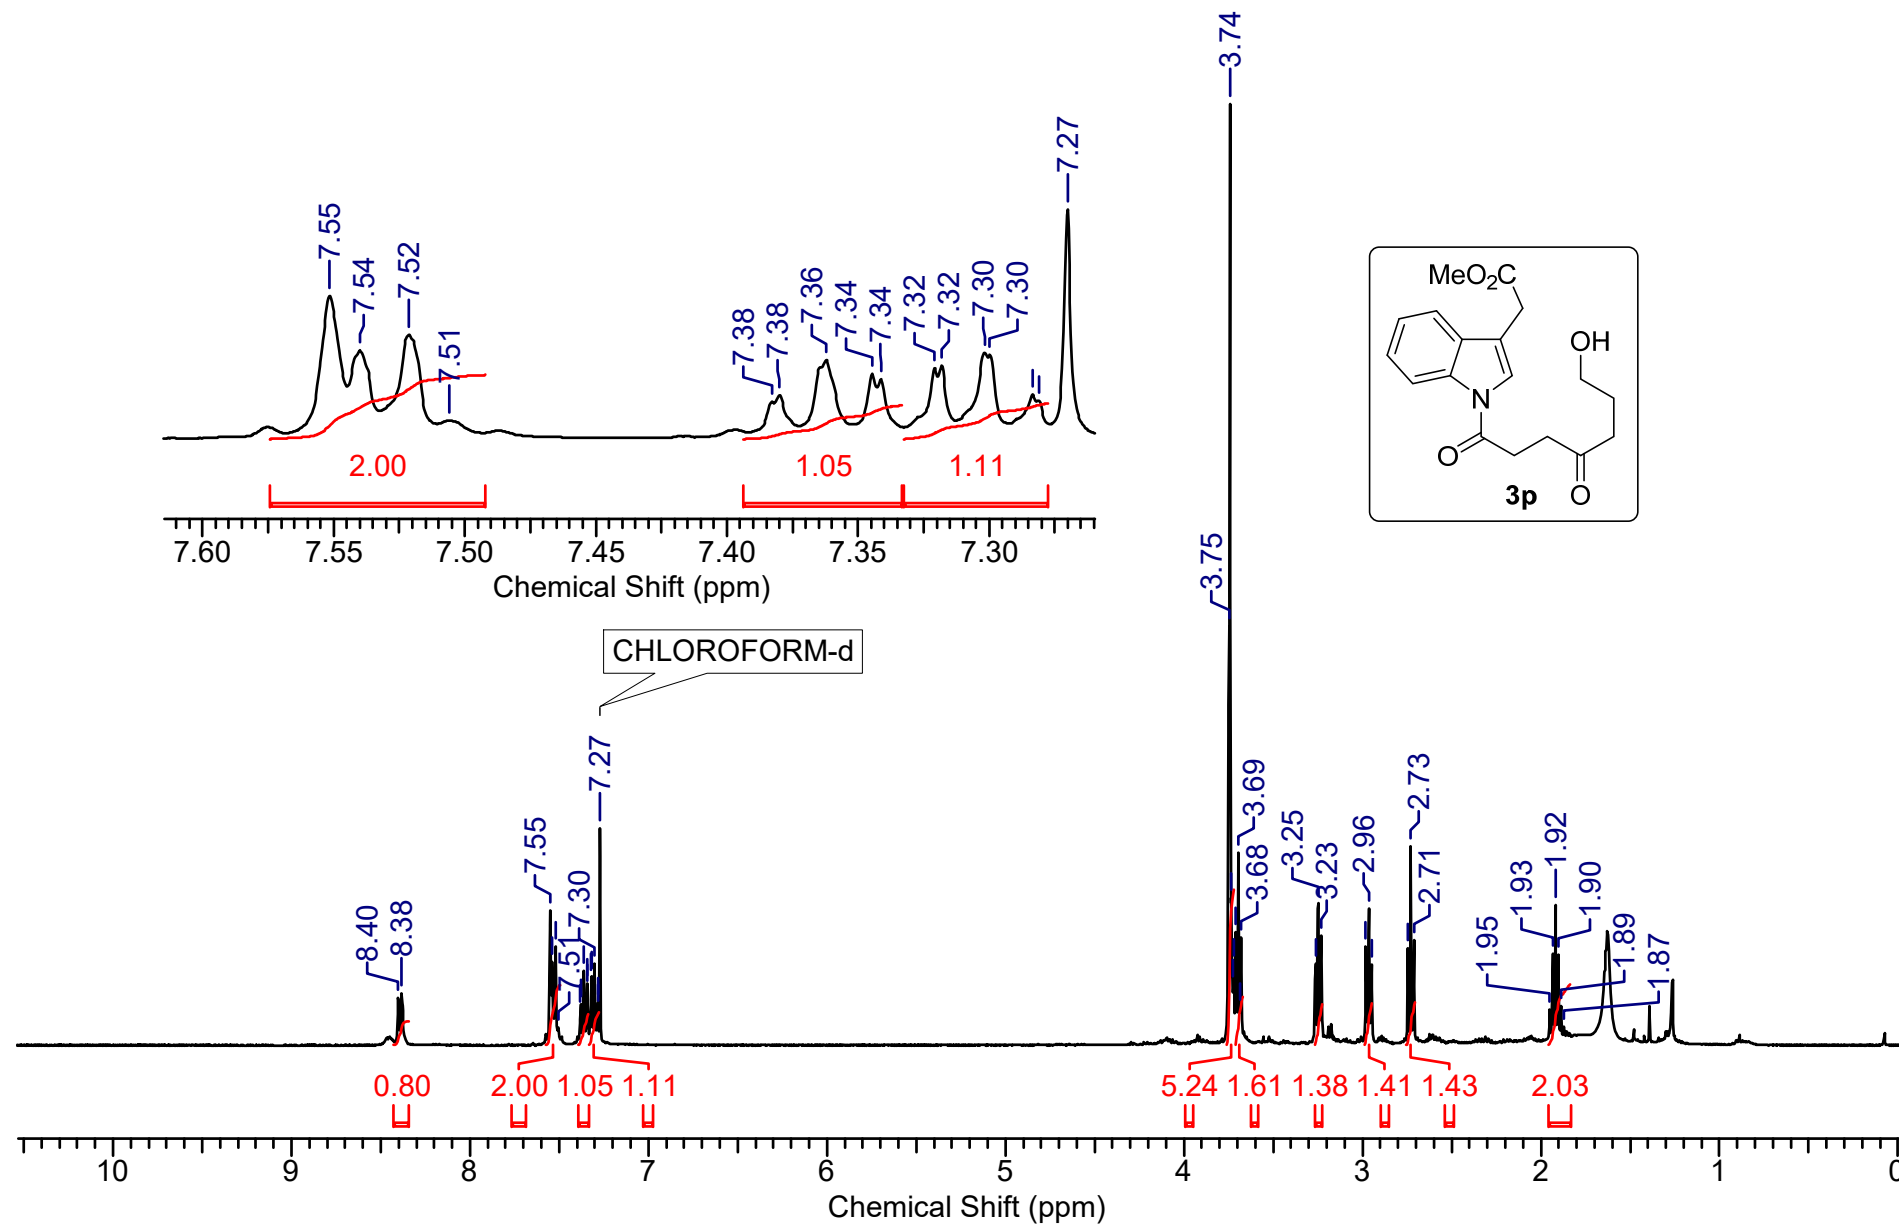

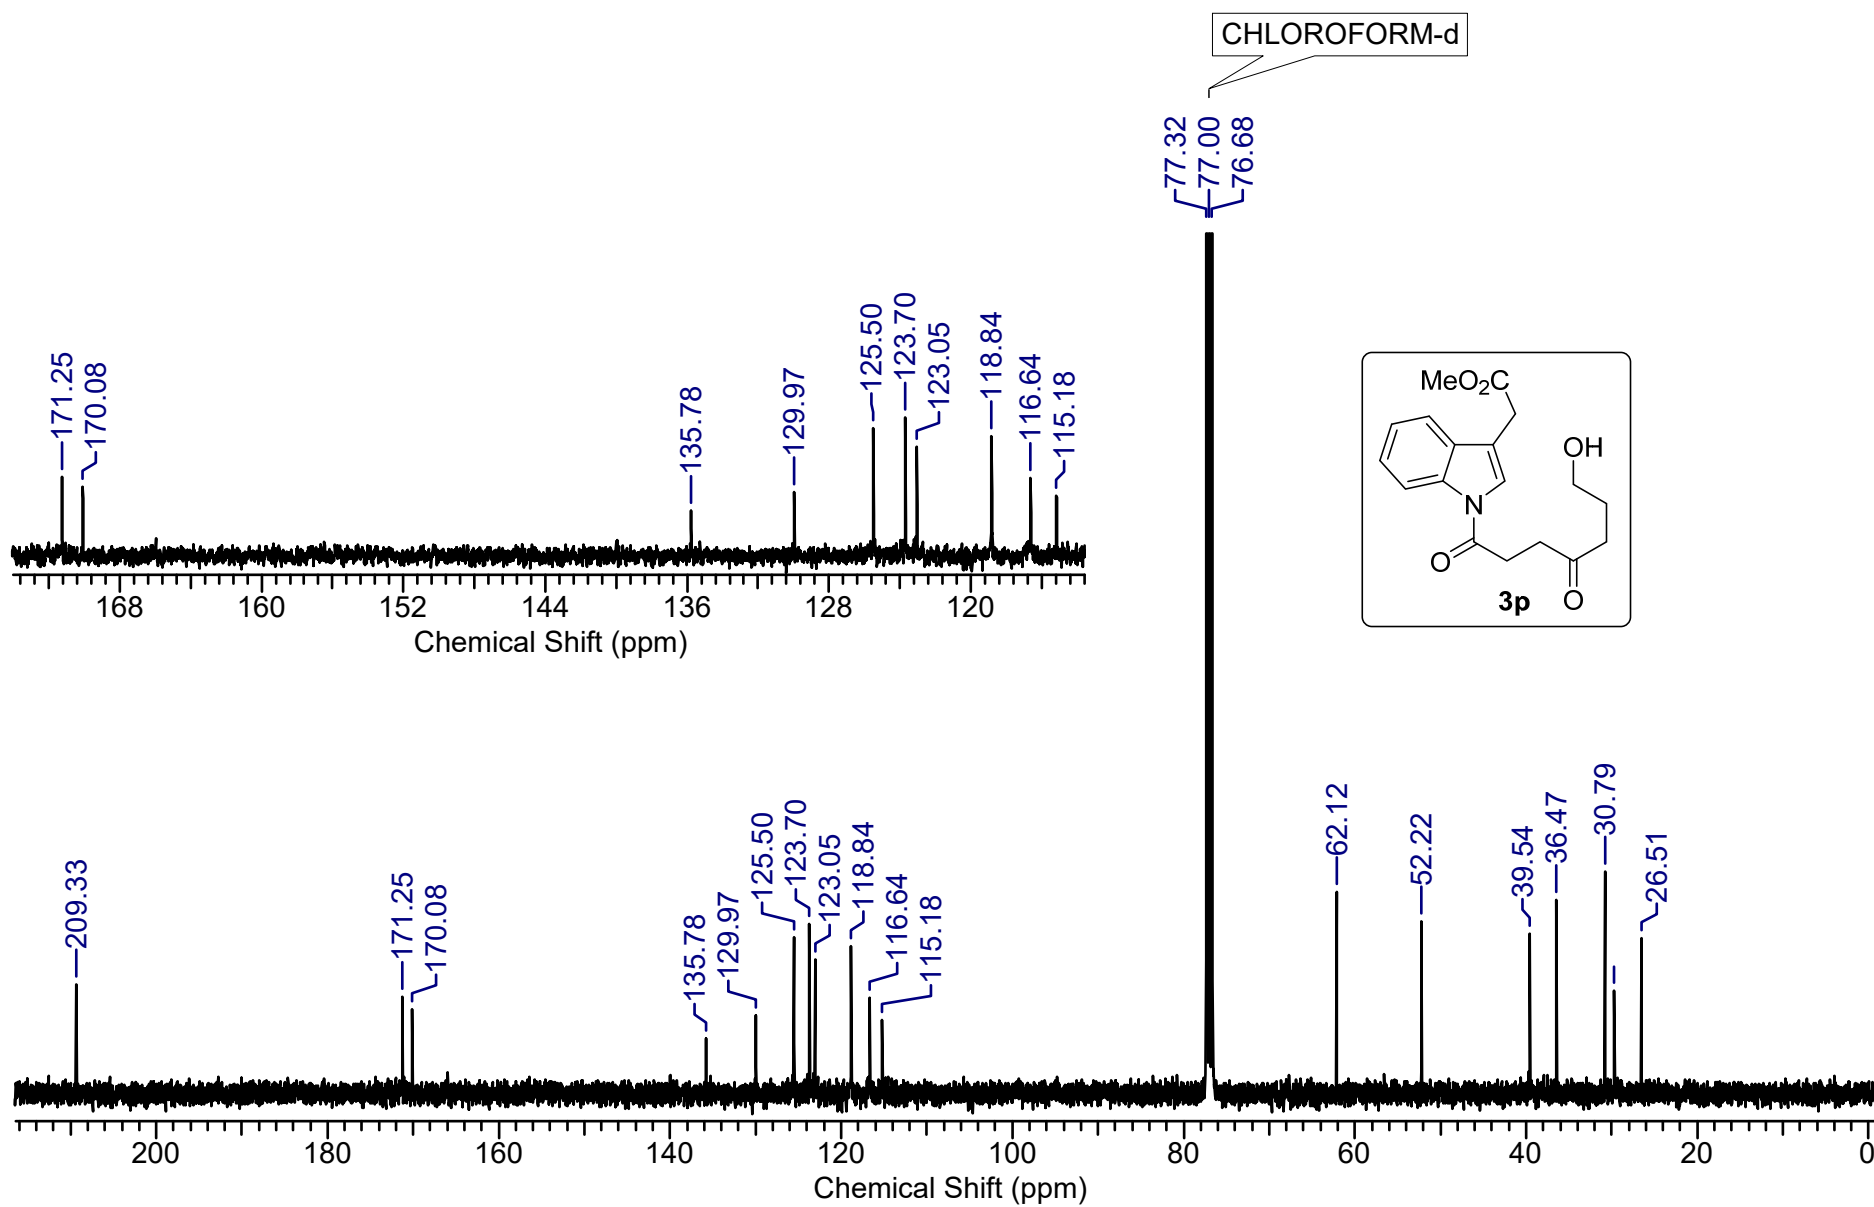

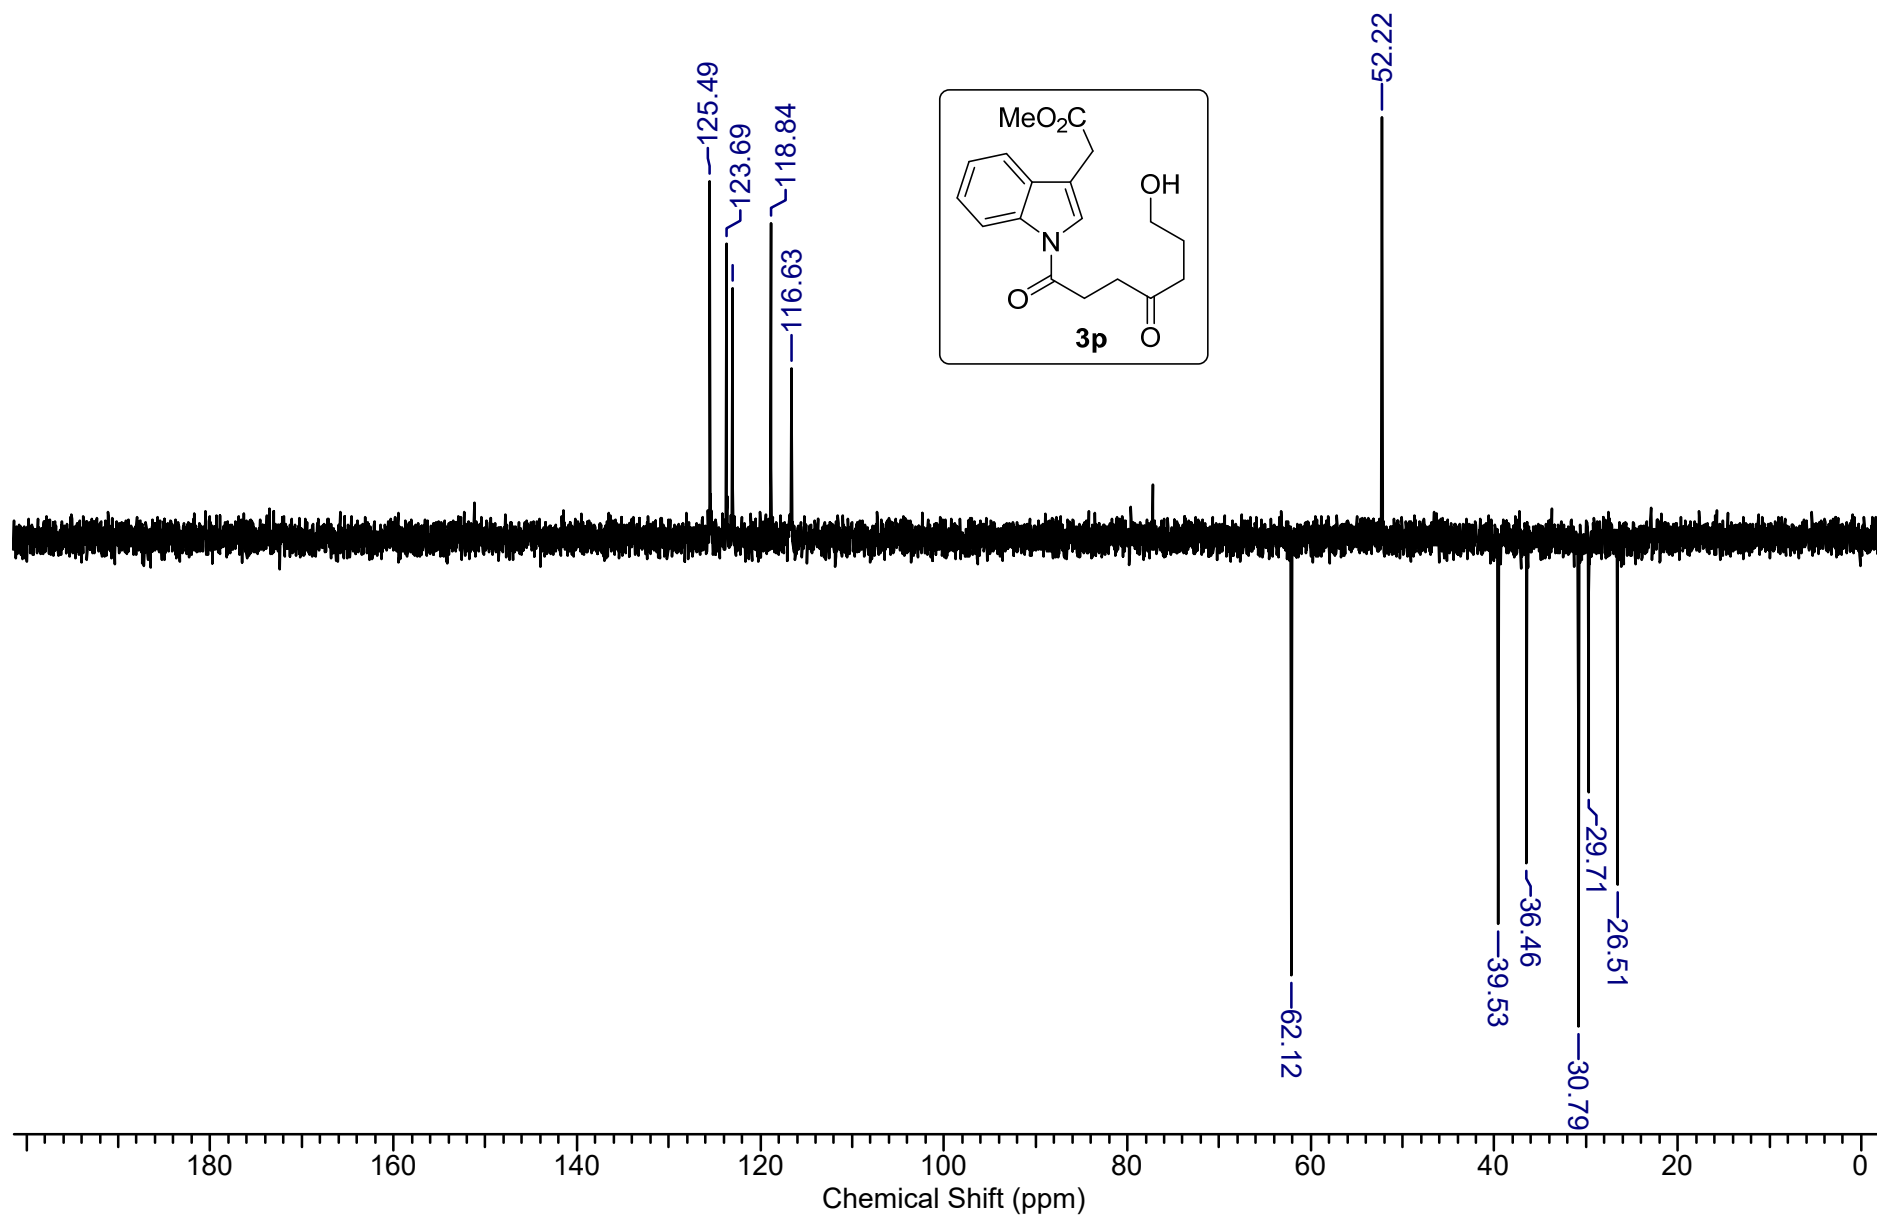

MSH-102 #334 RT: 1.81 AV: 1 NL: 1.12E8  
T: FTMS + p ESI Full ms [100.0000-1500.0000]

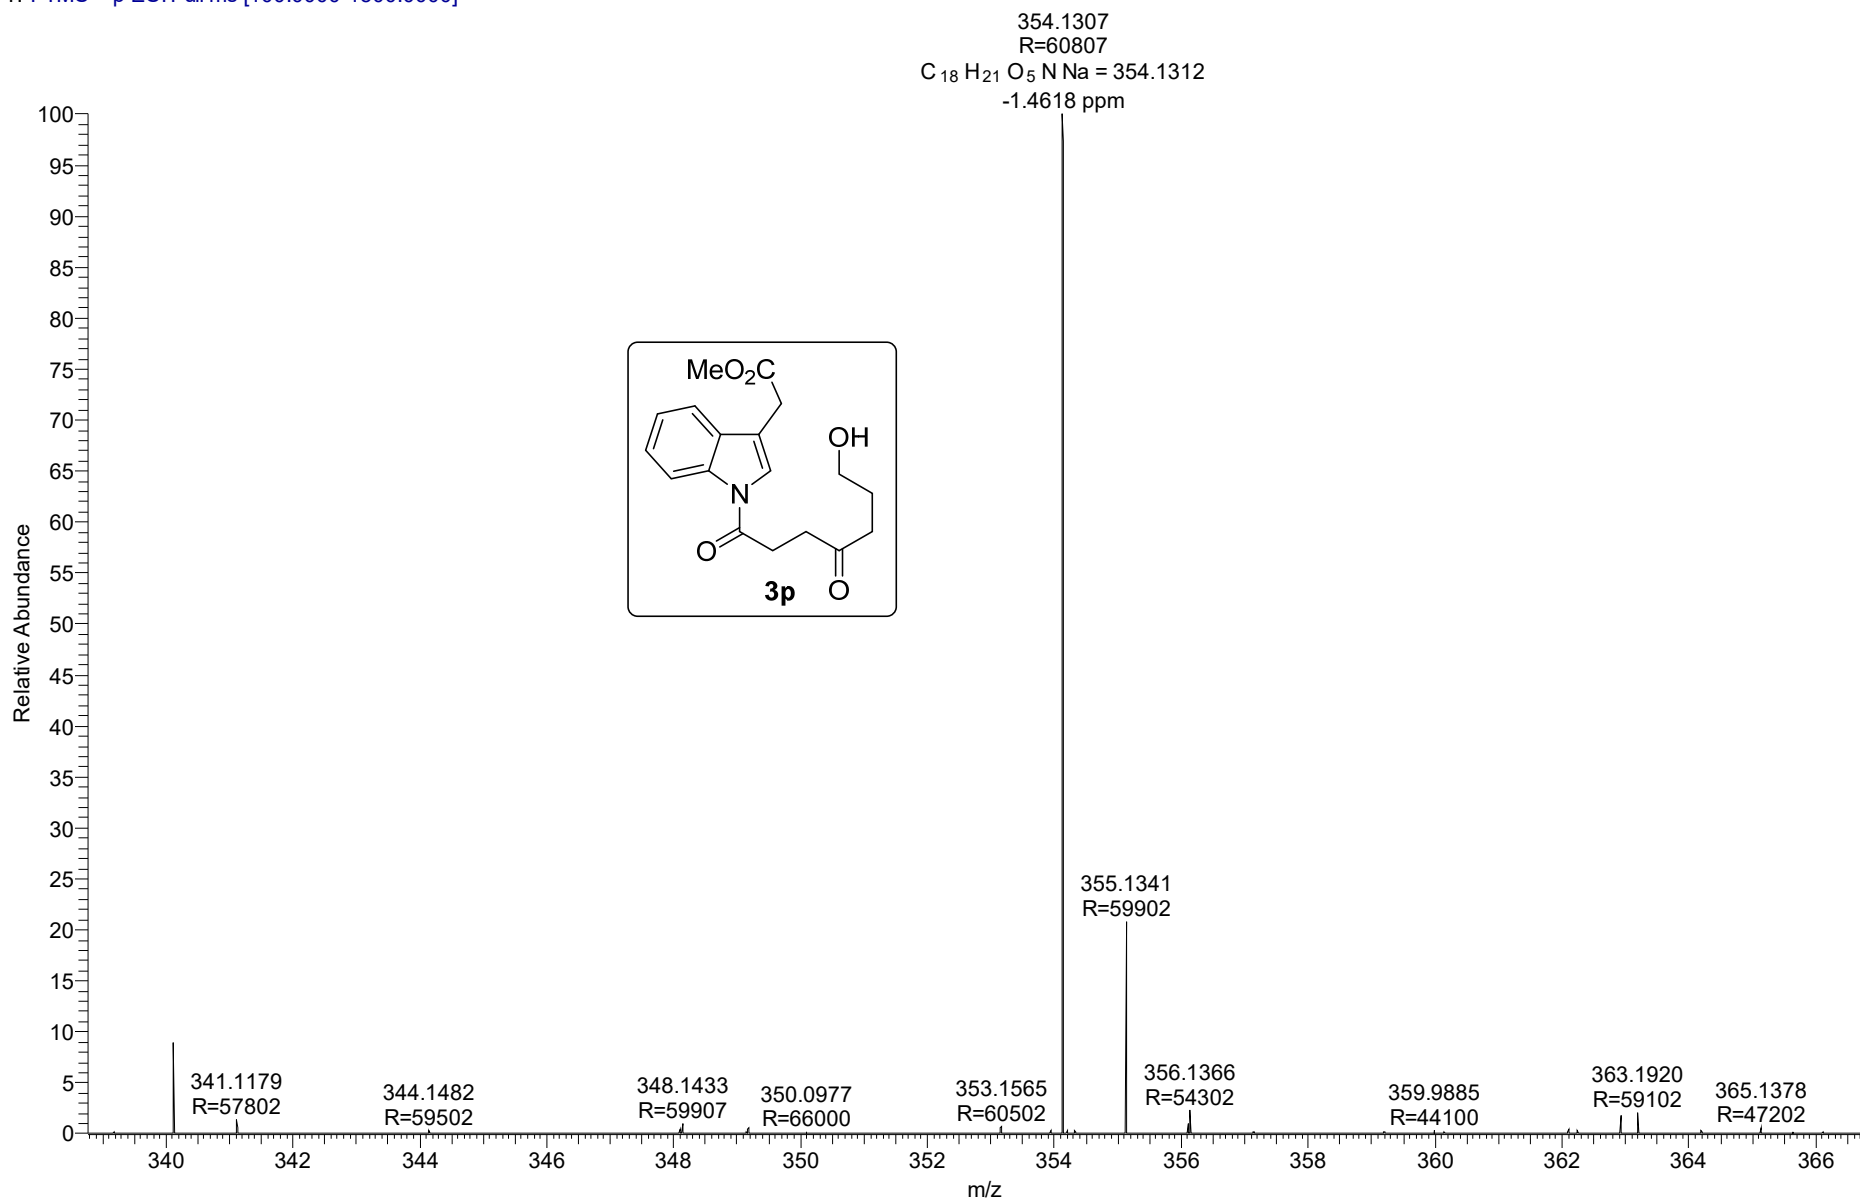

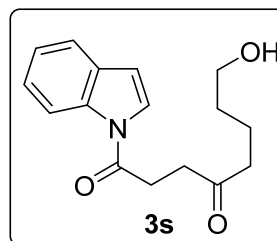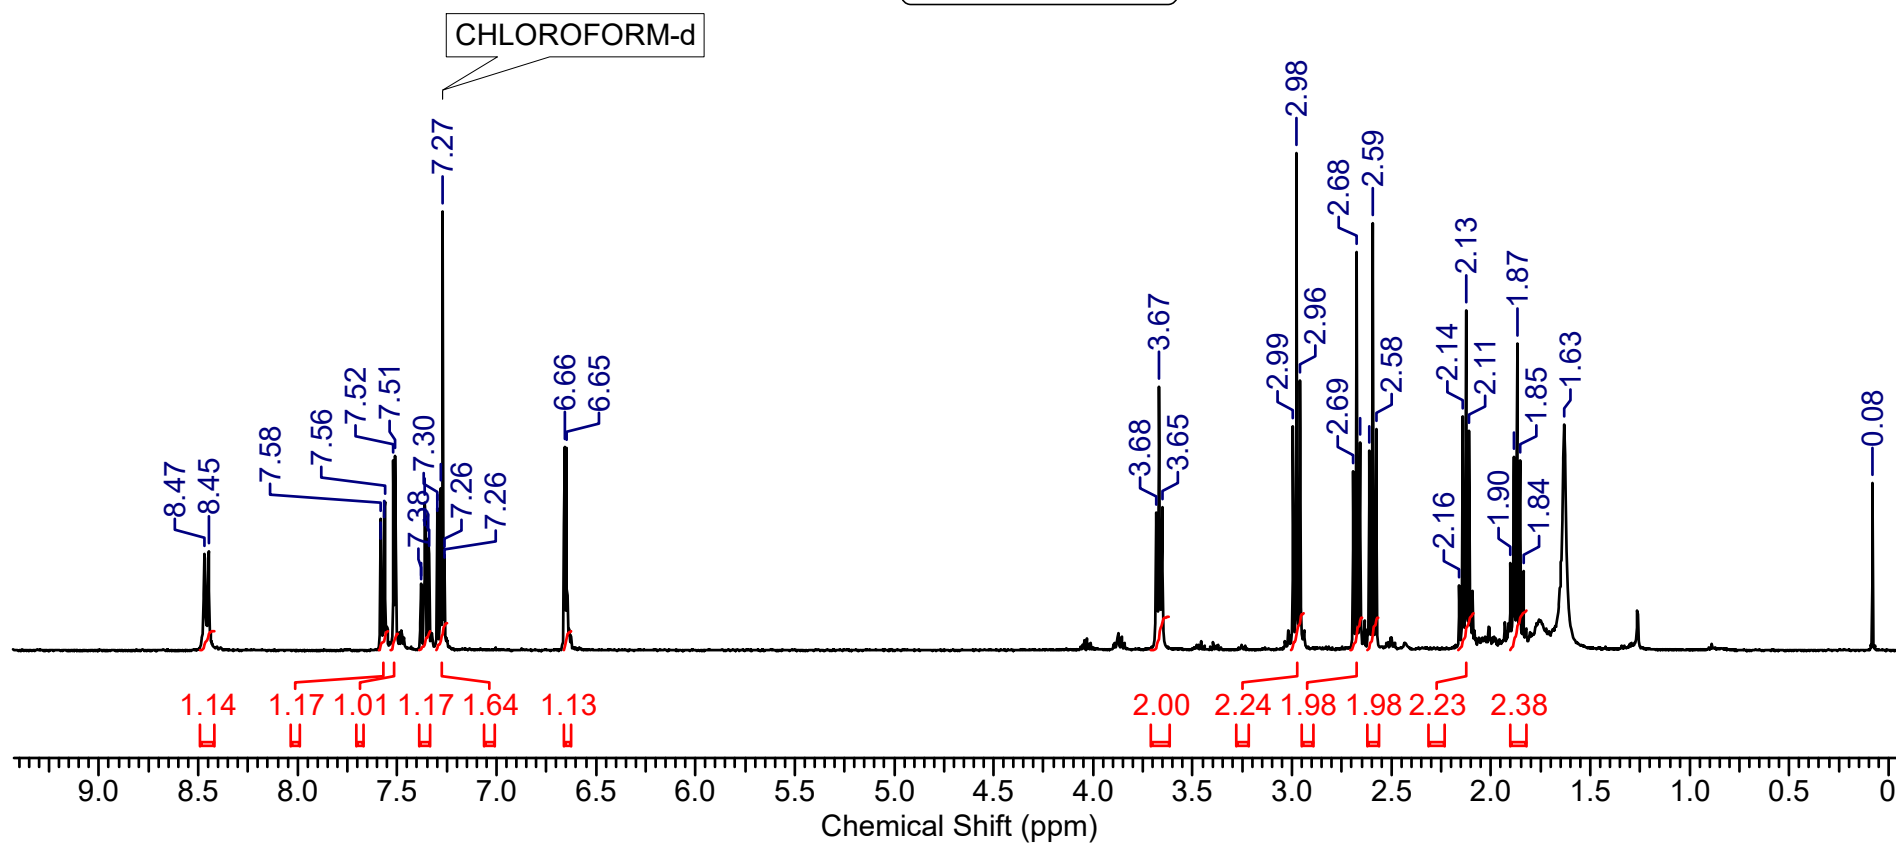

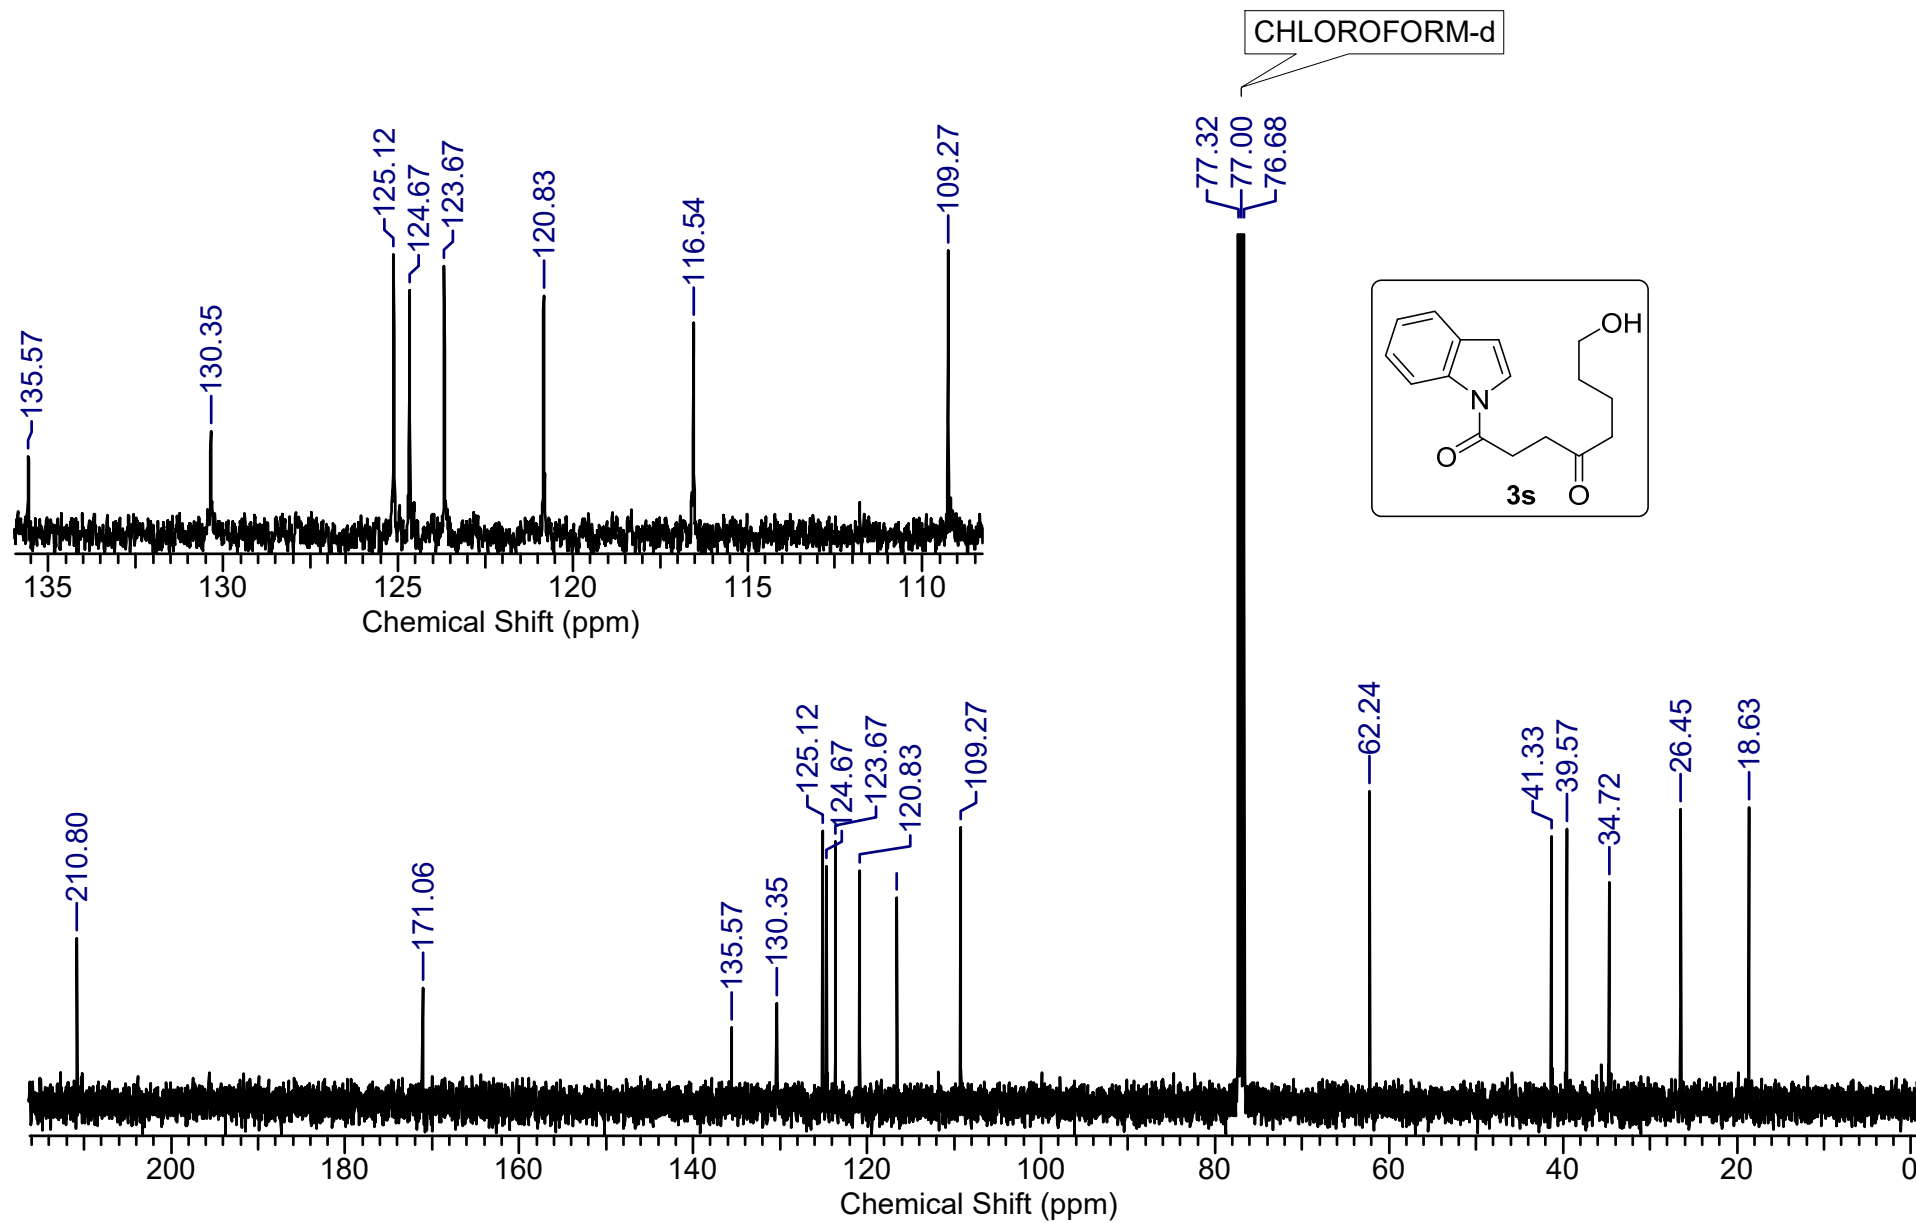

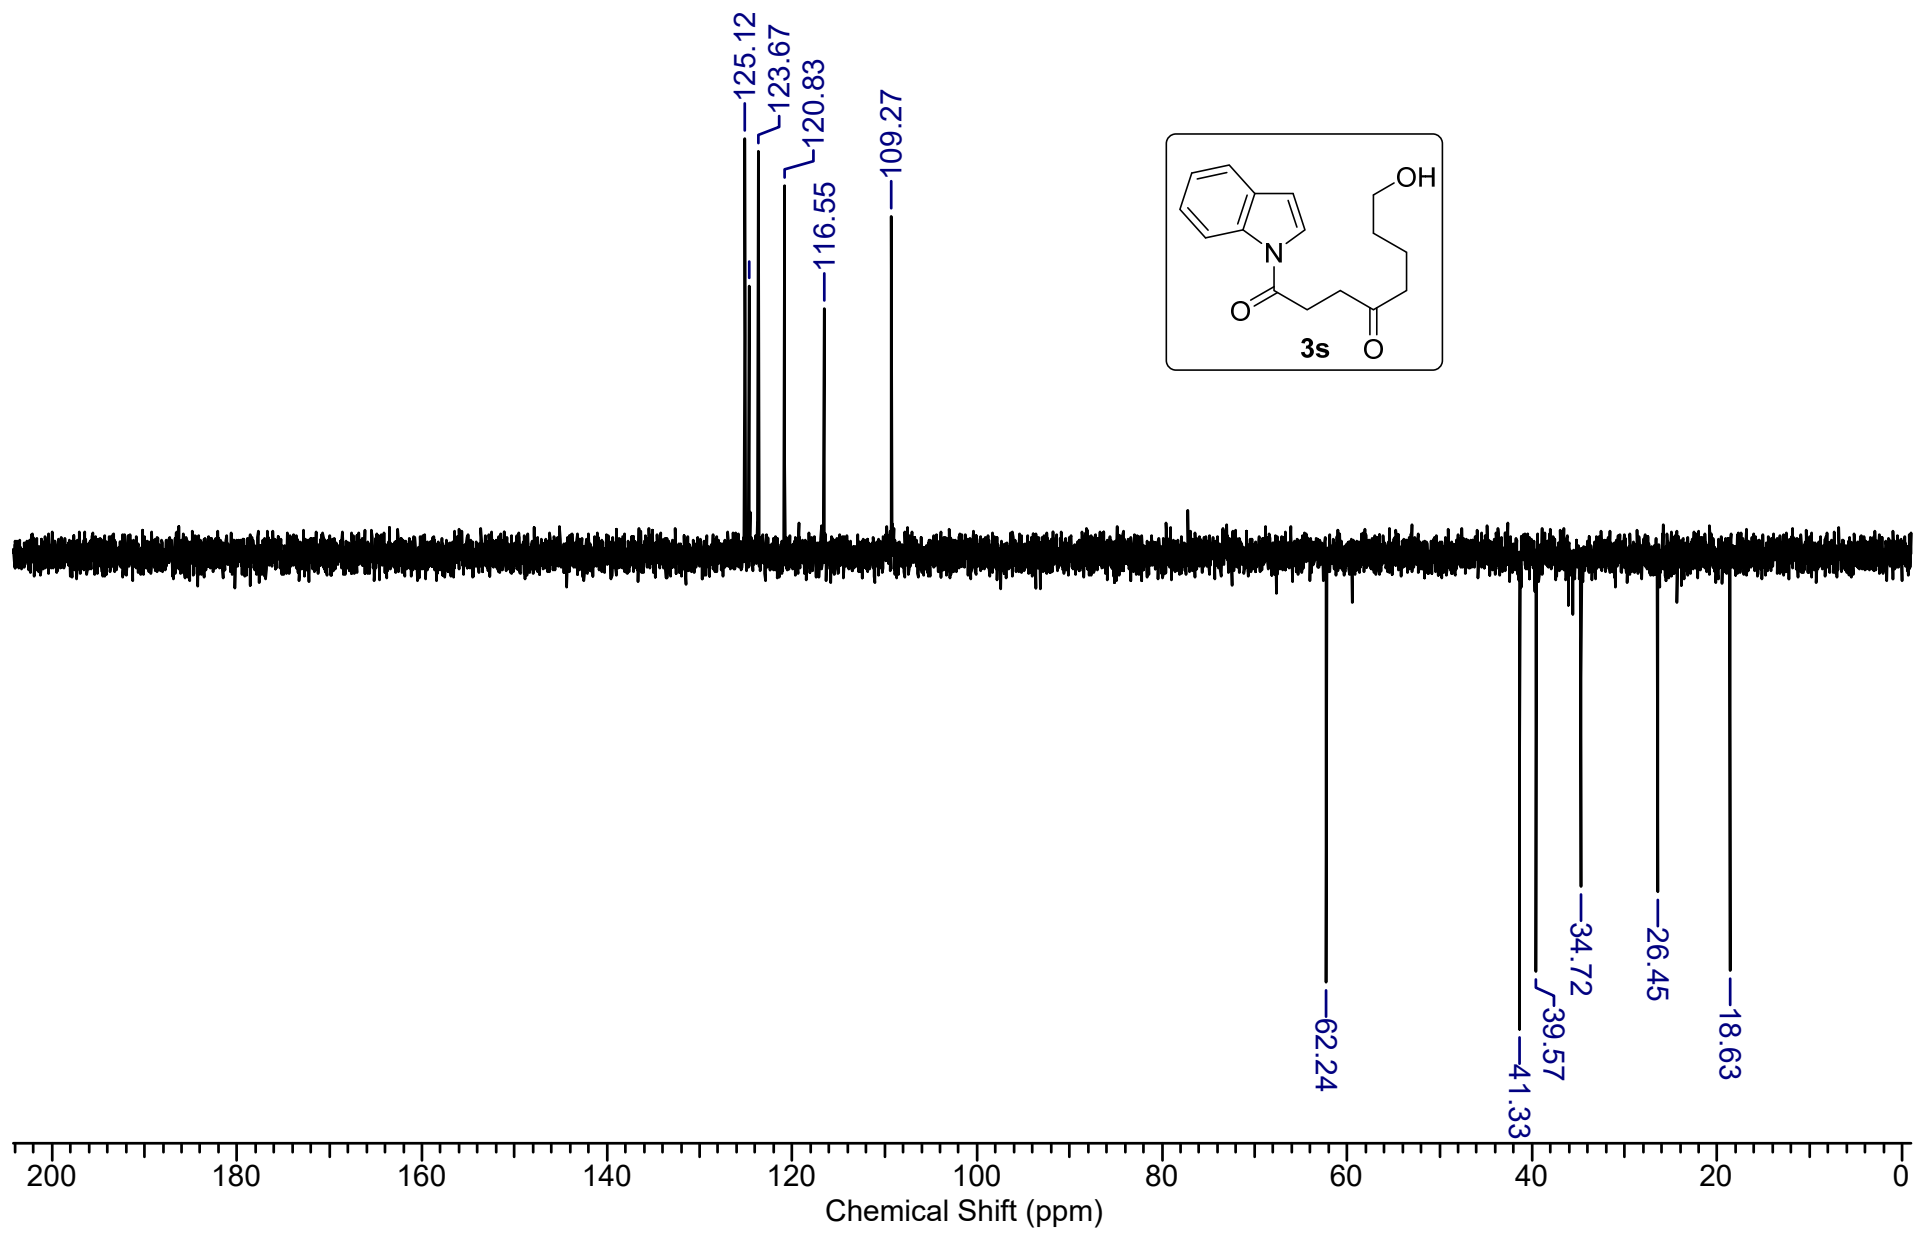



MSH-59 #322 RT: 1.75 AV: 1 NL: 1.86E8  
T: FTMS + p ESI Full ms [100.0000-1500.0000]

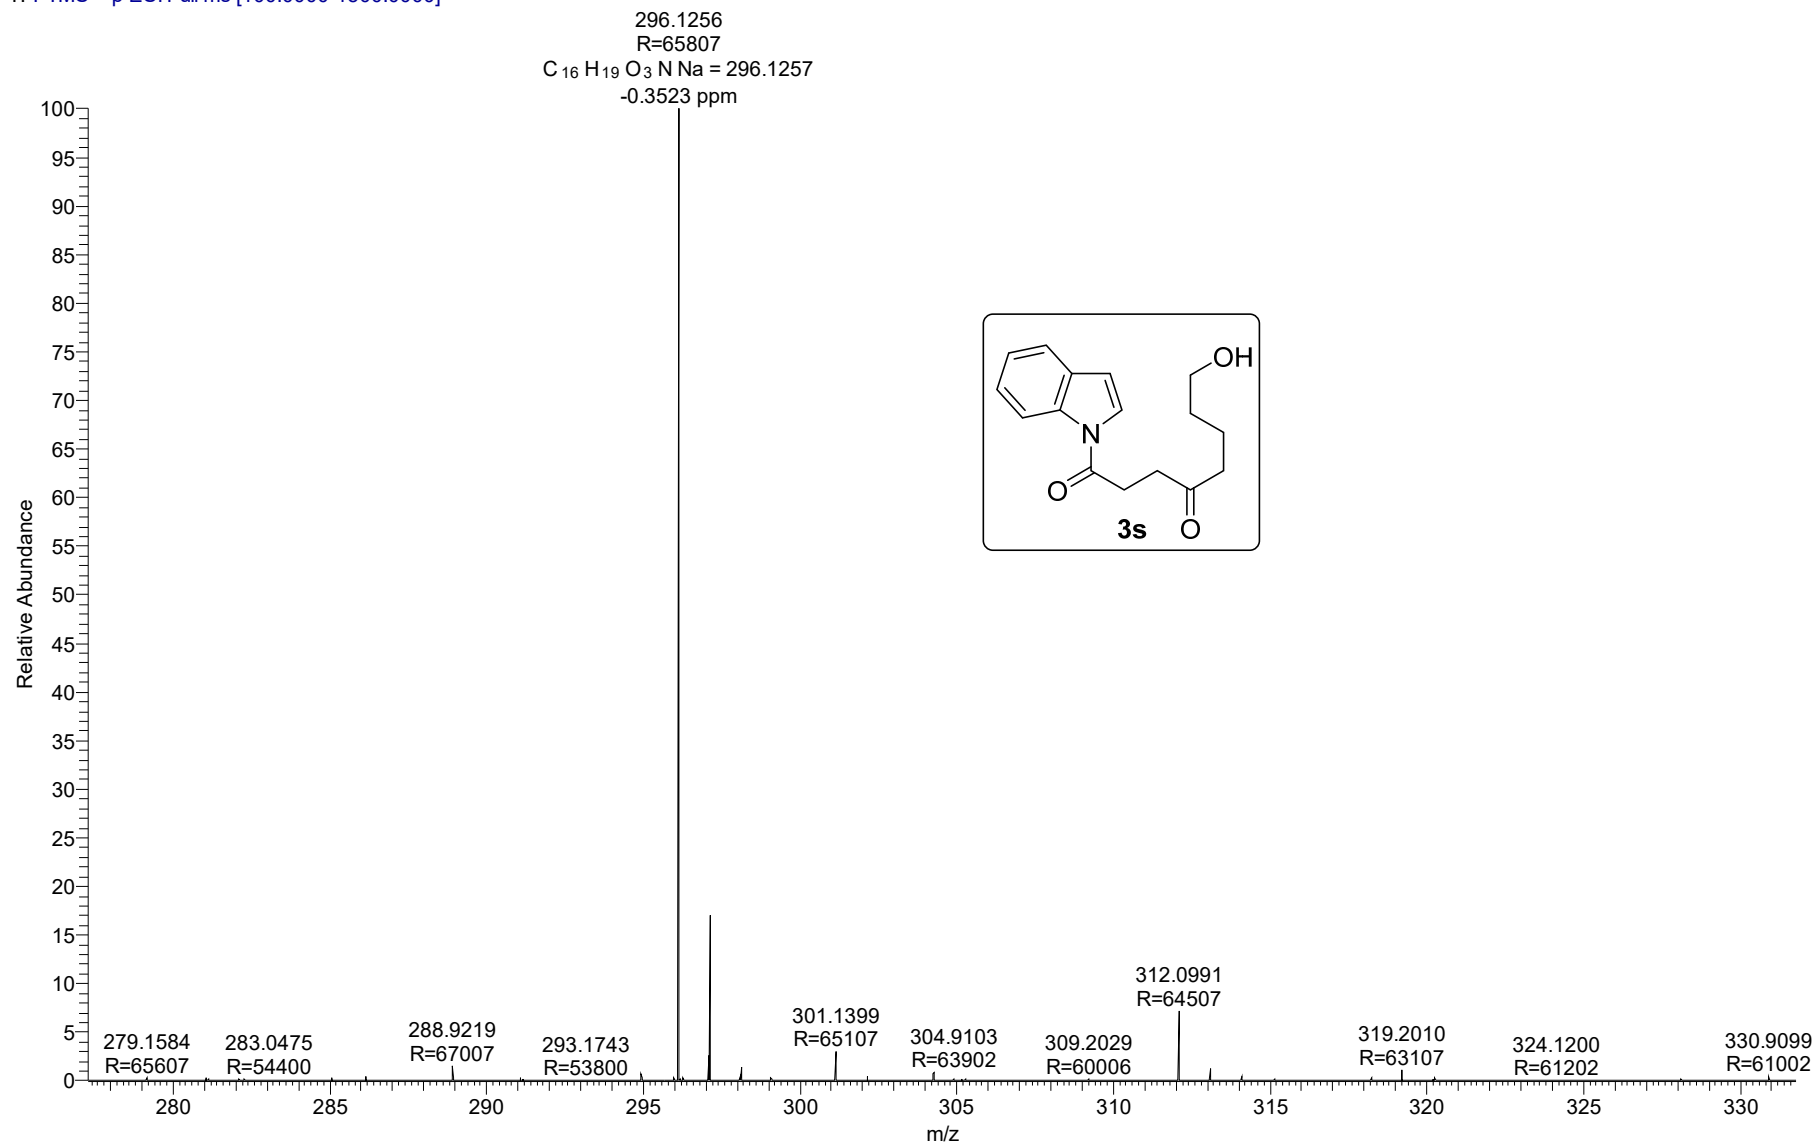

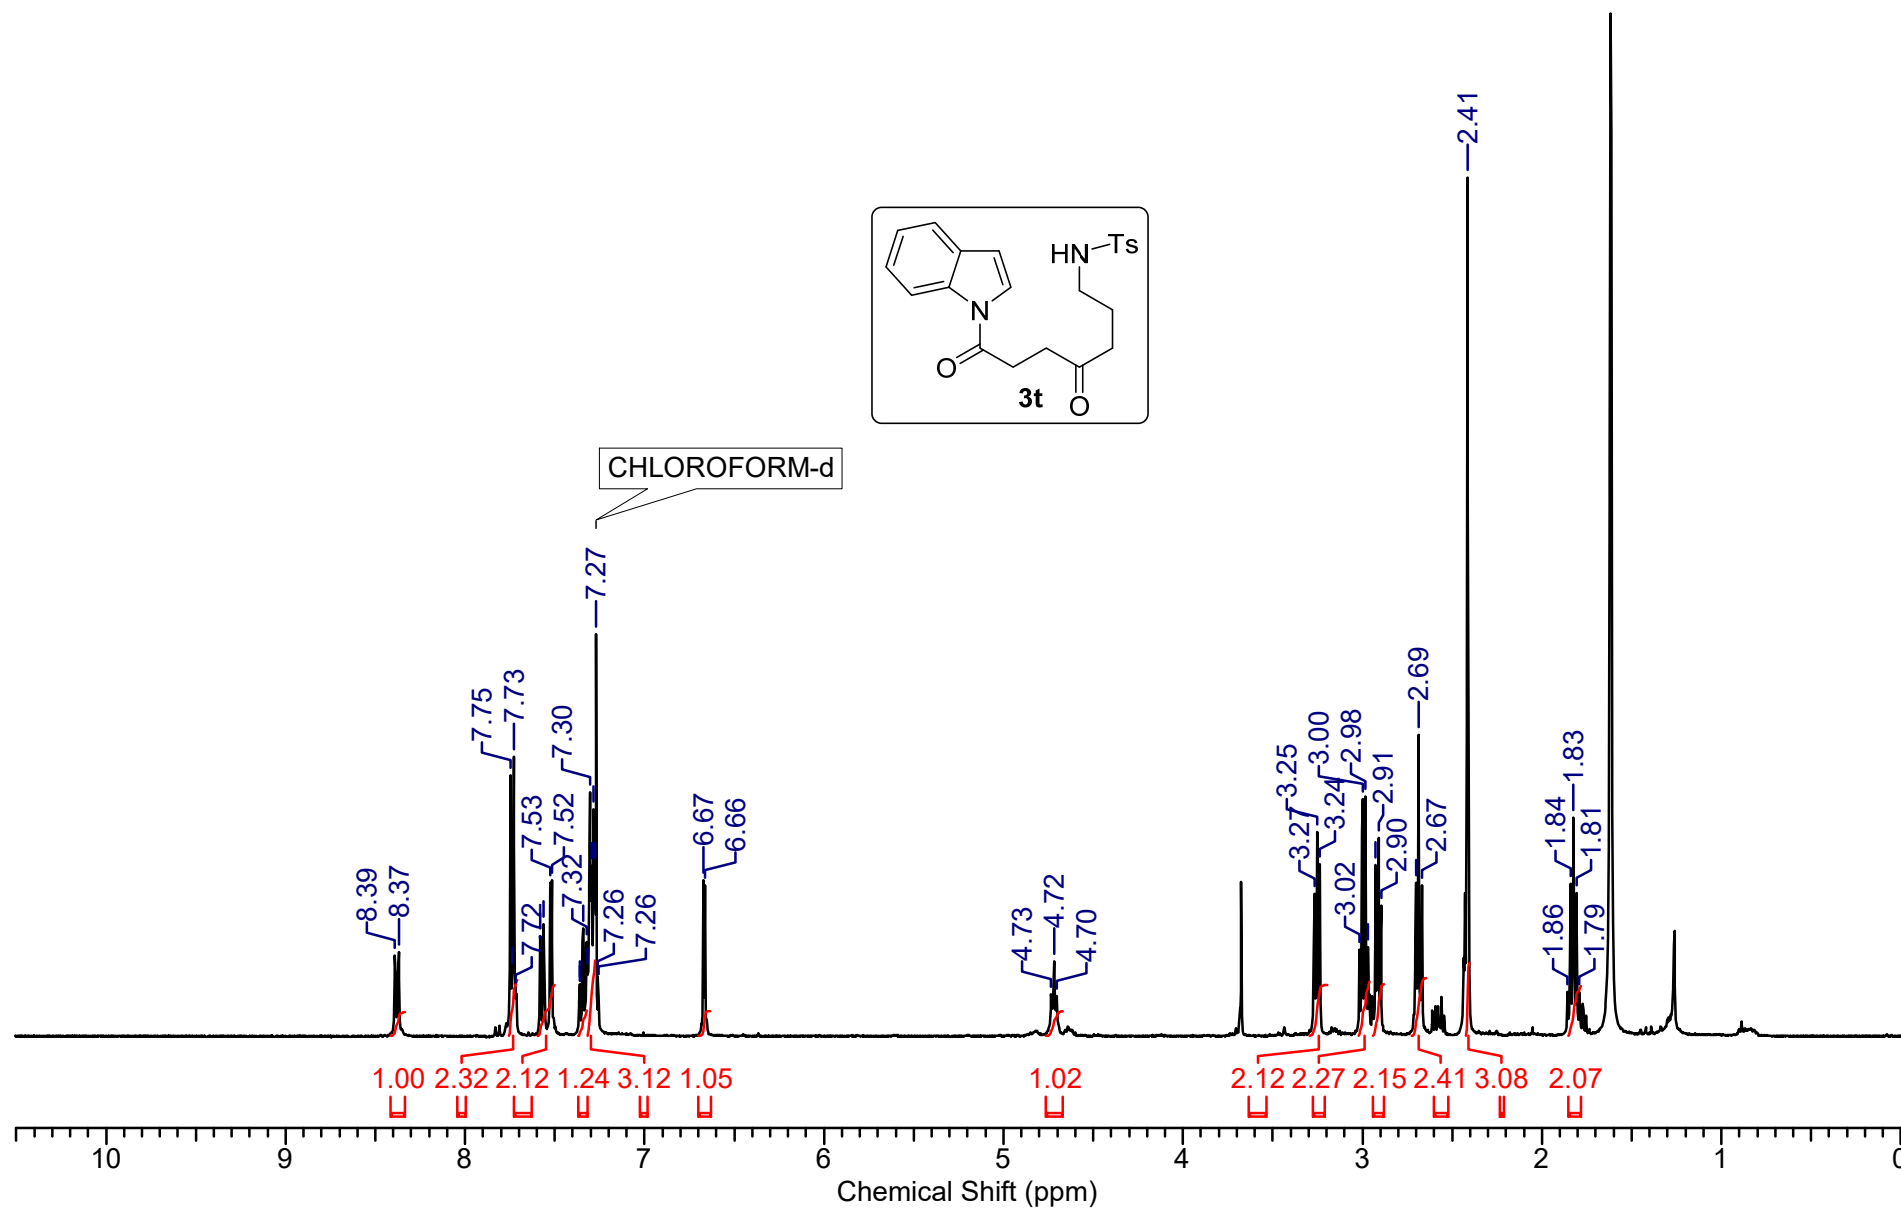

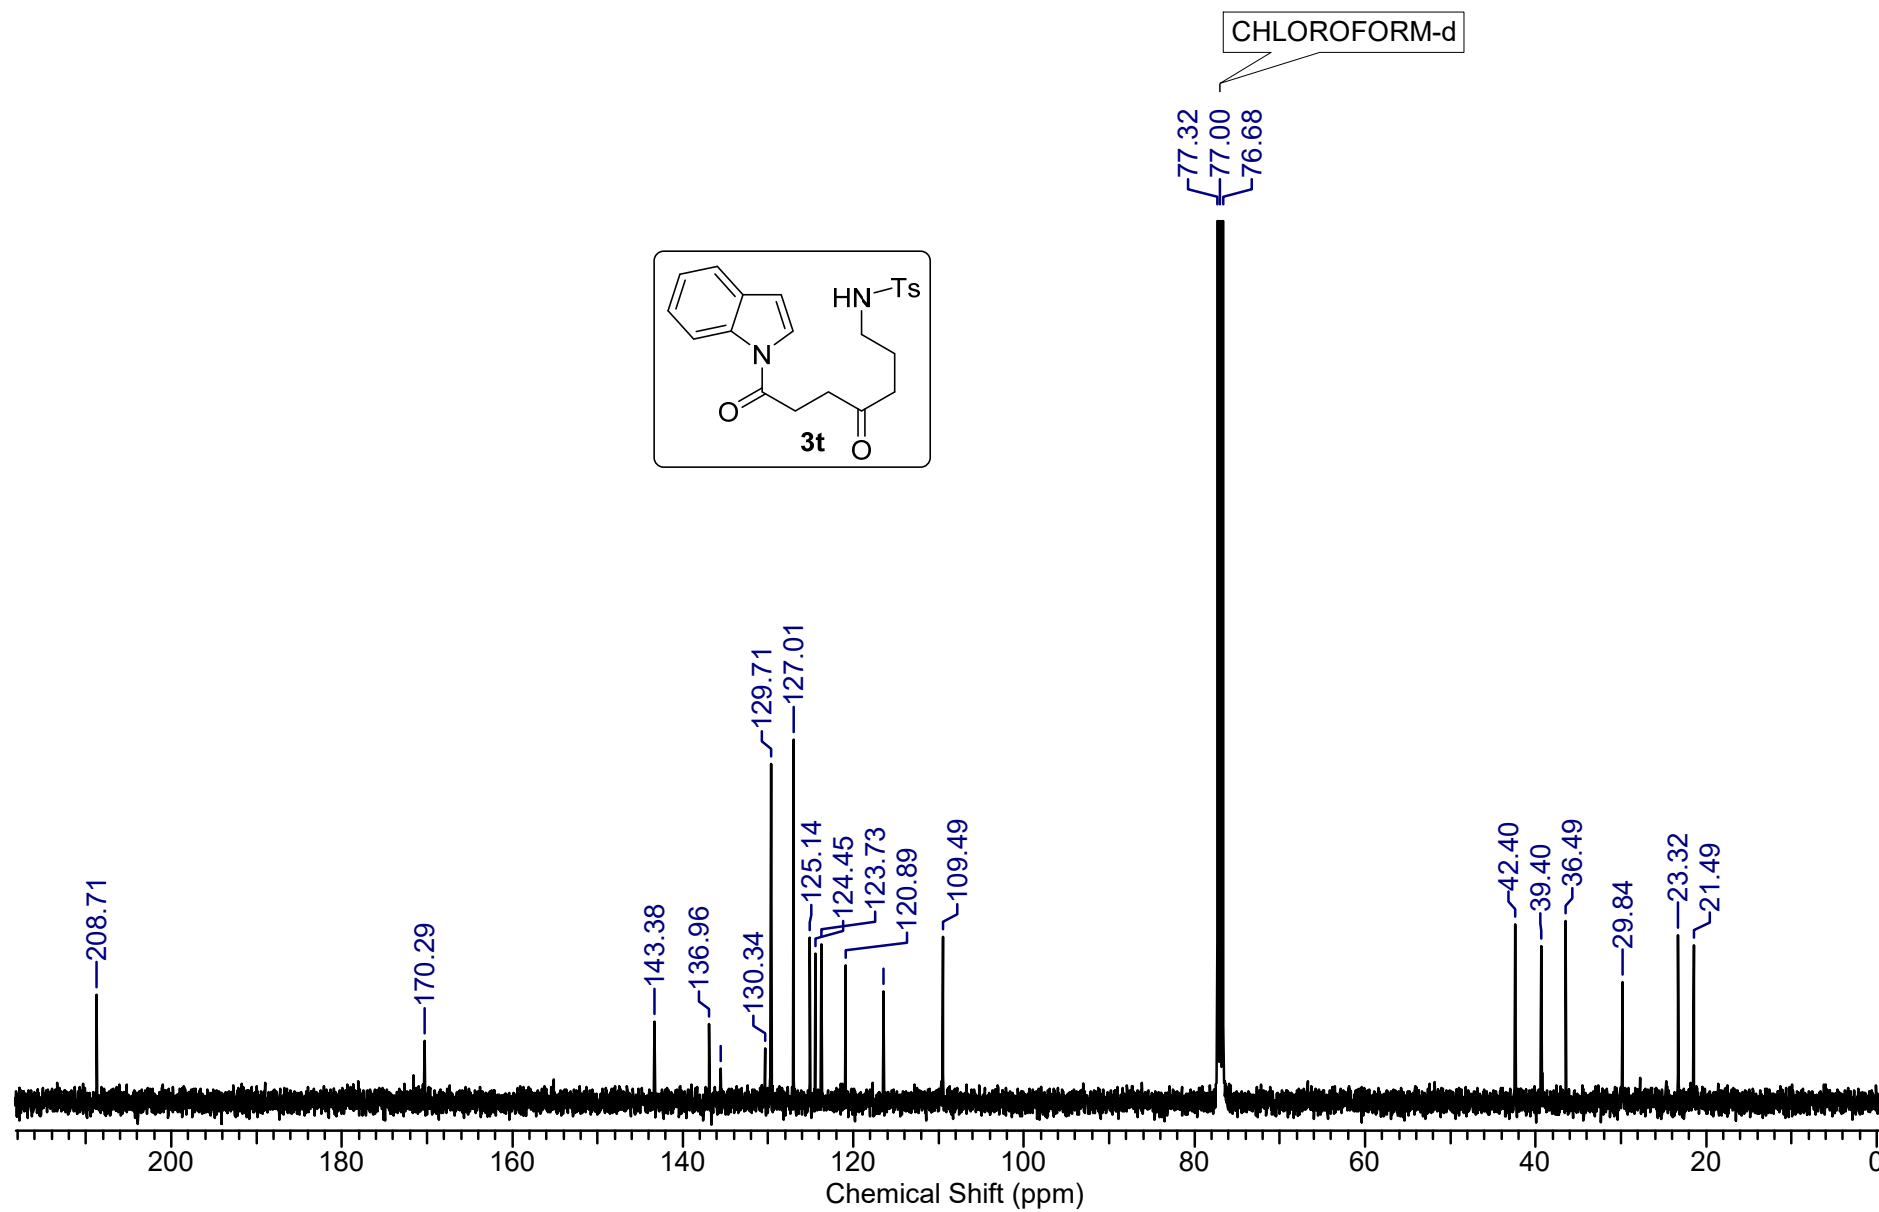

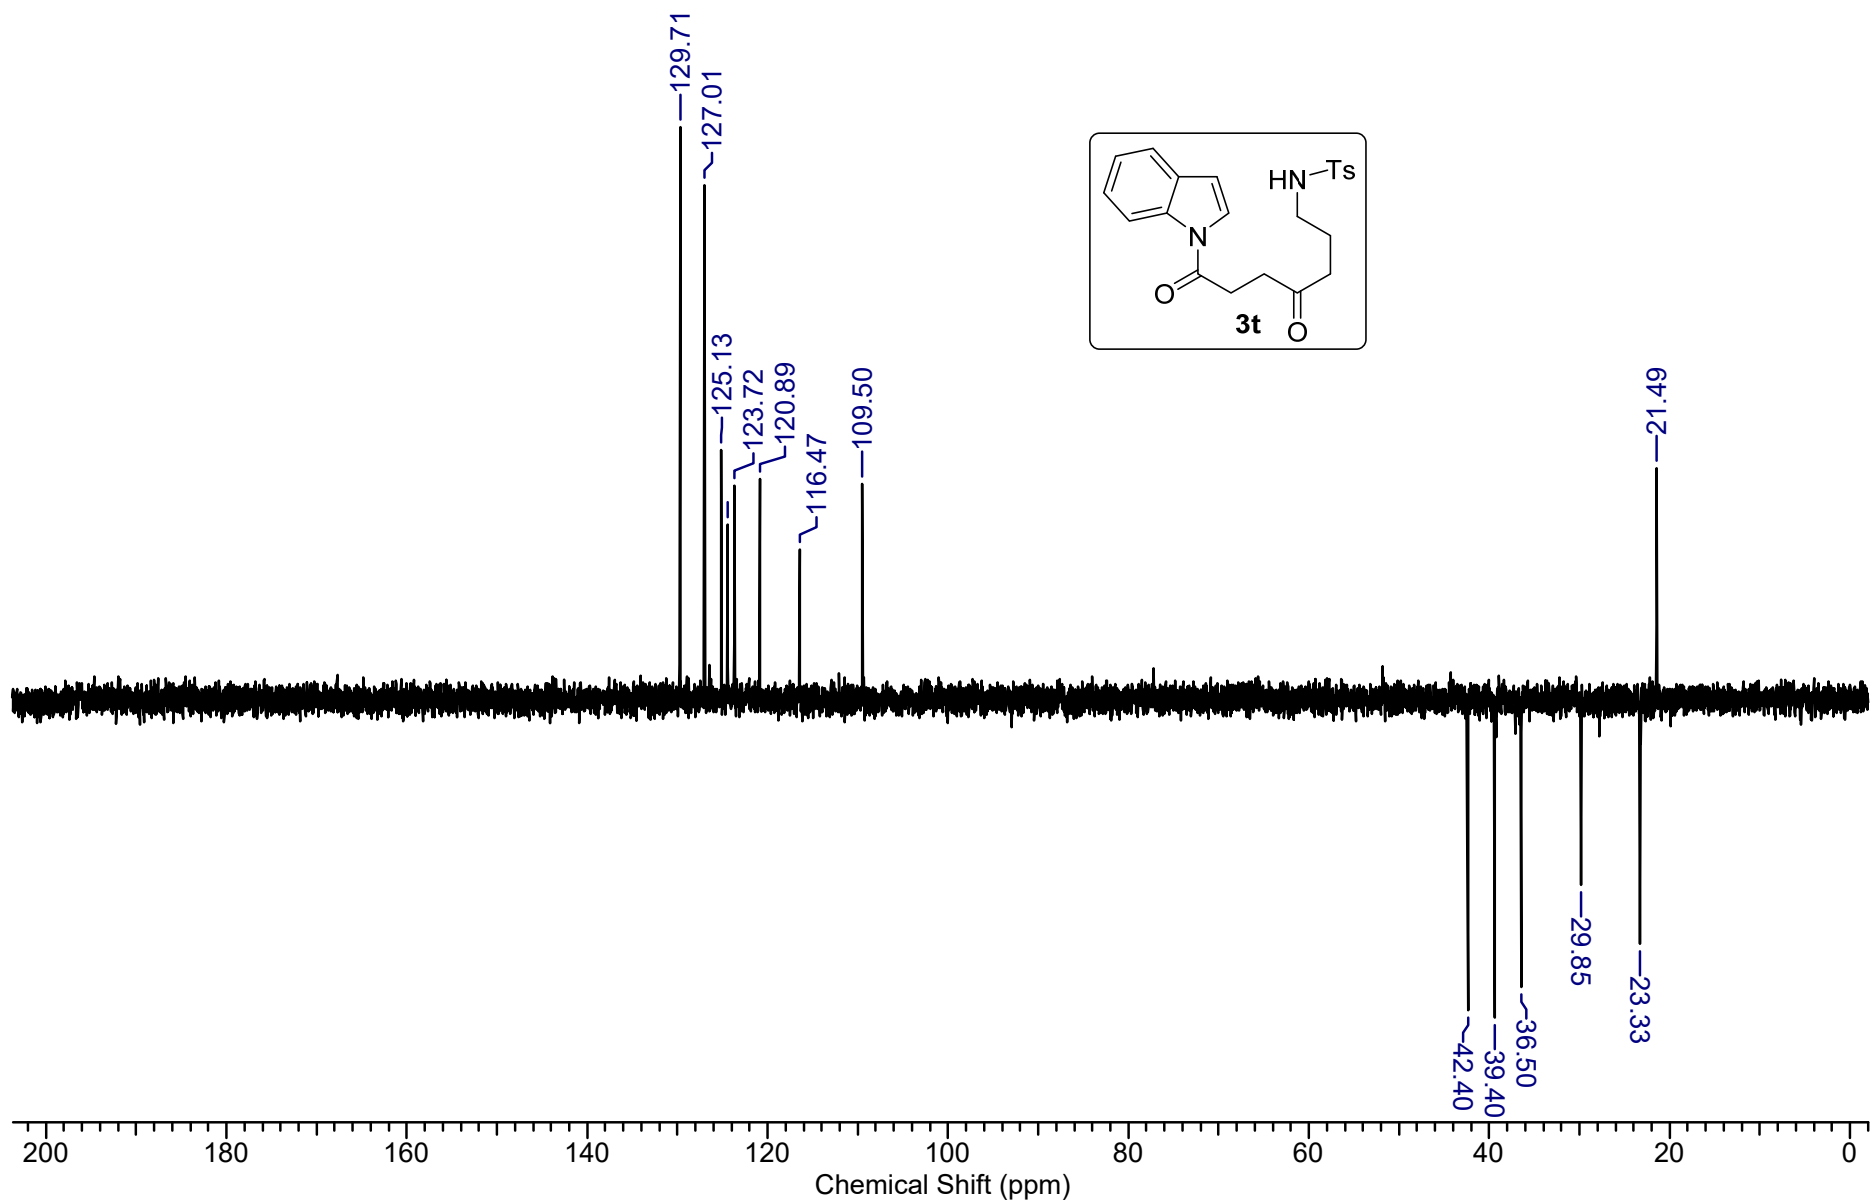

MS-18 #253 RT: 1.35 AV: 1 NL: 6.78E7  
T: FTMS + p ESI Full ms [100.0000-1500.0000]

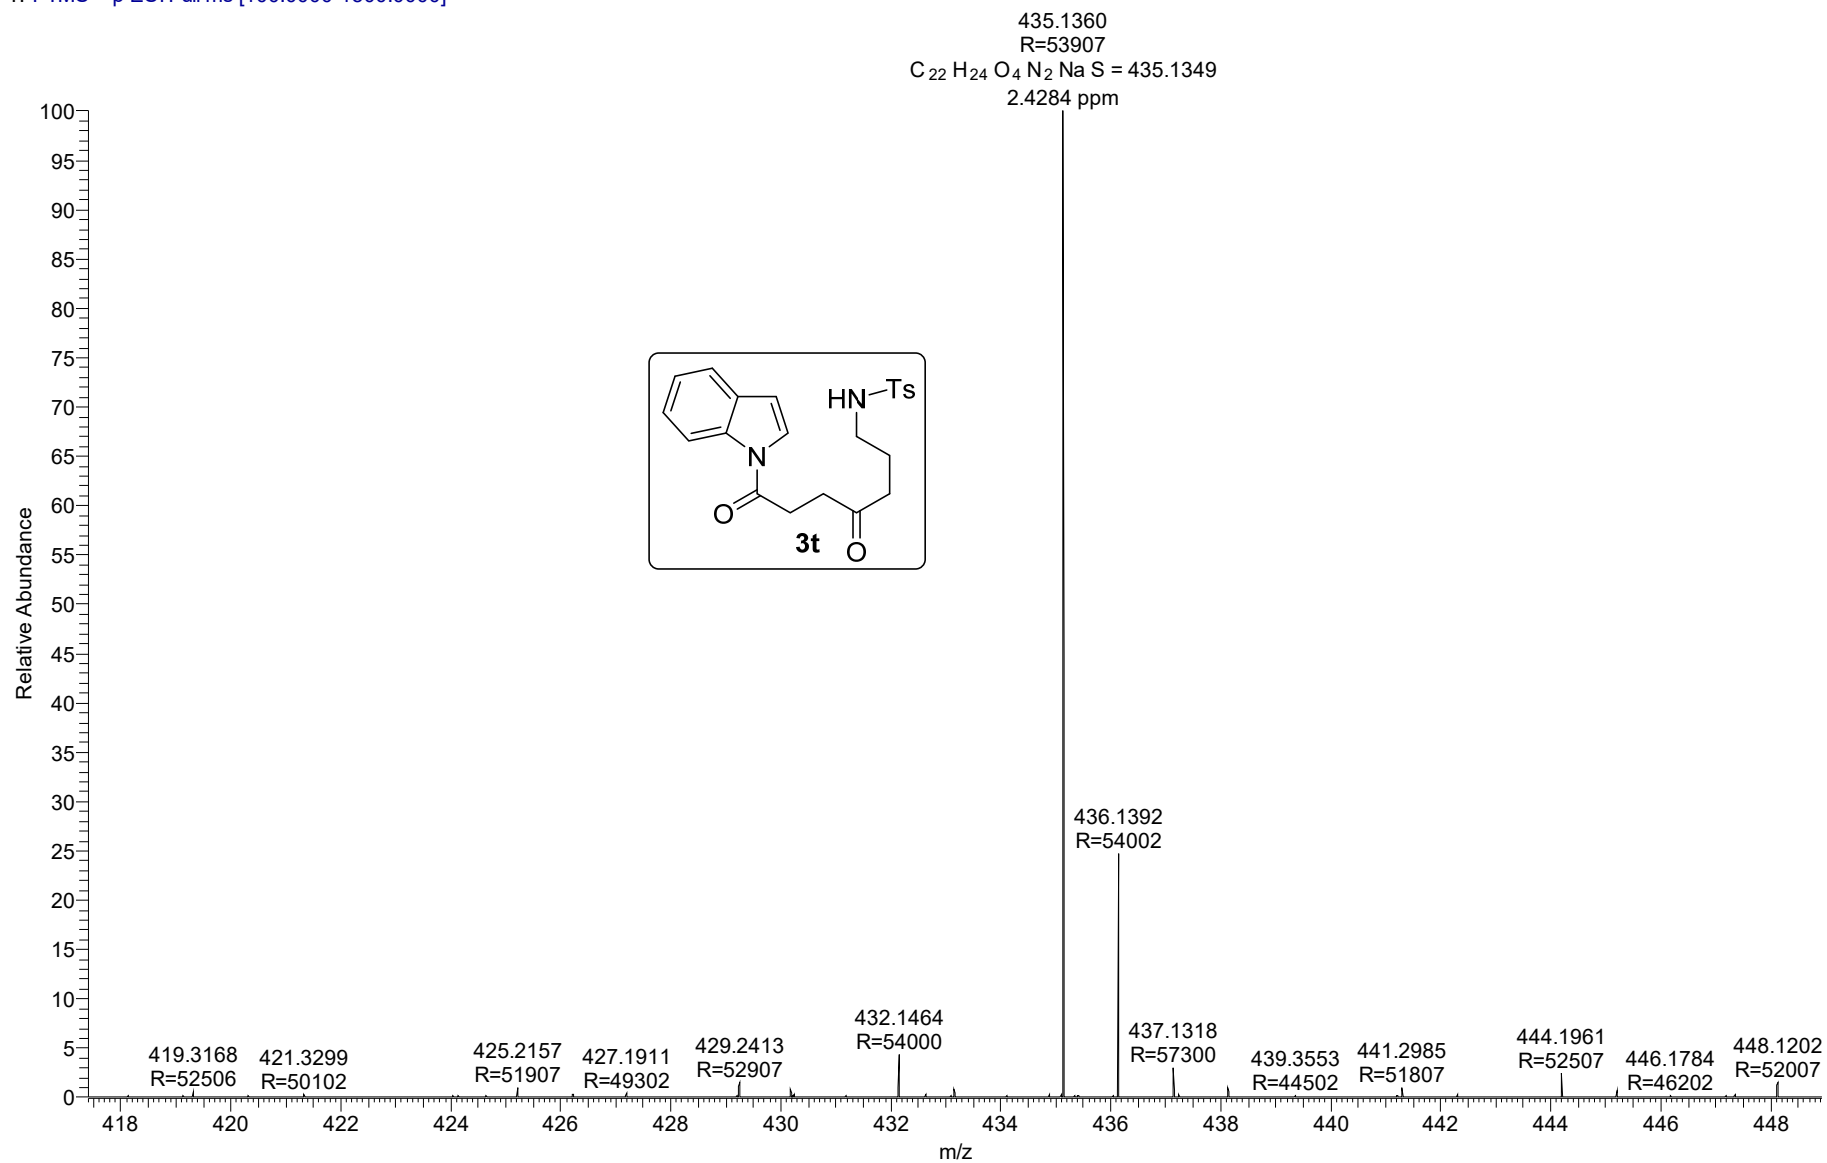

Supplement: d1ob02483c1.pdf [file d1ob02483c1.pdf]
